# Supplementary material for: Integration of lncRNA–miRNA–mRNA reveals novel insights into oviposition regulation in honey bees
Source: PeerJ. 2017 Oct 5;5:e3881. doi: 10.7717/peerj.3881 (PMC5632538; doi:10.7717/peerj.3881)
Supplement: Table S1 [file peerj-05-3881-s001.xlsx]

## Sheet: result
Validation of lncRNAs,mRNAs and miRNAs by real time PCR
	Virgin Queens		Normal queens		Oviposition inhition queens		Oviposition recovery queens
	RT-PCR	Sequencing	RT-PCR	Sequencing	RT-PCR	Sequencing	RT-PCR	Sequencing
XLOC_036321	1	56.5966	0.273775	13.1712	0.204828	0.204828	0.457237	35.0781
XLOC_186215	1	163.831	2.16133	1419.11	1.09731	1.09731	1.74473	493.441
XLOC_110621	1	94.6727	0.948258	28.3968	1.16365	1.16365	0.869627	90.2572
XLOC_145609	1	70.7219	0.676961	48.5857	1.29902	1.29902	0.666836	68.4478
XLOC_151643	1	395.612	1.18851	584.029	1.01013	1.01013	1.17602	566.42
408308	1	740.885	0.797574	533.703	0.925913	0.925913	1.43761	1019.83
409141	1	68.2436	0.759619	41.978	0.676966	0.676966	1.15185	73.1266
409148	1	738.796	0.697137	425.444	0.794323	0.794323	3.38741	916.924
408572	1	94.2331	7.54575	157.14	0.99376	0.99376	5.05432	120.004
726542	1	1483.55	8.10178	11960.1	9.85049	12115.3	9.07595	10323.6
ame-miR-100	1	1	0.988715	0.89697	0.860348	0.675157	1.07832	1.20233
ame-miR-125	1	1	0.940469	0.85446	0.91889	0.615927	1.24959	1.26798
ame-miR-263a	1	1	28.4226	4.18022	0.471649	0.657745	1.97821	1.29204
ame-miR-279c	1	1	5.93546	2.87374	1.21127	1.05536	0.923852	0.780255
ame-miR-3791	1	1	101.231	4.97518	0.291972	0.728623	1.72038	1.14814

## Sheet: primer
	Primers for real time PCR
Transcript_id	Genes_id	Sequence(5'-3')	Size（bp）
Novel_000381	XLOC_036321	TGCTCCTTTACAATGGTGGG	103
		TCGTACAATATGACTTCCCATCA
TCONS_00704746	XLOC_186215	AGGAGCCAGCATCAAATTCT	170
		TGATGTCACTTCCAAGAATCCTC
TCONS_00401505	XLOC_110621	GCCTGACGGAGAAAACAAGG	135
		TTCTGCTGCCCTCTCTTCAA
Novel_001296	XLOC_145609	TGCAGGCCGTTAATTGATCG	118
		TATCTATGTCGCATGCCCGT
TCONS_00534650	XLOC_151643	ACAAGTGAAAATGCCGGGAC	116
		TACAGCAGCATTTGTCACCG
XM_391859.5	408308	agacgaacatcagctccagt	135
		tatagcgacacctccagcag
XM_392667.5	409141	tgcctcaatttgtacaatgggt	121
		acacattcctacaccaccca
XM_001242656.1	409148	cgaccttggtctctggaact	115
		cccaatggagaactgaatggg
XM_392114.5	408572	aggcagccagaacattaggt	121
		ttacccgcctttctaccgag
XM_003251571.2	726542	cctggaactgttgctcttcg	103
		cttgcgcaatttcacgaacg
	honey bee actin	ctgctgcatcatcctcaagc	101
		gaaaagagcctcgggacaac
ame-mir-100		AACCCGtAGAtCCGAACttGtG
ame-mir-125		atCCCCtGAGACCCtAACttGtGA
ame-mir-263a		GtAAAtGGCACtGGAAGAAttCAC
ame-mir-279c		tGACtAGAGtCACACtCGtCCA
ame-mir-3791		tCACCGGGtAGGAttCAtCCA
	U6	CTCGCTTCGGCAGCACAtat	100
		AACGCTTCACGAATTTGCGT
