# Supplementary material for: Integration of lncRNA–miRNA–mRNA reveals novel insights into oviposition regulation in honey bees
Source: PeerJ. 2017 Oct 5;5:e3881. doi: 10.7717/peerj.3881 (PMC5632538; doi:10.7717/peerj.3881)
Supplement: Table S2 [file peerj-05-3881-s002.xlsx]

## Sheet: DE lncRNAs and DE mRNs_Que_Vir
DE lncRNAs and DE mRNAs in ovary activation process
transcript_id	gene_id	gene_name	length	Que_FPKM	Vir_FPKM	log2(foldchange)	pvalue	qvalue
NM_001010975.1	406075	-	1244	467.822	306.818	0.608578	5e-05	0.000627385
NM_001011562.1	406065	-	835	0.287644	1.69141	-2.55587	0.00415	0.0316952
NM_001011565.1	406068	-	2968	4.03412	2.4301	0.731238	0.0016	0.0140101
NM_001011567.1	406070	-	4031	0.293709	0.773907	-1.39777	0.00585	0.0424518
NM_001011570.1	406076	-	582	358.025	204.738	0.806283	5e-05	0.000627385
NM_001011572.1	406078	-	2313	27.0496	59.5869	-1.13939	5e-05	0.000627385
NM_001011578.1	406088	-	5393	6.04182	170.525	-4.81886	5e-05	0.000627385
NM_001011581.1	406092	-	2409	27.0297	64.5718	-1.25636	5e-05	0.000627385
NM_001011583.2	406094	-	604	64.0014	543.225	-3.08538	5e-05	0.000627385
NM_001011584.1	406095	-	1588	0	0.611445	#NAME?	5e-05	0.000627385
NM_001011592.1	406108	-	1578	42.8091	70.5972	-0.721693	0.00065	0.00638377
NM_001011594.1	406110	-	4192	0.329481	2.70699	-3.03842	5e-05	0.000627385
NM_001011598.1	406114	-	1624	59.9194	0.677382	6.46691	5e-05	0.000627385
NM_001011600.1	406117	-	2052	42.6047	20.0676	1.08614	5e-05	0.000627385
NM_001011601.1	406121	-	1809	0.20209	0.728343	-1.84962	0.00085	0.00808185
NM_001011602.1	406123	-	2784	22.5258	11.099	1.02116	5e-05	0.000627385
NM_001011607.1	406130	-	374	10.3546	151.915	-3.87492	5e-05	0.000627385
NM_001011616.2	406143	-	680	7.05989	34.8788	-2.30463	5e-05	0.000627385
NM_001011636.1	409798	-	560	16.4406	33.9215	-1.04494	5e-05	0.000627385
NM_001011641.1	494506	-	970	17.628	27.1728	-0.624297	0.0016	0.0140101
NM_001011643.1	494511	-	2363	0.290518	0.715475	-1.30027	0.00165	0.0143795
NM_001011644.2	494522	-	1200	8.20264	2.82733	1.53665	0.005	0.037132
NM_001011651.1	408379	-	460	1.14256	14.2498	-3.6406	5e-05	0.000627385
NM_001011652.1	408380	-	460	3.15082	10.057	-1.6744	0.00015	0.00171726
NM_001011653.1	494503	-	448	63.8187	35.8708	0.831169	0.00015	0.00171726
NM_001012962.1	503861	-	3606	1.30044	5.08363	-1.96686	5e-05	0.000627385
NM_001013361.1	410902	-	4113	4.6446	7.7739	-0.743085	5e-05	0.000627385
NM_001040204.1	410068	-	793	5.27917	11.7758	-1.15745	0.00025	0.00272364
NM_001040220.1	677668	-	483	97.3969	0	inf	5e-05	0.000627385
NM_001040225.1	677675	-	407	94.3955	5.21544	4.17786	5e-05	0.000627385
NM_001040229.1	677678	-	453	1.81788	6.18098	-1.76557	0.00045	0.00460371
NM_001040230.1	406104	-	12946	27.1847	20.5452	0.403991	0.0034	0.0267578
NM_001040234.1	409677	-	1500	5.59332	94.4491	-4.07776	5e-05	0.000627385
NM_001040236.1	409889	-	1767	34.9849	5.27793	2.72869	0.00185	0.0158744
NM_001040237.1	726946	-	5079	39.577	28.9695	0.450128	0.0013	0.011703
NM_001040258.1	411184	-	1251	4.02759	79.6855	-4.30633	5e-05	0.000627385
NM_001040259.1	411257	-	1743	66.2368	9.099	2.86385	5e-05	0.000627385
NM_001040267.1	595137	-	1895	20.2393	41.5669	-1.03827	5e-05	0.000627385
NM_001040681.1	692346	-	2146	6.60365	10.9946	-0.735467	0.0065	0.0463821
NM_001077810.1	408658	-	354	17.7009	71.9716	-2.0236	5e-05	0.000627385
NM_001077819.1	725103	-	378	225.281	23.5832	3.25589	5e-05	0.000627385
NM_001077825.1	768250	-	1158	2.083	0.429811	2.27689	5e-05	0.000627385
NM_001078661.1	751767	-	315	561.303	5.37399	6.70664	5e-05	0.000627385
NM_001079561.1	725996	-	1699	56.0049	30.5399	0.874857	5e-05	0.000627385
NM_001080094.2	411672	-	2123	15.6966	6.0059	1.386	0.0002	0.00222634
NM_001080110.1	410309	-	2703	14.4418	6.53391	1.14423	0.00025	0.00272364
NM_001080205.1	408611	-	2697	37.6451	23.5514	0.676646	5e-05	0.000627385
NM_001085344.1	100037419	-	514	0.735583	2.7287	-1.89125	0.0032	0.0254182
NM_001085345.1	551367	-	1491	0.341662	0.864023	-1.3385	0.0027	0.0220069
NM_001098218.1	726755	-	774	2.91148	11.9166	-2.03315	5e-05	0.000627385
NM_001098224.2	411303	-	1333	0.717215	5.46821	-2.93059	5e-05	0.000627385
NM_001098229.1	726079	-	1284	0.303197	2.51784	-3.05386	5e-05	0.000627385
NM_001098232.1	726393	-	1123	55.7099	4.21453	3.72449	5e-05	0.000627385
NM_001110712.2	100126690	-	754	0.979313	3.09197	-1.65868	0.00035	0.00368417
NM_001110764.1	726848	-	2278	4.22834	7.21271	-0.770452	0.0005	0.00505175
NM_001114198.1	552391	-	707	131.934	42.2186	1.64387	5e-05	0.000627385
NM_001126244.1	410928	-	1832	5.63193	1.82075	1.62909	5e-05	0.000627385
NM_001131038.1	100174948	-	2706	9.65754	13.8375	-0.518856	0.00195	0.0166197
NM_001134371.1	100187709	-	591	17.7096	42.6807	-1.26905	5e-05	0.000627385
NM_001134668.1	409389	-	2541	110.421	60.7222	0.862724	5e-05	0.000627385
NM_001134828.1	724970	-	1432	11.8039	33.6819	-1.51271	5e-05	0.000627385
NM_001134935.1	725126	-	2337	6.00517	23.8264	-1.98828	5e-05	0.000627385
NM_001134940.1	406080	-	1464	8.62659	1.55176	2.47489	5e-05	0.000627385
NM_001134950.1	551691	-	2295	10.7983	1.59383	2.76023	0.0059	0.0427402
NM_001135735.1	406119	-	1032	65.9076	121.612	-0.883765	5e-05	0.000627385
NM_001136187.1	725609	-	589	172.991	127.34	0.442008	0.0061	0.0439284
NM_001136207.1	100192200	-	930	2.37039	4.29197	-0.856512	0.0054	0.0396288
NM_001142607.1	100216489	-	622	0.307254	7.55731	-4.62037	0.00015	0.00171726
NM_001142609.1	726134	-	1671	95.8504	9.00575	3.41187	5e-05	0.000627385
NM_001142656.2	411045	-	710	56.6692	345.431	-2.60776	5e-05	0.000627385
NM_001143921.1	409042	-	2072	0.0713145	0.547559	-2.94075	0.00165	0.0143795
NM_001145735.1	408613	-	1301	3.47813	9.32735	-1.42316	5e-05	0.000627385
NM_001159303.1	410451	-	1404	62.7142	83.4232	-0.411655	0.0042	0.0320253
NM_001159355.1	406084	-	2769	31.8885	4.74345	2.74903	5e-05	0.000627385
NM_001160050.1	409418	-	2428	3290.91	2237.97	0.556296	0.00025	0.00272364
NM_001160064.1	408928	-	2822	1055.5	653.283	0.69214	5e-05	0.000627385
NM_001160072.1	410620	-	2237	18.4295	33.7458	-0.872687	5e-05	0.000627385
NM_001160405.2	411453	-	2961	99.8179	42.4522	1.23346	5e-05	0.000627385
NM_001161787.1	100302106	-	935	68.5275	118.31	-0.787816	5e-05	0.000627385
NM_001162516.1	408855	-	1759	190.578	27.58	2.78869	5e-05	0.000627385
NM_001163712.1	725124	-	1155	53.3973	19.8549	1.42727	5e-05	0.000627385
NM_001163714.1	411899	-	1542	8.42714	46.1193	-2.45226	5e-05	0.000627385
NM_001163715.1	727472	-	854	1.32547	13.6726	-3.3667	5e-05	0.000627385
NM_001164008.1	551571	-	2213	10.6014	1.77086	2.58173	5e-05	0.000627385
NM_001164809.1	726644	-	502	50.5895	20.6673	1.29149	0.0015	0.0132566
NM_001165904.1	408764	-	5715	15.5958	7.55368	1.04591	0.00035	0.00368417
NM_001167836.1	409314	-	1455	8.50729	3.9365	1.11179	0.00085	0.00808185
NM_001170973.1	551975	-	1131	51.7134	210.551	-2.02556	5e-05	0.000627385
NM_001170974.1	410066	-	1454	71.2984	130.958	-0.87716	5e-05	0.000627385
NM_001171051.1	100328599	-	4101	29.0827	13.1904	1.14067	5e-05	0.000627385
NM_001172379.1	410065	-	1101	2.34697	25.3286	-3.43189	5e-05	0.000627385
NM_001174144.1	727145	-	534	0.623134	2.22222	-1.83439	0.0056	0.0408847
NM_001178021.1	494523	-	842	23.9839	67.9022	-1.50139	0.0016	0.0140101
NM_001178027.1	409398	-	804	487.355	314.456	0.632113	5e-05	0.000627385
NM_001178047.1	409097	-	1538	19.1463	45.1495	-1.23765	5e-05	0.000627385
NM_001185079.1	551163	-	3029	23.0229	37.7784	-0.714493	5e-05	0.000627385
NM_001185104.1	408404	-	810	71.889	50.9321	0.497197	0.00225	0.0188021
NM_001190814.1	726777	-	460	134.021	202.917	-0.598437	0.0009	0.00850416
NM_001191048.2	725259	-	6578	374.425	178.821	1.06616	5e-05	0.000627385
NM_001204751.1	410767	-	3811	94.9315	25.4995	1.89642	5e-05	0.000627385
NM_001205223.1	410681	-	2006	65.0303	22.8933	1.50619	5e-05	0.000627385
NM_001206973.1	552475	-	2299	1.20499	16.6829	-3.79128	5e-05	0.000627385
NM_001220486.1	408606	-	2644	49.5793	25.2323	0.974468	5e-05	0.000627385
NM_001220487.1	724541	-	2747	2.3162	0.678753	1.7708	5e-05	0.000627385
NM_001242387.1	409697	-	7404	77.7117	39.7238	0.968127	5e-05	0.000627385
NM_001242432.1	411132	-	2025	1.13938	9.6725	-3.08564	5e-05	0.000627385
NM_001242436.1	551853	-	2835	77.2133	54.5872	0.500286	0.00075	0.00723644
NM_001242456.1	724805	-	2760	37.0648	10.043	1.88386	5e-05	0.000627385
NM_001242457.1	552415	-	534	122.194	175.771	-0.524519	0.0009	0.00850416
NM_001242458.1	552378	-	3603	106.141	54.9433	0.949965	5e-05	0.000627385
NM_001242468.1	552646	-	2560	13.0384	19.6252	-0.589939	0.00075	0.00723644
NM_001242470.1	100576395	-	1328	88.6894	63.9877	0.470967	0.00135	0.0120939
NM_001242513.1	408654	-	1262	148.35	71.2316	1.05842	5e-05	0.000627385
NM_001242514.1	724675	-	1794	73.5066	43.8035	0.746827	5e-05	0.000627385
NM_001242515.1	411112	-	3236	62.2592	25.2473	1.30216	5e-05	0.000627385
NM_001242517.1	100578127	-	2332	60.4053	19.2858	1.64713	5e-05	0.000627385
NM_001242518.1	100578262	-	5170	81.2894	35.4596	1.19689	5e-05	0.000627385
NM_001242519.1	551971	-	1742	262.232	107.319	1.28894	5e-05	0.000627385
NM_001242520.1	552351	-	1211	139.328	102.385	0.444479	0.0012	0.01092
NM_001242523.1	726770	-	2180	66.8272	28.9753	1.20561	5e-05	0.000627385
NM_001242526.1	725187	-	2004	33.5419	46.0182	-0.456238	0.0019	0.0162503
NM_001242542.1	100578252	-	1798	31.8067	9.35376	1.76571	5e-05	0.000627385
NM_001242554.1	409940	-	1844	86.7248	25.4869	1.76669	5e-05	0.000627385
NM_001242555.1	724534	-	2074	18.2374	25.5969	-0.489068	0.00205	0.0173499
NM_001242557.1	724300	-	1848	0.693011	5.26853	-2.92645	5e-05	0.000627385
NM_001242574.1	551828	-	7047	121.404	33.9068	1.84016	5e-05	0.000627385
NM_001242576.1	726880	-	2236	4.54205	27.2777	-2.58631	5e-05	0.000627385
NM_001242579.1	551434	-	1703	24.3421	6.4234	1.92204	5e-05	0.000627385
NM_001242656.1	409148	-	1314	738.796	425.444	0.796208	5e-05	0.000627385
NM_001242971.1	100577714	-	1446	0.2396	1.24549	-2.37801	0.00225	0.0188021
NM_001242977.1	100642170	-	1221	0.311448	1.30657	-2.06872	0.0011	0.0101285
NM_001242998.1	411317	-	1492	0.958909	2.39348	-1.31964	5e-05	0.000627385
NM_001242999.1	100642173	-	2663	26.2706	11.8071	1.15379	5e-05	0.000627385
NM_001252019.1	100820634	-	6272	29.4135	7.11064	2.04842	5e-05	0.000627385
NM_001252428.1	724845	-	1113	164.907	5.83642	4.82042	5e-05	0.000627385
NM_001252430.1	726676	-	1077	1792.92	37.7154	5.57102	5e-05	0.000627385
NM_001256034.1	724978	-	7378	96.0685	30.396	1.66018	5e-05	0.000627385
NM_001256035.1	724290	-	4039	31.7942	21.2922	0.578439	5e-05	0.000627385
NM_001256037.1	727274	-	10767	88.7027	41.2933	1.10307	5e-05	0.000627385
NM_001265585.1	725195	-	1302	36.5366	13.0968	1.48013	0.00385	0.0297521
NM_001270820.1	727204	-	885	28.7973	14.1359	1.02657	5e-05	0.000627385
NM_001270825.1	725300	-	865	19.1867	4.69915	2.02964	5e-05	0.000627385
NM_001270827.1	724556	-	1201	0.115936	1.76095	-3.92495	0.0003	0.00321156
NM_001270831.1	726632	-	750	1.41082	8.073	-2.51657	5e-05	0.000627385
NM_001270832.1	726691	-	765	1.16896	3.98053	-1.76773	0.00115	0.0105259
NM_001270833.1	726691	-	606	1.65269	6.02307	-1.86569	0.00105	0.00971924
NM_001277300.1	552738	-	1952	19.5365	9.7286	1.00586	0.004	0.0307319
NM_001277301.1	408316	-	7230	19.9625	10.6117	0.911641	5e-05	0.000627385
NM_001278327.1	552826	-	2360	65.3057	22.8324	1.51613	5e-05	0.000627385
NM_001278328.1	551635	-	1954	24.5961	36.5083	-0.569795	0.0008	0.00765733
NM_001278330.1	726003	-	3412	49.4633	32.8343	0.591156	5e-05	0.000627385
NM_001278331.1	412643	-	6993	52.0814	18.3707	1.50336	5e-05	0.000627385
NM_001278332.1	551304	-	505	18.0395	35.4974	-0.976554	5e-05	0.000627385
NM_001278333.1	100577883	-	1214	6.70308	11.8154	-0.81777	0.0007	0.006805
NM_001278336.1	551420	-	2762	35.0131	18.3634	0.93106	5e-05	0.000627385
NM_001278338.1	100576447	-	2410	0.376764	1.51483	-2.00742	5e-05	0.000627385
NM_001278705.1	552716	-	1379	14.5364	24.0272	-0.724999	5e-05	0.000627385
NM_001278706.1	725821	-	1900	205.816	16.104	3.67586	5e-05	0.000627385
TCONS_00001383	XLOC_000572	-	1498	0.15162	1.51864	-3.32425	5e-05	0.000627385
TCONS_00005539	XLOC_001987	-	1407	0.171085	0.672675	-1.9752	0.00285	0.0230215
TCONS_00006713	XLOC_002450	-	2712	23.4256	3.99631	2.55135	5e-05	0.000627385
TCONS_00006720	XLOC_002453	-	3177	21.8157	3.65383	2.57789	5e-05	0.000627385
TCONS_00006927	XLOC_002453	-	532	73.4032	13.9368	2.39694	5e-05	0.000627385
TCONS_00006930	XLOC_002460	-	717	11.018	0.996241	3.46722	5e-05	0.000627385
TCONS_00006938	XLOC_002497	-	2194	6.63035	0.523593	3.66257	0.00345	0.0271031
TCONS_00007109	XLOC_002497	-	2369	13.9918	1.05961	3.72298	5e-05	0.000627385
TCONS_00007151	XLOC_002368	-	367	144.589	61.425	1.23506	5e-05	0.000627385
TCONS_00007175	XLOC_002427	-	1193	39.6888	2.55385	3.95799	5e-05	0.000627385
TCONS_00007231	XLOC_002427	-	3348	8.32106	0.450142	4.20832	0.0001	0.00119145
TCONS_00007357	XLOC_002606	-	614	0.400057	1.54358	-1.948	0.00585	0.0424518
TCONS_00007702	XLOC_002621	-	957	2.35679	13.8688	-2.55694	0.00665	0.0472359
TCONS_00008562	XLOC_003087	-	1390	0.430397	3.14775	-2.87058	0.00635	0.0454629
TCONS_00008667	XLOC_003087	-	2569	0.449821	4.55453	-3.33988	5e-05	0.000627385
TCONS_00008788	XLOC_003087	-	2229	0.216778	4.37806	-4.336	0.0001	0.00119145
TCONS_00009866	XLOC_003463	-	695	62.126	25.6786	1.27463	5e-05	0.000627385
TCONS_00010427	XLOC_003544	-	5229	1.21975	3.09221	-1.34206	5e-05	0.000627385
TCONS_00010439	XLOC_003502	-	2900	21.0898	12.4315	0.762548	0.0004	0.00415277
TCONS_00010505	XLOC_003544	-	5211	1.84404	3.44097	-0.899942	0.00125	0.0113133
TCONS_00011255	XLOC_003784	-	5765	16.4822	2.86409	2.52476	5e-05	0.000627385
TCONS_00011538	XLOC_003784	-	4192	20.7959	7.51946	1.4676	5e-05	0.000627385
TCONS_00011556	XLOC_003839	-	1853	30.4266	8.50886	1.8383	5e-05	0.000627385
TCONS_00011579	XLOC_003784	-	10016	23.7225	6.40946	1.88798	5e-05	0.000627385
TCONS_00013355	XLOC_004589	-	2210	3.78504	5.9439	-0.651099	0.00305	0.0243978
TCONS_00013441	XLOC_004524	-	1241	2.77777	5.82122	-1.06739	0.00015	0.00171726
TCONS_00015100	XLOC_005159	-	1214	19.7775	4.12664	2.26082	5e-05	0.000627385
TCONS_00015103	XLOC_005159	-	1061	8.04098	1.27206	2.66021	0.0071	0.0499217
TCONS_00015123	XLOC_005189	-	2175	8.04043	2.64792	1.60241	0.0039	0.0300614
TCONS_00015234	XLOC_005188	-	1718	18.9594	3.30201	2.5215	5e-05	0.000627385
TCONS_00015388	XLOC_005207	-	958	6.88067	3.03633	1.18022	0.002	0.0169774
TCONS_00015403	XLOC_005159	-	1599	5.35774	1.2131	2.14292	0.0059	0.0427402
TCONS_00016268	XLOC_005559	-	1013	0.522915	2.40964	-2.20417	0.0001	0.00119145
TCONS_00016456	XLOC_005586	-	1181	0.978946	2.14469	-1.13147	0.00225	0.0188021
TCONS_00018424	XLOC_006161	-	1643	18.987	2.0509	3.21068	5e-05	0.000627385
TCONS_00018569	XLOC_006161	-	1720	3.53614	0.384174	3.20235	0.00125	0.0113133
TCONS_00019288	XLOC_006538	-	4005	0.0622491	0.833045	-3.74227	5e-05	0.000627385
TCONS_00019757	XLOC_006610	-	1603	22.1563	8.82899	1.32739	5e-05	0.000627385
TCONS_00019785	XLOC_006641	-	4246	13.6701	7.5744	0.851817	5e-05	0.000627385
TCONS_00019887	XLOC_006685	-	1552	19.5162	5.46426	1.83657	5e-05	0.000627385
TCONS_00020034	XLOC_006751	-	1801	0.722967	2.76006	-1.9327	5e-05	0.000627385
TCONS_00020089	XLOC_006726	-	492	4.17589	12.7323	-1.60834	5e-05	0.000627385
TCONS_00021405	XLOC_007220	-	586	5.08288	1.23526	2.04083	5e-05	0.000627385
TCONS_00021822	XLOC_007324	-	1611	0.130155	1.86891	-3.84389	5e-05	0.000627385
TCONS_00021977	XLOC_007433	-	1056	0.166588	0.674743	-2.01806	0.0054	0.0396288
TCONS_00022155	XLOC_007421	-	2643	1.38447	2.78286	-1.00723	0.0001	0.00119145
TCONS_00022188	XLOC_007470	-	1902	3.94191	7.64846	-0.956273	0.0041	0.0313827
TCONS_00022532	XLOC_007680	-	606	61.0142	24.5438	1.31378	5e-05	0.000627385
TCONS_00022701	XLOC_007608	-	1518	43.1551	21.1539	1.02861	5e-05	0.000627385
TCONS_00023254	XLOC_007885	-	4381	55.288	7.06404	2.9684	5e-05	0.000627385
TCONS_00023255	XLOC_007885	-	1132	258.358	17.3112	3.8996	5e-05	0.000627385
TCONS_00023299	XLOC_007885	-	4769	51.7128	16.6164	1.63791	5e-05	0.000627385
TCONS_00023391	XLOC_007885	-	3741	17.2008	1.12076	3.93993	0.006	0.0433426
TCONS_00024265	XLOC_008174	-	3931	0.770687	2.88199	-1.90285	5e-05	0.000627385
TCONS_00024985	XLOC_008468	-	604	3.97238	9.75029	-1.29544	0.00015	0.00171726
TCONS_00025103	XLOC_008534	-	800	0.637206	1.65503	-1.37703	0.00415	0.0316952
TCONS_00025570	XLOC_008759	-	2069	18.1343	8.60896	1.07481	0.00425	0.0323387
TCONS_00025571	XLOC_008759	-	2929	10.1219	18.9148	-0.902029	0.00045	0.00460371
TCONS_00025698	XLOC_008682	-	471	8.07322	1.28724	2.64887	5e-05	0.000627385
TCONS_00026947	XLOC_009140	-	3252	0.224707	0.958301	-2.09243	5e-05	0.000627385
TCONS_00026988	XLOC_009146	-	1457	0.867113	3.32657	-1.93974	5e-05	0.000627385
TCONS_00027168	XLOC_009146	-	2867	2.50331	6.87186	-1.45686	0.0007	0.006805
TCONS_00027416	XLOC_009208	-	656	0.698118	2.71829	-1.96116	0.00035	0.00368417
TCONS_00027458	XLOC_009275	-	665	23.8082	7.99617	1.57408	5e-05	0.000627385
TCONS_00029754	XLOC_010015	-	577	50.0161	90.9323	-0.862402	5e-05	0.000627385
TCONS_00030199	XLOC_010128	-	1502	0.48449	2.07313	-2.09727	5e-05	0.000627385
TCONS_00030846	XLOC_010265	-	1719	0.873009	6.01699	-2.78497	5e-05	0.000627385
TCONS_00032354	XLOC_010780	-	2258	5.9232	1.70527	1.79638	5e-05	0.000627385
TCONS_00032482	XLOC_010781	-	1293	14.3186	3.49393	2.03497	5e-05	0.000627385
TCONS_00032647	XLOC_010859	-	1130	0.665926	1.9479	-1.54849	0.00035	0.00368417
TCONS_00034132	XLOC_011312	-	1029	0.11561	2.61737	-4.50078	0.00195	0.0166197
TCONS_00034249	XLOC_011364	-	1117	20.4467	86.7372	-2.08478	5e-05	0.000627385
TCONS_00035219	XLOC_011712	-	760	73.2789	30.2701	1.2755	5e-05	0.000627385
TCONS_00035264	XLOC_011704	-	8121	14.913	6.97124	1.09709	5e-05	0.000627385
TCONS_00035271	XLOC_011712	-	2644	41.904	11.7761	1.83123	5e-05	0.000627385
TCONS_00035652	XLOC_011775	-	3447	17.0669	8.92178	0.935801	0.0008	0.00765733
TCONS_00036239	XLOC_012009	-	1321	1.50168	4.75467	-1.66277	0.00045	0.00460371
TCONS_00036963	XLOC_012242	-	1281	0.286036	1.10256	-1.94658	0.00045	0.00460371
TCONS_00037490	XLOC_012374	-	1052	0.170079	1.23812	-2.86387	0.001	0.00932037
TCONS_00038697	XLOC_012807	-	4050	3.55044	7.06848	-0.993404	5e-05	0.000627385
TCONS_00038858	XLOC_012807	-	4343	2.01049	4.03653	-1.00557	0.0004	0.00415277
TCONS_00039451	XLOC_012990	-	2907	22.3404	6.25849	1.83577	5e-05	0.000627385
TCONS_00039471	XLOC_012992	-	6035	8.56107	1.46247	2.54939	5e-05	0.000627385
TCONS_00039472	XLOC_012992	-	6317	8.19732	1.81195	2.17761	5e-05	0.000627385
TCONS_00039592	XLOC_013009	-	1426	0.766028	2.15906	-1.49493	0.00295	0.0237238
TCONS_00039596	XLOC_013010	-	774	3.65056	7.59865	-1.05763	0.0004	0.00415277
TCONS_00039743	XLOC_013075	-	604	36.1009	7.9605	2.1811	5e-05	0.000627385
TCONS_00039889	XLOC_013112	-	466	5.32086	16.618	-1.64302	5e-05	0.000627385
TCONS_00040206	XLOC_013229	-	855	0.256773	1.13731	-2.14706	0.003	0.0240508
TCONS_00040421	XLOC_013287	-	1433	3.60663	7.12724	-0.982693	0.0004	0.00415277
TCONS_00041440	XLOC_013639	-	854	23.6781	11.361	1.05946	5e-05	0.000627385
TCONS_00041730	XLOC_013725	-	1084	135.647	64.4905	1.0727	5e-05	0.000627385
TCONS_00041970	XLOC_013817	-	1420	0.5455	1.86541	-1.77384	0.0032	0.0254182
TCONS_00042467	XLOC_013964	-	908	13.2179	5.00247	1.40178	5e-05	0.000627385
TCONS_00043495	XLOC_014309	-	1545	0.452205	1.41152	-1.6422	0.00015	0.00171726
TCONS_00043771	XLOC_014423	-	343	0	1.8319	#NAME?	5e-05	0.000627385
TCONS_00044539	XLOC_014674	-	1546	1.82556	13.2745	-2.86225	5e-05	0.000627385
TCONS_00044577	XLOC_014674	-	1287	3.00029	7.84333	-1.38636	0.00045	0.00460371
TCONS_00044598	XLOC_014674	-	1214	2.42991	6.91614	-1.50907	0.0023	0.01916
TCONS_00044599	XLOC_014677	-	3202	1.84043	4.53157	-1.29997	5e-05	0.000627385
TCONS_00044858	XLOC_014763	-	729	5.57675	11.6807	-1.06663	0.0001	0.00119145
TCONS_00044944	XLOC_014781	-	860	3.81019	23.3163	-2.6134	0.00055	0.00549577
TCONS_00045276	XLOC_014904	-	2766	6.72364	1.02773	2.70978	5e-05	0.000627385
TCONS_00045326	XLOC_014892	-	9829	11.247	4.1671	1.43243	5e-05	0.000627385
TCONS_00045360	XLOC_014892	-	8227	4.33019	1.05344	2.03932	0.00015	0.00171726
TCONS_00046017	XLOC_015137	-	3759	0.175831	0.819318	-2.22023	5e-05	0.000627385
TCONS_00047087	XLOC_015301	-	347	49.5205	512.688	-3.37198	5e-05	0.000627385
TCONS_00048483	XLOC_015679	-	2630	0.310899	1.40586	-2.17694	5e-05	0.000627385
TCONS_00049161	XLOC_015872	-	530	1.86329	6.43859	-1.78889	5e-05	0.000627385
TCONS_00050838	XLOC_016234	-	4262	0.583624	1.05335	-0.851875	0.00415	0.0316952
TCONS_00051744	XLOC_016491	-	1161	6.7554	2.36076	1.51679	0.00245	0.0202465
TCONS_00052730	XLOC_016715	-	399	0	0.717727	#NAME?	0.0062	0.0445376
TCONS_00054085	XLOC_017135	-	307	2.48771	0	inf	5e-05	0.000627385
TCONS_00054153	XLOC_017148	-	3101	0.210632	1.21716	-2.53072	0.00085	0.00808185
TCONS_00054914	XLOC_017414	-	1280	0.668879	2.95631	-2.14398	5e-05	0.000627385
TCONS_00054979	XLOC_017429	-	1336	0.525242	1.28413	-1.28973	0.00235	0.0195215
TCONS_00055315	XLOC_017548	-	925	1.33068	2.68289	-1.01163	0.00675	0.0478144
TCONS_00055920	XLOC_017718	-	1034	28.8026	7.84653	1.87607	5e-05	0.000627385
TCONS_00055967	XLOC_017742	-	2721	16.9927	33.9208	-0.997251	5e-05	0.000627385
TCONS_00055983	XLOC_017736	-	436	10.3096	35.3984	-1.7797	5e-05	0.000627385
TCONS_00056249	XLOC_017820	-	2719	1.01525	0.41188	1.30155	0.00045	0.00460371
TCONS_00057792	XLOC_018203	-	2049	0.397751	1.32723	-1.73848	0.0016	0.0140101
TCONS_00057854	XLOC_018210	-	3698	0.16734	0.651584	-1.96116	0.00395	0.0303824
TCONS_00058860	XLOC_018457	-	738	2.16767	15.3832	-2.82714	5e-05	0.000627385
TCONS_00059932	XLOC_018783	-	493	9.15346	4.48764	1.02836	0.00575	0.0418311
TCONS_00060991	XLOC_019104	-	937	0.27951	1.67898	-2.58661	0.00045	0.00460371
TCONS_00061135	XLOC_019167	-	3986	5.29643	3.18547	0.733514	0.00085	0.00808185
TCONS_00063172	XLOC_019801	-	2456	0.759961	0.142475	2.41522	0.00145	0.0128782
TCONS_00063173	XLOC_019801	-	2477	2.41313	0.275883	3.12878	5e-05	0.000627385
TCONS_00064016	XLOC_020048	-	2084	0.144176	0.595779	-2.04694	0.0005	0.00505175
TCONS_00064141	XLOC_020105	-	614	0.367565	1.52472	-2.05248	0.00655	0.0466543
TCONS_00064514	XLOC_020224	-	412	37.5405	17.4167	1.10798	5e-05	0.000627385
TCONS_00064845	XLOC_020324	-	4252	0.105291	0.486819	-2.209	5e-05	0.000627385
TCONS_00065927	XLOC_020686	-	1324	0.286742	3.31082	-3.52936	0.00035	0.00368417
TCONS_00066205	XLOC_020764	-	1043	0.212094	1.14061	-2.42702	0.00125	0.0113133
TCONS_00067839	XLOC_021314	-	1456	0.142299	1.71902	-3.5946	0.00025	0.00272364
TCONS_00072528	XLOC_022794	-	384	33.69	13.5495	1.31408	5e-05	0.000627385
TCONS_00072915	XLOC_022921	-	469	0	1.5116	#NAME?	5e-05	0.000627385
TCONS_00073550	XLOC_023135	-	2330	0.155579	1.86377	-3.58251	5e-05	0.000627385
TCONS_00073775	XLOC_023174	-	495	3.17938	0.314216	3.33892	0.00375	0.0290952
TCONS_00074282	XLOC_023295	-	2368	0.057845	0.849134	-3.87573	0.001	0.00932037
TCONS_00074612	XLOC_023403	-	212	0	23.5694	#NAME?	0.00025	0.00272364
TCONS_00075881	XLOC_023747	-	1305	12.0785	7.72546	0.644747	0.0053	0.0390122
TCONS_00076141	XLOC_023848	-	1142	0.517555	1.22682	-1.24514	0.0046	0.0345967
TCONS_00076655	XLOC_024003	-	2051	0.239884	0.574958	-1.26112	0.00535	0.039323
TCONS_00076946	XLOC_024066	-	1156	4.19013	1.43514	1.5458	5e-05	0.000627385
TCONS_00082259	XLOC_026460	-	2848	2.11073	11.8734	-2.49192	5e-05	0.000627385
TCONS_00083227	XLOC_028100	-	747	0.442868	3.5913	-3.01956	0.0001	0.00119145
TCONS_00083570	XLOC_028670	-	841	50.5747	16.9477	1.57733	5e-05	0.000627385
TCONS_00083686	XLOC_028796	-	1430	1.97373	7.04854	-1.8364	5e-05	0.000627385
TCONS_00084002	XLOC_029333	-	3062	368.479	15.4197	4.57874	5e-05	0.000627385
TCONS_00084038	XLOC_029395	-	1195	6.59339	3.34564	0.978738	0.00045	0.00460371
TCONS_00084730	XLOC_029952	-	469	1.29253	7.76129	-2.5861	0.00465	0.0349042
TCONS_00085346	XLOC_030915	-	1664	5.79591	2.7297	1.08629	0.00215	0.0180806
TCONS_00085582	XLOC_031280	-	1046	2.34733	7.04483	-1.58555	5e-05	0.000627385
TCONS_00087266	XLOC_034064	-	986	0.748362	8.46499	-3.4997	0.0004	0.00415277
TCONS_00091209	XLOC_040089	-	3491	3.0169	0.874565	1.78643	5e-05	0.000627385
TCONS_00091433	XLOC_040419	-	2677	0.47985	1.42447	-1.56977	0.00015	0.00171726
TCONS_00091817	XLOC_041105	-	1337	0.165761	1.29185	-2.96226	0.00045	0.00460371
TCONS_00092279	XLOC_042469	-	2049	3.98084	2.29345	0.795557	0.0019	0.0162503
TCONS_00092686	XLOC_042949	-	1527	8.10797	22.7996	-1.4916	5e-05	0.000627385
TCONS_00093472	XLOC_043789	-	3272	0.26716	1.66551	-2.64019	0.00015	0.00171726
TCONS_00095530	XLOC_047129	-	1152	0.830279	4.19336	-2.33644	5e-05	0.000627385
TCONS_00099452	XLOC_027463	-	925	4.36073	2.14388	1.02435	0.0043	0.0326437
TCONS_00101640	XLOC_031366	-	1133	1.09553	2.47461	-1.17558	0.00155	0.0136406
TCONS_00102404	XLOC_032886	-	2038	20.1056	35.7642	-0.830917	0.00045	0.00460371
TCONS_00102786	XLOC_033427	-	1169	3.22186	13.9288	-2.1121	0.0054	0.0396288
TCONS_00106800	XLOC_041005	-	796	0.267865	1.79732	-2.74627	0.0008	0.00765733
TCONS_00108601	XLOC_044623	-	2312	8.30719	1.14404	2.86022	0.00025	0.00272364
TCONS_00109629	XLOC_046621	-	2823	39.1329	19.263	1.02255	5e-05	0.000627385
TCONS_00114890	XLOC_029883	-	609	0.676106	2.13658	-1.65998	0.00365	0.0284205
TCONS_00115280	XLOC_030874	-	658	0.214657	1.83001	-3.09174	0.0036	0.0280992
TCONS_00115369	XLOC_031187	-	921	6.93703	2.64096	1.39325	0.00275	0.0223437
TCONS_00115590	XLOC_031832	-	2840	1.23455	8.72205	-2.82069	5e-05	0.000627385
TCONS_00115986	XLOC_032886	-	2273	2.73947	10.4584	-1.93269	0.0037	0.0287608
TCONS_00119397	XLOC_040436	-	1005	1.36846	2.98484	-1.1251	0.0016	0.0140101
TCONS_00119864	XLOC_041709	-	2351	0.194706	2.70883	-3.7983	0.001	0.00932037
TCONS_00120361	XLOC_043372	-	682	7.89307	19.3263	-1.29191	5e-05	0.000627385
TCONS_00121686	XLOC_046533	-	1551	0.470623	7.22879	-3.94111	5e-05	0.000627385
TCONS_00121958	XLOC_047038	-	5022	1.6844	3.80012	-1.17381	5e-05	0.000627385
TCONS_00122151	XLOC_047344	-	2414	10.6738	5.60768	0.928594	5e-05	0.000627385
TCONS_00125667	XLOC_029333	-	2830	90.2773	2.96473	4.92839	5e-05	0.000627385
TCONS_00128496	XLOC_035722	-	426	8.14018	25.5525	-1.65033	0.0005	0.00505175
TCONS_00129473	XLOC_038929	-	618	0.340218	2.73682	-3.00797	0.00625	0.0448285
TCONS_00130500	XLOC_041604	-	3651	4.95256	8.94644	-0.853139	5e-05	0.000627385
TCONS_00132510	XLOC_047141	-	398	1.92935	8.92164	-2.20919	0.00395	0.0303824
TCONS_00137389	XLOC_033352	-	4370	1.76499	10.1197	-2.51943	5e-05	0.000627385
TCONS_00141252	XLOC_043332	-	1044	0.300455	1.7045	-2.50413	0.0002	0.00222634
TCONS_00142152	XLOC_045641	-	1327	5.12068	1.31878	1.95713	0.00255	0.0209604
TCONS_00145489	XLOC_026957	-	1570	30.3492	7.14037	2.08759	5e-05	0.000627385
TCONS_00146779	XLOC_030873	-	2270	0.0665736	0.711079	-3.41699	0.0002	0.00222634
TCONS_00151838	XLOC_046830	-	990	1.56922	12.6957	-3.01622	0.0042	0.0320253
TCONS_00153682	XLOC_026155	-	1476	1.0816	4.46263	-2.04473	0.00305	0.0243978
TCONS_00155894	XLOC_033352	-	3380	7.13687	19.7878	-1.47125	0.00565	0.0412009
TCONS_00158095	XLOC_040060	-	468	1.52077	9.59792	-2.65792	5e-05	0.000627385
TCONS_00164029	XLOC_031833	-	1318	1.40584	12.9733	-3.20604	5e-05	0.000627385
TCONS_00164461	XLOC_033383	-	9721	2.66039	10.0694	-1.92026	0.0001	0.00119145
TCONS_00164872	XLOC_034612	-	478	104.69	56.2697	0.895695	5e-05	0.000627385
TCONS_00168812	XLOC_047473	-	8349	0.163747	0.471075	-1.52449	0.00015	0.00171726
TCONS_00171798	XLOC_030218	-	1136	9.15623	21.9158	-1.25915	5e-05	0.000627385
TCONS_00171970	XLOC_030956	-	811	0.204358	1.19958	-2.55335	0.0033	0.0260853
TCONS_00176714	XLOC_046830	-	3158	1.15304	4.91551	-2.0919	5e-05	0.000627385
TCONS_00176718	XLOC_046844	-	4532	1.92536	4.11353	-1.09525	5e-05	0.000627385
TCONS_00179176	XLOC_026617	-	816	7.31786	3.79671	0.946672	0.00185	0.0158744
TCONS_00179279	XLOC_026777	-	4102	0.137433	0.568836	-2.04929	0.0002	0.00222634
TCONS_00179546	XLOC_027838	-	589	0.114162	5.31468	-5.54082	0.00265	0.0216517
TCONS_00179552	XLOC_027838	-	3158	1.95388	3.25216	-0.735055	0.0039	0.0300614
TCONS_00179609	XLOC_028047	-	1020	0	0.621155	#NAME?	5e-05	0.000627385
TCONS_00180186	XLOC_029703	-	1252	0.936371	11.0404	-3.55957	0.00025	0.00272364
TCONS_00183086	XLOC_038197	-	1554	0.105322	1.16836	-3.4716	0.00025	0.00272364
TCONS_00185023	XLOC_043534	-	753	0.547828	3.38107	-2.62568	5e-05	0.000627385
TCONS_00185366	XLOC_044422	-	4284	0.153566	1.54602	-3.33163	5e-05	0.000627385
TCONS_00186039	XLOC_046621	-	1126	61.5132	11.2858	2.44638	0.0016	0.0140101
TCONS_00186528	XLOC_047901	-	793	96.4546	201.469	-1.06264	0.0025	0.020608
TCONS_00187212	XLOC_050677	-	1290	9.87636	4.62149	1.09562	5e-05	0.000627385
TCONS_00188607	XLOC_027378	-	408	1.33237	5.49597	-2.04437	0.001	0.00932037
TCONS_00188763	XLOC_027715	-	1446	0.23723	1.3812	-2.54156	0.0024	0.0198832
TCONS_00188917	XLOC_028107	-	1978	0.318045	1.22151	-1.94136	0.00335	0.026426
TCONS_00189278	XLOC_029395	-	1057	0.572908	2.51431	-2.13379	0.00375	0.0290952
TCONS_00190649	XLOC_033436	-	15108	0.694896	2.21264	-1.6709	5e-05	0.000627385
TCONS_00192958	XLOC_040389	-	3652	0.0612787	0.957737	-3.96617	5e-05	0.000627385
TCONS_00192962	XLOC_040397	-	1769	0.291242	0.942769	-1.69469	0.00035	0.00368417
TCONS_00193971	XLOC_043777	-	630	0.599031	2.16692	-1.85494	0.00165	0.0143795
TCONS_00193979	XLOC_043789	-	2603	0.479069	1.6373	-1.77301	0.00025	0.00272364
TCONS_00197212	XLOC_027047	-	1607	0.25305	0.790153	-1.64271	0.0015	0.0132566
TCONS_00199406	XLOC_034065	-	3429	0.439919	0.898853	-1.03085	0.00205	0.0173499
TCONS_00201655	XLOC_039977	-	1790	0.183552	0.719626	-1.97106	0.00055	0.00549577
TCONS_00201795	XLOC_040382	-	990	0.599901	2.26028	-1.9137	0.0001	0.00119145
TCONS_00201834	XLOC_040511	-	2514	0.264755	0.616636	-1.21976	0.003	0.0240508
TCONS_00202807	XLOC_043979	-	2010	0.173479	1.22198	-2.81639	0.00145	0.0128782
TCONS_00202853	XLOC_044088	-	544	1.00104	18.3184	-4.19372	5e-05	0.000627385
TCONS_00206437	XLOC_058762	-	2591	15.8754	5.11243	1.63471	0.0012	0.01092
TCONS_00208040	XLOC_061121	-	1693	3.65139	1.2912	1.49973	0.00035	0.00368417
TCONS_00209871	XLOC_063769	-	13017	0.817917	1.64246	-1.00584	5e-05	0.000627385
TCONS_00209896	XLOC_063783	-	1240	3.1045	9.47269	-1.60941	5e-05	0.000627385
TCONS_00210597	XLOC_064321	-	680	2.97767	6.72791	-1.17597	0.00035	0.00368417
TCONS_00210684	XLOC_064401	-	4654	5.65299	8.34401	-0.561726	0.0021	0.0177095
TCONS_00210975	XLOC_064767	-	1069	4.25288	8.5261	-1.00344	0.0001	0.00119145
TCONS_00211244	XLOC_065090	-	8475	1.43305	3.07011	-1.09919	0.0001	0.00119145
TCONS_00211882	XLOC_066201	-	643	378.062	190.075	0.992055	5e-05	0.000627385
TCONS_00212587	XLOC_067326	-	3624	0.232469	2.32861	-3.32436	5e-05	0.000627385
TCONS_00212736	XLOC_067450	-	6570	2.00914	4.3666	-1.11993	5e-05	0.000627385
TCONS_00212852	XLOC_067709	-	2746	4.65355	1.2838	1.85791	0.00035	0.00368417
TCONS_00213015	XLOC_068012	-	3523	2.92164	0.878493	1.73367	5e-05	0.000627385
TCONS_00214267	XLOC_059509	-	4631	4.59377	11.6122	-1.33789	0.0034	0.0267578
TCONS_00215131	XLOC_060870	-	1882	7.48559	1.80084	2.05544	0.006	0.0433426
TCONS_00215202	XLOC_061008	-	689	2.42775	6.57832	-1.4381	0.00245	0.0202465
TCONS_00217076	XLOC_063863	-	8993	0.8396	0.283526	1.56622	0.00615	0.0442345
TCONS_00218039	XLOC_064996	-	3110	0.518071	0.165348	1.64765	0.00185	0.0158744
TCONS_00220311	XLOC_058429	-	1693	0.713564	3.38112	-2.24439	5e-05	0.000627385
TCONS_00220550	XLOC_059181	-	5638	1.80935	3.97989	-1.13726	0.0001	0.00119145
TCONS_00220728	XLOC_059509	-	15061	7.08428	11.1831	-0.658621	0.0008	0.00765733
TCONS_00221001	XLOC_059899	-	1724	2.99545	4.75088	-0.665419	0.0063	0.0451529
TCONS_00221548	XLOC_061255	-	457	15.8243	30.8471	-0.962993	0.00035	0.00368417
TCONS_00221575	XLOC_061285	-	1402	21.2912	6.92964	1.61941	0.0007	0.006805
TCONS_00224227	XLOC_066514	-	595	1.55665	5.33948	-1.77826	0.0014	0.0124897
TCONS_00227426	XLOC_063647	-	2339	2.00038	4.28908	-1.10039	0.0003	0.00321156
TCONS_00230158	XLOC_059227	-	483	0.718486	2.81886	-1.97208	0.00365	0.0284205
TCONS_00232627	XLOC_064368	-	1083	1.39785	12.757	-3.19001	0.0002	0.00222634
TCONS_00235363	XLOC_060950	-	766	0.291824	1.82902	-2.6479	0.0015	0.0132566
TCONS_00240912	XLOC_064964	-	2367	16.364	8.6281	0.923412	5e-05	0.000627385
TCONS_00243994	XLOC_063419	-	7161	1.52096	4.25785	-1.48515	0.0011	0.0101285
TCONS_00244338	XLOC_064101	-	539	12.7304	25.1961	-0.984919	0.0002	0.00222634
TCONS_00247920	XLOC_063419	-	3963	2.53495	10.6983	-2.07735	5e-05	0.000627385
TCONS_00251378	XLOC_062235	-	1005	1.64671	3.85614	-1.22757	0.00265	0.0216517
TCONS_00251642	XLOC_062824	-	1079	27.0575	6.38104	2.08416	5e-05	0.000627385
TCONS_00251966	XLOC_063655	-	2762	0.135108	0.480148	-1.82936	0.00045	0.00460371
TCONS_00252126	XLOC_063863	-	3830	2.88086	1.16659	1.3042	0.00145	0.0128782
TCONS_00252138	XLOC_063871	-	5769	0.994964	2.29985	-1.20882	5e-05	0.000627385
TCONS_00252173	XLOC_063920	-	2268	0.161414	1.56164	-3.27423	0.0023	0.01916
TCONS_00252984	XLOC_066039	-	2322	0.0981054	0.983766	-3.32591	0.0022	0.0184409
TCONS_00253035	XLOC_066260	-	2750	0.0915685	0.647756	-2.82253	0.0016	0.0140101
TCONS_00253040	XLOC_066264	-	2261	0.226679	1.19222	-2.39493	0.0059	0.0427402
TCONS_00254270	XLOC_059084	-	2883	0.985841	3.67043	-1.89652	0.00065	0.00638377
TCONS_00255177	XLOC_062220	-	1790	2.96378	5.93691	-1.00228	5e-05	0.000627385
TCONS_00255730	XLOC_063655	-	3567	0.251467	1.08288	-2.10643	5e-05	0.000627385
TCONS_00258078	XLOC_059568	-	7495	0.0643031	0.912273	-3.82651	5e-05	0.000627385
TCONS_00258707	XLOC_061295	-	1155	8.89036	2.18809	2.02257	0.0066	0.0469443
TCONS_00259841	XLOC_063865	-	11127	0.196544	0.414001	-1.07478	0.00315	0.025083
TCONS_00260006	XLOC_064266	-	2413	0.259529	0.624881	-1.26768	0.005	0.037132
TCONS_00261113	XLOC_067709	-	1348	7.7671	2.37156	1.71154	0.00145	0.0128782
TCONS_00261644	XLOC_070004	-	2042	0.20822	1.00392	-2.26946	5e-05	0.000627385
TCONS_00262372	XLOC_071282	-	1210	0.159785	1.95697	-3.61442	5e-05	0.000627385
TCONS_00262380	XLOC_071285	-	1175	0.346223	4.94126	-3.8351	5e-05	0.000627385
TCONS_00262915	XLOC_072228	-	347	10.3318	26.1437	-1.33937	0.0001	0.00119145
TCONS_00263929	XLOC_073978	-	2485	1.08838	13.6165	-3.6451	5e-05	0.000627385
TCONS_00264124	XLOC_074249	-	733	0.196457	2.47321	-3.6541	0.0019	0.0162503
TCONS_00264477	XLOC_075127	-	1926	2.08125	1.02121	1.02717	0.00135	0.0120939
TCONS_00266101	XLOC_077155	-	553	0.36841	3.49646	-3.24651	0.00115	0.0105259
TCONS_00266144	XLOC_077227	-	2888	0.350401	4.32297	-3.62494	5e-05	0.000627385
TCONS_00268197	XLOC_081746	-	3182	0.538873	1.14007	-1.08111	0.0022	0.0184409
TCONS_00272180	XLOC_076219	-	1487	0.484985	3.02191	-2.63945	5e-05	0.000627385
TCONS_00273170	XLOC_077726	-	2397	5.71998	13.455	-1.23407	5e-05	0.000627385
TCONS_00275652	XLOC_070189	-	4002	0.335999	0.988499	-1.55678	0.00195	0.0166197
TCONS_00276132	XLOC_071114	-	1890	0.31802	1.16601	-1.87439	0.00125	0.0113133
TCONS_00277157	XLOC_073956	-	4963	1.15043	1.88409	-0.711696	0.0026	0.0213034
TCONS_00277930	XLOC_075928	-	1230	12.9076	3.21638	2.00471	0.001	0.00932037
TCONS_00278627	XLOC_077157	-	1196	0.127066	2.04623	-4.00931	0.00225	0.0188021
TCONS_00278628	XLOC_077160	-	1489	0.198634	2.92974	-3.88259	0.0006	0.00594174
TCONS_00281922	XLOC_073966	-	613	41.3118	195.538	-2.24282	5e-05	0.000627385
TCONS_00283248	XLOC_077181	-	1170	0.18683	0.978452	-2.38877	0.00275	0.0223437
TCONS_00284778	XLOC_082261	-	923	4.04138	1.29156	1.64574	5e-05	0.000627385
TCONS_00284813	XLOC_082359	-	794	0.36723	1.63996	-2.1589	0.0031	0.0247363
TCONS_00286477	XLOC_073978	-	2309	0.840054	6.04175	-2.84641	5e-05	0.000627385
TCONS_00289839	XLOC_070197	-	851	0.425782	3.85299	-3.17779	0.0057	0.04151
TCONS_00294374	XLOC_072783	-	1007	0.231437	1.20732	-2.38313	0.00235	0.0195215
TCONS_00296075	XLOC_077766	-	702	10.9943	2.08697	2.39728	0.00015	0.00171726
TCONS_00299027	XLOC_074967	-	751	3.22063	0.957769	1.74959	0.00025	0.00272364
TCONS_00301706	XLOC_070367	-	544	10.1389	2.8496	1.83107	0.0007	0.006805
TCONS_00305637	XLOC_070582	-	4193	0.329274	1.18107	-1.84274	0.00295	0.0237238
TCONS_00305808	XLOC_071050	-	2309	0.146377	1.69782	-3.53591	5e-05	0.000627385
TCONS_00305846	XLOC_071126	-	1540	0.0789809	0.586432	-2.89239	0.0038	0.0294235
TCONS_00306330	XLOC_072407	-	539	0	0.788307	#NAME?	5e-05	0.000627385
TCONS_00306853	XLOC_073955	-	9058	1.27448	2.08945	-0.713215	0.0006	0.00594174
TCONS_00307612	XLOC_075791	-	1101	0.762822	2.26443	-1.56973	0.0006	0.00594174
TCONS_00307638	XLOC_075833	-	6425	0.238817	0.603135	-1.33657	0.00105	0.00971924
TCONS_00308366	XLOC_077416	-	1934	0.0857135	0.830067	-3.27563	0.0003	0.00321156
TCONS_00309729	XLOC_081390	-	675	34.6472	18.3006	0.920849	5e-05	0.000627385
TCONS_00310074	XLOC_082096	-	1070	0.213439	2.14941	-3.33204	0.0001	0.00119145
TCONS_00312323	XLOC_075740	-	4348	0.659504	2.32445	-1.81744	5e-05	0.000627385
TCONS_00313002	XLOC_077349	-	3920	0.0920972	0.829194	-3.17048	5e-05	0.000627385
TCONS_00313101	XLOC_077634	-	1652	6.85234	2.01876	1.76312	0.00235	0.0195215
TCONS_00313567	XLOC_079200	-	2295	0.0429171	1.09025	-4.66695	0.0022	0.0184409
TCONS_00314153	XLOC_081294	-	5361	0.172984	2.11631	-3.61283	0.00035	0.00368417
TCONS_00314334	XLOC_081748	-	1661	0.616969	1.89917	-1.6221	0.0046	0.0345967
TCONS_00314476	XLOC_082095	-	4378	0.267578	1.0412	-1.96021	0.0002	0.00222634
TCONS_00315242	XLOC_071050	-	758	0.192369	2.23585	-3.53887	0.00455	0.0342807
TCONS_00316273	XLOC_073944	-	6002	0.352237	1.26282	-1.84203	5e-05	0.000627385
TCONS_00318253	XLOC_079200	-	1242	0.416383	1.48521	-1.83469	0.0051	0.0377539
TCONS_00320955	XLOC_087449	-	890	1.69967	8.44603	-2.31302	5e-05	0.000627385
TCONS_00321004	XLOC_087463	-	2343	0.530657	4.3327	-3.02942	5e-05	0.000627385
TCONS_00321868	XLOC_088602	-	2124	1.30545	2.33812	-0.840799	0.005	0.037132
TCONS_00324628	XLOC_094555	-	377	0	1.24179	#NAME?	5e-05	0.000627385
TCONS_00325145	XLOC_095944	-	560	4.76442	0.444103	3.42333	0.00035	0.00368417
TCONS_00326196	XLOC_085985	-	2153	10.1704	3.37653	1.59077	0.0057	0.04151
TCONS_00326273	XLOC_086185	-	1673	4.70667	1.35275	1.79881	0.0012	0.01092
TCONS_00327929	XLOC_089236	-	10571	24.9655	18.063	0.466893	0.0014	0.0124897
TCONS_00332428	XLOC_088454	-	1523	1.75862	5.86534	-1.73777	5e-05	0.000627385
TCONS_00335876	XLOC_086391	-	1576	4.03889	11.3661	-1.49271	5e-05	0.000627385
TCONS_00337772	XLOC_091558	-	300	32.9756	9.50687	1.79436	0.0002	0.00222634
TCONS_00356680	XLOC_086210	-	648	1.55474	7.96907	-2.35774	5e-05	0.000627385
TCONS_00357099	XLOC_087477	-	2218	0.183749	1.59226	-3.11527	0.00235	0.0195215
TCONS_00358591	XLOC_091104	-	1471	0.295371	2.68722	-3.18551	5e-05	0.000627385
TCONS_00358882	XLOC_091861	-	1031	0.282927	3.37366	-3.57581	5e-05	0.000627385
TCONS_00360831	XLOC_086051	-	2656	0.546562	1.8303	-1.74362	5e-05	0.000627385
TCONS_00361259	XLOC_087457	-	5640	0.406363	1.71978	-2.08139	5e-05	0.000627385
TCONS_00361273	XLOC_087485	-	2374	0.0706693	0.666383	-3.2372	0.00025	0.00272364
TCONS_00361756	XLOC_088822	-	3702	0.362228	1.29332	-1.83611	0.00045	0.00460371
TCONS_00366623	XLOC_091190	-	1362	0.125816	1.36451	-3.439	0.00355	0.0277701
TCONS_00369327	XLOC_100445	-	9022	0.308291	0.641649	-1.05749	0.0071	0.0499217
TCONS_00369359	XLOC_100466	-	4314	0.202679	0.539049	-1.41122	0.00015	0.00171726
TCONS_00369939	XLOC_101223	-	527	1.59593	19.0477	-3.57715	5e-05	0.000627385
TCONS_00370931	XLOC_102941	-	19945	1.70187	4.52925	-1.41215	0.002	0.0169774
TCONS_00374308	XLOC_109032	-	2448	1.95956	5.86936	-1.58268	0.0002	0.00222634
TCONS_00374590	XLOC_109787	-	4979	0.431234	2.37141	-2.4592	0.00015	0.00171726
TCONS_00374633	XLOC_109787	-	5160	0.339063	1.40631	-2.05229	0.0024	0.0198832
TCONS_00382132	XLOC_101245	-	3428	0.348571	3.24226	-3.21747	5e-05	0.000627385
TCONS_00383425	XLOC_105295	-	1434	1.46325	0.30886	2.24415	0.00285	0.0230215
TCONS_00385221	XLOC_109030	-	3523	0.158921	0.464014	-1.54586	0.00105	0.00971924
TCONS_00399691	XLOC_105093	-	3456	4.45325	0.610683	2.86636	5e-05	0.000627385
TCONS_00400463	XLOC_107162	-	3376	0.201885	0.620491	-1.61988	0.00035	0.00368417
TCONS_00400832	XLOC_108097	-	2839	0.652984	4.38145	-2.74629	5e-05	0.000627385
TCONS_00401505	XLOC_110621	-	721	94.6727	28.3968	1.73722	5e-05	0.000627385
TCONS_00408309	XLOC_109093	-	4361	2.21591	5.2299	-1.23888	0.0001	0.00119145
TCONS_00409860	XLOC_102976	-	1297	4.21084	1.83353	1.19948	0.00015	0.00171726
TCONS_00411361	XLOC_108098	-	2320	0.128313	0.847728	-2.72394	0.0009	0.00850416
TCONS_00414631	XLOC_107761	-	1299	0.190546	1.22032	-2.67904	0.0006	0.00594174
TCONS_00415917	XLOC_100367	-	1498	3.94315	0.877366	2.1681	5e-05	0.000627385
TCONS_00420373	XLOC_113624	-	8963	1.56957	2.5914	-0.723362	0.00085	0.00808185
TCONS_00420408	XLOC_113658	-	431	53.2288	5.19429	3.35721	5e-05	0.000627385
TCONS_00421380	XLOC_115387	-	1173	0.891267	2.96862	-1.73586	5e-05	0.000627385
TCONS_00422903	XLOC_118070	-	1110	8.75814	1.51085	2.53526	5e-05	0.000627385
TCONS_00423833	XLOC_119046	-	3734	0.103091	0.630569	-2.61273	5e-05	0.000627385
TCONS_00426093	XLOC_114680	-	949	2.45912	8.91593	-1.85824	5e-05	0.000627385
TCONS_00429925	XLOC_113427	-	981	3.09605	7.45161	-1.26712	5e-05	0.000627385
TCONS_00430038	XLOC_113658	-	470	26.9368	3.25613	3.04835	0.00035	0.00368417
TCONS_00431081	XLOC_116216	-	2859	0.145834	0.676821	-2.21445	0.00015	0.00171726
TCONS_00432352	XLOC_119131	-	16402	1.59095	3.86324	-1.27992	5e-05	0.000627385
TCONS_00433198	XLOC_112733	-	530	0.642506	0	inf	0.00235	0.0195215
TCONS_00433692	XLOC_114129	-	2817	1.52895	3.51428	-1.20068	0.0068	0.0481156
TCONS_00437195	XLOC_115427	-	2141	25.9577	10.742	1.27291	5e-05	0.000627385
TCONS_00444475	XLOC_120503	-	1536	0.545882	2.25842	-2.04865	5e-05	0.000627385
TCONS_00445405	XLOC_115522	-	2239	20.5549	10.8118	0.926878	5e-05	0.000627385
TCONS_00449028	XLOC_118847	-	783	44.6442	7.26594	2.61925	5e-05	0.000627385
TCONS_00450187	XLOC_113618	-	9973	4.53342	7.64067	-0.7531	5e-05	0.000627385
TCONS_00450348	XLOC_114332	-	4847	0.170805	1.45145	-3.08708	0.00265	0.0216517
TCONS_00450919	XLOC_115965	-	367	0	1.5766	#NAME?	5e-05	0.000627385
TCONS_00451581	XLOC_117807	-	1439	0.101737	1.2864	-3.66042	0.0069	0.0487161
TCONS_00452252	XLOC_119679	-	2154	0.311174	1.07008	-1.78192	0.00015	0.00171726
TCONS_00452320	XLOC_119965	-	2838	0.665455	1.31342	-0.980918	0.00135	0.0120939
TCONS_00452401	XLOC_120313	-	759	0	0.841688	#NAME?	5e-05	0.000627385
TCONS_00453038	XLOC_113427	-	1017	0.51749	2.7745	-2.42263	0.0071	0.0499217
TCONS_00455814	XLOC_113479	-	886	0.380587	1.12922	-1.56903	0.0052	0.0383638
TCONS_00455950	XLOC_113977	-	5838	6.98196	13.6202	-0.96404	5e-05	0.000627385
TCONS_00458214	XLOC_120499	-	2316	0.256709	1.05676	-2.04144	5e-05	0.000627385
TCONS_00459121	XLOC_123556	-	1234	3.04999	7.81235	-1.35695	5e-05	0.000627385
TCONS_00459577	XLOC_124310	-	3024	0.181445	0.512695	-1.49857	0.0008	0.00765733
TCONS_00460576	XLOC_125774	-	1068	99.9003	17.4263	2.51923	0.0001	0.00119145
TCONS_00461526	XLOC_127303	-	1068	41.3227	14.5181	1.50909	5e-05	0.000627385
TCONS_00466281	XLOC_127534	-	225	15.4359	88.8797	-2.52556	0.00045	0.00460371
TCONS_00468048	XLOC_123083	-	3861	5.08249	10.0521	-0.983883	5e-05	0.000627385
TCONS_00468151	XLOC_123479	-	588	0.25923	1.8191	-2.81092	0.0056	0.0408847
TCONS_00470187	XLOC_128239	-	887	0.397678	5.01634	-3.65696	0.0026	0.0213034
TCONS_00471367	XLOC_122719	-	377	40.3064	7.75427	2.37795	5e-05	0.000627385
TCONS_00472057	XLOC_124738	-	5612	0.95591	0.18466	2.372	5e-05	0.000627385
TCONS_00472852	XLOC_126567	-	4071	13.1556	94.4473	-2.84383	5e-05	0.000627385
TCONS_00473963	XLOC_129758	-	3290	3.48112	11.5435	-1.72946	5e-05	0.000627385
TCONS_00477894	XLOC_124732	-	1168	4.14767	0.608859	2.76812	0.00135	0.0120939
TCONS_00478151	XLOC_125510	-	2669	56.0297	31.9815	0.808956	5e-05	0.000627385
TCONS_00478804	XLOC_127789	-	714	21.0233	4.09769	2.3591	5e-05	0.000627385
TCONS_00480202	XLOC_124247	-	10249	5.95102	2.4931	1.25519	0.00105	0.00971924
TCONS_00484391	XLOC_129340	-	751	2.31875	12.2638	-2.40299	5e-05	0.000627385
TCONS_00484392	XLOC_129340	-	432	1.67472	12.1579	-2.8599	5e-05	0.000627385
TCONS_00486158	XLOC_126567	-	1879	9.18152	39.6387	-2.1101	5e-05	0.000627385
TCONS_00487617	XLOC_122918	-	1092	2.71221	17.9544	-2.7268	5e-05	0.000627385
TCONS_00488082	XLOC_124247	-	17807	11.6676	5.01463	1.21829	5e-05	0.000627385
TCONS_00489594	XLOC_128871	-	4047	2.3007	1.1342	1.0204	0.0007	0.006805
TCONS_00489938	XLOC_129686	-	8441	0.490404	1.13439	-1.20987	0.00235	0.0195215
TCONS_00495038	XLOC_127411	-	2665	0.114667	0.726915	-2.66433	0.0038	0.0294235
TCONS_00495062	XLOC_127471	-	1377	0.676088	2.90988	-2.10568	0.00075	0.00723644
TCONS_00497560	XLOC_133694	-	1390	0.933718	12.3256	-3.72252	5e-05	0.000627385
TCONS_00497623	XLOC_133757	-	1127	0.259027	1.3549	-2.38702	0.00125	0.0113133
TCONS_00497939	XLOC_134258	-	438	1.38634	4.61196	-1.7341	0.0023	0.01916
TCONS_00500395	XLOC_138614	-	1627	8.66101	4.558	0.926133	0.0001	0.00119145
TCONS_00501147	XLOC_133237	-	781	1.08709	2.8127	-1.37149	0.00485	0.0361888
TCONS_00501160	XLOC_133266	-	6136	4.68102	1.59287	1.5552	5e-05	0.000627385
TCONS_00501576	XLOC_133974	-	410	27.7066	9.36936	1.56421	5e-05	0.000627385
TCONS_00501801	XLOC_134429	-	660	3.88344	31.2378	-3.00789	5e-05	0.000627385
TCONS_00502442	XLOC_136062	-	2190	35.4232	26.0857	0.441438	0.0031	0.0247363
TCONS_00504671	XLOC_133768	-	1532	0.124422	2.08683	-4.06799	0.00125	0.0113133
TCONS_00504870	XLOC_134291	-	1637	2.64786	9.54883	-1.8505	5e-05	0.000627385
TCONS_00505437	XLOC_136355	-	1588	0.126751	0.573662	-2.1782	0.0024	0.0198832
TCONS_00507010	XLOC_133404	-	4478	22.8876	9.55222	1.26066	0.0016	0.0140101
TCONS_00509213	XLOC_132197	-	4486	30.5824	6.37773	1.87351	5e-05	0.000627385
TCONS_00509913	XLOC_134037	-	1719	1.16372	3.63606	-1.64364	5e-05	0.000627385
TCONS_00513761	XLOC_132797	-	1211	19.8503	42.7929	-1.10821	5e-05	0.000627385
TCONS_00514857	XLOC_136565	-	3854	10.8612	2.51657	2.10966	0.0023	0.01916
TCONS_00515921	XLOC_133264	-	563	0.130323	0.97126	-2.89776	0.00655	0.0466543
TCONS_00516836	XLOC_136565	-	3310	13.3046	0.550264	4.59566	0.00175	0.015129
TCONS_00517182	XLOC_137512	-	1851	0.0946066	0.764813	-3.01509	0.00655	0.0466543
TCONS_00520257	XLOC_133694	-	1053	0.724805	4.06039	-2.48596	0.00375	0.0290952
TCONS_00520525	XLOC_134306	-	4372	2.06078	6.0371	-1.55066	0.0008	0.00765733
TCONS_00522748	XLOC_133549	-	1578	0.636555	2.71242	-2.09122	0.0007	0.006805
TCONS_00522819	XLOC_133700	-	3753	0.212925	4.02376	-4.24012	5e-05	0.000627385
TCONS_00522820	XLOC_133700	-	4673	0.210034	1.51568	-2.85127	0.00325	0.0257619
TCONS_00522836	XLOC_133718	-	5651	0.0980657	0.407711	-2.05572	0.00435	0.0329738
TCONS_00522939	XLOC_133975	-	1123	2.0099	0.846537	1.24748	0.00135	0.0120939
TCONS_00524007	XLOC_137433	-	791	2.73798	0.57216	2.25862	0.0068	0.0481156
TCONS_00526492	XLOC_137560	-	3895	2.19452	6.03142	-1.45859	5e-05	0.000627385
TCONS_00527800	XLOC_141161	-	240	8.03985	74.654	-3.21498	5e-05	0.000627385
TCONS_00528045	XLOC_141657	-	3353	1.62252	0.544126	1.57622	0.0003	0.00321156
TCONS_00528284	XLOC_142027	-	611	7.4385	46.4397	-2.64227	5e-05	0.000627385
TCONS_00528794	XLOC_142567	-	4392	2.92071	13.1426	-2.16986	5e-05	0.000627385
TCONS_00529780	XLOC_143657	-	3826	0.357417	0.726582	-1.02352	0.005	0.037132
TCONS_00529786	XLOC_143663	-	1330	7.0295	2.32471	1.59637	0.00045	0.00460371
TCONS_00529840	XLOC_143761	-	5257	0.432361	1.67054	-1.95	0.00085	0.00808185
TCONS_00529860	XLOC_143782	-	1491	3.79515	27.8039	-2.87306	0.0009	0.00850416
TCONS_00531531	XLOC_146448	-	3028	2.10628	0.761609	1.46758	0.002	0.0169774
TCONS_00532242	XLOC_147804	-	1553	0.241232	1.69357	-2.81157	5e-05	0.000627385
TCONS_00533056	XLOC_148796	-	4003	1.782	5.7623	-1.69315	5e-05	0.000627385
TCONS_00533439	XLOC_149596	-	2141	0.526005	2.17598	-2.04852	5e-05	0.000627385
TCONS_00534650	XLOC_151643	-	532	395.612	584.029	-0.561953	5e-05	0.000627385
TCONS_00535860	XLOC_153508	-	3834	0.556069	2.21197	-1.992	5e-05	0.000627385
TCONS_00539106	XLOC_144129	-	12299	70.3452	281.271	-1.99944	5e-05	0.000627385
TCONS_00540347	XLOC_146471	-	4137	0.0498719	0.466088	-3.2243	0.0049	0.0365022
TCONS_00549860	XLOC_150149	-	4361	0.239258	0.66233	-1.46898	0.0008	0.00765733
TCONS_00567945	XLOC_147922	-	3225	8.8331	16.662	-0.915567	0.00015	0.00171726
TCONS_00572954	XLOC_146129	-	570	0.631028	4.61222	-2.86969	5e-05	0.000627385
TCONS_00579716	XLOC_149652	-	1644	0.886682	4.31876	-2.28413	0.0051	0.0377539
TCONS_00583817	XLOC_146750	-	812	0.415556	3.5252	-3.08459	5e-05	0.000627385
TCONS_00589262	XLOC_147619	-	1642	15.2105	34.2767	-1.17216	5e-05	0.000627385
TCONS_00589313	XLOC_147701	-	4352	0.158878	0.741511	-2.22255	5e-05	0.000627385
TCONS_00589798	XLOC_148782	-	11093	0.38796	1.37992	-1.83061	0.00015	0.00171726
TCONS_00590172	XLOC_149807	-	8102	0.381007	2.17595	-2.51376	0.00165	0.0143795
TCONS_00592631	XLOC_142644	-	2390	0.360491	3.19076	-3.14586	0.0064	0.0457816
TCONS_00594127	XLOC_146471	-	4011	0.188032	0.513349	-1.44896	0.00115	0.0105259
TCONS_00595179	XLOC_149596	-	4338	0.232934	0.657547	-1.49717	0.00645	0.0460834
TCONS_00595236	XLOC_149652	-	14219	0.960352	3.87129	-2.01118	5e-05	0.000627385
TCONS_00596442	XLOC_153409	-	3591	0.188846	0.636103	-1.75205	0.0047	0.0352328
TCONS_00600160	XLOC_149652	-	6387	1.15208	4.70615	-2.0303	5e-05	0.000627385
TCONS_00601959	XLOC_156756	-	3112	19.5796	4.86243	2.0096	5e-05	0.000627385
TCONS_00602059	XLOC_156940	-	549	11.2533	4.3715	1.36415	0.0002	0.00222634
TCONS_00602271	XLOC_157192	-	3652	0.822311	5.69799	-2.7927	0.0013	0.011703
TCONS_00602794	XLOC_158087	-	1074	1.8461	8.87552	-2.26535	0.00235	0.0195215
TCONS_00602795	XLOC_158087	-	1177	3.04398	10.8874	-1.83863	0.00115	0.0105259
TCONS_00605444	XLOC_162713	-	10117	2.56017	5.43496	-1.08603	5e-05	0.000627385
TCONS_00606269	XLOC_164015	-	4153	0.737342	3.18941	-2.11288	0.0067	0.0475268
TCONS_00606368	XLOC_164070	-	1443	3.9981	7.80464	-0.965019	0.00015	0.00171726
TCONS_00606423	XLOC_164070	-	278	225.307	43.0723	2.38706	5e-05	0.000627385
TCONS_00606513	XLOC_164289	-	3925	0.324501	1.07025	-1.72166	5e-05	0.000627385
TCONS_00607141	XLOC_165584	-	3083	4.99999	12.1583	-1.28195	0.00065	0.00638377
TCONS_00607608	XLOC_166468	-	2994	1.27123	2.83711	-1.1582	0.00175	0.015129
TCONS_00611559	XLOC_163006	-	2455	21.5174	5.39515	1.99577	5e-05	0.000627385
TCONS_00612262	XLOC_164385	-	5374	1.2971	4.81004	-1.89076	5e-05	0.000627385
TCONS_00613231	XLOC_166827	-	2815	15.4239	0.870485	4.1472	0.00075	0.00723644
TCONS_00615864	XLOC_161755	-	1074	6.74827	2.64291	1.35239	5e-05	0.000627385
TCONS_00616518	XLOC_163422	-	6566	0.223954	1.08082	-2.27085	0.0008	0.00765733
TCONS_00616733	XLOC_164021	-	606	0.757275	2.63495	-1.79889	0.00205	0.0173499
TCONS_00617293	XLOC_165602	-	631	3.96094	1.73982	1.1869	0.00275	0.0223437
TCONS_00619833	XLOC_161097	-	1391	5.25294	0.759241	2.7905	0.0027	0.0220069
TCONS_00622440	XLOC_157192	-	1004	1.39302	7.89083	-2.50196	0.0034	0.0267578
TCONS_00622827	XLOC_158087	-	6332	1.09956	3.6822	-1.74364	5e-05	0.000627385
TCONS_00626602	XLOC_157277	-	2242	1.01118	3.85252	-1.92976	0.00475	0.0355475
TCONS_00627614	XLOC_160458	-	1150	2.0746	4.10389	-0.984161	0.00055	0.00549577
TCONS_00628149	XLOC_162633	-	2695	14.6896	7.88373	0.897845	5e-05	0.000627385
TCONS_00628172	XLOC_162694	-	2277	4.98968	1.54038	1.69566	0.0066	0.0469443
TCONS_00631822	XLOC_163261	-	622	2.92441	27.1648	-3.21552	5e-05	0.000627385
TCONS_00632235	XLOC_164385	-	4674	2.15992	4.442	-1.04024	0.00675	0.0478144
TCONS_00633313	XLOC_157046	-	2649	3.3427	0.972211	1.78167	0.00615	0.0442345
TCONS_00633955	XLOC_159086	-	1502	5.72813	1.9065	1.58714	0.00495	0.0368224
TCONS_00638575	XLOC_163006	-	3509	6.40314	1.33767	2.25906	0.0018	0.0155092
TCONS_00641455	XLOC_160111	-	2107	0.298672	0.799435	-1.42042	0.00185	0.0158744
TCONS_00643583	XLOC_166452	-	1088	0.478209	1.14579	-1.26063	0.0058	0.0421364
TCONS_00645855	XLOC_161449	-	1638	0.21489	1.42982	-2.73417	0.0043	0.0326437
TCONS_00646493	XLOC_163288	-	1102	0.523362	3.75715	-2.84376	5e-05	0.000627385
TCONS_00646904	XLOC_164530	-	1540	12.7001	6.10339	1.05716	5e-05	0.000627385
TCONS_00647427	XLOC_166542	-	2458	0.285966	2.18245	-2.93203	5e-05	0.000627385
TCONS_00647479	XLOC_166684	-	579	0	0.782949	#NAME?	5e-05	0.000627385
TCONS_00648037	XLOC_156682	-	2433	1.63026	0.547388	1.57447	0.00265	0.0216517
TCONS_00649837	XLOC_161266	-	2521	0.10831	0.493943	-2.18918	0.00685	0.0484114
TCONS_00652697	XLOC_170499	-	2020	5.45064	1.43124	1.92916	0.0021	0.0177095
TCONS_00654824	XLOC_173988	-	3418	3.32904	5.73319	-0.784232	5e-05	0.000627385
TCONS_00655426	XLOC_175286	-	1471	0.129526	0.657697	-2.34418	0.00465	0.0349042
TCONS_00656271	XLOC_176836	-	1573	1.05713	3.50304	-1.72846	5e-05	0.000627385
TCONS_00657386	XLOC_179447	-	910	2.98528	13.8314	-2.21201	5e-05	0.000627385
TCONS_00657622	XLOC_179882	-	3020	0.201697	1.49463	-2.88953	5e-05	0.000627385
TCONS_00657631	XLOC_179912	-	2103	3.25638	6.77475	-1.0569	0.0017	0.0147499
TCONS_00660940	XLOC_174527	-	409	9.80444	3.21137	1.61025	0.00025	0.00272364
TCONS_00661460	XLOC_175602	-	2390	0.669581	3.98886	-2.57465	5e-05	0.000627385
TCONS_00661461	XLOC_175602	-	1300	1.06845	4.91962	-2.20302	5e-05	0.000627385
TCONS_00666657	XLOC_175612	-	3564	1.80496	8.49195	-2.23413	0.0004	0.00415277
TCONS_00670877	XLOC_175612	-	25239	1.91368	5.80307	-1.60047	5e-05	0.000627385
TCONS_00675046	XLOC_175602	-	922	3.37511	6.56566	-0.960006	0.0014	0.0124897
TCONS_00676273	XLOC_179447	-	451	15.3861	68.2148	-2.14846	5e-05	0.000627385
TCONS_00679295	XLOC_176900	-	2690	1.70781	4.89053	-1.51784	5e-05	0.000627385
TCONS_00679880	XLOC_179430	-	6054	2.80995	1.92369	0.546666	0.0063	0.0451529
TCONS_00682981	XLOC_177367	-	768	0.759056	2.24646	-1.56538	0.00055	0.00549577
TCONS_00683458	XLOC_178951	-	1000	0.276189	5.44264	-4.30058	0.00145	0.0128782
TCONS_00685932	XLOC_175806	-	3717	6.76907	11.2171	-0.728669	0.00275	0.0223437
TCONS_00687879	XLOC_171046	-	2481	1.08339	2.7207	-1.32843	0.00185	0.0158744
TCONS_00691397	XLOC_169850	-	3349	0.225777	0.634269	-1.4902	0.00195	0.0166197
TCONS_00693449	XLOC_175573	-	2546	0.276391	1.26129	-2.19011	0.00015	0.00171726
TCONS_00694518	XLOC_178658	-	474	6.66287	14.1027	-1.08176	0.00045	0.00460371
TCONS_00694729	XLOC_179432	-	1980	27.3205	6.10364	2.16224	5e-05	0.000627385
TCONS_00695937	XLOC_170872	-	3552	3.04068	0.792029	1.94077	5e-05	0.000627385
TCONS_00696926	XLOC_173980	-	1254	0.471632	2.36005	-2.32309	0.0003	0.00321156
TCONS_00701510	XLOC_175602	-	14107	0.452207	3.36374	-2.89501	0.0032	0.0254182
TCONS_00701516	XLOC_175612	-	22781	1.35146	3.42336	-1.3409	5e-05	0.000627385
TCONS_00704171	XLOC_184970	-	2885	0.93778	3.08073	-1.71595	0.0021	0.0177095
TCONS_00704746	XLOC_186215	-	202	163.831	1419.11	-3.11471	5e-05	0.000627385
TCONS_00705657	XLOC_187563	-	624	102.989	57.0238	0.852848	5e-05	0.000627385
TCONS_00705660	XLOC_187566	-	2793	12.5068	5.5243	1.17885	5e-05	0.000627385
TCONS_00705775	XLOC_187744	-	4823	1.49395	0.590263	1.3397	0.0057	0.04151
TCONS_00706506	XLOC_188786	-	1432	1.63854	0.443292	1.88608	0.0057	0.04151
TCONS_00706819	XLOC_189103	-	1514	7.02994	18.2147	-1.37352	5e-05	0.000627385
TCONS_00707194	XLOC_189646	-	640	5.89126	1.65619	1.8307	0.00055	0.00549577
TCONS_00707691	XLOC_190294	-	2468	2.82176	0.664502	2.08625	0.00175	0.015129
TCONS_00716837	XLOC_193069	-	1543	8.07195	2.58732	1.64146	0.0011	0.0101285
TCONS_00716950	XLOC_193215	-	43075	245.832	28.2788	3.63694	5e-05	0.000627385
TCONS_00717048	XLOC_193475	-	2927	1.5522	3.67393	-1.24301	0.0071	0.0499217
TCONS_00717209	XLOC_193867	-	3163	4.27635	2.3033	0.892679	0.00185	0.0158744
TCONS_00717256	XLOC_194024	-	5458	1.45578	0.253767	2.52022	0.00045	0.00460371
TCONS_00718582	XLOC_196749	-	570	0.667814	3.03918	-2.18616	0.00075	0.00723644
TCONS_00722119	XLOC_191283	-	1679	6.71198	12.2446	-0.86734	5e-05	0.000627385
TCONS_00722701	XLOC_192655	-	8983	0.481007	1.56177	-1.69905	5e-05	0.000627385
TCONS_00723236	XLOC_193483	-	366	0	1.29839	#NAME?	5e-05	0.000627385
TCONS_00723892	XLOC_196033	-	1808	6.23911	1.43589	2.11939	0.0017	0.0147499
TCONS_00723949	XLOC_196100	-	3152	4.78954	0.916625	2.38548	0.0008	0.00765733
TCONS_00728248	XLOC_193213	-	4773	247.065	24.9526	3.30763	5e-05	0.000627385
TCONS_00728908	XLOC_196033	-	2124	3.96313	1.00912	1.97354	0.00475	0.0355475
TCONS_00729407	XLOC_196947	-	1405	76.1156	346.652	-2.18723	5e-05	0.000627385
TCONS_00744379	XLOC_187723	-	3820	0.755718	2.3262	-1.62205	0.0021	0.0177095
TCONS_00744508	XLOC_188155	-	1604	2.7325	8.13964	-1.57475	5e-05	0.000627385
TCONS_00746305	XLOC_193215	-	27686	123.723	7.97039	3.76701	5e-05	0.000627385
TCONS_00750617	XLOC_193215	-	14832	496.188	22.9631	3.8577	5e-05	0.000627385
TCONS_00750683	XLOC_193475	-	2359	1.95473	5.28888	-1.43599	0.0053	0.0390122
TCONS_00751549	XLOC_196947	-	990	53.9867	244.235	-2.1776	5e-05	0.000627385
TCONS_00753260	XLOC_188281	-	11845	0.340002	1.63687	-2.26732	0.0049	0.0365022
TCONS_00754200	XLOC_190091	-	1577	0.154384	0.753581	-2.28724	0.00055	0.00549577
TCONS_00754232	XLOC_190141	-	1827	0.311011	1.02221	-1.71665	0.0001	0.00119145
TCONS_00754371	XLOC_190534	-	3454	4.27026	7.55928	-0.823927	5e-05	0.000627385
TCONS_00759081	XLOC_190463	-	1205	3.5691	8.9865	-1.3322	5e-05	0.000627385
TCONS_00759099	XLOC_190523	-	474	0	1.51016	#NAME?	5e-05	0.000627385
TCONS_00759720	XLOC_192641	-	877	0.0646259	0.568375	-3.13666	0.00525	0.0386843
TCONS_00759748	XLOC_192655	-	7090	0.576081	1.46679	-1.34832	0.00035	0.00368417
TCONS_00763192	XLOC_188786	-	695	8.73135	0.551905	3.98371	0.00095	0.00890592
TCONS_00763382	XLOC_189179	-	1603	0.145677	0.661134	-2.18217	0.00445	0.03364
TCONS_00767912	XLOC_202457	-	1830	0.29844	1.93731	-2.69854	0.0005	0.00505175
TCONS_00768611	XLOC_203437	-	3683	0.394854	0.82314	-1.05982	0.00585	0.0424518
TCONS_00769810	XLOC_205438	-	2255	1.82237	5.63089	-1.62755	5e-05	0.000627385
TCONS_00771126	XLOC_207906	-	1341	8.89831	3.88414	1.19594	0.00175	0.015129
TCONS_00771710	XLOC_208963	-	877	0.273787	2.2125	-3.01455	0.0032	0.0254182
TCONS_00771720	XLOC_208973	-	714	0.891522	2.34879	-1.39758	0.0047	0.0352328
TCONS_00771855	XLOC_209235	-	583	18.0509	38.7696	-1.10285	5e-05	0.000627385
TCONS_00771970	XLOC_209362	-	784	7.86385	0.606379	3.69694	0.00145	0.0128782
TCONS_00772099	XLOC_209666	-	1804	2.85633	0.206207	3.792	0.00085	0.00808185
TCONS_00772371	XLOC_210256	-	2471	8.57816	14.8515	-0.791871	0.00075	0.00723644
TCONS_00772646	XLOC_210531	-	2708	2.89206	8.63624	-1.57831	5e-05	0.000627385
TCONS_00773376	XLOC_211387	-	1852	0.182975	0.840154	-2.199	0.0002	0.00222634
TCONS_00773412	XLOC_211422	-	1191	0.33992	2.10329	-2.62938	5e-05	0.000627385
TCONS_00774501	XLOC_213333	-	18197	62.3657	5.03497	3.6307	5e-05	0.000627385
TCONS_00774510	XLOC_213338	-	1920	69.4596	3.77991	4.19975	0.00235	0.0195215
TCONS_00774777	XLOC_214122	-	6305	1.98855	0.492304	2.0141	0.00035	0.00368417
TCONS_00775688	XLOC_216192	-	2099	0.282909	1.17776	-2.05764	0.0004	0.00415277
TCONS_00776088	XLOC_216855	-	678	0.33991	4.27747	-3.65353	0.0048	0.0358743
TCONS_00776357	XLOC_217396	-	4589	0.682988	0.215905	1.66146	0.0005	0.00505175
TCONS_00778649	XLOC_203794	-	5387	1.75078	0.459081	1.93117	0.00025	0.00272364
TCONS_00780421	XLOC_207328	-	1230	0.126783	0.962905	-2.92504	0.00385	0.0297521
TCONS_00780626	XLOC_207771	-	343	0	1.95826	#NAME?	5e-05	0.000627385
TCONS_00781996	XLOC_210531	-	3196	1.60003	3.75562	-1.23095	0.00045	0.00460371
TCONS_00781998	XLOC_210537	-	781	0.459853	4.01314	-3.12549	5e-05	0.000627385
TCONS_00782815	XLOC_211941	-	527	3.00083	0.382828	2.97059	0.00355	0.0277701
TCONS_00783490	XLOC_213284	-	811	4.53521	2.27993	0.992179	0.0025	0.020608
TCONS_00788675	XLOC_207900	-	5267	1.27996	4.66146	-1.86468	5e-05	0.000627385
TCONS_00789887	XLOC_210786	-	1338	12.642	3.86811	1.70852	0.0004	0.00415277
TCONS_00790914	XLOC_213283	-	736	7.40905	2.38434	1.6357	5e-05	0.000627385
TCONS_00791495	XLOC_215603	-	2666	2.90066	0.743317	1.96433	5e-05	0.000627385
TCONS_00791994	XLOC_216897	-	1027	1.71386	7.55531	-2.14024	5e-05	0.000627385
TCONS_00794612	XLOC_205620	-	542	0.28625	2.05825	-2.84607	0.00645	0.0460834
TCONS_00795325	XLOC_207803	-	1094	1.03111	7.58084	-2.87815	5e-05	0.000627385
TCONS_00795395	XLOC_207971	-	2546	0.885103	2.16246	-1.28876	0.0017	0.0147499
TCONS_00795436	XLOC_208077	-	1653	0.10683	1.48799	-3.79998	0.0039	0.0300614
TCONS_00795551	XLOC_208508	-	324	328.154	60.9221	2.42934	5e-05	0.000627385
TCONS_00795552	XLOC_208508	-	2954	8.53824	1.81489	2.23406	5e-05	0.000627385
TCONS_00800145	XLOC_203570	-	967	6.47883	15.8766	-1.29309	5e-05	0.000627385
TCONS_00800730	XLOC_204602	-	2233	13.6812	60.4926	-2.14457	5e-05	0.000627385
TCONS_00801853	XLOC_207825	-	1661	8.84015	4.28314	1.0454	0.0007	0.006805
TCONS_00801870	XLOC_207876	-	1747	20.468	36.3814	-0.82983	5e-05	0.000627385
TCONS_00802055	XLOC_208508	-	573	96.5553	23.0739	2.06509	5e-05	0.000627385
TCONS_00803786	XLOC_212934	-	7185	0.564612	1.95265	-1.7901	0.0001	0.00119145
TCONS_00807865	XLOC_207974	-	5089	86.3502	21.4492	2.00928	5e-05	0.000627385
TCONS_00809985	XLOC_215603	-	2472	1.49984	0.326268	2.20068	0.0006	0.00594174
TCONS_00819206	XLOC_210793	-	1797	89.753	152.826	-0.76786	0.00025	0.00272364
TCONS_00822198	XLOC_203483	-	2708	0.480068	1.24847	-1.37886	0.00535	0.039323
TCONS_00823693	XLOC_207825	-	1963	5.74306	2.31995	1.30773	0.0003	0.00321156
TCONS_00826473	XLOC_217664	-	499	217.414	92.8613	1.2273	5e-05	0.000627385
TCONS_00827291	XLOC_201596	-	5307	0.494978	3.75592	-2.92373	0.00035	0.00368417
TCONS_00829557	XLOC_207649	-	5343	0.106271	0.76227	-2.84256	0.0043	0.0326437
TCONS_00829732	XLOC_207993	-	558	2.25098	10.6426	-2.24122	0.00355	0.0277701
TCONS_00831223	XLOC_211403	-	2083	0.239484	2.08473	-3.12186	0.0001	0.00119145
TCONS_00831338	XLOC_211669	-	5050	0.210538	1.40197	-2.7353	5e-05	0.000627385
TCONS_00832551	XLOC_215674	-	1864	0.0673813	0.812907	-3.59267	0.00045	0.00460371
TCONS_00833191	XLOC_217701	-	376	0	1.68445	#NAME?	5e-05	0.000627385
TCONS_00834042	XLOC_201596	-	4178	3.77784	11.8563	-1.65003	5e-05	0.000627385
TCONS_00834147	XLOC_202069	-	2934	1.60777	9.10514	-2.50162	5e-05	0.000627385
TCONS_00837086	XLOC_210441	-	14712	7.24694	17.9132	-1.30558	5e-05	0.000627385
TCONS_00838397	XLOC_214727	-	2908	1.34592	3.80232	-1.49829	5e-05	0.000627385
TCONS_00838399	XLOC_214727	-	4803	1.00061	2.86831	-1.51932	5e-05	0.000627385
TCONS_00838406	XLOC_214740	-	7497	0.989569	1.78341	-0.849768	0.003	0.0240508
TCONS_00838899	XLOC_216577	-	1206	0.226217	1.22446	-2.43637	0.0005	0.00505175
TCONS_00840054	XLOC_201520	-	7599	3.39213	4.91534	-0.535103	0.00195	0.0166197
TCONS_00841222	XLOC_204602	-	9752	0.789299	2.13557	-1.43598	5e-05	0.000627385
TCONS_00841232	XLOC_204621	-	7526	0.786495	1.96386	-1.32018	5e-05	0.000627385
TCONS_00845971	XLOC_217722	-	659	13.3155	4.9249	1.43494	0.00125	0.0113133
TCONS_00846409	XLOC_219971	-	691	0.90222	3.6343	-2.01013	0.00105	0.00971924
TCONS_00849006	XLOC_225275	-	689	9.83365	4.37065	1.16988	0.0002	0.00222634
TCONS_00849877	XLOC_226921	-	847	0.258473	1.81785	-2.81415	0.0043	0.0326437
TCONS_00850525	XLOC_228232	-	664	1.4431	3.31057	-1.19791	0.0056	0.0408847
TCONS_00852757	XLOC_220263	-	1544	1.65796	5.72894	-1.78886	0.0001	0.00119145
TCONS_00852940	XLOC_220657	-	1115	1.90449	5.16723	-1.43999	0.00095	0.00890592
TCONS_00853098	XLOC_220968	-	672	0.609064	2.04439	-1.747	0.00215	0.0180806
TCONS_00853330	XLOC_221408	-	886	0.134449	1.12704	-3.0674	0.00495	0.0368224
TCONS_00857318	XLOC_230662	-	13105	2.30096	4.60357	-1.00051	0.00025	0.00272364
TCONS_00862693	XLOC_221367	-	1199	1.06573	2.12678	-0.996826	0.00465	0.0349042
TCONS_00868552	XLOC_227928	-	830	1.808	8.44259	-2.22329	0.0001	0.00119145
TCONS_00868899	XLOC_229307	-	6057	23.9435	2.88777	3.0516	5e-05	0.000627385
TCONS_00874814	XLOC_225408	-	2403	10.599	5.7675	0.877912	5e-05	0.000627385
TCONS_00877164	XLOC_221514	-	976	1.79953	0.589628	1.60975	0.001	0.00932037
TCONS_00878629	XLOC_227486	-	619	2.68867	6.16082	-1.19623	0.00065	0.00638377
TCONS_00879589	XLOC_230869	-	3777	9.42247	4.04921	1.21846	5e-05	0.000627385
TCONS_00880081	XLOC_220169	-	1431	0.248985	0.689872	-1.47027	0.00525	0.0386843
TCONS_00883121	XLOC_219974	-	1260	0.497053	1.87241	-1.91342	0.0001	0.00119145
TCONS_00883164	XLOC_220053	-	6288	1.49297	7.94067	-2.41108	5e-05	0.000627385
TCONS_00883522	XLOC_220967	-	688	0.364166	1.56748	-2.10578	0.00255	0.0209604
TCONS_00883525	XLOC_220970	-	4100	0.195407	1.45305	-2.89453	5e-05	0.000627385
TCONS_00885492	XLOC_227085	-	2387	0.777855	3.48873	-2.16513	0.0036	0.0280992
TCONS_00885736	XLOC_227944	-	772	0.152427	1.2367	-3.02031	0.00555	0.040572
TCONS_00889805	XLOC_229262	-	822	12.2285	0.677826	4.17319	0.0006	0.00594174
TCONS_00891202	XLOC_221155	-	1818	8.62595	17.3549	-1.00859	0.00025	0.00272364
TCONS_00891267	XLOC_221328	-	2373	12.541	6.81735	0.879373	0.00075	0.00723645
TCONS_00893269	XLOC_227011	-	367	1.71804	6.55409	-1.93163	0.0019	0.0162503
TCONS_00895493	XLOC_234237	-	1781	5.64199	2.87049	0.974906	0.00315	0.025083
TCONS_00896802	XLOC_236799	-	1833	0.188495	0.482672	-1.35652	0.00685	0.0484114
TCONS_00897003	XLOC_237162	-	1284	2.31973	5.63832	-1.28131	5e-05	0.000627385
TCONS_00897038	XLOC_237199	-	1351	0.601758	3.2466	-2.43167	5e-05	0.000627385
TCONS_00898854	XLOC_240008	-	498	0.158303	1.16582	-2.88059	0.00655	0.0466543
TCONS_00899791	XLOC_241086	-	3416	0.877596	1.74546	-0.991978	0.00045	0.00460371
TCONS_00899902	XLOC_241106	-	5605	1.91588	7.4501	-1.95925	5e-05	0.000627385
TCONS_00899921	XLOC_241113	-	2015	0.461325	2.93093	-2.6675	0.0016	0.0140101
TCONS_00900129	XLOC_241359	-	2671	2.29556	5.90648	-1.36345	5e-05	0.000627385
TCONS_00900133	XLOC_241360	-	8553	1.32038	5.03284	-1.93042	5e-05	0.000627385
TCONS_00900658	XLOC_242319	-	1609	2.0505	8.06995	-1.97659	5e-05	0.000627385
TCONS_00901074	XLOC_242888	-	2179	0.165124	0.724069	-2.13258	0.0011	0.0101285
TCONS_00901362	XLOC_243535	-	2091	0.124987	0.914444	-2.87112	0.00145	0.0128782
TCONS_00902027	XLOC_233445	-	856	1.38994	3.28478	-1.24077	0.00075	0.00723644
TCONS_00903442	XLOC_236091	-	2398	11.334	7.94639	0.51229	0.0052	0.0383638
TCONS_00909870	XLOC_237461	-	1507	0.251242	1.0573	-2.07323	0.00025	0.00272364
TCONS_00911676	XLOC_241101	-	4013	1.01228	3.25781	-1.68629	0.00155	0.0136406
TCONS_00911682	XLOC_241102	-	5285	1.4663	5.4004	-1.88089	5e-05	0.000627385
TCONS_00912001	XLOC_241697	-	964	0.481142	1.52872	-1.66779	0.00675	0.0478144
TCONS_00914719	XLOC_237188	-	1046	1.06103	4.15936	-1.9709	0.00345	0.0271031
TCONS_00916430	XLOC_241113	-	873	4.24208	10.2644	-1.27481	0.0012	0.01092
TCONS_00917425	XLOC_244154	-	1763	0.524799	9.0609	-4.10982	5e-05	0.000627385
TCONS_00919905	XLOC_239387	-	11696	5.77607	4.27107	0.43549	0.0058	0.0421364
TCONS_00920205	XLOC_240325	-	4135	8.76624	1.96466	2.15768	0.00075	0.00723644
TCONS_00921745	XLOC_244078	-	3024	9.40692	4.88164	0.946355	0.0015	0.0132566
TCONS_00922215	XLOC_234105	-	2555	9.25291	16.6825	-0.850354	0.00055	0.00549577
TCONS_00922364	XLOC_234627	-	4050	0.880941	0.250059	1.81678	0.00105	0.00971924
TCONS_00923230	XLOC_237314	-	2318	3.40969	0.431804	2.98119	0.0026	0.0213034
TCONS_00923231	XLOC_237314	-	1993	4.51716	0.635816	2.82873	0.00295	0.0237238
TCONS_00923886	XLOC_239092	-	3993	8.54382	6.14123	0.476354	0.00705	0.0496317
TCONS_00924970	XLOC_242030	-	2058	4.70402	1.39771	1.75083	0.0001	0.00119145
TCONS_00931827	XLOC_241094	-	2705	1.36836	3.47217	-1.34339	5e-05	0.000627385
TCONS_00931990	XLOC_241360	-	8484	0.127452	1.06921	-3.06852	0.00275	0.0223437
TCONS_00935496	XLOC_241083	-	879	24.9234	48.2735	-0.953734	0.00035	0.00368417
TCONS_00937693	XLOC_236299	-	1456	32.792	6.27426	2.38582	5e-05	0.000627385
TCONS_00940797	XLOC_233649	-	520	0	1.13046	#NAME?	0.0065	0.0463821
TCONS_00943428	XLOC_241113	-	838	1.52727	6.14121	-2.00756	0.00155	0.0136406
TCONS_00943570	XLOC_241357	-	4146	3.36139	9.53902	-1.50478	5e-05	0.000627385
TCONS_00944249	XLOC_243255	-	4824	0.393055	0.931831	-1.24534	0.003	0.0240508
TCONS_00944972	XLOC_233802	-	4814	3.42418	7.36214	-1.10437	5e-05	0.000627385
TCONS_00946134	XLOC_237290	-	2467	0.100757	1.30696	-3.69726	0.00105	0.00971924
TCONS_00947421	XLOC_241086	-	1026	0.802175	2.66298	-1.73105	5e-05	0.000627385
TCONS_00949203	XLOC_246707	-	3557	3.7379	21.8167	-2.54513	5e-05	0.000627385
TCONS_00949380	XLOC_247096	-	3300	0.783719	5.83407	-2.89609	0.0008	0.00765733
TCONS_00954064	XLOC_255091	-	546	1.75419	5.90649	-1.75149	5e-05	0.000627385
TCONS_00956088	XLOC_247095	-	1931	1.2999	6.46936	-2.31522	5e-05	0.000627385
TCONS_00959499	XLOC_253292	-	5235	0.384979	2.86784	-2.89711	5e-05	0.000627385
TCONS_00964114	XLOC_251674	-	2484	2.50195	1.08641	1.20349	5e-05	0.000627385
TCONS_00965495	XLOC_255334	-	287	0	3.52541	#NAME?	5e-05	0.000627385
TCONS_00971393	XLOC_247139	-	15842	0.373795	2.39586	-2.68023	5e-05	0.000627385
TCONS_00990658	XLOC_247103	-	5715	1.01	5.73477	-2.50538	5e-05	0.000627385
TCONS_00990661	XLOC_247107	-	4925	0.978685	5.01746	-2.35804	0.00015	0.00171726
TCONS_00991075	XLOC_248490	-	823	1.16376	2.94228	-1.33814	0.0009	0.00850416
TCONS_00994711	XLOC_247102	-	14010	0.471927	3.11077	-2.72064	0.0027	0.0220069
TCONS_00994718	XLOC_247112	-	8533	0.326911	3.48879	-3.41576	5e-05	0.000627385
TCONS_00997503	XLOC_255945	-	2952	0.539088	1.24292	-1.20515	0.0019	0.0162503
TCONS_00998976	XLOC_248330	-	4882	1.92163	6.10047	-1.66659	0.0034	0.0267578
TCONS_00999094	XLOC_248714	-	389	2.21495	22.9705	-3.37444	5e-05	0.000627385
TCONS_00999294	XLOC_249259	-	2267	4.62966	2.85109	0.699391	0.0028	0.0226888
XM_001119824.3	724756	-	960	22.6208	35.7916	-0.661973	0.0054	0.0396288
XM_001119830.2	724231	-	1424	5.76163	10.4226	-0.855161	0.00025	0.00272364
XM_001119836.3	724450	-	5334	27.502	15.749	0.804282	5e-05	0.000627385
XM_001119847.3	724115	-	2014	13.1524	24.5038	-0.89768	5e-05	0.000627385
XM_001119879.3	724580	-	764	8.20569	18.7531	-1.19243	5e-05	0.000627385
XM_001119882.3	725033	-	4086	2.16035	4.06121	-0.910648	0.00525	0.0386843
XM_001119897.3	724326	-	672	16.8441	34.8996	-1.05097	5e-05	0.000627385
XM_001119899.3	724678	-	642	351.666	104.327	1.7531	5e-05	0.000627385
XM_001119900.3	724144	-	721	35.158	101.606	-1.53106	5e-05	0.000627385
XM_001119906.3	724150	-	9077	8.00877	3.26477	1.2946	5e-05	0.000627385
XM_001119907.3	724151	-	1304	20.498	32.4293	-0.661814	0.00015	0.00171726
XM_001119908.3	724152	-	1504	28.4305	17.3415	0.713208	0.0001	0.00119145
XM_001119910.3	724154	-	2014	61.3782	14.3057	2.10114	0.0008	0.00765733
XM_001119914.3	724158	-	838	11.94	6.83699	0.80437	0.00195	0.0166197
XM_001119915.3	724160	-	2722	70.6294	25.6615	1.46066	5e-05	0.000627385
XM_001119919.3	724164	-	831	14.3172	28.8692	-1.01179	5e-05	0.000627385
XM_001119921.3	724166	-	1127	10.2968	17.2719	-0.746236	0.0004	0.00415277
XM_001119922.3	724167	-	1525	11.2004	22.9061	-1.03219	5e-05	0.000627385
XM_001119928.3	724175	-	1667	0.317522	1.4053	-2.14595	5e-05	0.000627385
XM_001119931.3	724178	-	5064	8.48238	4.75765	0.83422	5e-05	0.000627385
XM_001119937.3	724625	-	707	26.2854	51.5435	-0.971531	5e-05	0.000627385
XM_001119958.3	724453	-	2947	84.1519	38.3912	1.13222	5e-05	0.000627385
XM_001119962.3	724192	-	6489	268.989	69.9122	1.94393	5e-05	0.000627385
XM_001119963.3	724193	-	3132	249.109	43.3744	2.52186	5e-05	0.000627385
XM_001119966.3	724196	-	4452	2.73162	5.95538	-1.12444	5e-05	0.000627385
XM_001119973.2	724203	-	1287	24.647	44.123	-0.840117	5e-05	0.000627385
XM_001119978.3	724208	-	1440	7.54769	79.2528	-3.39236	5e-05	0.000627385
XM_001119986.3	724216	-	1264	0.164375	1.50431	-3.19405	5e-05	0.000627385
XM_001119990.3	724221	-	612	179.362	101.657	0.819159	5e-05	0.000627385
XM_001119998.3	724486	-	842	66.8376	42.6677	0.647517	0.00015	0.00171726
XM_001120009.3	724489	-	457	31.6706	63.951	-1.01382	5e-05	0.000627385
XM_001120014.3	724869	-	547	604.176	164.056	1.88078	5e-05	0.000627385
XM_001120020.3	725573	-	683	0.340845	3.54838	-3.37997	0.0001	0.00119145
XM_001120032.3	724239	-	2170	0.260321	1.02906	-1.98296	5e-05	0.000627385
XM_001120043.3	724250	-	1273	3.74536	135.654	-5.17868	5e-05	0.000627385
XM_001120045.3	724252	-	5631	0.298027	1.47384	-2.30607	5e-05	0.000627385
XM_001120054.3	724262	-	976	7.35299	11.9432	-0.699783	0.0033	0.0260853
XM_001120059.3	724267	-	1435	11.4302	18.5208	-0.696296	0.0066	0.0469443
XM_001120069.3	725184	-	1314	180.982	249.107	-0.460925	0.0008	0.00765733
XM_001120086.3	724280	-	935	10.6751	17.0173	-0.672758	0.00235	0.0195215
XM_001120099.3	724295	-	2778	25.8095	12.7988	1.0119	0.00685	0.0484114
XM_001120100.3	724296	-	3037	8.26246	13.853	-0.745554	5e-05	0.000627385
XM_001120101.3	724297	-	1389	4.31929	0.723369	2.57799	5e-05	0.000627385
XM_001120112.3	724308	-	2367	3.97414	8.1774	-1.041	0.0002	0.00222634
XM_001120114.3	724310	-	3174	1.53906	2.51354	-0.707667	0.00345	0.0271031
XM_001120116.3	724312	-	1641	0.388722	1.97159	-2.34255	5e-05	0.000627385
XM_001120132.3	725272	-	647	1885.4	986.764	0.934095	5e-05	0.000627385
XM_001120134.3	725565	-	1152	44.0552	19.7008	1.16106	5e-05	0.000627385
XM_001120136.3	724899	-	1786	0.395176	2.25924	-2.51527	5e-05	0.000627385
XM_001120137.3	724449	-	1347	7.53387	34.3865	-2.19038	5e-05	0.000627385
XM_001120140.3	725038	-	997	452.625	199.016	1.18543	5e-05	0.000627385
XM_001120149.3	724328	-	1717	20.7672	10.4575	0.989766	5e-05	0.000627385
XM_001120153.3	724332	-	2170	54.817	29.1734	0.909968	5e-05	0.000627385
XM_001120159.3	724338	-	2365	156.121	55.9755	1.4798	5e-05	0.000627385
XM_001120171.3	724350	-	1042	13.0966	19.567	-0.579229	0.00435	0.0329738
XM_001120173.3	724352	-	591	32.4313	53.8571	-0.731748	0.0002	0.00222634
XM_001120174.3	724353	-	1849	552.29	72.3494	2.93237	5e-05	0.000627385
XM_001120177.3	724356	-	5726	11.4102	31.0783	-1.44559	0.00025	0.00272364
XM_001120186.3	725308	-	658	517.971	840.742	-0.698793	5e-05	0.000627385
XM_001120194.3	724488	-	872	9.61335	73.1149	-2.92705	5e-05	0.000627385
XM_001120198.3	725311	-	2221	182.753	134.395	0.443418	0.00155	0.0136406
XM_001120210.3	724375	-	3417	39.856	27.1783	0.552344	5e-05	0.000627385
XM_001120213.3	724378	-	1333	9.01155	31.6603	-1.81283	5e-05	0.000627385
XM_001120215.3	724380	-	2131	27.9079	17.1466	0.702753	5e-05	0.000627385
XM_001120217.3	724382	-	1017	1.13908	0.189039	2.59112	0.0007	0.006805
XM_001120227.3	724393	-	1018	0.223358	1.5164	-2.76322	0.00055	0.00549577
XM_001120233.3	724399	-	1450	8.74376	17.3761	-0.99078	5e-05	0.000627385
XM_001120239.3	726034	-	1584	11.7992	19.9877	-0.760421	0.0001	0.00119145
XM_001120247.3	724947	-	3553	39.1996	26.954	0.540341	0.00035	0.00368417
XM_001120248.3	725037	-	2115	14.8967	7.81885	0.929968	5e-05	0.000627385
XM_001120293.3	724436	-	852	0.210603	1.90806	-3.17951	0.0006	0.00594174
XM_001120296.3	724439	-	3605	25.0997	5.38534	2.22056	5e-05	0.000627385
XM_001120297.3	724440	-	3725	66.3134	40.9231	0.696386	5e-05	0.000627385
XM_001120306.3	725099	-	2038	161.763	22.1654	2.8675	5e-05	0.000627385
XM_001120311.3	725146	-	1287	32.4412	47.0747	-0.537126	0.0006	0.00594174
XM_001120319.3	724457	-	1253	43.0074	26.1818	0.71602	5e-05	0.000627385
XM_001120328.3	724466	-	1778	0.648773	8.23986	-3.66684	5e-05	0.000627385
XM_001120351.3	725309	-	765	46.2914	418.974	-3.17804	5e-05	0.000627385
XM_001120353.3	725717	-	2180	20.2335	10.8139	0.90386	5e-05	0.000627385
XM_001120355.3	725678	-	799	29.9004	47.7134	-0.674232	0.00025	0.00272364
XM_001120390.3	724516	-	921	30.4601	11.3693	1.42178	5e-05	0.000627385
XM_001120391.3	724517	-	5950	222.336	70.4334	1.65841	5e-05	0.000627385
XM_001120426.3	724537	-	5494	80.3956	31.5485	1.34954	5e-05	0.000627385
XM_001120429.3	724540	-	1356	30.9706	53.8953	-0.799262	5e-05	0.000627385
XM_001120432.2	724543	-	724	6.58173	0.803812	3.03354	5e-05	0.000627385
XM_001120437.3	724548	-	5542	2.58027	11.5178	-2.15827	5e-05	0.000627385
XM_001120439.3	724550	-	1788	5.47842	17.258	-1.65543	0.0005	0.00505175
XM_001120442.3	724552	-	2114	14.017	3.44825	2.02324	5e-05	0.000627385
XM_001120447.3	724558	-	1362	6.56389	13.6489	-1.05616	5e-05	0.000627385
XM_001120449.3	724560	-	1745	0.70292	5.63732	-3.00358	5e-05	0.000627385
XM_001120452.3	724563	-	5151	0.470546	4.45658	-3.24353	5e-05	0.000627385
XM_001120465.3	724575	-	588	0.409888	3.84567	-3.22993	0.0005	0.00505175
XM_001120472.3	725183	-	1263	5.72758	12.0909	-1.07792	5e-05	0.000627385
XM_001120482.3	724585	-	1229	16.5045	47.3495	-1.52049	5e-05	0.000627385
XM_001120491.3	724594	-	4476	22.7804	8.48672	1.42452	5e-05	0.000627385
XM_001120497.3	724600	-	821	6.49575	11.8535	-0.867749	0.0009	0.00850416
XM_001120503.3	724608	-	3682	26.6901	17.2277	0.631573	0.0001	0.00119145
XM_001120524.3	726013	-	533	462.06	665.941	-0.527315	0.0001	0.00119145
XM_001120529.2	724638	-	419	65.4239	98.6637	-0.592702	0.00225	0.0188021
XM_001120535.3	724644	-	1260	29.2808	13.5269	1.11413	5e-05	0.000627385
XM_001120568.3	726297	-	411	323.141	216	0.581131	0.0002	0.00222634
XM_001120574.3	724683	-	1550	60.1279	36.4714	0.721269	5e-05	0.000627385
XM_001120576.3	724685	-	2442	45.3632	22.5884	1.00594	5e-05	0.000627385
XM_001120578.3	724687	-	3274	114.759	23.0185	2.31774	5e-05	0.000627385
XM_001120589.3	724698	-	1894	0.0843739	0.928089	-3.45939	0.0002	0.00222634
XM_001120612.3	724720	-	981	52.7804	35.903	0.555898	0.0007	0.006805
XM_001120613.3	724721	-	1137	2.62826	148.7	-5.82215	5e-05	0.000627385
XM_001120633.3	724741	-	2199	48.6782	65.928	-0.437615	0.0017	0.0147499
XM_001120636.3	724744	-	591	242.841	162.721	0.577613	0.0001	0.00119145
XM_001120644.3	724752	-	4578	639.625	23.4154	4.7717	5e-05	0.000627385
XM_001120653.3	725568	-	611	84.2431	55.5322	0.601233	0.00095	0.00890592
XM_001120657.3	724760	-	1932	2.13546	35.5275	-4.05632	5e-05	0.000627385
XM_001120658.3	724761	-	4060	0.657847	3.74008	-2.50725	5e-05	0.000627385
XM_001120659.3	724762	-	1585	2.1952	4.69712	-1.09743	0.0001	0.00119145
XM_001120660.3	724763	-	6040	4.96957	7.90735	-0.670074	0.0001	0.00119145
XM_001120666.3	724769	-	1093	6.15073	10.1329	-0.720218	0.00295	0.0237238
XM_001120667.3	724770	-	2738	46.5561	28.1213	0.727308	0.0022	0.0184409
XM_001120677.3	724778	-	3506	4.97124	2.50663	0.987858	5e-05	0.000627385
XM_001120679.3	724780	-	2161	4.05903	7.40204	-0.866789	0.00015	0.00171726
XM_001120684.3	724785	-	2528	60.1031	30.355	0.985506	5e-05	0.000627385
XM_001120685.3	724786	-	676	18.3722	28.4826	-0.632559	0.0035	0.0274366
XM_001120695.3	726118	-	423	528.066	344.088	0.617941	5e-05	0.000627385
XM_001120697.3	724795	-	1858	10.1103	6.10685	0.727325	0.0005	0.00505175
XM_001120712.3	724810	-	4786	16.5563	8.89065	0.89702	5e-05	0.000627385
XM_001120720.3	724819	-	2854	42.8235	20.2055	1.08366	5e-05	0.000627385
XM_001120726.3	724825	-	1423	8.4464	12.9659	-0.618309	0.00255	0.0209604
XM_001120727.3	724826	-	2539	48.1959	25.5884	0.913421	5e-05	0.000627385
XM_001120736.3	724833	-	2586	13.8867	21.9916	-0.66325	0.00295	0.0237238
XM_001120738.3	724835	-	5457	2.85289	20.3485	-2.83443	0.00035	0.00368417
XM_001120746.3	724842	-	1399	4.92863	11.0805	-1.16876	5e-05	0.000627385
XM_001120754.3	724850	-	1326	10.3632	20.2356	-0.965426	0.00495	0.0368224
XM_001120755.3	724851	-	4329	9.44973	6.19654	0.608812	0.0007	0.006805
XM_001120760.3	724856	-	1350	27.5355	14.577	0.917597	5e-05	0.000627385
XM_001120765.3	724862	-	1534	6.75731	2.97113	1.18544	0.00045	0.00460371
XM_001120768.3	724865	-	1977	18.7737	9.12758	1.04041	0.00015	0.00171726
XM_001120770.3	724867	-	1866	8.60466	0.143649	5.9045	0.00475	0.0355475
XM_001120785.3	724885	-	5974	6.90518	13.5544	-0.973009	0.00065	0.00638377
XM_001120790.3	724890	-	3558	9.59106	3.4055	1.49382	5e-05	0.000627385
XM_001120800.3	726521	-	595	6.23245	13.3563	-1.09965	0.00035	0.00368417
XM_001120804.3	724903	-	3681	0.597372	5.70486	-3.25549	5e-05	0.000627385
XM_001120814.3	724914	-	2656	5.95399	2.39343	1.31478	5e-05	0.000627385
XM_001120817.3	724917	-	2286	0.786828	0.0636339	3.62818	0.0028	0.0226888
XM_001120821.3	724921	-	1636	71.0196	14.1788	2.32448	5e-05	0.000627385
XM_001120829.3	724929	-	6790	48.5233	21.0687	1.20358	5e-05	0.000627385
XM_001120831.3	724931	-	1442	33.1291	20.2338	0.711327	0.00015	0.00171726
XM_001120833.3	724934	-	4625	0.736641	3.64366	-2.30635	5e-05	0.000627385
XM_001120836.3	724937	-	3690	31.9641	23.8276	0.423816	0.00285	0.0230215
XM_001120838.3	724939	-	650	9.12651	18.5768	-1.02536	5e-05	0.000627385
XM_001120846.3	726486	-	1286	44.4369	18.8032	1.24078	5e-05	0.000627385
XM_001120848.3	726429	-	853	0.734784	2.81769	-1.93912	5e-05	0.000627385
XM_001120860.3	724959	-	6462	62.1533	38.1122	0.705578	5e-05	0.000627385
XM_001120871.3	724971	-	8967	3.66254	30.5259	-3.05912	5e-05	0.000627385
XM_001120874.3	724974	-	1941	3.74435	8.47433	-1.17839	5e-05	0.000627385
XM_001120875.3	724975	-	4067	5.47282	29.2452	-2.41784	5e-05	0.000627385
XM_001120877.3	724977	-	1364	73.0696	34.5425	1.0809	5e-05	0.000627385
XM_001120879.2	724979	-	2949	0.443714	1.46307	-1.7213	5e-05	0.000627385
XM_001120887.2	724987	-	1217	100.623	190.479	-0.920678	5e-05	0.000627385
XM_001120892.3	726721	-	507	116.55	189.118	-0.698333	0.00035	0.00368417
XM_001120913.3	725011	-	1103	3.77323	7.17871	-0.927923	0.0019	0.0162503
XM_001120914.3	725012	-	2556	39.7488	16.7439	1.24727	5e-05	0.000627385
XM_001120925.3	725023	-	2080	65.6923	25.7752	1.34974	5e-05	0.000627385
XM_001120927.3	725025	-	901	116.262	29.0122	2.00265	5e-05	0.000627385
XM_001120933.3	725032	-	467	18.0735	38.5488	-1.09281	5e-05	0.000627385
XM_001120937.3	725041	-	2891	0.106511	1.56138	-3.87375	0.0003	0.00321156
XM_001120940.3	725044	-	2105	25.5726	10.0851	1.34238	0.0001	0.00119145
XM_001120944.3	725048	-	7547	46.0258	30.3416	0.601144	0.0001	0.00119145
XM_001120949.3	725053	-	2461	0.36987	2.62768	-2.8287	5e-05	0.000627385
XM_001120953.3	725057	-	3299	158.608	78.0054	1.02382	5e-05	0.000627385
XM_001120955.3	725059	-	411	79.612	45.291	0.813761	0.0004	0.00415277
XM_001120957.3	725061	-	5184	85.0474	45.1884	0.912314	5e-05	0.000627385
XM_001120991.3	725106	-	2968	15.1812	210.247	-3.79173	5e-05	0.000627385
XM_001121000.3	725115	-	2474	52.1609	19.7389	1.40193	5e-05	0.000627385
XM_001121007.3	725122	-	2319	44.7243	84.8117	-0.923203	0.00425	0.0323387
XM_001121010.3	725125	-	2311	2.33124	8.74621	-1.90756	5e-05	0.000627385
XM_001121011.3	725127	-	2372	88.304	4.37979	4.33354	5e-05	0.000627385
XM_001121014.3	725130	-	2922	9.63952	24.788	-1.36261	5e-05	0.000627385
XM_001121024.3	725140	-	731	1.2844	4.74239	-1.88452	5e-05	0.000627385
XM_001121032.3	725154	-	2275	2.05287	7.54898	-1.87864	5e-05	0.000627385
XM_001121035.3	725157	-	1686	0.422061	1.27996	-1.60058	0.00045	0.00460371
XM_001121037.3	725159	-	2907	0.152414	0.902332	-2.56566	5e-05	0.000627385
XM_001121052.3	725174	-	2658	68.967	37.7362	0.869956	5e-05	0.000627385
XM_001121061.3	726978	-	1034	3.8731	35.8514	-3.21047	5e-05	0.000627385
XM_001121066.3	725191	-	2020	88.5926	12.4453	2.83158	5e-05	0.000627385
XM_001121096.3	725219	-	1473	2.89466	6.13611	-1.08393	5e-05	0.000627385
XM_001121102.3	725225	-	1134	27.1607	4.32714	2.65004	5e-05	0.000627385
XM_001121113.3	725240	-	536	12.1008	27.6331	-1.1913	0.0005	0.00505175
XM_001121117.3	725245	-	3390	25.7268	139.474	-2.43865	5e-05	0.000627385
XM_001121126.3	725254	-	2072	26.1619	14.0207	0.899913	0.00025	0.00272364
XM_001121130.3	725258	-	1841	37.0387	13.3443	1.47281	5e-05	0.000627385
XM_001121132.3	725260	-	3072	10.4284	5.54174	0.912106	5e-05	0.000627385
XM_001121136.3	725264	-	3083	0.216662	1.98348	-3.19452	5e-05	0.000627385
XM_001121139.3	725267	-	1222	7.9034	20.6532	-1.38582	5e-05	0.000627385
XM_001121142.3	725270	-	2990	32.6608	2.84773	3.51968	5e-05	0.000627385
XM_001121144.2	726894	-	812	8.47293	14.3438	-0.759496	0.0017	0.0147499
XM_001121146.3	725278	-	1172	5.95779	9.6335	-0.693282	0.0041	0.0313827
XM_001121155.3	725287	-	2426	29.1832	20.5208	0.508053	0.0011	0.0101285
XM_001121177.3	725317	-	2670	29.743	15.7717	0.915216	5e-05	0.000627385
XM_001121178.3	725318	-	4644	0.955072	4.6738	-2.29091	5e-05	0.000627385
XM_001121184.3	725324	-	3497	22.266	8.68879	1.35761	5e-05	0.000627385
XM_001121187.3	725327	-	1854	22.7558	6.00744	1.92141	5e-05	0.000627385
XM_001121188.3	725328	-	1610	23.1247	37.1466	-0.683795	5e-05	0.000627385
XM_001121211.3	725351	-	1390	0.455758	4.05036	-3.15171	0.00015	0.00171726
XM_001121212.3	725352	-	499	81.3566	42.8887	0.923663	0.0028	0.0226888
XM_001121241.3	725387	-	1458	8.73687	73.1213	-3.0651	5e-05	0.000627385
XM_001121248.3	725393	-	4566	99.2161	61.5912	0.68785	5e-05	0.000627385
XM_001121250.3	725396	-	1298	279.035	101.431	1.45995	5e-05	0.000627385
XM_001121251.3	725397	-	2105	112.757	48.745	1.20989	5e-05	0.000627385
XM_001121263.3	725409	-	1016	14.5236	27.9662	-0.94529	5e-05	0.000627385
XM_001121268.3	726962	-	748	39.7948	24.5866	0.694708	0.0005	0.00505175
XM_001121270.3	725419	-	2024	55.5706	30.2767	0.876113	5e-05	0.000627385
XM_001121271.3	725420	-	2570	0.562376	0.15862	1.82596	0.0024	0.0198832
XM_001121284.3	725434	-	4725	0.324703	1.56869	-2.27237	5e-05	0.000627385
XM_001121298.3	725455	-	1447	0.237627	2.07967	-3.12958	5e-05	0.000627385
XM_001121305.3	725462	-	2246	65.6993	11.2754	2.54271	5e-05	0.000627385
XM_001121316.3	725474	-	2970	204.885	32.9096	2.63824	5e-05	0.000627385
XM_001121319.3	725477	-	2831	13.9347	28.7008	-1.04241	5e-05	0.000627385
XM_001121331.3	725494	-	3409	75.5818	33.2245	1.18579	0.00045	0.00460371
XM_001121334.3	725497	-	2144	17.9966	10.4342	0.786404	0.00135	0.0120939
XM_001121335.3	725498	-	2207	1.07138	8.64018	-3.01159	0.0003	0.00321156
XM_001121339.3	725502	-	1637	2.87601	5.35279	-0.896224	0.0005	0.00505175
XM_001121347.3	725510	-	2753	47.3834	33.8967	0.483238	0.00055	0.00549577
XM_001121355.3	725518	-	3916	12.131	21.0754	-0.796868	5e-05	0.000627385
XM_001121362.3	725527	-	1246	15.368	6.97481	1.1397	5e-05	0.000627385
XM_001121381.3	725548	-	1386	37.4083	65.4006	-0.805945	5e-05	0.000627385
XM_001121384.3	725551	-	2946	22.3499	30.496	-0.448349	0.0025	0.020608
XM_001121410.3	725586	-	2519	261.328	65.8075	1.98954	5e-05	0.000627385
XM_001121426.3	725599	-	3536	16.1083	21.7017	-0.430011	0.00405	0.0310638
XM_001121446.3	725619	-	4159	5.32301	9.29974	-0.804949	5e-05	0.000627385
XM_001121462.3	725633	-	572	13.0835	22.8402	-0.803832	0.0013	0.011703
XM_001121463.3	725634	-	4516	11.8936	26.9612	-1.18069	5e-05	0.000627385
XM_001121467.3	725638	-	1396	13.8614	20.9282	-0.594378	0.0011	0.0101285
XM_001121471.3	725649	-	1839	2.35527	1.22883	0.938602	0.0023	0.01916
XM_001121473.3	725651	-	4363	8.2623	16.501	-0.997937	5e-05	0.000627385
XM_001121476.3	725654	-	3323	34.628	18.6055	0.896213	5e-05	0.000627385
XM_001121483.3	725661	-	1455	42.224	60.5907	-0.521032	0.0008	0.00765733
XM_001121491.3	725669	-	1007	35.3914	48.8275	-0.464294	0.005	0.037132
XM_001121498.3	725676	-	1043	0.678287	1.5276	-1.1713	0.0048	0.0358743
XM_001121503.3	725686	-	1967	129.267	29.9965	2.10748	5e-05	0.000627385
XM_001121507.3	725690	-	1146	0.51637	3.99168	-2.95052	5e-05	0.000627385
XM_001121513.3	725696	-	2454	74.7252	32.7683	1.18929	5e-05	0.000627385
XM_001121522.3	725705	-	445	295.52	151.829	0.960809	0.0012	0.01092
XM_001121525.3	725708	-	4012	55.6597	5.65296	3.29955	5e-05	0.000627385
XM_001121554.3	725745	-	1320	18.167	34.6264	-0.930551	5e-05	0.000627385
XM_001121565.3	725756	-	2486	0.516728	3.59666	-2.79918	5e-05	0.000627385
XM_001121566.3	725757	-	2373	16.3972	3.69073	2.15147	5e-05	0.000627385
XM_001121570.3	725761	-	3240	85.6579	30.8204	1.4747	5e-05	0.000627385
XM_001121573.3	725764	-	1156	8.2719	19.8079	-1.25979	5e-05	0.000627385
XM_001121575.3	725766	-	1880	250.718	12.8092	4.29081	5e-05	0.000627385
XM_001121584.3	725777	-	3042	63.7597	44.0292	0.534184	0.00015	0.00171726
XM_001121591.3	725784	-	1730	205.156	27.7554	2.88588	5e-05	0.000627385
XM_001121593.3	725786	-	1606	72.7599	51.9391	0.486321	0.00065	0.00638377
XM_001121596.3	725789	-	1831	29.6944	19.7532	0.588107	0.0002	0.00222634
XM_001121598.3	725791	-	1173	54.7938	5.40287	3.34222	5e-05	0.000627385
XM_001121602.3	725795	-	3387	34.4955	21.696	0.66898	5e-05	0.000627385
XM_001121619.3	725817	-	1631	62.3816	15.8538	1.97629	5e-05	0.000627385
XM_001121637.3	725835	-	514	105.965	64.1373	0.724351	0.00035	0.00368417
XM_001121644.3	725841	-	3436	287.269	41.7285	2.7833	5e-05	0.000627385
XM_001121647.3	725844	-	3149	3.76361	25.0107	-2.73236	5e-05	0.000627385
XM_001121654.3	725855	-	1310	5.41404	10.6431	-0.975144	0.00235	0.0195215
XM_001121657.3	725859	-	1180	75.4371	30.3951	1.31144	5e-05	0.000627385
XM_001121690.3	725896	-	2341	28.8712	10.551	1.45225	5e-05	0.000627385
XM_001121692.3	725898	-	1871	10.352	16.3959	-0.663424	0.0028	0.0226888
XM_001121700.3	725906	-	601	33.6154	20.8421	0.689621	0.0015	0.0132566
XM_001121704.3	725910	-	3916	7.18873	28.0095	-1.96211	5e-05	0.000627385
XM_001121709.3	725922	-	2208	0.197569	1.44293	-2.86857	5e-05	0.000627385
XM_001121713.3	725926	-	1595	5.36619	10.5201	-0.971174	0.00095	0.00890592
XM_001121718.3	725930	-	1237	8.03971	12.4585	-0.631911	0.0038	0.0294235
XM_001121733.3	725947	-	321	88.2018	211.867	-1.26428	5e-05	0.000627385
XM_001121735.3	725949	-	2985	5.45771	13.4606	-1.30238	5e-05	0.000627385
XM_001121746.3	725960	-	2917	2.64295	28.1224	-3.4115	0.0002	0.00222634
XM_001121747.3	725961	-	1073	55.7086	28.2306	0.980639	0.0001	0.00119145
XM_001121751.3	725965	-	1916	0.240526	0.794207	-1.72332	0.00045	0.00460371
XM_001121757.3	725973	-	753	1.05091	4.90925	-2.22386	5e-05	0.000627385
XM_001121758.3	725974	-	2209	29.5251	6.54319	2.17387	5e-05	0.000627385
XM_001121762.3	725982	-	3577	40.2894	17.4348	1.20843	5e-05	0.000627385
XM_001121774.3	725992	-	2915	8.48975	14.138	-0.735788	5e-05	0.000627385
XM_001121781.3	726000	-	1229	83.7196	59.962	0.481517	0.00155	0.0136406
XM_001121788.3	726007	-	2605	38.61	18.7281	1.04377	5e-05	0.000627385
XM_001121796.3	726020	-	1280	1.2778	3.82875	-1.58321	5e-05	0.000627385
XM_001121803.3	726027	-	1449	93.0898	34.0917	1.4492	5e-05	0.000627385
XM_001121814.3	726040	-	2711	92.05	22.8349	2.01118	5e-05	0.000627385
XM_001121825.3	726050	-	2032	0.203213	2.91643	-3.84314	5e-05	0.000627385
XM_001121826.3	726051	-	2793	28.758	19.7069	0.545267	0.00065	0.00638377
XM_001121829.3	726054	-	725	19.9767	57.6709	-1.52953	5e-05	0.000627385
XM_001121833.3	726063	-	3524	84.8823	27.1421	1.64493	5e-05	0.000627385
XM_001121838.3	726068	-	5941	13.9409	21.4085	-0.618864	5e-05	0.000627385
XM_001121847.3	726076	-	2386	0.665115	1.60938	-1.27483	0.00025	0.00272364
XM_001121853.3	726081	-	1981	50.6036	31.4774	0.684923	5e-05	0.000627385
XM_001121859.3	726092	-	1209	3.39757	8.34726	-1.2968	5e-05	0.000627385
XM_001121862.3	726095	-	1576	3.65012	15.079	-2.04652	5e-05	0.000627385
XM_001121864.3	726097	-	2265	0.213001	1.0193	-2.25864	0.00025	0.00272364
XM_001121873.3	726107	-	1141	3.52855	18.8825	-2.4199	0.0023	0.01916
XM_001121888.3	726126	-	1849	0.513436	17.1238	-5.05967	5e-05	0.000627385
XM_001121890.3	726128	-	3754	65.4535	45.0691	0.538333	0.0052	0.0383638
XM_001121896.3	726133	-	3637	41.7438	20.1561	1.05035	5e-05	0.000627385
XM_001121912.3	726152	-	8505	0.461687	3.11507	-2.75428	5e-05	0.000627385
XM_001121918.3	726158	-	2968	1.2572	4.39552	-1.80582	5e-05	0.000627385
XM_001121921.3	726161	-	1861	6.90387	4.30138	0.682604	0.00215	0.0180806
XM_001121924.3	726164	-	823	41.6016	57.8502	-0.475683	0.00515	0.0380683
XM_001121935.3	726178	-	3072	75.5244	39.6709	0.928862	5e-05	0.000627385
XM_001121937.3	726180	-	5921	19.1474	5.34405	1.84114	5e-05	0.000627385
XM_001121941.3	726184	-	4299	56.4923	37.7114	0.583052	5e-05	0.000627385
XM_001121944.3	726188	-	5000	8.1258	4.08573	0.991915	5e-05	0.000627385
XM_001121946.3	726190	-	3186	45.6414	23.7439	0.942787	5e-05	0.000627385
XM_001121958.3	726204	-	3527	17.4549	4.59323	1.92605	5e-05	0.000627385
XM_001121969.3	726213	-	1436	11.5396	21.7595	-0.915051	5e-05	0.000627385
XM_001121977.3	726220	-	755	14.2967	22.8575	-0.676984	0.0023	0.01916
XM_001121993.3	726237	-	2300	6.91071	2.96341	1.22157	0.0016	0.0140101
XM_001122002.3	726247	-	2252	0.886017	1.78917	-1.01388	0.0033	0.0260853
XM_001122008.3	726253	-	758	5.73466	12.4878	-1.12274	0.0001	0.00119145
XM_001122025.3	726273	-	4273	40.5769	13.7064	1.56581	0.00205	0.0173499
XM_001122026.3	726275	-	2780	0.525596	1.88943	-1.84593	5e-05	0.000627385
XM_001122027.3	726276	-	1886	0.266018	2.04648	-2.94355	0.00215	0.0180806
XM_001122039.3	726288	-	2128	0.182177	0.980199	-2.42773	5e-05	0.000627385
XM_001122049.3	726301	-	1183	89.0046	59.6282	0.577885	0.0002	0.00222634
XM_001122051.3	726303	-	1058	9.04637	16.0121	-0.823753	0.0029	0.0233774
XM_001122055.3	726307	-	4662	54.7918	22.761	1.2674	0.00115	0.0105259
XM_001122056.3	726308	-	945	46.2747	29.8089	0.63448	0.0003	0.00321156
XM_001122057.3	726309	-	2883	196.188	575.414	-1.55236	5e-05	0.000627385
XM_001122061.3	726314	-	1082	17.7372	31.822	-0.843248	5e-05	0.000627385
XM_001122067.3	726320	-	1539	9.42281	5.26307	0.840254	0.0002	0.00222634
XM_001122074.3	726330	-	3583	45.893	16.4544	1.4798	5e-05	0.000627385
XM_001122081.3	726336	-	2639	95.8638	62.4782	0.617632	0.0001	0.00119145
XM_001122083.3	726338	-	2193	28.3431	18.095	0.647408	5e-05	0.000627385
XM_001122095.3	726352	-	1919	0.155656	1.40558	-3.17473	5e-05	0.000627385
XM_001122097.3	726354	-	5070	120.827	47.3341	1.35199	5e-05	0.000627385
XM_001122101.3	726358	-	9226	29.9087	21.7637	0.458641	0.0009	0.00850416
XM_001122102.3	726359	-	2951	27.6504	20.4005	0.4387	0.0029	0.0233774
XM_001122105.3	726362	-	1901	0.263404	0.669958	-1.34679	0.00325	0.0257619
XM_001122113.3	726370	-	3198	2.17444	0.58278	1.89962	5e-05	0.000627385
XM_001122118.3	726375	-	4242	1.08423	7.07239	-2.70553	0.00045	0.00460371
XM_001122133.3	726391	-	2760	0.642084	2.28772	-1.83308	5e-05	0.000627385
XM_001122141.3	726399	-	1958	42.1505	17.7577	1.2471	5e-05	0.000627385
XM_001122153.3	726416	-	3585	21.1157	14.5133	0.540937	0.0024	0.0198832
XM_001122154.3	726417	-	1861	7.10818	16.3515	-1.20188	5e-05	0.000627385
XM_001122155.3	726418	-	2375	7.99213	60.5887	-2.9224	5e-05	0.000627385
XM_001122156.3	726419	-	2723	30.9121	41.9833	-0.441643	0.00175	0.015129
XM_001122159.3	726422	-	2401	34.0175	16.2601	1.06494	5e-05	0.000627385
XM_001122160.3	726423	-	2925	4.08669	9.74482	-1.2537	0.00555	0.040572
XM_001122161.3	726424	-	1669	62.3824	16.6778	1.90321	5e-05	0.000627385
XM_001122176.3	726441	-	1550	6.1844	51.4265	-3.05581	5e-05	0.000627385
XM_001122194.3	726462	-	1363	1.5838	5.79751	-1.87204	5e-05	0.000627385
XM_001122195.3	726463	-	1260	0.831529	0.135754	2.61477	0.00215	0.0180806
XM_001122210.3	726478	-	3368	7.23301	1.27842	2.50023	5e-05	0.000627385
XM_001122218.3	726487	-	673	4109.55	331.346	3.63257	5e-05	0.000627385
XM_001122227.3	726495	-	1004	109.31	43.4509	1.33096	0.00155	0.0136406
XM_001122230.3	726498	-	461	68.0621	110.149	-0.694537	5e-05	0.000627385
XM_001122238.3	726506	-	2589	154.751	19.7854	2.96744	5e-05	0.000627385
XM_001122242.3	726510	-	3027	147.276	20.8009	2.8238	5e-05	0.000627385
XM_001122246.3	726514	-	5543	3.72991	8.71149	-1.22378	5e-05	0.000627385
XM_001122252.3	726523	-	2250	12.1862	20.8319	-0.773543	5e-05	0.000627385
XM_001122254.3	726525	-	2588	14.5777	22.8598	-0.649048	0.001	0.00932037
XM_001122258.3	726529	-	1220	154.616	19.6233	2.97805	5e-05	0.000627385
XM_001122259.3	726530	-	1088	3.13271	5.75674	-0.87784	0.00125	0.0113133
XM_001122263.3	726534	-	2778	8.02382	39.0396	-2.28258	5e-05	0.000627385
XM_001122273.3	726546	-	1076	18.5842	7.82479	1.24795	0.0038	0.0294235
XM_001122276.3	726548	-	5107	5.40439	1.00145	2.43204	0.00275	0.0223437
XM_001122278.2	726550	-	788	7.86194	16.8893	-1.10316	5e-05	0.000627385
XM_001122285.3	726558	-	1558	15.7362	29.6741	-0.915117	5e-05	0.000627385
XM_001122286.3	726559	-	1401	43.3738	30.5457	0.505856	0.0013	0.011703
XM_001122298.3	726570	-	2239	30.2479	60.2264	-0.993558	5e-05	0.000627385
XM_001122299.3	726571	-	1552	0.259422	4.44627	-4.09922	5e-05	0.000627385
XM_001122300.3	726572	-	1648	8.18313	19.8267	-1.27672	5e-05	0.000627385
XM_001122324.3	726597	-	4171	19.1105	4.58094	2.06065	5e-05	0.000627385
XM_001122325.3	726598	-	2818	45.4386	14.8634	1.61216	5e-05	0.000627385
XM_001122328.3	726601	-	2706	5.7747	12.43	-1.106	5e-05	0.000627385
XM_001122332.3	726605	-	768	9.08069	14.7605	-0.700864	0.00405	0.0310638
XM_001122336.3	726611	-	1056	1.14245	7.89088	-2.78806	5e-05	0.000627385
XM_001122341.3	726616	-	1490	152.645	86.6552	0.816825	5e-05	0.000627385
XM_001122345.3	726620	-	764	618.451	398.559	0.633867	5e-05	0.000627385
XM_001122377.3	726656	-	2468	9.26536	20.7156	-1.1608	0.00265	0.0216517
XM_001122379.3	726658	-	1006	72.2388	3.50084	4.367	5e-05	0.000627385
XM_001122382.3	726661	-	1657	14.1703	7.79141	0.862911	0.00155	0.0136406
XM_001122385.3	726664	-	1939	35.7961	20.0297	0.837659	5e-05	0.000627385
XM_001122391.3	726669	-	1573	54.0333	12.6123	2.09902	0.0002	0.00222634
XM_001122401.3	726679	-	2309	35.521	4.85034	2.87252	5e-05	0.000627385
XM_001122405.3	726682	-	2543	22.4037	15.1526	0.564164	0.0009	0.00850416
XM_001122415.3	726694	-	2338	93.5494	42.4166	1.1411	5e-05	0.000627385
XM_001122418.3	726696	-	925	5.42015	36.6463	-2.75726	5e-05	0.000627385
XM_001122422.3	726699	-	4003	1.08916	5.63332	-2.37077	5e-05	0.000627385
XM_001122432.3	726709	-	13179	5.78672	11.5204	-0.993375	0.0003	0.00321156
XM_001122434.3	726711	-	574	40.9916	76.5186	-0.900483	5e-05	0.000627385
XM_001122441.3	726718	-	1098	4.34083	7.81185	-0.847695	0.0011	0.0101285
XM_001122450.3	726729	-	2278	26.6588	14.371	0.891447	5e-05	0.000627385
XM_001122454.3	726733	-	1054	314.055	112.798	1.47727	5e-05	0.000627385
XM_001122457.3	726736	-	5798	23.6617	50.0003	-1.07938	5e-05	0.000627385
XM_001122470.3	726750	-	4687	0.226538	3.88991	-4.10191	5e-05	0.000627385
XM_001122476.3	726756	-	2702	36.5816	14.9663	1.28941	5e-05	0.000627385
XM_001122504.3	726782	-	963	71.0444	28.9826	1.29353	5e-05	0.000627385
XM_001122522.3	726801	-	2275	36.0713	15.2231	1.24459	5e-05	0.000627385
XM_001122532.3	726811	-	1072	4.87146	8.35107	-0.777606	0.00335	0.026426
XM_001122533.3	726812	-	1964	67.9236	36.4098	0.899586	5e-05	0.000627385
XM_001122536.2	726815	-	1733	5.86017	10.958	-0.902965	0.0007	0.006805
XM_001122547.3	726828	-	1271	51.3905	35.0176	0.553422	0.0013	0.011703
XM_001122551.3	726833	-	1966	25.1796	36.1138	-0.520293	0.00055	0.00549577
XM_001122554.3	726836	-	777	4.86433	15.8719	-1.70616	5e-05	0.000627385
XM_001122556.3	726838	-	1266	1.46948	2.79549	-0.92779	0.0042	0.0320253
XM_001122582.3	726866	-	1954	10.1472	53.2517	-2.39174	5e-05	0.000627385
XM_001122585.3	726869	-	1917	45.7996	33.3085	0.459444	0.00195	0.0166197
XM_001122591.3	726875	-	1242	31.5124	15.1119	1.06023	0.00015	0.00171726
XM_001122598.3	726882	-	5579	46.4508	28.0785	0.726237	5e-05	0.000627385
XM_001122612.3	726896	-	5587	0.665768	1.78437	-1.42233	5e-05	0.000627385
XM_001122625.3	726908	-	11268	14.6892	26.3949	-0.845499	5e-05	0.000627385
XM_001122629.3	726912	-	2196	69.5252	6.46135	3.42763	5e-05	0.000627385
XM_001122654.3	726937	-	692	0.23814	1.34033	-2.4927	0.00395	0.0303824
XM_001122664.3	726947	-	2184	56.7212	9.79803	2.53333	5e-05	0.000627385
XM_001122669.3	726952	-	2263	11.1428	19.0179	-0.771244	5e-05	0.000627385
XM_001122675.3	726958	-	1656	2.47782	14.3659	-2.53551	5e-05	0.000627385
XM_001122678.3	726961	-	1971	16.2052	22.3218	-0.461996	0.00625	0.0448285
XM_001122685.3	726969	-	987	91.5438	0.865983	6.72398	5e-05	0.000627385
XM_001122688.3	726972	-	6642	75.0166	22.344	1.74732	5e-05	0.000627385
XM_001122696.3	726981	-	1764	0.328443	1.07657	-1.71273	0.00025	0.00272364
XM_001122705.3	726991	-	3597	41.2363	7.58243	2.44318	5e-05	0.000627385
XM_001122709.3	726995	-	782	2.73637	0.791912	1.78885	0.0002	0.00222634
XM_001122713.3	726999	-	1216	106.13	49.0906	1.11231	5e-05	0.000627385
XM_001122724.3	727010	-	1509	0.16432	4.23456	-4.68763	5e-05	0.000627385
XM_001122734.3	727021	-	1454	57.0548	0.290963	7.61537	5e-05	0.000627385
XM_001122740.3	727027	-	2734	71.4257	94.6747	-0.406536	0.0034	0.0267578
XM_001122750.3	727038	-	933	49.8245	19.388	1.36169	5e-05	0.000627385
XM_001122763.3	727050	-	1286	6.93191	11.9231	-0.782438	0.0005	0.00505175
XM_001122788.3	727074	-	840	34.9194	50.2217	-0.524284	0.0033	0.0260853
XM_001122793.3	727079	-	1799	5.59618	13.6266	-1.28391	5e-05	0.000627385
XM_001122795.3	727081	-	2615	5.45685	24.2462	-2.15162	5e-05	0.000627385
XM_001122803.3	727090	-	771	8.1568	15.7908	-0.953007	0.0003	0.00321156
XM_001122804.3	727091	-	2163	18.9466	33.6232	-0.82752	5e-05	0.000627385
XM_001122824.3	727110	-	1723	0.127093	9.4677	-6.21906	0.00545	0.0399254
XM_001122827.3	727113	-	4652	35.2904	127.586	-1.85413	5e-05	0.000627385
XM_001122830.3	727116	-	1694	32.2815	21.077	0.615033	0.0001	0.00119145
XM_001122835.3	727121	-	2732	18.3384	5.65028	1.69847	5e-05	0.000627385
XM_001122842.3	727129	-	1241	14.6975	0.770807	4.25306	0.0002	0.00222634
XM_001122844.3	727131	-	2117	1.64046	3.48799	-1.08829	0.0001	0.00119145
XM_001122848.3	727135	-	4035	17.9661	37.8693	-1.07575	5e-05	0.000627385
XM_001122855.3	727142	-	728	10.8888	20.0757	-0.882603	0.00015	0.00171726
XM_001122865.3	727154	-	2443	3.40668	0.364741	3.22342	5e-05	0.000627385
XM_001122867.3	727156	-	496	9.43987	24.6494	-1.38472	5e-05	0.000627385
XM_001122876.3	727165	-	2195	0.416535	1.55848	-1.90363	5e-05	0.000627385
XM_001122910.3	727200	-	712	8.29626	13.9636	-0.751136	0.0036	0.0280992
XM_001122933.3	727223	-	7247	32.0921	20.9402	0.615945	0.0001	0.00119145
XM_001122944.3	727234	-	1115	3.75513	7.58557	-1.01439	0.00055	0.00549577
XM_001122949.3	727239	-	690	168.346	88.9241	0.920781	5e-05	0.000627385
XM_001122973.3	727263	-	2276	86.4447	63.3009	0.449552	0.00115	0.0105259
XM_001122979.3	727269	-	1789	9.37368	21.0451	-1.1668	5e-05	0.000627385
XM_001122985.3	727275	-	1653	101.458	71.5604	0.50365	0.0003	0.00321156
XM_001122987.3	727277	-	1283	8.05135	15.1251	-0.909646	5e-05	0.000627385
XM_001122993.3	727284	-	3948	2.69204	31.1352	-3.53177	5e-05	0.000627385
XM_001122997.3	727288	-	1534	24.6288	38.0187	-0.626363	0.0002	0.00222634
XM_001123008.3	727299	-	2775	104.243	56.2354	0.890405	5e-05	0.000627385
XM_001123009.3	727300	-	669	17.3213	34.742	-1.00413	5e-05	0.000627385
XM_001123019.3	727310	-	2094	20.3654	11.2852	0.85169	5e-05	0.000627385
XM_001123033.3	727324	-	1551	0.787706	3.5198	-2.15976	0.00015	0.00171726
XM_001123051.3	727342	-	973	37.2125	63.2572	-0.765443	5e-05	0.000627385
XM_001123053.3	727344	-	1582	0.0813504	0.498395	-2.61507	0.00625	0.0448285
XM_001123067.3	727358	-	1724	0.4049	1.46284	-1.85313	5e-05	0.000627385
XM_001123072.2	727363	-	1236	57.8177	26.012	1.15234	5e-05	0.000627385
XM_001123076.3	727367	-	595	0.932887	0	inf	5e-05	0.000627385
XM_001123118.3	727408	-	3785	0.237985	2.19416	-3.20473	5e-05	0.000627385
XM_001123122.3	727412	-	1132	2.32677	1.0162	1.19514	0.0012	0.01092
XM_001123124.3	727415	-	2408	21.25	40.0957	-0.915984	5e-05	0.000627385
XM_001123127.3	727419	-	762	12.9841	20.1922	-0.637052	0.0051	0.0377539
XM_001123131.3	727423	-	1392	9.66856	39.8174	-2.04203	5e-05	0.000627385
XM_001123151.3	727443	-	616	87.411	57.3997	0.606771	0.0006	0.00594174
XM_001123152.3	727444	-	1594	2.61404	4.83807	-0.888151	0.00065	0.00638377
XM_001123155.3	727447	-	5288	191.59	69.521	1.4625	5e-05	0.000627385
XM_001123157.3	727449	-	550	156.389	108.075	0.533107	0.00125	0.0113133
XM_001123172.3	727464	-	571	3.65298	0.792757	2.20412	0.00035	0.00368417
XM_001123195.3	727486	-	2954	38.8055	17.12	1.18058	5e-05	0.000627385
XM_001123196.3	727487	-	828	21.1068	5.63051	1.90637	5e-05	0.000627385
XM_001123202.3	727493	-	1149	1.39517	3.08184	-1.14335	0.00075	0.00723644
XM_001123207.3	727498	-	1497	28.2671	19.1361	0.562828	0.0016	0.0140101
XM_001123212.3	727502	-	1559	73.9603	19.546	1.91987	5e-05	0.000627385
XM_001123248.3	727539	-	1420	5.42135	10.2716	-0.921935	5e-05	0.000627385
XM_001123258.3	727549	-	768	65.6017	29.6001	1.14813	5e-05	0.000627385
XM_001123270.3	727561	-	1285	622.138	158.139	1.97604	5e-05	0.000627385
XM_001123287.3	727578	-	1166	1.15547	17.7932	-3.94478	5e-05	0.000627385
XM_001123301.3	727593	-	3682	23.5566	3.7709	2.64315	0.0004	0.00415277
XM_001123309.3	727601	-	479	1.00004	3.9619	-1.98613	0.00125	0.0113133
XM_001123354.3	727647	-	1689	2.6705	17.2352	-2.69018	0.0024	0.0198832
XM_003249035.2	413814	-	3622	31.6643	17.4401	0.860453	5e-05	0.000627385
XM_003249038.2	100578522	-	898	27.208	10.6315	1.35568	0.0018	0.0155092
XM_003249045.2	411557	-	4166	105.717	17.13	2.62562	5e-05	0.000627385
XM_003249048.2	726072	-	976	0.214808	1.51918	-2.82217	0.0006	0.00594174
XM_003249062.2	100578334	-	924	7.58151	0.234799	5.01299	5e-05	0.000627385
XM_003249064.2	100578600	-	5724	4.53478	10.8339	-1.25645	0.0034	0.0267578
XM_003249065.2	100578621	-	4428	3.4194	18.1909	-2.41141	0.00165	0.0143795
XM_003249067.2	100576370	-	4213	4.67225	2.4443	0.934694	0.00255	0.0209604
XM_003249071.2	100577060	-	1112	68.1163	43.8931	0.634007	5e-05	0.000627385
XM_003249075.2	100577504	-	3133	0.508409	3.52855	-2.79502	5e-05	0.000627385
XM_003249103.2	100576121	-	2255	3.60377	17.8987	-2.31227	5e-05	0.000627385
XM_003249104.2	412994	-	8538	0.272352	2.14237	-2.97566	5e-05	0.000627385
XM_003249105.2	100576457	-	810	64.6669	38.0802	0.763986	5e-05	0.000627385
XM_003249106.2	100576487	-	864	43.2429	17.3393	1.31841	5e-05	0.000627385
XM_003249124.2	100576722	-	4172	11.8892	6.7551	0.8156	5e-05	0.000627385
XM_003249142.2	100576359	-	2005	27.2574	19.4409	0.48755	0.00205	0.0173499
XM_003249144.2	100576614	-	1367	5.22565	1.83493	1.50989	5e-05	0.000627385
XM_003249148.2	100577147	-	3464	54.5559	3.06162	4.15537	5e-05	0.000627385
XM_003249150.2	100577300	-	1716	12.0866	19.2465	-0.671185	0.00025	0.00272364
XM_003249152.2	100577678	-	2407	23.7652	8.06503	1.5591	5e-05	0.000627385
XM_003249166.2	100576157	-	1901	10.1876	6.80637	0.581859	0.0061	0.0439284
XM_003249169.2	412896	-	4598	15.0323	2.11032	2.83253	5e-05	0.000627385
XM_003249170.2	412896	-	4686	4.06454	0.741249	2.45506	0.0055	0.0402605
XM_003249173.2	100576812	-	2061	39.0695	26.6759	0.550506	0.00025	0.00272364
XM_003249176.2	100576932	-	736	0.611057	2.33324	-1.93296	0.0007	0.006805
XM_003249180.2	726804	-	7437	169.44	70.1275	1.27272	5e-05	0.000627385
XM_003249185.2	408867	-	4374	9.9266	2.63448	1.91378	0.00135	0.0120939
XM_003249187.2	100578428	-	1253	23.9634	15.9364	0.588502	0.00115	0.0105259
XM_003249194.2	100576326	-	3323	16.9365	30.423	-0.84503	5e-05	0.000627385
XM_003249196.2	100576405	-	5095	25.6809	14.2621	0.848509	0.00105	0.00971924
XM_003249201.2	100577418	-	1257	1.97547	4.66046	-1.23828	5e-05	0.000627385
XM_003249216.2	100576111	-	2144	0.111482	0.546565	-2.29358	0.00095	0.00890592
XM_003249227.2	100576526	-	1936	13.5269	35.0279	-1.37267	5e-05	0.000627385
XM_003249233.2	100577024	-	1551	0.153286	0.781327	-2.3497	0.00075	0.00723644
XM_003249241.2	409954	-	921	1876.27	562.488	1.73797	5e-05	0.000627385
XM_003249248.2	100576158	-	1406	4.07237	0.375309	3.43972	5e-05	0.000627385
XM_003249254.2	100577120	-	3364	62.9756	19.8418	1.66625	5e-05	0.000627385
XM_003249256.2	100577638	-	2005	36.1454	10.415	1.79515	5e-05	0.000627385
XM_003249269.2	100576527	-	2314	29.9394	13.253	1.17572	5e-05	0.000627385
XM_003249273.2	724686	-	817	1.75052	5.46234	-1.64173	5e-05	0.000627385
XM_003249277.2	410103	-	1138	14.0784	42.5678	-1.59628	5e-05	0.000627385
XM_003249293.2	100578696	-	3526	12.4716	21.233	-0.767666	5e-05	0.000627385
XM_003249310.2	100577077	-	7808	29.5705	21.9172	0.432098	0.00095	0.00890592
XM_003249317.2	100578557	-	3179	0.153844	0.594991	-1.9514	5e-05	0.000627385
XM_003249319.2	100578989	-	926	23.8638	9.3737	1.34813	0.00115	0.0105259
XM_003249333.2	412345	-	1123	85.5396	49.4215	0.791455	5e-05	0.000627385
XM_003249334.2	100578006	-	1644	49.5177	29.4052	0.751874	5e-05	0.000627385
XM_003249337.2	725453	-	2308	0.183116	0.500965	-1.45195	0.00285	0.0230215
XM_003249352.2	100577596	-	899	156.001	7.64641	4.35063	5e-05	0.000627385
XM_003249355.2	100577982	-	1152	31.7073	44.2915	-0.482215	0.00385	0.0297521
XM_003249357.2	100578363	-	1386	39.1785	28.1344	0.477725	0.00335	0.026426
XM_003249360.2	100576137	-	688	12.4879	4.77979	1.38551	5e-05	0.000627385
XM_003249372.2	100578246	-	3532	66.5324	11.6485	2.51392	5e-05	0.000627385
XM_003249375.2	100578697	-	1095	6.96996	11.5005	-0.722472	0.00195	0.0166197
XM_003249379.2	100576289	-	652	8.5305	21.7482	-1.35019	5e-05	0.000627385
XM_003249381.2	100576406	-	1475	8.64688	3.19171	1.43785	5e-05	0.000627385
XM_003249382.2	724286	-	1865	5.60119	17.4281	-1.63761	5e-05	0.000627385
XM_003249393.2	552790	-	1636	9.60949	24.4497	-1.34729	5e-05	0.000627385
XM_003249397.2	100578498	-	4009	0.513509	1.34935	-1.3938	0.0007	0.006805
XM_003249398.2	100578537	-	3342	27.4577	12	1.19417	5e-05	0.000627385
XM_003249399.2	100578624	-	991	27.3982	40.3429	-0.558233	0.0026	0.0213034
XM_003249406.2	100577220	-	2820	59.9944	32.1889	0.898264	5e-05	0.000627385
XM_003249408.2	409590	-	1452	86.6694	38.4978	1.17075	5e-05	0.000627385
XM_003249412.2	100578784	-	610	20.1163	39.0998	-0.958795	0.0002	0.00222634
XM_003249415.2	727237	-	1967	6.4403	50.6263	-2.97469	5e-05	0.000627385
XM_003249416.2	552488	-	5115	12.9286	1.98302	2.70479	0.0014	0.0124897
XM_003249421.2	100577849	-	2631	58.0181	4.69455	3.62745	5e-05	0.000627385
XM_003249424.2	725925	-	2755	930.515	60.6105	3.94039	5e-05	0.000627385
XM_003249428.2	100578442	-	2264	179.485	19.4289	3.20759	5e-05	0.000627385
XM_003249434.2	100576736	-	820	1.28032	3.52921	-1.46284	0.00025	0.00272364
XM_003249439.2	100577695	-	1102	0.409584	1.9355	-2.24048	5e-05	0.000627385
XM_003249450.2	413799	-	875	61.4835	39.1544	0.651026	0.0003	0.00321156
XM_003249467.2	409370	-	5518	110.326	49.6872	1.15083	5e-05	0.000627385
XM_003249477.2	100576863	-	1641	39.9932	16.1195	1.31095	5e-05	0.000627385
XM_003249483.2	100577452	-	2883	44.981	16.4031	1.45535	5e-05	0.000627385
XM_003249489.2	100578051	-	3957	2.85596	7.48119	-1.38929	5e-05	0.000627385
XM_003249490.2	411658	-	1975	27.5408	19.6538	0.48676	0.0025	0.020608
XM_003249512.2	412524	-	2114	33.4861	17.5726	0.930236	5e-05	0.000627385
XM_003249518.2	100577098	-	1760	1.88221	0.620326	1.60133	0.00105	0.00971924
XM_003249520.2	100577221	-	2127	33.8027	17.2275	0.972421	5e-05	0.000627385
XM_003249527.2	100578137	-	960	0.231878	0.911269	-1.97451	0.00465	0.0349042
XM_003249537.2	100576864	-	2888	27.5176	9.82038	1.4865	5e-05	0.000627385
XM_003249547.2	724542	-	2300	33.0987	24.7178	0.421222	0.00625	0.0448285
XM_003249553.2	410479	-	2074	38.7293	8.27906	2.22589	5e-05	0.000627385
XM_003249567.2	100578068	-	7691	49.9729	17.7661	1.49202	5e-05	0.000627385
XM_003249582.2	100577149	-	2469	155.609	27.236	2.51434	5e-05	0.000627385
XM_003249599.2	100576615	-	2802	47.9199	9.96675	2.26543	5e-05	0.000627385
XM_003249605.2	100576934	-	2494	2.53473	7.00046	-1.46562	0.0015	0.0132566
XM_003249612.2	100577682	-	2397	1.57365	17.5962	-3.48308	5e-05	0.000627385
XM_003249616.2	724121	-	754	8.25531	1.63902	2.33249	0.0065	0.0463821
XM_003249618.2	100578443	-	1472	34.6814	20.8654	0.733049	0.0001	0.00119145
XM_003249622.2	725753	-	1396	6.7533	14.5892	-1.11123	5e-05	0.000627385
XM_003249629.2	100577543	-	2680	0.0946647	0.448634	-2.24464	0.001	0.00932037
XM_003249641.2	724405	-	1436	1.92201	4.24201	-1.14213	0.0002	0.00222634
XM_003249642.2	725191	-	2211	5.03363	1.316	1.93544	0.0039	0.0300614
XM_003249651.2	724383	-	3124	32.1281	20.7585	0.630134	5e-05	0.000627385
XM_003249652.2	100578773	-	1695	89.927	25.1321	1.83922	5e-05	0.000627385
XM_003249675.2	100576159	-	1620	1.11501	4.62892	-2.05362	5e-05	0.000627385
XM_003249676.2	100576221	-	1892	41.8077	23.4276	0.83556	5e-05	0.000627385
XM_003249685.2	726706	-	1860	43.2885	30.8608	0.488211	0.0012	0.01092
XM_003249707.2	100577341	-	862	30.3755	54.1116	-0.833027	0.00145	0.0128782
XM_003249716.2	100578848	-	1192	27.8922	18.2028	0.615705	0.00055	0.00549577
XM_003249731.2	100577885	-	1407	49.0174	27.5676	0.830318	5e-05	0.000627385
XM_003249736.2	551824	-	4548	51.2659	37.2849	0.459407	0.0005	0.00505175
XM_003249750.2	551219	-	2498	48.2003	23.0679	1.06316	5e-05	0.000627385
XM_003249751.2	724924	-	3796	4.38629	16.1814	-1.88327	5e-05	0.000627385
XM_003249754.2	100578822	-	2421	7.1323	0.977481	2.86723	5e-05	0.000627385
XM_003249756.2	100579058	-	1788	32.3568	2.80443	3.52829	5e-05	0.000627385
XM_003249764.2	726295	-	663	562.988	759.669	-0.432266	0.00075	0.00723644
XM_003249776.2	100578727	-	4238	311.267	36.0306	3.11086	5e-05	0.000627385
XM_003249777.2	100579003	-	2853	32.9389	22.7652	0.532961	0.0003	0.00321156
XM_003249834.2	100577408	-	2775	654.639	48.1957	3.76372	5e-05	0.000627385
XM_003249844.2	100578042	-	1319	15.4722	0.927473	4.06023	5e-05	0.000627385
XM_003249858.2	408391	-	2050	32.1579	13.8685	1.21336	5e-05	0.000627385
XM_003249869.2	552235	-	2522	51.9565	27.4903	0.91838	5e-05	0.000627385
XM_003249875.2	552173	-	3273	18.3623	13.332	0.461855	0.0071	0.0499217
XM_003249876.2	100576702	-	3661	0.139215	0.58185	-2.06333	5e-05	0.000627385
XM_003249877.2	410063	-	3569	1.60232	5.23203	-1.70721	5e-05	0.000627385
XM_003249891.2	726941	-	5565	13.1388	23.7702	-0.855323	5e-05	0.000627385
XM_003249898.2	100578699	-	5891	23.468	3.75449	2.644	5e-05	0.000627385
XM_003249902.2	100579047	-	870	18.1921	0.350294	5.6986	5e-05	0.000627385
XM_003249904.2	100576161	-	828	3.36253	16.3972	-2.28582	5e-05	0.000627385
XM_003249912.2	100577252	-	1561	4.45088	8.60839	-0.951653	0.00065	0.00638377
XM_003249940.2	100578513	-	1953	15.5361	27.7012	-0.834323	5e-05	0.000627385
XM_003249946.2	411619	-	3635	124.4	43.9046	1.50254	5e-05	0.000627385
XM_003249965.2	100578810	-	5957	0.592938	6.10288	-3.36354	5e-05	0.000627385
XM_003249968.2	411068	-	4675	40.5322	22.1845	0.86952	5e-05	0.000627385
XM_003249977.2	100577231	-	5197	1.40182	5.89662	-2.07258	5e-05	0.000627385
XM_003249978.2	100577410	-	1585	0.258678	0.919972	-1.83043	0.00035	0.00368417
XM_003249995.2	100576903	-	1539	5.4339	11.3952	-1.06836	5e-05	0.000627385
XM_003249997.2	100576956	-	3041	9.56265	77.3052	-3.01508	5e-05	0.000627385
XM_003250013.2	100578829	-	1425	53.6365	6.8864	2.96139	5e-05	0.000627385
XM_003250016.2	100576373	-	2119	4.35698	8.28132	-0.926533	0.0054	0.0396288
XM_003250028.2	552134	-	595	27.4973	46.6805	-0.763531	0.0003	0.00321156
XM_003250031.2	100578754	-	4460	101.818	32.5606	1.64479	5e-05	0.000627385
XM_003250037.2	100576444	-	413	0	21.7998	#NAME?	5e-05	0.000627385
XM_003250044.2	100577491	-	939	28.1743	40.7366	-0.531944	0.00245	0.0202465
XM_003250045.2	100577698	-	1550	275.265	0.0678088	11.9871	0.0028	0.0226888
XM_003250050.2	100578105	-	2427	2.74902	4.88908	-0.830643	0.00045	0.00460371
XM_003250054.2	100578433	-	6243	47.576	24.0988	0.981275	5e-05	0.000627385
XM_003250060.2	100576162	-	3215	88.1047	34.4205	1.35595	5e-05	0.000627385
XM_003250066.2	100576568	-	3795	94.191	2.12892	5.46739	0.0007	0.006805
XM_003250068.2	725816	-	1675	6.94942	11.6511	-0.745504	0.00045	0.00460371
XM_003250077.2	100578995	-	1915	0.0991282	2.96421	-4.90221	0.0017	0.0147499
XM_003250080.2	100576492	-	962	61.8739	26.1182	1.24428	5e-05	0.000627385
XM_003250084.2	100576912	-	2230	63.6115	9.82602	2.69461	5e-05	0.000627385
XM_003250085.2	100576982	-	1978	226.702	0.0492628	12.168	0.00285	0.0230215
XM_003250087.2	100577135	-	2109	0.0865805	0.550971	-2.66986	0.00075	0.00723644
XM_003250093.2	100577725	-	542	0.547827	55.6087	-6.66545	5e-05	0.000627385
XM_003250097.2	100578248	-	4953	3.16436	0.480856	2.71823	5e-05	0.000627385
XM_003250115.2	409049	-	6282	47.7843	15.5591	1.61878	5e-05	0.000627385
XM_003250143.2	100576236	-	1400	10.3217	0.142322	6.18038	5e-05	0.000627385
XM_003250146.2	100576983	-	962	1.5768	9.41592	-2.5781	5e-05	0.000627385
XM_003250168.2	100576814	-	2219	13.2092	87.215	-2.72303	5e-05	0.000627385
XM_003250171.2	100577099	-	1908	0.0776665	0.551885	-2.829	0.0017	0.0147499
XM_003250175.2	100578277	-	817	5.96704	13.7066	-1.19978	0.00095	0.00890592
XM_003250183.2	411406	-	1613	14.2408	4.74452	1.58569	5e-05	0.000627385
XM_003250185.2	100577585	-	1532	0.355871	1.42214	-1.99864	5e-05	0.000627385
XM_003250197.2	100576126	-	1677	0.221277	0.990885	-2.16286	0.0001	0.00119145
XM_003250200.2	100576835	-	2796	30.878	15.3241	1.01078	5e-05	0.000627385
XM_003250211.2	100576273	-	2572	89.3846	32.0866	1.47805	5e-05	0.000627385
XM_003250215.2	100576529	-	4049	21.9557	0.412202	5.7351	0.00615	0.0442345
XM_003250216.2	100576569	-	6951	75.5262	0.400609	7.55864	5e-05	0.000627385
XM_003250218.2	100576791	-	2211	1709.89	239.734	2.8344	5e-05	0.000627385
XM_003250221.2	100576891	-	740	41.5868	4.13524	3.33008	5e-05	0.000627385
XM_003250236.2	100578924	-	2399	15.6609	7.91002	0.985417	5e-05	0.000627385
XM_003250238.2	100576432	-	3047	14.4761	8.46478	0.774128	5e-05	0.000627385
XM_003250241.2	726510	-	3047	15.7522	2.93189	2.42565	5e-05	0.000627385
XM_003250245.2	100577320	-	1522	9.62409	20.7232	-1.10653	5e-05	0.000627385
XM_003250247.2	100577551	-	1805	0.697545	3.02402	-2.11611	5e-05	0.000627385
XM_003250250.2	100577841	-	861	6.08168	3.44344	0.82062	0.0056	0.0408847
XM_003250253.2	100578044	-	1786	54.3279	78.6438	-0.533641	0.00045	0.00460371
XM_003250257.2	410580	-	3525	124.191	80.0321	0.633907	0.0002	0.00222634
XM_003250285.2	100576224	-	1324	8.97336	2.93797	1.61083	5e-05	0.000627385
XM_003250290.2	100577382	-	2508	112.513	46.0908	1.28754	5e-05	0.000627385
XM_003250292.2	409990	-	3225	103.267	59.1708	0.803428	5e-05	0.000627385
XM_003250298.2	725312	-	1409	328.716	228.004	0.527784	0.0002	0.00222634
XM_003250306.2	100577269	-	1333	30.9398	12.1909	1.34366	0.0002	0.00222634
XM_003250317.2	100578888	-	8572	24.4701	13.1957	0.890955	5e-05	0.000627385
XM_003250336.2	100578116	-	4023	81.6646	50.4307	0.695406	5e-05	0.000627385
XM_003250339.2	551815	-	1500	34.1721	24.2155	0.496891	0.0028	0.0226888
XM_003250340.2	724896	-	639	8.23204	20.4439	-1.31235	5e-05	0.000627385
XM_003250351.2	100576843	-	2308	3.63133	6.29185	-0.792985	0.0002	0.00222634
XM_003250367.2	724928	-	1853	86.8721	32.555	1.41601	5e-05	0.000627385
XM_003250369.2	100576116	-	3382	15.8277	24.6888	-0.641406	5e-05	0.000627385
XM_003250380.2	100577396	-	1079	13.873	5.29901	1.38848	5e-05	0.000627385
XM_003250384.2	552536	-	2418	127.901	80.4202	0.6694	5e-05	0.000627385
XM_003250385.2	100578046	-	2167	22.4753	102.321	-2.1867	5e-05	0.000627385
XM_003250397.2	100576274	-	1368	3.67063	11.4458	-1.64072	5e-05	0.000627385
XM_003250417.2	100577014	-	4342	63.883	31.7513	1.00862	5e-05	0.000627385
XM_003250418.2	100577014	-	4591	42.1889	11.2794	1.90317	5e-05	0.000627385
XM_003250422.2	550885	-	2937	10.1688	3.67113	1.46986	0.0019	0.0162503
XM_003250424.2	100578011	-	2654	26.9447	14.3876	0.905174	5e-05	0.000627385
XM_003250430.2	100579031	-	1063	1.84644	11.1265	-2.59118	5e-05	0.000627385
XM_003250442.2	100578200	-	1104	16.6211	6.36513	1.38475	0.0054	0.0396288
XM_003250455.2	100577210	-	242	78.8722	192.807	-1.28957	5e-05	0.000627385
XM_003250459.2	100577546	-	1965	4.25469	8.47337	-0.993884	5e-05	0.000627385
XM_003250465.2	100578715	-	2763	10.5711	6.26528	0.754672	0.0037	0.0287608
XM_003250479.2	100577480	-	2145	52.549	1223.2	-4.54086	5e-05	0.000627385
XM_003250481.2	552381	-	2232	53.0308	27.9089	0.926103	5e-05	0.000627385
XM_003250482.2	100577967	-	1731	3.03208	6.02107	-0.989714	0.0001	0.00119145
XM_003250483.2	410165	-	6139	18.2106	27.0617	-0.571471	0.00365	0.0284205
XM_003250500.2	100578813	-	6859	23.8232	10.4104	1.19434	5e-05	0.000627385
XM_003250501.2	100578877	-	4423	0.404283	1.11094	-1.45835	5e-05	0.000627385
XM_003250512.2	725575	-	2939	37.7759	25.7388	0.553524	0.0003	0.00321156
XM_003250519.2	410744	-	3197	15.5493	3.75924	2.04834	5e-05	0.000627385
XM_003250533.2	100577510	-	2216	45.0832	8.05855	2.484	5e-05	0.000627385
XM_003250542.2	100578201	-	5030	49.1828	26.6889	0.881915	5e-05	0.000627385
XM_003250545.2	100578526	-	1457	17.3044	11.8775	0.542905	0.004	0.0307319
XM_003250548.2	100578927	-	2355	51.2893	31.5621	0.700468	0.00035	0.00368417
XM_003250549.2	100578927	-	2397	46.1047	26.1439	0.81844	0.00015	0.00171726
XM_003250552.2	552286	-	7471	42.7296	9.61576	2.15176	5e-05	0.000627385
XM_003250553.2	100576619	-	1421	28.1415	20.394	0.464551	0.0062	0.0445376
XM_003250555.2	410370	-	1040	21.012	3.203	2.71372	0.00385	0.0297521
XM_003250565.2	100576227	-	3941	40.3302	20.4967	0.976469	5e-05	0.000627385
XM_003250566.2	100576266	-	4268	44.0161	25.1605	0.806872	5e-05	0.000627385
XM_003250575.2	100577669	-	4335	4.33962	20.5586	-2.2441	0.00055	0.00549577
XM_003250585.2	408891	-	1045	33.7596	11.9972	1.4926	5e-05	0.000627385
XM_003250586.2	408891	-	1012	12.0085	3.41028	1.8161	0.00025	0.00272364
XM_003250599.2	100577083	-	926	42.4163	16.4777	1.36411	5e-05	0.000627385
XM_003250612.2	100578816	-	3072	5.38211	25.95	-2.26949	5e-05	0.000627385
XM_003250614.2	100576293	-	3715	0.212685	3.11402	-3.87199	5e-05	0.000627385
XM_003250616.2	100576741	-	655	0.186849	1.53587	-3.03911	0.00575	0.0418311
XM_003250620.2	100577235	-	3437	210.31	17.9825	3.54785	5e-05	0.000627385
XM_003250627.2	100577844	-	1328	5.71859	51.7081	-3.17666	5e-05	0.000627385
XM_003250629.2	412916	-	2548	8.48994	19.9053	-1.22933	5e-05	0.000627385
XM_003250634.2	411091	-	2378	72.8903	39.9452	0.867705	5e-05	0.000627385
XM_003250636.2	411095	-	2885	42.9084	20.8376	1.04207	5e-05	0.000627385
XM_003250647.2	100577387	-	1391	1.70858	3.60683	-1.07793	0.00025	0.00272364
XM_003250648.2	410552	-	8400	0.39548	1.79994	-2.18627	0.0002	0.00222634
XM_003250649.2	100577632	-	2574	0.112696	0.775685	-2.78303	5e-05	0.000627385
XM_003250652.2	410545	-	9274	28.9546	11.0326	1.39203	5e-05	0.000627385
XM_003250660.2	100576152	-	1468	0.689052	2.43618	-1.82193	5e-05	0.000627385
XM_003250709.2	100577226	-	1696	0.390083	1.47227	-1.91619	0.0003	0.00321156
XM_003250732.2	552365	-	3558	59.0988	19.5255	1.59777	5e-05	0.000627385
XM_003250734.2	550664	-	1592	39.5266	22	0.845316	0.00125	0.0113133
XM_003250748.2	100578048	-	2788	39.6988	16.5724	1.26032	5e-05	0.000627385
XM_003250752.2	100578769	-	3057	10.2307	6.64888	0.621719	0.00035	0.00368417
XM_003250754.2	100578854	-	5132	0.715942	6.73021	-3.23274	5e-05	0.000627385
XM_003250762.2	100576963	-	2179	29.9406	11.3223	1.40293	5e-05	0.000627385
XM_003250766.2	726268	-	1444	18.2355	162.109	-3.15214	5e-05	0.000627385
XM_003250773.2	100578316	-	988	135.725	4.84839	4.80704	5e-05	0.000627385
XM_003250774.2	100578448	-	992	0.942802	2.2136	-1.23137	0.0023	0.01916
XM_003250783.2	100576945	-	630	16.1544	47.8379	-1.56623	5e-05	0.000627385
XM_003250795.2	552577	-	5397	0.279359	1.8097	-2.69555	5e-05	0.000627385
XM_003250818.2	410258	-	2568	277.282	150.06	0.885816	5e-05	0.000627385
XM_003250821.2	100577879	-	4776	58.7712	118.904	-1.01661	5e-05	0.000627385
XM_003250827.2	411458	-	2397	56.62	31.4573	0.847916	5e-05	0.000627385
XM_003250828.2	100579040	-	2908	10.2682	19.3753	-0.916045	0.0001	0.00119145
XM_003250839.2	551467	-	2009	16.2291	28.6393	-0.819412	5e-05	0.000627385
XM_003250841.2	100578745	-	1877	1.49935	5.81576	-1.95563	5e-05	0.000627385
XM_003250851.2	409941	-	2991	29.4159	20.8039	0.499741	0.0007	0.006805
XM_003250856.2	100577456	-	9033	1.06979	4.62667	-2.11265	5e-05	0.000627385
XM_003250857.2	100577644	-	973	13.1183	20.4268	-0.638884	0.0017	0.0147499
XM_003250858.2	100577801	-	4353	18.1199	6.78959	1.41618	5e-05	0.000627385
XM_003250880.2	100576717	-	5657	31.6186	54.2488	-0.778817	5e-05	0.000627385
XM_003250883.2	100576985	-	2546	0.631113	1.82458	-1.5316	0.00325	0.0257619
XM_003250886.2	724651	-	6020	1.6476	3.62336	-1.13696	5e-05	0.000627385
XM_003250888.2	100577574	-	2217	1.03679	4.44943	-2.10149	5e-05	0.000627385
XM_003250893.2	100578025	-	1017	2789.23	17.0021	7.35801	5e-05	0.000627385
XM_003250895.2	100578107	-	1581	373.995	0.773797	8.91685	5e-05	0.000627385
XM_003250903.2	413224	-	5328	9.85514	5.58295	0.819847	5e-05	0.000627385
XM_003250916.2	100578121	-	1786	1.46652	42.0115	-4.84032	5e-05	0.000627385
XM_003250942.2	408791	-	5076	18.565	7.53854	1.30023	5e-05	0.000627385
XM_003250944.2	100576412	-	1897	15.3951	6.66337	1.20815	5e-05	0.000627385
XM_003250964.2	100578999	-	1281	40.6992	11.8236	1.78333	5e-05	0.000627385
XM_003251006.2	727000	-	6366	83.6509	28.787	1.53896	5e-05	0.000627385
XM_003251017.2	100578770	-	3479	0.764819	2.46252	-1.68694	5e-05	0.000627385
XM_003251023.2	100576610	-	1612	8.20891	23.9905	-1.5472	5e-05	0.000627385
XM_003251024.2	408981	-	2516	0.80116	6.80456	-3.08634	5e-05	0.000627385
XM_003251041.2	551934	-	1903	5.80312	2.04881	1.50204	0.00025	0.00272364
XM_003251043.2	725363	-	1228	79.9041	26.8221	1.57485	5e-05	0.000627385
XM_003251049.2	100577158	-	1906	3.61659	8.58399	-1.24702	5e-05	0.000627385
XM_003251050.2	100577295	-	3806	24.7898	18.5836	0.415716	0.00355	0.0277701
XM_003251053.2	100577376	-	4151	1.13031	4.28935	-1.92404	5e-05	0.000627385
XM_003251058.2	100577717	-	2206	6.40153	0.482423	3.73004	5e-05	0.000627385
XM_003251062.2	100578085	-	1118	14.4551	3.79737	1.9285	5e-05	0.000627385
XM_003251063.2	100578123	-	1219	12.9892	1.62456	2.9992	5e-05	0.000627385
XM_003251068.2	100578476	-	5754	0.153247	0.449423	-1.55221	5e-05	0.000627385
XM_003251077.2	100576794	-	1088	39.2446	28.2523	0.474129	0.0049	0.0365022
XM_003251078.2	100576826	-	2042	4.25159	10.6884	-1.32998	0.00015	0.00171726
XM_003251081.2	100577237	-	3466	7.48698	1.43238	2.38597	5e-05	0.000627385
XM_003251083.2	725733	-	1011	46.8989	24.7692	0.921004	5e-05	0.000627385
XM_003251087.2	100577803	-	2028	0.989466	1.85964	-0.910304	0.0032	0.0254182
XM_003251098.2	100576817	-	3887	89.1435	34.918	1.35216	5e-05	0.000627385
XM_003251102.2	551125	-	548	623.57	865.636	-0.473209	0.0005	0.00505175
XM_003251113.2	551457	-	1020	2.04374	5.45975	-1.41762	5e-05	0.000627385
XM_003251121.2	409715	-	3803	0.1841	1.08849	-2.56376	5e-05	0.000627385
XM_003251128.2	100577859	-	1029	0.1763	1.27254	-2.8516	0.0014	0.0124897
XM_003251136.2	100579020	-	3457	350.71	34.0689	3.36375	5e-05	0.000627385
XM_003251145.2	100577530	-	4682	1.26552	9.02888	-2.83482	5e-05	0.000627385
XM_003251147.2	410867	-	9100	14.1348	19.5324	-0.46662	0.00165	0.0143795
XM_003251153.2	100578478	-	1142	1.97419	0.607864	1.69944	0.00495	0.0368224
XM_003251155.2	100578691	-	2858	74.7358	20.7197	1.8508	5e-05	0.000627385
XM_003251160.2	724220	-	6426	0.115301	2.00402	-4.11942	5e-05	0.000627385
XM_003251162.2	100576795	-	3161	53.734	20.5629	1.38579	5e-05	0.000627385
XM_003251166.2	100578232	-	790	14.5277	46.2617	-1.67101	5e-05	0.000627385
XM_003251169.2	411541	-	2344	8.04064	18.7569	-1.22204	5e-05	0.000627385
XM_003251170.2	100578834	-	1084	10.0634	17.7818	-0.821277	0.00015	0.00171726
XM_003251173.2	724757	-	498	257.738	160.713	0.681417	5e-05	0.000627385
XM_003251176.2	552505	-	7439	118.109	14.4111	3.03487	5e-05	0.000627385
XM_003251213.2	100579041	-	603	165.064	53.6964	1.62013	5e-05	0.000627385
XM_003251219.2	552620	-	2729	26.3294	11.3348	1.21592	5e-05	0.000627385
XM_003251228.2	100576796	-	1084	0.265095	1.46534	-2.46666	0.0004	0.00415277
XM_003251248.2	410824	-	3321	2.75028	18.5743	-2.75565	5e-05	0.000627385
XM_003251273.2	100578404	-	5880	58.4509	41.834	0.482547	0.00035	0.00368417
XM_003251277.2	100578780	-	5332	232.882	11.0737	4.39439	5e-05	0.000627385
XM_003251296.2	100577576	-	1706	2.29938	18.0771	-2.97485	5e-05	0.000627385
XM_003251302.2	100578706	-	5592	30.2798	10.023	1.59504	5e-05	0.000627385
XM_003251305.2	100576333	-	1973	32.77	14.5132	1.17501	5e-05	0.000627385
XM_003251337.2	725915	-	1438	20.2372	32.3501	-0.676756	0.00115	0.0105259
XM_003251353.2	100576600	-	2719	46.0923	26.8709	0.778485	5e-05	0.000627385
XM_003251354.2	100576848	-	2360	22.7925	15.2732	0.57756	0.00095	0.00890592
XM_003251358.2	724633	-	592	526.026	108.01	2.28397	5e-05	0.000627385
XM_003251365.2	100579052	-	1467	0.406183	3.32849	-3.03467	5e-05	0.000627385
XM_003251375.2	100578466	-	2252	1.32242	3.01191	-1.1875	5e-05	0.000627385
XM_003251376.2	100578533	-	1047	41.9244	12.8819	1.70245	5e-05	0.000627385
XM_003251379.2	100576760	-	1550	22.5913	8.67517	1.38081	5e-05	0.000627385
XM_003251399.2	100577324	-	1388	11.0949	18.3088	-0.722633	0.00015	0.00171726
XM_003251401.2	410026	-	1470	99.5323	76.1461	0.386395	0.005	0.037132
XM_003251402.2	408863	-	2122	51.5969	2.87196	4.16717	5e-05	0.000627385
XM_003251410.2	100579034	-	2604	23.6705	6.74816	1.81053	5e-05	0.000627385
XM_003251414.2	100576522	-	1087	6.6108	3.52881	0.905642	0.00325	0.0257619
XM_003251416.2	551176	-	2114	4.299	16.7947	-1.96593	5e-05	0.000627385
XM_003251427.2	100577846	-	2721	17.8671	27.2197	-0.607342	0.00415	0.0316952
XM_003251446.2	100577499	-	1433	42.0429	19.3252	1.12137	5e-05	0.000627385
XM_003251456.2	551679	-	1531	1.51131	6.06723	-2.00524	0.00055	0.00549577
XM_003251457.2	100578966	-	1614	0.841008	2.42303	-1.52662	5e-05	0.000627385
XM_003251462.2	413870	-	4651	32.4167	10.952	1.56554	5e-05	0.000627385
XM_003251463.2	100576908	-	3898	149.514	32.314	2.21005	5e-05	0.000627385
XM_003251487.2	100577623	-	2647	15.1401	54.6453	-1.85172	5e-05	0.000627385
XM_003251496.2	100576279	-	2111	0.709917	1.92461	-1.43884	5e-05	0.000627385
XM_003251510.2	100578709	-	2769	7.22995	0.754697	3.26002	0.00285	0.0230215
XM_003251512.2	552752	-	3927	61.0732	34.3292	0.831101	5e-05	0.000627385
XM_003251514.2	100578939	-	4441	148.455	44.7138	1.73123	5e-05	0.000627385
XM_003251519.2	100576179	-	6242	3.73182	2.46045	0.600958	0.00265	0.0216517
XM_003251528.2	408875	-	2104	19.8047	80.3558	-2.02056	5e-05	0.000627385
XM_003251533.2	551659	-	2891	61.5859	18.396	1.74321	5e-05	0.000627385
XM_003251536.2	100577636	-	5650	4.00595	7.14823	-0.83544	0.00015	0.00171726
XM_003251545.2	100578782	-	635	41.6821	65.0124	-0.641287	0.0009	0.00850416
XM_003251565.2	726468	-	590	6115.77	823.119	2.89336	5e-05	0.000627385
XM_003251571.2	726542	-	569	11960.1	1483.55	3.01111	5e-05	0.000627385
XM_003251575.2	413674	-	1234	50.2659	73.3525	-0.545266	0.0004	0.00415277
XM_003251576.2	725230	-	595	4941.1	1982.95	1.31718	5e-05	0.000627385
XM_003251578.2	725344	-	741	553.721	1052.37	-0.926416	5e-05	0.000627385
XM_003251582.2	100577239	-	4188	2.01031	10.2351	-2.34803	5e-05	0.000627385
XM_003251603.2	100577346	-	1843	3.62178	17.0152	-2.23205	5e-05	0.000627385
XM_003251604.2	413046	-	3810	60.5168	36.6	0.725493	5e-05	0.000627385
XM_003251623.2	724832	-	3309	96.1947	137.639	-0.516864	0.00015	0.00171726
XM_003251626.2	100578059	-	4008	26.1954	6.29728	2.05651	5e-05	0.000627385
XM_003251630.2	100578257	-	1435	16.8447	9.59	0.812696	5e-05	0.000627385
XM_003251631.2	100578289	-	1578	170.567	45.2642	1.9139	5e-05	0.000627385
XM_003251652.2	100576169	-	5631	51.3318	192.842	-1.9095	5e-05	0.000627385
XM_003251660.2	726061	-	665	17.9137	33.6272	-0.908565	0.00445	0.03364
XM_003251665.2	100578060	-	1787	20.7179	0.866614	4.57934	5e-05	0.000627385
XM_003251674.2	100576938	-	1967	4.52137	8.79006	-0.959113	0.0012	0.01092
XM_003251677.2	100577501	-	6151	90.1447	45.0525	1.00064	5e-05	0.000627385
XM_003251693.2	100576258	-	1262	30.9782	18.5466	0.740098	0.0001	0.00119145
XM_003251702.2	411753	-	3358	50.3555	18.2201	1.46662	5e-05	0.000627385
XM_003251706.2	100578883	-	6044	32.8389	11.1888	1.55335	5e-05	0.000627385
XM_003251708.2	100579054	-	806	5.16138	13.2438	-1.35949	5e-05	0.000627385
XM_003251717.2	100577108	-	1613	1.48813	8.9266	-2.58461	5e-05	0.000627385
XM_003251724.2	100578606	-	2568	58.5384	8.65746	2.75737	5e-05	0.000627385
XM_003251731.2	725725	-	809	0.240767	3.45684	-3.84375	0.0002	0.00222634
XM_003251734.2	408607	-	5253	29.1257	10.3042	1.49906	5e-05	0.000627385
XM_003251746.2	100577920	-	3630	18.5518	8.04817	1.20483	5e-05	0.000627385
XM_003251751.2	552089	-	1787	2.55777	4.69128	-0.875092	0.00205	0.0173499
XM_003251763.2	100577766	-	3330	27.5806	38.243	-0.471542	0.001	0.00932037
XM_003251764.2	100577806	-	1364	0.695498	2.07954	-1.58015	5e-05	0.000627385
XM_003251765.2	100578030	-	1156	273.831	95.7773	1.51553	5e-05	0.000627385
XM_003251766.2	100578061	-	693	1.26313	3.09475	-1.29282	0.0019	0.0162503
XM_003251769.2	100578468	-	802	839.546	52.9045	3.98815	5e-05	0.000627385
XM_003251771.2	100578519	-	4108	15.1603	27.8637	-0.878089	5e-05	0.000627385
XM_003251772.2	100578694	-	842	63.2579	40.2399	0.652618	0.0002	0.00222634
XM_003251780.2	412268	-	1480	101.694	56.2193	0.855095	5e-05	0.000627385
XM_003251785.2	100577579	-	836	7.82215	15.2693	-0.964994	0.0001	0.00119145
XM_003251788.2	412853	-	6226	29.2089	11.4107	1.35602	5e-05	0.000627385
XM_003251789.2	100578332	-	1554	9.26328	19.0626	-1.04115	5e-05	0.000627385
XM_003251797.2	100576498	-	1683	1.86015	18.936	-3.34764	5e-05	0.000627385
XM_003251802.2	725031	-	2112	134.727	79.9117	0.753563	5e-05	0.000627385
XM_003251806.2	100577566	-	560	116.199	60.0466	0.952444	5e-05	0.000627385
XM_003251807.2	100577649	-	2250	71.5248	43.7032	0.710704	5e-05	0.000627385
XM_003251812.2	727456	-	3589	241.389	12.2974	4.29493	5e-05	0.000627385
XM_003251833.2	100576187	-	1483	70.4345	42.6807	0.722698	5e-05	0.000627385
XM_003251835.2	726936	-	1391	47.3732	12.6779	1.90176	5e-05	0.000627385
XM_003251837.2	100576829	-	3263	29.6157	15.0406	0.977499	5e-05	0.000627385
XM_003251838.2	100576862	-	2170	9.82411	23.9887	-1.28795	5e-05	0.000627385
XM_003251849.2	100578553	-	775	33.9726	2.19372	3.95292	5e-05	0.000627385
XM_003251852.2	100578723	-	997	6.95365	17.0035	-1.28999	5e-05	0.000627385
XM_003251853.2	100579062	-	869	214.912	74.0737	1.53671	5e-05	0.000627385
XM_003251854.2	100576270	-	653	1.45302	6.23099	-2.1004	5e-05	0.000627385
XM_003251859.2	100576919	-	4608	32.0614	12.0984	1.40602	5e-05	0.000627385
XM_003251872.2	100576155	-	1234	40.7206	63.5626	-0.642417	5e-05	0.000627385
XM_003251873.2	411585	-	1848	48.0108	11.8054	2.02391	5e-05	0.000627385
XM_003251896.2	100577795	-	3352	24.7188	9.74619	1.3427	5e-05	0.000627385
XM_003251906.2	100576536	-	917	0.79519	2.37095	-1.57609	0.00015	0.00171726
XM_003251908.2	100576811	-	669	2.73504	1.03025	1.40857	0.00205	0.0173499
XM_003251911.2	100577095	-	931	40.5344	15.934	1.34704	5e-05	0.000627385
XM_003251948.1	100577187	-	921	5.76743	0	inf	5e-05	0.000627385
XM_003251966.2	100578648	-	1995	16.7593	8.78862	0.931252	5e-05	0.000627385
XM_003251968.2	100578765	-	1097	0.47824	3.40815	-2.83318	5e-05	0.000627385
XM_003251972.2	727625	-	644	34.9145	49.9176	-0.515721	0.00665	0.0472359
XM_003251977.1	100576612	-	287	170.899	291.882	-0.772241	5e-05	0.000627385
XM_003251978.2	100576849	-	876	1.13038	4.24119	-1.90766	5e-05	0.000627385
XM_003251985.2	100577523	-	1310	0.318706	0.798447	-1.32497	0.00625	0.0448285
XM_003251994.2	100578838	-	432	0	1.50449	#NAME?	5e-05	0.000627385
XM_003252002.2	100576978	-	1065	1.17751	4.34642	-1.88409	5e-05	0.000627385
XM_003252026.2	100576427	-	539	71.6544	27.5057	1.38132	5e-05	0.000627385
XM_003252030.2	100577023	-	618	75.9549	4.05537	4.22724	5e-05	0.000627385
XM_006557216.1	552467	-	2857	105.327	71.251	0.563891	5e-05	0.000627385
XM_006557218.1	412647	-	2162	0.303709	1.02315	-1.75225	5e-05	0.000627385
XM_006557223.1	551956	-	1140	109.025	81.703	0.416202	0.00435	0.0329738
XM_006557224.1	411919	-	2750	0.107256	0.440178	-2.03703	0.0004	0.00415277
XM_006557226.1	550886	-	2984	102.454	65.4603	0.646289	5e-05	0.000627385
XM_006557245.1	409286	-	4274	11.8978	6.22919	0.933583	0.00475	0.0355475
XM_006557256.1	411365	-	3129	5.3095	2.53639	1.0658	0.0069	0.0487161
XM_006557258.1	552297	-	1590	23.3719	5.89034	1.98835	5e-05	0.000627385
XM_006557270.1	411905	-	4489	20.9819	12.4451	0.753571	0.0009	0.00850416
XM_006557271.1	102654281	-	6846	0.41448	1.8487	-2.15713	0.0051	0.0377539
XM_006557273.1	102654281	-	5880	0.185352	6.23802	-5.07275	0.0008	0.00765733
XM_006557278.1	413616	-	4103	14.5358	23.0578	-0.665646	0.0005	0.00505175
XM_006557283.1	412547	-	554	28.4525	9.70542	1.55169	0.0002	0.00222634
XM_006557284.1	100578522	-	1041	111.911	52.0507	1.10436	5e-05	0.000627385
XM_006557290.1	411525	-	2676	3.55577	11.6222	-1.70865	0.0035	0.0274366
XM_006557294.1	552086	-	1381	5.95377	20.8069	-1.80519	0.00375	0.0290952
XM_006557297.1	102655415	-	1854	2.41261	0.0790035	4.93254	0.0001	0.00119145
XM_006557299.1	412637	-	2332	77.4712	21.7043	1.83568	5e-05	0.000627385
XM_006557312.1	413721	-	4390	36.818	12.0434	1.61217	5e-05	0.000627385
XM_006557320.1	100576146	-	906	26.112	16.8964	0.627998	0.00165	0.0143795
XM_006557322.1	411814	-	3316	8.9255	4.04351	1.14232	5e-05	0.000627385
XM_006557331.1	411557	-	4172	60.9052	11.7809	2.37012	5e-05	0.000627385
XM_006557332.1	409324	-	1230	48.9267	29.0626	0.751457	5e-05	0.000627385
XM_006557333.1	552548	-	11617	14.5753	24.0467	-0.722317	5e-05	0.000627385
XM_006557341.1	100576993	-	4243	13.746	50.2477	-1.87004	5e-05	0.000627385
XM_006557345.1	551403	-	1699	149.759	96.7504	0.630306	5e-05	0.000627385
XM_006557346.1	726305	-	2731	19.6055	9.2408	1.08517	5e-05	0.000627385
XM_006557347.1	726305	-	2731	18.0046	10.015	0.846207	0.00115	0.0105259
XM_006557350.1	408626	-	2831	33.2929	15.682	1.08611	5e-05	0.000627385
XM_006557351.1	408626	-	1923	41.258	22.5464	0.871773	0.0004	0.00415277
XM_006557352.1	551678	-	1292	20.3167	10.0044	1.02204	0.00635	0.0454629
XM_006557353.1	102656058	-	6148	83.3272	27.3063	1.60955	5e-05	0.000627385
XM_006557359.1	726609	-	374	108.46	62.0634	0.805345	0.0002	0.00222634
XM_006557368.1	551203	-	11845	16.4599	9.08303	0.857709	0.00375	0.0290952
XM_006557375.1	100578571	-	2494	427.515	1.33642	8.32146	5e-05	0.000627385
XM_006557380.1	726544	-	3431	57.2177	30.9034	0.888694	0.0016	0.0140101
XM_006557387.1	410663	-	541	15.98	31.249	-0.967544	0.00295	0.0237238
XM_006557397.1	726145	-	1195	145.716	52.9981	1.45914	5e-05	0.000627385
XM_006557404.1	551555	-	4187	66.2506	36.1758	0.872906	0.00015	0.00171726
XM_006557405.1	551555	-	4026	89.1037	47.632	0.903555	5e-05	0.000627385
XM_006557407.1	551646	-	1641	42.907	10.4357	2.03968	5e-05	0.000627385
XM_006557408.1	100577692	-	7286	50.1441	11.223	2.15963	5e-05	0.000627385
XM_006557409.1	102655546	-	2283	20.1523	10.3584	0.96014	5e-05	0.000627385
XM_006557420.1	410289	-	2674	37.997	53.195	-0.485408	0.00075	0.00723644
XM_006557421.1	410293	-	3273	0.564	2.31058	-2.03449	0.00605	0.0436104
XM_006557425.1	100577693	-	1222	0.621857	3.12381	-2.32865	5e-05	0.000627385
XM_006557436.1	413309	-	3228	53.3427	20.3604	1.38952	5e-05	0.000627385
XM_006557441.1	551838	-	2602	20.4186	11.3136	0.851825	5e-05	0.000627385
XM_006557444.1	413310	-	8427	2.70522	5.74822	-1.08737	0.002	0.0169774
XM_006557446.1	413310	-	8196	10.2638	16.0456	-0.64462	0.0001	0.00119145
XM_006557447.1	413311	-	1266	5.59542	15.0283	-1.42536	5e-05	0.000627385
XM_006557448.1	102654282	-	904	23.2816	69.5038	-1.5779	5e-05	0.000627385
XM_006557450.1	409280	-	2526	42.0688	22.8462	0.880794	5e-05	0.000627385
XM_006557460.1	550656	-	1528	93.789	52.4455	0.838601	5e-05	0.000627385
XM_006557461.1	724799	-	4583	14.2858	6.00589	1.25013	0.0005	0.00505175
XM_006557462.1	724799	-	4432	78.704	17.8507	2.14046	5e-05	0.000627385
XM_006557469.1	413934	-	2844	20.2961	7.57208	1.42244	5e-05	0.000627385
XM_006557473.1	410375	-	3635	42.0618	17.5656	1.25976	5e-05	0.000627385
XM_006557475.1	409474	-	6091	41.1186	60.3194	-0.552832	5e-05	0.000627385
XM_006557484.1	411184	-	2417	1.59568	23.69	-3.89203	5e-05	0.000627385
XM_006557491.1	552266	-	536	653.654	861.95	-0.399075	0.0039	0.0300614
XM_006557495.1	725799	-	3184	4.50072	1.17837	1.93336	0.00415	0.0316952
XM_006557496.1	725799	-	3150	59.3143	15.9368	1.89602	5e-05	0.000627385
XM_006557504.1	413071	-	10666	16.4157	6.02074	1.44706	5e-05	0.000627385
XM_006557516.1	411182	-	4840	50.4501	22.352	1.17445	5e-05	0.000627385
XM_006557523.1	409908	-	4672	15.92	25.528	-0.681238	0.00155	0.0136406
XM_006557536.1	724845	-	2747	43.434	3.33301	3.70393	5e-05	0.000627385
XM_006557554.1	552703	-	1699	36.5223	18.9499	0.94659	5e-05	0.000627385
XM_006557556.1	410174	-	4796	54.4102	39.0295	0.479312	0.0036	0.0280992
XM_006557560.1	552697	-	2617	1.40404	7.31822	-2.3819	0.00055	0.00549577
XM_006557561.1	552697	-	2813	6.78744	12.3238	-0.860502	0.00065	0.00638377
XM_006557572.1	411780	-	3145	60.3131	16.5033	1.86972	5e-05	0.000627385
XM_006557583.1	551005	-	4900	20.1079	0.701786	4.84059	0.0024	0.0198832
XM_006557584.1	551005	-	4928	7.18237	23.8845	-1.73354	0.00015	0.00171726
XM_006557593.1	409185	-	2043	44.3665	9.38907	2.24042	5e-05	0.000627385
XM_006557613.1	410353	-	3733	0.33703	3.0248	-3.16589	5e-05	0.000627385
XM_006557618.1	550695	-	1831	23.2077	45.1153	-0.959013	5e-05	0.000627385
XM_006557630.1	413699	-	4594	20.444	13.2517	0.625498	0.00475	0.0355475
XM_006557632.1	552491	-	3611	5.33599	10.5673	-0.985782	0.00035	0.00368417
XM_006557633.1	552491	-	3134	2.87212	11.365	-1.98441	5e-05	0.000627385
XM_006557638.1	409158	-	2401	67.0619	40.1322	0.740734	0.0006	0.00594174
XM_006557641.1	409158	-	2223	55.3585	28.5154	0.957063	0.00035	0.00368417
XM_006557648.1	412465	-	1101	0.213339	2.9451	-3.78709	0.0001	0.00119145
XM_006557666.1	412994	-	8128	1.12066	3.94788	-1.81673	5e-05	0.000627385
XM_006557672.1	100576260	-	798	0.753086	2.62497	-1.80142	0.00035	0.00368417
XM_006557673.1	102656070	-	9039	3.21459	6.54379	-1.02549	5e-05	0.000627385
XM_006557675.1	552005	-	2764	27.5091	83.4173	-1.60044	5e-05	0.000627385
XM_006557677.1	410052	-	2229	1.01436	3.56562	-1.81359	0.00165	0.0143795
XM_006557680.1	410052	-	1978	4.04926	7.27142	-0.844579	0.00305	0.0243978
XM_006557684.1	409854	-	1085	889.582	86.1917	3.36751	0.0001	0.00119145
XM_006557685.1	409854	-	1063	358.034	67.1326	2.41501	0.00525	0.0386843
XM_006557687.1	409854	-	2149	1041.84	452.714	1.20247	5e-05	0.000627385
XM_006557689.1	100577347	-	4114	206.102	99.1096	1.05626	5e-05	0.000627385
XM_006557697.1	551329	-	2331	45.2548	29.7397	0.605682	0.00015	0.00171726
XM_006557702.1	412031	-	1938	38.2686	5.23441	2.87006	5e-05	0.000627385
XM_006557705.1	412031	-	1783	189.1	8.21872	4.5241	5e-05	0.000627385
XM_006557727.1	409424	-	2168	234.837	20.8384	3.49434	5e-05	0.000627385
XM_006557728.1	409424	-	2218	41.3215	4.94726	3.06219	5e-05	0.000627385
XM_006557730.1	412455	-	4252	48.1376	35.1158	0.455046	0.00705	0.0496317
XM_006557732.1	409688	-	1659	43.2746	29.1209	0.571466	0.0006	0.00594174
XM_006557736.1	726888	-	3296	26.5988	16.5674	0.683016	5e-05	0.000627385
XM_006557737.1	100578662	-	986	17.3562	50.8094	-1.54965	5e-05	0.000627385
XM_006557739.1	552756	-	1391	37.324	75.3634	-1.01376	0.0005	0.00505175
XM_006557741.1	100577610	-	3207	4.88705	9.10109	-0.897075	5e-05	0.000627385
XM_006557750.1	726816	-	1552	85.4567	53.8543	0.666131	0.0035	0.0274366
XM_006557758.1	100576709	-	5964	176.893	11.8906	3.89498	5e-05	0.000627385
XM_006557768.1	551080	-	2467	11.5559	2.69246	2.10163	0.0002	0.00222634
XM_006557787.1	409952	-	8460	82.5765	21.1998	1.96168	5e-05	0.000627385
XM_006557788.1	413532	-	4104	64.5747	25.966	1.31435	5e-05	0.000627385
XM_006557789.1	413534	-	1822	6.1746	12.7444	-1.04545	5e-05	0.000627385
XM_006557791.1	100577769	-	5695	6.38673	1.33178	2.26173	5e-05	0.000627385
XM_006557804.1	551053	-	1811	30.4885	13.9392	1.12912	5e-05	0.000627385
XM_006557805.1	411805	-	3073	7.58392	3.30354	1.19893	5e-05	0.000627385
XM_006557812.1	410402	-	2677	0.152752	1.4944	-3.2903	0.00045	0.00460371
XM_006557814.1	410402	-	1417	0.481794	2.72813	-2.50142	5e-05	0.000627385
XM_006557835.1	551650	-	1382	23.8847	54.042	-1.17799	5e-05	0.000627385
XM_006557837.1	551796	-	5044	0.598997	3.4832	-2.53979	5e-05	0.000627385
XM_006557843.1	100578321	-	3329	0.491413	1.18679	-1.27205	0.0021	0.0177095
XM_006557846.1	551822	-	2584	32.5429	15.5369	1.06664	5e-05	0.000627385
XM_006557862.1	102653604	-	5786	1.94588	5.18689	-1.41444	0.00045	0.00460371
XM_006557867.1	413267	-	3500	163.256	34.6336	2.23689	5e-05	0.000627385
XM_006557873.1	100577515	-	2125	1.05095	2.59388	-1.30341	5e-05	0.000627385
XM_006557875.1	551392	-	1196	12.0701	27.4728	-1.18657	5e-05	0.000627385
XM_006557886.1	412119	-	2067	15.2745	24.4278	-0.677395	5e-05	0.000627385
XM_006557891.1	100578903	-	2982	4643.64	94.8605	5.61331	5e-05	0.000627385
XM_006557896.1	724385	-	5633	8.11106	4.33268	0.904632	0.00045	0.00460371
XM_006557897.1	724385	-	2905	23.083	9.8302	1.23154	5e-05	0.000627385
XM_006557904.1	100576449	-	6700	17.0788	11.9385	0.516586	0.00615	0.0442345
XM_006557913.1	409414	-	4275	101.719	71.7671	0.503191	0.0002	0.00222634
XM_006557918.1	409337	-	3904	96.0231	41.5714	1.20779	5e-05	0.000627385
XM_006557922.1	102654133	-	3751	9.30569	3.94736	1.23723	0.0035	0.0274366
XM_006557923.1	102654133	-	3715	63.3312	20.287	1.64236	5e-05	0.000627385
XM_006557925.1	411463	-	4023	31.0775	11.8243	1.39411	5e-05	0.000627385
XM_006557938.1	411467	-	2246	0.0523888	0.520727	-3.3132	0.00265	0.0216517
XM_006557939.1	411466	-	12325	48.025	18.3409	1.38872	5e-05	0.000627385
XM_006557944.1	408764	-	8551	6.80517	1.91276	1.83097	5e-05	0.000627385
XM_006557955.1	408764	-	8154	10.2452	1.74102	2.55694	5e-05	0.000627385
XM_006557958.1	408764	-	7928	7.98081	1.21654	2.71375	5e-05	0.000627385
XM_006557976.1	408763	-	4794	3.1742	8.80352	-1.47169	0.00085	0.00808185
XM_006557977.1	408763	-	2424	18.7977	4.1622	2.17514	0.0001	0.00119145
XM_006557980.1	413389	-	3522	36.7078	14.9177	1.29906	5e-05	0.000627385
XM_006557986.1	409888	-	8931	29.7774	17.0278	0.806328	0.00255	0.0209604
XM_006557989.1	409888	-	8829	55.8776	25.741	1.1182	5e-05	0.000627385
XM_006557993.1	409888	-	6923	16.1611	5.78833	1.48131	0.0035	0.0274366
XM_006558001.1	100577228	-	5591	61.713	25.028	1.30203	5e-05	0.000627385
XM_006558008.1	100577932	-	2618	1.6399	5.47378	-1.73893	0.0002	0.00222634
XM_006558011.1	102654620	-	1248	9.63555	0.17222	5.80604	5e-05	0.000627385
XM_006558034.1	100578197	-	4430	20.677	30.351	-0.553716	0.001	0.00932037
XM_006558039.1	413545	-	2517	270.203	61.1422	2.1438	5e-05	0.000627385
XM_006558040.1	413545	-	2514	21.7107	5.7265	1.92268	0.0003	0.00321156
XM_006558066.1	100578089	-	2411	22.6095	13.8716	0.704789	5e-05	0.000627385
XM_006558076.1	412259	-	1727	0.739342	4.63805	-2.6492	5e-05	0.000627385
XM_006558081.1	102656466	-	1729	13.9213	5.85611	1.24928	0.00575	0.0418311
XM_006558089.1	411186	-	2258	23.4072	4.4444	2.39689	0.00015	0.00171726
XM_006558090.1	411186	-	2348	39.1064	7.456	2.39093	5e-05	0.000627385
XM_006558094.1	411186	-	2204	15.9937	2.88265	2.47204	0.0004	0.00415277
XM_006558095.1	726842	-	3417	2.36227	9.35365	-1.98535	5e-05	0.000627385
XM_006558096.1	726842	-	3411	1.01493	4.07722	-2.00621	5e-05	0.000627385
XM_006558098.1	413152	-	4361	42.9409	17.9465	1.25865	5e-05	0.000627385
XM_006558099.1	551544	-	2210	2.45318	0.333706	2.878	5e-05	0.000627385
XM_006558100.1	102654105	-	546	14.0505	26.3959	-0.909685	0.0006	0.00594174
XM_006558101.1	409950	-	5134	7.05163	4.29332	0.715863	5e-05	0.000627385
XM_006558103.1	724202	-	2110	0.177917	0.471498	-1.40605	0.00555	0.040572
XM_006558107.1	413210	-	7358	2.98183	5.53654	-0.892785	0.0002	0.00222634
XM_006558120.1	411980	-	5295	5.69737	1.93181	1.56034	5e-05	0.000627385
XM_006558121.1	411980	-	5281	10.8836	3.59469	1.59822	5e-05	0.000627385
XM_006558122.1	411980	-	4955	11.5384	3.96895	1.53961	0.0001	0.00119145
XM_006558125.1	550869	-	1614	5.59978	9.06566	-0.695041	0.00175	0.015129
XM_006558156.1	413994	-	7819	5.5515	2.3227	1.25708	5e-05	0.000627385
XM_006558159.1	413994	-	7816	8.19402	2.88728	1.50486	5e-05	0.000627385
XM_006558164.1	413573	-	1557	15.1294	3.93328	1.94354	0.00015	0.00171726
XM_006558167.1	724177	-	1253	99.1531	10.6486	3.219	5e-05	0.000627385
XM_006558170.1	724177	-	1625	37.0693	12.1726	1.60659	5e-05	0.000627385
XM_006558174.1	552228	-	1705	37.5077	61.0139	-0.701949	5e-05	0.000627385
XM_006558175.1	409465	-	2912	206.903	30.35	2.76919	5e-05	0.000627385
XM_006558185.1	100578955	-	4866	0.630913	7.21036	-3.51456	5e-05	0.000627385
XM_006558191.1	100576381	-	1532	51.762	32.0187	0.692976	0.00015	0.00171726
XM_006558193.1	551513	-	4783	48.9633	20.281	1.27157	0.0002	0.00222634
XM_006558196.1	551432	-	5210	4.06058	12.6037	-1.63409	5e-05	0.000627385
XM_006558216.1	411238	-	12143	7.54288	1.29583	2.54124	5e-05	0.000627385
XM_006558226.1	409711	-	3694	21.4765	13.887	0.629019	5e-05	0.000627385
XM_006558242.1	409200	-	4310	73.2644	34.8755	1.0709	5e-05	0.000627385
XM_006558243.1	409200	-	4370	9.00911	2.63806	1.7719	0.0039	0.0300614
XM_006558262.1	411827	-	5089	20.5003	9.44139	1.11857	0.0005	0.00505175
XM_006558263.1	100578260	-	2396	18.9722	12.1877	0.63846	0.00015	0.00171726
XM_006558271.1	100578556	-	4799	59.0203	44.0451	0.422229	0.0028	0.0226888
XM_006558279.1	412430	-	1859	4.42603	9.70853	-1.13324	5e-05	0.000627385
XM_006558293.1	413200	-	3191	2.59877	22.3739	-3.10591	5e-05	0.000627385
XM_006558294.1	100577558	-	1049	72.3317	20.7364	1.80247	5e-05	0.000627385
XM_006558298.1	726435	-	3257	52.5179	33.5518	0.646419	0.0013	0.011703
XM_006558305.1	413064	-	2786	40.0945	23.6317	0.762681	0.00045	0.00460371
XM_006558311.1	551490	-	958	3.75126	12.2423	-1.70643	5e-05	0.000627385
XM_006558319.1	552108	-	5705	9.58326	13.8647	-0.532826	0.00015	0.00171726
XM_006558320.1	412351	-	1254	6.98018	2.53459	1.46151	0.00455	0.0342807
XM_006558321.1	409881	-	1122	16.5007	188.539	-3.51427	5e-05	0.000627385
XM_006558326.1	100576282	-	1345	0.100868	0.511956	-2.34356	0.00535	0.039323
XM_006558327.1	102653606	-	1775	0.143944	0.579084	-2.00826	0.0011	0.0101285
XM_006558330.1	100576458	-	1599	0.260299	5.41423	-4.37851	5e-05	0.000627385
XM_006558331.1	725246	-	7374	0.696358	3.07911	-2.14461	5e-05	0.000627385
XM_006558333.1	413369	-	3442	0.522193	2.42275	-2.21399	5e-05	0.000627385
XM_006558345.1	100578623	-	3131	14.6882	37.7411	-1.36147	5e-05	0.000627385
XM_006558346.1	724640	-	4350	40.9338	13.1853	1.63436	5e-05	0.000627385
XM_006558352.1	724787	-	4993	14.5994	3.51655	2.05368	5e-05	0.000627385
XM_006558359.1	552027	-	2362	38.9008	22.4083	0.795766	0.00395	0.0303824
XM_006558362.1	552027	-	2293	44.7261	9.01536	2.31066	5e-05	0.000627385
XM_006558371.1	408758	-	5518	5.14285	1.69997	1.59706	0.0035	0.0274366
XM_006558377.1	408758	-	5319	22.1464	9.83612	1.17091	5e-05	0.000627385
XM_006558392.1	410968	-	4107	47.7848	20.4181	1.22671	5e-05	0.000627385
XM_006558400.1	413812	-	4088	41.8211	22.4438	0.897912	5e-05	0.000627385
XM_006558423.1	100577638	-	3428	34.9679	5.70618	2.61543	5e-05	0.000627385
XM_006558424.1	100577638	-	3309	28.4038	5.86091	2.27689	5e-05	0.000627385
XM_006558430.1	408759	-	2884	55.0919	14.2926	1.94657	5e-05	0.000627385
XM_006558432.1	408759	-	4748	18.4517	5.04147	1.87184	5e-05	0.000627385
XM_006558442.1	410972	-	3151	31.5103	11.4567	1.45963	5e-05	0.000627385
[truncated: 4,223 more rows]

## Sheet: DE lncRNAs_and DE mRNAs Cag_Que
DE lncRNAs and DE mRNAs in oviposition inhibition process
transcript_id	gene_id	gene_name	length	Cag_FPKM	Que_FPKM	log2(foldchange)	pvalue	qvalue
NM_001011578.1	406088	-	5393	33.1086	6.04182	2.45415	5e-05	0.000627385
NM_001011616.2	406143	-	680	18.9791	7.05989	1.42669	5e-05	0.000627385
NM_001011627.1	406155	-	2482	3.80335	2.10508	0.853395	0.00085	0.00808185
NM_001011630.1	408689	-	617	200.709	98.0405	1.03366	5e-05	0.000627385
NM_001012429.1	503505	-	672	1023.57	564.808	0.857772	0.00105	0.00971924
NM_001012962.1	503861	-	3606	2.16494	1.30044	0.735333	0.00385	0.0297521
NM_001037318.2	410755	-	2515	25.5334	18.1186	0.494915	0.00205	0.0173499
NM_001040207.1	552478	-	1179	2.20616	0.746764	1.56281	0.0004	0.00415277
NM_001040223.1	677673	-	455	65.3017	19.7754	1.72342	5e-05	0.000627385
NM_001040224.1	677674	-	399	94.4068	13.7577	2.77865	5e-05	0.000627385
NM_001040229.1	677678	-	453	4.81004	1.81788	1.40379	0.0025	0.020608
NM_001040230.1	406104	-	12946	38.3077	27.1847	0.494841	0.0005	0.00505175
NM_001040234.1	409677	-	1500	10.521	5.59332	0.911493	5e-05	0.000627385
NM_001040259.1	411257	-	1743	243.967	66.2368	1.88098	5e-05	0.000627385
NM_001098229.1	726079	-	1284	0.968453	0.303197	1.67542	0.0011	0.0101285
NM_001126243.1	410337	-	2324	15.0645	10.9264	0.463332	0.00705	0.0496317
NM_001126244.1	410928	-	1832	3.51255	5.63193	-0.681108	0.005	0.037132
NM_001144839.1	551077	-	490	34.2161	20.6834	0.726204	0.0023	0.01916
NM_001160064.1	408928	-	2822	689.151	1055.5	-0.615029	0.0001	0.00119145
NM_001160072.1	410620	-	2237	10.0075	18.4295	-0.880932	5e-05	0.000627385
NM_001163714.1	411899	-	1542	17.3737	8.42714	1.04379	5e-05	0.000627385
NM_001170974.1	410066	-	1454	105.455	71.2984	0.564688	0.00045	0.00460371
NM_001172389.1	725932	-	1026	35.1807	22.3272	0.655984	0.00045	0.00460371
NM_001177490.1	408270	-	1080	116.281	158.209	-0.444213	0.00145	0.0128782
NM_001206973.1	552475	-	2299	3.33191	1.20499	1.46733	0.0002	0.00222634
NM_001242432.1	411132	-	2025	4.61609	1.13938	2.01843	5e-05	0.000627385
TCONS_00006930	XLOC_002460	-	717	5.12485	11.018	-1.10428	0.00025	0.00272364
TCONS_00007949	XLOC_002760	-	537	4.03449	7.61984	-0.917376	0.00625	0.0448285
TCONS_00015234	XLOC_005188	-	1718	11.0558	18.9594	-0.778102	0.0024	0.0198832
TCONS_00023254	XLOC_007885	-	4381	18.3928	55.288	-1.58782	0.0024	0.0198832
TCONS_00023255	XLOC_007885	-	1132	145.512	258.358	-0.828234	0.007	0.0493238
TCONS_00032354	XLOC_010780	-	2258	3.28392	5.9232	-0.85096	0.00025	0.00272364
TCONS_00032482	XLOC_010781	-	1293	7.42838	14.3186	-0.946774	5e-05	0.000627385
TCONS_00035136	XLOC_011700	-	716	59.4789	9.85565	2.59335	0.0055	0.0402605
TCONS_00039451	XLOC_012990	-	2907	13.4226	22.3404	-0.734987	5e-05	0.000627385
TCONS_00039472	XLOC_012992	-	6317	4.97913	8.19732	-0.719258	0.00515	0.0380683
TCONS_00039743	XLOC_013075	-	604	14.5332	36.1009	-1.31268	5e-05	0.000627385
TCONS_00041894	XLOC_013769	-	4942	5.04155	7.30871	-0.535749	0.00295	0.0237238
TCONS_00042467	XLOC_013964	-	908	7.81068	13.2179	-0.758977	0.00165	0.0143795
TCONS_00044408	XLOC_014632	-	890	1.50403	0.522348	1.52575	0.00465	0.0349042
TCONS_00044486	XLOC_014655	-	1715	3.68729	6.80959	-0.885008	0.00035	0.00368417
TCONS_00044520	XLOC_014660	-	1478	0.275135	0.869749	-1.66046	0.00195	0.0166197
TCONS_00056249	XLOC_017820	-	2719	1.84132	1.01525	0.858903	0.00305	0.0243978
TCONS_00058860	XLOC_018457	-	738	7.59999	2.16767	1.80985	5e-05	0.000627385
TCONS_00063173	XLOC_019801	-	2477	0.613793	2.41313	-1.97508	0.00105	0.00971924
TCONS_00064514	XLOC_020224	-	412	18.3829	37.5405	-1.03008	0.00025	0.00272364
TCONS_00066406	XLOC_020818	-	1185	0.484299	1.08411	-1.16254	0.0069	0.0487161
TCONS_00069371	XLOC_021803	-	3808	0.455182	0.11186	2.02475	0.0013	0.011703
TCONS_00073550	XLOC_023135	-	2330	0.525166	0.155579	1.75513	0.0008	0.00765733
TCONS_00073775	XLOC_023174	-	495	0.935752	3.17938	-1.76455	0.00405	0.0310638
TCONS_00075055	XLOC_023570	-	977	5.99633	3.10068	0.951494	0.00185	0.0158744
TCONS_00076946	XLOC_024066	-	1156	1.23597	4.19013	-1.76135	5e-05	0.000627385
TCONS_00085582	XLOC_031280	-	1046	4.67979	2.34733	0.995424	0.0023	0.01916
TCONS_00106800	XLOC_041005	-	796	1.01273	0.267865	1.91867	0.00565	0.0412009
TCONS_00131786	XLOC_045641	-	1531	0.758085	4.24099	-2.48397	0.00595	0.0430473
TCONS_00155650	XLOC_032886	-	1953	22.7488	10.7752	1.07807	0.0008	0.00765733
TCONS_00186528	XLOC_047901	-	793	189	96.4546	0.970464	0.00565	0.0412009
TCONS_00190649	XLOC_033436	-	15108	1.10902	0.694896	0.674418	0.0018	0.0155092
TCONS_00206995	XLOC_059514	-	10796	0.982501	0.514471	0.933368	0.00015	0.00171726
TCONS_00212587	XLOC_067326	-	3624	0.811353	0.232469	1.80329	0.00015	0.00171726
TCONS_00239279	XLOC_061328	-	887	0.8226	3.04665	-1.88896	0.0048	0.0358743
TCONS_00244214	XLOC_063845	-	3956	0.431901	1.97784	-2.19515	0.0004	0.00415277
TCONS_00255730	XLOC_063655	-	3567	0.528454	0.251467	1.07141	0.00515	0.0380683
TCONS_00273170	XLOC_077726	-	2397	8.79788	5.71998	0.621146	0.00185	0.0158744
TCONS_00292623	XLOC_080132	-	1455	2.13869	0.871808	1.29464	0.0002	0.00222634
TCONS_00299027	XLOC_074967	-	751	7.09459	3.22063	1.13938	0.0006	0.00594174
TCONS_00303106	XLOC_075382	-	1428	3.67341	1.00882	1.86445	0.00645	0.0460834
TCONS_00370946	XLOC_102959	-	4190	0.766489	0.325581	1.23525	0.0064	0.0457816
TCONS_00373679	XLOC_108104	-	7822	3.27643	2.03088	0.690022	0.00455	0.0342807
TCONS_00401505	XLOC_110621	-	721	126.036	94.6727	0.41282	0.00685	0.0484114
TCONS_00418118	XLOC_107046	-	6371	1.03278	0.498478	1.05093	5e-05	0.000627385
TCONS_00418451	XLOC_108103	-	9580	1.85753	1.20043	0.629828	0.00175	0.015129
TCONS_00424872	XLOC_120966	-	1678	0.970609	0.410723	1.24072	0.0037	0.0287608
TCONS_00426093	XLOC_114680	-	949	4.63905	2.45912	0.915688	0.00365	0.0284205
TCONS_00459577	XLOC_124310	-	3024	0.468212	0.181445	1.36763	0.0015	0.0132566
TCONS_00466281	XLOC_127534	-	225	49.1002	15.4359	1.66944	0.007	0.0493238
TCONS_00472852	XLOC_126567	-	4071	23.237	13.1556	0.820744	5e-05	0.000627385
TCONS_00486158	XLOC_126567	-	1879	19.3181	9.18152	1.07315	0.00315	0.025083
TCONS_00533439	XLOC_149596	-	2141	1.25311	0.526005	1.25237	0.00145	0.0128782
TCONS_00535860	XLOC_153508	-	3834	1.44568	0.556069	1.37841	0.00305	0.0243978
TCONS_00549860	XLOC_150149	-	4361	0.603084	0.239258	1.33379	0.00085	0.00808185
TCONS_00583817	XLOC_146750	-	812	1.51531	0.415556	1.8665	0.00255	0.0209604
TCONS_00589262	XLOC_147619	-	1642	23.3214	15.2105	0.616585	0.00065	0.00638377
TCONS_00595236	XLOC_149652	-	14219	1.51472	0.960352	0.657415	0.0033	0.0260853
TCONS_00605444	XLOC_162713	-	10117	5.84514	2.56017	1.191	5e-05	0.000627385
TCONS_00606513	XLOC_164289	-	3925	0.637864	0.324501	0.975027	0.00605	0.0436104
TCONS_00617293	XLOC_165602	-	631	0.488556	3.96094	-3.01925	0.00015	0.00171726
TCONS_00627497	XLOC_160106	-	5153	1.55548	0.933561	0.73654	0.00335	0.026426
TCONS_00635911	XLOC_165608	-	326	0	2.39419	#NAME?	5e-05	0.000627385
TCONS_00651349	XLOC_165610	-	370	0	1.24389	#NAME?	5e-05	0.000627385
TCONS_00707691	XLOC_190294	-	2468	1.33632	2.82176	-1.07833	0.00575	0.0418311
TCONS_00708735	XLOC_192432	-	618	0.768298	5.30224	-2.78687	0.00065	0.00638377
TCONS_00709518	XLOC_193333	-	8479	3.08828	1.47275	1.06829	0.00195	0.0166197
TCONS_00709526	XLOC_193341	-	1128	12.2882	2.39329	2.36021	0.0063	0.0451529
TCONS_00709981	XLOC_194325	-	643	2.72915	0.940055	1.53763	0.00205	0.0173499
TCONS_00718582	XLOC_196749	-	570	2.40255	0.667814	1.84705	0.00235	0.0195215
TCONS_00744245	XLOC_187361	-	5836	1.26812	2.31879	-0.870676	0.00025	0.00272364
TCONS_00754371	XLOC_190534	-	3454	7.85191	4.27026	0.878722	5e-05	0.000627385
TCONS_00759081	XLOC_190463	-	1205	6.62748	3.5691	0.892899	0.00455	0.0342807
TCONS_00770712	XLOC_207359	-	664	1.30447	3.34072	-1.35669	0.0014	0.0124897
TCONS_00771855	XLOC_209235	-	583	49.3398	18.0509	1.45068	5e-05	0.000627385
TCONS_00803786	XLOC_212934	-	7185	1.40143	0.564612	1.31157	0.00375	0.0290952
TCONS_00837086	XLOC_210441	-	14712	10.5728	7.24694	0.544909	0.0002	0.00222634
TCONS_00838899	XLOC_216577	-	1206	0.711535	0.226217	1.65322	0.00645	0.0460834
TCONS_00874814	XLOC_225408	-	2403	6.64048	10.599	-0.67457	0.00025	0.00272364
TCONS_00903442	XLOC_236091	-	2398	17.5323	11.334	0.629351	0.00015	0.00171726
TCONS_00910115	XLOC_238068	-	1245	1.59749	0.582024	1.45666	0.00085	0.00808185
TCONS_00911682	XLOC_241102	-	5285	3.16675	1.4663	1.11083	0.00275	0.0223437
TCONS_00918699	XLOC_236299	-	2091	2.74337	1.31173	1.06448	0.00015	0.00171726
TCONS_00935496	XLOC_241083	-	879	45.5175	24.9234	0.868925	0.001	0.00932037
TCONS_00936929	XLOC_234261	-	2879	1.18424	2.63884	-1.15595	0.00015	0.00171726
TCONS_00949203	XLOC_246707	-	3557	5.45304	3.7379	0.544834	0.00645	0.0460834
TCONS_00953029	XLOC_252883	-	4975	5.78065	3.80298	0.6041	0.003	0.0240508
TCONS_00959499	XLOC_253292	-	5235	1.24112	0.384979	1.6888	5e-05	0.000627385
XM_001119879.3	724580	-	764	23.9841	8.20569	1.54738	5e-05	0.000627385
XM_001120006.3	724367	-	966	14.4478	8.60065	0.748329	0.0012	0.01092
XM_001120045.3	724252	-	5631	0.597343	0.298027	1.00312	0.0013	0.011703
XM_001120136.3	724899	-	1786	1.01257	0.395176	1.35746	0.0012	0.01092
XM_001120137.3	724449	-	1347	16.1932	7.53387	1.10392	5e-05	0.000627385
XM_001120194.3	724488	-	872	5.27131	9.61335	-0.86688	0.0012	0.01092
XM_001120328.3	724466	-	1778	1.25895	0.648773	0.956438	0.00605	0.0436104
XM_001120351.3	725309	-	765	67.3675	46.2914	0.541309	0.00155	0.0136406
XM_001120442.3	724552	-	2114	7.24956	14.017	-0.95121	0.00625	0.0448285
XM_001120478.3	725813	-	1979	13.3234	8.00589	0.734833	0.00015	0.00171726
XM_001120635.3	724743	-	2607	11.1738	4.20248	1.41081	0.0033	0.0260853
XM_001120675.3	724776	-	1494	10.4789	4.19597	1.32041	5e-05	0.000627385
XM_001120678.3	724779	-	4557	34.854	54.1507	-0.635654	5e-05	0.000627385
XM_001120679.3	724780	-	2161	1.79512	4.05903	-1.17706	0.0002	0.00222634
XM_001120695.3	726118	-	423	390.571	528.066	-0.435132	0.00365	0.0284205
XM_001120735.3	726629	-	695	9.39085	4.0625	1.20889	0.00015	0.00171726
XM_001120736.3	724833	-	2586	25.1089	13.8867	0.8545	5e-05	0.000627385
XM_001120814.3	724914	-	2656	8.62477	5.95399	0.53463	0.00485	0.0361888
XM_001120875.3	724975	-	4067	8.11075	5.47282	0.567551	0.0056	0.0408847
XM_001120917.3	725015	-	3346	52.4431	37.8872	0.469042	0.0016	0.0140101
XM_001120933.3	725032	-	467	31.8702	18.0735	0.818328	0.00155	0.0136406
XM_001120991.3	725106	-	2968	28.2925	15.1812	0.898133	0.0007	0.006805
XM_001121096.3	725219	-	1473	6.97459	2.89466	1.26871	5e-05	0.000627385
XM_001121151.3	725283	-	1574	23.3972	5.94528	1.97652	5e-05	0.000627385
XM_001121271.3	725420	-	2570	3.06811	0.562376	2.44775	5e-05	0.000627385
XM_001121381.3	725548	-	1386	57.9058	37.4083	0.630349	0.0001	0.00119145
XM_001121473.3	725651	-	4363	13.9483	8.2623	0.75547	5e-05	0.000627385
XM_001121838.3	726068	-	5941	21.8836	13.9409	0.650524	5e-05	0.000627385
XM_001121915.3	726155	-	3329	0.962463	0.52089	0.885753	0.00575	0.0418311
XM_001121948.3	726192	-	918	8.8833	22.1384	-1.31738	0.00035	0.00368417
XM_001121969.3	726213	-	1436	19.1619	11.5396	0.731649	0.0001	0.00119145
XM_001122039.3	726288	-	2128	0.493964	0.182177	1.43906	0.00395	0.0303824
XM_001122057.3	726309	-	2883	134.923	196.188	-0.5401	0.0001	0.00119145
XM_001122113.3	726370	-	3198	1.29864	2.17444	-0.74364	0.00615	0.0442345
XM_001122176.3	726441	-	1550	12.1254	6.1844	0.971329	5e-05	0.000627385
XM_001122432.3	726709	-	13179	10.2855	5.78672	0.829793	0.00165	0.0143795
XM_001122470.3	726750	-	4687	1.16763	0.226538	2.36576	5e-05	0.000627385
XM_001122554.3	726836	-	777	10.6128	4.86433	1.12549	5e-05	0.000627385
XM_001122582.3	726866	-	1954	15.1785	10.1472	0.580947	0.0011	0.0101285
XM_001122612.3	726896	-	5587	1.17683	0.665768	0.82181	0.00155	0.0136406
XM_001122685.3	726969	-	987	67.0866	91.5438	-0.448438	0.0028	0.0226888
XM_001122704.3	726990	-	1697	0.438709	1.46429	-1.73887	0.0033	0.0260853
XM_001122848.3	727135	-	4035	24.3191	17.9661	0.436812	0.00265	0.0216517
XM_001123051.3	727342	-	973	53.3857	37.2125	0.520667	0.00195	0.0166197
XM_001123067.3	727358	-	1724	1.54667	0.4049	1.93353	5e-05	0.000627385
XM_001123122.3	727412	-	1132	0.834145	2.32677	-1.47996	0.0003	0.00321156
XM_001123131.3	727423	-	1392	21.6849	9.66856	1.16532	5e-05	0.000627385
XM_001123264.2	727555	-	550	9.95387	4.98277	0.998311	0.002	0.0169774
XM_001123318.1	727611	-	721	7.45707	3.92927	0.924346	0.0017	0.0147499
XM_003249144.2	100576614	-	1367	3.04811	5.22565	-0.777695	0.00525	0.0386843
XM_003249174.2	410013	-	1554	0.443257	6.75365	-3.92945	0.0001	0.00119145
XM_003249194.2	100576326	-	3323	23.7767	16.9365	0.489415	0.0013	0.011703
XM_003249293.2	100578696	-	3526	17.72	12.4716	0.506736	0.00115	0.0105259
XM_003249381.2	100576406	-	1475	3.87304	8.64688	-1.15871	5e-05	0.000627385
XM_003249605.2	100576934	-	2494	5.74454	2.53473	1.18036	0.00605	0.0436104
XM_003249976.2	413020	-	2360	16.0736	8.16867	0.97652	5e-05	0.000627385
XM_003250037.2	100576444	-	413	1.21135	0	inf	5e-05	0.000627385
XM_003250045.2	100577698	-	1550	460.1	275.265	0.741126	5e-05	0.000627385
XM_003250093.2	100577725	-	542	2.42832	0.547827	2.14816	0.00195	0.0166197
XM_003250285.2	100576224	-	1324	4.44867	8.97336	-1.01227	0.0001	0.00119145
XM_003250369.2	100576116	-	3382	21.2042	15.8277	0.421896	0.00695	0.0490203
XM_003250380.2	100577396	-	1079	20.8958	13.873	0.590934	0.00265	0.0216517
XM_003250479.2	100577480	-	2145	69.631	52.549	0.406068	0.0044	0.0332976
XM_003250766.2	726268	-	1444	38.3955	18.2355	1.07418	0.0014	0.0124897
XM_003251062.2	100578085	-	1118	21.5549	14.4551	0.576436	0.00405	0.0310638
XM_003251147.2	410867	-	9100	19.9152	14.1348	0.494623	0.00055	0.00549577
XM_003251269.2	100577635	-	9363	20.7036	14.2913	0.53475	0.00025	0.00272364
XM_003251375.2	100578466	-	2252	3.01902	1.32242	1.1909	5e-05	0.000627385
XM_003251416.2	551176	-	2114	1.89264	4.299	-1.1836	0.00105	0.00971924
XM_003251446.2	100577499	-	1433	29.247	42.0429	-0.523571	0.00125	0.0113133
XM_003251496.2	100576279	-	2111	1.67284	0.709917	1.23658	0.0003	0.00321156
XM_003251519.2	100576179	-	6242	5.64802	3.73182	0.597866	0.0015	0.0132566
XM_003251744.2	100577847	-	3346	8.00617	4.9571	0.691618	0.00015	0.00171726
XM_003251959.2	100578021	-	844	24.8411	5.01348	2.30885	5e-05	0.000627385
XM_003251975.2	100576351	-	688	2.58829	1.11447	1.21565	0.00675	0.0478144
XM_006557268.1	100578259	-	1291	6.12286	9.64373	-0.655386	0.0041	0.0313827
XM_006557341.1	100576993	-	4243	19.4753	13.746	0.502633	0.0006	0.00594174
XM_006557357.1	100578031	-	3418	16.1222	10.7874	0.5797	0.00025	0.00272364
XM_006557675.1	552005	-	2764	51.0233	27.5091	0.891245	5e-05	0.000627385
XM_006557837.1	551796	-	5044	1.01846	0.598997	0.765768	0.00495	0.0368224
XM_006558063.1	551988	-	2941	9.8599	5.97493	0.72265	0.00205	0.0173499
XM_006558212.1	413002	-	1920	2.7562	6.11379	-1.14938	0.0001	0.00119145
XM_006558321.1	409881	-	1122	10.5924	16.5007	-0.639491	0.0032	0.0254182
XM_006558668.1	411053	-	11477	1.68623	0.711047	1.24578	0.0006	0.00594174
XM_006558906.1	413739	-	4382	11.4638	6.19138	0.888748	5e-05	0.000627385
XM_006559126.1	724736	-	2901	18.4553	7.58465	1.28288	0.00125	0.0113133
XM_006559127.1	724716	-	1153	30.1092	14.2428	1.07998	5e-05	0.000627385
XM_006559177.1	409277	-	1179	3.20055	1.60012	1.00014	0.0016	0.0140101
XM_006559203.1	102655670	-	476	39.1196	60.6282	-0.632098	0.0027	0.0220069
XM_006559813.1	102655332	-	2220	11.3213	5.25878	1.10625	5e-05	0.000627385
XM_006559982.1	552479	-	3273	173.318	83.615	1.05159	5e-05	0.000627385
XM_006560014.1	725074	-	660	470.777	201.947	1.22107	5e-05	0.000627385
XM_006560026.1	100577393	-	6268	13.3779	10.0863	0.407453	0.00475	0.0355475
XM_006560083.1	408414	-	1555	5.05434	8.1747	-0.693644	0.00215	0.0180806
XM_006560199.1	413582	-	2301	6.98292	4.26153	0.712459	0.001	0.00932037
XM_006560371.1	408429	-	6998	78.3908	47.2169	0.73138	0.0003	0.00321156
XM_006560557.1	550671	-	1420	4.73428	7.68329	-0.698581	0.00275	0.0223437
XM_006560586.1	408817	-	1861	412.393	556.132	-0.431408	0.00295	0.0237238
XM_006560712.1	412859	-	4250	36.642	24.4801	0.581893	0.00015	0.00171726
XM_006560713.1	724515	-	6433	1.35097	0.545418	1.30857	0.0025	0.020608
XM_006560726.1	408715	-	1786	21.96	12.617	0.799504	0.0039	0.0300614
XM_006560876.1	412883	-	5140	4.32268	2.1094	1.0351	5e-05	0.000627385
XM_006560911.1	410944	-	6181	1.97636	3.91196	-0.985041	5e-05	0.000627385
XM_006560967.1	551170	-	58059	0.407626	0.911249	-1.1606	5e-05	0.000627385
XM_006560970.1	100577047	-	3067	14.6371	9.5933	0.609534	0.0004	0.00415277
XM_006560977.1	412775	-	13110	0.57996	0.33905	0.774455	0.00245	0.0202465
XM_006560993.1	102655709	-	3833	0.657641	0.245232	1.42315	0.00035	0.00368417
XM_006560994.1	102655899	-	3060	1.77074	0.803374	1.14021	0.0001	0.00119145
XM_006561046.1	408536	-	3693	24.8311	9.95789	1.31824	0.00425	0.0323387
XM_006561047.1	408536	-	3584	114.876	66.1866	0.795471	5e-05	0.000627385
XM_006561234.1	409868	-	2520	83.7612	51.9401	0.689431	0.00355	0.0277701
XM_006561290.1	725570	-	1701	10.9833	6.05966	0.858001	0.00025	0.00272364
XM_006561306.1	100577894	-	3759	2.70732	4.21916	-0.640093	0.0027	0.0220069
XM_006561492.1	408961	-	10859	24.5081	2.08534	3.5549	5e-05	0.000627385
XM_006561690.1	725026	-	1493	33.504	15.9655	1.06937	5e-05	0.000627385
XM_006561697.1	100577440	-	757	5.94522	2.80451	1.08398	0.00585	0.0424518
XM_006561798.1	100578512	-	7004	0.924779	0.453411	1.02829	0.00015	0.00171726
XM_006561800.1	726818	-	2218	3.13052	1.63116	0.940503	0.00035	0.00368417
XM_006561896.1	411330	-	2888	0.412195	0.131211	1.65144	0.0008	0.00765733
XM_006562018.1	409174	-	7512	5.69748	3.99676	0.511493	0.00175	0.015129
XM_006562163.1	411065	-	4219	2.46435	0.272585	3.17643	0.00665	0.0472359
XM_006562287.1	410369	-	7953	31.5583	22.1761	0.509012	0.0002	0.00222634
XM_006562300.1	408453	-	1712	1.64556	0.582283	1.49879	0.0001	0.00119145
XM_006562301.1	410492	-	1975	9.67222	5.34926	0.854507	5e-05	0.000627385
XM_006562305.1	551846	-	3924	13.4719	5.21895	1.36812	0.0003	0.00321156
XM_006562362.1	413749	-	2220	34.763	24.9573	0.478095	0.00205	0.0173499
XM_006562568.1	408937	-	1636	40.1703	58.3043	-0.537471	0.00035	0.00368417
XM_006562604.1	100576878	-	2597	30.6552	19.354	0.6635	5e-05	0.000627385
XM_006562719.1	411036	-	2046	4.04489	2.24742	0.847832	0.0013	0.011703
XM_006562853.1	410235	-	9134	10.0065	7.4259	0.430295	0.00475	0.0355475
XM_006562940.1	410515	-	6808	0.103708	0.493716	-2.25116	5e-05	0.000627385
XM_006563203.1	503505	-	1628	644.217	359.911	0.839907	5e-05	0.000627385
XM_006563308.1	552367	-	1995	26.8897	62.5505	-1.21797	5e-05	0.000627385
XM_006563323.1	408521	-	24736	9.66538	5.75209	0.748741	5e-05	0.000627385
XM_006563411.1	409666	-	3975	9.65724	4.08946	1.2397	0.0002	0.00222634
XM_006563493.1	410600	-	7193	21.0357	14.7507	0.512053	0.0023	0.01916
XM_006563555.1	726069	-	5349	3.18751	1.41296	1.1737	0.0012	0.01092
XM_006563688.1	410573	-	3962	1.30502	0.503228	1.37479	0.001	0.00932037
XM_006563865.1	413106	-	2665	45.304	28.1368	0.687177	0.001	0.00932037
XM_006563866.1	413106	-	2760	37.1466	20.9532	0.826058	0.0006	0.00594174
XM_006563873.1	724864	-	1104	8.52853	4.59697	0.891614	0.0005	0.00505175
XM_006564045.1	408435	-	5662	7.66276	3.76296	1.026	5e-05	0.000627385
XM_006564046.1	410465	-	3673	1.719	0.971671	0.82303	0.00215	0.0180806
XM_006564049.1	410467	-	5685	0.589985	0.266563	1.1462	0.00075	0.00723644
XM_006564064.1	551249	-	5444	7.77682	4.79549	0.697504	5e-05	0.000627385
XM_006564234.1	727293	-	1761	7.7274	15.3178	-0.987155	5e-05	0.000627385
XM_006564235.1	102656247	-	1657	0.84724	1.9543	-1.20581	0.00175	0.015129
XM_006564241.1	550655	-	3875	22.4799	15.6342	0.523933	0.0006	0.00594174
XM_006564436.1	551560	-	1529	0.62859	0.208558	1.59167	0.00365	0.0284205
XM_006564551.1	102656078	-	1878	64.7285	43.1789	0.584075	0.0001	0.00119145
XM_006564557.1	409367	-	988	38.1937	26.1025	0.549145	0.00255	0.0209604
XM_006564693.1	413676	-	4389	1.29723	0.768452	0.755406	0.00465	0.0349042
XM_006564945.1	724293	-	4548	44.0462	22.7545	0.952864	5e-05	0.000627385
XM_006565072.1	726690	-	3558	4.25172	2.84975	0.57721	0.00605	0.0436104
XM_006565440.1	408926	-	5795	12.7726	8.90071	0.521063	0.0061	0.0439284
XM_006565450.1	102656570	-	2432	30.721	14.2872	1.1045	0.0003	0.00321156
XM_006565486.1	724568	-	2719	15.8501	9.4363	0.748195	5e-05	0.000627385
XM_006565841.1	100577827	-	1186	1.00171	0.307613	1.70328	0.0017	0.0147499
XM_006565934.1	724425	-	1447	1.44533	3.46897	-1.26311	0.00015	0.00171726
XM_006566035.1	410204	-	7965	20.2384	9.26904	1.1266	5e-05	0.000627385
XM_006566111.1	725422	-	4990	11.9944	7.60992	0.656407	0.0014	0.0124897
XM_006566193.1	413925	-	6559	1.12444	0.388652	1.53265	0.00325	0.0257619
XM_006566382.1	408359	-	3327	18.4813	8.60048	1.10358	0.007	0.0493238
XM_006566384.1	408359	-	3167	19.1181	10.1129	0.91874	0.0014	0.0124897
XM_006566389.1	408361	-	1359	421.545	180.112	1.2268	5e-05	0.000627385
XM_006566390.1	408361	-	3103	94.8439	42.0591	1.17314	5e-05	0.000627385
XM_006566392.1	552408	-	1399	32.6907	10.9459	1.57849	5e-05	0.000627385
XM_006566620.1	100576557	-	3078	6.07678	2.68538	1.17818	0.0059	0.0427402
XM_006566818.1	413324	-	1977	93.9898	128.256	-0.448449	0.00595	0.0430473
XM_006566836.1	726953	-	2764	12.1278	6.46168	0.908343	5e-05	0.000627385
XM_006566838.1	551572	-	1465	45.8407	18.6812	1.29504	5e-05	0.000627385
XM_006566946.1	724243	-	3300	31.8341	16.6445	0.935528	0.00115	0.0105259
XM_006567292.1	409981	-	9465	0.430758	0.197863	1.12237	0.00095	0.00890592
XM_006567319.1	102656217	-	2957	17.8851	25.2965	-0.500177	0.00265	0.0216517
XM_006567334.1	677671	-	634	11.8278	2.74131	2.10924	5e-05	0.000627385
XM_006567389.1	408987	-	7253	78.2612	54.7681	0.514962	0.00025	0.00272364
XM_006567581.1	102654795	-	6058	0.77098	0.395169	0.964222	0.001	0.00932037
XM_006567779.1	724743	-	2595	18.3953	9.03136	1.02632	0.0032	0.0254182
XM_006567783.1	411113	-	9274	7.42904	5.15823	0.5263	0.0015	0.0132566
XM_006567922.1	100577955	-	1943	6.54574	11.9907	-0.873292	5e-05	0.000627385
XM_006568041.1	409714	-	4726	81.119	59.3251	0.451397	0.0022	0.0184409
XM_006568150.1	408689	-	1175	51.3866	20.2095	1.34636	5e-05	0.000627385
XM_006568268.1	725804	-	1647	0.904206	3.22709	-1.83551	5e-05	0.000627385
XM_006568419.1	724652	-	5462	13.8753	18.8344	-0.44085	0.0028	0.0226888
XM_006568515.1	551263	-	1994	3.22286	16.3757	-2.34514	5e-05	0.000627385
XM_006568755.1	409821	-	23305	29.5113	16.5609	0.833488	5e-05	0.000627385
XM_006568778.1	724852	-	1956	5.96778	3.07605	0.956115	0.00425	0.0323387
XM_006569255.1	100577513	-	1537	5.01959	2.23787	1.16545	0.0001	0.00119145
XM_006569299.1	100577397	-	5048	3.15449	2.09168	0.592744	0.0042	0.0320253
XM_006569372.1	550918	-	4454	51.9861	31.9353	0.702976	5e-05	0.000627385
XM_006569374.1	414051	-	2503	35.6405	20.4368	0.802348	0.00235	0.0195215
XM_006569404.1	100578269	-	1663	3.56358	0.619034	2.52524	0.0007	0.006805
XM_006569426.1	724569	-	6958	14.4864	9.57333	0.597609	5e-05	0.000627385
XM_006569466.1	725966	-	3573	2.0599	0.684925	1.58856	5e-05	0.000627385
XM_006569554.1	726944	-	2046	22.0695	9.28186	1.24957	5e-05	0.000627385
XM_006569617.1	726060	-	2846	58.6263	44.7523	0.389585	0.0054	0.0396288
XM_006569658.1	410175	-	4719	10.7979	7.64632	0.497911	0.00165	0.0143795
XM_006569734.1	726625	-	1821	47.1917	73.812	-0.645321	5e-05	0.000627385
XM_006569770.1	411894	-	14027	0.806069	0.457548	0.81698	0.00035	0.00368417
XM_006569823.1	725485	-	8959	12.5213	8.90038	0.492451	0.00045	0.00460371
XM_006569934.1	409043	-	5829	13.3615	9.1942	0.539288	0.001	0.00932037
XM_006569958.1	552545	-	1822	32.8535	20.9636	0.648164	0.00015	0.00171726
XM_006570227.1	410096	-	2084	82.6964	119.167	-0.52709	0.00035	0.00368417
XM_006570241.1	102656767	-	764	49.9352	28.6432	0.801863	0.0001	0.00119145
XM_006570263.1	726879	-	7577	3.97482	2.32308	0.774853	5e-05	0.000627385
XM_006570264.1	726914	-	1120	62.305	37.1736	0.74507	5e-05	0.000627385
XM_006570276.1	726294	-	3351	12.8529	7.51995	0.773297	5e-05	0.000627385
XM_006570328.1	100578976	-	3542	15.6387	9.9193	0.65681	5e-05	0.000627385
XM_006570334.1	410270	-	7954	15.5037	7.8732	0.97759	5e-05	0.000627385
XM_006570414.1	413583	-	5243	52.1365	37.9674	0.457533	0.0007	0.006805
XM_006570433.1	410271	-	4161	2.6695	1.20833	1.14356	0.0049	0.0365022
XM_006570434.1	410271	-	3429	9.40313	5.3269	0.819846	0.0001	0.00119145
XM_006570490.1	413097	-	11725	4.48623	3.09322	0.536391	0.0005	0.00505175
XM_006570507.1	412986	-	1853	100.725	136.702	-0.440605	0.00285	0.0230215
XM_006570565.1	408872	-	2569	14.5377	23.2492	-0.677387	5e-05	0.000627385
XM_006570911.1	102656095	-	1590	5.81509	3.51327	0.726985	0.00355	0.0277701
XM_006571133.1	551356	-	24352	35.3386	22.1783	0.672098	5e-05	0.000627385
XM_006571156.1	552251	-	5523	5.11805	3.51391	0.542518	0.0035	0.0274366
XM_006571272.1	411700	-	2523	235.963	325.824	-0.465533	0.00105	0.00971924
XM_006571296.1	413575	-	5241	15.5909	38.8905	-1.31871	5e-05	0.000627385
XM_006571434.1	408645	-	9620	3.17305	1.61212	0.976906	5e-05	0.000627385
XM_006571436.1	100577043	-	1559	5.99134	1.39654	2.10102	0.0003	0.00321156
XM_006571461.1	102655636	-	494	2.57167	13.922	-2.43659	5e-05	0.000627385
XM_006571970.1	552238	-	2235	4.26471	0.849204	2.32826	5e-05	0.000627385
XM_006572008.1	727485	-	1754	14.6966	10.3139	0.510891	0.00625	0.0448285
XM_006572103.1	726925	-	1352	4.33858	0.785274	2.46595	5e-05	0.000627385
XM_006572114.1	102653626	-	2163	0.0938533	0.4524	-2.26912	0.00545	0.0399254
XM_006572144.1	727173	-	1617	3.59782	7.42327	-1.04493	0.0023	0.01916
XM_006572206.1	411535	-	3193	10.6136	19.5573	-0.881795	0.0017	0.0147499
XM_006572239.1	102655120	-	636	23.5882	13.1826	0.839427	0.00045	0.00460371
XM_006572284.1	412663	-	10681	11.2816	15.1102	-0.421554	0.0023	0.01916
XM_006572293.1	551782	-	2210	12.3478	5.38711	1.19667	5e-05	0.000627385
XM_006572392.1	724711	-	476	6.00999	20.2774	-1.75444	5e-05	0.000627385
XM_006572418.1	102655005	-	1070	135.457	203.874	-0.589844	0.00015	0.00171726
XM_006572419.1	552604	-	2057	7.25421	3.61583	1.00449	5e-05	0.000627385
XM_006572422.1	102655303	-	1297	1.25876	0.498772	1.33554	0.00635	0.0454629
XM_006572443.1	727202	-	943	2.19541	0.169351	3.6964	0.00025	0.00272364
XM_006572587.1	725305	-	1823	2.27329	1.30236	0.803652	0.00695	0.0490203
XM_006572710.1	727159	-	1065	185.61	130.227	0.511246	0.0006	0.00594174
XM_391848.4	408297	-	5269	0.547568	0.161421	1.76221	0.0044	0.0332976
XM_391915.4	408365	-	2577	2.21555	1.25223	0.823168	0.00395	0.0303824
XM_391991.3	408443	-	4403	5.31991	3.45112	0.624336	0.0016	0.0140101
XM_392145.5	408603	-	3038	1.09164	0.380313	1.52124	5e-05	0.000627385
XM_392190.5	408650	-	1496	23.3332	16.7629	0.477116	0.00685	0.0484114
XM_392238.5	408702	-	1330	67.0996	43.9288	0.611136	5e-05	0.000627385
XM_392390.4	408859	-	1512	29.1641	19.9047	0.551084	0.0021	0.0177095
XM_392513.5	408981	-	2570	15.7159	10.6578	0.560319	0.00135	0.0120939
XM_392617.5	409091	-	3316	13.898	7.07126	0.974835	5e-05	0.000627385
XM_392667.5	409141	-	1446	28.6459	68.2436	-1.25237	5e-05	0.000627385
XM_392698.5	409173	-	1863	0.156406	1.72458	-3.46288	0.0005	0.00505175
XM_392752.5	409228	-	2340	28.8977	17.4786	0.725363	5e-05	0.000627385
XM_392899.5	409384	-	2846	252.4	334.007	-0.404163	0.00375	0.0290952
XM_393000.4	409493	-	2171	8.43305	5.7855	0.543615	0.00685	0.0484114
XM_393036.4	409530	-	3828	11.3991	8.07178	0.497957	0.00285	0.0230215
XM_393053.4	409546	-	2591	7.31372	3.96561	0.883061	0.0009	0.00850416
XM_393105.5	409602	-	1492	9.90124	1.80796	2.45324	5e-05	0.000627385
XM_393237.5	409740	-	1361	8.97817	17.016	-0.922395	0.00325	0.0257619
XM_393283.5	409789	-	2245	11.1289	16.6824	-0.584011	0.0024	0.0198832
XM_393292.4	409800	-	2117	3.0105	1.24607	1.27261	0.00015	0.00171726
XM_393650.5	410166	-	4246	14.3886	9.96129	0.530525	0.0019	0.0162503
XM_393715.5	410233	-	5831	37.3908	16.0427	1.22077	5e-05	0.000627385
XM_393751.5	410270	-	6416	3.48575	1.00473	1.79465	0.00165	0.0143795
XM_393944.4	410464	-	4049	6.48502	4.39567	0.561029	0.00275	0.0223437
XM_393996.5	410517	-	4253	9.4175	6.48825	0.537515	0.0011	0.0101285
XM_394034.5	410555	-	3693	1.64903	0.676049	1.28641	5e-05	0.000627385
XM_394139.4	410662	-	1315	305.435	217.116	0.492399	0.00035	0.00368417
XM_394463.5	410988	-	1568	0.301741	0.764663	-1.34152	0.005	0.037132
XM_394686.5	411212	-	6001	1.93679	1.08947	0.830044	0.00025	0.00272364
XM_394886.4	411412	-	2658	17.6913	12.7145	0.476567	0.0031	0.0247363
XM_395083.5	411613	-	1328	17.2216	11.106	0.632876	0.00135	0.0120939
XM_395153.5	411685	-	2969	91.0511	64.2243	0.503557	0.0002	0.00222634
XM_395197.5	411729	-	4309	5.90134	3.44782	0.775359	5e-05	0.000627385
XM_395554.3	412088	-	7299	5.14943	3.36607	0.613348	0.0003	0.00321156
XM_395611.4	412147	-	4998	2.92403	6.05692	-1.05063	5e-05	0.000627385
XM_395651.5	412188	-	471	4.11899	1.6597	1.31137	0.00685	0.0484114
XM_395671.4	412209	-	1799	11.5354	5.20808	1.14725	5e-05	0.000627385
XM_396224.5	412771	-	1668	23.2997	32.2661	-0.469712	0.00315	0.025083
XM_396310.4	412858	-	6187	0.773826	0.354405	1.12661	0.00025	0.00272364
XM_396520.5	413069	-	2852	22.1332	15.9591	0.47183	0.0018	0.0155092
XM_396791.4	413346	-	2143	25.2608	16.9472	0.575853	0.0004	0.00415277
XM_396803.4	413358	-	3372	49.8328	37.736	0.401155	0.0051	0.0377539
XM_396813.5	413368	-	6791	1.41019	2.60673	-0.886356	0.00175	0.015129
XM_396815.4	413370	-	4219	6.92659	2.68635	1.3665	5e-05	0.000627385
XM_396872.4	413428	-	9977	0.753656	0.473937	0.669211	0.0067	0.0475268
XM_396873.5	413429	-	1880	25.5531	15.9933	0.676032	5e-05	0.000627385
XM_396925.5	413481	-	3416	0.112822	0.451836	-2.00175	5e-05	0.000627385
XM_396933.5	413489	-	1846	34.9047	16.4415	1.08608	5e-05	0.000627385
XM_397331.5	413892	-	2442	9.40046	6.00162	0.647381	0.0016	0.0140101
XM_397509.5	408561	-	2485	17.4837	11.6131	0.590256	0.00045	0.00460371
XM_397526.5	408807	-	1225	3.19725	0.797439	2.00338	0.0028	0.0226888
XM_623359.4	550965	-	2021	0.892329	0.359601	1.31118	0.0022	0.0184409
XM_623424.4	551028	-	3129	0.58998	0.292933	1.01009	0.00635	0.0454629
XM_623720.4	551323	-	2670	2.83617	1.18581	1.25806	0.00115	0.0105259
XM_623767.4	551372	-	1365	3.75275	1.64563	1.18931	0.00015	0.00171726
XM_623964.4	551572	-	1527	35.9889	12.1409	1.56768	5e-05	0.000627385
XM_623988.4	551597	-	8135	2.52372	3.83396	-0.603283	0.00045	0.00460371
XM_624172.4	551787	-	3339	24.4055	18.458	0.402961	0.0071	0.0499217
XM_624178.4	551793	-	3842	173.93	109.065	0.67332	5e-05	0.000627385
XM_624191.4	551806	-	2168	30.8094	21.626	0.510606	0.00105	0.00971924
XM_624230.4	551845	-	2707	22.0793	13.7723	0.680927	5e-05	0.000627385
XM_624280.4	551894	-	2286	18.3725	13.3697	0.458579	0.00565	0.0412009
XM_624321.4	551938	-	1018	7.29149	14.2948	-0.971207	0.0058	0.0421364
XM_624554.4	552176	-	2048	2.30261	4.21909	-0.873663	0.00065	0.00638377
XM_624751.4	552377	-	3048	20.4927	12.0942	0.760794	5e-05	0.000627385
XM_624820.4	552447	-	2406	121.068	52.7268	1.19921	5e-05	0.000627385
XM_624850.4	552477	-	4117	2.73278	1.5591	0.809653	0.0012	0.01092
XM_624863.4	552490	-	2094	10.1759	5.97773	0.767479	0.0034	0.0267578
XM_624876.4	552501	-	1917	34.0517	49.7579	-0.547198	0.00435	0.0329738
XM_624878.3	552503	-	1605	6.91066	12.6539	-0.872683	5e-05	0.000627385
XM_624899.3	552523	-	2457	1.34974	0.53455	1.33629	5e-05	0.000627385
XM_624907.4	552531	-	682	563.405	788.801	-0.485488	0.0003	0.00321156
XM_625269.4	551993	-	1893	4.91758	2.40498	1.03192	0.002	0.0169774

## Sheet: DE lncRNAs and DE mRNAs_Rel_Cag
DE lncRNAs and DE mRNAs in the oviposition recovery process
transcript_id	gene_id	gene_name	length	Rel_FPKM	Cag_FPKM	log2(foldchange)	pvalue	qvalue
NM_001011572.1	406078	-	2313	20.5635	29.3248	-0.512036	0.0015	0.0132566
NM_001011578.1	406088	-	5393	6.03961	33.1086	-2.45468	5e-05	0.000627385
NM_001011579.1	406090	-	1430	1.1662	0.26755	2.12394	0.00705	0.0496317
NM_001011599.1	406116	-	1943	0.43087	1.01681	-1.23873	0.00175	0.015129
NM_001011616.2	406143	-	680	6.57462	18.9791	-1.52943	5e-05	0.000627385
NM_001011636.1	409798	-	560	36.5392	14	1.38402	5e-05	0.000627385
NM_001040234.1	409677	-	1500	4.94782	10.521	-1.0884	5e-05	0.000627385
NM_001040259.1	411257	-	1743	39.1827	243.967	-2.6384	5e-05	0.000627385
NM_001098218.1	726755	-	774	6.14042	3.35046	0.87398	0.00625	0.0448285
NM_001112671.1	410795	-	3018	33.0558	14.8025	1.15907	0.00655	0.0466543
NM_001114198.1	552391	-	707	91.2692	130.261	-0.513201	0.00105	0.00971924
NM_001126243.1	410337	-	2324	10.3123	15.0645	-0.546779	0.00345	0.0271031
NM_001135909.1	100191002	-	320	3431.76	2464.37	0.477728	0.00065	0.00638377
NM_001142609.1	726134	-	1671	64.5575	93.5718	-0.535489	0.00015	0.00171726
NM_001144839.1	551077	-	490	21.7107	34.2161	-0.656272	0.0064	0.0457816
NM_001160048.1	408605	-	2744	379.116	279.447	0.440063	0.0021	0.0177095
NM_001160052.1	409587	-	2923	330	206.133	0.678895	5e-05	0.000627385
NM_001160064.1	408928	-	2822	1920.94	689.151	1.47892	5e-05	0.000627385
NM_001160072.1	410620	-	2237	53.593	10.0075	2.42096	5e-05	0.000627385
NM_001161831.1	727061	-	683	180.997	134.972	0.423306	0.00425	0.0323387
NM_001163714.1	411899	-	1542	9.5814	17.3737	-0.858596	5e-05	0.000627385
NM_001165906.1	412427	-	363	7.55562	2.65785	1.50729	0.00435	0.0329738
NM_001167836.1	409314	-	1455	14.6942	8.36888	0.812143	0.00145	0.0128782
NM_001170973.1	551975	-	1131	44.8995	69.8604	-0.637776	0.00035	0.00368417
NM_001170974.1	410066	-	1454	77.9583	105.455	-0.435855	0.00605	0.0436104
NM_001172378.1	408726	-	1199	60.5028	37.9194	0.674065	5e-05	0.000627385
NM_001177490.1	408270	-	1080	223.902	116.281	0.945248	5e-05	0.000627385
NM_001242387.1	409697	-	7404	99.7715	70.6309	0.498329	0.0001	0.00119145
NM_001242431.1	552665	-	1342	25.0478	17.5813	0.510642	0.0051	0.0377539
NM_001242514.1	724675	-	1794	83.1936	60.1437	0.468058	0.00115	0.0105259
NM_001242656.1	409148	-	1314	916.924	645.83	0.505648	0.00075	0.00723644
NM_001270813.1	724777	-	914	62.5974	30.8086	1.02277	5e-05	0.000627385
NM_001270820.1	727204	-	885	65.7842	28.9382	1.18477	5e-05	0.000627385
NM_001277299.1	410331	-	5619	27.5551	19.6071	0.490943	0.0008	0.00765733
NM_001278337.1	101664702	-	1854	3.99674	1.7942	1.15549	0.0002	0.00222634
TCONS_00011962	XLOC_004057	-	1802	5.05615	2.76088	0.872912	0.00135	0.0120939
TCONS_00015234	XLOC_005188	-	1718	19.5874	11.0558	0.825115	0.0043	0.0326437
TCONS_00017037	XLOC_005697	-	534	47.6598	29.0299	0.71523	0.00285	0.0230215
TCONS_00022514	XLOC_007625	-	3277	1.41568	2.6955	-0.929061	0.0026	0.0213034
TCONS_00025708	XLOC_008720	-	681	1.95018	0.215016	3.1811	0.00265	0.0216517
TCONS_00032354	XLOC_010780	-	2258	7.54422	3.28392	1.19995	5e-05	0.000627385
TCONS_00032482	XLOC_010781	-	1293	15.3574	7.42838	1.04781	5e-05	0.000627385
TCONS_00039472	XLOC_012992	-	6317	8.57782	4.97913	0.784717	0.0043	0.0326437
TCONS_00041894	XLOC_013769	-	4942	11.2296	5.04155	1.15537	5e-05	0.000627385
TCONS_00044486	XLOC_014655	-	1715	11.0167	3.68729	1.57906	5e-05	0.000627385
TCONS_00044520	XLOC_014660	-	1478	1.46922	0.275135	2.41684	5e-05	0.000627385
TCONS_00045276	XLOC_014904	-	2766	5.33444	9.67098	-0.858324	5e-05	0.000627385
TCONS_00052153	XLOC_016602	-	1950	0.232815	0.725989	-1.64077	0.0021	0.0177095
TCONS_00055983	XLOC_017736	-	436	27.0772	14.0653	0.944936	0.00085	0.00808185
TCONS_00058860	XLOC_018457	-	738	1.01488	7.59999	-2.90469	5e-05	0.000627385
TCONS_00063172	XLOC_019801	-	2456	1.47175	0.485028	1.60139	0.003	0.0240508
TCONS_00063173	XLOC_019801	-	2477	2.12469	0.613793	1.79142	0.00245	0.0202465
TCONS_00067871	XLOC_021327	-	1864	1.61326	0.789315	1.03131	0.0066	0.0469443
TCONS_00070323	XLOC_022087	-	3159	2.42973	4.41222	-0.860707	0.00015	0.00171726
TCONS_00073550	XLOC_023135	-	2330	0.212358	0.525166	-1.30628	0.0039	0.0300614
TCONS_00076946	XLOC_024066	-	1156	3.03745	1.23597	1.29721	0.00035	0.00368417
TCONS_00082452	XLOC_026957	-	1715	7.54729	20.0984	-1.41305	0.0011	0.0101285
TCONS_00087266	XLOC_034064	-	986	2.01654	0.727404	1.47105	0.00185	0.0158744
TCONS_00119397	XLOC_040436	-	1005	1.11959	2.36301	-1.07765	0.00295	0.0237238
TCONS_00145762	XLOC_028123	-	1865	4.69967	7.94783	-0.758002	0.0005	0.00505175
TCONS_00163034	XLOC_028456	-	2958	4.08826	2.22623	0.876883	0.00015	0.00171726
TCONS_00171798	XLOC_030218	-	1136	18.6077	9.70183	0.93957	5e-05	0.000627385
TCONS_00190649	XLOC_033436	-	15108	0.447252	1.10902	-1.31013	5e-05	0.000627385
TCONS_00206995	XLOC_059514	-	10796	0.392399	0.982501	-1.32414	5e-05	0.000627385
TCONS_00208246	XLOC_061328	-	717	3.47815	8.6497	-1.31433	0.00155	0.0136406
TCONS_00209732	XLOC_063657	-	6045	1.58487	4.92611	-1.63608	0.00275	0.0223437
TCONS_00209871	XLOC_063769	-	13017	0.580513	0.932857	-0.684328	0.0018	0.0155092
TCONS_00213594	XLOC_058116	-	1799	0.514684	1.36221	-1.40419	0.0063	0.0451529
TCONS_00242408	XLOC_058644	-	1215	5.53922	2.13372	1.37631	5e-05	0.000627385
TCONS_00255511	XLOC_063114	-	2732	0.186018	0.679584	-1.86921	0.0063	0.0451529
TCONS_00255730	XLOC_063655	-	3567	0.250217	0.528454	-1.0786	0.00625	0.0448285
TCONS_00257089	XLOC_067535	-	2063	1.31292	0.614803	1.09458	0.0032	0.0254182
TCONS_00276537	XLOC_072116	-	811	4.52492	1.29278	1.80742	5e-05	0.000627385
TCONS_00292623	XLOC_080132	-	1455	0.936568	2.13869	-1.19127	0.00075	0.00723644
TCONS_00301706	XLOC_070367	-	544	14.8353	5.46434	1.44092	0.0001	0.00119145
TCONS_00314048	XLOC_080977	-	1783	0.197641	0.533371	-1.43226	0.0052	0.0383638
TCONS_00378822	XLOC_106861	-	3818	5.01626	8.79456	-0.809999	0.00085	0.00808185
TCONS_00401505	XLOC_110621	-	721	90.2572	126.036	-0.481726	0.0018	0.0155092
TCONS_00418118	XLOC_107046	-	6371	0.504266	1.03278	-1.03427	0.00015	0.00171726
TCONS_00418451	XLOC_108103	-	9580	1.15532	1.85753	-0.685088	0.0006	0.00594174
TCONS_00424872	XLOC_120966	-	1678	0.372568	0.970609	-1.38139	0.00115	0.0105259
TCONS_00459577	XLOC_124310	-	3024	0.142335	0.468212	-1.71788	0.0001	0.00119145
TCONS_00488082	XLOC_124247	-	17807	8.91036	12.963	-0.540844	0.0031	0.0247363
TCONS_00509213	XLOC_132197	-	4486	34.6196	18.1006	0.935552	0.00425	0.0323387
TCONS_00526492	XLOC_137560	-	3895	4.12315	2.51151	0.715193	0.0009	0.00850416
TCONS_00531531	XLOC_146448	-	3028	0.898805	2.55566	-1.50762	0.00085	0.00808185
TCONS_00534650	XLOC_151643	-	532	566.42	409.179	0.469141	0.0007	0.006805
TCONS_00546512	XLOC_143356	-	747	0.449905	1.38058	-1.61758	0.006	0.0433426
TCONS_00581550	XLOC_140439	-	632	3.22226	0.96832	1.73452	0.0005	0.00505175
TCONS_00589262	XLOC_147619	-	1642	16.2328	23.3214	-0.522745	0.0019	0.0162503
TCONS_00595236	XLOC_149652	-	14219	0.907192	1.51472	-0.739571	0.0015	0.0132566
TCONS_00600160	XLOC_149652	-	6387	1.10025	2.03604	-0.887934	0.00455	0.0342807
TCONS_00605444	XLOC_162713	-	10117	3.95049	5.84514	-0.565207	0.0029	0.0233774
TCONS_00606513	XLOC_164289	-	3925	0.329445	0.637864	-0.953212	0.00545	0.0399254
TCONS_00612262	XLOC_164385	-	5374	1.15889	2.58602	-1.15799	0.00555	0.040572
TCONS_00617293	XLOC_165602	-	631	3.80015	0.488556	2.95946	0.00025	0.00272364
TCONS_00620980	XLOC_164015	-	3483	3.97737	6.20243	-0.641017	0.0051	0.0377539
TCONS_00627497	XLOC_160106	-	5153	0.82384	1.55548	-0.91692	0.00045	0.00460371
TCONS_00635911	XLOC_165608	-	326	2.65451	0	inf	5e-05	0.000627385
TCONS_00651349	XLOC_165610	-	370	0.610173	0	inf	0.00135	0.0120939
TCONS_00654824	XLOC_173988	-	3418	2.57841	4.33462	-0.749423	0.0004	0.00415277
TCONS_00670877	XLOC_175612	-	25239	0.880283	1.94212	-1.1416	5e-05	0.000627385
TCONS_00685932	XLOC_175806	-	3717	2.89621	4.96689	-0.778178	0.0021	0.0177095
TCONS_00695937	XLOC_170872	-	3552	1.33473	2.52309	-0.918639	0.00535	0.039323
TCONS_00701516	XLOC_175612	-	22781	0.644378	1.32691	-1.04209	0.0022	0.0184409
TCONS_00704588	XLOC_185895	-	926	33.2397	16.349	1.02371	0.00125	0.0113133
TCONS_00704746	XLOC_186215	-	202	493.441	229.353	1.10531	0.0046	0.0345967
TCONS_00708735	XLOC_192432	-	618	3.12066	0.768298	2.02211	0.0059	0.0427402
TCONS_00709518	XLOC_193333	-	8479	0.523372	3.08828	-2.5609	5e-05	0.000627385
TCONS_00709526	XLOC_193341	-	1128	1.38975	12.2882	-3.14437	0.00215	0.0180806
TCONS_00744245	XLOC_187361	-	5836	2.38925	1.26812	0.913861	5e-05	0.000627385
TCONS_00754371	XLOC_190534	-	3454	4.84439	7.85191	-0.696729	0.00015	0.00171726
TCONS_00759748	XLOC_192655	-	7090	0.878102	0.358159	1.29379	0.0013	0.011703
TCONS_00786787	XLOC_203483	-	973	4.28149	0.570829	2.90698	0.0045	0.0339727
TCONS_00793460	XLOC_202814	-	2862	6.28722	9.87486	-0.651338	0.00435	0.0329738
TCONS_00800730	XLOC_204602	-	2233	10.8653	17.9125	-0.721239	5e-05	0.000627385
TCONS_00815217	XLOC_214540	-	3918	7.29093	11.2753	-0.628989	0.0002	0.00222634
TCONS_00822198	XLOC_203483	-	2708	3.04023	0.860793	1.82044	5e-05	0.000627385
TCONS_00834042	XLOC_201596	-	4178	4.63427	2.62401	0.820568	0.00485	0.0361888
TCONS_00837086	XLOC_210441	-	14712	6.79535	10.5728	-0.637731	5e-05	0.000627385
TCONS_00837187	XLOC_210725	-	798	2.64826	1.10053	1.26685	0.0026	0.0213034
TCONS_00840054	XLOC_201520	-	7599	2.15647	3.40904	-0.660695	0.0002	0.00222634
TCONS_00857318	XLOC_230662	-	13105	1.83013	3.44844	-0.914	0.0011	0.0101285
TCONS_00874814	XLOC_225408	-	2403	14.1971	6.64048	1.09624	5e-05	0.000627385
TCONS_00899791	XLOC_241086	-	3416	0.463268	0.93979	-1.02049	0.00215	0.0180806
TCONS_00910115	XLOC_238068	-	1245	0.363412	1.59749	-2.13613	0.0003	0.00321156
TCONS_00911682	XLOC_241102	-	5285	1.17723	3.16675	-1.42761	0.0026	0.0213034
TCONS_00922416	XLOC_234811	-	1314	1.45764	0.402064	1.85814	0.00015	0.00171726
TCONS_00931827	XLOC_241094	-	2705	1.0069	1.81253	-0.848085	0.00295	0.0237238
TCONS_00937693	XLOC_236299	-	1456	27.8123	38.0046	-0.450448	0.0049	0.0365022
TCONS_00949203	XLOC_246707	-	3557	2.91122	5.45304	-0.90544	5e-05	0.000627385
TCONS_00953029	XLOC_252883	-	4975	3.75959	5.78065	-0.620657	0.00065	0.00638377
TCONS_00956088	XLOC_247095	-	1931	0.307796	1.80652	-2.55317	5e-05	0.000627385
TCONS_00959499	XLOC_253292	-	5235	0.237928	1.24112	-2.38305	5e-05	0.000627385
TCONS_00973017	XLOC_251050	-	3220	0.308363	0.643959	-1.06234	0.0038	0.0294235
XM_001119826.3	724142	-	561	978.198	656.793	0.574687	5e-05	0.000627385
XM_001119858.3	724126	-	1101	15.2276	8.34208	0.868211	5e-05	0.000627385
XM_001119884.3	724274	-	1028	89.4703	43.0257	1.05621	5e-05	0.000627385
XM_001119900.3	724144	-	721	56.6443	33.5353	0.756252	0.0001	0.00119145
XM_001119931.3	724178	-	5064	6.15951	9.34299	-0.601069	0.0003	0.00321156
XM_001119993.3	724225	-	1913	4.64116	1.49525	1.6341	5e-05	0.000627385
XM_001120006.3	724367	-	966	50.2209	14.4478	1.79744	5e-05	0.000627385
XM_001120089.3	724283	-	3491	7.79603	4.95488	0.65389	0.0011	0.0101285
XM_001120136.3	724899	-	1786	0.414394	1.01257	-1.28895	0.002	0.0169774
XM_001120140.3	725038	-	997	363.553	536.918	-0.562534	0.0001	0.00119145
XM_001120194.3	724488	-	872	40.0027	5.27131	2.92386	5e-05	0.000627385
XM_001120224.3	724390	-	2225	4.12502	1.98334	1.05647	5e-05	0.000627385
XM_001120232.3	724398	-	1266	24.7425	13.287	0.896974	5e-05	0.000627385
XM_001120364.3	725884	-	593	1457.66	1081.17	0.431066	0.00185	0.0158744
XM_001120370.3	724498	-	2812	29.4504	39.2551	-0.414589	0.0045	0.0339727
XM_001120478.3	725813	-	1979	8.65072	13.3234	-0.623074	0.0015	0.0132566
XM_001120636.3	724744	-	591	276.246	203.944	0.437783	0.0021	0.0177095
XM_001120678.3	724779	-	4557	52.6139	34.854	0.59412	5e-05	0.000627385
XM_001120695.3	726118	-	423	542.889	390.571	0.47507	0.00095	0.00890592
XM_001120698.3	724796	-	2087	27.205	11.8753	1.19591	5e-05	0.000627385
XM_001120726.3	724825	-	1423	9.90924	6.4228	0.625572	0.00485	0.0361888
XM_001120728.3	724827	-	659	66.6604	47.7184	0.482285	0.00545	0.0399254
XM_001120790.3	724890	-	3558	15.1731	10.1816	0.575554	0.0052	0.0383638
XM_001120814.3	724914	-	2656	5.29017	8.62477	-0.705173	0.00035	0.00368417
XM_001120917.3	725015	-	3346	35.2126	52.4431	-0.574663	5e-05	0.000627385
XM_001120991.3	725106	-	2968	13.1119	28.2925	-1.10954	0.00325	0.0257619
XM_001121117.3	725245	-	3390	22.6639	30.9968	-0.451722	0.0012	0.01092
XM_001121159.3	725291	-	602	50.0918	33.5092	0.58002	0.003	0.0240508
XM_001121184.3	725324	-	3497	28.7649	20.4936	0.489141	0.0035	0.0274366
XM_001121271.3	725420	-	2570	1.31578	3.06811	-1.22144	5e-05	0.000627385
XM_001121305.3	725462	-	2246	86.9652	54.8407	0.665191	0.00025	0.00272364
XM_001121323.3	725480	-	2360	89.2545	52.8134	0.757021	5e-05	0.000627385
XM_001121473.3	725651	-	4363	6.83809	13.9483	-1.02842	5e-05	0.000627385
XM_001121591.3	725784	-	1730	138.549	201.746	-0.542146	0.0006	0.00594174
XM_001121679.3	725885	-	3680	7.11782	9.74929	-0.453861	0.00675	0.0478144
XM_001121814.3	726040	-	2711	68.2669	104.908	-0.619873	5e-05	0.000627385
XM_001121838.3	726068	-	5941	12.5773	21.8836	-0.799027	5e-05	0.000627385
XM_001121969.3	726213	-	1436	12.6935	19.1619	-0.59415	0.00145	0.0128782
XM_001122057.3	726309	-	2883	302.045	134.923	1.16262	5e-05	0.000627385
XM_001122155.3	726418	-	2375	3.28552	8.19147	-1.318	5e-05	0.000627385
XM_001122161.3	726424	-	1669	76.5922	48.2476	0.666739	5e-05	0.000627385
XM_001122210.3	726478	-	3368	11.2096	7.27315	0.624086	0.00025	0.00272364
XM_001122218.3	726487	-	673	2929.66	4147.3	-0.501442	0.0009	0.00850416
XM_001122230.3	726498	-	461	80.3617	47.2099	0.76742	0.0002	0.00222634
XM_001122324.3	726597	-	4171	17.1675	22.4928	-0.389788	0.0062	0.0445376
XM_001122385.3	726664	-	1939	27.8677	38.5323	-0.467473	0.0037	0.0287608
XM_001122467.3	726747	-	521	264.371	181.306	0.544132	0.0004	0.00415277
XM_001122804.3	727091	-	2163	15.8215	22.218	-0.489838	0.00225	0.0188021
XM_001122876.3	727165	-	2195	0.212361	0.548912	-1.37005	0.00455	0.0342807
XM_001123067.3	727358	-	1724	0.184918	1.54667	-3.06421	5e-05	0.000627385
XM_001123152.3	727444	-	1594	4.30654	2.46567	0.804553	0.00275	0.0223437
XM_001123161.3	727453	-	579	0.455944	3.11553	-2.77255	0.0006	0.00594174
XM_001123195.3	727486	-	2954	51.2598	35.4882	0.530488	0.0054	0.0396288
XM_001123248.3	727539	-	1420	7.0335	4.50159	0.643807	0.0068	0.0481156
XM_001123258.3	727549	-	768	53.1072	74.6669	-0.491562	0.00355	0.0277701
XM_003249103.2	100576121	-	2255	15.7767	4.80408	1.71546	5e-05	0.000627385
XM_003249152.2	100577678	-	2407	16.1601	23.7444	-0.55515	0.0011	0.0101285
XM_003249174.2	410013	-	1554	10.9496	0.443257	4.62659	5e-05	0.000627385
XM_003249220.2	100576246	-	1909	1.06649	0.291353	1.87203	5e-05	0.000627385
XM_003249352.2	100577596	-	899	118.428	160.83	-0.441521	0.0028	0.0226888
XM_003249372.2	100578246	-	3532	46.4272	71.6114	-0.62522	5e-05	0.000627385
XM_003249377.2	100576095	-	972	4.98602	11.3025	-1.18068	5e-05	0.000627385
XM_003249381.2	100576406	-	1475	7.21041	3.87304	0.896616	0.0004	0.00415277
XM_003249685.2	726706	-	1860	55.0417	41.7578	0.398481	0.00545	0.0399254
XM_003249764.2	726295	-	663	732.328	566.518	0.370367	0.00595	0.0430473
XM_003249976.2	413020	-	2360	7.10021	16.0736	-1.17876	5e-05	0.000627385
XM_003249995.2	100576903	-	1539	10.1697	5.07987	1.00142	5e-05	0.000627385
XM_003250003.2	409208	-	4295	5.6567	3.18069	0.830619	5e-05	0.000627385
XM_003250093.2	100577725	-	542	0.871549	2.42832	-1.4783	0.00705	0.0496317
XM_003250151.2	727486	-	3251	35.1531	12.6559	1.47385	5e-05	0.000627385
XM_003250185.2	100577585	-	1532	0.329234	0.778958	-1.24243	0.00655	0.0466543
XM_003250218.2	100576791	-	2211	1318.14	1840.38	-0.481505	0.00415	0.0316952
XM_003250253.2	100578044	-	1786	106.351	49.7297	1.09665	5e-05	0.000627385
XM_003250369.2	100576116	-	3382	14.1569	21.2042	-0.582844	0.0001	0.00119145
XM_003250479.2	100577480	-	2145	40.494	69.631	-0.782024	5e-05	0.000627385
XM_003250690.2	100576284	-	2049	0.626547	0.171875	1.86606	0.0003	0.00321156
XM_003250709.2	100577226	-	1696	0.178893	0.897563	-2.32691	0.0052	0.0383638
XM_003250818.2	410258	-	2568	323.878	246.377	0.394582	0.0046	0.0345967
XM_003250903.2	413224	-	5328	7.87029	10.5493	-0.42266	0.00625	0.0448285
XM_003251058.2	100577717	-	2206	9.10956	4.91461	0.890304	5e-05	0.000627385
XM_003251062.2	100578085	-	1118	11.6457	21.5549	-0.888218	5e-05	0.000627385
XM_003251147.2	410867	-	9100	13.3282	19.9152	-0.579393	5e-05	0.000627385
XM_003251166.2	100578232	-	790	24.8503	13.3129	0.900436	5e-05	0.000627385
XM_003251269.2	100577635	-	9363	13.3913	20.7036	-0.628584	5e-05	0.000627385
XM_003251358.2	724633	-	592	374.17	508.703	-0.443128	0.00165	0.0143795
XM_003251375.2	100578466	-	2252	1.56487	3.01902	-0.948035	0.00055	0.00549577
XM_003251379.2	100576760	-	1550	12.2983	22.4969	-0.871273	0.0004	0.00415277
XM_003251438.2	100576473	-	414	8.51529	2.0411	2.06071	0.0002	0.00222634
XM_003251496.2	100576279	-	2111	0.682457	1.67284	-1.29349	0.0006	0.00594174
XM_003251519.2	100576179	-	6242	9.11249	5.64802	0.6901	5e-05	0.000627385
XM_003251539.2	724747	-	6523	2.50496	5.09506	-1.02431	0.00415	0.0316952
XM_003251578.2	725344	-	741	794.518	538.038	0.562372	5e-05	0.000627385
XM_003251744.2	100577847	-	3346	4.54738	8.00617	-0.816078	0.0001	0.00119145
XM_003251849.2	100578553	-	775	25.4362	40.5344	-0.672267	0.00055	0.00549577
XM_003251859.2	100576919	-	4608	41.2736	27.8307	0.568543	5e-05	0.000627385
XM_003251959.2	100578021	-	844	1.73999	24.8411	-3.83558	5e-05	0.000627385
XM_006557341.1	100576993	-	4243	14.6899	19.4753	-0.40682	0.00685	0.0484114
XM_006557561.1	552697	-	2813	11.2888	5.72473	0.979612	0.0025	0.020608
XM_006557683.1	726251	-	2004	4.66864	2.85879	0.707597	0.0043	0.0326437
XM_006557697.1	551329	-	2331	52.4272	38.9752	0.427758	0.0071	0.0499217
XM_006557705.1	412031	-	1783	122.57	200.118	-0.707247	0.00035	0.00368417
XM_006557750.1	726816	-	1552	113.553	80.8217	0.490551	0.00215	0.0180806
XM_006557825.1	408398	-	2015	10.7762	2.66671	2.01471	0.0009	0.00850416
XM_006557838.1	408402	-	3083	24.9593	18.51	0.431274	0.00505	0.0374503
XM_006557891.1	100578903	-	2982	3088.01	4937.98	-0.677245	5e-05	0.000627385
XM_006558098.1	413152	-	4361	33.7607	46.9167	-0.474758	0.0037	0.0287608
XM_006558193.1	551513	-	4783	34.6467	50.6209	-0.547015	0.00625	0.0448285
XM_006558194.1	551513	-	4663	14.8518	3.07151	2.27361	0.00675	0.0478144
XM_006558212.1	413002	-	1920	8.29212	2.7562	1.58906	5e-05	0.000627385
XM_006558346.1	724640	-	4350	29.6292	45.2855	-0.61203	5e-05	0.000627385
XM_006558616.1	411808	-	2068	51.9159	38.8196	0.419392	0.004	0.0307319
XM_006558659.1	412993	-	1982	28.0681	42.1356	-0.586109	0.0008	0.00765733
XM_006558668.1	411053	-	11477	0.914971	1.68623	-0.881999	0.00285	0.0230215
XM_006558674.1	727092	-	6764	0.644994	1.77703	-1.46211	5e-05	0.000627385
XM_006558823.1	726672	-	1097	3.5524	9.2121	-1.37473	5e-05	0.000627385
XM_006558872.1	726504	-	1488	19.6413	29.2842	-0.576228	0.00395	0.0303824
XM_006558971.1	724876	-	2405	1.30381	0.306603	2.08829	0.0013	0.011703
XM_006559139.1	724275	-	1430	7.67696	3.88086	0.984159	0.0007	0.006805
XM_006559210.1	724285	-	3058	4.35664	2.69466	0.693114	0.0015	0.0132566
XM_006559232.1	408372	-	2307	69.8816	46.0133	0.602863	0.00105	0.00971924
XM_006559419.1	725117	-	5483	8.94527	6.3986	0.483369	0.0048	0.0358743
XM_006559474.1	412439	-	2770	3.81726	8.5123	-1.15701	0.00545	0.0399254
XM_006559506.1	409165	-	2212	277.421	166.74	0.73448	5e-05	0.000627385
XM_006559586.1	551717	-	1034	1.291	0.497068	1.37697	0.00455	0.0342807
XM_006559799.1	413384	-	7181	3.9989	2.32743	0.780862	0.0003	0.00321156
XM_006559982.1	552479	-	3273	109.051	173.318	-0.668411	5e-05	0.000627385
XM_006560001.1	726768	-	2186	47.0722	31.3443	0.586672	5e-05	0.000627385
XM_006560014.1	725074	-	660	167.921	470.777	-1.48726	5e-05	0.000627385
XM_006560043.1	102654710	-	1228	14.5507	20.8052	-0.515853	0.00545	0.0399254
XM_006560090.1	408546	-	4680	19.5235	26.6012	-0.446285	0.00365	0.0284205
XM_006560199.1	413582	-	2301	4.61645	6.98292	-0.597047	0.0045	0.0339727
XM_006560206.1	412313	-	1960	12.3635	7.426	0.735427	0.00655	0.0466543
XM_006560245.1	102654315	-	984	25.173	36.1339	-0.521476	0.0034	0.0267578
XM_006560371.1	408429	-	6998	45.4506	78.3908	-0.786387	5e-05	0.000627385
XM_006560410.1	408421	-	2366	14.2807	27.6791	-0.954735	0.0005	0.00505175
XM_006560557.1	550671	-	1420	8.25225	4.73428	0.801644	0.00075	0.00723644
XM_006560573.1	552171	-	3061	50.878	70.101	-0.462391	0.00405	0.0310638
XM_006560712.1	412859	-	4250	22.3689	36.642	-0.712007	5e-05	0.000627385
XM_006560849.1	724631	-	539	732.197	528.461	0.470436	0.0004	0.00415277
XM_006560876.1	412883	-	5140	2.49085	4.32268	-0.79529	0.00015	0.00171726
XM_006560890.1	409335	-	1386	21.3685	12.2044	0.808086	0.0004	0.00415277
XM_006560902.1	410947	-	2526	6.03706	0.950392	2.66725	0.00285	0.0230215
XM_006560911.1	410944	-	6181	7.06956	1.97636	1.83877	5e-05	0.000627385
XM_006560925.1	413314	-	2170	23.9787	12.8302	0.902216	0.0019	0.0162503
XM_006560928.1	413314	-	1750	19.9112	7.8671	1.33967	0.00165	0.0143795
XM_006560967.1	551170	-	58059	1.33508	0.407626	1.71161	5e-05	0.000627385
XM_006560977.1	412775	-	13110	0.256865	0.57996	-1.17494	5e-05	0.000627385
XM_006560978.1	412774	-	4836	0.988108	0.408835	1.27315	0.0017	0.0147499
XM_006560994.1	102655899	-	3060	0.935114	1.77074	-0.921142	0.0009	0.00850416
XM_006561007.1	410626	-	3567	60.7677	81.0703	-0.41587	0.0032	0.0254182
XM_006561096.1	410893	-	4948	2.22452	3.59595	-0.692882	0.0006	0.00594174
XM_006561199.1	412878	-	9242	0.92751	2.18228	-1.2344	0.00675	0.0478144
XM_006561232.1	409868	-	2452	13.938	42.1717	-1.59725	5e-05	0.000627385
XM_006561234.1	409868	-	2520	32.232	83.7612	-1.37779	5e-05	0.000627385
XM_006561294.1	725800	-	12604	1.24262	3.37921	-1.4433	5e-05	0.000627385
XM_006561299.1	725964	-	5149	11.905	23.864	-1.00327	5e-05	0.000627385
XM_006561477.1	725870	-	5948	1.67226	3.18799	-0.930854	0.00345	0.0271031
XM_006561492.1	408961	-	10859	4.93647	24.5081	-2.31171	5e-05	0.000627385
XM_006561495.1	408618	-	4105	23.1267	30.6112	-0.404499	0.00475	0.0355475
XM_006561566.1	102654691	-	1197	461.713	337.733	0.451113	0.00105	0.00971924
XM_006561582.1	724718	-	4547	2.28235	4.59641	-1.00999	0.00605	0.0436104
XM_006561585.1	552414	-	7094	2.88024	1.25415	1.19948	5e-05	0.000627385
XM_006561685.1	727324	-	1547	1.74696	3.38395	-0.953858	0.00255	0.0209604
XM_006561690.1	725026	-	1493	21.5787	33.504	-0.634725	0.00035	0.00368417
XM_006561798.1	100578512	-	7004	0.291164	0.924779	-1.66728	5e-05	0.000627385
XM_006561800.1	726818	-	2218	1.85897	3.13052	-0.751901	0.00365	0.0284205
XM_006561837.1	724358	-	4949	2.17078	3.73774	-0.783951	0.00045	0.00460371
XM_006561886.1	724395	-	5221	23.8327	32.2929	-0.438276	0.00565	0.0412009
XM_006561909.1	100576626	-	1511	46.8415	63.5636	-0.440413	0.0056	0.0408847
XM_006561956.1	102656395	-	1036	0.345947	1.04764	-1.59852	0.0031	0.0247363
XM_006561960.1	726685	-	1636	9.94535	6.46047	0.622383	0.00285	0.0230215
XM_006562151.1	411071	-	2258	218.18	136.792	0.673533	5e-05	0.000627385
XM_006562152.1	724868	-	636	894.701	669.768	0.417744	0.0027	0.0220069
XM_006562174.1	551897	-	1613	2.45953	4.57484	-0.895336	0.00635	0.0454629
XM_006562189.1	413020	-	2271	3.31809	10.5394	-1.66738	0.00025	0.00272364
XM_006562253.1	551765	-	1998	15.9085	10.3039	0.626609	0.0005	0.00505175
XM_006562257.1	551869	-	6474	9.43389	5.83029	0.694284	0.00055	0.00549577
XM_006562338.1	411038	-	7230	6.53408	4.68205	0.480844	0.0028	0.0226888
XM_006562362.1	413749	-	2220	23.0479	34.763	-0.592917	0.00025	0.00272364
XM_006562385.1	102655272	-	824	72.915	39.0492	0.900924	5e-05	0.000627385
XM_006562565.1	408936	-	2403	121.725	67.6906	0.846594	0.0055	0.0402605
XM_006562611.1	724595	-	731	888.833	1234.66	-0.474125	0.0008	0.00765733
XM_006562720.1	412703	-	3344	88.4332	120.308	-0.444074	0.00345	0.0271031
XM_006562749.1	102656439	-	1929	1.40891	2.43822	-0.791251	0.00535	0.039323
XM_006562806.1	552501	-	1821	3.85302	12.3774	-1.68365	0.00665	0.0472359
XM_006562830.1	550998	-	1776	5.07616	1.47433	1.78368	0.00625	0.0448285
XM_006562838.1	726149	-	3454	0.859795	5.23003	-2.60475	5e-05	0.000627385
XM_006562951.1	100578563	-	4883	58.317	80.5264	-0.465545	0.00165	0.0143795
XM_006563034.1	724506	-	2139	28.7529	21.0555	0.449512	0.00415	0.0316952
XM_006563124.1	408551	-	5949	31.5341	17.953	0.812686	5e-05	0.000627385
XM_006563151.1	724469	-	8470	7.36088	5.39279	0.448845	0.0035	0.0274366
XM_006563198.1	410658	-	3854	0.574887	1.03622	-0.849982	0.00435	0.0329738
XM_006563222.1	409520	-	1340	23.3829	15.561	0.587521	0.00145	0.0128782
XM_006563308.1	552367	-	1995	37.0844	26.8897	0.463759	0.00445	0.03364
XM_006563323.1	408521	-	24736	6.0366	9.66538	-0.679091	5e-05	0.000627385
XM_006563352.1	100577777	-	1285	0.653032	1.9679	-1.59143	0.00125	0.0113133
XM_006563358.1	725202	-	636	16.7498	86.3759	-2.36648	0.00085	0.00808185
XM_006563359.1	725380	-	651	276.405	535.149	-0.953156	5e-05	0.000627385
XM_006563414.1	409666	-	3532	2.85458	7.45012	-1.38399	0.00485	0.0361888
XM_006563655.1	409682	-	2617	33.0264	23.7648	0.474797	0.0026	0.0213034
XM_006563747.1	551123	-	1049	17.5882	31.7157	-0.850594	0.0005	0.00505175
XM_006563865.1	413106	-	2665	30.3872	45.304	-0.576174	0.00575	0.0418311
XM_006563868.1	409722	-	14526	33.8563	22.1037	0.615138	5e-05	0.000627385
XM_006563918.1	412855	-	6446	5.50019	8.68853	-0.659629	0.00695	0.0490203
XM_006564000.1	100577224	-	6072	50.5738	71.6941	-0.503464	0.006	0.0433426
XM_006564033.1	409512	-	1209	5.00789	1.34442	1.89722	5e-05	0.000627385
XM_006564046.1	410465	-	3673	0.975784	1.719	-0.816935	0.0015	0.0132566
XM_006564049.1	410467	-	5685	0.283999	0.589985	-1.05479	0.00145	0.0128782
XM_006564064.1	551249	-	5444	4.58868	7.77682	-0.761102	5e-05	0.000627385
XM_006564080.1	100578434	-	7088	14.0748	5.41907	1.377	5e-05	0.000627385
XM_006564142.1	100577517	-	10161	8.21007	10.936	-0.413615	0.0064	0.0457816
XM_006564216.1	725147	-	459	731.675	536.419	0.447843	0.0008	0.00765733
XM_006564234.1	727293	-	1761	12.7602	7.7274	0.723593	0.00035	0.00368417
XM_006564235.1	102656247	-	1657	1.98694	0.84724	1.2297	0.00175	0.015129
XM_006564314.1	725936	-	29096	2.3956	3.54838	-0.56677	0.00165	0.0143795
XM_006564341.1	412865	-	5763	9.866	4.91162	1.00627	5e-05	0.000627385
XM_006564436.1	551560	-	1529	0.224949	0.62859	-1.48252	0.0048	0.0358743
XM_006564557.1	409367	-	988	58.7631	38.1937	0.621577	0.0002	0.00222634
XM_006564574.1	412080	-	2186	19.1759	10.5531	0.861625	0.0065	0.0463821
XM_006564700.1	552239	-	1913	18.7317	12.8052	0.548753	0.00175	0.015129
XM_006564701.1	100579019	-	673	2.0059	0.724365	1.46946	0.0057	0.04151
XM_006564754.1	409818	-	3479	33.0672	23.3808	0.500077	0.00105	0.00971924
XM_006564829.1	551766	-	1771	596.433	427.739	0.479628	0.00095	0.00890592
XM_006564861.1	410537	-	1983	27.766	37.1549	-0.420235	0.00575	0.0418311
XM_006564867.1	410535	-	3697	4.63052	8.59418	-0.892186	0.0022	0.0184409
XM_006564939.1	102656425	-	503	45.4196	28.6559	0.664483	0.0021	0.0177095
XM_006564945.1	724293	-	4548	25.3744	44.0462	-0.795647	5e-05	0.000627385
XM_006564955.1	725346	-	2890	2.95952	4.85281	-0.71346	0.0009	0.00850416
XM_006565000.1	551626	-	1718	185.603	267.788	-0.528867	0.0002	0.00222634
XM_006565280.1	100576961	-	851	3.06287	1.08095	1.50258	0.0052	0.0383638
XM_006565330.1	411166	-	7612	4.17416	5.77702	-0.468841	0.00535	0.039323
XM_006565427.1	408801	-	13592	11.5362	16.1438	-0.484817	0.001	0.00932037
XM_006565450.1	102656570	-	2432	5.38116	30.721	-2.51324	5e-05	0.000627385
XM_006565481.1	551180	-	3270	62.3743	108.531	-0.799081	5e-05	0.000627385
XM_006565483.1	102655002	-	4004	6.08637	11.6468	-0.93628	0.0004	0.00415277
XM_006565816.1	726997	-	5547	77.051	49.337	0.643144	5e-05	0.000627385
XM_006565841.1	100577827	-	1186	0.341789	1.00171	-1.55129	0.0029	0.0233774
XM_006565866.1	726803	-	1043	7.20163	11.9784	-0.734034	0.0016	0.0140101
XM_006565875.1	408699	-	3114	9.20457	5.93317	0.633548	0.0003	0.00321156
XM_006566035.1	410204	-	7965	14.8857	20.2384	-0.44317	0.0019	0.0162503
XM_006566111.1	725422	-	4990	7.58257	11.9944	-0.661601	0.0016	0.0140101
XM_006566236.1	726977	-	1266	10.4243	6.54114	0.672329	0.0033	0.0260853
XM_006566389.1	408361	-	1359	275.609	421.545	-0.613064	0.001	0.00932037
XM_006566390.1	408361	-	3103	56.6303	94.8439	-0.74398	0.00295	0.0237238
XM_006566392.1	552408	-	1399	23.5286	32.6907	-0.474466	0.00455	0.0342807
XM_006566402.1	410345	-	3059	23.2602	45.4001	-0.964831	0.0001	0.00119145
XM_006566769.1	725051	-	4687	2.50276	6.2487	-1.32003	5e-05	0.000627385
XM_006566877.1	409379	-	1998	37.864	26.1536	0.53382	0.0021	0.0177095
XM_006566942.1	102655436	-	5252	1.32865	0.730168	0.863666	0.00095	0.00890592
XM_006567204.1	102656934	-	2732	172.194	129.075	0.41582	0.0029	0.0233774
XM_006567292.1	409981	-	9465	0.22227	0.430758	-0.954564	0.0017	0.0147499
XM_006567295.1	724481	-	3126	40.1042	63.2375	-0.657028	0.00025	0.00272364
XM_006567317.1	552249	-	5403	16.2907	28.4746	-0.805625	5e-05	0.000627385
XM_006567319.1	102656217	-	2957	26.3923	17.8851	0.561356	0.00125	0.0113133
XM_006567613.1	725364	-	904	3.35504	6.65853	-0.988874	0.00155	0.0136406
XM_006567692.1	552106	-	584	461.82	292.636	0.65822	5e-05	0.000627385
XM_006567779.1	724743	-	2595	9.90708	18.3953	-0.892804	0.0056	0.0408847
XM_006567884.1	413763	-	1306	24.5346	13.1429	0.900542	0.001	0.00932037
XM_006568005.1	409557	-	1995	2091.99	2871.78	-0.457068	0.0052	0.0383638
XM_006568041.1	409714	-	4726	52.9194	81.119	-0.616243	5e-05	0.000627385
XM_006568268.1	725804	-	1647	6.10973	0.904206	2.75638	5e-05	0.000627385
XM_006568419.1	724652	-	5462	18.625	13.8753	0.424719	0.00355	0.0277701
XM_006568467.1	551124	-	2449	46.3681	33.9406	0.450119	0.0019	0.0162503
XM_006568501.1	412813	-	4433	21.6224	11.2271	0.945542	5e-05	0.000627385
XM_006568515.1	551263	-	1994	26.765	3.22286	3.05393	5e-05	0.000627385
XM_006568606.1	102656283	-	2671	3.01487	5.01413	-0.733905	0.001	0.00932037
XM_006568651.1	410795	-	5465	30.642	17.5807	0.801517	0.00665	0.0472359
XM_006568705.1	410803	-	4061	6.13688	11.2978	-0.880465	0.00025	0.00272364
XM_006568912.1	410819	-	7173	7.17735	3.81086	0.913337	0.00215	0.0180806
XM_006568972.1	726428	-	688	33.1651	16.2994	1.02485	0.0043	0.0326437
XM_006569187.1	408278	-	6436	14.8499	22.1356	-0.575912	0.00205	0.0173499
XM_006569404.1	100578269	-	1663	0.496758	3.56358	-2.84271	0.0001	0.00119145
XM_006569554.1	726944	-	2046	12.9575	22.0695	-0.768269	0.00125	0.0113133
XM_006569581.1	411847	-	1388	29.4726	18.2393	0.692326	0.0009	0.00850416
XM_006569620.1	726014	-	3463	170.936	225.394	-0.398988	0.00485	0.0361888
XM_006569771.1	724225	-	1505	9.3272	2.32011	2.00725	5e-05	0.000627385
XM_006569823.1	725485	-	8959	9.23111	12.5213	-0.439814	0.0023	0.01916
XM_006569857.1	410905	-	2439	47.7997	63.7552	-0.415542	0.0035	0.0274366
XM_006569908.1	102654542	-	1852	0.993332	2.04559	-1.04217	0.00105	0.00971924
XM_006570069.1	724719	-	834	39.5216	26.282	0.588563	0.0019	0.0162503
XM_006570110.1	410723	-	7396	2.57562	3.90008	-0.598585	0.00055	0.00549577
XM_006570208.1	102655090	-	658	104.77	70.2088	0.577502	0.00035	0.00368417
XM_006570234.1	552840	-	1127	16.899	11.4819	0.557575	0.00505	0.0374503
XM_006570263.1	726879	-	7577	2.75605	3.97482	-0.528288	0.00345	0.0271031
XM_006570264.1	726914	-	1120	45.2436	62.305	-0.461634	0.00325	0.0257619
XM_006570276.1	726294	-	3351	4.79797	12.8529	-1.42159	5e-05	0.000627385
XM_006570304.1	552804	-	4229	14.8652	21.5763	-0.537508	0.00165	0.0143795
XM_006570334.1	410270	-	7954	9.92353	15.5037	-0.643687	5e-05	0.000627385
XM_006570414.1	413583	-	5243	39.4662	52.1365	-0.401678	0.0037	0.0287608
XM_006570549.1	409708	-	1832	8.7838	4.03628	1.12182	0.0006	0.00594174
XM_006570565.1	408872	-	2569	20.3863	14.5377	0.487805	0.003	0.0240508
XM_006570577.1	551643	-	4771	37.7759	17.1792	1.1368	0.00405	0.0310638
XM_006570798.1	100577833	-	1158	1060.45	1443.12	-0.444511	0.0023	0.01916
XM_006570871.1	410136	-	3913	27.3256	37.7736	-0.467123	0.0041	0.0313827
XM_006570937.1	411670	-	5722	5.35469	3.04593	0.813922	0.0001	0.00119145
XM_006570964.1	412193	-	3200	13.959	10.1491	0.459849	0.005	0.037132
XM_006570980.1	551460	-	6652	2.62996	1.5311	0.780476	0.0067	0.0475268
XM_006571019.1	551529	-	2086	21.2837	9.40582	1.17813	0.00125	0.0113133
XM_006571091.1	551157	-	1216	262.681	169.323	0.633533	5e-05	0.000627385
XM_006571133.1	551356	-	24352	24.4057	35.3386	-0.534025	5e-05	0.000627385
XM_006571138.1	409792	-	6137	5.781	3.1282	0.885988	0.00105	0.00971924
XM_006571153.1	409792	-	4730	6.57565	3.34998	0.972982	0.00165	0.0143795
XM_006571166.1	410689	-	9842	5.55519	3.01904	0.879745	5e-05	0.000627385
XM_006571175.1	410689	-	4678	6.64294	3.1726	1.06616	0.00255	0.0209604
XM_006571198.1	410687	-	1429	2.67861	5.74768	-1.10149	0.00375	0.0290952
XM_006571223.1	551647	-	11181	6.3024	10.6585	-0.75803	0.006	0.0433426
XM_006571237.1	551357	-	2948	1.29405	2.28182	-0.818293	0.0025	0.020608
XM_006571272.1	411700	-	2523	420.791	235.963	0.834542	5e-05	0.000627385
XM_006571296.1	413575	-	5241	40.3317	15.5909	1.37121	5e-05	0.000627385
XM_006571319.1	102654353	-	3164	7.73946	12.2534	-0.662882	0.00315	0.025083
XM_006571434.1	408645	-	9620	1.76944	3.17305	-0.842578	0.0058	0.0421364
XM_006571435.1	725415	-	7060	2.20944	1.43569	0.62194	0.0027	0.0220069
XM_006571461.1	102655636	-	494	8.61343	2.57167	1.74388	5e-05	0.000627385
XM_006571495.1	100577142	-	3084	2.18138	0.85583	1.34985	0.0003	0.00321156
XM_006571573.1	100578953	-	3937	56.2369	81.1137	-0.528427	5e-05	0.000627385
XM_006571616.1	552168	-	3743	0.933626	0.328318	1.50775	5e-05	0.000627385
XM_006571687.1	551242	-	1761	65.8443	38.511	0.77379	5e-05	0.000627385
XM_006571744.1	102655882	-	681	2.05358	4.44519	-1.1141	0.0026	0.0213034
XM_006571970.1	552238	-	2235	2.06565	4.26471	-1.04585	0.00025	0.00272364
XM_006572000.1	412222	-	3363	4.45086	2.47372	0.847402	5e-05	0.000627385
XM_006572012.1	727393	-	884	108.448	74.5907	0.539936	0.00055	0.00549577
XM_006572103.1	726925	-	1352	0.178324	4.33858	-4.60465	5e-05	0.000627385
XM_006572198.1	727049	-	397	127.494	89.1042	0.516859	0.0064	0.0457816
XM_006572284.1	412663	-	10681	19.855	11.2816	0.815537	5e-05	0.000627385
XM_006572291.1	100576886	-	636	8.01767	3.57933	1.1635	0.00275	0.0223437
XM_006572293.1	551782	-	2210	4.97866	12.3478	-1.31043	5e-05	0.000627385
XM_006572419.1	552604	-	2057	2.7617	7.25421	-1.39326	5e-05	0.000627385
XM_006572553.1	102654422	-	332	16.496	5.13168	1.68461	0.00185	0.0158744
XM_006572587.1	725305	-	1823	0.617574	2.27329	-1.8801	5e-05	0.000627385
XM_006572689.1	100576778	-	471	3.7898	9.98287	-1.39733	0.0002	0.00222634
XM_006572710.1	727159	-	1065	126.506	185.61	-0.553072	0.0005	0.00505175
XM_391859.5	408308	-	830	1019.83	639.329	0.673696	5e-05	0.000627385
XM_391880.5	408328	-	2015	189.048	137.502	0.459302	0.00075	0.00723644
XM_392051.3	408508	-	3066	5.35368	2.5706	1.05843	5e-05	0.000627385
XM_392097.5	408552	-	7278	40.142	16.6256	1.2717	5e-05	0.000627385
XM_392145.5	408603	-	3038	0.48052	1.09164	-1.18382	0.0001	0.00119145
XM_392190.5	408650	-	1496	10.6404	23.3332	-1.13283	5e-05	0.000627385
XM_392231.5	408695	-	1172	0.412508	1.02553	-1.31388	0.0056	0.0408847
XM_392366.5	408835	-	5268	6.08266	3.91228	0.636693	0.0027	0.0220069
XM_392398.5	408868	-	1004	6.50262	3.4259	0.924536	0.002	0.0169774
XM_392407.5	408877	-	8743	26.4433	35.0342	-0.405862	0.00305	0.0243978
XM_392499.4	408970	-	4461	5.971	2.08011	1.52131	0.00675	0.0478144
XM_392513.5	408981	-	2570	11.2409	15.7159	-0.48346	0.0052	0.0383638
XM_392538.5	409009	-	801	87.3032	119.341	-0.450985	0.003	0.0240508
XM_392667.5	409141	-	1446	73.1266	28.6459	1.35207	5e-05	0.000627385
XM_392686.4	409162	-	1442	2.95199	7.86573	-1.41389	0.00025	0.00272364
XM_392698.5	409173	-	1863	1.68064	0.156406	3.42565	0.00035	0.00368417
XM_392726.5	409202	-	843	464.103	347.521	0.417346	0.0023	0.01916
XM_392752.5	409228	-	2340	18.8232	28.8977	-0.61844	0.0001	0.00119145
XM_392876.5	409361	-	1408	51.32	79.8997	-0.63867	5e-05	0.000627385
XM_392899.5	409384	-	2846	406.385	252.4	0.687134	5e-05	0.000627385
XM_393006.5	409499	-	1507	48.0242	29.9072	0.683267	0.00175	0.015129
XM_393105.5	409602	-	1492	2.57753	9.90124	-1.94162	5e-05	0.000627385
XM_393143.5	409645	-	997	42.2483	28.1425	0.586144	0.001	0.00932037
XM_393208.5	409709	-	1982	1.28035	0.467055	1.45488	0.0002	0.00222634
XM_393211.5	409712	-	1549	63.4056	88.091	-0.474384	0.00505	0.0374503
XM_393237.5	409740	-	1361	20.7173	8.97817	1.20634	0.00015	0.00171726
XM_393283.5	409789	-	2245	22.0024	11.1289	0.983347	5e-05	0.000627385
XM_393292.4	409800	-	2117	1.19762	3.0105	-1.32983	5e-05	0.000627385
XM_393342.5	409852	-	3431	41.008	26.4792	0.631046	5e-05	0.000627385
XM_393352.5	409862	-	1842	79.9615	54.2628	0.559342	5e-05	0.000627385
XM_393358.5	409868	-	3094	18.8286	36.1492	-0.941038	0.00425	0.0323387
XM_393381.5	409890	-	1714	752.092	549.385	0.453091	0.00175	0.015129
XM_393388.5	409897	-	4605	25.377	38.4281	-0.598641	0.0009	0.00850416
XM_393396.4	409905	-	2098	5.0776	2.75913	0.87993	0.00025	0.00272364
XM_393421.4	409930	-	611	431.389	279.489	0.626197	5e-05	0.000627385
XM_393487.5	409999	-	1293	15.3963	8.9438	0.783621	5e-05	0.000627385
XM_393575.5	410087	-	837	25.1347	8.43897	1.57454	5e-05	0.000627385
XM_393683.4	410200	-	1433	14.9115	9.72982	0.615937	0.00115	0.0105259
XM_393712.4	410229	-	5093	2.07882	4.16445	-1.00236	5e-05	0.000627385
XM_393715.5	410233	-	5831	20.3629	37.3908	-0.876739	0.0022	0.0184409
XM_393751.5	410270	-	6416	1.08937	3.48575	-1.67798	0.0027	0.0220069
XM_393759.3	410278	-	5071	3.83911	12.134	-1.66021	0.0046	0.0345967
XM_393763.5	410282	-	3366	7.31691	15.5263	-1.08541	0.0003	0.00321156
XM_393885.3	410405	-	5362	2.58861	1.45816	0.828036	0.0001	0.00119145
XM_393888.4	410408	-	7591	70.428	45.1713	0.640742	5e-05	0.000627385
XM_393963.4	410484	-	3715	2.18168	3.82366	-0.809514	0.00495	0.0368224
XM_393966.3	410487	-	5347	19.8062	13.9913	0.501427	0.00025	0.00272364
XM_394034.5	410555	-	3693	0.864363	1.64903	-0.931904	0.0004	0.00415277
XM_394115.5	410638	-	3841	0.904522	1.56001	-0.786323	0.0067	0.0475268
XM_394227.5	410751	-	1823	9.58061	6.19743	0.628449	0.00185	0.0158744
XM_394267.5	410791	-	3887	255.241	357.409	-0.485715	0.00055	0.00549577
XM_394354.5	410878	-	1251	1.587	0.74573	1.08958	0.0049	0.0365022
XM_394522.4	411049	-	5039	15.4178	21.3194	-0.467567	0.0011	0.0101285
XM_394753.5	411280	-	1490	17.7686	12.0107	0.565014	0.0025	0.020608
XM_394795.4	411320	-	995	12.7211	7.15718	0.829754	0.0007	0.006805
XM_394932.5	411457	-	3318	7.61691	13.1483	-0.787603	5e-05	0.000627385
XM_395083.5	411613	-	1328	11.6938	17.2216	-0.558479	0.0047	0.0352328
XM_395130.5	411662	-	1871	45.043	31.6828	0.507606	0.0006	0.00594174
XM_395145.5	411677	-	514	33.2912	21.2893	0.645012	0.00595	0.0430473
XM_395153.5	411685	-	2969	66.0498	91.0511	-0.463121	0.0009	0.00850416
XM_395263.5	411796	-	2031	38.3875	23.5777	0.703211	0.00035	0.00368417
XM_395464.5	411998	-	2417	15.0711	20.4299	-0.438895	0.0067	0.0475268
XM_395575.5	412109	-	2654	78.6882	53.2962	0.562115	0.00015	0.00171726
XM_395611.4	412147	-	4998	4.43905	2.92403	0.602293	0.003	0.0240508
XM_395614.4	412150	-	3183	279.988	198.087	0.499228	0.0003	0.00321156
XM_395659.5	412197	-	1200	61.0672	28.4783	1.10054	5e-05	0.000627385
XM_395671.4	412209	-	1799	4.46555	11.5354	-1.36916	5e-05	0.000627385
XM_395917.5	412460	-	2556	101.761	76.664	0.408558	0.00335	0.026426
XM_395948.5	412491	-	2027	37.3166	25.931	0.52514	0.0007	0.006805
XM_395959.5	412503	-	1027	12.4589	7.11252	0.808743	0.0004	0.00415277
XM_395995.5	412540	-	2820	13.4126	7.21323	0.89487	5e-05	0.000627385
XM_396123.5	412667	-	4201	6.20291	10.8203	-0.802724	5e-05	0.000627385
XM_396295.5	412843	-	3926	0.595914	1.4605	-1.29329	0.0006	0.00594174
XM_396375.5	412924	-	3144	31.7694	21.7495	0.546655	0.00035	0.00368417
XM_396376.5	412925	-	1788	1.6863	0.848687	0.990554	0.0028	0.0226888
XM_396475.5	413024	-	3794	4.15161	2.64276	0.651627	0.0026	0.0213034
XM_396494.5	413043	-	1938	0.868479	0.329052	1.40017	0.0017	0.0147499
XM_396520.5	413069	-	2852	15.4022	22.1332	-0.523073	0.00075	0.00723644
XM_396588.5	413137	-	805	514.302	363.036	0.502504	0.00045	0.00460371
XM_396640.5	413190	-	3432	7.39334	3.30594	1.16116	5e-05	0.000627385
XM_396778.4	413333	-	2977	12.266	16.7839	-0.452416	0.005	0.037132
XM_396815.4	413370	-	4219	3.18301	6.92659	-1.12175	5e-05	0.000627385
XM_396872.4	413428	-	9977	0.451877	0.753656	-0.737975	0.004	0.0307319
XM_396944.5	413500	-	3799	1.41918	0.716864	0.985289	0.0004	0.00415277
XM_396945.5	413501	-	2345	0.741514	0.311907	1.24936	0.00395	0.0303824
XM_397201.5	413762	-	1117	263.194	183.559	0.519881	5e-05	0.000627385
XM_397283.5	413844	-	2628	1.34362	0.481744	1.47979	5e-05	0.000627385
XM_397335.5	413896	-	1008	2.0613	4.26234	-1.04809	0.0014	0.0124897
XM_397478.5	414042	-	2595	107.131	78.311	0.452084	0.0007	0.006805
XM_397589.5	409796	-	910	257.349	197.528	0.381668	0.00535	0.039323
XM_623086.4	412397	-	2470	8.39868	13.401	-0.67411	0.00705	0.0496317
XM_623332.4	550937	-	1200	11.0022	18.0088	-0.710917	0.00185	0.0158744
XM_623369.4	550973	-	769	22.6065	60.4991	-1.42018	5e-05	0.000627385
XM_623438.3	551042	-	703	132.195	96.1643	0.459098	0.003	0.0240508
XM_623678.4	551282	-	1389	12.3122	8.22493	0.582009	0.00555	0.040572
XM_623767.4	551372	-	1365	1.26758	3.75275	-1.56587	5e-05	0.000627385
XM_623786.4	551391	-	1815	101.563	65.2915	0.637409	5e-05	0.000627385
XM_623826.4	551433	-	3752	10.0526	15.3807	-0.613548	0.0002	0.00222634
XM_623900.3	551506	-	4873	12.9925	9.36043	0.47303	0.00155	0.0136406
XM_623964.4	551572	-	1527	18.8449	35.9889	-0.93338	5e-05	0.000627385
XM_623993.4	551602	-	3218	190.243	145.159	0.390211	0.00385	0.0297521
XM_624050.4	551661	-	2242	17.5586	25.3802	-0.531526	0.00095	0.00890592
XM_624131.4	551744	-	1982	2.40547	0.970651	1.30929	5e-05	0.000627385
XM_624172.4	551787	-	3339	17.0109	24.4055	-0.520753	0.0006	0.00594174
XM_624178.4	551793	-	3842	118.343	173.93	-0.555532	5e-05	0.000627385
XM_624246.4	551861	-	499	525.549	357.451	0.556078	0.0002	0.00222634
XM_624253.4	551867	-	587	599.838	462.896	0.373884	0.0064	0.0457816
XM_624370.4	551987	-	1828	74.1508	51.5689	0.523959	0.001	0.00932037
XM_624412.4	552032	-	1269	17.3221	9.29777	0.897654	0.0028	0.0226888
XM_624429.4	552050	-	778	130.633	89.5636	0.544539	5e-05	0.000627385
XM_624554.4	552176	-	2048	4.68788	2.30261	1.02567	5e-05	0.000627385
XM_624691.4	552316	-	1959	19.5268	12.2427	0.673532	5e-05	0.000627385
XM_624698.4	552323	-	673	53.8498	33.9733	0.664542	0.00035	0.00368417
XM_624718.3	552342	-	3560	60.5592	90.0443	-0.572289	5e-05	0.000627385
XM_624751.4	552377	-	3048	12.5868	20.4927	-0.703203	5e-05	0.000627385
XM_624774.4	552401	-	2294	93.1132	63.6073	0.549793	5e-05	0.000627385
XM_624818.4	552445	-	1350	581.65	413.572	0.492014	0.00065	0.00638377
XM_624820.4	552447	-	2406	57.6516	121.068	-1.07038	5e-05	0.000627385
XM_624843.4	552470	-	1445	198.839	127.718	0.638639	5e-05	0.000627385
XM_624868.4	552494	-	592	761.201	558.833	0.44586	0.0041	0.0313827
XM_624879.3	552504	-	3142	1.61024	2.71754	-0.755031	0.0025	0.020608
XM_624899.3	552523	-	2457	0.690117	1.34974	-0.967769	0.0029	0.0233774
XM_624907.4	552531	-	682	1022.08	563.405	0.859259	5e-05	0.000627385
XM_624984.4	552610	-	519	372.994	254.49	0.551543	0.0001	0.00119145
XM_625002.4	552628	-	833	26.4833	16.1057	0.717511	0.00035	0.00368417
XM_625137.3	552761	-	1763	39.8414	22.3764	0.832289	5e-05	0.000627385
XM_625212.4	552836	-	2552	3.49602	5.50523	-0.655091	0.0071	0.0499217
XM_625251.4	551541	-	613	179.272	124.868	0.521745	0.00045	0.00460371
XM_625255.4	551596	-	2171	149.328	110.514	0.43425	0.00125	0.0113133
XM_625269.4	551993	-	1893	2.48652	4.91758	-0.98382	0.0021	0.0177095
XM_625289.4	552598	-	1940	6.9484	2.92208	1.24969	0.0024	0.0198832

## Sheet: lncRNA sequence information
LncRNA chromosomal location and sequence information
>ID-chromosomal-loacation	lncRNA transcript id	gene id	NCBI database lncRNA ID	Chromosome	Location	Sequence
>TCONS_00729407 database_lncRNA_id:"100049571" chrLG5 - 14082083-14083466_14083677-14083697	TCONS_00729407	XLOC_196947	database_lncRNA_id:"100049571"	chrLG5	- 14082083-14083466_14083677-14083697	CTTCAAAAAACATAACCTTAAAAGAGAATCAACGTGGGATTTTATGGTATATCTACTACATTGTGAGTACTACAAAGTTCTTTTGAAGGAGATATAGATCTAATTGGTTGATTATGATAACTACACATTCACAAAAATAAATATGAAATAAATGCCAAATATATAATATATGTTGATGAATAAAAGATACGAGTATTTAGTTTTGCTTGCGAGCAAAAGGCAAAATAGCTTTTTGCAATTTCAACGAATAGATGCAAATTTTAATAATAGAAGATGCTACCAATTAAATAAATTTAAAATTATTAATGGAGAACTTTAGAGAAACAATAAGATTTTATAAAATCCAAATGAAAATATTATCGCGAAACTAAATGGCATTCAAAAAAAATTATCAATGTG…
>TCONS_00305873 database_lncRNA_id:"100576080" chrLG11 + 2354137-2354365_2354817-2355075_2356901-2357134_2357640-2357763_2357824-2359317	TCONS_00305873	XLOC_071285	database_lncRNA_id:"100576080"	chrLG11	+ 2354137-2354365_2354817-2355075_2356901-2357134_2357640-2357763_2357824-2359317	GAAAGAGAGAAGTTACTTGAACGTGGTCTTGGTCGATTAAAAATTAGTCCGTTCACGGACTTTGATAAACTCGGATCGTATGTCACAGTCTGTGAAACGATATCTGCACATAGTGGAATACGTAAGGTCTATAAATAGGAGGAACGTGGGATTCGGATCTGAAGATTTGGAGAGACGTGTCTGAGCGCCCTCTCGTCGCGTTCGTGCGCTGCGCGAAAGACAGGAGATGCAAAGGCTTCACGCTTAAGAGGGCCTGTCGTCGATCTATAAGGACGGTATTTGACCACGATGCCACGTAAGCCACGACCGCGACCCCTGTCCTCGAGGATTTGCCGCGAAAACCCTTCTCGGTTTCGGAGGTGATCAGTCACCTCAGATCCACGGGGCAAACAAACTTAA…
>TCONS_00305874 database_lncRNA_id:"100576080" chrLG11 + 2354137-2354365_2354817-2355075_2357640-2357763_2357824-2358513_2359524-2360428_2360507-2360532	TCONS_00305874	XLOC_071285	database_lncRNA_id:"100576080"	chrLG11	+ 2354137-2354365_2354817-2355075_2357640-2357763_2357824-2358513_2359524-2360428_2360507-2360532	GAAAGAGAGAAGTTACTTGAACGTGGTCTTGGTCGATTAAAAATTAGTCCGTTCACGGACTTTGATAAACTCGGATCGTATGTCACAGTCTGTGAAACGATATCTGCACATAGTGGAATACGTAAGGTCTATAAATAGGAGGAACGTGGGATTCGGATCTGAAGATTTGGAGAGACGTGTCTGAGCGCCCTCTCGTCGCGTTCGTGCGCTGCGCGAAAGACAGGAGATGCAAAGGCTTCACGCTTAAGAGGGCCTGTCGTCGATCTATAAGGACGGTATTTGACCACGATGCCACGTAAGCCACGACCGCGACCCCTGTCCTCGAGGATTTGCCGCGAAAACCCTTCTCGGTTTCGGAGGTGATCAGTCACCTCAGATCCACGGGGCAAACAAACTTAA…
>TCONS_00093270 database_lncRNA_id:"100576084" chrLG1 - 11742267-11742982_11743077-11743224_11744545-11744996	TCONS_00093270	XLOC_043611	database_lncRNA_id:"100576084"	chrLG1	- 11742267-11742982_11743077-11743224_11744545-11744996	GATAATACTACCAATATATGTATCTAAATGCACTTCACAAAAGCATAAAGTTTCACGAAAACTTTAAATCGCGAATTATCCTTGTTCTGCAAATACACACTCACACAATATATAATAAAATGGTCCATTTTTATCATATTTTATCATAGTTTCGATAATATGAACAAGTTCCTCGAATATACTGAATTCTATCAAATTCGCGATTTTAGTTTTCTTAGTTTTTTCATAACCATGAATATTACTGTAGTTTGCATTATGGTTCGAGATTCTATCGAAACAAAGAACGAGATGGTCGAGTCGATTCGATCTGATTCGCGTTCGATTGAATTATTCGATGCACGTCTCGTGTGCAACATTTTTAATTTAAGTTCGACGGAATCGCGTTCTGTTTTTTTCTCT…
>TCONS_00175588 database_lncRNA_id:"100576102" chrLG1 - 10560101-10560645_10560758-10561088_10561310-10561386	TCONS_00175588	XLOC_043281	database_lncRNA_id:"100576102"	chrLG1	- 10560101-10560645_10560758-10561088_10561310-10561386	TATAGAACTATTTTTTGCATTGTATATTGAAGAAAATGGAACAGATAAGATTTTAAACAAAAGCAATTGAAATTCTGTATGTCTACCACATCATTGAGAAGGGGCGCAAAACTAGTTCGTCGTCGAATGACGTAGGAGCTCTCATTTTCTTGGCCACCTAGTATACACATCCGGTCGGCCGCCACTCTGCAACTTTCCTACTTCATTCATCGACATTCTGTGGCCTTTGAAGGTTGCACAGCAGAAAAGAGCGGGCACGGTCGCGCGCCACCGATCAGAGTCAGCCGGCGTGCCGACCAGTTTCAACATAATAATTCCTTCTCAGAAATACATCATAACTACCACTACATTCTGCAGCATCCCAAATATGAATCGTACTTACATATGAATCGAATATCT…
>TCONS_00208819 database_lncRNA_id:"100576103" chrLG10 + 12014608-12014662_12014789-12015018_12015081-12015982	TCONS_00208819	XLOC_062443	database_lncRNA_id:"100576103"	chrLG10	+ 12014608-12014662_12014789-12015018_12015081-12015982	CACGAGCGAAATATATAGCTACAATTTCGATCTTTTTTTTCCAACGAGAGAAATGAACTTGGTCGGAAGAACATCGAAACAAAAGGGATCAATCATTTGGCTTGTTCGATTTCGAGGCGAGAATTTTCTTCTTTGACAGTGGTATAAAGTGTCTCGTACGTTTGCGTCGATGCTTTGGAAATAATACAACGAAAAATTAATGCTGATCGTTGATCGATTACTGTCGAAAAAATTAGGTTATGTACGCGCATGTTCACGAATTAATATGTGTTATAATTTTAACAGATTTAATATCGAGCCTCAGGCATTGGTCAAATACAGAAGATATTAATCGCAATCTTGGACAATATTTGTTGTAATCGATGACAATATCGATGTAATCAAATCGAGTGGATAATT…
>TCONS_00901641 database_lncRNA_id:"100576105" chrLG8 - 13089443-13090459_13090568-13090814	TCONS_00901641	XLOC_244022	database_lncRNA_id:"100576105"	chrLG8	- 13089443-13090459_13090568-13090814	AATTTTCAATAAAATCTTAAAAAAATATCGCGATATTTATCTATAAGAAGAGAATTTGTACAATTGAATTTCCTCTTTACATTTTCCTCTTTTTACATTACAATAGCAATGATAAAATCATGAATATAATTGTTTCAATTGATAATCTTGTTGAGTATAATAATAATACTTTTCACAATTTTAAAAACATCCTAAAGCAAACACTCATTTGTTACCTATTTGGGTAACAAAAGGGCAAAAAAAAAATAGAACAACGTGGATGATATTCTCAATTAAGTAAAGAAAAAAATTCCGTCCAAACTTGTGAAAGAAACTATAATTATGAGTGATAATTATTATGAAAAATTTATATCTATATAATTCATAATTAAATAAGAGTCATAATGATTGTAATAACGT…
>TCONS_00457583 database_lncRNA_id:"100576122" chrLG14 - 3852907-3855684_3859338-3859776_3859956-3860025_3860116-3862726_3863206-3865222	TCONS_00457583	XLOC_118442	database_lncRNA_id:"100576122"	chrLG14	- 3852907-3855684_3859338-3859776_3859956-3860025_3860116-3862726_3863206-3865222	ATAAGATTTCATTGAACAGAAATAGAAAGAGTTGAGGAAAAGGATGAAGATTGGTATTATAAAATATTGTATTATAAAATTATATCATGAAATATTGGTATTGATATTATGTAACATGAAATATATTTAGAATAGAATGTAGATGTAATATTATAATTATCAATAGTGTAATATTATTATACAATATTTTCAGTAATAGATCTATTTTCGTAATCCTTCTTTATATTCTATTATAAATCTAGAAGAGGTTAGAAAAAAAAGGAAAAAAAAAAAAAATTACAAATTAATACATGCTCGATTAGAAATTATATTTCATAAAACTTTTACAGCTAATAAAATTTATTTACCATAAATTTAACTGTAAACCGGTGATCTTGTACAGATAACAGATCAATTTAT…
>TCONS_00197550 database_lncRNA_id:"100576139" chrLG1 + 6378655-6379769_6379873-6380210_6380754-6380926	TCONS_00197550	XLOC_028266	database_lncRNA_id:"100576139"	chrLG1	+ 6378655-6379769_6379873-6380210_6380754-6380926	GATTTATCCGGCAAATGCATTCTGCATACATCGAAACTATGTAATCGAGGCAATCGAAGACGTTCATCGAACCCGGAGGCATTGTCGCGCACGCGAATCGAAATACATATGTACTACTCGTATCCACAAATGAGTATATCTACGTGTGTACGTGAGAAGTGTGCATCAACACAACGCTGCCAAAACACAACTTTCCCCTAGTTTCAGATCGCACTAGAATAGAAAAAGAAGAGATTTCGAGTGGCGGCGGCCGCGCGTTTTTTTGGTCGAGGAACGTGACACGTTCGTGCGTGCTCGTGCGTATTCGTACTGCGACTCACCGGGTAGTAGGGAGAGGACTCGTCGTGTAGGACCACCCAGCGACGAGCGTCGCGTCGGCCCCCAAAAGACAAGCACGTG…
>TCONS_00226913 database_lncRNA_id:"100576168" chrLG10 + 11983845-11984331_11984440-11985035_11985131-11986571	TCONS_00226913	XLOC_062416	database_lncRNA_id:"100576168"	chrLG10	+ 11983845-11984331_11984440-11985035_11985131-11986571	TGTTTCAAAAGTTGGATGACAACGTTTCAAAGTTGGTGATAAGTTGTTATTGTTCACCAGTCGCCGCGCCACTATCGTTTTCATTGTCCTGTTTACGGATCGTAACTCTCTATTGATCATGTCGATATTCCGTTTTAGAGGACAGCTAGCTACATTCAAATAAACGAGGATTAGTAAATTTAGCATTTGATACTTCACGGTTTAACCTTGCCTCGATTGATATTGAAGAAAATCGGTAAAATATATTGGTCGATCGAAAAGTAATTTCATTTTTTCACACGAGTGTCGCTAATTGAACGTTTATCCAGCTAACTTCATTCTAAACTGTATTGTTACATATTTTAACACTTCGCATCTTCTGATTTATTTATAAGAAAAATTCGTTTGATTCTGTGTGTG…
>TCONS_00814664 database_lncRNA_id:"100576183" chrLG6 - 8132617-8132770_8132927-8133501_8133935-8134248_8135439-8135644	TCONS_00814664	XLOC_212294	database_lncRNA_id:"100576183"	chrLG6	- 8132617-8132770_8132927-8133501_8133935-8134248_8135439-8135644	CTTCAAGATAAAAGATTCGTTGGCGAAACGTTTCTCAGCTAGAAGAAACGAGGAGAAGAAAGAAGAAAGAAGAAAGAAAAATGAAAGGTGGCATCTCGACGGTGCGGGTATCCAGGCGAGGTCGACCCTTATCGTTTCGCGAATGGCCACGTGATCGAATTTAGCCGAGATTGAAGCTGACCGTGCACGGTCGTACAGGACTTCCGGTTTTTCACGGAAGACCCGGAGTAGTGTGCCAAATCCGCACGACGTGCAGCAACTTCGCCCGGTACCTGCTACCTGATATGATTTTCGGCATGTCTTCGCTCAGCCCCGGGAAAATGGAATTTCCTCTCGTCTCATTTTCGTATGCGTACTCTTCTATGTAGTACGTGTGTTCGCAATCCTGACGAACGATAG…
>TCONS_00837774 database_lncRNA_id:"100576183" chrLG6 - 8130652-8131872_8132665-8132770_8132927-8133501_8133935-8134248_8135439-8135683_8135796-8135947_8137196-8137550_8137663-8137728	TCONS_00837774	XLOC_212294	database_lncRNA_id:"100576183"	chrLG6	- 8130652-8131872_8132665-8132770_8132927-8133501_8133935-8134248_8135439-8135683_8135796-8135947_8137196-8137550_8137663-8137728	CCCGAATGAATAGCGTGGTGGATATCATGGATAAATGACTCGAGAGTCTGGGTCAGGACTAAAGAGGTACGTGATAAAACTTTATTTATTAATGTTGCGCCATTGTATCATATTATTAGATCACGTAATCAGTGATATATTTTTGAGGTTAGAGAATTTCAAATATTTTAAAGTAAACGATCTCGTATGTTTGAATAAAAAATTTTATTTAATAATCCATATTTGTCTGTCATATGAGATCATTCAACATTAAATGATGGAGCAAAAAGACTTTGTCATGGGAGATGCACGAAGTGTTCATTTGAATCGATACAACATTGCAATTCTTAAGCTATGGAAGTTGTAGTAGCGACATGATGGATGTCCCATATATTATGCACATGGTGTAAGAGCTATCTT…
>TCONS_00751475 database_lncRNA_id:"100576207" chrLG5 - 13520592-13521354_13521506-13521690_13521795-13522056_13522516-13522615	TCONS_00751475	XLOC_196748	database_lncRNA_id:"100576207"	chrLG5	- 13520592-13521354_13521506-13521690_13521795-13522056_13522516-13522615	GTACGAATCAATATATGATATATCATTGACATAACCTAAAACTTTTGCATTATCGAGAGAGGAAAAGGAAAAAAATATCCTTAGTAGATATGATTTTTTCTATAAAGATATATGAATGTATATATTCGAATGGTATGAAATGGAAGAAGGATACGTAAAAGAATAAATTTAGTGTATATTTCAGTTAACAATAAAACAAAAGAGTATTGATAGTTTATAATGTGTTAGAACGAGAAATATACAACGAAAGAAAAATAGAAAAATATATATATTTGTACACGAATGTACCAATGACATAACCTAAAATTTTTGAATTGTTGAAAGAGGAAAAGCGAAAATATCTATACGGATATGATTTCTCTAGATAAATCGAGGACAAGGAGAAAGGGGGAAATAAGG…
>TCONS_00857043 database_lncRNA_id:"100576240" chrLG7 - 11479865-11479997_11481250-11481328_11482087-11482116	TCONS_00857043	XLOC_230312	database_lncRNA_id:"100576240"	chrLG7	- 11479865-11479997_11481250-11481328_11482087-11482116	GGCATCGGTACGATTCACATCTATAACGAGAAGAAAGAAAGAGAGAGAGAAGAAAAGGAAACGTTATCGACGAAATGAATCGACCGTTCGAAGAGCAGAATTTTTCCAGGAAGCCGATGGCGCGAGCTTAAGAAACTTGGGAGGAAGCAAAGTTAAGTCTGACGATAATTTTCCTTCCTAAATCGGAATGCTAATGAGCAAACCTATTAATAGTTGATAGAACGGAAGAAGAAACCACCAAT
>TCONS_00121292 database_lncRNA_id:"100576257" chrLG1 - 17189942-17190830_17190979-17191165_17191273-17191405_17191508-17192565	TCONS_00121292	XLOC_045641	database_lncRNA_id:"100576257"	chrLG1	- 17189942-17190830_17190979-17191165_17191273-17191405_17191508-17192565	GAAAATTCGCGAGGAAGAGGGATCGCAAAATCAGCAGCAAGACGCCGAGAAAGAGAAGGATTGCGAAAGGACAGCCGAAGCGGCGGATTCGTGAACATCAAACGAATTAAATCTCCGCGGCGAGTCGACCGCAGAAACTAATATCTCGGCGAGCTCTCTCGTTTCTTCCGTTCCTCGTCACTTCTACGTAGCCGTTTCAGCCTCCGCTTCTCTTTCCTCGACCACCGCGCCGCCCGCCATCGTATTTCTGGATTCCGCTTCGAAAGAGATTCGTGCCTGCGCCTGCGAGACAAAGTGGACGATGACAAAATTATCGTCCACTTTTCCCGGTTGAAAACGCGTTTCTCAAAAAGAAAGAAAACCGGGGCCTGTAAACGTTTCGTTCGAACGATGAGAGCA…
>TCONS_00131786 database_lncRNA_id:"100576257" chrLG1 - 17189978-17190830_17191034-17191165_17191273-17191432_17191508-17191893	TCONS_00131786	XLOC_045641	database_lncRNA_id:"100576257"	chrLG1	- 17189978-17190830_17191034-17191165_17191273-17191432_17191508-17191893	GGGAAGAGTGTTCTCGAACGAAGAGAAAAATGGTGTGGAGAAGATTGTAAGATAAGAAAAACGGGCTCGATCATTGAAGGCATTAAAACGGTGGATCTGTATAGTTTACGGCAATGTAATAACACTTTCGGTAACCGCTAAACAGTTTGCTATCCGCGGTAATTAAGTCGTTTCCGGGCATGGTTTAGAAAAGTGGTTGAACGTGTCTATTTCACTGGAAGGAAAAACAAGCGTCGATTCAACCGAAAAAATCCGAACGAGGTGCAAGTTTGCGCGTAAATCCGCCATCTCCTTCCGTACTTGAGAGAAACCGTTACGAAAGTGGGTAATAGGCGTTGTAATAGATATTATCTTGCTTGATAGGTGTCGATATCGTGGCGGCGAAAGATCGAAATCATG…
>TCONS_00669461 database_lncRNA_id:"100576283" chrLG4 + 6174469-6174734_6175504-6179647	TCONS_00669461	XLOC_171871	database_lncRNA_id:"100576283"	chrLG4	+ 6174469-6174734_6175504-6179647	TATATTATCAAAGTAAATACAGAACGTTTAAATATGTAAATAAATGTGGTAGCTCGTTTCGTTTACTTTTAGTCCAACGCAGAATGTATTCTTCCTTTGTCGCAGAAACACGTGATACGATGACTCACTGATATCCATTCCTATTCCTTCATTCAGTAGAGTGATTAGCTCAATTCAGAGAGGATGGAAAGTATTTTGCTGTGTCGAGTTAAGCAATTTTTACTGTGCCGATCGTCCCGTGAGGTTTTCTTCTTCTATTTATCAAGATCTACTTTTTCGAGAGATATTGGAACACCGACTTTCCACCGTACTGGGGCACAGAGATATCGAGATCGACGATTCTTGTTCGTTTTGCAAGAAATCTAGTATAATAGAGGTACACCGGTGCAATGTCTTGTT…
>TCONS_00706506 database_lncRNA_id:"100576287" chrLG5 + 9306167-9306557_9307182-9307854_9308213-9308580	TCONS_00706506	XLOC_188786	database_lncRNA_id:"100576287"	chrLG5	+ 9306167-9306557_9307182-9307854_9308213-9308580	ACTGTATACATGTGCCGGAGCTACGCATGTCGACATCATATATAATTTATATTCGTTTGATATAATTTAAAAATGTGCACAAATATCAAATTTGAAATACATCCTACGTTATATTCGCGAGTGTTAAAATATATATTATTTATTTGTTTTATTTGTGAATGTTTTAAGTACGTTTATTTGCGCAGTGAAATAGTAGCAGTTTCGCGCGTTTTTTTGCAATTGTTTGTAGTTACACGTTTATTTACGAATATTCAGTCCACACATTTCTACGTAAATTATTCGTATATAATTCGTTTATTATATATATAATCATTTTATTTGTAAATGTTGATACGTTTCATCATTGGACAATCAATCAAGTGGACGATATAATATTCTATAAAGTTCTTCAAGGAAAGA…
>TCONS_00301778 database_lncRNA_id:"100576299" chrLG11 + 1212273-1212631_1213593-1214808_1214873-1215076_1216043-1216368_1216451-1217264	TCONS_00301778	XLOC_070582	database_lncRNA_id:"100576299"	chrLG11	+ 1212273-1212631_1213593-1214808_1214873-1215076_1216043-1216368_1216451-1217264	AACGCGCGAAAGTAAACTCGAGCGCGGCAATGTACACAGCGAATTATCGCGGATTCGATCCCAGAATTTCGAATCATGGCCGATCGTGGCTCAATTGGAACGATTAATTTCGCCCCTCGCCGTATAAACATAACAAATGGCCGGTCGTTGATAAATTCGCGGCGATAGCACGCGTTCCATATGGCTTGCCGCCATCCTTTCCGTCCGACCAATTGCCGGTATCGATCACTGCACGTGGGAGAGGCCGCGTCTGTCCGACCAGAAACGCTCGTTACTACTGTTTATCGACTGGCTAATCACTCGACTCTTACCAAGCGTGTTGTGCCAGAATGCCCGTTGTGAAAAAGTAACTAGAACTAGGAGGAGCTATTGATATTGAAACGCGTCTTCGACGCGGCA…
>TCONS_00244176 database_lncRNA_id:"100576301" chrLG10 - 2304803-2312826_2320739-2320794	TCONS_00244176	XLOC_063824	database_lncRNA_id:"100576301"	chrLG10	- 2304803-2312826_2320739-2320794	ATCGTTTTCAATTTAACAAATTGGATATCATTTAATATAGATATAATTTAAAAAAGAAACACTACTACAGTGGGAAAATCTCGAGCCACAAATCATATGATTTTTTTCCTTCTGGTACAGCAGCTAGGGTAGAGAAAAATGAATTCAACGATGCTTAACGATTTACTGTTGCGGTCACCGACTTTCAATATATTTCAATGATGTCGTGCTTGGAATTCTTGTCTATTTTAAAATAGACTTTCTCAAATAGAGTTTCTCATTTTATACTCTATCCACTTTTATTCTTAAGAGCAAAATTTTATCGTTACCTTATCTTCGAATCGCGTAGGAACCAATAAATTTTTATTCCCTCCCTATACTTTATTTAATTAAGAATCTATCGCTCATTGGGAGAAAGAA…
>TCONS_00341810 database_lncRNA_id:"100576302" chrLG12 - 3827742-3828452_3829925-3830066_3831448-3832341	TCONS_00341810	XLOC_092034	database_lncRNA_id:"100576302"	chrLG12	- 3827742-3828452_3829925-3830066_3831448-3832341	TGACAGAAAAACTATGAAAATATAGTTCCATCACATCATGTGTCGTAATTAACCGATGAATTATAACAAGTAGGAACGCGTGACGCGTGAAATATAATAAGGTAGGGATAAGCAGCAAACGAGGCGTTGAGCGTTCAAATTCATACCAGCAGGAAGACCGAGTAATTAGGTGACCTGACTCTCAAATGTCGATGTCATTATCCGTGCGAATCACAATACAAAAGAAACAGAACGAAGATACGCTCACTCATATTTATAATTAATTCTCGCCCTTCTTTTTTGTTTTTTTTTTCTTTTTTTTCTCTTCTCTTTTCTTCTTCCTTTTTTTTTTTCTATGTTTGGTGGCGCAGCGTAAATTGAGTCGGCGAATTAACTAGACTGTCGTGTAATTAAAGCAAT…
>TCONS_00922215 database_lncRNA_id:"100576319" chrLG8 + 2510481-2511532_2511791-2512939_2513063-2513259_2513652-2513808	TCONS_00922215	XLOC_234105	database_lncRNA_id:"100576319"	chrLG8	+ 2510481-2511532_2511791-2512939_2513063-2513259_2513652-2513808	GAAGAATTTTTAGAAAAGTGTTTTTTTATGTAAATATATTTTAATATATTTTCTTTTCTCTTTTTCTCTTCATGATGAAATGACATTACTAAAATTTCTTCAATGAACCTTCCAAGAAGGATCCTTCTTTATCACAAACTTGGTGAGGACCCTTCAGAACCTTCAGATTTAAAAAGAATATGGTCTTAATGAATGGTCTTACCATTCAAACTTTCATTTCATACTTTATAAAAGTAAGTTTTCAATTTTTGATTAAGTAATGATTAAATAAATAAATAGAGTAATTTTAGAATCTAATTTAAATTTCATATTTTTGCTATTAAAAAGAAAACAGCATGATAATAGTTCACATTGGAAGGATTAACTAACATCAACCTAACGTTCTTTTTCGAAAATAAC…
>TCONS_00925885 database_lncRNA_id:"100576319" chrLG8 + 2504545-2504628_2504769-2505041_2507232-2507447_2507799-2508063_2508662-2509397_2509606-2509750_2509904-2510251	TCONS_00925885	XLOC_234105	database_lncRNA_id:"100576319"	chrLG8	+ 2504545-2504628_2504769-2505041_2507232-2507447_2507799-2508063_2508662-2509397_2509606-2509750_2509904-2510251	TTTTGGATTATAGAGGCTAATAAAATCCCCATAATCCAGCTACGACATTTCATTGGTTAGGGATAGACGCGAAAGTGACCACAGGTCATAATTTTGAAGAAATTCGTTTATAAGAAATAATAAGTAATGTGTTATGGAAGACATGACGACGATCAGGGTGGTCCTCTCTCACGATTCAAGAAACCTCGTTCTGGAACCGATGTATACACGGTACACGCGTCGTCAACGGAGCCGTCGACGTCGTGGATGCTGCCAGAAAGAAAGTTGATCTGAAAATCAAACAAACAACCGACGCTGCGTTTCTGCACTTCCGTCGTCACCGTTTGTTTATTGTCACTGAGGGATCACTGTTTTAGACGACAAAAAAAGAAAAAAATAGGAATTGTTCAGAACATTCAT…
>TCONS_00812008 database_lncRNA_id:"100576331" chrLG6 + 9469119-9469583_9470122-9470496	TCONS_00812008	XLOC_203914	database_lncRNA_id:"100576331"	chrLG6	+ 9469119-9469583_9470122-9470496	GAAAAAATGTACTTGTCTATGGAGAATAAAATTATAATTAGTGGAATTGGCACAAATAAGAAATTTAGACCTTAAATCATGAGAAGTTTATATTTCAGGCGTTGAAAGAATCGAATCGAACATTTATGGATTAAATATAGATACTTAAAAGAAAAATATAATAATAGGTGCAAAATCGTGAAACAGAAACCATAAATGCCATGCACCGCGATGTGTCGTGCGTATAACCAGCATTTCAACATCTGCCATCAGACCACTAACAGGCTGACAGGCTGACCACGCATTTGCGCAACTGTCGCCTCGTCGCTTCTCGGCCTGATCGTTTATAAGCTGTCCAATGACCGATGATAATGATAATTTTCAGCTTCCAAAGAGGTGTCACCCAGATGTTACGCGCTA…
>TCONS_00142304 database_lncRNA_id:"100576338" chrLG1 - 18102602-18102652_18104373-18104588_18104739-18104945_18105023-18105113_18105474-18105575	TCONS_00142304	XLOC_046196	database_lncRNA_id:"100576338"	chrLG1	- 18102602-18102652_18104373-18104588_18104739-18104945_18105023-18105113_18105474-18105575	GCCATATCTTCGAGACAGTGTTAACGACGATGAACTTCCTCCATTGCAAGACATTCAACTTCGTTTGGGATATCTTTGGAATAAATGAATGCAAATTTCGAAATAATTCTCGTGCGATGGAGAAATAGTTACAGAATCTGGAACGATCCTCGAGCAAAACGCGATTTGGTAGCAGAATTTCGTCGGTATGCAGCACGACAACGATAAACGTTCGATGCGTGTGCTATAAGCGTGGTGCACACTTCTCTCAAGGATGCAGGACACAAAGGATATGGATTCAATAAGAGAATGACAATGTACTTATTAGGAGTTGTAATGCATATTCGATAGAAACGATAACACAATGAACAAACAAATTATTTAATTTTCAATTGTCCTGATTTTTTCTCCCGGTTTCCA…
>TCONS_00010843 database_lncRNA_id:"100576358" GL630370.1 - 146128-146425_147221-147359_147452-148012	TCONS_00010843	XLOC_003768	database_lncRNA_id:"100576358"	GL630370.1	- 146128-146425_147221-147359_147452-148012	ATAAAATCACTATAAATTTGCCCGAACTTTTTATTAGCAAAAGAAAAATTAGAAATACTGTCACACATTAGTCTATTCTTAATTTAATCGGTGTAAGAAAATAGATATGCTCAGAGTAGGCATATTTTGAGCATTTTATGTTGCGTATAGCAGTTTAAACAGTTGTGTATAGGTCAACATAGGATAAGTTTTGGTTTATAATGTTAGAAGATCCAGTTAAAATGTTCGGTGGTATTCAGTTCGCATGGTAGAATCCGATACGCATTGGATGCTATTTAATTAAAAATAGTGATTTGGATAAATAAGTGATTTATCAAATTTTGAATGATAGAGAATATATTTGCGACGTCCGATCGAAAAATAAAATTGTGAAATCTATTTTTGAGAAAACAACAACGA…
>TCONS_00010946 database_lncRNA_id:"100576358" GL630370.1 - 147043-147359_147452-148002	TCONS_00010946	XLOC_003768	database_lncRNA_id:"100576358"	GL630370.1	- 147043-147359_147452-148002	TATAAATTTGCCCGAACTTTTTATTAGCAAAAGAAAAATTAGAAATACTGTCACACATTAGTCTATTCTTAATTTAATCGGTGTAAGAAAATAGATATGCTCAGAGTAGGCATATTTTGAGCATTTTATGTTGCGTATAGCAGTTTAAACAGTTGTGTATAGGTCAACATAGGATAAGTTTTGGTTTATAATGTTAGAAGATCCAGTTAAAATGTTCGGTGGTATTCAGTTCGCATGGTAGAATCCGATACGCATTGGATGCTATTTAATTAAAAATAGTGATTTGGATAAATAAGTGATTTATCAAATTTTGAATGATAGAGAATATATTTGCGACGTCCGATCGAAAAATAAAATTGTGAAATCTATTTTTGAGAAAACAACAACGACAAACGTTAT…
>TCONS_00372278 database_lncRNA_id:"100576397" chrLG13 - 1242294-1243129_1244571-1244837_1244923-1246475	TCONS_00372278	XLOC_106166	database_lncRNA_id:"100576397"	chrLG13	- 1242294-1243129_1244571-1244837_1244923-1246475	TCTTAATTATATCTCGTTATTGATCCAAAGAAGGTTTACATCGAACACGAGGGAAAAAAAATAAAAAGAAGAGAAGACGAAGCATTTGCCTTTCCGACGACGCGGAGTCACGTGCCGAGATAAGTGCTCCTCAATTTGGAGACAATCGAATTCCTCCTCTGCATACAATTCTCGAGGTAACGGTGAGACACAACACGTGACATCACGTATCCTGGCTTGACCGAGGTAGCTTGTTAAACAGGTGACCATTTATTTTCCTCTCTCATTTTCTTCCCATTGTCGTTCTCTCGTACGAAGGTGGAAAAAAAAAGAAAGAAAGAAAGAACTCCTTTTTCCAGCTTCTCTTCGAAGCGATAAATCTCGCGACTTTTCTTTTTCCAACGTTCTAACGTTACGTGG…
>TCONS_00383860 database_lncRNA_id:"100576397" chrLG13 - 1243337-1243784_1244571-1244837_1244923-1245605	TCONS_00383860	XLOC_106166	database_lncRNA_id:"100576397"	chrLG13	- 1243337-1243784_1244571-1244837_1244923-1245605	TATTTTTCCCGAGATAATTTTTAAAACAAATTCGCGAATAATTTCTATCTCTTTATGGATCGAGTCACGGTGAGTGAAGATAGCGTTGTACGAAGTAGAACGAGACGCGATATCTGGAAAGATTGCAACAAGCCAATCAGGATTTAGGAGTGTAACGTAAGATTCGATGGACAGGTGGCGTAAGAGTAGAGTGAGGTTACGTCGTACGATTATTTTTCACGCGTGAAAACAAGCTCTAAAAATATATTCAGGTTCACGTTCAAGAGTGAGCGATTTTGCTCGTGCGCACGTGCGTTTTTCTTCTTTCTTTTTTCTTTCCTTTTTGCGAGAAATCTCGAATGCCTTAAAAATTGTCGACGTGACATAAGTTTAAAGTTTGTGTCGCATTCCCTTCGGGCA…
>TCONS_00410642 database_lncRNA_id:"100576397" chrLG13 - 1242294-1243129_1244571-1244693_1244842-1246481	TCONS_00410642	XLOC_106166	database_lncRNA_id:"100576397"	chrLG13	- 1242294-1243129_1244571-1244693_1244842-1246481	TTCCATTCTTAATTATATCTCGTTATTGATCCAAAGAAGGTTTACATCGAACACGAGGGAAAAAAAATAAAAAGAAGAGAAGACGAAGCATTTGCCTTTCCGACGACGCGGAGTCACGTGCCGAGATAAGTGCTCCTCAATTTGGAGACAATCGAATTCCTCCTCTGCATACAATTCTCGAGGTAACGGTGAGACACAACACGTGACATCACGTATCCTGGCTTGACCGAGGTAGCTTGTTAAACAGGTGACCATTTATTTTCCTCTCTCATTTTCTTCCCATTGTCGTTCTCTCGTACGAAGGTGGAAAAAAAAAGAAAGAAAGAAAGAACTCCTTTTTCCAGCTTCTCTTCGAAGCGATAAATCTCGCGACTTTTCTTTTTCCAACGTTCTAACGTT…
>TCONS_00546711 database_lncRNA_id:"100576403" chrLG2 + 9285236-9285432_9285713-9285769_9285835-9285945_9286021-9286538_9286633-9286706	TCONS_00546711	XLOC_143624	database_lncRNA_id:"100576403"	chrLG2	+ 9285236-9285432_9285713-9285769_9285835-9285945_9286021-9286538_9286633-9286706	TTTGTACTTTACCGAATTTGACAAGTTGATCTAAGTTTAAATGTAAATAATCTTGAAACGCAAAACTTAAAGATAACATAATGGAAAATAATCTAAAAATATATGTGAAATAAATATATTCATCAGCTGTAAAATATCATTTATTTCAATTAAGAATTGGAATTTATGTCCAGATGATTTTTGATATCACATATGAGGCATAAACTTTTTTTTAATCCTAACGTGATTAATAATTCGAATATCGCATGCTATTGGATAGAAGAATTAAAACGATGTTCATTTTATTCAATGGAATTTCAAGTTATTAAATGAGGAGCACTGTTTATCTGAACTTGTATAGGAACGCTCGTTGATCTAGGACGTATGTGGTTGCAGGCTAAAGGGGGAGGTTTCCTTCGT…
>TCONS_00582713 database_lncRNA_id:"100576403" chrLG2 + 9285792-9285957_9286021-9286434	TCONS_00582713	XLOC_143624	database_lncRNA_id:"100576403"	chrLG2	+ 9285792-9285957_9286021-9286434	ATTTTGAACTAATTTAGTCTCTAACCTAATCATAAAATTTCAGGATAGAAGAATTAAAACGATGTTCATTTTATTCAATGGAATTTCAAGTTATTAAATGAGGAGCACTGTTTATCTGAACTTGTATAGGAACGCTCGTTGATCTAGGACGTATGCAAGTAAATATGTGGTTGCAGGCTAAAGGGGGAGGTTTCCTTCGTGGAAGGTGGAAATTCGCGGAGGTGTCTGCATCCCGAGCCCAGGTCATTTCAGGTCGAAAGTTCGTCGGGCCATACATCTCTCTATACATAGAAGCGATTTACCTCTCTTCCCCCTTGATGCTTCCACCCTTTCCTCTCTTTCTCGCGCATCCTGTCCCGTGGACTGACAGCTGAAGCCAGAACTGACTGAAATATTCAT…
>TCONS_00649417 database_lncRNA_id:"100576419" chrLG3 + 8638677-8640232_8640530-8640645_8640838-8642036_8642635-8644271	TCONS_00649417	XLOC_160005	database_lncRNA_id:"100576419"	chrLG3	+ 8638677-8640232_8640530-8640645_8640838-8642036_8642635-8644271	ACAGAATAAAGTTATTTAGTTCCATGAAAAAATTGTCTTTGATTTTCTAAAAAAAATCCGCAATTACTTAGTTGCCAACTCAATATATACAGAATACGATTATTAGCTCGATGGAATAAGGGAGAAGATTTCTCGAAGGGTTTTTCGAATTTGGAATAAACGTAAGTATATGTACGAGTGATTGTTTCGAAGGAAAATATTTATACACGATCCGATTACACAGGAAAGGAAAGGGAAAAATGGAAGGGAACGACACGAAGGGAAAGAAATGTTGTGAAAATTGTTGAACGGAAGGCGAAGGCGGGTATATAAATATAAATTTCAACTCGTGTGTACACAAACATAAATGTCACAACTAAAACGTCAAATTGTGGATATTCATAACAGAGAATGTTCCAT…
>TCONS_00224720 database_lncRNA_id:"100576423" chrLG10 - 11945929-11946415_11946508-11947141	TCONS_00224720	XLOC_067739	database_lncRNA_id:"100576423"	chrLG10	- 11945929-11946415_11946508-11947141	CTTTATGTGGTCATTAGTGTTCTCGTTTTCAAGCCTCGTGTTTCGTATCCGAGTAAAAGTGAGTCCTAAATAAACGACATGCATGACCATAAATATACTTCCCATGTCGACAAAAAACTCATGTCATTTAGTGAATTGCCCGTGTCTATTATAAAATTAAAAGAAATAGATAGGATAAAATGTTTCATGTGTGATAATCGCTATTATTTTTATTTCTAACCTCCTTCGTACCCTACTAACCGCGCGTCATTCTATTTAAGTCAAGGAAGTGATGAATAACGTGCGAGTTTGACATAATTTTCTCAACGAGTGGGTCGAATATCAAGGTGTAAATCCTAATCTAATGTATGTGTTGTATCTAATGTATTTGCTGCCTGAAAATGTCCGAAATTCTAAGCA…
>TCONS_00612043 database_lncRNA_id:"100576430" chrLG3 - 6060961-6061382_6061471-6062012_6062450-6066661_6066764-6068735	TCONS_00612043	XLOC_164014	database_lncRNA_id:"100576430"	chrLG3	- 6060961-6061382_6061471-6062012_6062450-6066661_6066764-6068735	GCACATTCAAAAATTTGTTAAATTTTGATCAAATAATCGATGTATTAAGACAAAATGCGTATATTCCAAAAAATAATCGTTATTAAATTTTTTACACTCGATAAAAATGTAAGAATTTTATCTTTAAACGAATAAAAAGTTTCATTCTGGTTGGCTGTTTTGACATTTTGATCAAGAGAATTGCTTTAAGTGCCTTTTTTCAATAAATGCTCCTCTGAATTTTGCAATTTTGTGTCTGAAATTTTTCAAAACTGGTCTTCAAGCATTCGGTGCGTAGACATATCTACGACGTATGTGCACGATAAATCGAAATATATCGACTGCGATCAAGATCGAAAGCGTACATCGAATAGCCTGCGAGAATTCCTCTTTTCCCTTGTAAAGGATCGACGCGATAGT…
>TCONS_00163565 database_lncRNA_id:"100576445" chrLG1 + 10440854-10441828_10444283-10444331_10444411-10444551_10444847-10449079_10449674-10450314	TCONS_00163565	XLOC_029806	database_lncRNA_id:"100576445"	chrLG1	+ 10440854-10441828_10444283-10444331_10444411-10444551_10444847-10449079_10449674-10450314	TAATCATTATCAATCACGATTATTATCACAGATAACTGGATATTCACAAATCAATAATCAAACATACAGTCATGACGCGACACTGATTTTCCAATCCGTGCTAACGAATCACGTTGTCCCACTTTTCATGGTTAAAAGTCTATTTTATGCATCCCCATTCCGGATCCATCTGATGGTATCTAACAAACATCCGAGTTTCGAACGAGCGTGTCCCTCGATTCGATCCCCCCTGCGTGTTCACAATGTCCAATTTGTCCGCCCCTTTTTATCATTTCCCCGTTACCACTCTAATCCTCCACCTGTACCGTTTTTCAGCGGATCCCTTGATCGGTGAATCGCGGTATCAGATGGGCGGGGGACACATTAGTTAGCGGTAACAAGCGCGGCGAACAACTGCGT…
>TCONS_00918745 database_lncRNA_id:"100576451" chrLG8 + 7349660-7349774_7349922-7350172_7350250-7350323_7414975-7415946	TCONS_00918745	XLOC_236469	database_lncRNA_id:"100576451"	chrLG8	+ 7349660-7349774_7349922-7350172_7350250-7350323_7414975-7415946	TATTATAGTCGAACAGTCTCCCCTCTCCAATTTGAAATTCGATACGATTATTATGGCTCGGAGCGACATTGTGCTATCGATATTCGTGGTGATGGAAGCGTTATTTTTCCGTGAGATTATTAGCTGATTGCTGATGAATTCGAGTGCGGGAAAATTTTCGATATGTAGACGCCATGTGATATATTGTGTGTTCTTTATTTGTTGCGTAGTTTTTTTAATTCTTTAGAGAATACGTAAAATTAGAGTCAGTGATTAGATTGTTCCTATCCATTGATATATATATATATTTTTTTTAATGTCGAGTATGTATATGTACAATCTAGTCAATGTTTCTCTCAAGAGGTTAAGACAAACATCCATACGAAGATTTTTTCCACGATTTTGACAATTTATAATTTT…
>TCONS_00212852 database_lncRNA_id:"100576452" chrLG10 - 11907992-11908658_11908754-11908937_11909000-11910574_11910652-11910971	TCONS_00212852	XLOC_067709	database_lncRNA_id:"100576452"	chrLG10	- 11907992-11908658_11908754-11908937_11909000-11910574_11910652-11910971	AGGCAAGCGATTTTTCCGGGTGATAAGAAAGGAAAGAAAAAAAAAAAAAAAGAAAAAGGAGAATAAATAAAGAGAATCTTTTCTACCGTTAAACAAAACGATAAATCAATGTAATGGGATTTTAAGGAAAATTCGAAAACTCGTTGTGTCGTGAATATTCTTACCGATTATTCTAGCAAACCGATGGTTTTCCATATCCGAAGCGAAATGGTTTCAAAGACACTTTTAAATCCAATAAACTACGTCCACTTAATAATACACGTATTATCTTTAACGATTGTATCGACAGAATTATTAATAAGCAAGGTTTTCCATCCAAGGTTATATATCAATCATCGCCTCGGTTCGTTTTTCGCCACGTTATTATCCACACTGTTATTCCGTGCAATCTACAAGGGA…
>TCONS_00316535 database_lncRNA_id:"100576483" chrLG11 + 10565240-10566056_10566308-10566446_10567081-10567427_10567861-10568328	TCONS_00316535	XLOC_074715	database_lncRNA_id:"100576483"	chrLG11	+ 10565240-10566056_10566308-10566446_10567081-10567427_10567861-10568328	GTTGAATTCACATTTCAATTCCAATAATAATCTATTTTCTATCGAAATGGAATGTCTAACAAATGTATTCCTGGAAAAGGTGAACACACCTACAATGAATTCTAAAATATATTTCACTTCACTTTACGCCTGAAATTGCACAATTCCTTCTATAGCATCGTCGTATATTGGCACATACGTTCGAAATTCTTGCGCAATGACAGTTTGCAGATTTTCCGCTCGCTACGCGCGTAGGTGTCGATTGCATTCGCGAAATGTTGAGTAGACATCGCAAAAGAACGCTTCGATCATCGACGAACTTGGTTTTATCGTCGAATTTTTGTCCGTGTGTTCCTCGTTGCGAATAAGTTTCGCGCCACTGCCGCCATTTGCATAATGGCGTCCGCGCAAAATCAGTGT…
>TCONS_00377460 database_lncRNA_id:"100576493" chrLG13 + 6860532-6861535_6861615-6861808_6861942-6862822	TCONS_00377460	XLOC_103476	database_lncRNA_id:"100576493"	chrLG13	+ 6860532-6861535_6861615-6861808_6861942-6862822	CGCGGAGCTCGTTATCAGTATTCATCGTGGCGCGAGGCTAAGACGTAGTGTTCCGAGAAAAGTTTCTTCACGACGAAAAATGGGCTACAAAATGGGGGCCGGTGTGTAATCGAAGGTGGCGACCTCTATCAAAATCTGATCCTCGGTGTTCGATAATTCGTGTAATTGCGAGTTTCCGTCGGGCCCGGAAGTACGAAAATTGATGGTTGCCCGAGCATCGAATGGTCGACGGAGGGACGAGGTGTACGAAATCGATGAACGGGACCAGGACCTTTGCCACGGCGGCTATTCATCAAAACTGCGGATCCTTAATTAAACCTATGCATACAAGCGTAATTAAAAAACGTATTGTGGCAAACAGAGTGGAAAGAGTTCGCCGTTTTCTTCGCCAAATAATTT…
>TCONS_00947727 database_lncRNA_id:"100576503" chrLG8 - 7344415-7345059_7345133-7345646_7346552-7346715_7346811-7347163	TCONS_00947727	XLOC_241758	database_lncRNA_id:"100576503"	chrLG8	- 7344415-7345059_7345133-7345646_7346552-7346715_7346811-7347163	TAAAAATTGATAATTGGATTTTTTTTCTTATCGTGGATAAATATTTTTAACGGTATAATGCTATAATTCGTTTAATTCGAGTTCTGTGTAGAAATATTATTTCCACACGCGAGTGAACGCATACATCGTTGACAAAAGGTGACAAAGATTAATACGAGGCATGATTAAATGAAACCTCGTACATTGTTCCAACGCGAGTGTATTATCCATTCTTCGAGAATAAATTTTCTTTTCCCTTGATAAGGACACGCGGTTCGTAATATCCGTAAATACGGATTCGAACGAATATGCGAGCGAATTAAATCCGCAGCGAAAGAAATAAAACCGTGGAAATCCTGTTAAAGTGGAAATTGGTCAGCTATTGTATTGCAACTTCAAGGATCGTACGAGACGATTTGT…
>TCONS_00335979 database_lncRNA_id:"100576513" chrLG12 + 4400205-4400486_4400561-4400666_4401456-4401677_4402038-4402125_4403021-4403095_4403189-4403930	TCONS_00335979	XLOC_086974	database_lncRNA_id:"100576513"	chrLG12	+ 4400205-4400486_4400561-4400666_4401456-4401677_4402038-4402125_4403021-4403095_4403189-4403930	ATTGTGTTAAAACTTATTAAAAGATCACACCAAAAATGGAACAATTGAATATGGAAAAAAATTTCGAACGCTATTTGATCGAAACAAATTAAGCGCAACGGCTGTTATAAATTTCATCTTGACGAACGATAAAATCGCCGCTACAACCGCACTCGATTTGATTGGATTTTTTCCTACCTCTATTAATAATAGTCACGTTCAACACTGTTCACGTTACGTGTTGAAAAATATTAAATTGAGCATCCAGACCTTTTAAAATTCATACGTATTCTATGCGGTAAAGAACAAGAAAAACTGGAACTGTAAATGAAATGTAATAAAAGAATTATCACGAATAATTGTGAAAAACAACAACTCAAAATAATTTCTTTAAAATAATGAAACAAAGTGAATAAATAC…
>TCONS_00778764 database_lncRNA_id:"100576517" chrLG6 + 9525336-9525912_9526014-9526046	TCONS_00778764	XLOC_203978	database_lncRNA_id:"100576517"	chrLG6	+ 9525336-9525912_9526014-9526046	AGCAACTCGAAGCGTAACTCTATTACATCTTCGTCTCGTTATCCGCGGGAAGAATAAAGGGAATCATGGCTTCCGTTTGAAGCTCGGTTCATAGATCAGCTTGCGGTTTCTATAATTTCAGAGATTGAACGCCGCTTATACGCACCCGCATCCACGAAATCACACTGCTCTTGCAGAGAAGGGGGAAATTAATATCCAGGTGAAATTACCATTTATTTCCACGTCCCCGGCAATCAGGGAATACGCGGCTAAATGTTAATGGATGACCACTGACAGCAAATTGAATACAGGCATCGATTTCAAGGCGATACCCTGCATGTATACCACGACGCGCCACTTGATCAACCGTTGACCTATCAACTCGTTCGTTCGTAGCGACATCGCTCGGACAGGAGATAG…
>TCONS_00322327 database_lncRNA_id:"100576520" chrLG12 + 9971452-9971590_9971689-9971842_9971936-9972019_9972109-9975482	TCONS_00322327	XLOC_089350	database_lncRNA_id:"100576520"	chrLG12	+ 9971452-9971590_9971689-9971842_9971936-9972019_9972109-9975482	GTGGTATCCTTTTATACTTTCGTAGATTAATTATAATTTAAAAACTATTTAAATGGGATTATATTATGGCATAACGAGATATAATAAACGAAAAGATATTCTTACGGAATTTTGATATATTTGTTAAATACAATTACACCAATAATTAATGTTATTTAAAAATTAAAAGACTTACTTGATATGCAAAACAATGTAATAAAATAATTTATATTGTTTATATATAATTATAATTAGGCGTAAATAAAAAATTAAAAATGTTATTCTGGTTCTATCCTTACAATACAATTTTTAAGGTGTTATTTACTGTAAGGAAGCATAACAGAGTTACAACAATAAATAAATAAATAACCTAATATATCTAAAGGTTTAAGAAATAAGTATTTGAAGAATCAGATTTCA…
>TCONS_00018424 database_lncRNA_id:"100576535" GL630395.1 + 6292-7430_8034-8537	TCONS_00018424	XLOC_006161	database_lncRNA_id:"100576535"	GL630395.1	+ 6292-7430_8034-8537	TAAAAATTGATTTTATGTTAATAAGATTAGTTAAAAGATTTTTTGTTTCTCTTAATGAGTACTATAAGTTCTTAAAGTTTGGATTCTTTTTTATTAACATCCTATATGTATATTTCTATACATTTTCTTCTATAAATAGTATAGATTAGATAATATTATTTAGTATTATCGTCATGAATAAAATTTAGATTAAATTGTTCAAAATGATGCTTGATAACATATTTATTTTAAATATCGAAATCGATGAAATGATTTTTTTTCTGTATATTGAATACATAATATTTATTTTGAGAACAAAAAAGAAGAAAGCCAGAAAGAAAGAAAGAGATAAACAAATGATAGAATTGTGAAAAGGGATGAGGAGAAAGGGGAAAAGAAATAGCCAGGGAAAATTTGTAT…
>TCONS_00422903 database_lncRNA_id:"100576541" chrLG14 - 2731093-2731796_2732232-2732637	TCONS_00422903	XLOC_118070	database_lncRNA_id:"100576541"	chrLG14	- 2731093-2731796_2732232-2732637	AATTATTTCTAGCGACAAAAGGATTTCTACATATAATATAATGCTTCGATGCAAATTTTCGATGATATCCTTCATTTAAATAAACCGCAATTACATGTTAAACGTAAATAGCAACCGAAAGATGAGCTTTGCTCTTGGTACTCTTTGAATCCTGGTTTATACATTAACCAACTTCGCAAGCGGAACGTGCTAGCTGACATTCGCTAATTAAATTTTGAATACTCTAAAATAATCAGATTCAGGTACGGAAGAGAGACGTGTATTTATGCTCTGAGAAGCGATTTTGAATCGTAATAGTATCGCACAAATATGTTTCCACATTACGACTGAATTTGTCTCCATTTGTATGTTATGCGTATATACGCACGTATATATAAGTGTGCACACGTATAGAAATTA…
>TCONS_00332070 database_lncRNA_id:"100576546" chrLG12 + 6053180-6056509_6056584-6057564_6059765-6061346	TCONS_00332070	XLOC_087742	database_lncRNA_id:"100576546"	chrLG12	+ 6053180-6056509_6056584-6057564_6059765-6061346	TTTGAATACGTTCGATTTCGATTATTTCCGGGATGTTAAAATCTTGCAGCGAATCGTTTTCGTATTTTATTATTATTATCGCGTCATTAACGTATCGGATTTCGTCTCGTTTACGTTGTAATTAGTGTATTCGTCAAACCAATGCCTACTCTAATTTTGCGTGAAAATATAAAGTCGTGTGTGGCGTAGAAAGGCAGCGTTGGATGATGTGGAAAAGGGAACGCGGATTATGTAATGTATTTGAAACGTTTATTAGCGATTGAACTATAGATCCATTGAAATTGGCGGCTCATTCACCGGACGCTAATTTTATCAACCAATACCGAAGTTTCGGTTTTCAATATCAAAGTTCCCCGCTCTGTTAATTAATGAAATTCGCCGTGCTTCGTTTTTTGATCG…
>TCONS_00856829 database_lncRNA_id:"100576549" chrLG7 - 10516461-10519041_10522615-10522617	TCONS_00856829	XLOC_229784	database_lncRNA_id:"100576549"	chrLG7	- 10516461-10519041_10522615-10522617	CATTTGTGTTTGCAGCTGGATCAGAGCGATCTTCCGACGCACCCGCTCAACCGGAGAGATCACCGCCCCCGCTTCCCCCGCCACGCTTTCCGAACAGCGGTGTCTGACAATGGGAAACAGCTCCTCTTAATATTGGTAATCTAGTGATCATGAACGCGTCAATTCCACTGCCGCTACTGCTCACCACCAACAGCCTCACATTGGAAAATCAACTGTACGAGATCATCACGGAGAGGAGCAAGGCCTGCGCGGCTTTCTTGCGGAACAGTTTACGTCGAGCAGTGAACGCAACCACTATTGGTTTGAGTGTCACGGAGAATTTTGAGAATAATGTATCGTGCAATCATGCCTAATTCAATGATTGAATCACTTGTTGATTATATTTGAATACTGAATAGA…
>TCONS_00420373 database_lncRNA_id:"100576564" chrLG14 + 2708628-2717394_2717477-2717672	TCONS_00420373	XLOC_113624	database_lncRNA_id:"100576564"	chrLG14	+ 2708628-2717394_2717477-2717672	GTTTGACAATTTTTCCGCCCTTTTTTTCTTCCTTCCATGTCGGAAGCGAATAAAAATGTCGGGACACTTGATACGCCAGAACAAAAAAAAAAAAAGCTAAGTCCTTTGAATAATGATGGTATAATAAAAAAAAAAAAAATTGTCGATGCCAAGAGGATTCTTGACTCATCGCACGATGGGCTAGGCAATTGAAGACATTTTTACAGAAATCTGAGAAGTTTAGAAGCTTTTTATAATTAGCTACCTCGAAACGAGATCAAAAGAGATAACGAAGTTTCTTGGCGGAATTATCTTCGTTTTAAAATTAAATTAAACACGAAATTTAATCCTTTTCCATTATTCACAAGATTTTAATATAATCTTGAAATTCTAGATTCTAAATTATTATTCCTACACGTT…
>TCONS_00809732 database_lncRNA_id:"100576573" chrLG6 - 11419448-11420485_11421567-11421688	TCONS_00809732	XLOC_214122	database_lncRNA_id:"100576573"	chrLG6	- 11419448-11420485_11421567-11421688	CGACGACGATATCGCTTGTTGATATTGAATTCAAAACATCGATTTAACGCAATCGTGTTTCGTACACAGAACGGAACGGACGTGTCGCTCTTCGCTCCTCGCAAGAATATTTTACTATTTAAGATTCGACGACCGAAAAGTGAAAATATTTACCGCCGGCCAAACCTTGTTACAATGTTCCTGTCTCTCAGGGAGAAGGGATATCCAAGTTTATCTTTTATGGATGGATACTCGAGATATCGATATTTGCGATCAATATGGGTTAGTCGTCGGAACGTGAAAGTGGCATTTGTACGCCGTTCGTGGATAAACTTTACGAGTTGAGCTTTCCTTTTGATTTTTAGTAATCGCGTATCAGCGAGAATATTTGCAAATGTAAACATTTTGCGATATTTGCAC…
>TCONS_00307716 database_lncRNA_id:"100576585" chrLG11 + 13542806-13543221_13543319-13543464_13544145-13544213_13544413-13544644_13544961-13545597	TCONS_00307716	XLOC_076021	database_lncRNA_id:"100576585"	chrLG11	+ 13542806-13543221_13543319-13543464_13544145-13544213_13544413-13544644_13544961-13545597	ACTGTTTCACTAGTGAGGATTCTCGGATTAGAGAGAAACAAAGCGAGGATTTTTTTGTTGTCCGATTGATATGGATATCGTGAAACATCGTTCGACCCAGAAATTACGCGATACGATTTTTTTTCTTACCTAGAAATTTGAATTACGAAGGAACACAGGTGAAAGAGGTTATGTAACTTGCTGTGGTCGTGTTTAGCTGCATCGTCTGGCAAAACTAGCCTTTGTCCATCAAGATTATCCAACGAACGATCGAGATAGCCACGGAACTCTTACACGTTTCAACTACTTACACGAAGGCAAAGGTCAGATTGTCAATTAATTGTGATAATCCGTGAAAAAAGGTGATACGAAAGAAAAATCAAAATATATAAATGGCTAATTGTCGGTAAAATAGTTACC…
>TCONS_00344300 database_lncRNA_id:"100576593" chrLG12 + 6015814-6016072_6033979-6034090_6034155-6036222	TCONS_00344300	XLOC_087742	database_lncRNA_id:"100576593"	chrLG12	+ 6015814-6016072_6033979-6034090_6034155-6036222	CGCGACGCAATACGAGCGTAGAAGGAGGAGTTTCAGTGAAATTGCGTTTGGAATTTGCGTCGTCTTCTTTCCGTTGATGTCTCCTTTCCAAGTGATAATTTAATTAGTGGGTGCGCGATGATTTCGTCTTGTTTTTTTGTGTTTATTTGTGGTGTTTATTCGTGGATTATTCCTTCGATTTTGGAAGAAACGTTCAACGAGGATATTGTTGTGGAAAGTTGAAGTAAATGGAGAGAGGAAGGATTTGGATAAAAGATTCAGGAAGAAGAAGAAGAAGAAGAAGGAATGAAGTTATTCGTAATTCGTCTCGCCACTTGAACAAAGGCAATTTAACGGTCTAAGCACGTACAATGGAATTCTTAATTTAACAGAGATTCGCAAAAGTGTAGGAGTGAATAG…
>TCONS_00717884 database_lncRNA_id:"100576597" chrLG5 - 10753746-10754262_10754355-10754674_10755087-10756152	TCONS_00717884	XLOC_195678	database_lncRNA_id:"100576597"	chrLG5	- 10753746-10754262_10754355-10754674_10755087-10756152	AAATTTGAATATCCAAGTTTAAAACACTTTGCATGCAGACATCACATTTAGCAATCAGCCATCATTCCTCTTCCTTTCCTTTTTAGGATACTGCAATTTCATTCTGTCATCATCTTATTGGATAAATTCTTTTTTCTACACAATCAAGAAATCCTTTGTCATTATCTTTTTCCTTCGATGACAGATCCCGACAAAATACAAGTCTTGAATACTTCTCGAAATAAATGATAACAAATCACTATGCACATCATTGTGTAACATAACCAACCAATCAACACTACACCAATAATACAATCAACACTAGGATTTTTTAAATCACATATATAACTTCAGAATTTTCTATATCTATGATATTCATTTTATATAAATTATAGTAATTATATTTAATTCCACTTTGTA…
>TCONS_00884843 database_lncRNA_id:"100576599" chrLG7 + 12470437-12470822_12471076-12471305_12471915-12472174_12472254-12473591	TCONS_00884843	XLOC_225282	database_lncRNA_id:"100576599"	chrLG7	+ 12470437-12470822_12471076-12471305_12471915-12472174_12472254-12473591	TGAAAATACAAATAATTAAATAAAAAATAAATGTATCGTATTTTAAAAATCATCAAGGCTAGTTATCCTTTTCTCATGTGCTTCAGTCTCTTCTTTTCTAGTCAACCGAACAAGCAATTTCCATGATGGGAAAGTCACGATGGTGGTCACATCCTTAGCATGAAACTGTTCGAACGAATAGAGAGTTGAAGATGCATCTGAGGTCGAAAAAAATTATGTTGGGTCGAAAGTGAAACTATCATTTCAACGTGGAAATATGATCGAACGATAAAAAAAAACAATTTAAATAATGAATTTCATAAGAAACTCGTTAAAGATTTTCGAGATATTTATTTAAAATTTAAATTATTATTATATTTATACATGGAATTTTTCATATTTAAGAGTGAATTTCCGGCA…
>TCONS_00183441 database_lncRNA_id:"100576602" chrLG1 - 2173827-2174293_2174403-2176522_2176637-2176713_2177241-2177375_2177464-2179125_2179210-2179442_2180800-2180885_2181171-2182756	TCONS_00183441	XLOC_039167	database_lncRNA_id:"100576602"	chrLG1	- 2173827-2174293_2174403-2176522_2176637-2176713_2177241-2177375_2177464-2179125_2179210-2179442_2180800-2180885_2181171-2182756	AATCAATTGAAATAATTAATCGTACATTTATAGAGACATTACGATACTTTGTTCGAAATTACGTGTTATTATGTATAGCGTGGGTACTGCTTTTATAACCTCGAAACGGTTTGTTTCGGCGTTGTTCCAGACGAATCTATTAAATTGTTATATCGCTATCATTCACGACGACGTTTCCCTTTATTAAAATACCCGATCGATATGGAAAGAGATTGGATAAACTAACCTGGATAGAAACGTTCCATTTTCATGATGGAGAACGAAAACGAAGTTGGATCGACAATGACTTAGCTGCTATATAGAAAGATACGACAGGTATGCGCGGAGAGAGGTGCGCCGAGAAAAATCAGACCGATGGATATAATCCGAAACTTGATTACGCCTTTCGTCGTTTTCCGT…
>TCONS_00297244 database_lncRNA_id:"100576609" chrLG11 - 13561299-13561897_13562261-13562556_13562808-13562923	TCONS_00297244	XLOC_082116	database_lncRNA_id:"100576609"	chrLG11	- 13561299-13561897_13562261-13562556_13562808-13562923	GGACAAAGAAGTGACGGAATAAAGAGGAATTTATTATGTTCGGGGATTAAATTGCACGTCAACGCATGTTTTTATCATTGGAAGGACGTCCAATGATAAATGTCCTTCGATCTACCTTTTAAAATGTTGAATTAATTGGAAATGGACTACAAACCCTGAACGAGAGATGCGACCTTTGGTGTAAGAGAATAAAGATAAACGTGTAATTTGCCTACGGAAAAGTGTACGTACGACTGTGATTACGAGTGTCATCAATCGTGAGAAAGTATGTATATACTCGCGACCTTTTACATCGTCACCGTTAATTCACAACGTCCTCGCAATAAATTAGGACGAAACTCACGGTCAGCTTACTATGTACTTGCCTACGTGCCCGGTGAACATGGCTAGATCTATCGA…
>TCONS_00301199 database_lncRNA_id:"100576609" chrLG11 - 13559314-13560714_13561420-13561420	TCONS_00301199	XLOC_082116	database_lncRNA_id:"100576609"	chrLG11	- 13559314-13560714_13561420-13561420	TTTAGATTCGAGGGTGACTTACTGGTGGGTTTTTCGAGCACTCTTTTGCGAACCTGTGCTAGACATACCTCGTGGGGCACCTTTAAACAAAACGATCATTCGTTATTGGGCTCGGTTCGAGTCGATCAGATTCACTAGGATCGATATAGGGTCGCTAAGATCATCGCTTATGACGAAGGAAGGCGGACGAATCTTTTTGAGGTTATCGAATTTCGTTGCTCGTTACTGGTCGCTGTTGAGTCGGTTATTTATAACCGTCTGTTGATAAATATCGATCGGTAATTCTTATCGACTTAAATATTTAAGATTTTCGAAATTTTTTGAGATTATAGATACAGTAGTCTAGAATTTTGTTTGAAAAAATAAAAAATGGAAAAATAAAGTACTGTATATGAAGAA…
>TCONS_00433975 database_lncRNA_id:"100576627" chrLG14 + 7056112-7056203_7056426-7056494_7056564-7057045_7057155-7057390_7057493-7057731_7057796-7057886_7057972-7058922	TCONS_00433975	XLOC_115293	database_lncRNA_id:"100576627"	chrLG14	+ 7056112-7056203_7056426-7056494_7056564-7057045_7057155-7057390_7057493-7057731_7057796-7057886_7057972-7058922	ACCAAACATAAAAGAATATTTAGACTTAATCTTAAATTTTTTTAAATTTAATCTAAAATCTTCAAATAATATTCTGGAAATTCCATTTCAACATTTCAACTAAAATGAAAAGGGAACAAATAGCATTTTTCAATGAATTGTATTTCTAGACAAATTATCATACAGTCTGACAATGAAAATGGTTTTGTTGTGTGTCTCTAATGCGATGGTAGCGGAAGTAACCTTTTATTGTGTCCGAATACTCGAGTCTGAAAAATTACGTAAAATCGGCGGATTGTGTGATGTAACGAAGAAACGCAGAACAAAACGAATATCACGAAGTTCATCCTCTAACAATGAATCATCTTTTATATTTTTTTCTTTCTTTCGCTCGTCAAGCCACAGTACTTCCGGTGAGTA…
>TCONS_00705660 database_lncRNA_id:"100576628" chrLG5 + 6636876-6637291_6637376-6639752	TCONS_00705660	XLOC_187566	database_lncRNA_id:"100576628"	chrLG5	+ 6636876-6637291_6637376-6639752	CTTCATGGAAATCATTTTTCAAAGGAACGATTTTATGCATCGAAGAAAATATCTGTCACTAGCAACGACCTTATCAGTCAACAGCTTATCATCGACCTCACGTAGTTGAGGACAGGTTTATGACTTGACTGCTGGAATCGCGAACAAGTGTATCTCCGTTACCTCAAACGGTTCCTCTTTTCTTAATACCTCTTTTTGACGTAGACACATTCTTGTTTTGAGAAAACTAAGACAAAGCAGAATATTTGCAAAACATATGCGAAAAGAGACACGATTTTCCGAACGTGGTATAACTATATATTGTCTTATAATCGCGAAAGAAGATTCGAGACACGTGTGAAGACGGACAAACAGCACCGATTCAACTTCAAAGAAATTTCTTTAACGTCGACACGATGT…
>TCONS_00338593 database_lncRNA_id:"100576630" chrLG12 - 10223325-10223567_10223639-10224024_10225197-10225502_10225677-10225709_10225780-10225801	TCONS_00338593	XLOC_095268	database_lncRNA_id:"100576630"	chrLG12	- 10223325-10223567_10223639-10224024_10225197-10225502_10225677-10225709_10225780-10225801	TTACAATGCAATTGTAACGAAGGTATCGTTTGCTGTAATCTAGTAATGAAATAAGACAAAGATTCAACTGTCGTTTATTATTCATCTCTCAAGTTTCAAGATAGATTCTCGAAATCTCGAAAAATTTCTTGCTCTCCGGAGAAAGCAAGGTTTCGCGTGGCAGTAGACGAAAAGAAAAGAAAACGAGAAGACTGGAATCAGAAAGATCGTACATCGAAATATCAGAGACTGGATTGCACGTTTCATTGTTGACTGTCGTTCGTCGTTCCGTTTAACTATTCATTTCATTTCCCTTGGAACGATACTGAAACACTTGACACGATTTCTGAACCGTTCTCTCGTTGTTAATGCAGCAACCGAGCCTTTTCATTTTTAATCTTCCTTCCGCTCATTCGCGCC…
>TCONS_00061135 database_lncRNA_id:"100576631" GL632155.1 + 113-504_1279-1692_3773-6952	TCONS_00061135	XLOC_019167	database_lncRNA_id:"100576631"	GL632155.1	+ 113-504_1279-1692_3773-6952	GAAATTTATATTAAATTTTTCGTACGAGATTCAAAAATCGATGATTCAAATAAATCACGGATCGATGAAGGAAAATAAATTATTAACAAATTTTCTTTCTCTTTTTCTCTCTCGATTATTCGAAATATTCGAAATTCACTAATTTTCAAATACGATACGAAAAATTTCAAAGTAAAATTGTCGTCTGAACAATTGAAATTATTATACAGAATCAAATTACATCGATTGAGTTTACATATACGCAAAGGCGCGACACGTATCTTGTATATATTTATACTCGAATCGAGTATCATTGGGTCGGTGTTTCGATTCTGTTTCGTTTGTTTTGGACGACGACGCGACACAGCGAAGCAGCTCAGTAGAGAAAAGGCATCGGCACGATCCACATCCACCTCGCGA…
>TCONS_00642999 database_lncRNA_id:"100576644" chrLG3 - 6969087-6969153_6969428-6973266	TCONS_00642999	XLOC_164494	database_lncRNA_id:"100576644"	chrLG3	- 6969087-6969153_6969428-6973266	GGAAGGAAGGAAAAAATGAATCCGTGGAAGGAATTTATGAAAACGGTGGGACGTAACAAAAATTAATCGCACGGTCCATGCGAGGGCACGCCGGCGAACAATAAACAATGTCAACCGGGTGTGAACGTGTTAAAAGTGCTTGGTACGGATTTTATAAACGCGGCTGGATATAGTGATCGTAAATTAGCGGTGTAAGCACTCTGGAGGAAAAATGTTTGGTGACAAATATAAATTGTTCGAGATTTTTTATCGCTCGATATTTTCTTTTTTCTTTTTTTTAATATTTAAACATTCGAAAAATTAAGTAACGATAATAAAGAAGAAACTCTTGATTAAGTCTTCGAGAAATATTATTCGATGGAATGCCTTTGAAAAAGAATGATTAATATTGCGTTTACA…
>TCONS_00723368 database_lncRNA_id:"100576657" chrLG5 - 6729310-6732209_6732297-6732805	TCONS_00723368	XLOC_193867	database_lncRNA_id:"100576657"	chrLG5	- 6729310-6732209_6732297-6732805	ATCAAATCAAGAATTTTTTCAATTATTTTCATCTTTAATTATCTCATATATTACTGTTGCAATGTCATTTCATCATTTGTTTTCTCTTATTAGCAATATATGTATCCGTTATTGCGTAATTGATAAGTGTTATTGGAGCGGAACTTTCCGAGGAGGATAGAGAAGTATTGAATGCCAGAATTTATATACTACTGTGTTTTATAGCCATCGTTTCCAAAGTAGACTGCAGTGGCGTCACTTGGCGACGAAAATTTCAAACTTGCGGCGCGTTTCATTTCCAAGAATCGTCGGATGACTCATACGTCGAGTTGTGTGGGCGGTGAACGGGGTAGCCGGAACATATCGAACAAGACGCATGACTCACCAATCTGATATGTCGGATACTCGCGCCTTAACCTG…
>TCONS_00780266 database_lncRNA_id:"100576661" chrLG6 + 14696160-14696846_14697310-14698174_14698299-14698367_14698465-14699622	TCONS_00780266	XLOC_207025	database_lncRNA_id:"100576661"	chrLG6	+ 14696160-14696846_14697310-14698174_14698299-14698367_14698465-14699622	TTCAATATTAATTTTGATAATTCTTTAATAATAAGCTCTCGAAGAAATTCATTCGTACAAACAATTTTCAAAGAAATATCTTCAACCGTTTCGATGAAACATTTAAATGGCCACTCTTCGCCGATCAATTCCATTTAACCGAAACTCAATAATCCCATTAGATTAAACCACTTCCCCATTCATCTCGATATTAATTCAATTTAAAATTCATCCCATCCACGCCATAGCGAAGCGTTAAAATCTATGAAACCCGAGTTTCCGTCGAAAATCACCGGCTGGAAAACGGAATTTTCCTTTCCGCTTGCCGTTCCGCATGAAATTTATCATTGGATGGATACTTAACCGATTTACGATCCGGCAAATTTACACCGCGATTCGTCACGTCCGCGTGCGAATTTC…
>TCONS_00788268 database_lncRNA_id:"100576661" chrLG6 + 14696183-14696892_14697310-14698174_14698299-14698367_14698465-14699581	TCONS_00788268	XLOC_207025	database_lncRNA_id:"100576661"	chrLG6	+ 14696183-14696892_14697310-14698174_14698299-14698367_14698465-14699581	TTTAATAATAAGCTCTCGAAGAAATTCATTCGTACAAACAATTTTCAAAGAAATATCTTCAACCGTTTCGATGAAACATTTAAATGGCCACTCTTCGCCGATCAATTCCATTTAACCGAAACTCAATAATCCCATTAGATTAAACCACTTCCCCATTCATCTCGATATTAATTCAATTTAAAATTCATCCCATCCACGCCATAGCGAAGCGTTAAAATCTATGAAACCCGAGTTTCCGTCGAAAATCACCGGCTGGAAAACGGAATTTTCCTTTCCGCTTGCCGTTCCGCATGAAATTTATCATTGGATGGATACTTAACCGATTTACGATCCGGCAAATTTACACCGCGATTCGTCACGTCCGCGTGCGAATTTCGATAAACCGGTCAGCTTATAAAA…
>TCONS_00801481 database_lncRNA_id:"100576661" chrLG6 + 14696618-14696892_14697310-14697864_14697917-14698174_14698299-14698367_14698465-14699634	TCONS_00801481	XLOC_207025	database_lncRNA_id:"100576661"	chrLG6	+ 14696618-14696892_14697310-14697864_14697917-14698174_14698299-14698367_14698465-14699634	CAGCCATGCACTGTACCGCGTTTTGGTTAAGCGTGATCACGCTCGCGATCCTCTTGTTTTGGGCTGTGGAGCGTGGAAACACCACTTCGGACCCGGATCCCCGGAATATAATTTACATCATCACCCACGGGAAAAGGAAACACAAAGGGAAGATCATTGAGATCCACAGGCATCGTCCGAAGCACAAGCTGAACATCATACTCGTCAATTCGTGAATAGATCTCGAACGGTGAGGTTAAAGTGGATATAATCGATCGGCAGATGTTCGCGTGTATAAATTTGTTTAAAGTGACGGAGGAACCAGGAAACGTTTCTTTCTCGAGAAAAAGATCAGAGGAAATAACAATGGGCAATTGTAAAATGTGTATTGAGACTATATGATATGTAAAAATTTGATGC…
>TCONS_00752978 database_lncRNA_id:"100576680" chrLG5 + 6642740-6643147_6644489-6644838	TCONS_00752978	XLOC_187568	database_lncRNA_id:"100576680"	chrLG5	+ 6642740-6643147_6644489-6644838	GTCACTTATAAATTCGAATCGATAAAATGCCAATAATTTCATAAACTATTTCCACGATATTCGTCCCTAATTAACCAATAAATTCCAGAGAAATCGCTAAATGGATGGAAAAATCGACGAAGAAAAGTCGATGGAGCCCTCGTAAACCGAAGATTTACTACCTCGCGGGCCGATAAAGTGCCCGTTTGCTCGGATAAAATATAGGTAGTGGCTACTTTGAAATTTCACGACACGTAGTTACGAGATCGAAGTGACGTGGAAAAAGGAAGAGGCAGAGATACATTGCACGAGCCATTGAACGAACGAATCGAAACTCGATTGTTTGGTTGCGTAATTAGACATAGTGGTTGGTGAACGATTACAGTGAAAGTCGTCGACTGATAAAAAAGAAATTATTTC…
>TCONS_00324131 database_lncRNA_id:"100576689" chrLG12 - 6006592-6010023_6014824-6015072_6015245-6015704	TCONS_00324131	XLOC_093150	database_lncRNA_id:"100576689"	chrLG12	- 6006592-6010023_6014824-6015072_6015245-6015704	GGGCGAAGTGTCGCCGGCCGGTTTGTGTTTATTATTTCCCCGGCTAATCCTCGAAAGTCGAGATCCGGGCGTGCGATTGTACATTCAGCTCGAGACCGCCTTTCGAACTCGTACTTCGATCTACGGCCGGAGGACCGTTTTAACACGTTTATACAACACGGCGCCACTCGCGTTATAATTAACGCACGAGGATGCAAACTCGCACTTACGGACGATTAATTAAACCGCACACAAGGGCGGGTTAGCTCTTGGGACTCGTAACGGCCGCATTGTAATGAAATTGTGTTTCCGATGATAAAGATACCAGCAGTTGCTTAACCCTGCTGTTCCACTCCTTTCATAGATTATCGGCCAGCCTGTATTGTCGCGGTGGCGCGTGGCGAATACCGAATATCTGGA…
>TCONS_00849006 database_lncRNA_id:"100576694" chrLG7 + 12460172-12460559_12461041-12461341	TCONS_00849006	XLOC_225275	database_lncRNA_id:"100576694"	chrLG7	+ 12460172-12460559_12461041-12461341	GGGATAAAATATCGAAATAAAATATCGACACGAAACATCGACACAAAGAGACTGAGTAAAGTGAAAACCGCAATGGCCGGTAAGTCGATTAGAAAATATACGACATTTCTCCGATTCTTTTTTCTTCTTTGACACAACGCATGAAAAGTCTGACCTCACGGTATACGTTGGATCAAAGCAAGTTTCTCTCGTCGTGCATTGAGGCCGATTCCACGGCGTAATGCACATATATGACTTATTAAGTCAAGTTTATGACCGACGAACAAACACGAAGAAACATCAAATTATAAGCGTGACAAACATCAATGAACATAATCTGCAACATGTTGTATACTTACTATACTAGTAGTATCATTAAATCTCTTAACATAAACATAAATATATAAAGGTGTATATATG…
>TCONS_00775831 database_lncRNA_id:"100576696" chrLG6 - 15815474-15815766_15815851-15815916	TCONS_00775831	XLOC_216431	database_lncRNA_id:"100576696"	chrLG6	- 15815474-15815766_15815851-15815916	AAATTCTCGTATTCGACCACGGAAATTCACCGATACTAATTTCCTTCCCGTTTAATTGCCTTAGTGATTACGTTCAATGCGCGTGCATAACAATGTCAAAGGAATAAAATTTTGATTACGACACAAAGAGACAGATTTACGCACGATTATGAATACGCTCAATTAAATACAATTAGACACGAAATATTAAGTATCGCGCGGGTAGATTTAATAAACGTGGCAAATAACTTGCGCTTTCTACGAGACACATAAAATTCAAACCACGCTTTTTCCTCTTATTCTATTCTCTTATACTTTATATAACGATAGTTACTAGAAAGTAACTAGGGGGAAAAAAAAAATCCAAACGAAGGAAGATC
>TCONS_00061391 database_lncRNA_id:"100576698" GL632184.1 - 5724-5899_6021-6128_11334-11873	TCONS_00061391	XLOC_019239	database_lncRNA_id:"100576698"	GL632184.1	- 5724-5899_6021-6128_11334-11873	ATAAATACGTTCTTTTATTTCCCCGAGGAGAAGGTTGGGCGAGGAATATCCCGGAAACCTCCATTCGGAAACGTAGTCCTCTCACGATCGGACCCGGCTTGGTGATCACCGTCTGCCTCGGATTAATCCCTTCCTCCCCCTGTCACTCCCCCTCGTCCAACGGAAGCTGATGACATGCCTACGGCCAGACGATGCCTCTCCATCGCCCATCCTCTCCATAACGCTTCTCCTCCTCCTCCTCCTCCTTTGCCTGCCACGATCCTTAAACGTTGGCCGCCGTAGATTAACTTTTGATACGCGACCCGCGAGCGCCTAGTCTCCGTCTGGCCGAGCCTCGATTCGCACGAGTTTGGGGGGGCCGTCGATCTCCTTGCGCCCCGTCGATTATCAAATTTCTAT…
>TCONS_00910723 database_lncRNA_id:"100576699" chrLG8 - 1259142-1260514_1261919-1262238_1262311-1262479_1262560-1263066	TCONS_00910723	XLOC_239498	database_lncRNA_id:"100576699"	chrLG8	- 1259142-1260514_1261919-1262238_1262311-1262479_1262560-1263066	CACGATTCGTAATTAATTTAAACGTTATTATATTTATTTCAATTTAATTTACTGTTTTAATCTATTAAAATTTACCTCTTTTATTTTTTAAAAATCGTTAAACGATATATTAAATATTAGAATCTACATATAAATTCGTCTTAATGAAATTTAAAAAAATTGTTGTATTGTAAAAGCGTCATTAGATTAGATCTTTCTTAATTTACGAACACTCAATAAGTACTGTTGCGACAACGCCATCTACAAGCGAATAATTTGGCGGGAGTATCGGAGAAATTGCGATAGTGGTAAAATAAAATTCATCACGAGCAAGTGGACGAATCGAAGTGGAATTAGGTTATACAATATTAAATTTTCGTGAAGCCCAAATACGAATTTTCGAGAATTTCGTCTCTGAAT…
>TCONS_00083649 database_lncRNA_id:"100576726" chrLG1 + 7766174-7767037_7767127-7767753_7767843-7767883_7767959-7768320_7768410-7768503	TCONS_00083649	XLOC_028794	database_lncRNA_id:"100576726"	chrLG1	+ 7766174-7767037_7767127-7767753_7767843-7767883_7767959-7768320_7768410-7768503	TTTTATTCCAATTTATAAAGATAAAACTATCTTACTAATAAATAACCTCAAAAGATCGAAACACACCTCGATTTTCATAGAGTTTATTAGCTAACATAGCTCGGTTGCATAATAGTTAGAAACGCATAAAACGCAATTATAAATCCATTTCATAATGCGAACTGTTAGTGCCAGATACAGACGTATACGCGTGTATATTGAAAGTGCAATATGTTCGCGTTAAAACATCCGCTTGCTAAATACGGTATAAGCGTATCTTAGAATCATACCTGGTGATACTGTTGCAGCATTTTAGCTTTGTCGCTGACATCTGAATCGTAATTGCGTACGAAATATTATAGTATACGTATAAGGATTTCCTAATATGGATTAAGCTTATATGGAAAGATAAACTATTCT…
>TCONS_00711369 database_lncRNA_id:"100576729" chrLG5 - 13556575-13557444_13557762-13557814	TCONS_00711369	XLOC_196760	database_lncRNA_id:"100576729"	chrLG5	- 13556575-13557444_13557762-13557814	TTGATCTTCACTACGCCACGTGATTTATGGAGATGCATTGACAACGACAGGACTGACGAAGTCGGATTAACAACAACAGTGGATGTTCCGTGATCCTGATTGGGAATGGTGACTGGTTGGAAAGCAGTCTCGTTTGCGCATCTTTCCACTTTTCTTCCTGTGAAAGGAGAGGCGATGTCATTTCGGTAGCCACGCAAACCTAAGGACTAATATCTGTGTAGCGATTGTGCGGCGATTCGACACGTGCAACTTCCTGCTTCCAACGGAGGGAGAAAAAGAAATACCTCCCAGGTTGAAATTAGTGTGATTCCAGCCGCGATTATCCGTAGACCGTGGGGATAAGCTACTGGTGCTTTTTCCCCGATCGGGGGAACCACTTGGCTAGGAGGGACCACCTAG…
>TCONS_00012313 database_lncRNA_id:"100576732" GL630374.1 - 77435-77990_79335-79399	TCONS_00012313	XLOC_004193	database_lncRNA_id:"100576732"	GL630374.1	- 77435-77990_79335-79399	TATAGATTGTGAATTAAGTGGATACAACATATCGATCAGTTCAAGTTTGAATTCGGAATTCGAAGACAATTAAAGACAAAGTCCATATGCCATGATGATCCACTGTGACTAGAGTTCGAAATTCGAGGATTGTGGTTCTTGATGATGTGATAGTTCTTGCAGTTTTGATGTTCTTGTTGTTCTGTTTTTGCATTCTCACGGTATTCTTACAATTCTGTGTTTTTTATAATTCTTCAGATTTTGTAGTTCTGACAAACTTTTAAAGGTTTTACCCCAGATTAATATCCTCTGAAGTTCCTGTTATGTTCCACTTGTGAGTTTGCAGATCTTCAATGGGATATACAAGTATCCAATGAAGATCAATCTTCTGATTGAGCACCCCGGATCAGAAAGAGTTAC…
>TCONS_00256800 database_lncRNA_id:"100576750" chrLG10 - 9544636-9544779_9545078-9545230_9545391-9545606_9545746-9546414_9548395-9549106	TCONS_00256800	XLOC_066374	database_lncRNA_id:"100576750"	chrLG10	- 9544636-9544779_9545078-9545230_9545391-9545606_9545746-9546414_9548395-9549106	CTAATATAGAAAGAGAACATCTTGCATATATTAGTTTCTTTTCTAAAAAAAGAGATGCTTGTTTCGCAAGCATGGTAACAGGTGGCGACAGGTCAGATGAATGTTCATGAATGCACACTAGCCATGACATAAGATTCTAAGTTATTCTAATTTACTCTGACGAAAAAAAAAAAAGGAAATTTTTATTTCTTCTCAGAAATAAATTTATTTATTCGTTATCTTTACAAATTGCGCGTGGAAGGATTTGTTTGTTTATTTATCTCGATTCGCATAGCGACTTTAAAGGTTATAAAGCCCGACGTAAATACGAGTGTACAGATGTCCAACCTAACCTATGGTCAGTGGCATGAAGTCACGTAGCCACTCGGTGTCAAAGGTTTGTTGAATTCTAGGCACAGA…
>TCONS_00054387 database_lncRNA_id:"100576752" GL631112.1 - 210-780_888-931_1022-1128_2315-2408	TCONS_00054387	XLOC_017237	database_lncRNA_id:"100576752"	GL631112.1	- 210-780_888-931_1022-1128_2315-2408	TTTCAATTGAAAAATTTCAATTTCTCGAATTATTACACATACATAATTTTTCCCGTAAGAAAAACCTTCCTATCGACTGTAGGTGGGTTCATTGGTTATATTATAGGTTATATTCTTAAAGTCGTTAAACTTGAGCATTTAAACAATCATCTCCAAAACTAAAAATAGAGAATATTGAAGAAAAGAAAGAATCTCAAAATCAAAAAAAATGATGAAACTCTCTTAGTTATCTAATAAAAAAAGAGAGTTTCGTTTGATATATGAAGAAGAATAATAGTTATGTACAAGAGATTGGTTGCGTTTGAAAAGAAAGAATAAATAGAGAAAAGTTTTCGATATATCGTAATTTCGTATCGTTGGTCGAACGACTGGAAATCTATAGAAGATGGATAAATGGCC…
>TCONS_00849668 database_lncRNA_id:"100576755" chrLG7 - 1858278-1858589_1860799-1860856_1861295-1861351_1861457-1861513_1861623-1861679_1861792-1862014_1862132-1862435_1862638-1863220	TCONS_00849668	XLOC_226581	database_lncRNA_id:"100576755"	chrLG7	- 1858278-1858589_1860799-1860856_1861295-1861351_1861457-1861513_1861623-1861679_1861792-1862014_1862132-1862435_1862638-1863220	GAAAAATTAAAAATTGTATAGTAATTTTTAACTATGCAAGAAATTGGTGTTCCTAACCTCATTCAGAGAGATTCATTTTCTCGGATATCTCTTAGGCAACAATATTGCGACAGAAAAAAAAAAGAAAAGAAGATTAAACGTCATGCATTTTCCTTCACGCTAAATACGAGAATTAAATTCATAACCGCAATTCCATTCGTGATATTTGACGGAACTAATGTGGTGGAACGATGGATTGACGCGTGTAATTAGAAAGCACATACGCGCATTTACGCGGAATCGGTGCGTTTGTTTTGCAATTAGCGAGTTGCAAGTAGGTCTTGAACAATTGAATTGCAACGTTCACTCATCCTTAGTTTTTCTTATGGATCAATGAGATAACTAGCTTTGATAACGATG…
>TCONS_00256795 database_lncRNA_id:"100576772" chrLG10 - 9513088-9513782_9513874-9514164_9514613-9515408_9517642-9518052	TCONS_00256795	XLOC_066360	database_lncRNA_id:"100576772"	chrLG10	- 9513088-9513782_9513874-9514164_9514613-9515408_9517642-9518052	CCACTATTCAGTATTACCAAATCATTATTCTTCAATTTCATATATCCCAATAAAATAAAATTAACCGTATATTTAGACTAATTTTCATGTTAATCTCTCATCAATTCGTTAATTGACACACGAAAACAAAACATTTACTTTTGATGTGGCTACTAATGGTACAACCTTTTAGTAAAACAAAGCTTTGTATCATTCTCTTTGTTATACATTGAAAAATGGAATCAGTGTAATTAGTGTGTATTTTCTCTTCTGTCAGTGTCAATCACGAAATCGAAAAAAATAACTATAAAAAATAACTATAATAAGACAAATTATTCTTTTCATTTGCAATTAATCGAAACAAAAGTGTAGTTGGTCGAATCTTTGTGCACAGTGATTTTCTTCAATCGATATCGAGAA…
>TCONS_00322793 database_lncRNA_id:"100576807" chrLG12 + 11327351-11329034_11329121-11329289_11329375-11329768	TCONS_00322793	XLOC_090050	database_lncRNA_id:"100576807"	chrLG12	+ 11327351-11329034_11329121-11329289_11329375-11329768	CGCGAGTAGAAAAAAATGTAATTAAATTTCGATAACACTGTTTAAATCGAAACTTTTGAAGTTTACTTATCTAATGTAACAAGTAATACTACGGGTTATTGTGAAAGTTTAGAAGGCTACGTGATTTGTGAATGAGATTCACAATATTATCTCTTAAATATATCCGAGAAATAAATTCTTATGATAAATTCATGATTAAATTTTTAGAAATAAATCTGCATATATCAAGCATAGAAAATCAGATAAAAATTTAATGTATTCGGAAATTCCAATTTTTCATGTAGAATTAGAATTTTTGAAATTCTCGAATTCTAAAACGATAAATCATGTACAATTTACGTATTCCATCCGGATTCGTTAATCACAATTTTATTTTCTATAATGTCGGAAATATATTTA…
>TCONS_00535456 database_lncRNA_id:"100576808" chrLG2 - 13114167-13114667_13114884-13114977_13115080-13115369	TCONS_00535456	XLOC_152763	database_lncRNA_id:"100576808"	chrLG2	- 13114167-13114667_13114884-13114977_13115080-13115369	TGTGTCAGCAATTTCGTCTGTCCAAATTGTCAAAATGAATGGTATAACCTGAATCGAATTTTCCTTACAATTTTCCGTCCACGATATTCCATCACAAAGAATGTTAGAGACAATATCTGAAGAACATAAAAGTGGCAGTGTTCGAAAAAATAATGTTCGATTTGATAGAATTTTTCTACTCTTTGATAAAATTGCTCATCTTTGTGATAGTCGAATGCTTATTCTCGATATACACGTGCATTATTCGAATAATTTTCATACAATTAACGGGAGAAAAATCATTGCAATGGACTCAACGTTTTCTAATCTACTATTTATCTAAATACTTCCTTGTAAACTGAATAAGGACAAAAAGGAAACGTAATGCTATTATCTCGGTACACGTTCATTTTCTACATT…
>TCONS_00983581 database_lncRNA_id:"100576813" chrLG9 + 2924937-2925402_2925487-2925628	TCONS_00983581	XLOC_247285	database_lncRNA_id:"100576813"	chrLG9	+ 2924937-2925402_2925487-2925628	GGACCACGCTTCTCCTCCCTCTGATCGCCGATTCGTTTGAAGCTCCTTTCAATGGACGTTCCAGGCTAGATACACAAACGCGGCAGGAACTTTCCTACGGGGGAGCCGTACGGAATCATTGGAAATCGATAACTTGGAAAAGTTAAATGATAAGCTGCACTTGCGTGATTGACGGTTGCCTCGAAACCACCGCATGAATCATAGTATCGGCCGAAACGGTTTAATGACGTGGAATTTCACTCTTTCCCCTATATATTTTTCCTCCCGGGATACGACGTCGTTAGCGACCCCTAACCTCCACGTTCTAACGAGATCTCGATGCGCAAATCGATCCGGTGTTTAACAATGTTTAACACGGCTATCGTGTCGCGGCGGATTGATTCGAAGAAACAAGATTTC…
>TCONS_00368201 database_lncRNA_id:"100576825" chrLG12 - 11337877-11339690_11339779-11339943	TCONS_00368201	XLOC_095937	database_lncRNA_id:"100576825"	chrLG12	- 11337877-11339690_11339779-11339943	GGACACTGCTTGTAAGGATGTGCGAGCGAAACGATTGATCAATGTATTATCGCAATCGCTCCTCTTTCATCGCCTGGAATGGATTTAAATTCCTCGCGATCAAACGATCAAAGGTCTATCCATTGCAAATTATCCGACACGCAGACTTGGACACGTGTACACATTATATTCGCTATTCGTGTGACAAGTAGTAGTGTTTGCCAGTTCACGTCTCGTAACGTTCACGTCTCGACGCATCTCGTTGTTAAACGAGAGGAACGAATGAATAATCAAGGAATAAAAATCATCAAACGACGGGATTCTCTCGAGGAATCGATTTGTCTACAAATGATTCTCGCTTGTCATGAAGAAGTATTGAAAGTGATCGAGTGATCGAAAGTGACGACGAGAGAAGGTATT…
>TCONS_00616292 database_lncRNA_id:"100576853" chrLG3 - 2868661-2873136_2873500-2873977_2874316-2874946	TCONS_00616292	XLOC_162952	database_lncRNA_id:"100576853"	chrLG3	- 2868661-2873136_2873500-2873977_2874316-2874946	AGAAGATAGATAATTAAATTTGTACACGATCCAATATTCGAATTCAAGATGACGTTTTTCATTAATTCATCGTATTCATTCATTGACGAAAGCCATAGTGATTCGGTTGATCCGGCGGGAGACCGGAAGTCGAAACTATTACGACCGGTTTCGAGAGATTGGCCGCTTATCCGGCGCAATTACATTGTAACCGGCTCATCACACGGTGGTTGTTACGAAACTCATCCTTTTCCAACCTATAATGGACGATCCAATATTTCGTTGAGTCGATAATTCTTCGAAACTATTCGATCTTCTTTTCTCGCATACGATCGAGAAATAAATCTCGACGTGATATTCACATAAAGTTTCAAGTTTGTCCGTGGAATCTATGCATTCCACTCGAGCCATTAACACGAA…
>TCONS_00819901 database_lncRNA_id:"100576868" chrLG6 - 9524517-9524810_9527194-9527513_9527570-9527996_9528498-9528650	TCONS_00819901	XLOC_212996	database_lncRNA_id:"100576868"	chrLG6	- 9524517-9524810_9527194-9527513_9527570-9527996_9528498-9528650	GGATAATGGATACGTTAAAAGATGTTCCGAATATTTGACGATGAATTAAATATCTAATGGTATTGAGGCGTAATAGTGGAATCATGGGAAATTGCAATGATGGATAGGGAGAAATAGTTGGAAAAGTGCATCTTGAGCAATCGGAGATTAAATAAACTAATCAGTGAGGAGAAGTGATATTGGAAGAATTTTTAAAAAATTTAAATTTGAATACCAAACATTCATAATACATTATTGCCAATCAACGAATTTCAATAATCGTGTTTTCAAATAGAATTCCACGATGTATCAACGTGAAGAATACTCTTGGATACCAGAAGAAATTATTCACGTAGACGAAGAGATCTCTTTCATTCTCTGACACACGTGTTCAGGTATATACACAAAACAGGTATCCAA…
>TCONS_00900843 database_lncRNA_id:"100576880" chrLG8 - 8908607-8909248_8909361-8909499_8910953-8911006	TCONS_00900843	XLOC_242453	database_lncRNA_id:"100576880"	chrLG8	- 8908607-8909248_8909361-8909499_8910953-8911006	CGAACAAGCAGTCTGCTTTGTACTGTGGTGTAAGCATGTGTGATTTTATATAGTAGTTTTCATGATGGAGAGCTGTTTTCGAACACTTCGGCCAAATTCTGTTTAAATCATTGAACCAAAGGAAAAGATGGGGAGATATATCAGCGGCGCGAGAACCTGCAGAAGTACCTCTAATTATATTCCAATACATTATAAGATTTCGTCTATTGAAGAAATCAACGATTCACAATTTATTACAACATAATGCAAGCATGTGAATTATAGAATTAACAGAAGAGATAATTCCATTTTTCTTATTATATTTTCATTATGTGAAAATATAATAATTTTTATCTTTACTATCATTAATACCCCATCGTTTTTGATTCCGATTCTGAAGAATAGAAAGTAGGGACAACC…
>TCONS_00279273 database_lncRNA_id:"100576913" chrLG11 - 8352795-8353060_8353335-8353728	TCONS_00279273	XLOC_079946	database_lncRNA_id:"100576913"	chrLG11	- 8352795-8353060_8353335-8353728	CTTGTTCACCCATTCCAGTGTGAATTGAACAGTGTCGCTGTTACCATCGGCAAGTCGAACAATAAACGTTTAGTGCTACGGTTTGCGCGATTTCAACTTAACAGCAAAATTACTTACGATTGTTAACAGTTGTAATTAGTGGAATTATAGTGTTATATGTTCGTTGGAGGAAGATTTATCGTAATACGAGCGATAATTTCACTTAACATCCGCTGCGATGAATCGAATTAAAGTGGGATTTTCTTATCTTCCTTCATTCTAAACTTGTGTGCGCGATAGTACGAGAAGGCTGATAGAAAATCGAGATTATGCGTGGCATTGATACTATTCGTGAGAGTCGTACAAATGTGTGTGTACATATATATATATAATTCGCATGGCTCGTACGTAAAAGATTTT…
>TCONS_00271653 database_lncRNA_id:"100576927" chrLG11 + 12026704-12026803_12038960-12042372	TCONS_00271653	XLOC_075274	database_lncRNA_id:"100576927"	chrLG11	+ 12026704-12026803_12038960-12042372	CACGTGTACAAACGACGCGGCCAATTCGGGGAACCAGTCGTCGGTTGGCTTCGCAATCTAGCTTGTACAAGATATAATTCTCCTTTTGGCAAATTTTGTCTTAAGCTTGGTGCGGTTTTTCTACACTCTGGAACGTTTGGGACGAATCGGAAGGAAGAATTGTTGGAACGGAATGGAAGGGACCGTTGACAGAGAGGAACGGTGGAACGGGGAAGGAAGAGGATTCGAGAAGAGCCGTGGCAATGAACTCGGGAGTTTCACAGGTGGCGCGTCGATCGCGCATGCGTAATTCACGCACGTTCCTACCGGTAATGTAATTCTCGATGATGCGTATGGGCGAGCGTTGCGGAATTTCGAGAGAGTTAACGCACCTCTCAGGGGGGACACTCTCGAAAAACT…
>TCONS_00676693 database_lncRNA_id:"100576929" chrLG4 - 11794032-11794423_11794682-11795030_11795113-11795315_11795383-11795438	TCONS_00676693	XLOC_181028	database_lncRNA_id:"100576929"	chrLG4	- 11794032-11794423_11794682-11795030_11795113-11795315_11795383-11795438	CCGACATGTGACAATCGAGAATAAAAGTCAAAAGCGTTACGACCGAATATTATAAATAACTTTAACGAACATGAAATTGATGTGACTCCGTTGTGATTTCGCGAGGAGATAAAAAAAGAGTTGCAAACATGTGATTTCACGAGAAGATAAAATAAGCAGACATGTTGCACAACTAATGAAACGAAATACGTACACCTCAAAAAACAATGATGAAAAAAAGAAGAATATCCTTATATAATTATACAAACAGGAAATTAAGATTTTAAAACTTTAGCAGAAATAAATAAAATAAGACAAAATATGCCCAGGGAATGCGTGGAAATAATAGAAAGAAGAAAATTGATATATGACATATATGGAAACAAAAGAAAGATGTTATCGAAGAAATTAATACAGCAA…
>TCONS_00676694 database_lncRNA_id:"100576929" chrLG4 - 11794032-11794423_11794682-11795015_11795113-11795315_11795383-11795438	TCONS_00676694	XLOC_181028	database_lncRNA_id:"100576929"	chrLG4	- 11794032-11794423_11794682-11795015_11795113-11795315_11795383-11795438	CCGACATGTGACAATCGAGAATAAAAGTCAAAAGCGTTACGACCGAATATTATAAATAACTTTAACGAACATGAAATTGATGTGACTCCGTTGTGATTTCGCGAGGAGATAAAAAAAGAGTTGCAAACATGTGATTTCACGAGAAGATAAAATAAGCAGACATGTTGCACAACTAATGAAACGAAATACGTACACCTCAAAAAACAATGATGAAAAAAAGAAGAATATCCTTATATAATTATACAAACAGGAAATTAAGCAGAAATAAATAAAATAAGACAAAATATGCCCAGGGAATGCGTGGAAATAATAGAAAGAAGAAAATTGATATATGACATATATGGAAACAAAAGAAAGATGTTATCGAAGAAATTAATACAGCAATGAAAAGCTTGAAAG…
>TCONS_00680209 database_lncRNA_id:"100576929" chrLG4 - 11794309-11794423_11794682-11795315_11795383-11795430	TCONS_00680209	XLOC_181028	database_lncRNA_id:"100576929"	chrLG4	- 11794309-11794423_11794682-11795315_11795383-11795430	TGACAATCGAGAATAAAAGTCAAAAGCGTTACGACCGAATATTATAAATAACTTTAACGAACATGAAATTGATGTGACTCCGTTGTGATTTCGCGAGGAGATAAAAAAAGAGTTGCAAACATGTGATTTCACGAGAAGATAAAATAAGCAGACATGTTGCACAACTAATGAAACGAAATACGTACACCTCAAAAAACAATGATGAAAAAAAGAAGAATATCCTTATATAATTATACAAACAGGAAATTAAGGTAAATGATGAATTGTAAAAATTATTACGATTTGGAATAAAAAATAAATGCATCTTTTTTTTTGATTTCAAATTAAAATCAGATTTTAAAACTTTAGCAGAAATAAATAAAATAAGACAAAATATGCCCAGGGAATGCGTGGAAATAA…
>TCONS_00655666 database_lncRNA_id:"100576933" chrLG4 - 1690568-1696877_1696951-1697761_1704776-1704888_1705118-1705131_1705397-1706783	TCONS_00655666	XLOC_175602	database_lncRNA_id:"100576933"	chrLG4	- 1690568-1696877_1696951-1697761_1704776-1704888_1705118-1705131_1705397-1706783	AAAAAATATTCCCATCTGTCACGTGTTTCGTCACCAGTCGCTCGTATCAGCGAGAGGGAAAGAGTATTCGTGGAAAATATTTGCGTGGCGAGATATTAATATTGTAGTAATGGAAGGATGCAGAGAATGATGAAAAATCTGATTCTAATGGCAAGAAACGTACGATCTGTTGTGATAGAGAAGGTGTATAAGAGTGTATGGAACATTGCATCGTTAAAGAATTACAATCAAGATGGTGTCAGAATCAATTGATTTAAAAGGAAGAAACAGTTTATTGATCATGGAATAAGTTTTTCGAACACATTTTGCAAAAATGCAAGAAATATTGTTTCTTGAAATAAGAAAATCTTTTGTACTCAAATTATTCCTTAATTTGATTTAATTCGAATCACACTTTAA…
>TCONS_00701512 database_lncRNA_id:"100576933" chrLG4 - 1683832-1686915_1686979-1687744_1687815-1697761_1704776-1704888_1705118-1706803	TCONS_00701512	XLOC_175602	database_lncRNA_id:"100576933"	chrLG4	- 1683832-1686915_1686979-1687744_1687815-1697761_1704776-1704888_1705118-1706803	AATTGCTCCCTTTTTGCGCGAAAAAATATTCCCATCTGTCACGTGTTTCGTCACCAGTCGCTCGTATCAGCGAGAGGGAAAGAGTATTCGTGGAAAATATTTGCGTGGCGAGATATTAATATTGTAGTAATGGAAGGATGCAGAGAATGATGAAAAATCTGATTCTAATGGCAAGAAACGTACGATCTGTTGTGATAGAGAAGGTGTATAAGAGTGTATGGAACATTGCATCGTTAAAGAATTACAATCAAGATGGTGTCAGAATCAATTGATTTAAAAGGAAGAAACAGTTTATTGATCATGGAATAAGTTTTTCGAACACATTTTGCAAAAATGCAAGAAATATTGTTTCTTGAAATAAGAAAATCTTTTGTACTCAAATTATTCCTTAATTTGATT…
>TCONS_00438266 database_lncRNA_id:"100576969" chrLG14 - 3951308-3951791_3961109-3961168_3968954-3971234	TCONS_00438266	XLOC_118453	database_lncRNA_id:"100576969"	chrLG14	- 3951308-3951791_3961109-3961168_3968954-3971234	AAAATTTATTTTTACTCGTTTCTTCCCAATCTCTCTTCTCAACAAACTACTTCCAATACTTTTCGATATTACTTCATTTCCAATTTTATATACTCTCTTTACACTTTACATCTACATTTCCATCGTGCACGAACAAGAAGAAGAAAAAATAAGAATATCAATCACAGGCACAGAATTTCCCTCTCGAAACTCGAACGAGACTCGAAACTCTTCCACGCCGTGTTTCCCTCATCCATGACTGGGACTGAGTCGAGTCGTGGAAGCAACGCGTGGAGGAAAATCATGTCCCGGCATGCGGCAGCAATTCGTACGGGCCGCCATATTTCAGTTAAAGCGCGCGGGGGTGGCGTTCAATGCCTCCGCTCCGCGTTGCCATGGCAATTAATTACCTTCATCCCT…
>TCONS_00884820 database_lncRNA_id:"100576987" chrLG7 + 12371799-12372044_12372312-12372395_12372695-12372925_12372992-12373263_12373407-12373895	TCONS_00884820	XLOC_225248	database_lncRNA_id:"100576987"	chrLG7	+ 12371799-12372044_12372312-12372395_12372695-12372925_12372992-12373263_12373407-12373895	ATAAAGTAAAATTTTTACGAGGCAATCATGAAAATAACATTTGGTTTTATACGAATTCCAGACATGGTACATTTGTATTTAGTTCACAAACATGACAAAGCAACAGAGAAAAAGAAAAAGCAAGTTCTATGCATTTACGTGATTATTTCGAGAAGTTGAGTCGCCGAGACGCGTCCGTGTCACTGATGGATCTCACTAACGAGCACAACTGATGATTGACAAAATATTCTCAGTGTGAGACCGAATTTAGAGTTAAAAGGAAAAATTTTAAGAAATGGACAATAGAAAAAAGAAGTCAGCATTCTTCGCGCTCGGAAGGTGTTGAAGTAGGATAGAAAGAAGTATGAAAATTTTTACATTACGACAATGGGACAGAAACATTCTCATGTTTGTGAGATC…
>TCONS_00283601 database_lncRNA_id:"100577012" chrLG11 - 5630685-5631008_5661042-5661089_5736500-5736571_5811523-5811569	TCONS_00283601	XLOC_078630	database_lncRNA_id:"100577012"	chrLG11	- 5630685-5631008_5661042-5661089_5736500-5736571_5811523-5811569	GGAACGTGAAAGAATATATTTACGAGAATAAAATGCAGTGAATTTCGATTTACATAGGGGATGTGATGTTAGCAGAGGAGAGGAAGAGCACGACGAGAGACTGCGCAGTTTCAAAAACGGGGAACGTAGGGGAACGGAAGGAGCGTAGATGAGTTCTGCTGTCCCCGGTGGAAGCGTTAGCGGGATATCGAGGGCCGTTTTCGATTTTTAAATGGAAGGCTTTCAGGCTGGATTGAACGGTACACGACACAAGGTACGTACGCCTCGAAATTTCACCAGATTCCATCAAATTTTTATTCCATCGAATTTTTATCTCAAGGGGGGGTCTCGATGCAGATCGAAAACCGTTTAAAAACCGTGATGGCCGTTACGGATATCGAAGAAATCGTCCCCAAGGTG…
>TCONS_00370974 database_lncRNA_id:"100577013" chrLG13 + 6212701-6214471_6215924-6216057	TCONS_00370974	XLOC_102963	database_lncRNA_id:"100577013"	chrLG13	+ 6212701-6214471_6215924-6216057	GCTAGAGTGGAGTTTGAATGGACTTTTCTACGAACGTACAATGAAATAAATCGTGCGAGGAAAATCGGATTTCTGCGGATTTTGAATCGAGAATTGTTGCAAATAGTTTATGAATTATGTATCTTCTTTTGAATCATTGTTATCGAGAGTGATTCAGTGGAAATCGCATCCTGTACCACCCGGGCATCCATCGGGATTAAGATCAACGACACCTGACCCGTCGTCGAACACCGGAAGAGGAAGTCCATCGACCCATCGGCCACGAAAAAGAGGACCCCTTGTCATTCACTCGTGAAACACGTGTGCGCGAGCCATTAAAGCGTAAAACACGTGCGAGGATCTCTAGTAAATCTGAGAATTTTGTAGATCTTCCAAGGATAACCGAAATATCTCTCTCTC…
>TCONS_00530997 database_lncRNA_id:"100577032" chrLG2 + 12838393-12839402_12847556-12847655_12848305-12848404_12848660-12848818_12848891-12849138_12849966-12850005	TCONS_00530997	XLOC_145617	database_lncRNA_id:"100577032"	chrLG2	+ 12838393-12839402_12847556-12847655_12848305-12848404_12848660-12848818_12848891-12849138_12849966-12850005	CGTGGAAGATTGTTCGATCAACCGTGAACGTGAACTCGTAGAATAAACATGGTTATTTATTAGTGAATAAGTGAAAAACGGATTACGTAATTACGCGTAACCTCGTGGAAATTTTATCGCCAATTCTAATTTCCGATTGGCCGATTCCCAATCTTCTTTAATCTCGCAATATGGCTTACTTACATTTTCCTCTAATAAATTATATATTAATTATACACCTTTTCTGCAAAGATTAGATTATCTCTATCCGCGAATCTTTCTTCTTCACCTACCTCAAAACCGTCCACTTATCAGCTGCTTACATAACGAGTCAAAAGTATTGTCATTTTTCAAACGACAAATCGTAAAATAGCGGTGTCGATCAGAATCACGATACGAGAATCCCCCACTCCTATATCG…
>TCONS_00746856 database_lncRNA_id:"100577042" chrLG5 - 11066377-11066747_11066835-11067344_11067443-11067626_11067736-11068616	TCONS_00746856	XLOC_195860	database_lncRNA_id:"100577042"	chrLG5	- 11066377-11066747_11066835-11067344_11067443-11067626_11067736-11068616	GTCAGATCCTTTCTAGTCTATTCGCCACACTGCCTCGATATATCGATACTATCGAAACGGTCGGTAATCGGCATGGTCACGGAACCACGTTATCCATCGATTAACCGACGAGAGATAGAAGCGGAAAATCGATTAATCGAGATGCGAATAGATGCGGAGGTATAATCGATTAATTGGAATAGAACTAGATAGGTTAGAATAATAACAGTTAACGTTGCAACGTGCTTTGAACGAATTGAATGTTTTTGCTTGTGTTTTAAATTGTATTGGTGTACTAATATATTTACCTGGAATATATAAAATGATTCATTTAACCTCAAATTTTTCTTTGGATATTTTATACTAATTCTTGTATATTCTGCATTATCTATAGATTTTTGTACATTTAAATTTTCCATA…
>TCONS_00830840 database_lncRNA_id:"100577063" chrLG6 - 3886370-3886930_3888943-3889362_3889640-3889833_3891721-3892022	TCONS_00830840	XLOC_210558	database_lncRNA_id:"100577063"	chrLG6	- 3886370-3886930_3888943-3889362_3889640-3889833_3891721-3892022	CGTATCAGAAAAAAAAAAAATTCTAAATCATCCAAGGTCGACATCTCTCACTTTCAATTTCCTCCAAGAGGACTCTCCACATCGACCAATCTAATCAAAAGGGGGGGAGAAAGGAACGTGAAGTACCGCAAATACTCGAACGACGAGGAGAGATGGAGCGGGTGTAACGCGAATTTTCTAATCGAAATAATATTCCGAGGCCACAGCAAGTTGGCCACCCCGAGAAACGCCACATCCGAACGACGAAGATTGCTGAACGTCAGAAGCGACCCCAGGATGGGAAAGGAAGAGGAGAGAGAAGGGAATGAAGCTTGCTCGTTGGAGAAAATTAATTAAGATTAATTTGAAGAAGATATCATTCTTCCCAAGAATTCTTAATTTGCTCATTATGAACATCAT…
>TCONS_00181739 database_lncRNA_id:"100577074" chrLG1 + 21813027-21813116_21814096-21814452_21814562-21814743_21815357-21815854_21815967-21816204	TCONS_00181739	XLOC_034261	database_lncRNA_id:"100577074"	chrLG1	+ 21813027-21813116_21814096-21814452_21814562-21814743_21815357-21815854_21815967-21816204	AACTCTGAGATCTCTAGCCTAGTTCATTATTAGAGAATCTAACTTATCCAAGTTGCGAAGTCCATCGTCACGTACCTATAGCAAATACGAGTGTTATCGCTTCTTTCAACCAGCAAGTTTCGGTCATCTGGAAAGCAAATTAATTGGTTGATTGCTCGAGAGAATGTATTTATTCTGAAGAAATTTGAAAATATGAATTTTAAATGTTCAAGATTTCAAAAATTCGAAAATTTAAATCAAAGAAAAAGAAAAAAAAATGTAAACATTACGATTATATTCAAGCAACAAACGTAACGAATATATAGCGCGATATTAATTGAATTCGAATTATCGATGAAGTAAGCAAAAAAAAAAAAAAAAATAGAATCTAAACAATAGAATATAAACAAAAAGTGAGAT…
>TCONS_00765710 database_lncRNA_id:"100577104" chrLG5 - 11199753-11200244_11200300-11200534_11200642-11200788_11200859-11201218_11201345-11204480_11204560-11205751_11205822-11205942	TCONS_00765710	XLOC_195950	database_lncRNA_id:"100577104"	chrLG5	- 11199753-11200244_11200300-11200534_11200642-11200788_11200859-11201218_11201345-11204480_11204560-11205751_11205822-11205942	AAAACATATTAGTCCGAATAGCTTGATTGATGTCTCTTGTGTCCATATCACATTACTATTACAAGGATTGATGTACATTTTAAATCTAATATATTACGTAGCGATAGATATTAATAAATAGTTTGTGATTTTATAAAAACTGTTCATTAAATCATAAACGGAGAGGTAATGAAATAAATACCACCATCAATTGAATATAGCAAGAACTTTATAAAAGACGAGGCAGACTCACAGATGGTTTAAGTATATTAGTATATGTCTCAAAACTCTGAGAAACGTATGACGGTTTTGTATTCGCATTTTTTTTATTCTTTTTTAAAATTTTTTTTTTTTTCTTTCAAATAGATCACACATGAAAAAAAGTTGTTGCATAAAGAGATGTGTTTATATCGTGCGTAA…
>TCONS_00035353 database_lncRNA_id:"100577109" GL630489.1 - 5951-8908_9917-10122_10259-10441_10657-11016	TCONS_00035353	XLOC_011704	database_lncRNA_id:"100577109"	GL630489.1	- 5951-8908_9917-10122_10259-10441_10657-11016	GTGTTTCAATGTTTTAAAATTAAGACGTTCTCTTCTATCACTGTTCTAATATTATACTCAGCAATGGATTCGATTTTGCTACAAATATCGGTTTTAAATTTAATTTATAACTAATTTTAATCTAAGTATGTTATTTATAGCTAGTTAGATCTTATTTGAATTCAGAGCCAGGATTCTGAGAAGAGAACTTTAAAAAGAAATGTAAATGTCTTGCGATGAACAAGCCAGGTGATGAATTTTCCTTTAAATAAAAAAAAAAGAAGTTAAAAAAAAATATTCAGAAATTGATAAATCAAATAATATAAATATTTATAATTTGAATTACATTTTGAAATCGATTATTTGACTGAACTTGATATGAAATTTCAGATAAGAATGCAGATCTAAATTTGTAAATTA…
>TCONS_00597640 database_lncRNA_id:"100577125" chrLG2 + 6652318-6652789_6652935-6655780_6655892-6656329_6659651-6665332	TCONS_00597640	XLOC_142576	database_lncRNA_id:"100577125"	chrLG2	+ 6652318-6652789_6652935-6655780_6655892-6656329_6659651-6665332	CAGTATGAATTGTGAATCGTATAAATTGGATAAAATAAAATTCACAGCCAAGATATGAAACGAGATAGGAGGTTAAATGGTTTAACTTGAATTAGTCACGCGTGGTACGGCGACTCGGTTAGTAAACAAGGATTAAATAACAAAAAGAAGCCACGTAGTCATTTTCCTAGAACGGAGCGTATTTTTGTCTTCGTTCTGTGTGTATACACCAAGCTTATGCGACACATTCGTTACGCCTATCGTTACGATCTCAAGAAGTCTGTTTAATTTCACGTTCATTAGTCACGAGGAGGTATCCGGTGAAGAACGAGGCGTGCCTAGTTCGTGTGTGCACAATTAAAAACGAAGTTACGTTTAATTAAGATTTCGTTGCATCGACGACAAGAAAAAATTGAAGAA…
>TCONS_00813241 database_lncRNA_id:"100577141" chrLG6 + 16785782-16786385_16786504-16787214_16787311-16787667_16787755-16787822_16787921-16788418	TCONS_00813241	XLOC_207895	database_lncRNA_id:"100577141"	chrLG6	+ 16785782-16786385_16786504-16787214_16787311-16787667_16787755-16787822_16787921-16788418	GCGTTGTCGAATGCAAACAGTCGATTAAAGGTCGTTGCCCATCCAATAATAGAAGGGCATCGAACCACGATCCAATAAATATTACAAATATTTCAATCTATTGATTTTAATTTTCTTTTCCAATTCAATTTTCATTTTTAAAATTTTATTTAAATTGTTATTTAAAATGCAATTATTGTGTTTAAAATTGTAAAACGCTATTGTTAATTTATTAATTTCAGTGTTGGACCAAGCATCAAGTAAGAACTATAAACAACGAATCTTTATCATTACATATTAATCAATTATAATCTAAAATTCATCGATAACAAACATTCTGATCGGAGATGAAAGAAGGTAAGAGGAAAATGATGAAGAAACGTAGGAAACTTTAAGAACCATAAACAACGAATCTTTATC…
>TCONS_00823708 database_lncRNA_id:"100577141" chrLG6 + 16784115-16784680_16784775-16787214_16787311-16787667_16787755-16787822_16787921-16788418	TCONS_00823708	XLOC_207895	database_lncRNA_id:"100577141"	chrLG6	+ 16784115-16784680_16784775-16787214_16787311-16787667_16787755-16787822_16787921-16788418	AAAATTTCATTAAAATCGGCGTATATCGATGTTCCCTTGTTAATTAATGATTCAATATTTTCAGAGTTTCGTTTGATATATGAAGAAGAATAATAGTTATGTACAAGAGATTGGTTGCGTTTGAAAAGAAAGAATAAATAGAGAAAAGTTTTCGATATATCGTAATTTCGTATCGTTGGTCGAACGACTGGAAATCTATAGAAGATGGATAAATGGCCGATTGGCATTGGAGTTAAGATCAAAAGAGTCATAGCCCAAGGAATTCCCTCGAACGTAGAGTGAAAGAAAAAGATAGAGTATGGTCGAACAGAGAGGAACTGGAATTGTTTGGCTTTCGAATGCAATTGCTTGTCGTAAATCTCGCGGTAAAGTTTGTTGCGAGCTAACCGGACCTCTTCT…
>TCONS_00035583 database_lncRNA_id:"100577144" GL630491.1 - 17845-18069_62224-62581	TCONS_00035583	XLOC_011775	database_lncRNA_id:"100577144"	GL630491.1	- 17845-18069_62224-62581	GGAAGATCCAATATTAATTTCACATATAGTTTTCTCTTTTTTTCTAATCAATTTATAATATTGTATTTTTGATGTATTATGATTAATACATGTTTATTATTTTAGATATCTGATTATTTGAATCAAAATTCGCAAATATTTTAAAAAATTAAATAATTTAGATGTAATACATTCCTTCAAACTGAGGGAATAAAACTGGAATTATTATGAATTCGAACAGTTAGTTGAAGATATCAGATTTATACTTTTCATACTGTTGTTAATTCACATGAATAATAGACTGATAAAGATGAAAAAGAGAAACACCAAAACAAATGATTGAAAACAAAATAATCATCCATCGTGTTTATTAATTCTTCAGAAGAATTGGAATTTTATTGGAGACTTAAACTTAGATTA…
>TCONS_00706027 database_lncRNA_id:"100577164" chrLG5 + 7965423-7965628_7966064-7966354_7967749-7969442	TCONS_00706027	XLOC_188155	database_lncRNA_id:"100577164"	chrLG5	+ 7965423-7965628_7966064-7966354_7967749-7969442	GTTTATATCCGTGGAGCGAAGATTTGTATTGCTGACTCACCTCTGCGTAGCGTGATTGTTGTGTTTATATATAAGACGCGCAAAATCCGAGCACGAGCTTCATTCGTAGTTTCTACGTCGTATCGAGTGGATTCAAATCTGGACGATGGTGACGATGGACGATAATTATCGGCTGCCATTTTTCATCGAAAAAGGGAACATTGAAGCTTTTTGCCTCTCACCATTTCGAACACATAAATAATCGTAGTGGAATCCAATCCCGGAAGGGCAATGTGTCGAACGACACAAACATCCTCGGTGTCATGCAGCGTGAGATTCCTACGGCAGTTTATCTCCCTTCAGCCCGATAGCCAAGGCGCTTCTGTTATCACAGGCCGCGTTGTTGGCAGCATAAATTGA…
>TCONS_00141055 database_lncRNA_id:"100577183" chrLG1 - 9852718-9856826_9856930-9858922_9858997-9862095	TCONS_00141055	XLOC_042918	database_lncRNA_id:"100577183"	chrLG1	- 9852718-9856826_9856930-9858922_9858997-9862095	CTTTTTCGATGCGCTGTATTTTTTGTATATTTGTTTGGATTTGTTTCACGTGGTGGATTATAGGATCGACAAGACGATGGTGCGTGTGTATGCACGAATAATCCAAGCATATTAAAAGTCGAAGGGATCACAATATAAAAAGAAAATAATACAAAAGTATATCCAAAACATTCGTTTCGAATCAATTTTTGCAAATGCATTAGATCAGAGAAAAAAATCAAAGATATTAGATTCGCCCTCCAATAAATTTTATATACATGATTGCAAATATAATTCTCATGTATCAACAACGCTACATATTTTATTGAACACGAATATCGTTTCTTTCCTCCAGGAGTGGAAACACAGTCACAATCTCCGGTCGCCTTTCTAAAACACGTCGGTTTCAGAACCTCGATA…
>TCONS_00019887 database_lncRNA_id:"100577185" GL630399.1 + 3147-3456_3533-3741_3920-4952	TCONS_00019887	XLOC_006685	database_lncRNA_id:"100577185"	GL630399.1	+ 3147-3456_3533-3741_3920-4952	GACAGTGTCAACGCAATTGTCTATACTGCAGTTATCCGCAGTGCAAACGGATCGGTTGAACTGGCTATTTTAAATTTCTTGTCCAGAGAGAAACTATTTAGCCAATAAGCCAGGAAAATTCATCGGAACACTTGCAAGAGCAAACTTTAAAGCGAATGCAAAGCCTTTGCATGTGCACGAGATATATCATATGCTCTACGTAAAGCTTATACGAGAGAATAATAAACAGCATCAAGATTATATGAGAAAGTAGAATGGGCATTTGCAATCCATGTTGACGCAAAGAAAGATGACAACATTCGGATCACAGTGATATGAAAAATAATAGATTATGCTATCACTATATAGTAGATGCATATTCTCATTTGTCCGCTGATGAGAAATTCAGTTATGCACTTA…
>TCONS_00020075 database_lncRNA_id:"100577185" GL630399.1 + 3167-3456_3533-3785_3920-4559	TCONS_00020075	XLOC_006685	database_lncRNA_id:"100577185"	GL630399.1	+ 3167-3456_3533-3785_3920-4559	CTATACTGCAGTTATCCGCAGTGCAAACGGATCGGTTGAACTGGCTATTTTAAATTTCTTGTCCAGAGAGAAACTATTTAGCCAATAAGCCAGGAAAATTCATCGGAACACTTGCAAGAGCAAACTTTAAAGCGAATGCAAAGCCTTTGCATGTGCACGAGATATATCATATGCTCTACGTAAAGCTTATACGAGAGAATAATAAACAGCATCAAGATTATATGAGAAAGTAGAATGGGCATTTGCAATCCATGTTGACGCAAAGAAAGATGACAACATTCGGATCACAGTGATATGAAAAATAATAGATTATGCTATCACTATATAGTAGATGCATATTCTCATTTGTCCGCTGATGAGAAATTCAGTTATGCACTTAAATTAAATACCGATATATGA…
>TCONS_00035667 database_lncRNA_id:"100577186" GL630492.1 + 7105-8492_16734-16984	TCONS_00035667	XLOC_011807	database_lncRNA_id:"100577186"	GL630492.1	+ 7105-8492_16734-16984	CTGGCTTCAGAGATTATATTAGGAAAAAGAAGATGTAAATTTGCAATATTTTAAATTATGGAATATTTGAATAATTTTTTATAGTGGTTGTAAACATTCCTCTTTAAATCGAGTTCACATCCGTACGTCTCTAGATTGATATGTAATATTATCGAAAGAAAGATGTAATTTTGCAATTTTTAAGATCATGAAATTTTTAAATCATTGTATTTCTAACATAGAAGAGATAGATATGATTTTCTGAGGTAAGTGCAAATAGGAAACATTTGAAACGCACTCTCAATCGTTATTGTAAGTCGATAATTTTTGGCAAGTGCAGTGCTGGTTCGTTATCAGAGTCACAAAGTATCGTATGATTTTCCAAGTTGCAGCAATGATATTGTTCGGATTGTTACCTTT…
>TCONS_00260684 database_lncRNA_id:"100577211" chrLG10 - 9323955-9324059_9324155-9324545	TCONS_00260684	XLOC_066242	database_lncRNA_id:"100577211"	chrLG10	- 9323955-9324059_9324155-9324545	AACTCGTCGTTTTATTTCGACGATAAAATAATACACGCGAAAAATTTTTGAATAAAAATGTATCGAAACAAGAATATTCGAAAACGATAAATGAAATTTTGTTACAAGACACAGACTTACGAAAACAATGAATCGTATCGTCGTTCTCGGGACTGGCAGCGGTATAACTGCAAGTGCAAATGCAGAAGAGTTTCCTTTTTGTGTCGCGAATGGTCTCGCAACGACTCTGCCGATCGAGCGCCATACCGATCAAGCAATACAGCTCGTCACCACGCGTTCATCGCGTCGAGTCGACTCAAAGGAAGAGGGTGGATGGAAAGCAGGCTAGTTGGTGAGAAAGGAGGTGGAACAATCGGGCAAATTTCCTCTGCTACGACTGATTATAGCATTGGTTAGATT…
>TCONS_00784798 database_lncRNA_id:"100577215" chrLG6 - 16800358-16801929_16802180-16802462_16802580-16803162	TCONS_00784798	XLOC_216747	database_lncRNA_id:"100577215"	chrLG6	- 16800358-16801929_16802180-16802462_16802580-16803162	CGCGACCATTGAACACGGATCGTCGATCGAGTCGTCTACCAAGAGAGTGGGTCAAGGTGGCCGTCTTCGTGATCTCCTTAGTTCCGCGTTCTACTGGCGGGTTTCGTTCATTCGTTTATTCGGTGAATATGGATAGTGTGTGCATCGACATGTATACACGCGTGTTCCTTCACTTATATGTATGTGCGACACGATTGTATGTAGGTACGGATATAACCTATGTGCCGCGTCATCAACCACTGCGAACCTACACCGTCATCAGAAGCGAAAGATGCTGGCGTCGCCAAATCTTCCCTTTCTCCACCTTCTATACGCGGCGAGAGTAAACGTGACGTCACAAGCTTAAAGCTGCTAGACGAAATGAGAAGAACCGATTGATTCGTCCTTTTCGTTTCGTTT…
>TCONS_00784800 database_lncRNA_id:"100577215" chrLG6 - 16800358-16801459_16801748-16801929_16802180-16803162	TCONS_00784800	XLOC_216747	database_lncRNA_id:"100577215"	chrLG6	- 16800358-16801459_16801748-16801929_16802180-16803162	CGCGACCATTGAACACGGATCGTCGATCGAGTCGTCTACCAAGAGAGTGGGTCAAGGTGGCCGTCTTCGTGATCTCCTTAGTTCCGCGTTCTACTGGCGGGTTTCGTTCATTCGTTTATTCGGTGAATATGGATAGTGTGTGCATCGACATGTATACACGCGTGTTCCTTCACTTATATGTATGTGCGACACGATTGTATGTAGGTACGGATATAACCTATGTGCCGCGTCATCAACCACTGCGAACCTACACCGTCATCAGAAGCGAAAGATGCTGGCGTCGCCAAATCTTCCCTTTCTCCACCTTCTATACGCGGCGAGAGTAAACGTGACGTCACAAGCTTAAAGCTGCTAGACGAAATGAGAAGAACCGATTGATTCGTCCTTTTCGTTTCGTTT…
>TCONS_00798334 database_lncRNA_id:"100577215" chrLG6 - 16801497-16801929_16802180-16802958_16803041-16803168	TCONS_00798334	XLOC_216747	database_lncRNA_id:"100577215"	chrLG6	- 16801497-16801929_16802180-16802958_16803041-16803168	ATTGGACGCGACCATTGAACACGGATCGTCGATCGAGTCGTCTACCAAGAGAGTGGGTCAAGGTGGCCGTCTTCGTGATCTCCTTAGTTCCGCGTTCTACTGGCGGGTTTCGTTCATTCGTTTATTCGGTACGGATATAACCTATGTGCCGCGTCATCAACCACTGCGAACCTACACCGTCATCAGAAGCGAAAGATGCTGGCGTCGCCAAATCTTCCCTTTCTCCACCTTCTATACGCGGCGAGAGTAAACGTGACGTCACAAGCTTAAAGCTGCTAGACGAAATGAGAAGAACCGATTGATTCGTCCTTTTCGTTTCGTTTATCTTCGTACTCTCCTTACTCGAAAGTTGTCTATATAAGTGATGAAGAATCTTGGACTCAATGAAGGAATGAATTA…
>TCONS_00007702 database_lncRNA_id:"100577216" GL630358.1 - 42043-42699_42831-43072_51683-51740	TCONS_00007702	XLOC_002621	database_lncRNA_id:"100577216"	GL630358.1	- 42043-42699_42831-43072_51683-51740	ACTAAACATATATCAAAATTATGACAATTAAAATAATTAAAAGTAATATTGTTAACAGGTGGAAATGGACAATGTGTAAATTATAATGGTCTAATCTCGTGGTTTATGTTTTAAAAACTGTAAATACTGTGATGGAATATTCAAAGAACTTGGTGAAAAAAGAAAATTGTTCAATTGCCATTAATAAATTTGTAATAATTTGTAATGAAATGACAACATTCGTTTCATTAGAATCCATTGTGCATTGTGTTTTCATGTGAAAATGGCGAAGGAAGTTTTGACTCTAGTCTTCTTAAATATTAAAAAATTCATCCAATATGCCTGTCATTGCACACTGCCAACGTACACAGGCAACCATAAGATGTTATGCAGATGCACGACCATTGACTTTAAAGCTAT…
>TCONS_00725264 database_lncRNA_id:"100577230" chrLG5 + 3087212-3087420_3087753-3087835	TCONS_00725264	XLOC_186092	database_lncRNA_id:"100577230"	chrLG5	+ 3087212-3087420_3087753-3087835	CATGATTTTGCCTTTCGTTGGAATGGAAAACAAAAGGCAGAGTCGGCCAGAGAAAAGCCTAGAATAGTGCTGCTCTGCTTGCCATTTGGTGGATATTTTGTGGCTGCCCGTCGCACATCGTCGTCTGCGAGCAATGCTGCGGGCAATGCTGCGGGCAGCGACACTTGACTAACGTTATAGGGGAATGAGGAGTTGAAAATACAGAACAGATTCTCTTTCTCGAGGGAAACGAATGTTTCTATTGCATCGCGCATCACCTGTGGCTACCTGTCACGTTGCCCTACTATACGGC
>TCONS_00320955 database_lncRNA_id:"100577244" chrLG12 + 5324679-5325084_5325282-5325588_5325718-5325894	TCONS_00320955	XLOC_087449	database_lncRNA_id:"100577244"	chrLG12	+ 5324679-5325084_5325282-5325588_5325718-5325894	ATGAGATATTGTTTTTGAAAGAGTTTGTTAAAATTTAACATTATTTTTTTTAAACAAACGCTTGATAGAAAAGAAAAGGAAAATATTAAATCAATATTTTTCTTTTTTCTCCCCCCATCCCAACTTTATTTTCAGGAAATTTGTGACCGCGTGCAATGCGGTCAATAGAGTCAGTGTTTGTTTCGTAATAGTAATTTCAATGTTCTTTAGAGCACGATTGCTCTAACTTAATTTAATTGTAATACATTCGCGAATGTAGAGTCAGTGTTTGTTCGCCGATTGTAATTCGTACGCGTTAATAGTCTTTTATTTTATTTTTTTTTTCTTTTTAAATATTCGTTTCGCGTATATATTAAAGTCAGTGTATATATCAAGAGCATAAGGCGATCATCCATCACG…
>TCONS_00765971 database_lncRNA_id:"100577257" chrLG5 - 13567094-13567094_13567562-13568994	TCONS_00765971	XLOC_196754	database_lncRNA_id:"100577257"	chrLG5	- 13567094-13567094_13567562-13568994	ATTTAACCGAAGAATATGGAAAGGATATAGGAAAATTGAACGCGTCAGGTTGAAAAACACTGGCTAAGAGGGTACTGTACGTAACCGGTAACGCGGCAAGTTCGCACCTCCGCAAAGAGGGTCCATCTCGCGCTCGCCCTACCGCGCAACACCGCTCGTTAAACGAATTAAGTAGTTACGGTTTGTTTAATCGGGGCCACGGAGGCCTGAATTAAGTTGTTATCGCGAATTAGCTGATTATACCGAGGCGGCGCGAGGTGTCGAGTTGATTTGTTGTTGCGAAATATGGCATGAGGTTTGTTTATGCTCGCCACGCCCCACACCCCCTCGCCGACCTTTCAGCTCGTTTACGGCTGACCTTAAATAAGGTGCATAGACCGTTCCATCCATCCATCCACG…
>TCONS_00771111 database_lncRNA_id:"100577259" chrLG6 + 16816739-16817789_16818093-16818495_16819348-16819431_16819537-16819810_16820065-16820748	TCONS_00771111	XLOC_207900	database_lncRNA_id:"100577259"	chrLG6	+ 16816739-16817789_16818093-16818495_16819348-16819431_16819537-16819810_16820065-16820748	TTAAACTAAAAAAAAATATTTTCATATAAATTAAAAAAACACTCGATAACTAATAAAACTAGCTTATCTCATTGAAAGTAACGATTAAACAATCTCCATTCGATATTTCCGCTACTTCATATATTCTTCTCCAAAACTCTGCTTTCAATATTTACGATTACTCAGTCCTACGTAATCCAGGCAATAAATCGAGTCCTCGAGTCCTCCTAAATTCATCGAGATGACGATTCGAATCAGGAGAAGAATCTCCCATCTATAGAACCTCGCGGTGCGACGAAGGGAAACGATGTTGACACGCTATCCGGTGGTCTTTCCGTACCGAAAATCCAGTACGTCTGGGTGGATCTTTCCCGTTGGTTAAGCCGATCATTGTCGCGGTAACAAGCCGGCTATTGACAG…
>TCONS_00137376 database_lncRNA_id:"100577260" chrLG1 + 19364495-19364701_19364827-19364902_19365991-19366066_19387162-19387270_19387326-19387410_19387515-19387797_19389762-19390833	TCONS_00137376	XLOC_033352	database_lncRNA_id:"100577260"	chrLG1	+ 19364495-19364701_19364827-19364902_19365991-19366066_19387162-19387270_19387326-19387410_19387515-19387797_19389762-19390833	TTTCGAACTGTGAAGACGTGTTAAATCGTACTTGTAAAAATTATTTTTATTCTTAATTAATTTATTTATTTATATTAATAATATTTACGGATTAAATATGCGTATAAAATATTTGAACAGTATTTAAAATTTTTTGAGTCACGTAGTGTTCTCTTTCGGCATCCATTATTGTTAATTGCTAAGTGCGTAGTAAGACATCGGTAACAATGTTAGAAGTTCAAGACTTTTGTTTAAAGAATAACGAGAACAATGACCAGACTTCGCGACTCGATCAGTGTCGAAATGTTAGAAGTTCAAGACTTTTGTTTAAAGAATAACGAGAACAATGACCAGACTTCGTGACTCGATCAATGTCGAAAGTGTCAATGAAGTTGAATTATTGAACAGGATACGTATGAA…
>TCONS_00044408 database_lncRNA_id:"100577261" GL630609.1 + 10021-10371_10519-10798_10895-11153	TCONS_00044408	XLOC_014632	database_lncRNA_id:"100577261"	GL630609.1	+ 10021-10371_10519-10798_10895-11153	TCCCTCTAGGCCACTAGAGGGAGACTGACGAAGATGGCACTGCTCTCGCTGTCAACTAAAAAGTTCCTAGCCGAGTAACAAGCAATGGTGGCTCGAAATAAATAATGCGCGTACATCGGTGCACGTGTCCCGTGGGTGCCTTTCGACGAGGGGATGAGTAACGTTCATAGGGACTCGGTGATGAATCGTGGTCGGTTTCACAAAGCGATCACATCGATCCTGGCAAGTGGGACAAGACTGGTGGTTCGAAAATTAAAGCACTGTGAAAAGTCGGTGAAAATGGAAAAAGAAAACGCGATCTTGGCTTCGCTTGGCTCGTACCATACTGAATTTATCCGACACTTTATTACTGTAAAGTACAAAATGAATTAAAGTTAGTGATTTATACATAATTCTAAC…
>TCONS_00846673 database_lncRNA_id:"100577275" chrLG7 + 853640-854033_880213-881110	TCONS_00846673	XLOC_220253	database_lncRNA_id:"100577275"	chrLG7	+ 853640-854033_880213-881110	CAATTTTTACATAGCAAGCATAGAAATATTTAAGAAAGAAAAATGATTGTTTAAAATATATTTACAATAAATTTTATTAACACATTTTCGTTACACATAATATTATCTTTCGTCTTAAATTGTAAACATTTCTTTCCACGTTGAGAAAAATACGCAAATCCGATGTTACTCGACCGATTATCAAAACAAATTCCTCGAACGAACGACACGTTTGTTTGGATACACGTTTGCGACTCGACGCCGTCTGTTCCGGGAAATATATATATTACGGTGTTATTACAAATTACGACGGAATAGTCGGGCCACAGACCTCGCCGTGATCGGATCGATCCTCCTGCCTCCTTCTGCCAAATCTGCTCCGTTTAATCGGATTTCGACATCGATTCCTAACCAGTGGCG…
>TCONS_00780717 database_lncRNA_id:"100577286" chrLG6 + 16808645-16809677_16809935-16810556_16810678-16810850_16810937-16811179_16811364-16812828	TCONS_00780717	XLOC_207898	database_lncRNA_id:"100577286"	chrLG6	+ 16808645-16809677_16809935-16810556_16810678-16810850_16810937-16811179_16811364-16812828	CATCTAGTTATCAATCGATCAAGATGCGAGCGCATAATCTTGTTTAAACGCAAGATCGGCCAATAGTTTCCAATCAGGAACACATACATGAAATCCTAATTCCGGTGGTTTCACACAATTTCGAATGATGCGGAGCAATGCGACTCATCGTTCCTATGCTAACGAGAACGTTCTCAAACCATTGTCCGAATCGGCAGTTCGTAGATCGCAGCCGGCACCGATCGCTTCTTCCCCTCCATCACTTTCCTTTTCCCTGTGTCTTTCGAAGGGGGGTGCGGCGATCGCGCAATAATACTAAAAAGATAAAACCTTCCCTTTGGAAGGGGGTGTCCACCCTTCGAGGAACACGGTCGGCTATTGCTTCGAGGCTAGGTGGCCCATAAGCTGCCAACCTTACGT…
>TCONS_00823713 database_lncRNA_id:"100577286" chrLG6 + 16809964-16810034_16810125-16810556_16810678-16810850_16810937-16811179_16811364-16812449	TCONS_00823713	XLOC_207898	database_lncRNA_id:"100577286"	chrLG6	+ 16809964-16810034_16810125-16810556_16810678-16810850_16810937-16811179_16811364-16812449	GTAATGTCTGAATAACTGTAAAATGGAGATTGAAACGCATCAATTATTTGAGAAAGAAAATATTCCAAGAGAGGAATACGAATTATCATTTTTCATCGATCAACTCAATCCTATTGGATCGTTAGAGAACTGAAGGATTTTATGTTGAGAGACAAAACGAAGAACGTTATAAGCATCCTGAGAGGATGGAAAGAAATCGAAAGAAAGTAGATATACGAGGAACCGTGGTTAGACGAGGTGGAATAATAACAGGCTGGGATATATCAATGGGATTCAATATCGAAATGATCCGATGCCCGTGTCTAAGCATGCGTGCACGCATCGGGGGATCTTCGCGTACATAACTTACATATATGTAACGGCTATAAAGATAGCGTGTATCAGATAGCATAGTCTCGT…
>TCONS_00100112 database_lncRNA_id:"100577291" chrLG1 + 7818598-7820322_7820611-7821178	TCONS_00100112	XLOC_028827	database_lncRNA_id:"100577291"	chrLG1	+ 7818598-7820322_7820611-7821178	GTCAATTTCAAGTAATTTTTGCTGATCGCTGTTCAAATTTCGCGCCATAAACTTTCCTTATCGCTCCCGCTCTGCCCCTCCTCCTCGACGAACGATAATTAAACAGTACCGGTCAATATCCCAAAAGACGCTCTCCTTGCCATTTCGCGGCACAGGAACACGTTCCTTTTTACGCGATATCGACGCGTTCCCCGCAATTATATCCGTCTGAATGGCGGCCGTGTGCTCGCCATCAGGCGTAGGCGGAGCCAACCGATTTTAAACAACTGGCTGTACGCATTAATTAAATCCAGGAGTCTGTGTACTCCCTTGACTCCATACAAGGTGGCCGGTCTTAATTTGGCATTGGCGAAATAGTAACGCTGGTGCTGCTTAACACCAGCCCATTGTCCTGTCCAC…
>TCONS_00222555 database_lncRNA_id:"100577301" chrLG10 - 1695319-1695568_1696571-1696710_1696954-1697535	TCONS_00222555	XLOC_063647	database_lncRNA_id:"100577301"	chrLG10	- 1695319-1695568_1696571-1696710_1696954-1697535	CGCAAAAACCAAAGTTGTAATATAATACATGGTATTTATGGTGTTATAATCGAATATAAACGCACATCCTAATGATTTACGTTTCCATTTACGTTTTGAAAACAAATTCTTATTAGAAGTAAGATTCCTTAGAAACGCGTCAAAAGTAAATATACGCAACAAAAGTAGCTAGTCTGTTATGAAAGATAGTCGGGTAAAGTGGTTTTCTAGAAGCAGTAATTTCTGAACGAGCGTGAATTCGTGTAAATTTTTATTCAGTTGATTAATTTGAGATATTTTAGTGAGTTTTTATTTAGTGAGAAAAAGTGAAATACTTATGATGGATAGATTTCGATATCTAGATATTTTAAGAACAAATTTAATTGGAAATGTTACAAAAATTTAGTTGTTAGATTCGTG…
>TCONS_00605712 database_lncRNA_id:"100577303" chrLG3 - 3019259-3021869_3021943-3022114_3022279-3022945_3023362-3024008_3024191-3024280_3024477-3024532_3024615-3024725_3025979-3026273	TCONS_00605712	XLOC_163006	database_lncRNA_id:"100577303"	chrLG3	- 3019259-3021869_3021943-3022114_3022279-3022945_3023362-3024008_3024191-3024280_3024477-3024532_3024615-3024725_3025979-3026273	CGCCGGTGTGCTCAGCGTCTTCGGTCATTGTAGTCTAGTGTTGGCACGATATAACGAGGGAATGGCGTGTCTTGCTTATAATTGAACCGAGCACCTACAATCCAATCGTTCTTAATCATTCGAATTCATCTCGCTTGCAAGTTCCATTCTCCTTTATTATTCGTTGTCTTACCAACCTGTGAAACTTATCCGAAATTCATATTCTTTTTTTGCCAATAACAGTAACATGGACAATATGGACAGTTTTGATTATTTTTAATTATTCAGATAGATTATTCCAACATGATTGTTCGAGGGTCGAAAGACGGTTGCTTTGAAAGGATATTCATTATGTTCCTGAAAGTGCGGAGTCTTCGTAACAGCTTTTAAAAGGTGACAAAATCCCCTTAGAGCACGGTT…
>TCONS_00616343 database_lncRNA_id:"100577303" chrLG3 - 3019506-3021869_3021943-3022114_3022279-3022945_3023393-3024008_3024191-3024314_3024563-3024725_3025979-3026273	TCONS_00616343	XLOC_163006	database_lncRNA_id:"100577303"	chrLG3	- 3019506-3021869_3021943-3022114_3022279-3022945_3023393-3024008_3024191-3024314_3024563-3024725_3025979-3026273	CGCCGGTGTGCTCAGCGTCTTCGGTCATTGTAGTCTAGTGTTGGCACGATATAACGAGGGAATGGCGTGTCTTGCTTATAATTGAACCGAGCACCTACAATCCAATCGTTCTTAATCATTCGAATTCATCTCGCTTGCAAGTTCCATTCTCCTTTATTATTCGTTGTCTTACCAACCTGTGAAACTTATCCGAAATTCATATTCTTTTTTTGCCAATAACAGTAACATGGACAATATGGACAGTTTTGATTATTTTTAATTATTCAGATAGATTATTCCAACATGATTGTTCGAGGGTCGAAAGACGGTTGCTTTGAAAGGATATTCATTATGTTCCTGAAAGTGCGGAGTCTTCGTAACAGCTTTTAAAAGGTGACAAAATCCCCTTAGAGCACGGTT…
>TCONS_00900648 database_lncRNA_id:"100577306" chrLG8 - 8248135-8249428_8250027-8251096_8252588-8252670	TCONS_00900648	XLOC_242308	database_lncRNA_id:"100577306"	chrLG8	- 8248135-8249428_8250027-8251096_8252588-8252670	TGGCGTCAGTCTATTATTGAAAATCGTAACGAGTGGATGTACGTTGTTCGAAATATATAATTGAGAAAACTTTTATTAACAAGGAAATAATGATAAATTCGATAAATTTAAAAAAATTGGAATTCAACTGTTTTTTCCTATTCTTCTATATTTCAACGAAGAATATAAAATAAAGTTCCACCAAAATTCGTAACAAAGAAATCCTCGAAAAATTTTCCCGCAACCTTGTGTCAAATACCGAAAAACGGGTAAGTTTGAATCTACTTACAAATCACTTTTATACTCAATCATCGTACATCAAGAGTTAAAACCATGGAGTTAAAATCATCCAATTCGAAATAGATGGAAAAACCAACAACGGATACCACGAAGTATTTTCACGCTAGGCAAAGGTAACCA…
>TCONS_00872331 database_lncRNA_id:"100577307" chrLG7 - 9405888-9407752_9408462-9409011_9409132-9409453_9420275-9421642	TCONS_00872331	XLOC_229307	database_lncRNA_id:"100577307"	chrLG7	- 9405888-9407752_9408462-9409011_9409132-9409453_9420275-9421642	TATACGTTTAATTTAACAATGGATAAAATATTGAATTCTCGATTTCAATTATGACTTGATATAAGTGATATAATTGTAACCAATTTTAGATTAAATAACACAAAAAAATATATTTTGCAACAGAGAAAGAACAGAAAGATTAATGTAGAAAATTTTCTGGATAAATATTTTTTATTTGATTCAAATAATCACGCATGACGACATAAATTTAAAATAATATATATCCATCATGCGATAACATCATCGGTTTACAAATTTCTTATATCTATATCTGGTTCACAAATTCGGTGATTAATACTGGATTTGACTAGTTAACTTAACACTAACAGCCAACTGAAAAATGTATACATAACAAGAAAGAGAAATACAATTTTAACGTATTATTAATAAATTGATGCA…
>TCONS_00524142 database_lncRNA_id:"100577317" chrLG16 - 4819477-4819601_4819677-4819916	TCONS_00524142	XLOC_137854	database_lncRNA_id:"100577317"	chrLG16	- 4819477-4819601_4819677-4819916	AGCAGAACACGGAACGAATGGGAGTCGGTGGTGGTAACTCGACTAGGAAACTCGTGCATTTGATTCATTTGCATGCGTTCCACGTATACGACATACGATTAGATTTTCACTTGGAATTTAAGACTCGATTTACACAGACACCGATCATAATGTCGTTAAAACTTGGTCACATTATATTTTAAAGTGATAATCGATTCTTTTCAAAAATTCGAGGATTTGGAGATTTTTCTGGAGAACGTGATTAATTAATTCCAAAGTTCGCTTCAAGTTTGCGTATGTAAAATTTGCAATTTATTTCCGCACGATCCAATCGAGTATTCGAAATGTGTACACGGAAATGTGTGAATTACAACGTGAAAATCTCT
>TCONS_00185198 database_lncRNA_id:"100577336" chrLG1 - 12723939-12724268_12724379-12724717	TCONS_00185198	XLOC_043900	database_lncRNA_id:"100577336"	chrLG1	- 12723939-12724268_12724379-12724717	CGGAAAGAATGATTATTATTAGCAAGATTTCCTGGAAATCTCTACTCATCATTGAAATATTATGATAGGACGATAGAAGTCTCAAGAAAACTACCGATAAGTCACGTGATTAACTCGCAATTTGTTAATCAACAAATCAGTTCCTTTTTTAAATATCTATTCGATTATCAATAATAAAATCTCGAATAAATATCCTTTTTTTTATCGCTTCCAATTTTCGTATTCTTCATACGACAAACGTTACGAGACATGCGTGCGCATATTTATTCTGGCACACACGTGGCAACAGTGCTATACAGGAAGCACGCGCATTTCATCTCCGCAGCTGTTTTTACATCGGTGCACATATGTTTACGTTCCCGGCTAAGGACAAGTCGAGAATATGTTATGAAGCGTTAA…
>TCONS_00773615 database_lncRNA_id:"100577360" chrLG6 - 6875462-6876961_6877285-6877877	TCONS_00773615	XLOC_211793	database_lncRNA_id:"100577360"	chrLG6	- 6875462-6876961_6877285-6877877	GTTATATATGTGCATACATGTTTATATGTATTAGAGCATCATTTGCAACTGTTAGAATAAAAAAAAGAACGAGGAAAAAGTGAAATAGTAGAACTGAGGGAGTCATTAAGTCGGCACTTCACTCTCGATTTTAACGCCTCGAAGTGACGCACTCTTGCATCAAGTACGTTTTAGTTCGTCCTACATTTTCGCCAATATCAGAAGCATTACTTTATTCCAGTCTCAACACTTTCGACAGACTTACGTCAGTAGCCTTTGAACATATCTCAACTTTCTTACAAAAGAATTCTATTAACGAAACACTGATATTTATTCTTGCCAATTATCGATTAGTCCTAAAGATCGACTAACTCTGAAATTATCGATTCTGTCAAACATGTCGCACATATTAGTCGTATA…
>TCONS_00771126 database_lncRNA_id:"100577373" chrLG6 + 16833988-16834637_16836524-16836618_16836710-16837305	TCONS_00771126	XLOC_207906	database_lncRNA_id:"100577373"	chrLG6	+ 16833988-16834637_16836524-16836618_16836710-16837305	ATTTCTTAAAAGGTTAAAAGCAAATATATTATTGGTTCGAAAAAATTACGTTTGACCAATCATCGCATGAGCACGCACACATAAGAGGCGATTGTTTTCGTAAACTCGCTATTCGTCAATGCAACGTTTAAGCACAGAACGATTCGAACTTTCTCTTCGATCGAAGTCTTGAAACGGTTATCATCGAAATGGACAATAACGAAGGGAAAAGTCTGGGATACCGTTTATGCAGGACCCTTTCCAAGTCTTTTCTATTCTGTCTGCCATAAATACGGAAACACACGATTGTACTATCGGCGGGAACGATAAAAATAGACCTCCCGTATAGGTTAAGTTTGGCCCGCTTACTATCGGGCCGCAAGTTACGATTAAAAGAGCGCGGCGCAGATCCGCCCAGGC…
>TCONS_00546041 database_lncRNA_id:"100577383" chrLG2 + 7223871-7224690_7243203-7243746	TCONS_00546041	XLOC_142864	database_lncRNA_id:"100577383"	chrLG2	+ 7223871-7224690_7243203-7243746	CTCGTTTGTCTCTGCGTGTGACGATTAAATGCATTACAAGAGTCGATCCAGGCCTGAAACTTCGATAGTGGGTTGCGAGGCTGTAGGTAAGCTCTTCTGTAATGTTCTTATGCGATTACCAGACGTACCTGTCTCCCTGACAACGAGATAGAGGGCAGTGGTCATGGATATTTAATGGGCCTTTGCCTCGGATGCAGGATCATCGATCTGATATGACGACGATAATTAATACCGGAATTTCCTCGGTCAGTTTACTGACCCGTGTGAAAACGAGTATTAATTGTTGAAATGGACCGCGATGCTTCTCTCTCTCTCTCTCTTTCTCTTCTCGTTGTGAAAGCAAATAATCGGAATAAATTATATATATTTTAACATATCACAAATGAGCCAATCCCCTCC…
>TCONS_00107023 database_lncRNA_id:"100577384" chrLG1 - 7777630-7778330_7778436-7778791_7778866-7778997_7779111-7779228_7779317-7779442_7779560-7781467_7781558-7782515	TCONS_00107023	XLOC_041575	database_lncRNA_id:"100577384"	chrLG1	- 7777630-7778330_7778436-7778791_7778866-7778997_7779111-7779228_7779317-7779442_7779560-7781467_7781558-7782515	CTGTGTAATATTCGATGAATAAAGTAGTTTGAGTTTGAAAAAAGCACAAAAATAAATTAGAAAAAAGTAATAAAAATAGAAACTCAATCTTTATAAAAAAAAAAAGAAAAGATATACAATCTGTATATTCTCTTCCTGTACAAATTAATATTCGTATAAATATCAAAGTTCAAGAGGAACACTTTCTCCAAACATTTTTCCACCGAATCAAACGTTACGACTCTCTCAACTTTTCCACGTAGATTTTACGACGTATCCGAGCTTTATCCGTTGAAACGTATCTCTCAAACGATCATAGATCGTTTACCGTGTTTCCAATAACGTGGCTCGTGGATCGTCTGTAATTCCACCCACGTGCTGCGTCATGTCCTGCGGTCCATTCATCAAACAGCGCGAGTA…
>TCONS_00202187 database_lncRNA_id:"100577384" chrLG1 - 7777630-7778330_7778436-7778791_7778866-7778997_7779111-7779228_7779317-7781467_7781558-7782515	TCONS_00202187	XLOC_041575	database_lncRNA_id:"100577384"	chrLG1	- 7777630-7778330_7778436-7778791_7778866-7778997_7779111-7779228_7779317-7781467_7781558-7782515	CTGTGTAATATTCGATGAATAAAGTAGTTTGAGTTTGAAAAAAGCACAAAAATAAATTAGAAAAAAGTAATAAAAATAGAAACTCAATCTTTATAAAAAAAAAAAGAAAAGATATACAATCTGTATATTCTCTTCCTGTACAAATTAATATTCGTATAAATATCAAAGTTCAAGAGGAACACTTTCTCCAAACATTTTTCCACCGAATCAAACGTTACGACTCTCTCAACTTTTCCACGTAGATTTTACGACGTATCCGAGCTTTATCCGTTGAAACGTATCTCTCAAACGATCATAGATCGTTTACCGTGTTTCCAATAACGTGGCTCGTGGATCGTCTGTAATTCCACCCACGTGCTGCGTCATGTCCTGCGGTCCATTCATCAAACAGCGCGAGTA…
>TCONS_00776036 database_lncRNA_id:"100577398" chrLG6 - 16830969-16831420_16831613-16831773_16831856-16832219_16832431-16832780_16833077-16833731	TCONS_00776036	XLOC_216758	database_lncRNA_id:"100577398"	chrLG6	- 16830969-16831420_16831613-16831773_16831856-16832219_16832431-16832780_16833077-16833731	AAAAAGAGCTTCTCTCTCATATACGTATGATCTCGACAACCTTTTGAACATTAATCTCTTTACATCCCGATCTAAGTATGAAACAAGCAAATTGTATGCGCGAACCACGTCCTTTCGAATAAAAGCGACAAAAGGGTGTCGGCTAAGCGGTCAGCCTAGCTACACATACTGGTTAATGTGTAGACATTTGGTGTTCACGGCTGTATCAGAGCAAAGAATGAATATTCAACGGTAAACAGCGGGCAGCAGCGGTTTGCAAAGGGTTGTACGCGGAGATAGAGAAGGGATAGGAGGCAAGGTGGTTCCTGGTTTGGCCAGCAGGGGAGATCTGCCGTGACTTGTGCAGATATAAACGTGGCCACGGTTCAGAGGGGCGTTGTTTACGATATTACATCTGTA…
>TCONS_00301706 database_lncRNA_id:"100577406" chrLG11 + 604595-604740_608624-608934_609177-609263	TCONS_00301706	XLOC_070367	database_lncRNA_id:"100577406"	chrLG11	+ 604595-604740_608624-608934_609177-609263	GTTGGTCACTGCACTACCAGCATCGTGTATTGAAAGGAAAATAAAAAAAAAAAAATGGGAATGATTAGATGTGAATCCCCGCGAACGCATAAATATCTTTGGAAAAGTGAATAAAACGATTTGAATATTCTTACGAAATTTGTTTGGGATGGTTTACCAGAAATAAAGTTAATAAAATAGCCGTTTTCATCGGACGAGGTGGCCGAGTGGTTAAGGCGTTGGACTGCTAATCCAATGTGCTCTGCACGCGTGGGTTCGAATCCCATCCTCGTCGATTTCGCTTTTTGTTACTTTGCAAAAATTTCTAATTTATAAACTATGTGTTGGTAGAGAAAGTTGATAAAAAAATTGATGGCTCTTTAATATTGAAGACACCAAGAGTCATTGAACTTAAAAACA…
>TCONS_00254270 database_lncRNA_id:"100577407" chrLG10 + 4417047-4417248_4417998-4420456_4420564-4420758_4420997-4421023	TCONS_00254270	XLOC_059084	database_lncRNA_id:"100577407"	chrLG10	+ 4417047-4417248_4417998-4420456_4420564-4420758_4420997-4421023	CATAACCTCTAAACTAAACTAAAAACTATTCATCTGTGATTAAATTGTGTTAACTTTAAGTAAATAATTAAATAAAATAAAAAAATAAAGATAATATTCTTAATATATAATAAAAAAAAATGTAGTTTTAAATTATTCAATATATTTATTACGTAAATTATAATGTAATCATTTTTATCTGGCAATCATATTACGTGAATACATAATAGATAATCGTCTTTATACAAGCAATAACATTATACAAATATGATATCAATTCTATGAAAAAACAATGTTTTCCAGAGGAATTTCTGTGCTACTAATAATTTAGTTTTTTGCATAACAATTATATATTCAATAAATAAGATGAACATGTAGAATAATTTCTTTTTTTACCTTAAACATTGACTATCCTTTGTG…
>TCONS_00778108 database_lncRNA_id:"100577422" chrLG6 + 6765944-6767629_6767769-6769305	TCONS_00778108	XLOC_202814	database_lncRNA_id:"100577422"	chrLG6	+ 6765944-6767629_6767769-6769305	TTTATTATTCTGTCTTTCTTCCTCTATTGATTGTATATCCTCTATTTTACTTTCTTTTTCTTTCCCCCTCATTTTTCTTCCATTAATGATTATTACAATTATTATTATTATTATTATTATTATTATTATTATTATTATTATTATTATTATTATTATTATTATTGCTATTATGATAATTATTATTATTCTTTATTATTATTATTATTATTATTATTAATGTTAATGTTATTACATAAATATGTTAATCATTCGATTATGTTATCCTCGAGTGTTAGATTGGGACGTGCAATGTTGCGACGGTTCAAAATCAATATTTACTTCCAAATATAATTAAATTGTTAAAAAATTTAAAAAAAATCGTATCTTTTGTAAGCGGGGAACATTTTTCGTCTAAATGTT…
>TCONS_00390664 database_lncRNA_id:"100577428" chrLG13 + 1679375-1680118_1680184-1680667_1681414-1684740	TCONS_00390664	XLOC_100569	database_lncRNA_id:"100577428"	chrLG13	+ 1679375-1680118_1680184-1680667_1681414-1684740	GTTTTTCTCGTGCGTTTACAGATCTAGAAAACAGCTGGCACGAGCGAAGGTCACCGGCCATGGAATATAATTAGTCCGACACTTATGGAACGTCAGGCCAGCTATGGTTCGCAGTGGCCGCAACGAGGTAGACGAGGTAGTGGTCTAGGCACTTGGAGATCGGCCTTTGCTCGACACGTGTGCCCATGGACAACGTTATTTCCTTCTCGAATACTGGGTCCTTGGTCCGAATCGTATGCCACTCGCACCGCCATAAAAGGAACGATCGGGAAATGGGCAGCTGATGATCAATATGATCGGGGGGGGAAGGGAAAAAAATATTTCAAGAGTAATCGGCTATTTTTCAGAAGAAGCAGAAACTTCCTAGCGAACCTCCTCCTTCCCCTCATTATGGTATTA…
>TCONS_00705775 database_lncRNA_id:"100577468" chrLG5 + 7119197-7119848_7120186-7120376_7120783-7121070_7121289-7121685_7122222-7125516	TCONS_00705775	XLOC_187744	database_lncRNA_id:"100577468"	chrLG5	+ 7119197-7119848_7120186-7120376_7120783-7121070_7121289-7121685_7122222-7125516	GCCAAACATAGATCGGTCCCATGGGCGTTTGATGGGGCCACATTACCTATGTCACGTGTCGATCCATGGAGAAATTCGATTCATAAACGTCAAACACATGCTATAGATTTCACTAGACGGCCATTGTATCGGTCTCTCTGTGGTGTCGGTGACAATTTCTGACTACGTCGATAATAGCGAGCCGAATGATAGAATAGATATTTCTATGACTATGAAAGATGGCGCACAACAGCAGACGTGCACTATATAATAGTTCGAAAACGCTTCCAGCTTAACGTTCTATCTTCGATACGATCGGTAGTTACTTAGCACTTCTCTGACGCTCGTTCGATCGTTATCGTCGCTTGCGAACCGGCCCTGCCCCCCTCGTTGGCCCGTTAAATTTATTACGGGCCCCTG…
>TCONS_00757945 database_lncRNA_id:"100577468" chrLG5 + 7119304-7119848_7120186-7120376_7120783-7125521	TCONS_00757945	XLOC_187744	database_lncRNA_id:"100577468"	chrLG5	+ 7119304-7119848_7120186-7120376_7120783-7125521	TTTCACTAGACGGCCATTGTATCGGTCTCTCTGTGGTGTCGGTGACAATTTCTGACTACGTCGATAATAGCGAGCCGAATGATAGAATAGATATTTCTATGACTATGAAAGATGGCGCACAACAGCAGACGTGCACTATATAATAGTTCGAAAACGCTTCCAGCTTAACGTTCTATCTTCGATACGATCGGTAGTTACTTAGCACTTCTCTGACGCTCGTTCGATCGTTATCGTCGCTTGCGAACCGGCCCTGCCCCCCTCGTTGGCCCGTTAAATTTATTACGGGCCCCTGCGGAAAAGAGGCTGACGGCCCATCTGCATTCCCCTTTCTTTCTCTTTCCCCCCTATCCTCCTGCATTTCTTTTCTTTCATCTCTAGTTGAAATGTGTTATACGTATA…
>TCONS_00044858 database_lncRNA_id:"100577473" GL630619.1 + 2451-2574_2664-3268	TCONS_00044858	XLOC_014763	database_lncRNA_id:"100577473"	GL630619.1	+ 2451-2574_2664-3268	ACAAATTTAAATTTGTGAATATTAATTTAGATGAAAATGATTTAAGCGTATCAAAAGAACATTAACATTAACATATCACATATCACAAGATGATAATATAAGAAGATAAAATGGTAAAGCATTGATACAGATGTTTCGAGATGATACTTTAACACTTGAAAATTTAGATGGAAATAGATTTGGATTCAAGGACTCAATATAGAATCTACAATTTTACCATACAGTATCATTGAAAATTTTGAAGTTGGATGTGATCGTTCCGTAGAGAATAATATGATATCTATTTATATTTTTATATTTAACATTAATATTCAATGATAGGCAATGATAGAGATTGGCATGGTGAAATTAAATAGAAGTTTGAAAATGATATGGTAAGCGATAATTGAAGAAATGAGT…
>TCONS_00578638 database_lncRNA_id:"100577474" chrLG2 - 69249-69387_69943-70098_70188-70339_70484-70790	TCONS_00578638	XLOC_146814	database_lncRNA_id:"100577474"	chrLG2	- 69249-69387_69943-70098_70188-70339_70484-70790	TTTTCGTGCTCGCTGCGAGTGTCGTGTCTCGTTGTTATCTTAACGGCTGCCACGGCTGCTAACGAGAATACAGACTGTTCGTTATCTCGGCGGTGAGAGCACGCGCAAGCACGACACTTGTGTTTTATACGACCGAGCCAGAGACAGTGCGAATCGAACGCAGGGAGGCATCTGAAACGAGCGAATTGTGAGGTTAGAAAATTGGTAATTATTCGACTCGTGGAACGAAATGAAGTTCGATCGAGGGGAGAAGAGCCTTCTTGCTTAGTGTGCTTCTTTCTTAAAGAAAAAAAGAATGTCCAATATGTTTTCGAAAAGATATTTAAAATAAAAATAAAACGTTGCTACGTAGAATTTCTGTTATATATCCGCGGTTGCATGCGTACAAGTATGCGACCG…
>TCONS_00849970 database_lncRNA_id:"100577476" chrLG7 - 3965640-3965997_3966077-3966126_3966222-3966906_3967311-3967502_3967596-3968513	TCONS_00849970	XLOC_227124	database_lncRNA_id:"100577476"	chrLG7	- 3965640-3965997_3966077-3966126_3966222-3966906_3967311-3967502_3967596-3968513	TGAACGTATAAAATATTGAAAAGTTCGCAGAGAACAAGTGGTCTTGATATTTTTAAGCGGCTTCATACGTACCCTCTTTGCCTTTAAATAGTCGATTAAAATGATGTGCTTCCTCGAAACGAATATGGCTTGCAAAAAAAAGGGCAACGAGAGAAGAAGGATAACACATGCGAGGTAAATGCTTAGGGGATACGCGGGACGTAATCGATACGCAATTACATTATCGTGTAAGCGGCATGAAGCGGTTGCTCTCAAGATATAAGGCGATTAAACTCTGAATTAATGGAGGACACGCGTAACGAAGCTTCGCCTTGAAATTAGATCGTTCGAAGAAGCACGAAATCCGCTCAGAGCACCAGGCATCAAGAAGGACGACACGCTAGTAAAGGATGAACACGA…
>TCONS_00868328 database_lncRNA_id:"100577476" chrLG7 - 3965647-3966126_3966222-3966906_3967311-3968103	TCONS_00868328	XLOC_227124	database_lncRNA_id:"100577476"	chrLG7	- 3965647-3966126_3966222-3966906_3967311-3968103	GGAGGATCGTCGAATGGGAGTCTGGCCACGAATTGCTCGGCCAAGAATTCGCGAAACATTTTTGGAACATCATTTTGTATCCGATTATGGAACGACGACAGAACGAGAACGGTCGAGACTGGCCGACCAACTAGCTGGCAGCTGGCAGGACCTCTATAGAAAAGCAATAACTCGTGCCCGTAGGAAATGAACGATAGGCAATCGACTATTGGATATCGAACCGAGAATTCGATACGTAACTACGCTGCTTGTCTCCTAGTAGGTCGCTAGCTATGGGTCGGCCACTTGTCCGCTTCTGCTCCTGCCTCTGCCGGTAGTAACTTGCTAGATGTAGGTTGATTGCCTGCCCGATAGGGGCGCACTCTTCTTTTTTTCTTCTTTTCCATGTTTCATGGCCGA…
>TCONS_00607608 database_lncRNA_id:"100577484" chrLG3 - 11687324-11689771_11690003-11690318_11691724-11691953	TCONS_00607608	XLOC_166468	database_lncRNA_id:"100577484"	chrLG3	- 11687324-11689771_11690003-11690318_11691724-11691953	CACAATTGTTATGCAGCTCGAGAATAATTTACTCGTAGAGGTCAACGAACATCCAAATTTATATTCTATGCCTACTGTTCCTACTGCGATTCTCTGTTGCGCATACGATGCCGAGAACACGTATTGTAACAAGAAAACCGTTAGATCTTCGACTGTGGCCGACCAGCCGAATGGAAAGAGGGAATCTTTGCAACCGGTGGTTGCACTCCGCTGCCAGCTATCATTTTATGTAATGTTTCAGGTAGAAAAGTATCTACATAAGATTTATGCCAAATGCATAAATTAGAAATTTTTCTGGATGAGTAGTCACGTCAATGAAACTTCTAACATGATCTCGAGAGGCTGCAATCGGCATTAAAAACTATCTGGCATAATGGCGCGAGTTGCGACACTACACGT…
>TCONS_00326196 database_lncRNA_id:"100577487" chrLG12 + 1315665-1316110_1316813-1318519	TCONS_00326196	XLOC_085985	database_lncRNA_id:"100577487"	chrLG12	+ 1315665-1316110_1316813-1318519	TGCATACACATGGGAGGAGGAGCGTGGCATTAACCGCGGACGCGGCCTAGAATGCGTTACAAAGCGTTCGATCGGATTAAGCGGCTAATAGCCAGTCTATAATAATAATCCCGACATAATAACGTGGTATTACGCGAAGGATCGGGCTACACCGTATAATTTCGTCGCGGCGTGGTCGTAGCCCAACCGCCAAAAGGGCTAACCTAAATCTCGGTTTCGTACCTCTTGCTCGAGAAAGAAGATGATGATCGGCTATCGCTGCCAAAACCGATTAGCCAGATCGATCACACACAGCCTCTCGATTATTTTCTTTAATATCTCGCTCGTTGAAATAAGTTATCGCGTCGCTTCTTGTTGTCCTTTAGACCTTTCTTGGTTGGGGAATAAATCGATGCGTGG…
>TCONS_00299027 database_lncRNA_id:"100577494" chrLG11 + 11196100-11196158_11199439-11200130	TCONS_00299027	XLOC_074967	database_lncRNA_id:"100577494"	chrLG11	+ 11196100-11196158_11199439-11200130	CGCGGTAGCGCACGGATCACCTCGCGCGTCCTTCACGGCTCCCCAAGTCGAGCATAGGTAATTAGGAAGGAAGAAAGGAAAGGACGAGAGAGAATGGCGCGATTGTTGCCTCTGTCGCGAAGATTTTCAAAGGACGCGAGGTAAGAGGGAAACGGCGGTTGCGTTTTGAGTCGGTGCAACAAGGCCGAACCCGTAGTCGCCGCCGGTTTGCATCACCGATCGACATCGCTCGCTCCGCTCCGCCATTTTCTTCTCTCTCGAGAAAATTTCTTTCCTCCAACATTTTCCAACATTAACGAAGAAGCATATTGTGAAAATAACAGTGTTCGAGAAATCTTCGAATCTGAAACTCGCGTAGATAAAAAAAGAAAGAAGAAATTGTCGATCGGCCAATAACTT…
>TCONS_00829559 database_lncRNA_id:"100577532" chrLG6 + 16120109-16120406_16120471-16120930	TCONS_00829559	XLOC_207651	database_lncRNA_id:"100577532"	chrLG6	+ 16120109-16120406_16120471-16120930	GAAATTTCAATTTTAAAATAATCAGTATCATTTATACTAATCACTATCTTTCAAAATTTTAAATATTTATAACAAATGAGTCACGCAAATGAACTAATTACTATTTTTTAAAATTTCAGATAATATGTATTACAATTCTATTACAAAAATTGCATTTTGGTCATCGTTTTAAGAAAACTCACTATTGGAATGATCTCCAAATTTGATCATAATTTAAAGAATTTAAATTATTATTGAAGATCGAATTAAGGTTAATTTTTTGATAAAAAATCGTATATCTGACCAAAGAAGGAGAAAGAGACATCGGAAGATGTGGATGGAGAGACATGGAGGAGTAGTCGAAAGAGAGGCAGCTCGGTTCAATTTGACGAGGTGTAGGTAAACAGGGGAGATCCGGCA…
>TCONS_00640133 database_lncRNA_id:"100577538" chrLG3 + 1012277-1013425_1013513-1013878_1014045-1014095_1014172-1015641	TCONS_00640133	XLOC_156733	database_lncRNA_id:"100577538"	chrLG3	+ 1012277-1013425_1013513-1013878_1014045-1014095_1014172-1015641	GATTGCTGACACAAAGATGGCTGATTGGCTCGTTTATGTTACGGTAATGCTCGAAGCTTGGTGGAACGTCTCTCGATATCGAGCTCGTTTCTCGTGCTAACGAGATTTCATCCATGTTCTCATTAAAGAATTAAATGAGAATGTTCTCGTGAGACAGTAGTGAATGTGAATAATAATTCATCATTAAGGAAACCATCGTATCAAGAGAAGAAAAATCTCCTCTTTAAATTAATAATCCGTGAATTCTCGTAAAGGTCCTCAAATCTTTCGTTAATTTCGCGTATCAAAAGATAGAGAAATAGCTTGAATCGTCTAATAATCGTTCTTTCTCCGTGCTCGAATTATATTCAAACGTATTAAGGTAAATCCTTTTCATTCGATATTTTTCATTATTCGTTC…
>TCONS_00425742 database_lncRNA_id:"100577542" chrLG14 + 3306593-3307016_3308071-3308237_3364800-3365941	TCONS_00425742	XLOC_113869	database_lncRNA_id:"100577542"	chrLG14	+ 3306593-3307016_3308071-3308237_3364800-3365941	GTAATATTGTATTAATTCGTTATTATAAAATACATCACGTGAATTCATTTGTTTTAAATTTGTACATTTACATTCATGCAAATGTAATTGTTTAAAATTCGAATAATAGCAAGCTCTAATCCACGCCATGACACTTGATGCCTAATTGGATGAAATATTGCGCAGTAAAGACGCCATGACACCTGTTTGTTGAACATATACATTAGAGGGCAGCAGGACTATGTATGTTGCAATGACGCAGTAAGAAAATTCAGTTTAAAAAGTTTCGTAGGAAATCAGTAAGATATTTTTTTCGTATTCACGTAGAATTATCATTTAGTGCAAATATAGTGCAGTGAATGTGTTCAATATTTTTTTCGTTGTAGTGAATAACGTTTGAGAAAACTTTGGTGATTCGAA…
>TCONS_00433554 database_lncRNA_id:"100577542" chrLG14 + 3306362-3306395_3306702-3306870_3306958-3307016_3308071-3308237_3364800-3366144	TCONS_00433554	XLOC_113869	database_lncRNA_id:"100577542"	chrLG14	+ 3306362-3306395_3306702-3306870_3306958-3307016_3308071-3308237_3364800-3366144	GGTAGGACGTATATTTAGCTGCTTAGAAATCGAGCAAGCTCTAATCCACGCCATGACACTTGATGCCTAATTGGATGAAATATTGCGCAGTAAAGACGCCATGACACCTGTTTGTTGAACATATACATTAGAGGGCAGCAGGACTATGTATGTTGCAATGACGCAGTAAGAAAATTCAGTTTAAAAAGTTTCGTAGGAAATCATGAATAACGTTTGAGAAAACTTTGGTGATTCGAAAACGAAGAAACATTAATTATTTCTTATTCTTTGCAACTTTTCATCTTTATTCATCGACATAGAAGATCTACCTTAATGATGTCCCTGATGAATTTTTCTGAGAGCTCATCCGATGACTGTCTCAGAGTAACAGTATCATCAACCTAGTATTTGAGGTTTTTC…
>TCONS_00323517 database_lncRNA_id:"100577559" chrLG12 - 1884010-1884156_1889050-1889174	TCONS_00323517	XLOC_091394	database_lncRNA_id:"100577559"	chrLG12	- 1884010-1884156_1889050-1889174	ATTAGCCTGACGGTGTTAAAATTTGATTGACCGGATTAATTATCTTCCTGAATCGGACGGTCAATCTCTCAAATACAACTCGGTATTTACGTATTTGAGTTGTCCAAAGAAGTTGCAATATGCCGAAAATCGAAGGTTTCCAATGCCAGAGATCAGCGTTGACGAAATTCCAAACAGTTCTCGGAGGTTCTGTATCATCGATCCATTGCGTTCTGGGAAGGCAGTCTGGGAATTCTGGGATGAGGTTTGAAGATCGAAACAAGGATTCAGGG
>TCONS_00770588 database_lncRNA_id:"100577565" chrLG6 + 14927644-14927994_14928224-14928299_14928504-14928800_14929062-14929071_14929193-14929848	TCONS_00770588	XLOC_207116	database_lncRNA_id:"100577565"	chrLG6	+ 14927644-14927994_14928224-14928299_14928504-14928800_14929062-14929071_14929193-14929848	CCCCTTCGTCTTCCATTCCTAGGATCCGATTAATTCCTACCATCGGTCGATAATTTATGGCTGGCCATGCGTTACGCTCTCCACCTTCCTCCCTGCTCGTTTCACGGCAAAACCTCTTCGTATCTGTCACACCTTCCTCTAATTGCCGTGAACACGCGAGAATCTAAGGCAGCGAGCGGCGGCTTCTCTACCTTCTCTTCACTCCATGGCTCCCCCTTTCGAGGAATCAGATTCTCGAGGAAAACTGGCTCGTCGACTTCTCCGTAAATGATCGGAATTCACGCCGGAAAAATATTTTTTGTCGGATAAGAAAAACGACGACTGGCTCGGATGACAAAGTGATCGATCGAAGAATACCTGTTGTGCAGGAATCTCTTGCATTTTTCTAGGATTGTTGAT…
>TCONS_00780571 database_lncRNA_id:"100577592" chrLG6 + 16127280-16127303_16127440-16127692_16128167-16128449_16128613-16129011_16129242-16129434_16129804-16130030_16130116-16130285_16130387-16131315_16131435-16132484	TCONS_00780571	XLOC_207653	database_lncRNA_id:"100577592"	chrLG6	+ 16127280-16127303_16127440-16127692_16128167-16128449_16128613-16129011_16129242-16129434_16129804-16130030_16130116-16130285_16130387-16131315_16131435-16132484	GGAAAAAGACACAAAGTGTTAAAAAGAATACGATTTCATGAAAGAATGTAATGCGGTAATCTGATTCGCAATCGAAAAAGAAAGAAAGAGGCGGAAAGCGGATGACTTTGTCGCAGCGACGAAATCGAGTCTGTGGTAGAAGGGTTGGCATTAACGAGACCGGCACGCATTAGCTTTGCCCTGCAATATTAAACAGAGCACGAGTGTTTTCCACCAAACTTGGCCAGGACCGTACCAGCTATCGATTTTAACCCGTAGAATGGACGAGGTCATCTCTCCGCTTATGAAGCTTTAACGGATTGCGCGGTCTGCACACCGGCTCGGGTCACGACGGGAGTAGAAGATGAAATATTCAAGTGCTTTCCATTAACGGGACCGGTTTATACTTATCAAGGCTAA…
>TCONS_00208246 database_lncRNA_id:"100577603" chrLG10 + 10158283-10158770_10177580-10177808	TCONS_00208246	XLOC_061328	database_lncRNA_id:"100577603"	chrLG10	+ 10158283-10158770_10177580-10177808	CACGTCGTCGTCCACGTCGTCGCCGTCGCCGTCGTCTTCGCGATGGTGGTGATGATCATCGTCGTCGTCGTCATCATCGTCATCATCGTCGTCATCATCGTTCTCCTCGTCGTCGTCGTCGCCGTCGCCGTCGCCGATCTCGAACGAGTCGGATCGAGTTTTCGACTCGATCGGAGACGAAGACAGAGAGGAAAAGAAAAGAAAAGAAAAGAAAAGGAGGAGGAGGTGTGTGGAGGAGCGAGGGAATAAATGATGCGGCGCGACCAAGTGCGTGAGAGGAGAAAAAGAAAAAAAAAAAAAGGAGAAAAGAAAAAAAAAAGTAAAGACAAAACCGATTGATCGCAATCCTGAGAGGGACAGGACACGCGTGAGAAACGGGGGAAAAAGAGGCACGCGTGT…
>TCONS_00754338 database_lncRNA_id:"100577646" chrLG5 + 13550548-13552511_13552582-13553417_13553785-13554084_13554404-13554447	TCONS_00754338	XLOC_190476	database_lncRNA_id:"100577646"	chrLG5	+ 13550548-13552511_13552582-13553417_13553785-13554084_13554404-13554447	TCTAACAGACGTATATATAATCTCTATTTAAAAGTTGAAGGATTAAATAAAATGGATTATTTTGGAAGAGAAAGAGGGAAGAAATTTATGCGTATTATATTTATTTTCGTTGGAAGAAAGCGATGGCACTTTCAGATTTTTATCAGTATCAATTTACAAGCAATACAAATGAGATGCGCGGCATCTCGATCATACCGTAAGATGGGGGTGAAGTCTATGCGAAATCCGACAATTACTAATTTGCCGATGCTAGTATAAGATATCCCGATAAATCTCGCATTATCCTTCGCCCATTGCTTCGTGTGAGTGCCGTTTAATGGAGAGAACGTTTACTTATATCCGTCTAAGTATACACATGGTGTCCTCCAGAAATCCATCATAATCGTTACCGACTGACGA…
>TCONS_00895197 database_lncRNA_id:"100577652" chrLG8 + 1591040-1591485_1591592-1592153	TCONS_00895197	XLOC_233860	database_lncRNA_id:"100577652"	chrLG8	+ 1591040-1591485_1591592-1592153	AAAAAAACCAATAAAATCTACAATTATAGGTAAAATAATGATGGTATATATTACAGATCTCTATAACTTTGAGTAATTAGTTAATTGTATGAATTATAACACTATATGTTTGATACTATTTAGCGTTAATTAACGCTGTAATTGAAAGATAGCCGAGAATCGATATTTCCAAGCAGTGCATTCGATAATGTAAAACGATGTTATCTGGATCTCTTTCCAATGCATTCTTGGCAGTTCGTTAACAAGACTATGACTGTGAGTTGTATATCAGGAACGGAAAAAGGAAGGCGAAAGTATTCTATATATGATGGATTTCTTCTTCCTTAAGTATAAGAACGAACATCCTGCCCGCAGGGTTTCTAATAGCCAGTCTAGACGGCATCTGATTATTACATATTA…
>TCONS_00477668 database_lncRNA_id:"100577654" chrLG15 + 4631516-4631954_4632038-4632360_4632452-4632483_4632547-4632676_4633104-4633127	TCONS_00477668	XLOC_124050	database_lncRNA_id:"100577654"	chrLG15	+ 4631516-4631954_4632038-4632360_4632452-4632483_4632547-4632676_4633104-4633127	GCCAAAACGAGTATATTCAATATATATATATATATGTTTTAAATATTTAATCGAAAGGATTTCGAAGTGTGTTACTATTATGGAAATTCTTCTAGGTCGACGAGTGGAATCGTGTGTACGTAGTGTTGGGGAATTCTACGTACTGGTACTAATATCTAGGCTGTCTGGAGCGTGGCCGTTCTTCCTCCATGGGTATCGAGGGCCACGACGAAAAAGAAGGAGGAAAAAGACGAGGCCGTTTCTATGAACGAGCACGATCGTTTTCGGTGGTCGTCGAGCGACTAAGCCGGTCGTCGCTCTACCTGCCCAGTGGCCAGATCGATAGTAGGTCAATGGAATTCATCCGACCACGTTCGCCATCGTGTCTCCATTGACCCATCCGATTCTTCCTCATGATCA…
>TCONS_00615296 database_lncRNA_id:"100577658" chrLG3 + 9279847-9279935_9294721-9295383_9296089-9296650	TCONS_00615296	XLOC_160224	database_lncRNA_id:"100577658"	chrLG3	+ 9279847-9279935_9294721-9295383_9296089-9296650	CTTTCGAAGAATACTGTCGAGAAAGAATCGTCGAAATTTGCTTCCAGAAAAGAATCAACAAGTTCTACGTATACTTCTACGTTTCGAAGATATTAAAGAAATCGAGGTGAACAATCAACTCGTGGAAAAAGAAAAAAAGAAAGAAAGAAAAGAAAAGAAAACGTGAGTGTGCGAAGAAGAAACGATCTTTGATGAAAAGAATAATAATCTTTAATTGCCCGGAGTCTTTAAGTAAGTCTTTGAACATTTTAATTGAAATAGAACAATTTCAACAATTTCAATATTCATTTATCAATATTCAATATTCTTGATCCCTCGATGAGTTAAATCCGATTTAATTAATAATTAAAGATAAGGATTAACGTTGATACAACAGGATAATGGTTAATTATTCGCGTA…
>TCONS_00557317 database_lncRNA_id:"100577688" chrLG2 - 12277173-12277463_12278998-12279176	TCONS_00557317	XLOC_152291	database_lncRNA_id:"100577688"	chrLG2	- 12277173-12277463_12278998-12279176	GGGAACTATTCCTTTCGTCTTCCTCTCGGAATCGAACTAAATAGAAGAGCGTCATCTCGCTAGGATTTCTCGACCGCCCTGTTATTCGAGTACAAACGCATCGTACGTGATGAATAAACGCAGCCTTCTTTCGGGAAATATATCTCAACTTACAAAGATGATCACTTTTCGGAGCGAAGGGAAAAGGCCGAGTTGAGCCGAATTGAACGTCGAGGGCGGAACGCTCGAGCTCCCTCGTCGAAAATATTTCTCGGCTCAAGGTGGAAAAAGGCCGTTTAGAGAGGAAGCCGCTGCGAAGAGATGAAGACGAGGGAGATGGAGCCCGAGCCGATGCATCGCCCTGTTAAAACTCTTTCTCCACCCAGTGGGATCTATTCTACACGATGTCTAGCTCGAACC…
>TCONS_00569633 database_lncRNA_id:"100577688" chrLG2 - 12277128-12277463_12297056-12297265_12486362-12486432_12487149-12487229_12488006-12488074	TCONS_00569633	XLOC_152291	database_lncRNA_id:"100577688"	chrLG2	- 12277128-12277463_12297056-12297265_12486362-12486432_12487149-12487229_12488006-12488074	AGATAATGTCGAAGAAATTGTCGAATGATTTATGCCATGTCACGGTACGATAAATTTTCTATATATCAGGTTATTAATCGATTACTGATATAAGTTAATTTCGAAGAAAAAAATGCAATATGGATGCCAATGTCTTTTTGTGGAAACGCGATATTTTTCAGTTTTTATGATGATTTTTCATAATCGATATTGATGCCAATGTAGATTCTTCGCATCTATTGAAAATATATTTCCAATACAATCCTGGAAGAAGATGAGTAAAAATCATCATCACGAACGAGTCGAGAGATCGGATGGCACGTGACAGACGTCAGTTCGCTTTGCCCGGACAAAGACAAACCCTTCGTCGACTCAAGGTTGGCCCGAGAACGTGGCCGGAAACCGCAAGGTGTGCCGCGG…
>TCONS_00641753 database_lncRNA_id:"100577718" chrLG3 + 11169029-11169874_11170090-11170438	TCONS_00641753	XLOC_160994	database_lncRNA_id:"100577718"	chrLG3	+ 11169029-11169874_11170090-11170438	TTTATATAAATAATTATATAAAAATAAAAATAATTGTGACCATTCTTTGATATTACTACACTCTTGAAAAATTATTTTCAGATATTTGTTTTCAGACACTGTAATTCGGATATTAAACTTTGTGTGTCGTTCGATCTCGGCCAATTCGACGAGCTAACCTAACCAAGTCCAGTCTCTCTGTAAAACTTTGAAGAAAACAGAAGGAAGTTGGAATGTTTCATTTTGCATTTGCGGTTTACCGCAATAATAGAAATTTATGCACCTGAGGGCCATTAATTTTTTTCATTCTTCCTCGAATGACTGACTTTCCTCGATAAAAAACGCATTGCAGAATCGTTGCCAAGAGAATCGATGATTTGCGCGCGCCACTTCTTTCCCTCTCTCTCTTTCCCTCTCTCT…
>TCONS_00611119 database_lncRNA_id:"100577721" chrLG3 - 966788-966976_967047-967307_968353-968627	TCONS_00611119	XLOC_162311	database_lncRNA_id:"100577721"	chrLG3	- 966788-966976_967047-967307_968353-968627	GAAACTTAAAGCATCGTTCTTAATTATTATTCCTTATTTTTCGCGCAATTTTCTAAGAAAAAAATTGTTATTTTATAAAATCGGTCACGATTACAAATTCGGTAAAGAAAGTTAGAATAATTTAGAATGAAAATTTATGTATTAGATTCTAGTATTTATTTATATCAAAAAAGTGATACATAAAAAAGTGATACGTTCTAAAAATCATATAAATTTTATTACGACAAATTTTTGATGAAAAAATTTTATTCACATTTTTATTCCTATATATCTTGCTAACTCATGAGATAATGCGATTGGAGAAATAAGCAGACACGTTACAATATGTGTGAAAGCTTCATCAGCCGATGGAGAAAATCTGATTAATGGATTTCGTATTCTCACGCCATTAGCAACATT…
>TCONS_00891267 database_lncRNA_id:"100577723" chrLG7 + 3620119-3620791_3650112-3651811	TCONS_00891267	XLOC_221328	database_lncRNA_id:"100577723"	chrLG7	+ 3620119-3620791_3650112-3651811	CTGGAGAGACGCGCAGCGACGCCGTTATCGTCTGGCCGGTCGTTTGGACTAACCTACAAAACTGTCGAGGAAAGAAGAAAGGGGGAGAGACAGTGAGAGAGAAAGAAGGAGAGAGTGCATGAGAGAGGGAGACAGAGTAGCCGGCGTGCGTTTCTCGTGTTTTCCGGTCTCGCGGTGACTCGCGTCCTATCAATCGTGGGTGCTGTTACCGCGTCAAAGCCGGTCTTGACTGGCAACTCGTCGTTGCTGTCATCACGGCGTTCCTTTCTTTCGTCCCTCCGTTCGCGGAGGCAACGCTAGTCGAATACCGGCATAACAGTCCCTTTGTCTCGAACGCTCGGCAGTTGGCTGGCTGGTGTGCGGTTTCGCGAAGATTAGCCGGTCGTGGTTGTTTTGGCG…
>TCONS_00775655 database_lncRNA_id:"100577731" chrLG6 - 15119973-15120214_15120295-15123481	TCONS_00775655	XLOC_216152	database_lncRNA_id:"100577731"	chrLG6	- 15119973-15120214_15120295-15123481	TTTGAATTTAACTTTGAAGTGATATCTCATTTATCATTTAAATTTATCTCCCTCTGGCTATAAAAATTCATTCTTCTCACAAAAGCGATCCGCGTACGATTTCCTCCTTTTAATTAGGTTGTCTGTTGTTTAATTAATCAAAACGGGAGCACTTAGAAATTCCGGTTCGTGTTAAGAGGGGGGGGAAAAAAAAAAAGGGAGAGGGAACAATTCATCAATTCACCTTTTGATCATTCTTAATATTAATGGAATGGATCTTGATCGAGTTGTAAATCTCTGCAATTTTTAACGCGACTTTTGTAAGATTAAATAAATTATAAATACAAATGGAGTGATTTTTTTTAATAAAAAAAGAGAGAAAGAGAGAGAAAGGTGAAATCAATCGTGGCAATTTAGTAA…
>TCONS_00320345 database_lncRNA_id:"100577737" chrLG12 + 1547475-1548231_1548320-1548472_1548573-1548787_1549762-1550069_1550234-1550506	TCONS_00320345	XLOC_086058	database_lncRNA_id:"100577737"	chrLG12	+ 1547475-1548231_1548320-1548472_1548573-1548787_1549762-1550069_1550234-1550506	GCTCGCTATTACGGATCAATGTAACGTAATTTGGTCGGTTGCAATATAATATTTTAATATATCCGGTCGATTAATAAATTTGCATCCCCGTCTGATCTTCGTGAAATCAAATTTATTGTTACATTTATTTGTTTCTTGCAACTTCTTCTTCTTGTCGTTTATCTATATAAATTAATCGAGTATAGGTTAAGTATAAGTTTTATTTTGTTTTATCGACAATTGTTTTATAAGTGTAATGTGAATAAGCAAAGGATGTTCGAGTGCGGGTCTCATATTTTTTTTAACTACAAATGTTGTGAAATTTCTTTCTAAAAATATATATATATAATAATGATACGATACTTAATAATAGCTATACATAATCGATGATTGTCGGTAAATTACGGAACATCAAAGAGA…
>TCONS_00343899 database_lncRNA_id:"100577737" chrLG12 + 1547352-1547659_1547827-1548155_1548320-1548487_1548573-1548787_1549762-1550069_1550234-1551214	TCONS_00343899	XLOC_086058	database_lncRNA_id:"100577737"	chrLG12	+ 1547352-1547659_1547827-1548155_1548320-1548487_1548573-1548787_1549762-1550069_1550234-1551214	GTGAAATATATGCGTGAATAACGAGGGAGGACAGGCATGGGACGGGGTCCGAATTAAAACATCCTTGTCGCCTCGCAAACTAGCGACTAGATGGCGCTAATGCCTATTAGTTAGAAACGTGATGCTCGCTATTACGGATCAATGTAACGTAATTTGGTCGGTTGCAATATAATATTTTAATATATCCGGTCGATTAATAAATTTGCATCCCCGTCTGATCTTCGTGAAATCAAATTTATTGTTACATTTATTTGTTTCTTGCAACTTCTTCTTCTTGTCGTTTATCTATATAAATTAATCGAGTATAGCTATACATAATCGATGATTGTCGGTAAATTACGGAACATCAAAGAGAAGGAAGCTAAAAAAAAAAGAAAAAAAGAAAAAAGAAAAAATGAA…
>TCONS_00811971 database_lncRNA_id:"100577740" chrLG6 + 9117392-9117930_9118045-9118054	TCONS_00811971	XLOC_203812	database_lncRNA_id:"100577740"	chrLG6	+ 9117392-9117930_9118045-9118054	CGTCAATTTTCAGTTCGAATAATCTAGGCGTGTGCTTTCGAGGACTTTTCCAAAAATGAAGTGTTCATCGATACTCTTCTCTTGACAAATGTGTGCATTGTCGATGAATAGCGTGCTTCCAGCTTTACAATTACACCGTTGGCCGTTCAATATAGGATGAGAGAAACCGGGACACTTTTCATCCATGGGTGCCGGTCGTTTTGAAAAAATGGATTGTTGAATGCCCATAGATCCTTTTTACGCTCACGGTTCCTCCCTAGAGGATTGCTGGTTTCCTATGATTCGTCACTGGCGAAAACTTTTCTCAATGACTACACGAGGAACCTGGCTGAATATATGTAAGTATTCTGAACAACGTATCCATGAACGGGTACACCTGTAGCTACTACTACTATTCTC…
>TCONS_00814845 database_lncRNA_id:"100577761" chrLG6 - 9112802-9112967_9114325-9114682_9115244-9116121	TCONS_00814845	XLOC_212796	database_lncRNA_id:"100577761"	chrLG6	- 9112802-9112967_9114325-9114682_9115244-9116121	CAAAAACTAAAATAAACTACTTTTTACAAATTAAAATAAATTAATACTTCTATTAATTTTTTTTTTCAAATACAAAATAATTCTAAACTAATTTTCATTTTTCAGAATTAATGCTATATAAATTCTTTTTGTTCGCAAAAAGGTACAATAATATTCTATTTCTATGAAAATTTCGTATCTTCGTAAAAAAGCTTCTTTGTTACTAGGCTAACCTAACCTAATGTACGCAAACATCCGAAAAATAGTCCTAGACGGCTTTATATTATACTTTCTCTTGTGAAACGATGCTGCAGATTTCGGTGGAAAAGTTCTAACCAACGATCCAGGTTTGGACTCGACACCTTTTGTTAACCGAAGATCATCTTTCGTTGGCGCGTCCTTTAAAATCAGATAGTGGGT…
>TCONS_00027069 database_lncRNA_id:"100577767" GL630435.1 - 5464-5652_6492-6661_6913-7005_8025-8134	TCONS_00027069	XLOC_009164	database_lncRNA_id:"100577767"	GL630435.1	- 5464-5652_6492-6661_6913-7005_8025-8134	TTTAGATAAAAATTAAAATTCAATGTGTTTCTTACAAAAATTTGATGGAAGAAGCAAAATCAATGATATTTTCTCTCTGAATTCGGGACGAGACGGATAAGATAACAACGATCATCGTTTAATTTAATAATGGAGATTAAATAATTAATGGAATGATTTCAAAAGTATGATAGGTTATGTATTACGACTTTCGTGCAACTATGAATAGAAAATATTTTGTTTTCGGGTAATCGATGATTCATGACTGTACATCGCTCGACATATTTCGATGAACTTCAAGCATATCTTCTTCGTTCAATTCGATAATCGAAATCGCAGTGTCAGAGATGTCATTTTTCCGTCAAGAATCGTGTTTTTGGATGTTTCGCTTCAGATTCCATTTTCCTCTATTTTTTTTGG…
>TCONS_00862529 database_lncRNA_id:"100577781" chrLG7 + 2620200-2622140_2622233-2622846	TCONS_00862529	XLOC_220946	database_lncRNA_id:"100577781"	chrLG7	+ 2620200-2622140_2622233-2622846	AGATCCTTATCAACATACCTCGCTCGCTTCTTTTTTCCTGTCGGATAGTCGTTCGTACAGGAATTGCTTGTTATTCCAACAACAAAAGTGATTCGACCGGATTATTACAAGAAAGTGTAGCAAATGCTTATAATTCGATGGAATGCATCGAATAACTCGGGATTACATTGTGGTTGGACAGAGATCATCGAGGAGAGGACGAAGCCACGTAGTGGACGAGAGAAGGAACGAGGTCGCGACGCGTTGGCGAGAAGAAAACAGCTGGATCGCCATTCGTTTTCGCGGTTATTGTAGCAGACCCGGTTCGCAATATACATACACTTTGTTATCGATGTGTGTATACGTGTAAGCGTGTACCTACGAATTCCTTCCGGAGCCATGCTCGTTCCACTAAATACG…
>TCONS_00862530 database_lncRNA_id:"100577781" chrLG7 + 2620200-2621458_2621582-2622140_2622233-2622846	TCONS_00862530	XLOC_220946	database_lncRNA_id:"100577781"	chrLG7	+ 2620200-2621458_2621582-2622140_2622233-2622846	AGATCCTTATCAACATACCTCGCTCGCTTCTTTTTTCCTGTCGGATAGTCGTTCGTACAGGAATTGCTTGTTATTCCAACAACAAAAGTGATTCGACCGGATTATTACAAGAAAGTGTAGCAAATGCTTATAATTCGATGGAATGCATCGAATAACTCGGGATTACATTGTGGTTGGACAGAGATCATCGAGGAGAGGACGAAGCCACGTAGTGGACGAGAGAAGGAACGAGGTCGCGACGCGTTGGCGAGAAGAAAACAGCTGGATCGCCATTCGTTTTCGCGGTTATTGTAGCAGACCCGGTTCGCAATATACATACACTTTGTTATCGATGTGTGTATACGTGTAAGCGTGTACCTACGAATTCCTTCCGGAGCCATGCTCGTTCCACTAAATACG…
>TCONS_00887367 database_lncRNA_id:"100577781" chrLG7 + 2619253-2619856_2620202-2621147_2621218-2621458_2621582-2621901	TCONS_00887367	XLOC_220946	database_lncRNA_id:"100577781"	chrLG7	+ 2619253-2619856_2620202-2621147_2621218-2621458_2621582-2621901	CGATCGTTTACAATTCTTTGTAGAAAGCAGAAGAATCATAAAAGGAGTGGCCAGAATTTTCTTGGTTGATAAAATAGGAAAATATTACAAATTCTTTCAATCGCGAGAGAGACGAGAGAAACGGCTGAGAAACGCGAAGAAATGAAAAGAATAATCGTGCGAAAGAACGTCAGAGAAATAATACGTGATTAAAATGGCGGAGAGAATATTACGCGGTTGGATAACGTATGATGACAAGATGGTGCAAAGGATAAAATTGTCAAAAAAAGAAAAAGAAACGAAGAATAAAAGATTCATTTCAAAGAAAAGAGAAGAAGATAATCCAAACACGTTGGAACATACACGCGCCAGTCAAGAATATGAAGAATATAAATAAGAGATATAAATAATCAAGTATCA…
>TCONS_00140340 database_lncRNA_id:"100577782" chrLG1 - 5870323-5870680_5871121-5871144	TCONS_00140340	XLOC_040763	database_lncRNA_id:"100577782"	chrLG1	- 5870323-5870680_5871121-5871144	GCTACTGCGTCGCTTTACAAACGCGTTTCCTATTGAAAGCTGTTTGAACATTTATCGTGGCAATTATTAGTTATCCCAACACTACTTTCTATTCATTAAAATACTCACAGCATCAACAAGAGAAGCGAGAAAACATACAATTTAACACCGGGCACAGCTTCTAACAGGATCTTTGCGCAACGAACAGAGCAAATATAATTGGATCTAAACGTGTTCGGAATTCATGAACCCTGCTAATTATGTTTGACTTACGAATTTGAAATAAATTCATGAAATGGTACAGAGAAAGAAGATTGTATGAGAAATTATAATGCGTATTTCTTCGTGACATCTTTTGTGTCACCTTAAAGAGTTTCAAAATAAATAGTAAAAAAAAAAAAAA
>TCONS_00026981 database_lncRNA_id:"100577794" GL630435.1 + 23255-23332_23493-23687_23797-24011_24356-24462_25257-25335_26731-26831	TCONS_00026981	XLOC_009146	database_lncRNA_id:"100577794"	GL630435.1	+ 23255-23332_23493-23687_23797-24011_24356-24462_25257-25335_26731-26831	AGCAGTGCGCATCTTAGTATGCATGCTGCCAGATTACCATCGAAATTCGTGGACATAGGACGTGGATTATCGGTATAAGTTGCACGTTTATATGACAGTTACCGGTTGTTTGTACCATAAACATTTGAACGAGAATTTCCTTTCAAATATTGTTTTGTTTCAATATTACTTGAATCTACATTTATTCTACGATTTTGATTTTCATTTGTACAAATTATACTCGATTATAACTTAACAAGTGATAGTCGATTTGGTTACGAGCGTGAACATCTGAATGCAGACATGACGTATAGTTTTTACGATAATCTTTACTAGGAAATTGGAGATTCGTATTCGTAAATGCTTGGCTTTCGTTGATCACCTACCGAACATCGGTACCTCTCCTCCTCCCCTATCGCC…
>TCONS_00027018 database_lncRNA_id:"100577794" GL630435.1 + 23282-23332_23493-23687_23839-24011_24356-24462_25257-25551	TCONS_00027018	XLOC_009146	database_lncRNA_id:"100577794"	GL630435.1	+ 23282-23332_23493-23687_23839-24011_24356-24462_25257-25551	GCCAGATTACCATCGAAATTCGTGGACATAGGACGTGGATTATCGGTATAAGTTGCACGTTTATATGACAGTTACCGGTTGTTTGTACCATAAACATTTGAACGAGAATTTCCTTTCAAATATTGTTTTGTTTCAATATTACTTGAATCTACATTTATTCTACGATTTTGATTTTCATTTGTACAAATTATACTCGATTATAACTTAACAAGTGATAGTCGATTTGGTTACGAGCGTGAACATCTGGAAATTGGAGATTCGTATTCGTAAATGCTTGGCTTTCGTTGATCACCTACCGAACATCGGTACCTCTCCTCCTCCCCTATCGCCATTACTAATTTCGGTAATCGAAATTATATCGCAGTCCGCCATTTTGTCGTTGAAAATTAACGCGACAAT…
>TCONS_00027105 database_lncRNA_id:"100577794" GL630435.1 + 23247-23332_23493-23687_23797-24011_24356-24462_25035-25084_25257-25512	TCONS_00027105	XLOC_009146	database_lncRNA_id:"100577794"	GL630435.1	+ 23247-23332_23493-23687_23797-24011_24356-24462_25035-25084_25257-25512	CGAGACGAAGCAGTGCGCATCTTAGTATGCATGCTGCCAGATTACCATCGAAATTCGTGGACATAGGACGTGGATTATCGGTATAAGTTGCACGTTTATATGACAGTTACCGGTTGTTTGTACCATAAACATTTGAACGAGAATTTCCTTTCAAATATTGTTTTGTTTCAATATTACTTGAATCTACATTTATTCTACGATTTTGATTTTCATTTGTACAAATTATACTCGATTATAACTTAACAAGTGATAGTCGATTTGGTTACGAGCGTGAACATCTGAATGCAGACATGACGTATAGTTTTTACGATAATCTTTACTAGGAAATTGGAGATTCGTATTCGTAAATGCTTGGCTTTCGTTGATCACCTACCGAACATCGGTACCTCTCCTCCTCCC…
>TCONS_00027106 database_lncRNA_id:"100577794" GL630435.1 + 23255-23332_23493-23687_23839-24011_24356-24462_25035-25084_25257-25335_26731-26831	TCONS_00027106	XLOC_009146	database_lncRNA_id:"100577794"	GL630435.1	+ 23255-23332_23493-23687_23839-24011_24356-24462_25035-25084_25257-25335_26731-26831	AGCAGTGCGCATCTTAGTATGCATGCTGCCAGATTACCATCGAAATTCGTGGACATAGGACGTGGATTATCGGTATAAGTTGCACGTTTATATGACAGTTACCGGTTGTTTGTACCATAAACATTTGAACGAGAATTTCCTTTCAAATATTGTTTTGTTTCAATATTACTTGAATCTACATTTATTCTACGATTTTGATTTTCATTTGTACAAATTATACTCGATTATAACTTAACAAGTGATAGTCGATTTGGTTACGAGCGTGAACATCTGGAAATTGGAGATTCGTATTCGTAAATGCTTGGCTTTCGTTGATCACCTACCGAACATCGGTACCTCTCCTCCTCCCCTATCGCCATTACTAATTTCGGTAATCGAAATTATATCGCAGTCCGCCAT…
>TCONS_00692248 database_lncRNA_id:"100577798" chrLG4 + 7292588-7292814_7293196-7293420_7294053-7294180_7331438-7331508_7445148-7445473	TCONS_00692248	XLOC_172362	database_lncRNA_id:"100577798"	chrLG4	+ 7292588-7292814_7293196-7293420_7294053-7294180_7331438-7331508_7445148-7445473	ATTTCTTTGTCGAATGTGCAAGCGTTAATTTTTTTAATTCAATATTATAAATTTGTGAAACATAGAGAAGTGATAAAGTGATTTAAAGATGTGTTTAAATTTCAAAAGTGTGATTATTTGTAATATATATTACATGCTCTATTTTCATATATATAAATTATTTTACGTAAATTTATTGTACGTTACGTCGCAATAAGAACAATTATTCTGTCAAGGATAAACGTGTCAAGTGCAATTCAATGGTCGGTATAGAAGTTTTCTGCTAAAGCATCAACCGTTGGAACAGAATCGATTTTACCCTTTCTCTGAAGATGGCAATAACTCCCACAATCCTATGAATATTAATACTGGATAAAACTATGAGCAACTTCAATGATCGATTAACGGGCAAACTTCGTC…
>TCONS_00081759 database_lncRNA_id:"100577807" chrLG1 + 260832-261709_261823-262859	TCONS_00081759	XLOC_025646	database_lncRNA_id:"100577807"	chrLG1	+ 260832-261709_261823-262859	GGTTAAGATACGAATCGTCGTTAGATCGCTATACCTATGACGAATACCACGATAGAAAGAAAGATGTGTGCGAATATAGGCGTTCCTTCCAAATTAACCAATCAGACGCGCGTCTTCTTCGCGAGACTTCTTTCCACCAATGAACAGTACTTTTTCGATCACCTATTCTATCCCTTCTATTCGCCGTCTAACCTAACCTCGAAGTTTCTGCGCAAAAACGGATTCTCTATTCGCGAAAACATCTCGTCGCAATGTGATATTCTTCTCTATGTAAAAACGATCGATAAAAGAAAAAACAAATTCAACGATACAAAATATATTATTACGAATGTATAGAACAACGAAAAATTATTCGTCACCGTTATTTTTCTCGTGTGTGCTGTTGTACCATCGTCGAAA…
>TCONS_00081760 database_lncRNA_id:"100577807" chrLG1 + 260832-261327_261463-261709_261823-262791	TCONS_00081760	XLOC_025646	database_lncRNA_id:"100577807"	chrLG1	+ 260832-261327_261463-261709_261823-262791	GGTTAAGATACGAATCGTCGTTAGATCGCTATACCTATGACGAATACCACGATAGAAAGAAAGATGTGTGCGAATATAGGCGTTCCTTCCAAATTAACCAATCAGACGCGCGTCTTCTTCGCGAGACTTCTTTCCACCAATGAACAGTACTTTTTCGATCACCTATTCTATCCCTTCTATTCGCCGTCTAACCTAACCTCGAAGTTTCTGCGCAAAAACGGATTCTCTATTCGCGAAAACATCTCGTCGCAATGTGATATTCTTCTCTATGTAAAAACGATCGATAAAAGAAAAAACAAATTCAACGATACAAAATATATTATTACGAATGTATAGAACAACGAAAAATTATTCGTCACCGTTATTTTTCTCGTGTGTGCTGTTGTACCATCGTCGAAA…
>TCONS_00098671 database_lncRNA_id:"100577807" chrLG1 + 260872-261746_261823-262864	TCONS_00098671	XLOC_025646	database_lncRNA_id:"100577807"	chrLG1	+ 260872-261746_261823-262864	CGAATACCACGATAGAAAGAAAGATGTGTGCGAATATAGGCGTTCCTTCCAAATTAACCAATCAGACGCGCGTCTTCTTCGCGAGACTTCTTTCCACCAATGAACAGTACTTTTTCGATCACCTATTCTATCCCTTCTATTCGCCGTCTAACCTAACCTCGAAGTTTCTGCGCAAAAACGGATTCTCTATTCGCGAAAACATCTCGTCGCAATGTGATATTCTTCTCTATGTAAAAACGATCGATAAAAGAAAAAACAAATTCAACGATACAAAATATATTATTACGAATGTATAGAACAACGAAAAATTATTCGTCACCGTTATTTTTCTCGTGTGTGCTGTTGTACCATCGTCGAAAGAAGAACATAGATCGCCGCGCTGCTCGGATCGTAAATGTG…
>TCONS_00372159 database_lncRNA_id:"100577808" chrLG13 - 797657-799407_803012-803075_803341-803573_826771-827149	TCONS_00372159	XLOC_105922	database_lncRNA_id:"100577808"	chrLG13	- 797657-799407_803012-803075_803341-803573_826771-827149	AAACATTTTAAAAATGTCTGAAAGATTTCGACTGACATTTATCGCTAATTGCACGAATCTTAAACGATAAATATTTTTAAAAAAAAAGTGTAACGAAAGTATAAATCTAATCAATCTCTTCAATCCGTTCAATCTTTATCGAATACAAAAATTAACAAGCAATATTTGCCAAGTGAGAACCGTGTACGCATTGCGGACAAAGAATCGGGAGAATTCTCGTGGCCAATCGGAAAGAATATTTCGCTCGAGATGCAAACCGGGCTTTATCTCGCTGCAGTACGACATCCGTCGCGAAAAGGAAATCTCGCGGCACCTGTAACGAGAAACAGCAAGGCTGATCCCGTCCAAGAGTGAGGTTAGAGCTGAGAAACGGTCAAAGTTTCTTTTAAAACTATGCTT…
>TCONS_00083362 database_lncRNA_id:"100577824" chrLG1 + 6519374-6519447_6520713-6520917_6521694-6522054	TCONS_00083362	XLOC_028307	database_lncRNA_id:"100577824"	chrLG1	+ 6519374-6519447_6520713-6520917_6521694-6522054	GAAAATGAGAGCGAAAAAATATTACTGCAGAGAGCAGAGTCACGCAATTTCAGTTGTAAAATGGGTGTAACGAGAAAAGTTTCAGGGATGGCATACACAAAAGCAGCGTAAAGTTCAAGAGAAGCGAGGTAAAAAAAACAATGGAACAACGAGCAACAAATTTGTGAAATCTACAGTTTATCTTATTCAACTAGTATTATTATTTCTGATACGCCTATTGACGTGATCGTCCACTTATCGTCGTTGTCCGATGTGCTATTAATAGACCGTATTCACCAGTTAACCACTGTTTATACCATAGTCACCGGGGTCGGCTCATTAACTTCGATAACGAGGAACCTGGATCTACTAAACGCGTCTATCGCCTACCATGTTGACTTCTTACTCGGTCAATTTACC…
>TCONS_00314327 database_lncRNA_id:"100577828" chrLG11 - 12462601-12462685_12462835-12463058_12463132-12464621	TCONS_00314327	XLOC_081742	database_lncRNA_id:"100577828"	chrLG11	- 12462601-12462685_12462835-12463058_12463132-12464621	TTATTTTTTTTATTTTATTTAGAGAAATAAGATTTGAAAAATATATCATTATTTATTCACTTTCTACTATTATAGCGATAAAAGATCGTAAAATCGACGATAATTCAGGAAAGATTCATCCATAATCAAAACTGTACAATCATTAGCAAGAATAAATGATTTTCCTATCTTTCTCGATTGTTCTCCAATCGTATTCCCTATTCACGAATTCATATTTTCCAATGAAAATAATACACAAGATAATAAAACCTCTGGGGTCGATTTATATTATCGATTTCGTTGATCTCCTCTATCCAGGTCACTGTATTGTGCAAACAATCGTCTGTGAATAATGCAAAAGAAAGCGAACGTATTATCGTTACTTTTTTTTCTTTTTTCTCCGCCGACGATAACGACGTG…
>TCONS_00828054 database_lncRNA_id:"100577843" chrLG6 + 9080592-9083145_9083218-9083406_9083477-9083715_9083822-9083906_9084284-9085952_9086223-9086395_9086823-9087277	TCONS_00828054	XLOC_203794	database_lncRNA_id:"100577843"	chrLG6	+ 9080592-9083145_9083218-9083406_9083477-9083715_9083822-9083906_9084284-9085952_9086223-9086395_9086823-9087277	GTGGTAAATTATTTAATCAAAAGCGAATAAGAAACGCTCTTCAACGCTCTTTATTCATATCGATCAATCTTGAATACAACATATAATGTAATTATTTATACGGATCCGAATGATTTCACATATTGAAAATCACGATCCAAGAAATCAAGCGAAAATCAGAATGCCCTCAATCAGATCCCCTCGCGGAGAGTATTGTTTTCCTTTAAAACTCGCCCGTCGTAAAAATAAACTATTGTTAAAGGCATCGAAATCCCGGCGCTGCGAGAAAACCCCGTCGTCGTCTCCGCTTTGTGGGACGACGCAAACCCGTCACTGGTTTTTCACCAGTTTTAATTCATTACAAAGAGGGTGTGACTCGGACATATACATAGGTATACACGGAGGAGGAGAGATCCCGGC…
>TCONS_00130093 database_lncRNA_id:"100577851" chrLG1 - 4276503-4277887_4278666-4278884	TCONS_00130093	XLOC_040089	database_lncRNA_id:"100577851"	chrLG1	- 4276503-4277887_4278666-4278884	GATTTTATTTCGCAAAGGATTTTTTTACTTCCTCGCCATCACGTTCGAGTAATGTAACAGCGGTGGATCGAATAATTGGGATGCGGGAAAGTACGGGTTTAACTTTCGGCCAACTTGGAATAACGCGGCCTCGTCGGCTGTTCTCCTGTTCTACGATATCGCTTTCGTTCGCTGAAACGTGAAACCGGGAAAATGCGGAACGAACGATGCGGTATTTAGGAGAAGGAAGTATGAAAGTTTCGAGAGTTACGAGAAGTAGATAAAAATTGAAAGGAGAAGAGGAAACGAGGTTACGAAGAATCTACGCTCAAGGTTTCCCTCTGCCAGGAAACCGACCGAACAATGAAGACGATGCGGTAAGCTCCCGTTTTTAAGCGGTCGTTACTTGTGTATTACGAT…
>TCONS_00450348 database_lncRNA_id:"100577863" chrLG14 + 4244859-4244904_4246174-4247150_4247674-4251469_4251675-4251702	TCONS_00450348	XLOC_114332	database_lncRNA_id:"100577863"	chrLG14	+ 4244859-4244904_4246174-4247150_4247674-4251469_4251675-4251702	CTCGTCGATATTAATACAGTATACGAACGACTGCCGTATCGAGAAGGAATAGAAAGAGAAATCAATCGTCTCTATTATCTCTATCATCTCGAGCAGATCGATATCTCTCTTAACATCCGATACAATTTACATCTGGCACATTACAACCACATCCTTTCATCGTCGAAACATAAAATTCTGCCTCTGCCCTTACGCGTCGTGAAGAAAAAGAAAGTAAGACAGAAAAAAAGGGGGAGAGAGAAAAAGAGAATAAATCTGCCAGCCTACATACTTTTCCCGATCGATACTCGTCGATCGTCAAAGAGTCGCACGACCGTAAAGAAACTGTCGTTCGCCTCGATTTCAATGCATACACATCTTTTACGTGCTCGATAGAGTGTGATGCAGTGTGACGTTCGA…
>TCONS_00649722 database_lncRNA_id:"100577890" chrLG3 + 11057610-11058105_11059414-11061506_11061594-11062155	TCONS_00649722	XLOC_160924	database_lncRNA_id:"100577890"	chrLG3	+ 11057610-11058105_11059414-11061506_11061594-11062155	ATTCCTTGCAGGATATCACGTTACTTACGGAACCATGATCAATCGTTCGAACTCGGTCTATGACTATAGAACGAAAGTTGCAAGTCGTAAATCGTTGCGAAAGTTGCGAACGGTGTTGCTCGTGATAGCAATTCGGTTATGATATATGTTTAATGTGAAAAAAGGGAAAAGTGTTTCACCGTTTATTTTAGTTTAATTTAATCGAAATATATGATTTATATTCAATTATATTCGAATAATAGATAACAATCGACAACTAGTAATTTTTGTGTACAATATTACCTACTTAAGAAATCTATAGGAAACTCTCTAAAATTAACTTTTCTAATTGACTTTAATTTTTCAACGTATTAAATTGAAATTAAATTATATTCACAAAATAGCATTGTTTAAAATTTT…
>TCONS_00093580 database_lncRNA_id:"100577891" chrLG1 - 12762022-12763112_12763193-12763725_12763842-12764707_12764890-12765082_12765409-12765645	TCONS_00093580	XLOC_043912	database_lncRNA_id:"100577891"	chrLG1	- 12762022-12763112_12763193-12763725_12763842-12764707_12764890-12765082_12765409-12765645	ATCGAATATTCAATATATTGCTTGTTTGTATCGATAGATTACACATCGATTTTACACATCGACCGAGTTTCTTAACTCTCTTCACATTCTTCATCGACGCAAGCGCAGAAAGTTGGTTGGAAATCGAGAAAGTTCACAACGTATATCGATGACGAAAGATCATGAAATATTTTGATAATTGTATACAGAAGATTGTTTCACAATTATATTATAATAGTGATTAAATAACTTGATTTTAAATTCTTATTTATAGCACAGAATCATAGTACTCGTTTACAATAAAGAATAATATTTAAAAGAATTTGAATATATTTGATCCCGATTAATGTTCAAATATGAACGCGAGTAAAACTAATTAACAGTTTTCAAGATAAACAATGTTTACCATAAAAGGCAGAA…
>TCONS_00277783 database_lncRNA_id:"100577914" chrLG11 + 12531435-12531857_12531924-12532214_12532527-12532696_12532803-12532886_12535569-12535854	TCONS_00277783	XLOC_075678	database_lncRNA_id:"100577914"	chrLG11	+ 12531435-12531857_12531924-12532214_12532527-12532696_12532803-12532886_12535569-12535854	CTTCCTTTCAACGATAATTAATTATCGCTAAATAAATCGATCTTGAGTTATGACGGGTCAAGGTAAATCTCTCTTATCATTCTCCGTATCGGATATTATTGGTGGCGAGAATATAATATGGTATATGGGTCATGGGTGTGTGATTCTGGATCGGCATGCGAATATATATACATACTTTTACCACTTTGTCGGATTAAAGGTTGACCCGGCACGAGACTACGATCGAAATAACATTGGGATCGTACAACAGGGCGGGAAGGCAGAAACTGCGATATACGTAAAACCTGGTCACACCTTAAAACCTGGAAAATCAGATTGGGGCGTGGGCCATCGTGACGCAACGATTCTCCTTATCTACACCTTCGTAAAAATAATGAAACTCGCTCCTCCCTTTTTTTT…
>TCONS_00316877 database_lncRNA_id:"100577914" chrLG11 + 12528783-12530440_12530538-12530879_12530965-12531048	TCONS_00316877	XLOC_075678	database_lncRNA_id:"100577914"	chrLG11	+ 12528783-12530440_12530538-12530879_12530965-12531048	TGTTACTCTATACATTCGAACCTTTTACATTTTTACGGAATAATTTCGATTCGACGACGAGAGAGGGCAGGAGTCTCGATGGAAAATTTTACGCTACACTAGCGAACTCTATAGTCTCGGTTTTGGGATCAGATCGGAGAATGGTCGCGTAATTAACTTTGATAACTTTGAGTAATATCGCTCACAGGATCGACGTAATAATGTCAATTAAAGTGGATTGCCGTCAGTCATGCAGCTCGAGGTAAGAAGAACGAAAAACAACAAGCATCTAAAAGGGGGAAGAAAAAAAAAGAAAAAAGAAGCGAGAATGTCGAAAAAATTTACGAGCTTAAAAGGGATTTATCGTCGCAAATATTTTCCGTCCACCTTTCTCACTTCCCTTCCTTTCCCCTTCGCCGA…
>TCONS_00829691 database_lncRNA_id:"100577970" chrLG6 + 16995598-16996372_17011084-17011540	TCONS_00829691	XLOC_207933	database_lncRNA_id:"100577970"	chrLG6	+ 16995598-16996372_17011084-17011540	TTGAAATCACGAGTTATTATTGAAATTGTGCACGAATTAATTGGCCCGTTCTTAACCTAGAATCACGTTCGATTCCGAAACCGTTTCGTTGCGCGCGCGAATCGTCGCAGAAAAGTCGTACGTGCGAAATGTAACGTAACACATCGAAGGAGAGTTCGCACGGGTCTAGTTTAACGGTTGTAATACGAAATCTTTCGATGTTATTTCCCTTGGTTTTTGCGAGTTTTTCTTGTCGATAACGTTAACAAGCGAATGGCTGTTCAAACGGATTATAACAAGAACGTATCAATAACGGCACGATCCAAGATTATAAACGTAAACACTATTACGCGTTTCTTATTATCTTGCGACAAATGTGTATTAGAACCGGTGCCTCCTTATTCGTCAGTCGAACTACGG…
>TCONS_00647993 database_lncRNA_id:"100577971" chrLG3 + 653177-653540_653838-653925_705025-705258_711299-711638_714292-715591_715799-715816	TCONS_00647993	XLOC_156537	database_lncRNA_id:"100577971"	chrLG3	+ 653177-653540_653838-653925_705025-705258_711299-711638_714292-715591_715799-715816	CTATATTGTAAATGAACGTACAAAATCAATTTTATTTTGTCAAATTAAATCATCGTAATTATATTGTATCGTACGAATAATACGTATTACGCATTACGTTTCTAAATGTCGTTTCTATCTGTAATGTTTATTTCTTTCTTTCCTTTTCGTTCAATGTTATATTGAAGAGTAATAACATTTATCTAAAGCTTTTCCACGAAATTTAGAGTTTGTTTTCGTATTATATTGCTCGACATGTTTCGACGTGTTGACGAACATTTCCCCTCCCTAATTCGAGAATCGAAATTGCGATGTGATGCGTCATTTTGCTATCGATATTCATAGTGGTTAGTTCCATTTTGTGAGACGATTTGTTTGCTGCGTAAACAGAATACCTGATGCAACTTTATTGATGCAACT…
>TCONS_00922996 database_lncRNA_id:"100577978" chrLG8 + 7752889-7753513_7753802-7753969	TCONS_00922996	XLOC_236666	database_lncRNA_id:"100577978"	chrLG8	+ 7752889-7753513_7753802-7753969	TATCTCTGGACCTATACCACTCGTAAACTGGAGAGTGAAGCGCCTGCGCGGGCATCGAGTTTACGAACGGAACCGAAAAATTGCGAAGATCAACGACCGTAACCGATTCTCTTAGTAACTCGCAAAGCGCTCGAAGCGGGACGCTTTAGTCATTTTTTAACGCATTTTTCGCGGTCCCGTTACCTTTCCTTTCGCTCGCGATCTCTTCCTCTCTTTCAACCGAAAGAAAACGTTTTCACGAATCTAAGAACAACTAGGTCACGCGCCATACATCTAACGACTTTTTATCCCGCAACGATGCGTCTCTTTTCAACGACCATTGCCGAAAGTGAGTATCGTGCATAGAACAGTGGAAGAAAGATGGCGTCGGGCTATCTGGAATGGAATATACCGAGGAAA…
>TCONS_00488082 database_lncRNA_id:"100577987" chrLG15 + 4936501-4938402_5011344-5011735_5011862-5027374	TCONS_00488082	XLOC_124247	database_lncRNA_id:"100577987"	chrLG15	+ 4936501-4938402_5011344-5011735_5011862-5027374	ATATATCGTTACGTTCGATTCATATCGCAAACAAATATATTGATCCACATGAATAATTATGGATTATACACATATATCGTATTTTACATACAATTTTACATACAATTTTCTACGAAAACACGAAAAAAGTACAGAATACGCCATTTGACGAATGACGAAATTCGGAAGCAATATGGCGTACAACGAACTTCGCAAAACGATATTCTAATCAATTAGGAAATTATTATATAAAACTCTTAACTCACCATAGAAGACAGCTACAAATGATGAGCATCTCGTAATTCTGGATGCAGAACACTTCAGATTCTTAAAACACTAATGAGAACACTAAAATATCACACAAAATTCGACCGAGACGAAATTGCGACGCACATTTTATAATTTCAACGTTGAACTGTA…
>TCONS_00962683 database_lncRNA_id:"100577999" chrLG9 + 5076459-5077597_5077708-5077827_5078021-5082608	TCONS_00962683	XLOC_248330	database_lncRNA_id:"100577999"	chrLG9	+ 5076459-5077597_5077708-5077827_5078021-5082608	TACCGTTCTATCATCTACCACTATAATTCACTAATACTACTCGTCCAGAACTACTTGCTTAAAAATTTTCATGGCTCGAAAACTTTTCCAAAAACATATGCCCAACTCAATGCCTCGATTCGCCCAATATAAAGAATAATGATCGATTCTTTTGGGAACATAATAAAAAAGTAATCGGCAAGGTCTGCTGAGACTGTGGGCTACATACCCGCATTCCCTGCATTCTAGACATCGCCCTGAGTGGCCTTAGGGCCCTTAGGGTCCTCATTGTTTTGAAGGCTTGGATCCCGCCAGCGCCACAGAGCGACGCTACGAAGTTAATGAGTGACACCTGCGAGCGAGAAACGAGAGCGGATCACAGCAACAGGTAGACAGACAGGCTACTCGCGATACGAATTC…
>TCONS_00052225 database_lncRNA_id:"100578001" GL630814.1 + 6494-7370_7974-8930	TCONS_00052225	XLOC_016620	database_lncRNA_id:"100578001"	GL630814.1	+ 6494-7370_7974-8930	ATATAATCAATGTTTGAGATTAATTTAAACGGGAAAAAATTTTCAATATGGACGCTATGATGACAGTTTGTGTTTTATAGGAAAAAATTTAAATTTCAAGTATCTATATCGTGAATAGAGAACATATAGCGTATACAAAGCAAATTGTATTTCGAAAATAAAATTATACCTCATTTTTTATTCTCGTTTCATTTATATTCATAAATCGGGAACAGGGATTAATTAATTAAAAATTGAGATAAATTTTTTAATACATCAATTGTGCTATGCTCGTTGATATTCCATGTTGCAATAGAATTTTCAATGAAAATAATTTCTAGTACTACCATGATTCTCGAAAGATTCCTATATTTTCTAAGTTACTTTCACGAATGATATGCAGAATAATTTCTAATCGGG…
>TCONS_00093596 database_lncRNA_id:"100578016" chrLG1 - 12807316-12807559_12807929-12808036_12808250-12808417_12808479-12808612_12809223-12809671	TCONS_00093596	XLOC_043939	database_lncRNA_id:"100578016"	chrLG1	- 12807316-12807559_12807929-12808036_12808250-12808417_12808479-12808612_12809223-12809671	CTAAAATGTTATATAAAATAAAATACCTTCAAATTCATATTAATTCATTATGAGAATTACCATATTCCCTTTGTTTCTCCGTTTCGTCCTGAAAACAGCCTCTTAATTTAAGACAAAATTAATATTAAGCGTAATTGCGAGAGTAGGATTTCACTCTTAGGACCAGAGTAAAACACATTATATCAAACCGGAGCAAAATACGTCCAATGTACGCGAATGAGACATTAATTTGCCATACGAAGGATTATGGCTACGCTTTATCTTCCCGTTAATCCTGATTTAGAGATTCTGCTACGTACGCCACCTAACCTATTCGTCGGGAATTAAGATGCTGGAAATACGAGTTGCTTTGTCGTTTTGACATAGCTTATGTCAAACTTGGAGATTAACTTTTGTTGT…
>TCONS_00014763 database_lncRNA_id:"100578019" GL630382.1 - 10742-11026_11371-11535_11805-12056	TCONS_00014763	XLOC_004948	database_lncRNA_id:"100578019"	GL630382.1	- 10742-11026_11371-11535_11805-12056	ATTACATCGAAATTAAATTGATTTTCTATCGTTATTAATAATCCATACTAAAAACATCCGAAATCCGGATTTGTATTTAATTATTGTTTTATTTTAACATTATTTAATATAAAATTGGTTTTACGATTCTAATTTCTATTTATATTTGTGCAGATCATTTGTGCAGTTTAATTAAATAATGGAGATTAAATAATTAATGGAATGATTTCAAAAGTGTGATAGGTTATGTATCACGACTTTCGTGCAACTATGAAAATATTTTGTTTTCGGGTAATCGATGATTCATGACTGTACATCGCTCGACATATTTCGATGAACTTCAAGCATATCTTCTTCGTTCAATTCGATAATCGAAATCGCAGTGTCAGAGATGTCATTTTTCCGTCAAGAATCGTGTTT…
>TCONS_00000114 database_lncRNA_id:"100578029" GL630349.1 - 527801-528521_532556-532997	TCONS_00000114	XLOC_000449	database_lncRNA_id:"100578029"	GL630349.1	- 527801-528521_532556-532997	AGGCAATGAGCACGTTCATTGGTTTGCTTCAGAGGCTGGTCCTCGTGGGGGATGCCTTGACCAATCATCGTCCGTGAGTCACCACCGTACTACCGAGCAAACTCTACTCGAAGATTTTCCAGCATTCTATCGCGAGCCGTTTCGCGGTGCGTTTTGCTTGGTTTTCTCGTCTTTGTATCTATGTTATTTTTTGATTTTCTTGTTTGTATCTATGCTCAATGCTCATTTTTTCTTATATATATGTGAACAATTTCACTAGTATTGAAAGTTCGTTATAAAAATTTCGTGAATTTTTCGAGTGTATAAGTGTCAAAAATTTTAATGGAATTGTTAATTGTGTGATTCGAAATAAATCAAGTGTTATAGGTTATTCAAAATGGATTTCGAAAATGAAAATTT…
>TCONS_00000329 database_lncRNA_id:"100578029" GL630349.1 - 527801-528277_528344-528521_532556-532997	TCONS_00000329	XLOC_000449	database_lncRNA_id:"100578029"	GL630349.1	- 527801-528277_528344-528521_532556-532997	AGGCAATGAGCACGTTCATTGGTTTGCTTCAGAGGCTGGTCCTCGTGGGGGATGCCTTGACCAATCATCGTCCGTGAGTCACCACCGTACTACCGAGCAAACTCTACTCGAAGATTTTCCAGCATTCTATCGCGAGCCGTTTCGCGGTGCGTTTTGCTTGGTTTTCTCGTCTTTGTATCTATGTTATTTTTTGATTTTCTTGTTTGTATCTATGCTCAATGCTCATTTTTTCTTATATATATGTGAACAATTTCACTAGTATTGAAAGTTCGTTATAAAAATTTCGTGAATTTTTCGAGTGTATAAGTGTCAAAAATTTTAATGGAATTGTTAATTGTGTGATTCGAAATAAATCAAGTGTTATAGGTTATTCAAAATGGATTTCGAAAATGAAAATTT…
>TCONS_00885492 database_lncRNA_id:"100578053" chrLG7 - 3803538-3803935_3804121-3804162_3804236-3805612_3805690-3805763_3805893-3806388	TCONS_00885492	XLOC_227085	database_lncRNA_id:"100578053"	chrLG7	- 3803538-3803935_3804121-3804162_3804236-3805612_3805690-3805763_3805893-3806388	CCCTCCCTCTGTCTCTCTCTCCCCCCTTCCCCCTCGTGTGTATCCGATACGACGTGACACCCTTTGTCCCCCCTTCCACCACGCGATACATCTTCCCAACTTCGCCGACCAAACTTATGTACACTGTTCTCAGTACTCGCTGCCAGTTATGCTTTCGAAATGCATGAATTGTTCCTCCGTCGAGCGAAATTGATGGTTATCTCGTGGCGCACGCTTCGCAATTTACCACTAGCAAATTGATTATCTTCGATCTCGGAGGTTGCCGCGTTGTTTTGTGTGGACGGGTGACATTGAGGGAAAGGATTGTTTGATTCATGGGAGGTGGGGAAATTTGTTGACACGACGAGCGGAATAAACTGCGGTCCCGTGATAATAGCACGTTGTTATTTCCGTCCTCGG…
>TCONS_00126427 database_lncRNA_id:"100578057" chrLG1 + 12788162-12789711_12789848-12790422_12790765-12791345	TCONS_00126427	XLOC_030547	database_lncRNA_id:"100578057"	chrLG1	+ 12788162-12789711_12789848-12790422_12790765-12791345	GATTGATATATAATAACAAGTTTCATAAATTTAAATAGATTCTCTTTGGTTTTATATAAAATTTCTTTATATGAAACCATGTAAAAATGTTTTTTTAAATTTTCATTTCATGCAAAACTATAAATTAGATGTAAGTTAAGTATTGCAAATATTCTTTAATCAAGAAATGATATTAGGAGAGTTTCTTGTTTCTATGAAATCAAATATGAAGCAATTCATGAATGATCAACAATGCATAGATATGCATATATATAAATAACGTAAAAAAAACGATATCCAGAACGATTGGTAGACACGTAGAAAGTGGTGTAGCTTTACCAGGAGAAATGAAGACCGAATCACAGGCAGGCACCCCCCCCTGGTTTACCATAAGAATGGTCCCCATTATCCCGTAGATCC…
>TCONS_00047715 database_lncRNA_id:"100578075" GL630664.1 + 108-378_450-2285	TCONS_00047715	XLOC_015443	database_lncRNA_id:"100578075"	GL630664.1	+ 108-378_450-2285	AATTGATCGAGCAGTTTCAAACGTGTTACTAATTACCACTATTTACATGATAATTAAGCTCGCGCTAATAGAAGAGAAATACGATAATCGATCGTTCTACACTGTCAACCGTGATACCATGAGGAAATAAAATATTTCTTGGAACGAAATGAAACAAGTTTCGATTACGAGTATCACGTTCATAACGTTTGGAAAAAATATTTTGTTCGCATAAAAGGAAAAGAATCGAGACCTTTTAGAAACAGTTAAATTAATAATTCTATTTTCAAAGAAATGTAATATTCGACGAGGCTCAAATTTTCTTCCTCAGAATATCGTCTAATTGTTAAATATTCAATTGTTAGAAAAAGAAGAAAAAAAATATATACATCTTTTTGCATCAATTTTCTCTTCATCAAT…
>TCONS_00092043 database_lncRNA_id:"100578082" chrLG1 - 7579963-7581371_7581451-7581603_7582259-7583701	TCONS_00092043	XLOC_041515	database_lncRNA_id:"100578082"	chrLG1	- 7579963-7581371_7581451-7581603_7582259-7583701	TATCTACTTAATTATTTAACGAGTTATCATAACGATAATAACATGATAATGTATACTTCTACGTATATTCCTGAACATAACCAATGCTATCAAAAGCTCACGTTATTTTGCAAAGTTCTTTGTTATTAAATAAGAACTCGTAAATATTTAACGACACTATAAAAATCAATTGTGGCGCTCTCACACCTCTCGAATTCGCAAGTTGGATTATATCGTACATGCTCGTGAAACGTTGGCACGCATTGCAAGATTATTTTAATCATGGCGCCACAATGAGAGCGTCATTTCACAAGCATGATATTTCTTTTTTTAGTTTGTGTTTTTCTAATTTAAAATTTTCTTGAAAATTTATATAAACTTGACGGTTTTCACATCATATATAAAAAATAATATTATAAA…
>TCONS_00092045 database_lncRNA_id:"100578082" chrLG1 - 7579963-7580900_7581071-7581371_7581451-7581603_7582259-7583701	TCONS_00092045	XLOC_041515	database_lncRNA_id:"100578082"	chrLG1	- 7579963-7580900_7581071-7581371_7581451-7581603_7582259-7583701	TATCTACTTAATTATTTAACGAGTTATCATAACGATAATAACATGATAATGTATACTTCTACGTATATTCCTGAACATAACCAATGCTATCAAAAGCTCACGTTATTTTGCAAAGTTCTTTGTTATTAAATAAGAACTCGTAAATATTTAACGACACTATAAAAATCAATTGTGGCGCTCTCACACCTCTCGAATTCGCAAGTTGGATTATATCGTACATGCTCGTGAAACGTTGGCACGCATTGCAAGATTATTTTAATCATGGCGCCACAATGAGAGCGTCATTTCACAAGCATGATATTTCTTTTTTTAGTTTGTGTTTTTCTAATTTAAAATTTTCTTGAAAATTTATATAAACTTGACGGTTTTCACATCATATATAAAAAATAATATTATAAA…
>TCONS_00085174 database_lncRNA_id:"100578086" chrLG1 + 12824235-12825112_12825283-12825818_12825900-12826787	TCONS_00085174	XLOC_030566	database_lncRNA_id:"100578086"	chrLG1	+ 12824235-12825112_12825283-12825818_12825900-12826787	ATTTAAAACATGTAACTGATTATAATAATATCACATATTCTAGTACTTCCTTGAATAACGTAGTTGATTAAATATCAAATTATCTAGGGAATTTTATCGAACATTCTTTACATAACTATTCACCAAAGAATTCAACAGTCGGAGTTCGCCAACTATCGAGAATTTTAACGAAATTTTAACGATGTCTTTTCTAACGCAAAGGATTAGTTCAAAGTTGGATTATAAAACCTGGATCATAAATTAAAAAACAATTTGAAAATTCCAGTAGCCACGTACCGCGAGTCGCGCGTCACGATTTCATTAATTTAATTCTTCACTCTTTCTTCTTAGATAATTTCCATTCACAGGATCGTAATTTCATGGAAATAATCAAGCTTCTTCCACCAACGTCTCGATTCT…
>TCONS_00266389 database_lncRNA_id:"100578101" chrLG11 - 3040779-3041113_3041191-3042465	TCONS_00266389	XLOC_077691	database_lncRNA_id:"100578101"	chrLG11	- 3040779-3041113_3041191-3042465	ATGGGGAAACGTAAAACAATCTGGCTCGTTGCAAAAAATGTACATTACGTTTATTGATGGTAGCTCGCGAAGCTCCTCGTGAATATCGAGTGATTACAAAGAGGCGCTTGATTTAAAGGGTCGAGTAATTTACGAAGCAACACGTGATACGCTAGTACACGATCGTTCCGTAAGGACTCAAATCATGTCCTTTGTTGCATTTTTTTTCATTCCTTTTTTTTCTTTTTTTTTTTTTCTCTTTTTTTTTTTTTAACAAGGAAAAAAAAAGTCCGCTACGGACTATAGAAATCGCTATGACGTCTATATCGTTTTTTTCGATCTCTCGTTTTTTGTCCTCTTTTCATCATTATTATTTCATTCCTCCCTGGTCTCGAATCGAAGAGATAAGGAGGAATGAAA…
>TCONS_00949908 database_lncRNA_id:"100578103" chrLG9 + 3881923-3882422_3887208-3887300	TCONS_00949908	XLOC_247836	database_lncRNA_id:"100578103"	chrLG9	+ 3881923-3882422_3887208-3887300	AAAAAAGGAGCATACTCGAAAAATTGAATTTTATTTATCTCTTATTTTAAAGTCTCTCCTCGCTCGCCGATTCAAAAGGAATTCTCTTTATCGAAACCGATCTATTAATCCACCGGCTGAAACTTCCGATCGTATCCTCCTAGCCTTGGATAGTATTTACGTTATTTGTAATCTCCGCAATTTTCCACGAGCGTCCAGGGGATCCCCGTTTCATCTTATCAAAGAAAGCAGGAGGATCGGGTCGAGGACGGGGCCAAGCAAGCATGGAGGAAGCGAACGAACGAGAGAGAGAAAGAGAAAGGCAAAGCCTCATAAAGCCATCACACGTCAGACGGAGAGATCGTTTTTCCGATAATCGTGGCAAGGATCCGCGCGAGCATTCATCGACTCTTATTCACA…
>TCONS_00962475 database_lncRNA_id:"100578103" chrLG9 + 3876598-3878385_3887208-3887211	TCONS_00962475	XLOC_247836	database_lncRNA_id:"100578103"	chrLG9	+ 3876598-3878385_3887208-3887211	AACGTGCAATTTATTAGTTCAATATTTTCAGTGGACTACAAGTGTGCTTCGCGTATCTATTACGTATCGTATGAAATGTAATACAATTTTCACCAGTTCCATTCCAATTTTTTGAAACTTTTTGCCGTTTATTAATTTGTTCGTTTATCAACCCACTCGTATTTTTTTCAATTGTTCCGTCGAATCTCGATTCACTCGTTTAGATTTTCTGAATCGAGTACATCATATTAGGCGCGAATATTATTCGCGGAAATTTCTTCTCTCTTCTTCCCTTTTTTGCAATCATAATCTTTAATTAATATCCCTATACGATGTTACTACGGTGTTCTTTGAAGTTTATACAGTTTTTGCTCGTTATTAAGCCCTTCCATGGTTGTTAAACGCGGCCTGTAATCCATT…
>TCONS_00106508 database_lncRNA_id:"100578104" chrLG1 - 4527646-4528996_4529225-4529301_4529386-4530097_4530382-4530739_4532751-4533003_4533234-4533971	TCONS_00106508	XLOC_040252	database_lncRNA_id:"100578104"	chrLG1	- 4527646-4528996_4529225-4529301_4529386-4530097_4530382-4530739_4532751-4533003_4533234-4533971	TCCACATTGTCATCATCGATACCGTCACACTCGAAATGATCGCGTGGGATTGCGATTCGAATGAATCGCGAAAGAAAATCGCAATCGTCGCCGCTCTCACCGACGTTCTCCTAATAAGAGGGTGTTCGGGGGTGTAAGTCTAATATTATGTAATAGGGGCCACGTGGCAGCCGTTCGGTCCCCCGGAATCGAATTCGGTCAGAGTTCGGGTCTCCGCTGTGTCGATTGTCGTAGGAGAAAGGAAACGTAGCCGCCCGTATTCCGCATAGCTACGTTGGGTTTCATCCCTCTCGAGTCAACGTTCACAATGAACTGCACCCCGCGGCAGCGGCAGCCAGTATTCAGCCTTTAATCCGATTATTCCTTTCGAATCAACGAGCACCACGTTTCATTCCCGGA…
>TCONS_00119344 database_lncRNA_id:"100578104" chrLG1 - 4526234-4526732_4526836-4527198_4527819-4528975	TCONS_00119344	XLOC_040252	database_lncRNA_id:"100578104"	chrLG1	- 4526234-4526732_4526836-4527198_4527819-4528975	GTATACAATTGAAGTAGAAATGGATGTTTCCTATGGTGGAGTCTTCAACCATTGATCAACATATAAATAACTATAAGTAACTAGGATATAAATTAAGAAGAAATTAATGACAACATAGACATTTTTATGGAAAATATAGTAAGATATTATCGTGTAGGTAAAATAGTAGGACATAATTATCGTCATTAAGGAAAAATTTCGAATTGTATCGAAAGTGATATATGAATATCGAGATTTCAAGAAGTGCTTTGTGATGAATTGAACAAAGAAATGTCATTACATCGACATTGTAAATTGAAGATATTTGAAACTATTTATATACTCTTACTATATCTACAAGAAACAAGATAGGCGATTGTGTTAAGATACCTTTGTAGAATCTCTCCCCTTGTTTCGCGG…
>TCONS_00085169 database_lncRNA_id:"100578110" chrLG1 + 12818150-12818873_12819312-12820121	TCONS_00085169	XLOC_030562	database_lncRNA_id:"100578110"	chrLG1	+ 12818150-12818873_12819312-12820121	ATTTTTCTTCTATACTTGAGGAGTATATCATTAATTTTTTTTCTTTTTTACTTTGATCATTTGATATATCGTTTAATTGTCAATTCAATTAAATCGATTATTAAACGCAAATGAATGTGCAACGTGATACTTAGTTTATCCGTGTTTATTGCCAGGATAATATGTAGTTACTGAAAACTTGACTTCCTTTAGTAACTTAATAAATCTTCTGCTCACCTCTATGAAATACCTGTAATTACAGCTGTTTAAACCGAATAAGAATTAAGCATAATACTGGTGGATATATATTCACTGTATTCATTTAATTTAAAATTCATTCAAGTATCCGGAATTCAATCTTCTTGACCCGTAGTTTTTTTTCTTTTAGTCAACATTTGTACGCGTTTCTCCATTTAATTA…
>TCONS_00083176 database_lncRNA_id:"100578114" chrLG1 + 5755962-5757409_5757497-5758025	TCONS_00083176	XLOC_028041	database_lncRNA_id:"100578114"	chrLG1	+ 5755962-5757409_5757497-5758025	ATTTTGTTGGGATTAATTAAAAAACTGTATATATATATATATGGAGAAAGTACTTAAATATATGTAAGATGGTCGAGGATGGTGAACATTTATATCTACTTTGAGTTCCAACCGTGATTTACGATTCGTGATTGAAGATGTTTCTTCGCAAGATCGAGATGTTTGTCGGTTTTAATATTCATGGTGTTACGCAAATTTACAAACTGATTGGCAGAGAACGAAGATTCGATCCACGAATTTTCTTTTCTTTTGATCCATTCAAAAAACGCTAACGTGTAAAAATTTCTAGGTAAATTCTAGGCACATGATTGGTGATTTGAAAGCTGCATTTCTGAAAAAATTGAATAACGTTTAAAAAATTCGTGGAATAAATTGATCTTGTTGGCGAAGGTGATTCAT…
>TCONS_00778597 database_lncRNA_id:"100578117" chrLG6 + 8894906-8895178_8895247-8895482_8896276-8896431_8900232-8900442	TCONS_00778597	XLOC_203663	database_lncRNA_id:"100578117"	chrLG6	+ 8894906-8895178_8895247-8895482_8896276-8896431_8900232-8900442	TATCACGCAATTATTAATTTTAACAAATATATTAAGGAAATAAAATAAATTGTATTGGAAATTTTTTGTTAAATAGAAGGATTTATGATATATAGATTCTGATGTAGATTTGGGATTTGATAGCGACGTATTTAGTTCACACAAACACATTATTCTCTATTTTCCTTTGTATCAAACTTCTACGTTCTATATTTCCAGTTATATATAGTTGTCACGACAACTATTCACTTACTTTGCAACAACAGCTTACAGATAATTCGGAATAACTACTTTAGTAATTATTTGTCACGGAAAGTTTATATTTAAGATAAACATTAAACAAAATGGAAATTTTACAACACAGAAGAATCAAAATATGGTACATACATTTCCACGCACGCAAACTCATCTTGCAAACTC…
>TCONS_00786872 database_lncRNA_id:"100578117" chrLG6 + 8894869-8895482_8896276-8896431_8900244-8900330	TCONS_00786872	XLOC_203663	database_lncRNA_id:"100578117"	chrLG6	+ 8894869-8895482_8896276-8896431_8900244-8900330	ATTTTTTTGATTTATTAAAAAGATATAGAATTACAATTATCACGCAATTATTAATTTTAACAAATATATTAAGGAAATAAAATAAATTGTATTGGAAATTTTTTGTTAAATAGAAGGATTTATGATATATAGATTCTGATGTAGATTTGGGATTTGATAGCGACGTATTTAGTTCACACAAACACATTATTCTCTATTTTCCTTTGTATCAAACTTCTACGTTCTATATTTCCAGTTATATATAGTTGTCACGACAACTATTCACTTACTTTGCAACAACAGCTTACAGATAATTCGGAATAACTACTTTGTAAGTAAATTAAGCTCTTAGAAATACAGATACAAGAAAATTAATCTGATTTTACACATTTTCAACAGAGTAATTATTTGTCACGGAAA…
>TCONS_00091299 database_lncRNA_id:"100578131" chrLG1 - 4522854-4523216_4523615-4523830_4523920-4524006	TCONS_00091299	XLOC_040250	database_lncRNA_id:"100578131"	chrLG1	- 4522854-4523216_4523615-4523830_4523920-4524006	TATACACATATATATAACATGTATATTATATACATACGTATATAATAATTTTCCACATGGCACGATAGTTCTATTCACATATTATTATTCGATTTCCTTCAGAAGAAGGAGAAAAAGGAGAAGGGGAAGAAGAAGCAACGGTTGTCGGTGTAAATGTCTATCGATCGCTGATAATCTACGATCGAGACATCTGATGGCAGCAAGTTATGTAATGGGACGACAAGCAGGAAATAAAATCGACTTGTAATGTCATGACGCATCTTGCGGCAAAGCCAAAGTCACGCACAATACACGAAACGACAGATAATACTAATCTTAGAAGAAATCAGAATTGAAGAGATTGAAATGTACAACGTGCGAACGTGTGCGATATCTTTGAAGCTGGATTTCTCAGTGCTA…
>TCONS_00022077 database_lncRNA_id:"100578134" GL630407.1 - 96696-98245_98581-98683_99361-99561_100383-100487_100821-100990_101491-101536	TCONS_00022077	XLOC_007470	database_lncRNA_id:"100578134"	GL630407.1	- 96696-98245_98581-98683_99361-99561_100383-100487_100821-100990_101491-101536	CGCCTGTTTACCATCGAAATTCATGGACACGGGACGTGTATTACTGGAAATTGGAGATTCGTATTCGTGAATGCTTGGCTTTTGTTAATTACCTATCGAACATCGCCCCCTTCTCTTCCCCCATCGCCATTACTAATTTCGGTAATCGAAATTATATCGCAGTCCGCCATTTTGTCGTTGAAAATCGCAACAATTAGAAGCTTCTTTTCGCAACAGGCAGTTGTCGAGAAACCTCAAGACGGGAGAAAATGTATTTTAATATGGATACCACAGTAACGGTTTGATATAATTTCTCATCAATAGTTCTTTTACGGAGAAATGATATTTCTCAAAGCACGACATTCCATAGATCACGACAATTGATGGCAACGCAGATTCTTCGCATCTAATGATGAGTCG…
>TCONS_00768741 database_lncRNA_id:"100578153" chrLG6 + 8891959-8892746_8892828-8893777_8893870-8893955_8894143-8894507	TCONS_00768741	XLOC_203663	database_lncRNA_id:"100578153"	chrLG6	+ 8891959-8892746_8892828-8893777_8893870-8893955_8894143-8894507	CGCAGTTTATATAAAATTAAGCATTTCATATGCAGCAACCTAACCTAAAAATCAACTTTTAACAAAAATTAATTCCATTCGCATTAAATTAAATACATAAAACGAAAAGGAAGAAAAGAAAAAGAATAAATTTTCGGAATAAATTGATAGAGGAAAAAGGAAGAGGAGGAATAGAATGGCGAAAAACGAGGACATGAATGGGAAAGAAAATTCCCGTTGGAACGTTGAAGATTCTCTTCAGTCTATTTCCATTCGAACGTAGGCGTTTTCGTTTCCCTTCCCTTCGTTGTAAACGGATCCTGGGATCGATGAATGACACCGGCGTAAAAAGGATTTACCGCGTTCCGCGACGAATCGACGGTGATCCGATTCGCATTAAGCCCGCGACGTGCACGCCGG…
>TCONS_00817156 database_lncRNA_id:"100578153" chrLG6 + 8891959-8892914_8893012-8893777_8893870-8893955_8894143-8894549	TCONS_00817156	XLOC_203663	database_lncRNA_id:"100578153"	chrLG6	+ 8891959-8892914_8893012-8893777_8893870-8893955_8894143-8894549	CGCAGTTTATATAAAATTAAGCATTTCATATGCAGCAACCTAACCTAAAAATCAACTTTTAACAAAAATTAATTCCATTCGCATTAAATTAAATACATAAAACGAAAAGGAAGAAAAGAAAAAGAATAAATTTTCGGAATAAATTGATAGAGGAAAAAGGAAGAGGAGGAATAGAATGGCGAAAAACGAGGACATGAATGGGAAAGAAAATTCCCGTTGGAACGTTGAAGATTCTCTTCAGTCTATTTCCATTCGAACGTAGGCGTTTTCGTTTCCCTTCCCTTCGTTGTAAACGGATCCTGGGATCGATGAATGACACCGGCGTAAAAAGGATTTACCGCGTTCCGCGACGAATCGACGGTGATCCGATTCGCATTAAGCCCGCGACGTGCACGCCGG…
>TCONS_00264477 database_lncRNA_id:"100578154" chrLG11 + 11538285-11538662_11538754-11540301	TCONS_00264477	XLOC_075127	database_lncRNA_id:"100578154"	chrLG11	+ 11538285-11538662_11538754-11540301	CAATCCTTTCCTCTTTTTTAACAATCAAGACGCACGATAGTTTCGATACAGAGTAGTTTTTTACGAAAAGTGTTTCAACGACGGAGTGTTTTGAGCATTTAGATGTTTATCGAGGTGTGCGAAAATTGATCGTATCGCGGGGATACGTCGAAGCTTAACGCCGTTTGAGGTTATAACAGATACACGGGCTGTGACGTTGAGTGTGTTGATCGAATTTAACACGGGTATTAATTCATACGTGAAATTTAATACATAGCTCTAGTTCTTTTTATCGGTATATATGGTGATAAAATTTGAAATTAATGTAACGTGAAAAAAGAAAGTGTACATCGAGAGATTAAACTTGTTCGTTGAAACTCGTCGAATTTCGATCGAAAGGATCGGAGGGAAAGAGGAGAC…
>TCONS_00829498 database_lncRNA_id:"100578160" chrLG6 + 15447789-15448249_15448500-15449998_15450062-15450348	TCONS_00829498	XLOC_207474	database_lncRNA_id:"100578160"	chrLG6	+ 15447789-15448249_15448500-15449998_15450062-15450348	CGCAACACAGGCTATGTTCGCGTCATCGGCGCAGTTATCCACCGCTTCACTCTCCCTATGCCCTTCCATTTGACGCGGCACTACTTGCCGGTGACCTACACTTCATTCCTTTCCCAATTTCTTCGTGAAATTACCGAAATACATACCAAATACCAGGCATACGTATCGAAGGAAGGTAGGAATCCTTCACCCTCGAGCATTAATCGTAACATTTATCGACATTTCATATCCTTTTTTCGTACGTCATAGGTATAAGTTTATTTTTTACTTATATTCTTGTTTCTCACGAAAACTACGACTACGATACCGCATTTTTTTTTCTCAATTTCCTCGAGAAAGCAGCAAATTGCTGAAATATATCTGGAATATATCTGTGTGTGGTAACACAGAAATCGTCCT…
>TCONS_00015100 database_lncRNA_id:"100578172" GL630384.1 + 8241-8700_16499-16664_16745-16885_17016-17462	TCONS_00015100	XLOC_005159	database_lncRNA_id:"100578172"	GL630384.1	+ 8241-8700_16499-16664_16745-16885_17016-17462	TGATACAAATGTATAGTAGTATAAAATATATATAAGTATAAAACTTATTCCGTTAAATCGATTTTTTAAAAAGTTCTAGATACTTGTATCATAACAATCATGCTATGTCAATACTTTTGTCTAGTATTGATTTGTAACAAATGTTAATGAATGTAAACAAACATTATCAGTTATATATCTACATATGTTAATATTGTTGTGTCCTTAAATATGACTTGTGGGATTTTCAGAGGAAGGCCAAAGTTCGGGAGTGATTCAGCGCGAATAGATTTTGAAATGAAATTTTGAGTTTTATTGAAAATTTTCTTTACAAATGCGAATTATTTTTTGTTAAACTTTAATTGTGATTCCAAAAATACGTGTTTATTTTTCTTTTGATCGAATGTGTTTCTAATGTTG…
>TCONS_00015102 database_lncRNA_id:"100578172" GL630384.1 + 16217-16664_16751-16885_17016-17357	TCONS_00015102	XLOC_005159	database_lncRNA_id:"100578172"	GL630384.1	+ 16217-16664_16751-16885_17016-17357	AATTTTCAATCATATGTAGAGCTTATTTATTTAACATCCTCAATTATTGCTTATTATTAGTTATTATCGTTATTTGTCATTTACAATCACTGATAAAACATAATCTCTCTTTCTTAATTTTCAAACTTTTAATCTTCAAACTTATTTTATCTTATTATTTATTTAACATTTATATATAATTTTGGTCATTCAACAATATGAATAATTGCTGTTGTTTTTGATATAAATTGCAGAATACGCATATTTTGAAACATTATCTTGATACATGTGTTTTTCTTCCAGAGTTGAAACAGTTATTGCGAGTCTATATTTTGTTGAACCTTATTCTATTATCCCAATTATTGGTTTTATGTTTGCAATTGGTGTGACGATCAAGAGGCGAATTTATTCATCTCTTAT…
>TCONS_00015403 database_lncRNA_id:"100578172" GL630384.1 + 16276-16664_16751-16885_17016-17191_26528-27426	TCONS_00015403	XLOC_005159	database_lncRNA_id:"100578172"	GL630384.1	+ 16276-16664_16751-16885_17016-17191_26528-27426	GTTATTATCGTTATTTGTCATTTACAATCACTGATAAAACATAATCTCTCTTTCTTAATTTTCAAACTTTTAATCTTCAAACTTATTTTATCTTATTATTTATTTAACATTTATATATAATTTTGGTCATTCAACAATATGAATAATTGCTGTTGTTTTTGATATAAATTGCAGAATACGCATATTTTGAAACATTATCTTGATACATGTGTTTTTCTTCCAGAGTTGAAACAGTTATTGCGAGTCTATATTTTGTTGAACCTTATTCTATTATCCCAATTATTGGTTTTATGTTTGCAATTGGTGTGACGATCAAGAGGCGAATTTATTCATCTCTTATTTTGTTTACATCATGAAGAGATAAAAACAATTCGTTAATTAAACATCTGGAAGAAGAGA…
>TCONS_00015498 database_lncRNA_id:"100578172" GL630384.1 + 6004-6027_6119-6344_16499-16664_16745-16885_17016-17350	TCONS_00015498	XLOC_005159	database_lncRNA_id:"100578172"	GL630384.1	+ 6004-6027_6119-6344_16499-16664_16745-16885_17016-17350	CTTAGGAAGAATATTTTTTATAATCATATTGGTTAAGATAAATACAATTAATGTCTATATCATACAGACTATATGATTTATATGGAATTGATAAGAAATTTTTTGAATTGACTGTTTCAAAAACAAAGGCAATAATTAGGCTATTAGTAGGCAAATACTATGGAATATTTCTTCAGTAATTCTAATGAAATAATAATTATCCTGGTATTATAGGTATTCATTATTGAGTATAAAATTTGTCAAATTTAAGAGTTGAAACAGTTATTGCGAGTCTATATTTTGTTGAACCTTATTCTATTATCCCAATTATTGGTTTTATGTTTGCAATTGGTGTGACGATCAAGAGGCGAATTTATTCATCTCTTATTTTGTTTACATCATGAAGAGATAAAAACAATT…
>TCONS_00045755 database_lncRNA_id:"100578173" GL630640.1 + 1141-1381_2214-2424_2509-2576_2761-2767	TCONS_00045755	XLOC_015014	database_lncRNA_id:"100578173"	GL630640.1	+ 1141-1381_2214-2424_2509-2576_2761-2767	TGTGTCTATACGTACATGTATTTAGTATGCATTGTATCCTTTTATAAAGATAAAAATTAAAGAAAGATAAAGATTTTTGATAATATAAATAATTTATATTTTTATGAAAATCTGTCATATATATCGTTTGGTAATATTAGTACTGTTTGTTCGATAAATAAATTCGTGATATCATATATTAGAACTAAATATATATCAAAATTATGACAATTAAAATAATTAAAAGTAATATTGTTAACAGGTGGAAATGGACAATGCATAAATATTCGACAATTATAATGGAAATTATAATGGTCTAATCTCGTAGTTTATGTTCTAAAAACTATAAATACTGTGATGGAATATTTAAAGAACTTGGTGAAAAAAGAAAATTCATGAACCGAAGCACATGTAAACTTA…
>TCONS_00085146 database_lncRNA_id:"100578184" chrLG1 + 12793689-12794239_12795201-12795803	TCONS_00085146	XLOC_030547	database_lncRNA_id:"100578184"	chrLG1	+ 12793689-12794239_12795201-12795803	AAAAAGTTAAATGCATACTTACATTATATTTATTTTGTTCTAGAAAGATAATAAAAATCTTCAATACGACTATAAATTTAAATAATATTTCATTATTGAAATAAAAATCAATTTTGAAGTATCATGTGTCATCTAAAAACAGGATATTTCTTGAGGAGATTCTTGAAAATTCTATCTCATTTGTGACTAATTCACATATAAAGCACTCGGCAAAATTTCGTCCATTTCTCGAAAATCCTGTCCACGTTTCGACGAGTTCCGGCAAATAGTCCCCGAAATTTCATCTTGCCTCGACCAAGTTCCATGTGTACGTCCCTATGTACAGAGATTGTCACAACAATCGGAAGAAAGAGGCCGGTAGCAGGTGGTTCACCCTCGGTTTTATGAGCGGTCGCCAAA…
>TCONS_00188314 database_lncRNA_id:"100578187" chrLG1 + 1664514-1665765_1665860-1666441_1667029-1668035_1668145-1668794_1668876-1669444	TCONS_00188314	XLOC_026155	database_lncRNA_id:"100578187"	chrLG1	+ 1664514-1665765_1665860-1666441_1667029-1668035_1668145-1668794_1668876-1669444	GAAATCATGTCAAATTGTCCAAAAGTTTGTATCGTATTAAATCGTATATTACGAGTTCTCACCCGAATCCACCCGACTTTTTCCGACACGGCCCGAACGATCGAATGTACTCAATATATTAGTCTGCTCGCACGTCCTTAATTGCTAGTCATTGTTCGGCAGTAAAACCGTGTTAACCTCTTGATGCATGTGACACACATATATATAAAACTTTTTAAATAGAAATTGAATATTTTACAAAAAAATTTTAGCGCAAAAAGATTTCAACTTATATGAAGAAAAGGATCATGACTTATTTGAATAACAAAACAAAAGAGAGTTACAATTCAAAAATTATAAAACATTATATCATTTTTCTTAACATAGAATAGTCTTGCGCAAAAGACATATTTTTCAGTT…
>TCONS_00196969 database_lncRNA_id:"100578187" chrLG1 + 1664479-1665765_1665860-1666441_1667029-1667825_1667938-1668031_1668145-1668794_1668876-1669434	TCONS_00196969	XLOC_026155	database_lncRNA_id:"100578187"	chrLG1	+ 1664479-1665765_1665860-1666441_1667029-1667825_1667938-1668031_1668145-1668794_1668876-1669434	ATTTACTGGTTTTCTTTATAAAATAATAATTACGAGAAATCATGTCAAATTGTCCAAAAGTTTGTATCGTATTAAATCGTATATTACGAGTTCTCACCCGAATCCACCCGACTTTTTCCGACACGGCCCGAACGATCGAATGTACTCAATATATTAGTCTGCTCGCACGTCCTTAATTGCTAGTCATTGTTCGGCAGTAAAACCGTGTTAACCTCTTGATGCATGTGACACACATATATATAAAACTTTTTAAATAGAAATTGAATATTTTACAAAAAAATTTTAGCGCAAAAAGATTTCAACTTATATGAAGAAAAGGATCATGACTTATTTGAATAACAAAACAAAAGAGAGTTACAATTCAAAAATTATAAAACATTATATCATTTTTCTTAACAT…
>TCONS_00027716 database_lncRNA_id:"100578194" GL630438.1 - 69063-70355_70479-70788_70854-71407	TCONS_00027716	XLOC_009362	database_lncRNA_id:"100578194"	GL630438.1	- 69063-70355_70479-70788_70854-71407	GAAAGATCACAGTTCCTATTTCTTTTTTTGTTAATATAGTTTTGATTAATTGATAAGAAGAATTTCGATCTAATTCACTTATAGAATTACGGTATATTTTCTTTTATTTAGTGAACAATTCCCAAGAGTATGCTATATCATATTCCATGAAACAACAACAACAAACAAAAGTCAAAACAACTGTGTTCGAAATATTTGCATCATTCAGAAGAACATATTATGGCCTCAGTCTATCTATTTATATAGAATTAGAAAGATTGCAATCTTTGTAATTTATAATTTTCTCTAACTTGCTGACGACGAATTTAGCATCTCATATTTTGGATTGTAAGGTAATCGTTGGTAAGTTCTGGCAGAAATATTTTCGCAGATATACATATAAGTAAACATAATCTTCCA…
>TCONS_00604747 database_lncRNA_id:"100578214" chrLG3 + 12289728-12290129_12297342-12298564	TCONS_00604747	XLOC_161501	database_lncRNA_id:"100578214"	chrLG3	+ 12289728-12290129_12297342-12298564	GTCCCATATACTTTATATATATAGATATGTGTATAAAGGTGTATCGGTTATTGACAATTCCTTGGCTATAACTTGGCCGTAGGATACGCGGCGGTATCAATCGTGGCATAAACCTGAGCTTACCCAACGCTACCGCCTTGTCTCTGAACCACCACGAGCAAATTCCAGATTAGCCCGCGCCTCGGATAACATTTACATATAGCATACATTTGCAGTTGGAAAGCAGCGGCCGCCGGGGATCGCTGTCGTAGCTGGGCCCGCAAAGATTACGCATCACGGCCGGGTAGGACGCCATATTTTCTCCTTCCTTTTTACCCGGTTAACCGTGTTGCGCACATTAATAGGGAAAAAGTTAAAATTCCCTATCGATGGACGGGGATGAAATTTCCATCCCGCGCA…
>TCONS_00615725 database_lncRNA_id:"100578214" chrLG3 + 12290107-12290129_12297342-12297462_12301000-12302361	TCONS_00615725	XLOC_161501	database_lncRNA_id:"100578214"	chrLG3	+ 12290107-12290129_12297342-12297462_12301000-12302361	TGAAATTTCCATCCCGCGCAAAGGAGAAAGGAATTTTTGAAGAAGGAACGATAAAAAGAATTCTTTCGACGTGATTTGCGCGCTTCCGGGAGAGGGATGGATGTTTCCTCGCGGAAATGACGGAAAACGTGGCGGAAAGGAAAGATTTCCACAATCCACAACCTTTTTAAAACCTCAAATATAAATACTCTCTAAAATACATCCAACGGCACAGTTCACTTAGTGGAAAAAAGTCTCGCGGGACAAGTACAGAGACAAGAAGAGCCTATCTCCACTTCAGACTCTTTGTCGACATCACACGCTACACAGCAGCACGAAAACTATAATTCGAATACTTAAAATCGGTAAAAATTTCATTTAACGAGTCTAGTTTATTCATATATATATACAATTATTATC…
>TCONS_00627857 database_lncRNA_id:"100578214" chrLG3 + 12286574-12287239_12287472-12287541_12289943-12290129_12301000-12302323	TCONS_00627857	XLOC_161501	database_lncRNA_id:"100578214"	chrLG3	+ 12286574-12287239_12287472-12287541_12289943-12290129_12301000-12302323	ATTCCTTCCACTTTTTTCTTACGATCGTAACTTCAGACCGGATTAGAATTATTTTACTTTGCGATCGTGACGCCATCTGAAACAGCGTTCTTTTGTTTTTAAGAACAGCCGCGACGAGCGCTGTTTCCAGTCCCGTGCGAGAAGCTTAGCGAATCGAGTGTCGAAGCTGTCGAAATTGTTTGCGTGCGTTACTGAGAAAGTATAACTGGTTTACGTAATAAAATCTTGAATTCGGAAGAAAAAAAGGGGAGAAAGAATTATTATTTGCTCATCTAAATGTATTTTATAATCGTGAAAGATACAGTCGGATCGCAGTGCTCGCGGTTAAGCGCGATAGGACGGGATACTTGTTGTACCGTAATCCACCAAACGTTGGAATTCTGAACGTCGAAACGTTGT…
>TCONS_00297890 database_lncRNA_id:"100578225" chrLG11 + 1170911-1171507_1171706-1171774	TCONS_00297890	XLOC_070564	database_lncRNA_id:"100578225"	chrLG11	+ 1170911-1171507_1171706-1171774	TATTTGTTTTTATTTGTAGAAATTAAATTTATTTTGAAGAGGGAATGATAGAAAAGATGATTTAGAAATCTAATTAAAATTGCTGAAAATTTTCATCATTTTTAACTGGAATCCCATTTTTTTTAACTAAATCATATTATATTCAAGAGAAATTCAATTTATTAAACAAATACTCTACGTTACGTGTTGTTTGAAATATTAAATAATTGTAAATTTTAAAATAAACAAAAAAAGAGTGAATCTACTTACAGTATCATTAACTGCGATGATTTGATAAAAATTTGATAAAGTAGAGATTAGAGGAGCAAACTTGTCAAAGTAGGTTATGTTTAAAGACGTATTTAATATAAGAGGTTAGCTTTTGCGTAATGATGATCTAAACATCGAAGGAGGCAAAGT…
>TCONS_00855097 database_lncRNA_id:"100578241" chrLG7 + 13167597-13167970_13168037-13168616	TCONS_00855097	XLOC_225802	database_lncRNA_id:"100578241"	chrLG7	+ 13167597-13167970_13168037-13168616	CACACGCTGATCACAGTACAACTAACCGTCTTTTCCCAACATTTTCGCCTTTTATGCATTTGTTGGTGTCAAGACTGAACCAATCAGCGTAAGCCATTCGACATCTTCCATCTGATTGGTCCGTTTCAGCTACCAAAATTGCTCGATATCCGAGAAACAAGACCGCAATAAAAAAATTTGCTGACGAACCAAGCAGATGTTAAATCGCTAACCGTCACTTTTTCATTCTATCGTTTGAAAATATTATTTCCAGCTACATTCTCGTTATTCAAATTTATCATAATTTTCAGAAGATGGATTTTTCGCACAATCATCTGCAACAAAAATACGTGTAGCACAAGAATACGATATAACACTCTATTAATTATCAACAGTGTCGGAAAGTTGAGTACGACGATG…
>TCONS_00605392 database_lncRNA_id:"100578261" chrLG3 - 2145330-2145335_2145634-2145916_2147087-2147413_2148195-2148376_2148621-2148733_2148909-2149479	TCONS_00605392	XLOC_162694	database_lncRNA_id:"100578261"	chrLG3	- 2145330-2145335_2145634-2145916_2147087-2147413_2148195-2148376_2148621-2148733_2148909-2149479	AATTCAAATTTTCTTTAAAATTATAGTCGAAGAAAGCACTCGTCAGTTGCGAAGAAGGTGCGCAAGGTGGCCGAGGAATCTGTGAGACTTAACGGTCGGACACGCCACGGAAGAACAAGTGCAGGGTGCACTTGTGGGAAGAAGGTCAGGGGTGTTCCCAAGTTACGTGGCGTGGAGGGTGCCTTGGCCACGAAGGTGGCGGCTCCTTCTTCGTGGTCGTCGAATTAATAGGCCATCTGCTTCTGCCTCCTTCGAGGAAGTCAATGTTTAGGAAGTCCATGGGAAGCGGCGACAACGGAAAGCCCCATAAACGATCGGAGACATGGGAACGAACGTTTGCAAGGAAGTCGCATGCGGCCCTGTTACGCACGATATATTCCTTCGCCTTCTGCTAATCAG…
>TCONS_00631610 database_lncRNA_id:"100578261" chrLG3 - 2146075-2146606_2147087-2147413_2148088-2148376_2148621-2148733_2148909-2149516	TCONS_00631610	XLOC_162694	database_lncRNA_id:"100578261"	chrLG3	- 2146075-2146606_2147087-2147413_2148088-2148376_2148621-2148733_2148909-2149516	CAAAAATATAGTAAATGAAATATACTTCTATCATAATAATTCAAATTTTCTTTAAAATTATAGTCGAAGAAAGCACTCGTCAGTTGCGAAGAAGGTGCGCAAGGTGGCCGAGGAATCTGTGAGACTTAACGGTCGGACACGCCACGGAAGAACAAGTGCAGGGTGCACTTGTGGGAAGAAGGTCAGGGGTGTTCCCAAGTTACGTGGCGTGGAGGGTGCCTTGGCCACGAAGGTGGCGGCTCCTTCTTCGTGGTCGTCGAATTAATAGGCCATCTGCTTCTGCCTCCTTCGAGGAAGTCAATGTTTAGGAAGTCCATGGGAAGCGGCGACAACGGAAAGCCCCATAAACGATCGGAGACATGGGAACGAACGTTTGCAAGGAAGTCGCATGCGGCCCTG…
>TCONS_00613867 database_lncRNA_id:"100578283" chrLG3 + 2152212-2152249_2153129-2153833_2154145-2154622_2154784-2154902	TCONS_00613867	XLOC_157046	database_lncRNA_id:"100578283"	chrLG3	+ 2152212-2152249_2153129-2153833_2154145-2154622_2154784-2154902	GATTAAATTGATGCCGTTAATGATGGGATTGAGTATACATATGTTTCGAAACATGGCGTTAATCCTCAAGATTCAAGTCAATAGATTAATTGATGGATGGTTCTTCTCATTGTTCAACAATGCTAATCCTTTGAAAAATTTGAATCGTGCATGGATCCACGAATGATTTTCACTCGATAAGTGACGAGAAAGGTAAAGGAAATATGCTTGATCTTTTTTTTTCAACGGTTGATGGTTGCGCAACACGGCGGACAACGGGTTATAAAGTTGTATACCCTTTAGGCACCTCAGTGTGTAACATTGTGAAAAAAACGAATGGCACCTGTGAGGTTCTTTGTCAGAATTTCTTCATCGGCAGGCAGCAGGTGAACTTGTGTCGGACAATGAGCCGCGTTGCTC…
>TCONS_00091777 database_lncRNA_id:"100578285" chrLG1 - 6580297-6580927_6582465-6583327	TCONS_00091777	XLOC_041058	database_lncRNA_id:"100578285"	chrLG1	- 6580297-6580927_6582465-6583327	CTTAAAAGTAATTTTTCAGTAGATTTATTCTCAGATATATTTATACTCTTAAAAAATTTAAAAAATAAAAATTTAATATATCCCGAAATTTAGTATTTTATGTATCTATGTATCTATATTTCATTATTAGATAAATCAAAAGATTTTGTTCTATATATTACGTACACAATAACCTTTTCGGTACGATTGTCGACTTTAGTCGATAAACACCGAATATACACGACCGATCGTTTCAGTACGCAGTATACTGTGGCAAGCGTCGTGTCGCGTCGTGTCGCGTCGTATCGTATCGAAGAGGTTATGGTTAATTAACCAATTTGAAATCGCGACAAATAATTTTTAATTATTCAACACAATAAAATATTAATTGCAAAAAAAGTACACTTTATTAGAAGAAAC…
>TCONS_00193186 database_lncRNA_id:"100578285" chrLG1 - 6582438-6582767_6582905-6583238	TCONS_00193186	XLOC_041058	database_lncRNA_id:"100578285"	chrLG1	- 6582438-6582767_6582905-6583238	TTAGTATTTTATGTATCTATGTATCTATATTTCATTATTAGATAAATCAAAAGATTTTGTTCTATATATTACGTACACAATAACCTTTTCGGTACGATTGTCGACTTTAGTCGATAAACACCGAATATACACGACCGATCGTTTCAGTACGCAGTATACTGTGGCAAGCGTCGTGTCGCGTCGTGTCGCGTCGTATCGTATCGAAGAGGTTATGGTTAATTAACCAATTTGAAATCGCGACAAATAATTTTTAATTATTCAACACAATAAAATATTAATTGCAAAAAAAGTACACTTTATTAGAAGAAACAAATTTTTCATTAAAAGCATAAAGGATGTTCATATTGTCGCCAATTTCTAAAATAAATATATATGTATCGCGATCCAGAGGAATGGTCG…
>TCONS_00119641 database_lncRNA_id:"100578313" chrLG1 - 6796064-6799786_6799895-6800596_6802080-6802214	TCONS_00119641	XLOC_041127	database_lncRNA_id:"100578313"	chrLG1	- 6796064-6799786_6799895-6800596_6802080-6802214	ATAAGTAAACACATTGTTTGCTTCTTCTTCTATGTGAAATTTACCCTTTGTCTGGTATAAACTATTTTTGTGAAGCAAATAAGCATGTGTATGTAACGAGGGTACGAAGGAGAATCCCGATAAATTGCAAGAAAAGTGTATACATTTTCAATGAAAAATCGTTTCCATAATCCTTGAATCGATGATACTCCTTCGACTGGTTTCTCCGTATATCCGTGAAAGAAGTTCTTCGATTTTACGAGTTCACAGAAAAAAAAGGAAAAGAAAAAACGTTCTCATTCCCAAACAACAATCGTAGCAGCGCAGACACGTGACAATAACTCGGGCGAAAATTCTCAGAGCATCTGGAAACGTCGTTATTCCCCGATTCCCTGCCATTGTGTCGCATTCGATCTGTCA…
>TCONS_00318936 database_lncRNA_id:"100578317" chrLG11 - 11562287-11562745_11562899-11562989_11563162-11565804_11565890-11565925_11566392-11566599_11566743-11566910_11567171-11567280_11567373-11569555_11569646-11570169_11570248-11570306_11570601-11571268_11571352-11571615_11571688-11571955_11572061-11572677_11572864-11573473	TCONS_00318936	XLOC_081294	database_lncRNA_id:"100578317"	chrLG11	- 11562287-11562745_11562899-11562989_11563162-11565804_11565890-11565925_11566392-11566599_11566743-11566910_11567171-11567280_11567373-11569555_11569646-11570169_11570248-11570306_11570601-11571268_11571352-11571615_11571688-11571955_11572061-11572677_11572864-11573473	GTTTTCTGGAATTTTACACGACACTCGAGCATCCACCGCGTTTTCATTCTAATCTTATGGATTTTTCTGCAAAGAACGCGCTAATTAACGAATGGCCGACGGTGTCGCCACCAAAGAATGCTGTGGGAATGAAACAGGGTGGCCAACATAGGATCGTAAATGAGATCAGAAAAATCAGGTATACCAAGATATTTGTCGACGTTTTGACGATAGTTTGTTATTCGAAAGTAACAAAGTTCTGAGGTTCCCATTTCGAGCGCATCGTATGCAAAGAGGTACAAAGTGTGAATAATGAAAAGTATTTTCCAAAGCGACGTGTGTGTTCCCGTGAGCGTGCGGATTGTTTCGTATTTCTCGTCACGAGTCTGACCGCGGGAAGAGACAAAAGAAAAATGAAAA…
>TCONS_00301709 database_lncRNA_id:"100578335" chrLG11 + 790941-791263_791359-791835_793336-793537_794000-794407	TCONS_00301709	XLOC_070397	database_lncRNA_id:"100578335"	chrLG11	+ 790941-791263_791359-791835_793336-793537_794000-794407	ATTCGCTTGCCCACGAGGGCTGACGTTCGTGTCATATTTCCCCATCGCTGTCTCCCACTCGTCCTGTTGGTCCAGACACACCGTCGTCCAGTACTTCCGTCACCTTGTGCGATGCACTCGATCTTAGAAAAAAGGTTCTTTTCTTTGTGGTTAGGAGAATGAATTGTTAACCACCGGACAATTCTTGTTTTGACGAATGATATATTAGGAATTAGGTTATGTCACGAGTAAGGAGATGTTATGTTGTGAATGATTGTGAATCGAGGATTTTCGTAAAAGAAGACGAGAATGATATCGGAAGGAATTGATATACATCGACATGAGATATGGCGATATGATTCGATCAGAGTTTGAAATTTTTTTTTATATAAAAAGTATACATAAAAATAATGTGTAATA…
>TCONS_00606368 database_lncRNA_id:"100578342" chrLG3 - 6353417-6354191_6421194-6421861	TCONS_00606368	XLOC_164070	database_lncRNA_id:"100578342"	chrLG3	- 6353417-6354191_6421194-6421861	TTATCAATACGTCATATAGAATAATAATTGAAAATGATAATTAAGCGAATTTTATTTATTTATGGTGTTGATATTGTCATTACTAAAAATACAGACTAGTTCTGCCATCTTACGTAATAATTTTTAACGAATCGAGTATCAGCCGTCGAGCAGGGATGCCAACGAGACGCGCGCATCTACGGCAGATCGTACGCGGAGTCGCGTCGTAAACAAGTTCGTTGCATCGGTAGTCGTATTTCCAAAGTTTCTTTGCGAATCAATCATTTACTTGTGCATTTTTCGCGATATCTCAAGACGAATCGTTTGTCGTGACGTAGTGTGTGGACGTTCGAAACCGAAGAACACCGTAAACGTAACTTTTTCCGAACGTTTCCACGATAGTGTGAGTGTGCGGGTTGG…
>TCONS_00263583 database_lncRNA_id:"100578343" chrLG11 + 7999035-7999445_8000423-8000666	TCONS_00263583	XLOC_073560	database_lncRNA_id:"100578343"	chrLG11	+ 7999035-7999445_8000423-8000666	CTCGAAATAAAGCCGACAACTCGCTCAGGAAACTAAAGCATATCTATTAATAATAAACTGTTTTCAGTGAACTGTCTTCCTGTCGTCTGGAGAGAGGTACGATTGCTCTTTGCGAATGCGACACGCCGGCTTTTGCATGGTATCGCCCATTCGAAAGCGTTGTCCGGCCTGGCGTCCGTTTCGTTTGCGTTATTATGTAATGTTACGTGCGAATAGCGTGTATATGGCACGCCGGTAAAAGGCTGTTGCACTATTAAAGAAAATTGCCCTCTCGCGGTGGTGAATAGGAAGCGTCATGCATTCTTCGATACGGTCATCGATCTGCTATTCGATCTAAGAACGTAAACTCTGCTATGTATAGTACTTTAGAAGTTTTTTTAATAATAAAAGAATAATATA…
>TCONS_00286278 database_lncRNA_id:"100578343" chrLG11 + 7998774-7999004_7999102-7999130_8000431-8000431	TCONS_00286278	XLOC_073560	database_lncRNA_id:"100578343"	chrLG11	+ 7998774-7999004_7999102-7999130_8000431-8000431	CTACGGTTTGCCGTGCCATCCTCAACCGCGTAGCGTGGCTAGTTGTTTCTTTTCTTTATTCCTTTGTCGGAAAGTCGGTGGCGAGTCTCGTTTTTAAGAGAAGAGTAGAGGGGAGGAGGCAAAAGGAAAACGACAACCGCTCAGCAGGGGCTGAGGAAGGAATGGTCGGGCTGGGGCTACAGAGAGGGGTACAGGGAGGGAGGAAGGGCCACGCAGCAAGGAGAATAAAACTGAACTGTCTTCCTGTCGTCTGGAGAGAGG
>TCONS_00976665 database_lncRNA_id:"100578354" chrLG9 + 7527692-7527779_7543387-7543602_7544627-7544991_7545093-7554026	TCONS_00976665	XLOC_249679	database_lncRNA_id:"100578354"	chrLG9	+ 7527692-7527779_7543387-7543602_7544627-7544991_7545093-7554026	CGACCTCTAATGTAAAGGCATTATTCCGTGTTGGACTTTCGACGCAGATACATCGGAGCGCGACGCAATACGATACGAAATTAATAAGAAGAAGAAGAAGGAAAAGGAGGAGGAGAAGGAGAAGAAGAAAAGTACTCACCGTCTGGCACCGCGTGGCTGGTCATCAAGAAATTAACGCAGGCTGCCCCTGTACCGTGTCCAATCAACGTCACGTTCCTAGGATCGCCGCCGAAGTTGCCGATGTTCTCCTGCACCCAATGGAGCGCCGCGATTTGATCCATCAGACCGTAATTCGCTGGCGAGCAGTTTGCGTATCGGGGAGGGGGAGGATGGGAGAGAGGAGGCCCGGTTGGAATAAAGGGAGAAGTTTCGAAATGGGATGGAGAGACGGAGTGGAAC…
>TCONS_00307420 database_lncRNA_id:"100578357" chrLG11 + 11573367-11573655_11573787-11573840_11574235-11574450_11574543-11574607	TCONS_00307420	XLOC_075141	database_lncRNA_id:"100578357"	chrLG11	+ 11573367-11573655_11573787-11573840_11574235-11574450_11574543-11574607	CGACACCGTCGGCCATTCGTTAATTAGCGCGTTCTTTGCAGAAAAATCCATAAGATTAGAATGAAAACGCGGTGGATGCTCGAGTGTCGTGTAAAATTCCAGAAAACGATGCCACGCAGTTCTCTCTCGGCATTTTTGCGATTGTGATATTATTATCGTTGTTATTAACGTCGAAGGACGTGTCTTTACGCATCGGCGACCGCGCGGCTGAACAAGCAGCGTAGAATAGATATTTGATGGCGGTGCAACGCGATTAAGAAAACTATCGATTGTCCCTGAATGATCGAAGGTACACCGGTGATTGTAACCCGCTCGACCATCGACTGGATGCGTTCTCTTTATGAGTGAATAAAGGACAGGAAATGAACGGTGAATTCATTGCAAAATTGTCGAACCGTT…
>TCONS_00028197 database_lncRNA_id:"100578361" GL630441.1 - 31036-31136_31411-31558_31720-31789_31871-32093_32601-32641	TCONS_00028197	XLOC_009496	database_lncRNA_id:"100578361"	GL630441.1	- 31036-31136_31411-31558_31720-31789_31871-32093_32601-32641	GTTTATTTAAATAAATTCGTGATACCATACATTTATTAGAAGTAGAAATGGACAATGTATAAATATTCCACATTGTGGAAATTATAATGGTCTAATCTCATGGTTTGTGTTGTAAAAATAAATACTGTGATGGAATATTTAAAGAACCTGTTAAAAAAAGAAAATTCAGGAACCGAAGCACATGTAAAGGAAGCAAAAACTCAGGAACAAGCACAATTGCTCAACTTTTGTCTGTAGAAGATAAAATCGAGATAAAGATCCGAGAATCCACTGCATTGTGTTTTTTTGAAATGAAAATAGTGAAGGAAGATTTGACTCTAGTCTTCTTGAATGTGAAAAAATTCATCCAATATGCACACTGTCACTGCACATACTGTCAATGTACACACTTTAAGATGG…
>TCONS_00542726 database_lncRNA_id:"100578365" chrLG2 - 9369947-9369994_9370115-9370902	TCONS_00542726	XLOC_150639	database_lncRNA_id:"100578365"	chrLG2	- 9369947-9369994_9370115-9370902	CGATAATAGAATGATACGATTTTTGCAACCGCATACACATATTCGCCAGAACGAACGAGTTTCATGTGTACAACGTGAAAGGATCGCCACGCCGGATATCTTCGGGGACGAAGAACTGGTCCACCCACTGGGAATTCCAGATTTTTTCCATCGGTTATCGAGCAGAGAGGAGCACGGGAAGCATGGACATGATCGATTCGCATCGATTTCGATTGAGAACGATTCTTATCGAGAAATGCGTGATTACAGCGACATCTAAGACATTTTGGCGGTTTTGCATTAAGGTTGCACCGAGAAAGTGTTTAGTGTTAATTTTTACGTTATACAAGTGAAGATTTTTAGTTAACAATCAAAGAAATACATTTAAACAATTGTTTTTTTAATGTTTTAAGTTTTTAT…
>TCONS_00330405 database_lncRNA_id:"100578367" chrLG12 - 10940236-10940914_10941042-10941132_10941292-10941432_10942410-10942625	TCONS_00330405	XLOC_095822	database_lncRNA_id:"100578367"	chrLG12	- 10940236-10940914_10941042-10941132_10941292-10941432_10942410-10942625	GCCCACTTCGTGAGACATCGGCAGAAGCCGAGATCGCCCGAACGCCCCGATCCCCCGATAGCGCCGTTTGATATCGTCCACCGTTGTACCTACTTTCGTACTTTCGTGCCTAACCTACGTACACACGCACTTTACCGTATGTCTGGTATTATGTGTTTATTTTGTATACACGTTCGCATCGACGATTCTCTATCTGGAGAATGGATTTACAGGAACTAAAAATTTTACGTTCAAGAATTATTAACCCTGATTAAAACAAAAACCGAAGAAATCGTTTCACGGTCTAGAGGTTACACGTCGAGGAAGGAATTACCAGTAAAGACCCGAAGGAAAGGAGTGAAAGATATATCAGAATAGGATTCATATTTACAAAAAAAAAAAATTATCACTAAATGAAAG…
>TCONS_00265636 database_lncRNA_id:"100578375" chrLG11 - 823483-824100_824187-825266_825370-825520	TCONS_00265636	XLOC_076550	database_lncRNA_id:"100578375"	chrLG11	- 823483-824100_824187-825266_825370-825520	TTGTAATCACATATAATGATATAAAAAAAATATTATTATATATATACATATATAAATTAATGAAAATATATAAGAAATAGATAATATAAATAAAAAAAATCAAACAAGGAAGGAATACACATCAATATTTCATCTATATAAATAAACAAGACAACCACACAAGAATGATCATTTTTTAATGTCTGGAACTCATTCTTCTACTTTAAAAAAACTTATGAGCCAACGAATCTTGAATTAGGATATCCATCGAGGAAAAAAATTCTTTTCTCTTCTTTCGCGGTTATCCATCGTCCGTGCTTAAAGTCCGCAGTTGCCACAGGAACGAATTCGTGGGATACCGCAAATCTTGAGGTTCCTCGTGCTAACACACATTCAGCGAACCCCTTCGATTTCCCGTAA…
>TCONS_00091823 database_lncRNA_id:"100578378" chrLG1 - 6683791-6684141_6684384-6684576_6685720-6686568	TCONS_00091823	XLOC_041113	database_lncRNA_id:"100578378"	chrLG1	- 6683791-6684141_6684384-6684576_6685720-6686568	CACTCTCTGCCTTTTTTTTTTGTTTGCAAAAGAAAGATGTCCCAGTTACGTGACTACATATAACCTCATATATATTTAGCTAAAATTCTTTATTGTGAAGTTTAAGCAAAATAAAAAATAGATATTAAATATTAAATAAATTTATCTTGCTCAAATATAATTTTATCTGTTCGTAAAACAGGATTTATATAATCAAATAAAACGGATATTTAAACTGAAATAAAATTCAAAACTAAATTCTTTCAACTTTAAAAAAAAAGAGAGAAGAAAAATTTAAATTATTTAAATTCTTATCTTCTAATAAATCATATCTTCTTTCATTTTTTATCGTTATTATATCAACACAAAATTTAATATGTCAAATAAGTTTGAATGATACATGAAATTGATAGATGGCGT…
>TCONS_00791994 database_lncRNA_id:"100578390" chrLG6 - 17269323-17269945_17270029-17270432	TCONS_00791994	XLOC_216897	database_lncRNA_id:"100578390"	chrLG6	- 17269323-17269945_17270029-17270432	AAAATAAAAAATGGTGCGATCAAAATAATGACCATTCACATTGATGCAGTAATCTTTTCGGGAATATATATATATTTATATACGTAAACAATGTATCAAAATAACATATACGAAAAATTAAGAAAGTAAATTTTTTATTCACATACGTCATAATAAAATGATTGTGATCGGAATGATGACCATTCACACTGATGCATAATTAAATTTCTTCGGAGATATACGAGAGTATGTATAAAAATTGAAGAATATACGAAGAATACAAAAAAATAAATAGACATTACTTACAAACACCAAAATGAAATGTTAATAATATGCGATATAATAACCATTTGCATTAACGCAATATTTAATAGCTTTCTTCAGGAATTATGTATTTCTATTTTTTATTTCCGGCTGAAT…
>TCONS_00795552 database_lncRNA_id:"100578391" chrLG6 + 17896482-17896539_17896661-17896771_17897477-17897567_17898201-17898259_17898922-17901556	TCONS_00795552	XLOC_208508	database_lncRNA_id:"100578391"	chrLG6	+ 17896482-17896539_17896661-17896771_17897477-17897567_17898201-17898259_17898922-17901556	GCGCATGTCATCAGTCTACAGTTGAAAATTGTGGTGACAGGTTGTTTCATCGGTAGAAAGTATTGTTTGGATTCGAGCTTTGAAGGCTTCGATATTTCGTAAACGTGGTAGATTTTGCACACACACCACGAAAATGAAGAGATAATTCGACGATTTTCGTGCAAATACGAGTCATCAATTTTCAATATGGATGCCAATTATAACAATTTATGGAAGGAAGACGAGATTTAAATTTGCATATAAAAGGAAAATGAATATAATTTTTGCAATAACTTTGGCTTACGATATTGATGGTAGTGCAGATTCATCGCTTCAATTGCTCAGGATTTTCTCAGTTTAATCCCTTCATTGCCAGGATCTCACTGTTATTTGGATGAGAGAGAGAAAGAGAGAGAGGCG…
>TCONS_00795553 database_lncRNA_id:"100578391" chrLG6 + 17896482-17896539_17896661-17896771_17897477-17897567_17897815-17897862_17898201-17898259_17898922-17901556	TCONS_00795553	XLOC_208508	database_lncRNA_id:"100578391"	chrLG6	+ 17896482-17896539_17896661-17896771_17897477-17897567_17897815-17897862_17898201-17898259_17898922-17901556	GCGCATGTCATCAGTCTACAGTTGAAAATTGTGGTGACAGGTTGTTTCATCGGTAGAAAGTATTGTTTGGATTCGAGCTTTGAAGGCTTCGATATTTCGTAAACGTGGTAGATTTTGCACACACACCACGAAAATGAAGAGATAATTCGACGATTTTCGTGCAAATACGAGTCATCAATTTTCAATATGGATGCCAATTATAACAATTTATGGAAGGAAGACGAGATTTAAATTTGCATATAAAAGGAAAATGAATATAAATCATTGTAATTGCATGCAATGCGGTCAATAGAGTCAGTGTTTGCTTCTTTTTGCAATAACTTTGGCTTACGATATTGATGGTAGTGCAGATTCATCGCTTCAATTGCTCAGGATTTTCTCAGTTTAATCCCTTCATTG…
>TCONS_00786835 database_lncRNA_id:"100578409" chrLG6 + 8776966-8777587_8777644-8777910_8777993-8778335_8778425-8778940_8779422-8780058	TCONS_00786835	XLOC_203612	database_lncRNA_id:"100578409"	chrLG6	+ 8776966-8777587_8777644-8777910_8777993-8778335_8778425-8778940_8779422-8780058	CTTTCGATTAATACTGCCAATAAATGAAAGAATATTATCCATATTTTCTTCAATAATCAACCAATCAAAACTTTCGCACAGAACAGAAAAAAAATCTCTCAAAATCATAAACGAAGCTATTTGTTAAAGAGTGACAATTTTCAACGAACACAACTCGACAATAAACTAAGAGAGCCGGCCCTGGAATCGGTTGCCTGTTGGAAATACCAGCACGTATCGGCACTAGAGGCACACTCGCACACTGCACTTCTGCATGGCGGAGTACGAACGGACGAACACACAGTCGGCTGGAATACGAATGCTGTGACCCGAGTAAATATATGCGATGCGCGCCGCTTCCTTGTAAACAAGGGCTGCTAAATGCCGTGAAGTGGCTCTCCGACTCGGGTCGAGGCCGCG…
>TCONS_00817123 database_lncRNA_id:"100578409" chrLG6 + 8776966-8777587_8777644-8777910_8777993-8778335_8778425-8778935_8779422-8780058	TCONS_00817123	XLOC_203612	database_lncRNA_id:"100578409"	chrLG6	+ 8776966-8777587_8777644-8777910_8777993-8778335_8778425-8778935_8779422-8780058	CTTTCGATTAATACTGCCAATAAATGAAAGAATATTATCCATATTTTCTTCAATAATCAACCAATCAAAACTTTCGCACAGAACAGAAAAAAAATCTCTCAAAATCATAAACGAAGCTATTTGTTAAAGAGTGACAATTTTCAACGAACACAACTCGACAATAAACTAAGAGAGCCGGCCCTGGAATCGGTTGCCTGTTGGAAATACCAGCACGTATCGGCACTAGAGGCACACTCGCACACTGCACTTCTGCATGGCGGAGTACGAACGGACGAACACACAGTCGGCTGGAATACGAATGCTGTGACCCGAGTAAATATATGCGATGCGCGCCGCTTCCTTGTAAACAAGGGCTGCTAAATGCCGTGAAGTGGCTCTCCGACTCGGGTCGAGGCCGCG…
>TCONS_00718060 database_lncRNA_id:"100578411" chrLG5 - 11486729-11487594_11487700-11488426	TCONS_00718060	XLOC_196036	database_lncRNA_id:"100578411"	chrLG5	- 11486729-11487594_11487700-11488426	AGATCATATCGTTTGAATATCATTTCTAATTACTTTTCTCATTAATTAATTAATTAATAATATAGATAAACAAGCCAAAAGTTGGAAAGATTTATTAATCGTATCAAAAACGGTAATAAATCCGTGGTCGAGCTAATAAGGGCGTTAGTGTTGAAAGGAGGGAGAAAAGGGAGCAATAATAACGAGAAAGATAGCAACTGAAGGTTTAGTGGACAAGGGTTAACGGGGTGAGGGAAAGCGGATGGAGGCTGAAGCCACGTGCTGCTGTCACTGGCACAGATTATATTATATAGGAATGGCAGCGAATAGGTGTAGATATAAGCGTCGAGCGGCAGTTAATAAATATGATAATGGCGGGTGAAGCGAGAGAAAGAGAGGTACGTGTGGGGTGCGATATGG…
>TCONS_00760732 database_lncRNA_id:"100578411" chrLG5 - 11486385-11487594_11487700-11487755_11488509-11489515_11490046-11490643_11490737-11491798	TCONS_00760732	XLOC_196036	database_lncRNA_id:"100578411"	chrLG5	- 11486385-11487594_11487700-11487755_11488509-11489515_11490046-11490643_11490737-11491798	GCCAAATCAACAATGATATTATAAAAAAATCATTTAATCTATAAACAATATGATTATTAAAATATAATTTAACCTATTATTTAAAGGAAAGGAAGTTCAAATATCTTATATCACGAAAAAGTTGGTTACATATTTTGTGAATGTTACGAACATTCGATGACCGAAATAAGAACAACGGTAAGATTCGGAGATTCAGTAATCGAATGAGCAATCGGATAGTAAAAAGAAGAAAGGTGACGAGATGCGACCCCCCGTGAGGTTTCCCGCGCGGGGCACCCGCCTGTCGATAATGTCCCATACCAGTTACCGACAAGAACTTCACCTGCGTAACGCTTCGATTCCGTGGTTGACCCCCCATGCGAAATGGGCCCCCTGCTTGCGTCATGTCGATTTCTTGAC…
>TCONS_00458866 database_lncRNA_id:"100578419" chrLG15 + 2230062-2230352_2230939-2231600	TCONS_00458866	XLOC_123050	database_lncRNA_id:"100578419"	chrLG15	+ 2230062-2230352_2230939-2231600	CGCGTATATTAACTGCTAATTTCATCGACAGTAATTAGCGCGCACGAGCGCGCGCCTGTCACGCGCTGATTTAATTGCACTCTCGCGGACACTCTCTTTACTTCCTCCCCCACCAGTCTTGTGGTGCATCTTTTCCGTTTCTCCGCTTGGAACCGATCGCGCCACCGTTCCCGCAACTAGCCTTCTTGTTTTGGTCGAATCTAATGAGTTTGTTTATCGCATTGACGAACTCACGATTAACCAGTGAATGGATGAAAATGACAGAAAGAAAACATCAATTTAATCGAACAGGATATCCGCGGATGCAGGAGGCAGCCGGCTGGGAGGATGACGGCGAGCGCGCAAGAGCGAGAAGTCGGTAACTTAACTGGCCTAAATGGGTTTAACTCGATGTGATTT…
>TCONS_00479860 database_lncRNA_id:"100578419" chrLG15 + 2230110-2230352_2230579-2231603	TCONS_00479860	XLOC_123050	database_lncRNA_id:"100578419"	chrLG15	+ 2230110-2230352_2230579-2231603	CGCGCGCCTGTCACGCGCTGATTTAATTGCACTCTCGCGGACACTCTCTTTACTTCCTCCCCCACCAGTCTTGTGGTGCATCTTTTCCGTTTCTCCGCTTGGAACCGATCGCGCCACCGTTCCCGCAACTAGCCTTCTTGTTTTGGTCGAATCTAATGAGTTTGTTTATCGCATTGACGAACTCACGATTAACCAGTGAATGGATGAAAATGACAGAAAGAAAACATCAATTTAATCGAACAGACAGAAATTATATATTTCATATATAATTTGATATTAATATAAAAGGTGATGGATATAGAACGTAAAGAATAAAAATCATCCAATAATATAATTTTATAACTTTTATTCCAATTTCTACATAAATTATATTATAATTTGTGATGATATTTTATGATG…
>TCONS_00493445 database_lncRNA_id:"100578419" chrLG15 + 2230201-2230352_2230579-2230733_2230939-2231699_2235211-2235520	TCONS_00493445	XLOC_123050	database_lncRNA_id:"100578419"	chrLG15	+ 2230201-2230352_2230579-2230733_2230939-2231699_2235211-2235520	TCTCCGCTTGGAACCGATCGCGCCACCGTTCCCGCAACTAGCCTTCTTGTTTTGGTCGAATCTAATGAGTTTGTTTATCGCATTGACGAACTCACGATTAACCAGTGAATGGATGAAAATGACAGAAAGAAAACATCAATTTAATCGAACAGACAGAAATTATATATTTCATATATAATTTGATATTAATATAAAAGGTGATGGATATAGAACGTAAAGAATAAAAATCATCCAATAATATAATTTTATAACTTTTATTCCAATTTCTACATAAATTATATTATAATTTGTGATGATATTTTATGATGATATCCGCGGATGCAGGAGGCAGCCGGCTGGGAGGATGACGGCGAGCGCGCAAGAGCGAGAAGTCGGTAACTTAACTGGCCTAAATGGGTT…
>TCONS_00572215 database_lncRNA_id:"100578436" chrLG2 + 9872901-9873143_9899663-9900112	TCONS_00572215	XLOC_143782	database_lncRNA_id:"100578436"	chrLG2	+ 9872901-9873143_9899663-9900112	CTTCTTTTCCTCGAGCTAATCCTCCGTTAAACGTCGTTTTCGAAAAAGTTTAATAGGTGGTGGAATAAAAGGGGACGTGGAGAGGTGTCTTTCGAAGGCGAGCGATTTTCTTCTTGCGAACAAAGAGAGTCGAGGCAATATCGTTTTGGACGGAGATTTGGCTACATGTAATTGGACACATCGAATTTGCATCGGGTTTGGATGCAAGCGGCCGACATCCTTGCGATTCCACCGTTTATAAACTTACGAAGAGGAATGTCCATCATCTACCACTTTGAACCACTTTGGATTCGTGAGCTTGTATCGTAACTATCAACTCGTATCTATATCACGATCCATGAATGATCGTATGAATGCGTAGCTAGCTGTCCAATAGCCCCATAGAGAATGATCCATGAC…
[truncated: 12,205 more rows]
[truncated: 1 more columns]

## Sheet: DE miRNAs_Queen_Virgin
DE miRNAs in ovary activation process
sRNA	Que_readcount	Vir_readcount	log2FoldChange	pval	padj
ame-miR-31a	43.6362	2505.64	-5.7363	2.0422e-79	3.0838e-77
ame-miR-1	1192.97	16690.9	-3.7334	4.5328e-53	3.4222e-51
ame-miR-252a	572.076	2588.53	-2.1597	5.7032e-46	2.8706e-44
ame-miR-87	6087.06	25641.6	-2.0576	9.5953e-37	3.6222e-35
[truncated: 77 more rows]

## Sheet: DE miRNAs_Caged_Queen
DE miRNAs in oviposition inhibition process
[truncated: 14 more rows]

[truncated: 1 more sheets: DE miRNAs_Released_Caged]
