# Supplementary material for: Integration of lncRNA–miRNA–mRNA reveals novel insights into oviposition regulation in honey bees
Source: PeerJ. 2017 Oct 5;5:e3881. doi: 10.7717/peerj.3881 (PMC5632538; doi:10.7717/peerj.3881)
Supplement: Table S4 [file peerj-05-3881-s004.xlsx]

## Sheet: GO terms with DE lncRNA_Que_Vir
Enriched GO terms for DE lncRNAs in ovary activation process
GO_accession	Description	Term_type	Over_represented_pValue	Corrected_pValue	DEG_item	DEG_list	Bg_item	Bg_list	Gene_names
GO:0009987	cellular process	biological_process	1.3063e-145	1.2759e-141	2686	3767	6628	12231	FBgn0000482,FBgn0030421,FBgn0263974,FBgn0001202,FBgn0051760,FBgn0260639,FBgn0086372,FBgn0002542,FBgn0034883,FBgn0052479,FBgn0041585,FBgn0039588,FBgn0040780,FBgn0036973,FBgn0034063,FBgn0052174,FBgn0000206,FBgn0023076,FBgn0051028,FBgn0030500,FBgn0003218,FBgn0037248,FBgn0013269,FBgn0005278,FBgn0037473,FBgn0025335,FBgn0013811,FBgn0033480,FBgn0003041,FBgn0014863,FBgn0027569,FBgn0024179,FBgn0028992,FBg…
GO:0044763	single-organism cellular process	biological_process	2.4592e-132	1.2009e-128	2207	3767	5158	12231	FBgn0027057,FBgn0003430,FBgn0024189,FBgn0026620,FBgn0011589,FBgn0024238,FBgn0040071,FBgn0260003,FBgn0031868,FBgn0035411,FBgn0015371,FBgn0025800,FBgn0053558,FBgn0038074,FBgn0037481,FBgn0014133,FBgn0011202,FBgn0051523,FBgn0264855,FBgn0028734,FBgn0023510,FBgn0003330,FBgn0034009,FBgn0260749,FBgn0265523,FBgn0032929,FBgn0038438,FBgn0083945,FBgn0039488,FBgn0004102,FBgn0028500,FBgn0016047,FBgn0025825,FBg…
GO:0044699	single-organism process	biological_process	3.0676e-113	9.9871e-110	2599	3767	6591	12231	FBgn0010770,FBgn0261588,FBgn0013810,FBgn0044323,FBgn0086442,FBgn0011280,FBgn0266757,FBgn0032938,FBgn0039528,FBgn0038402,FBgn0266756,FBgn0267435,FBgn0261647,FBgn0029158,FBgn0011300,FBgn0039156,FBgn0265434,FBgn0034136,FBgn0002887,FBgn0044324,FBgn0050035,FBgn0020655,FBgn0264357,FBgn0003256,FBgn0004924,FBgn0011648,FBgn0040068,FBgn0015714,FBgn0085426,FBgn0000283,FBgn0034497,FBgn0004635,FBgn0000562,FBg…
GO:0005623	cell	cellular_component	1.2234e-106	2.3899e-103	2293	3767	5637	12231	FBgn0000064,FBgn0040064,FBgn0030871,FBgn0026573,FBgn0030310,FBgn0264975,FBgn0000547,FBgn0032243,FBgn0023023,FBgn0031437,FBgn0003447,FBgn0015621,FBgn0061200,FBgn0020236,FBgn0004197,FBgn0031263,FBgn0038303,FBgn0034491,FBgn0026141,FBgn0027835,FBgn0020372,FBgn0031495,FBgn0034060,FBgn0004875,FBgn0014029,FBgn0260940,FBgn0002567,FBgn0053862,FBgn0027948,FBgn0010422,FBgn0016756,FBgn0021895,FBgn0036850,FBg…
GO:0044464	cell part	cellular_component	1.2234e-106	2.3899e-103	2293	3767	5637	12231	FBgn0031016,FBgn0031814,FBgn0019949,FBgn0008635,FBgn0038149,FBgn0261872,FBgn0034500,FBgn0002441,FBgn0039464,FBgn0029504,FBgn0039938,FBgn0051224,FBgn0001491,FBgn0266758,FBgn0001179,FBgn0004009,FBgn0016691,FBgn0086757,FBgn0034109,FBgn0031668,FBgn0001233,FBgn0033696,FBgn0033246,FBgn0003074,FBgn0259212,FBgn0038499,FBgn0261458,FBgn0004842,FBgn0039668,FBgn0010215,FBgn0052704,FBgn0037737,FBgn0267351,FBg…
GO:0065007	biological regulation	biological_process	3.3337e-106	5.4267e-103	1523	3767	3304	12231	FBgn0001122,FBgn0003090,FBgn0031670,FBgn0263864,FBgn0052666,FBgn0031799,FBgn0023172,FBgn0031885,FBgn0033486,FBgn0036277,FBgn0026562,FBgn0039227,FBgn0265137,FBgn0029976,FBgn0013726,FBgn0038504,FBgn0261278,FBgn0003206,FBgn0030766,FBgn0028999,FBgn0028387,FBgn0031392,FBgn0012051,FBgn0003023,FBgn0031005,FBgn0004638,FBgn0002174,FBgn0042630,FBgn0261697,FBgn0035432,FBgn0017581,FBgn0037917,FBgn0002924,FBg…
GO:0048731	system development	biological_process	3.1279e-103	4.3643e-100	1113	3767	2199	12231	FBgn0264962,FBgn0263510,FBgn0032475,FBgn0000562,FBgn0000307,FBgn0004635,FBgn0013751,FBgn0040068,FBgn0011648,FBgn0263933,FBgn0265998,FBgn0038597,FBgn0038167,FBgn0034070,FBgn0003984,FBgn0004657,FBgn0004170,FBgn0000422,FBgn0266369,FBgn0026375,FBgn0260985,FBgn0025381,FBgn0038402,FBgn0024920,FBgn0267435,FBgn0035632,FBgn0266756,FBgn0039528,FBgn0025571,FBgn0044323,FBgn0000239,FBgn0010770,FBgn0261588,FBg…
GO:0050789	regulation of biological process	biological_process	5.4708e-102	6.6791e-99	1416	3767	3031	12231	FBgn0000384,FBgn0015509,FBgn0004363,FBgn0003268,FBgn0000108,FBgn0022740,FBgn0052133,FBgn0263231,FBgn0003048,FBgn0027592,FBgn0037100,FBgn0003687,FBgn0029688,FBgn0035916,FBgn0029881,FBgn0027620,FBgn0015524,FBgn0004622,FBgn0030959,FBgn0013469,FBgn0038916,FBgn0031145,FBgn0031115,FBgn0037203,FBgn0035060,FBgn0001139,FBgn0011474,FBgn0028743,FBgn0036974,FBgn0086346,FBgn0002576,FBgn0032321,FBgn0030257,FBg…
GO:0044767	single-organism developmental process	biological_process	1.0216e-97	1.1086e-94	1495	3767	3285	12231	FBgn0010380,FBgn0038916,FBgn0013469,FBgn0015524,FBgn0027620,FBgn0029672,FBgn0038294,FBgn0035524,FBgn0029688,FBgn0029881,FBgn0033092,FBgn0263231,FBgn0052133,FBgn0022740,FBgn0000108,FBgn0002641,FBgn0036101,FBgn0003048,FBgn0000384,FBgn0035875,FBgn0035762,FBgn0034049,FBgn0004363,FBgn0015509,FBgn0011604,FBgn0004390,FBgn0044826,FBgn0260439,FBgn0000578,FBgn0016081,FBgn0034408,FBgn0033557,FBgn0032499,FBg…
GO:0048856	anatomical structure development	biological_process	1.3367e-97	1.3055e-94	1393	3767	2997	12231	FBgn0004396,FBgn0262867,FBgn0053505,FBgn0265726,FBgn0262559,FBgn0259210,FBgn0019947,FBgn0003042,FBgn0003654,FBgn0031781,FBgn0000490,FBgn0010750,FBgn0005655,FBgn0005638,FBgn0262699,FBgn0029512,FBgn0038874,FBgn0030855,FBgn0013263,FBgn0039924,FBgn0034646,FBgn0260934,FBgn0264959,FBgn0263289,FBgn0032956,FBgn0024227,FBgn0036919,FBgn0086677,FBgn0015218,FBgn0011836,FBgn0028427,FBgn0028544,FBgn0086712,FBg…
GO:0032502	developmental process	biological_process	1.8762e-97	1.6659e-94	1509	3767	3327	12231	FBgn0024963,FBgn0041582,FBgn0003334,FBgn0086712,FBgn0036450,FBgn0028544,FBgn0011836,FBgn0028427,FBgn0086677,FBgn0036919,FBgn0015218,FBgn0024227,FBgn0260934,FBgn0264959,FBgn0263289,FBgn0037874,FBgn0032956,FBgn0039924,FBgn0034646,FBgn0262699,FBgn0029512,FBgn0038874,FBgn0030855,FBgn0013263,FBgn0005638,FBgn0005655,FBgn0000490,FBgn0036816,FBgn0010750,FBgn0265726,FBgn0262559,FBgn0053505,FBgn0019947,FBg…
GO:0050794	regulation of cellular process	biological_process	2.2428e-97	1.8255e-94	1329	3767	2820	12231	FBgn0085409,FBgn0260866,FBgn0031450,FBgn0261983,FBgn0000319,FBgn0003513,FBgn0045035,FBgn0010300,FBgn0036494,FBgn0260742,FBgn0032633,FBgn0024371,FBgn0260444,FBgn0046704,FBgn0264001,FBgn0037551,FBgn0000173,FBgn0003317,FBgn0037792,FBgn0015622,FBgn0003416,FBgn0000139,FBgn0263237,FBgn0024277,FBgn0019972,FBgn0264922,FBgn0262527,FBgn0000119,FBgn0261549,FBgn0020429,FBgn0261524,FBgn0263593,FBgn0013799,FBg…
GO:0005488	binding	molecular_function	2.1587e-93	1.6219e-90	2312	3767	5816	12231	FBgn0036926,FBgn0039054,FBgn0031474,FBgn0038745,FBgn0040066,FBgn0030617,FBgn0039925,FBgn0031824,FBgn0031266,FBgn0003638,FBgn0039055,FBgn0261931,FBgn0037963,FBgn0053547,FBgn0022893,FBgn0033886,FBgn0086680,FBgn0040080,FBgn0037135,FBgn0031573,FBgn0011740,FBgn0037624,FBgn0038163,FBgn0035205,FBgn0024836,FBgn0004369,FBgn0033994,FBgn0262743,FBgn0000317,FBgn0250819,FBgn0050021,FBgn0036147,FBgn0003169,FBg…
GO:0005515	protein binding	molecular_function	9.5095e-93	6.6342e-90	1391	3767	3026	12231	FBgn0000097,FBgn0014395,FBgn0039257,FBgn0039120,FBgn0026430,FBgn0035357,FBgn0053556,FBgn0003261,FBgn0037015,FBgn0011763,FBgn0086916,FBgn0040273,FBgn0040318,FBgn0262733,FBgn0037540,FBgn0000546,FBgn0005640,FBgn0015024,FBgn0024811,FBgn0038869,FBgn0034068,FBgn0036660,FBgn0051716,FBgn0032105,FBgn0263987,FBgn0259108,FBgn0035410,FBgn0033901,FBgn0015283,FBgn0000114,FBgn0030869,FBgn0262127,FBgn0010328,FBg…
GO:0007275	multicellular organismal development	biological_process	1.5232e-92	9.918e-90	1295	3767	2759	12231	FBgn0001325,FBgn0034231,FBgn0026619,FBgn0040283,FBgn0029094,FBgn0003089,FBgn0019960,FBgn0027548,FBgn0263112,FBgn0037021,FBgn0040281,FBgn0004509,FBgn0032515,FBgn0025878,FBgn0264493,FBgn0004859,FBgn0042083,FBgn0000564,FBgn0030341,FBgn0023518,FBgn0033075,FBgn0015754,FBgn0011592,FBgn0011766,FBgn0029891,FBgn0029709,FBgn0051475,FBgn0034967,FBgn0016078,FBgn0024222,FBgn0036487,FBgn0011232,FBgn0021818,FBg…
GO:0005622	intracellular	cellular_component	1.2823e-89	7.8274e-87	1996	3767	4847	12231	FBgn0010226,FBgn0052230,FBgn0085451,FBgn0038274,FBgn0015268,FBgn0263995,FBgn0261385,FBgn0011769,FBgn0031213,FBgn0028685,FBgn0033460,FBgn0029117,FBgn0050404,FBgn0038535,FBgn0265003,FBgn0000473,FBgn0035590,FBgn0039218,FBgn0033902,FBgn0032287,FBgn0015589,FBgn0261617,FBgn0003139,FBgn0001235,FBgn0266557,FBgn0025682,FBgn0039532,FBgn0086359,FBgn0001332,FBgn0086895,FBgn0031422,FBgn0036995,FBgn0030518,FBg…
GO:0044424	intracellular part	cellular_component	1.0315e-88	5.9264e-86	1965	3767	4759	12231	FBgn0020270,FBgn0031114,FBgn0004510,FBgn0004888,FBgn0004868,FBgn0004378,FBgn0000577,FBgn0086613,FBgn0011286,FBgn0053158,FBgn0026317,FBgn0036570,FBgn0026582,FBgn0000257,FBgn0265276,FBgn0259824,FBgn0005411,FBgn0031955,FBgn0033391,FBgn0005666,FBgn0030089,FBgn0265597,FBgn0264075,FBgn0011737,FBgn0004837,FBgn0025638,FBgn0039710,FBgn0033749,FBgn0039674,FBgn0050392,FBgn0011692,FBgn0020309,FBgn0259174,FBg…
GO:0048869	cellular developmental process	biological_process	7.5046e-83	4.0721e-80	1095	3767	2278	12231	FBgn0051092,FBgn0002917,FBgn0024285,FBgn0024836,FBgn0000464,FBgn0040080,FBgn0002735,FBgn0050021,FBgn0038325,FBgn0036147,FBgn0003169,FBgn0267795,FBgn0004369,FBgn0023177,FBgn0262743,FBgn0032848,FBgn0000317,FBgn0032949,FBgn0040066,FBgn0039925,FBgn0025391,FBgn0024320,FBgn0004556,FBgn0036696,FBgn0033155,FBgn0053547,FBgn0086680,FBgn0033886,FBgn0034921,FBgn0003483,FBgn0001083,FBgn0040068,FBgn0011648,FBg…
GO:0016043	cellular component organization	biological_process	1.2177e-82	6.2598e-80	1161	3767	2459	12231	FBgn0086362,FBgn0015268,FBgn0038274,FBgn0033460,FBgn0261385,FBgn0029117,FBgn0035590,FBgn0033902,FBgn0015589,FBgn0039532,FBgn0004449,FBgn0025682,FBgn0266557,FBgn0261617,FBgn0036995,FBgn0086359,FBgn0027889,FBgn0039927,FBgn0037777,FBgn0022344,FBgn0037138,FBgn0014343,FBgn0035947,FBgn0041775,FBgn0263598,FBgn0026326,FBgn0264691,FBgn0264442,FBgn0031549,FBgn0035402,FBgn0000182,FBgn0023489,FBgn0040505,FBg…
GO:0071840	cellular component organization or biogenesis	biological_process	2.4182e-82	1.1809e-79	1181	3767	2516	12231	FBgn0266450,FBgn0026630,FBgn0034577,FBgn0003742,FBgn0035295,FBgn0020261,FBgn0000382,FBgn0266098,FBgn0015019,FBgn0264291,FBgn0035206,FBgn0259483,FBgn0004237,FBgn0019830,FBgn0002466,FBgn0034012,FBgn0031255,FBgn0004650,FBgn0034135,FBgn0031601,FBgn0262111,FBgn0023423,FBgn0021760,FBgn0011817,FBgn0025836,FBgn0041191,FBgn0004864,FBgn0040022,FBgn0038746,FBgn0015797,FBgn0030800,FBgn0000320,FBgn0036486,FBg…
GO:0009653	anatomical structure morphogenesis	biological_process	9.9466e-82	4.6261e-79	870	3767	1692	12231	FBgn0031437,FBgn0010575,FBgn0003447,FBgn0005630,FBgn0014857,FBgn0024236,FBgn0004197,FBgn0038432,FBgn0010235,FBgn0000581,FBgn0032248,FBgn0264785,FBgn0266717,FBgn0025463,FBgn0262125,FBgn0036740,FBgn0000633,FBgn0010379,FBgn0016075,FBgn0265356,FBgn0013997,FBgn0026181,FBgn0261086,FBgn0262114,FBgn0264975,FBgn0000547,FBgn0031779,FBgn0032812,FBgn0016756,FBgn0030941,FBgn0033988,FBgn0000629,FBgn0004607,FBg…
GO:0044707	single-multicellular organism process	biological_process	1.1664e-80	5.1781e-78	1456	3767	3305	12231	FBgn0000307,FBgn0004635,FBgn0032475,FBgn0264962,FBgn0263510,FBgn0000562,FBgn0000283,FBgn0033603,FBgn0013751,FBgn0040068,FBgn0011648,FBgn0000500,FBgn0265998,FBgn0038597,FBgn0038167,FBgn0263933,FBgn0263278,FBgn0014006,FBgn0004657,FBgn0003984,FBgn0034070,FBgn0026375,FBgn0039008,FBgn0266369,FBgn0001301,FBgn0004170,FBgn0000422,FBgn0011581,FBgn0025381,FBgn0260985,FBgn0266756,FBgn0035632,FBgn0267435,FBg…
GO:0030154	cell differentiation	biological_process	1.4169e-76	6.0168e-74	1044	3767	2183	12231	FBgn0031988,FBgn0052676,FBgn0029176,FBgn0033160,FBgn0004242,FBgn0086368,FBgn0262738,FBgn0038585,FBgn0024985,FBgn0036574,FBgn0010583,FBgn0003888,FBgn0028343,FBgn0005322,FBgn0085443,FBgn0261786,FBgn0039132,FBgn0086906,FBgn0021818,FBgn0036487,FBgn0011232,FBgn0036641,FBgn0000183,FBgn0032643,FBgn0036895,FBgn0011205,FBgn0020224,FBgn0032629,FBgn0262516,FBgn0029161,FBgn0035497,FBgn0031734,FBgn0030000,FBg…
GO:0044237	cellular metabolic process	biological_process	5.703e-73	2.3209e-70	1663	3767	3983	12231	FBgn0003732,FBgn0027506,FBgn0037801,FBgn0026192,FBgn0028837,FBgn0030631,FBgn0010352,FBgn0003254,FBgn0019650,FBgn0031877,FBgn0263600,FBgn0011715,FBgn0004698,FBgn0025592,FBgn0033518,FBgn0035462,FBgn0265351,FBgn0004514,FBgn0001222,FBgn0261238,FBgn0023509,FBgn0004618,FBgn0010909,FBgn0040294,FBgn0262081,FBgn0004644,FBgn0259937,FBgn0061476,FBgn0015829,FBgn0085450,FBgn0025625,FBgn0029789,FBgn0001269,FBg…
GO:0007399	nervous system development	biological_process	7.7795e-70	3.0393e-67	794	3767	1567	12231	FBgn0034528,FBgn0010434,FBgn0001138,FBgn0033264,FBgn0259984,FBgn0053051,FBgn0039125,FBgn0000320,FBgn0030800,FBgn0025725,FBgn0024179,FBgn0015797,FBgn0035106,FBgn0031866,FBgn0038746,FBgn0003041,FBgn0004864,FBgn0041191,FBgn0001978,FBgn0033206,FBgn0011817,FBgn0035194,FBgn0000479,FBgn0033379,FBgn0086356,FBgn0035026,FBgn0000448,FBgn0002121,FBgn0262111,FBgn0031601,FBgn0086444,FBgn0021760,FBgn0023423,FBg…
GO:0043226	organelle	cellular_component	3.4928e-68	1.3121e-65	1674	3767	4062	12231	FBgn0264954,FBgn0032340,FBgn0026144,FBgn0004913,FBgn0005596,FBgn0015582,FBgn0011571,FBgn0005636,FBgn0034697,FBgn0037884,FBgn0030877,FBgn0051118,FBgn0022724,FBgn0265297,FBgn0039737,FBgn0051036,FBgn0266579,FBgn0025724,FBgn0037255,FBgn0020255,FBgn0044419,FBgn0014143,FBgn0039877,FBgn0031947,FBgn0026179,FBgn0267698,FBgn0023216,FBgn0027610,FBgn0011642,FBgn0004856,FBgn0033859,FBgn0086706,FBgn0051116,FBg…
GO:0048513	organ development	biological_process	3.3455e-67	1.2102e-64	654	3767	1228	12231	FBgn0016977,FBgn0002573,FBgn0082582,FBgn0261437,FBgn0031005,FBgn0004638,FBgn0012051,FBgn0040372,FBgn0265174,FBgn0004897,FBgn0261014,FBgn0051145,FBgn0264492,FBgn0010314,FBgn0261239,FBgn0001624,FBgn0045073,FBgn0032006,FBgn0010341,FBgn0262866,FBgn0261648,FBgn0261556,FBgn0037917,FBgn0038042,FBgn0031885,FBgn0023172,FBgn0034180,FBgn0052666,FBgn0263864,FBgn0038197,FBgn0015402,FBgn0003090,FBgn0000352,FBg…
GO:0043229	intracellular organelle	cellular_component	5.0621e-67	1.7658e-64	1652	3767	4007	12231	FBgn0000289,FBgn0040022,FBgn0038746,FBgn0035106,FBgn0015797,FBgn0004432,FBgn0082585,FBgn0004914,FBgn0004870,FBgn0027505,FBgn0261279,FBgn0035194,FBgn0023535,FBgn0004864,FBgn0052418,FBgn0033264,FBgn0015737,FBgn0003308,FBgn0027779,FBgn0010434,FBgn0000320,FBgn0036486,FBgn0035206,FBgn0015019,FBgn0264291,FBgn0032229,FBgn0031312,FBgn0259483,FBgn0003742,FBgn0035295,FBgn0024921,FBgn0266450,FBgn0034577,FBg…
GO:0048468	cell development	biological_process	6.2767e-63	2.1139e-60	720	3767	1419	12231	FBgn0030057,FBgn0005612,FBgn0036044,FBgn0261793,FBgn0045852,FBgn0263102,FBgn0261836,FBgn0011211,FBgn0026597,FBgn0038223,FBgn0039909,FBgn0000139,FBgn0262527,FBgn0264922,FBgn0010452,FBgn0034451,FBgn0024277,FBgn0019972,FBgn0261524,FBgn0003943,FBgn0000499,FBgn0043903,FBgn0031304,FBgn0011771,FBgn0000173,FBgn0000535,FBgn0004028,FBgn0003317,FBgn0003053,FBgn0003416,FBgn0004889,FBgn0033846,FBgn0000543,FBg…
GO:0044260	cellular macromolecule metabolic process	biological_process	5.2463e-61	1.708e-58	1306	3767	3042	12231	FBgn0032054,FBgn0033480,FBgn0001138,FBgn0015546,FBgn0038515,FBgn0013269,FBgn0037248,FBgn0028476,FBgn0001978,FBgn0003557,FBgn0002431,FBgn0000448,FBgn0038872,FBgn0002121,FBgn0002044,FBgn0024179,FBgn0002542,FBgn0263974,FBgn0020391,FBgn0086444,FBgn0037573,FBgn0038603,FBgn0000482,FBgn0260990,FBgn0010269,FBgn0038870,FBgn0031208,FBgn0028550,FBgn0023076,FBgn0000206,FBgn0033166,FBgn0039234,FBgn0036973,FBg…
GO:0022008	neurogenesis	biological_process	6.3502e-59	2.0007e-56	692	3767	1372	12231	FBgn0003334,FBgn0266452,FBgn0024963,FBgn0032821,FBgn0259113,FBgn0039337,FBgn0086677,FBgn0002973,FBgn0005648,FBgn0015218,FBgn0035719,FBgn0052056,FBgn0001965,FBgn0011836,FBgn0020653,FBgn0001168,FBgn0263289,FBgn0260934,FBgn0032956,FBgn0029941,FBgn0024227,FBgn0038874,FBgn0029512,FBgn0262699,FBgn0030855,FBgn0036376,FBgn0053193,FBgn0005655,FBgn0261984,FBgn0019947,FBgn0259210,FBgn0061469,FBgn0053505,FBg…
GO:0032501	multicellular organismal process	biological_process	9.897e-58	3.0208e-55	1537	3767	3755	12231	FBgn0051005,FBgn0262169,FBgn0041709,FBgn0001086,FBgn0024889,FBgn0015296,FBgn0000212,FBgn0000299,FBgn0001075,FBgn0262160,FBgn0030018,FBgn0031981,FBgn0011207,FBgn0030887,FBgn0004858,FBgn0000996,FBgn0259789,FBgn0023097,FBgn0026370,FBgn0003118,FBgn0003731,FBgn0032421,FBgn0051216,FBgn0037137,FBgn0034877,FBgn0003380,FBgn0038760,FBgn0033688,FBgn0004117,FBgn0031882,FBgn0033447,FBgn0002922,FBgn0003165,FBg…
GO:0007154	cell communication	biological_process	3.6832e-57	1.0901e-54	814	3767	1703	12231	FBgn0036789,FBgn0261456,FBgn0035993,FBgn0028500,FBgn0036141,FBgn0003499,FBgn0031950,FBgn0031762,FBgn0033987,FBgn0261573,FBgn0003612,FBgn0003371,FBgn0000163,FBgn0001150,FBgn0036289,FBgn0262870,FBgn0020251,FBgn0040475,FBgn0263076,FBgn0264855,FBgn0028734,FBgn0035733,FBgn0023510,FBgn0265082,FBgn0017550,FBgn0011785,FBgn0265523,FBgn0260749,FBgn0038438,FBgn0030600,FBgn0053196,FBgn0026317,FBgn0036934,FBg…
GO:0051716	cellular response to stimulus	biological_process	4.2078e-56	1.2087e-53	807	3767	1692	12231	FBgn0025740,FBgn0261850,FBgn0050440,FBgn0035010,FBgn0036490,FBgn0043884,FBgn0028509,FBgn0037359,FBgn0026143,FBgn0000490,FBgn0032020,FBgn0261387,FBgn0019947,FBgn0024326,FBgn0005638,FBgn0261984,FBgn0050382,FBgn0005655,FBgn0053193,FBgn0050340,FBgn0039924,FBgn0036376,FBgn0023441,FBgn0038874,FBgn0028538,FBgn0039282,FBgn0260934,FBgn0264959,FBgn0037874,FBgn0011836,FBgn0039875,FBgn0035719,FBgn0001965,FBg…
GO:0023052	signaling	biological_process	6.3779e-56	1.7304e-53	796	3767	1664	12231	FBgn0036789,FBgn0261456,FBgn0035993,FBgn0036141,FBgn0028500,FBgn0031950,FBgn0003499,FBgn0031762,FBgn0261573,FBgn0003612,FBgn0033987,FBgn0003371,FBgn0000163,FBgn0001150,FBgn0262870,FBgn0036289,FBgn0020251,FBgn0263076,FBgn0264855,FBgn0028734,FBgn0035733,FBgn0023510,FBgn0265082,FBgn0017550,FBgn0011785,FBgn0265523,FBgn0260749,FBgn0038438,FBgn0053196,FBgn0030600,FBgn0026317,FBgn0036934,FBgn0040071,FBg…
GO:0044700	single organism signaling	biological_process	6.3779e-56	1.7304e-53	796	3767	1664	12231	FBgn0262473,FBgn0042085,FBgn0029123,FBgn0024941,FBgn0010660,FBgn0036702,FBgn0024814,FBgn0033483,FBgn0260940,FBgn0266719,FBgn0002567,FBgn0039966,FBgn0036373,FBgn0001079,FBgn0030941,FBgn0035853,FBgn0039747,FBgn0036980,FBgn0263131,FBgn0015379,FBgn0035499,FBgn0031455,FBgn0020493,FBgn0262647,FBgn0036740,FBgn0023511,FBgn0023023,FBgn0086371,FBgn0039302,FBgn0024230,FBgn0264975,FBgn0262114,FBgn0000547,FBg…
GO:0048519	negative regulation of biological process	biological_process	1.691e-55	4.4638e-53	566	3767	1074	12231	FBgn0039282,FBgn0264959,FBgn0260934,FBgn0263289,FBgn0037874,FBgn0035719,FBgn0001965,FBgn0001168,FBgn0002973,FBgn0086677,FBgn0086712,FBgn0041582,FBgn0011837,FBgn0003334,FBgn0261850,FBgn0025740,FBgn0043884,FBgn0026143,FBgn0000490,FBgn0005695,FBgn0019947,FBgn0003042,FBgn0053193,FBgn0034646,FBgn0262699,FBgn0013263,FBgn0002901,FBgn0260940,FBgn0004606,FBgn0033483,FBgn0003028,FBgn0010660,FBgn0033917,FBg…
GO:0050896	response to stimulus	biological_process	3.1968e-55	8.2167e-53	1131	3767	2593	12231	FBgn0003042,FBgn0031781,FBgn0261387,FBgn0019947,FBgn0026399,FBgn0000490,FBgn0037359,FBgn0050440,FBgn0030545,FBgn0035010,FBgn0023441,FBgn0038874,FBgn0039924,FBgn0050382,FBgn0005655,FBgn0005638,FBgn0086677,FBgn0028427,FBgn0039875,FBgn0011836,FBgn0032026,FBgn0037874,FBgn0264959,FBgn0260934,FBgn0263289,FBgn0039282,FBgn0022355,FBgn0035169,FBgn0024987,FBgn0037705,FBgn0261532,FBgn0036994,FBgn0086712,FBg…
GO:0048523	negative regulation of cellular process	biological_process	8.0772e-55	2.0228e-52	510	3767	940	12231	FBgn0086677,FBgn0259174,FBgn0002973,FBgn0039710,FBgn0001168,FBgn0001965,FBgn0035719,FBgn0027057,FBgn0020309,FBgn0003430,FBgn0011737,FBgn0004837,FBgn0037874,FBgn0025638,FBgn0263289,FBgn0260934,FBgn0264959,FBgn0039282,FBgn0026620,FBgn0264075,FBgn0265276,FBgn0026317,FBgn0011837,FBgn0041582,FBgn0021814,FBgn0000257,FBgn0004378,FBgn0053558,FBgn0025800,FBgn0000577,FBgn0037481,FBgn0086613,FBgn0020270,FBg…
GO:0043227	membrane-bounded organelle	cellular_component	5.7463e-54	1.4031e-51	1383	3767	3336	12231	FBgn0040344,FBgn0034649,FBgn0053526,FBgn0036487,FBgn0011232,FBgn0031492,FBgn0036641,FBgn0031314,FBgn0000183,FBgn0032643,FBgn0039635,FBgn0003231,FBgn0035134,FBgn0020224,FBgn0262516,FBgn0028926,FBgn0029161,FBgn0037050,FBgn0011481,FBgn0044871,FBgn0029870,FBgn0034729,FBgn0034081,FBgn0023537,FBgn0029800,FBgn0033160,FBgn0004242,FBgn0029176,FBgn0086368,FBgn0040340,FBgn0004387,FBgn0038585,FBgn0025352,FBg…
GO:0048699	generation of neurons	biological_process	1.1301e-53	2.6921e-51	472	3767	854	12231	FBgn0024963,FBgn0037671,FBgn0031955,FBgn0003334,FBgn0015371,FBgn0031114,FBgn0037481,FBgn0002565,FBgn0000577,FBgn0025800,FBgn0261269,FBgn0032821,FBgn0001965,FBgn0052056,FBgn0035719,FBgn0003430,FBgn0001168,FBgn0086677,FBgn0002973,FBgn0259174,FBgn0264075,FBgn0263289,FBgn0260934,FBgn0025638,FBgn0035993,FBgn0028500,FBgn0016047,FBgn0004102,FBgn0261456,FBgn0053193,FBgn0036376,FBgn0031762,FBgn0038874,FBg…
GO:0032989	cellular component morphogenesis	biological_process	1.4522e-53	3.3771e-51	478	3767	869	12231	FBgn0028968,FBgn0051961,FBgn0039056,FBgn0033260,FBgn0002441,FBgn0036480,FBgn0261963,FBgn0020238,FBgn0039709,FBgn0032891,FBgn0002526,FBgn0259228,FBgn0085436,FBgn0035851,FBgn0004009,FBgn0035761,FBgn0000635,FBgn0026371,FBgn0001233,FBgn0086357,FBgn0010280,FBgn0264560,FBgn0031668,FBgn0035574,FBgn0000709,FBgn0261854,FBgn0031784,FBgn0027515,FBgn0008635,FBgn0019949,FBgn0004795,FBgn0000099,FBgn0264006,FBg…
GO:0005737	cytoplasm	cellular_component	2.1737e-53	4.9373e-51	1138	3767	2630	12231	FBgn0263352,FBgn0259173,FBgn0035600,FBgn0039555,FBgn0003089,FBgn0029718,FBgn0026619,FBgn0013812,FBgn0035953,FBgn0019960,FBgn0263977,FBgn0036039,FBgn0004509,FBgn0036334,FBgn0032515,FBgn0040281,FBgn0051075,FBgn0000115,FBgn0033075,FBgn0086674,FBgn0030341,FBgn0042083,FBgn0004859,FBgn0039741,FBgn0029709,FBgn0029891,FBgn0026059,FBgn0015754,FBgn0036262,FBgn0019968,FBgn0027052,FBgn0015282,FBgn0033485,FBg…
GO:0043231	intracellular membrane-bounded organelle	cellular_component	2.6183e-53	5.8119e-51	1379	3767	3331	12231	FBgn0035357,FBgn0037008,FBgn0027558,FBgn0038065,FBgn0003261,FBgn0003525,FBgn0020307,FBgn0039120,FBgn0052190,FBgn0002891,FBgn0000097,FBgn0033088,FBgn0039229,FBgn0263987,FBgn0032487,FBgn0036660,FBgn0038474,FBgn0000018,FBgn0031912,FBgn0037875,FBgn0039861,FBgn0260860,FBgn0015024,FBgn0039348,FBgn0264326,FBgn0011763,FBgn0037540,FBgn0040318,FBgn0000546,FBgn0040273,FBgn0086916,FBgn0002183,FBgn0086687,FBg…
GO:0051179	localization	biological_process	2.4273e-51	5.2684e-49	911	3767	2011	12231	FBgn0031814,FBgn0024555,FBgn0031640,FBgn0033737,FBgn0008635,FBgn0035965,FBgn0264006,FBgn0002441,FBgn0020238,FBgn0034939,FBgn0029504,FBgn0039232,FBgn0036710,FBgn0086757,FBgn0016691,FBgn0003187,FBgn0266758,FBgn0033196,FBgn0029708,FBgn0053554,FBgn0001233,FBgn0087013,FBgn0264560,FBgn0000063,FBgn0032363,FBgn0259212,FBgn0010215,FBgn0030114,FBgn0024187,FBgn0052704,FBgn0041184,FBgn0030503,FBgn0031424,FBg…
GO:0009888	tissue development	biological_process	2.1524e-50	4.5701e-48	574	3767	1124	12231	FBgn0029067,FBgn0259978,FBgn0041096,FBgn0001320,FBgn0000711,FBgn0264695,FBgn0266711,FBgn0266465,FBgn0261285,FBgn0029831,FBgn0066365,FBgn0030054,FBgn0260632,FBgn0036059,FBgn0262736,FBgn0024244,FBgn0028371,FBgn0003507,FBgn0005198,FBgn0031030,FBgn0261854,FBgn0037236,FBgn0261064,FBgn0026415,FBgn0035574,FBgn0000083,FBgn0001180,FBgn0000099,FBgn0033260,FBgn0028968,FBgn0003079,FBgn0002526,FBgn0035802,FBg…
GO:0009887	organ morphogenesis	biological_process	3.941e-50	8.1897e-48	435	3767	783	12231	FBgn0031882,FBgn0261885,FBgn0011758,FBgn0000395,FBgn0010303,FBgn0260866,FBgn0046704,FBgn0004893,FBgn0003744,FBgn0022027,FBgn0027106,FBgn0261983,FBgn0001308,FBgn0000319,FBgn0003513,FBgn0003317,FBgn0259685,FBgn0003651,FBgn0011771,FBgn0041111,FBgn0013718,FBgn0000179,FBgn0003944,FBgn0028969,FBgn0000543,FBgn0033179,FBgn0000606,FBgn0003053,FBgn0000244,FBgn0010452,FBgn0000212,FBgn0001075,FBgn0000299,FBg…
GO:0060429	epithelium development	biological_process	8.5477e-50	1.7393e-47	526	3767	1007	12231	FBgn0010434,FBgn0037473,FBgn0005278,FBgn0259984,FBgn0052418,FBgn0000320,FBgn0028992,FBgn0014863,FBgn0003041,FBgn0000289,FBgn0037298,FBgn0004864,FBgn0041191,FBgn0002121,FBgn0004870,FBgn0003557,FBgn0011817,FBgn0002431,FBgn0027505,FBgn0023423,FBgn0020496,FBgn0262111,FBgn0004650,FBgn0034012,FBgn0000482,FBgn0019830,FBgn0036152,FBgn0036814,FBgn0031312,FBgn0002914,FBgn0002932,FBgn0015019,FBgn0052372,FBg…
GO:0030182	neuron differentiation	biological_process	1.3111e-49	2.5632e-47	436	3767	788	12231	FBgn0027335,FBgn0014133,FBgn0061469,FBgn0019947,FBgn0259210,FBgn0003042,FBgn0028734,FBgn0003654,FBgn0024326,FBgn0025740,FBgn0001259,FBgn0043884,FBgn0026143,FBgn0038722,FBgn0000723,FBgn0032929,FBgn0266671,FBgn0028500,FBgn0016047,FBgn0035993,FBgn0261456,FBgn0053193,FBgn0004102,FBgn0036376,FBgn0038874,FBgn0031762,FBgn0261698,FBgn0027596,FBgn0038498,FBgn0262519,FBgn0000163,FBgn0033987,FBgn0261984,FBg…
GO:0019222	regulation of metabolic process	biological_process	1.3122e-49	2.5632e-47	723	3767	1516	12231	FBgn0031972,FBgn0086677,FBgn0011836,FBgn0001965,FBgn0001168,FBgn0263289,FBgn0037874,FBgn0029133,FBgn0038286,FBgn0003334,FBgn0265089,FBgn0011837,FBgn0039337,FBgn0061469,FBgn0262559,FBgn0005695,FBgn0000251,FBgn0003042,FBgn0024326,FBgn0000490,FBgn0010750,FBgn0028509,FBgn0037359,FBgn0004396,FBgn0032378,FBgn0262699,FBgn0023441,FBgn0029512,FBgn0034503,FBgn0013263,FBgn0034646,FBgn0005655,FBgn0261984,FBg…
GO:0007165	signal transduction	biological_process	1.1375e-48	2.1785e-46	644	3767	1315	12231	FBgn0031030,FBgn0085387,FBgn0261854,FBgn0035574,FBgn0027498,FBgn0010407,FBgn0034240,FBgn0267431,FBgn0001180,FBgn0003079,FBgn0003867,FBgn0037734,FBgn0010441,FBgn0053513,FBgn0035802,FBgn0053958,FBgn0035711,FBgn0003720,FBgn0000635,FBgn0035761,FBgn0032782,FBgn0036368,FBgn0039402,FBgn0000711,FBgn0029067,FBgn0261119,FBgn0003249,FBgn0263111,FBgn0034722,FBgn0022023,FBgn0260632,FBgn0259785,FBgn0034310,FBg…
GO:0048518	positive regulation of biological process	biological_process	9.1787e-48	1.724e-45	526	3767	1019	12231	FBgn0035976,FBgn0037255,FBgn0265297,FBgn0024234,FBgn0250816,FBgn0267698,FBgn0264598,FBgn0027609,FBgn0003483,FBgn0025743,FBgn0034921,FBgn0011739,FBgn0037884,FBgn0022724,FBgn0086680,FBgn0011571,FBgn0034697,FBgn0031491,FBgn0038747,FBgn0002735,FBgn0000370,FBgn0034709,FBgn0002775,FBgn0024836,FBgn0030329,FBgn0030613,FBgn0262743,FBgn0011642,FBgn0011573,FBgn0035986,FBgn0011586,FBgn0261276,FBgn0038402,FBg…
GO:0023051	regulation of signaling	biological_process	4.077e-47	7.5133e-45	373	3767	651	12231	FBgn0264492,FBgn0024811,FBgn0015024,FBgn0259139,FBgn0029006,FBgn0034068,FBgn0261556,FBgn0262866,FBgn0040206,FBgn0051716,FBgn0032006,FBgn0000097,FBgn0261697,FBgn0002573,FBgn0016977,FBgn0036932,FBgn0017581,FBgn0012051,FBgn0261451,FBgn0004638,FBgn0032642,FBgn0031745,FBgn0038065,FBgn0037015,FBgn0262562,FBgn0026056,FBgn0037093,FBgn0001324,FBgn0029976,FBgn0038504,FBgn0020278,FBgn0015279,FBgn0032725,FBg…
GO:0010646	regulation of cell communication	biological_process	5.647e-47	1.0214e-44	377	3767	661	12231	FBgn0260940,FBgn0001332,FBgn0259168,FBgn0033483,FBgn0036846,FBgn0015589,FBgn0042085,FBgn0035590,FBgn0033902,FBgn0263706,FBgn0029123,FBgn0024941,FBgn0020493,FBgn0025802,FBgn0036373,FBgn0001079,FBgn0030941,FBgn0035853,FBgn0026181,FBgn0031633,FBgn0030310,FBgn0043900,FBgn0010379,FBgn0023023,FBgn0040505,FBgn0016917,FBgn0016794,FBgn0000547,FBgn0032217,FBgn0266717,FBgn0034975,FBgn0036740,FBgn0004177,FBg…
GO:0044238	primary metabolic process	biological_process	9.8624e-47	1.7514e-44	1695	3767	4361	12231	FBgn0036486,FBgn0039252,FBgn0027601,FBgn0000320,FBgn0037697,FBgn0037533,FBgn0037816,FBgn0040038,FBgn0003308,FBgn0035437,FBgn0259984,FBgn0013987,FBgn0023535,FBgn0034484,FBgn0039827,FBgn0004864,FBgn0041191,FBgn0004870,FBgn0004432,FBgn0004914,FBgn0031518,FBgn0011817,FBgn0035106,FBgn0040022,FBgn0002466,FBgn0004237,FBgn0034879,FBgn0037109,FBgn0039923,FBgn0020496,FBgn0023423,FBgn0031601,FBgn0037445,FBg…
GO:0060255	regulation of macromolecule metabolic process	biological_process	1.2681e-46	2.2117e-44	669	3767	1395	12231	FBgn0011296,FBgn0264075,FBgn0004837,FBgn0011737,FBgn0033052,FBgn0264815,FBgn0033749,FBgn0003430,FBgn0020309,FBgn0259174,FBgn0015371,FBgn0004510,FBgn0025800,FBgn0000577,FBgn0086613,FBgn0036934,FBgn0040071,FBgn0000257,FBgn0005411,FBgn0265276,FBgn0017550,FBgn0261823,FBgn0003330,FBgn0260749,FBgn0265523,FBgn0017430,FBgn0030600,FBgn0032929,FBgn0030366,FBgn0000137,FBgn0259791,FBgn0028734,FBgn0263396,FBg…
GO:0071704	organic substance metabolic process	biological_process	1.4452e-46	2.4764e-44	1815	3767	4736	12231	FBgn0037607,FBgn0036180,FBgn0261119,FBgn0000711,FBgn0266711,FBgn0266465,FBgn0000259,FBgn0034985,FBgn0030930,FBgn0039402,FBgn0033735,FBgn0033359,FBgn0029853,FBgn0017577,FBgn0260632,FBgn0051719,FBgn0034722,FBgn0051550,FBgn0050502,FBgn0000442,FBgn0034618,FBgn0022023,FBgn0026722,FBgn0037436,FBgn0029791,FBgn0032997,FBgn0030612,FBgn0034598,FBgn0032198,FBgn0032612,FBgn0028429,FBgn0037371,FBgn0032053,FBg…
GO:0000902	cell morphogenesis	biological_process	2.461e-46	4.1443e-44	417	3767	759	12231	FBgn0014133,FBgn0011202,FBgn0061469,FBgn0019947,FBgn0028734,FBgn0031781,FBgn0024326,FBgn0025740,FBgn0002789,FBgn0003330,FBgn0026143,FBgn0038722,FBgn0000723,FBgn0266671,FBgn0028500,FBgn0016047,FBgn0053193,FBgn0039924,FBgn0004102,FBgn0036376,FBgn0031762,FBgn0038874,FBgn0033685,FBgn0261698,FBgn0037028,FBgn0027596,FBgn0038498,FBgn0262519,FBgn0000163,FBgn0003371,FBgn0033987,FBgn0261984,FBgn0265102,FBg…
GO:0006996	organelle organization	biological_process	5.8107e-46	9.6192e-44	744	3767	1600	12231	FBgn0038747,FBgn0037135,FBgn0040080,FBgn0001108,FBgn0002775,FBgn0029903,FBgn0004374,FBgn0030863,FBgn0262743,FBgn0000317,FBgn0032848,FBgn0003502,FBgn0023216,FBgn0000405,FBgn0267795,FBgn0035766,FBgn0037280,FBgn0000404,FBgn0265297,FBgn0020255,FBgn0025391,FBgn0025724,FBgn0264598,FBgn0040066,FBgn0044419,FBgn0052380,FBgn0026179,FBgn0011739,FBgn0003483,FBgn0025743,FBgn0034921,FBgn0032340,FBgn0037770,FBg…
GO:0048583	regulation of response to stimulus	biological_process	4.5326e-44	7.3783e-42	429	3767	800	12231	FBgn0020251,FBgn0011202,FBgn0028734,FBgn0003042,FBgn0024326,FBgn0000251,FBgn0019947,FBgn0023510,FBgn0050440,FBgn0265082,FBgn0265523,FBgn0260749,FBgn0025740,FBgn0011785,FBgn0030600,FBgn0043884,FBgn0037359,FBgn0261456,FBgn0039924,FBgn0036141,FBgn0037376,FBgn0028500,FBgn0031762,FBgn0261573,FBgn0003612,FBgn0005638,FBgn0003371,FBgn0000163,FBgn0028427,FBgn0011836,FBgn0035719,FBgn0067783,FBgn0011692,FBg…
GO:0031323	regulation of cellular metabolic process	biological_process	9.6915e-44	1.5518e-41	656	3767	1382	12231	FBgn0032725,FBgn0031885,FBgn0033486,FBgn0000352,FBgn0038197,FBgn0263864,FBgn0015402,FBgn0028999,FBgn0028387,FBgn0035145,FBgn0039227,FBgn0265137,FBgn0036277,FBgn0053100,FBgn0027339,FBgn0036964,FBgn0038504,FBgn0042630,FBgn0025574,FBgn0028471,FBgn0002573,FBgn0016977,FBgn0004638,FBgn0012051,FBgn0003023,FBgn0250753,FBgn0003862,FBgn0004106,FBgn0033636,FBgn0264492,FBgn0004838,FBgn0259139,FBgn0029006,FBg…
GO:0030030	cell projection organization	biological_process	1.17e-43	1.8431e-41	380	3767	684	12231	FBgn0032859,FBgn0033791,FBgn0031903,FBgn0259483,FBgn0261788,FBgn0039338,FBgn0020887,FBgn0040324,FBgn0259938,FBgn0034577,FBgn0266450,FBgn0016797,FBgn0030276,FBgn0038170,FBgn0025741,FBgn0036891,FBgn0021760,FBgn0000565,FBgn0003204,FBgn0262111,FBgn0031255,FBgn0004108,FBgn0039380,FBgn0034012,FBgn0023169,FBgn0050441,FBgn0267002,FBgn0020391,FBgn0001250,FBgn0024179,FBgn0015797,FBgn0025725,FBgn0003041,FBg…
GO:0080090	regulation of primary metabolic process	biological_process	1.5905e-43	2.4658e-41	638	3767	1336	12231	FBgn0041100,FBgn0027053,FBgn0026441,FBgn0026401,FBgn0003415,FBgn0263930,FBgn0005561,FBgn0036819,FBgn0038016,FBgn0039286,FBgn0033897,FBgn0038499,FBgn0000063,FBgn0010417,FBgn0259212,FBgn0053554,FBgn0028984,FBgn0001233,FBgn0034858,FBgn0260446,FBgn0045759,FBgn0085436,FBgn0035851,FBgn0001179,FBgn0004009,FBgn0039938,FBgn0028987,FBgn0029504,FBgn0002441,FBgn0002906,FBgn0261963,FBgn0005649,FBgn0020238,FBg…
GO:0048666	neuron development	biological_process	2.6594e-43	4.0585e-41	378	3767	681	12231	FBgn0259174,FBgn0086677,FBgn0003430,FBgn0052056,FBgn0001965,FBgn0025638,FBgn0264075,FBgn0003334,FBgn0031955,FBgn0024963,FBgn0261269,FBgn0032821,FBgn0025800,FBgn0000577,FBgn0002565,FBgn0037481,FBgn0015371,FBgn0031114,FBgn0003042,FBgn0028734,FBgn0024326,FBgn0061469,FBgn0019947,FBgn0259210,FBgn0014133,FBgn0027335,FBgn0000723,FBgn0266671,FBgn0026143,FBgn0038722,FBgn0025740,FBgn0261698,FBgn0027596,FBg…
GO:0009966	regulation of signal transduction	biological_process	6.2556e-43	9.3998e-41	333	3767	577	12231	FBgn0011836,FBgn0027057,FBgn0001965,FBgn0011692,FBgn0035719,FBgn0020309,FBgn0028427,FBgn0002973,FBgn0259174,FBgn0086677,FBgn0028538,FBgn0265597,FBgn0039282,FBgn0260934,FBgn0264959,FBgn0025638,FBgn0000257,FBgn0021814,FBgn0026317,FBgn0036934,FBgn0000121,FBgn0002938,FBgn0039688,FBgn0032796,FBgn0020251,FBgn0019947,FBgn0023510,FBgn0024326,FBgn0260749,FBgn0265523,FBgn0025740,FBgn0011785,FBgn0265082,FBg…
GO:0065008	regulation of biological quality	biological_process	1.345e-42	1.9904e-40	490	3767	960	12231	FBgn0035539,FBgn0040230,FBgn0262125,FBgn0264442,FBgn0013953,FBgn0262114,FBgn0264975,FBgn0002577,FBgn0000547,FBgn0027356,FBgn0040505,FBgn0035101,FBgn0010379,FBgn0026181,FBgn0265356,FBgn0013997,FBgn0261086,FBgn0010389,FBgn0039927,FBgn0040297,FBgn0065108,FBgn0031437,FBgn0011693,FBgn0003312,FBgn0005630,FBgn0014857,FBgn0263598,FBgn0026378,FBgn0039140,FBgn0010350,FBgn0035533,FBgn0004177,FBgn0264691,FBg…
GO:0005634	nucleus	cellular_component	2.6157e-42	3.8131e-40	870	3767	1977	12231	FBgn0085451,FBgn0030468,FBgn0030625,FBgn0263995,FBgn0005771,FBgn0261565,FBgn0015268,FBgn0025802,FBgn0038274,FBgn0028685,FBgn0261385,FBgn0033316,FBgn0000662,FBgn0015828,FBgn0265003,FBgn0039218,FBgn0015799,FBgn0011606,FBgn0266557,FBgn0001235,FBgn0261617,FBgn0011276,FBgn0002921,FBgn0025682,FBgn0002622,FBgn0086895,FBgn0261109,FBgn0014343,FBgn0010350,FBgn0033380,FBgn0039274,FBgn0003460,FBgn0025874,FBg…
GO:0006464	cellular protein modification process	biological_process	3.7588e-42	5.3206e-40	520	3767	1039	12231	FBgn0037653,FBgn0005777,FBgn0037491,FBgn0034109,FBgn0020238,FBgn0000351,FBgn0026316,FBgn0019949,FBgn0027515,FBgn0011336,FBgn0263998,FBgn0037327,FBgn0035713,FBgn0041100,FBgn0027053,FBgn0023517,FBgn0034989,FBgn0020386,FBgn0003410,FBgn0034277,FBgn0015320,FBgn0039306,FBgn0260991,FBgn0267351,FBgn0035593,FBgn0032030,FBgn0035425,FBgn0039668,FBgn0259212,FBgn0010786,FBgn0000063,FBgn0028970,FBgn0034314,FBg…
GO:0036211	protein modification process	biological_process	3.7588e-42	5.3206e-40	520	3767	1039	12231	FBgn0029818,FBgn0032052,FBgn0025186,FBgn0026206,FBgn0029114,FBgn0031975,FBgn0033225,FBgn0035483,FBgn0035590,FBgn0260935,FBgn0001332,FBgn0029840,FBgn0031422,FBgn0261617,FBgn0003139,FBgn0039532,FBgn0259168,FBgn0000147,FBgn0027889,FBgn0004177,FBgn0000826,FBgn0026326,FBgn0028546,FBgn0026378,FBgn0030864,FBgn0035402,FBgn0035951,FBgn0010389,FBgn0038552,FBgn0037838,FBgn0031107,FBgn0040505,FBgn0000257,FBg…
GO:0048522	positive regulation of cellular process	biological_process	5.5839e-42	7.7912e-40	469	3767	911	12231	FBgn0053094,FBgn0261788,FBgn0002914,FBgn0259176,FBgn0014340,FBgn0002932,FBgn0041585,FBgn0052479,FBgn0259483,FBgn0260635,FBgn0032859,FBgn0041188,FBgn0039403,FBgn0023076,FBgn0038063,FBgn0010269,FBgn0034012,FBgn0002985,FBgn0000014,FBgn0020279,FBgn0002783,FBgn0037573,FBgn0020496,FBgn0023423,FBgn0026083,FBgn0010382,FBgn0022787,FBgn0003310,FBgn0015269,FBgn0267002,FBgn0040388,FBgn0086372,FBgn0085447,FBg…
GO:0008152	metabolic process	biological_process	8.7438e-42	1.2028e-39	1971	3767	5292	12231	FBgn0031252,FBgn0043900,FBgn0050342,FBgn0025334,FBgn0038552,FBgn0026372,FBgn0266917,FBgn0016794,FBgn0040505,FBgn0030864,FBgn0023178,FBgn0023489,FBgn0000182,FBgn0035402,FBgn0037723,FBgn0031549,FBgn0034141,FBgn0264442,FBgn0038037,FBgn0003460,FBgn0039084,FBgn0050104,FBgn0026326,FBgn0052351,FBgn0010350,FBgn0263598,FBgn0026378,FBgn0036824,FBgn0038211,FBgn0014343,FBgn0037138,FBgn0027889,FBgn0030518,FBg…
GO:0051641	cellular localization	biological_process	2.3114e-41	3.1355e-39	435	3767	830	12231	FBgn0260003,FBgn0041582,FBgn0037671,FBgn0000257,FBgn0021814,FBgn0005411,FBgn0035473,FBgn0259824,FBgn0266580,FBgn0033391,FBgn0035110,FBgn0002938,FBgn0004868,FBgn0004510,FBgn0261532,FBgn0004378,FBgn0036994,FBgn0039674,FBgn0030230,FBgn0028427,FBgn0011745,FBgn0029849,FBgn0067783,FBgn0011692,FBgn0002973,FBgn0028538,FBgn0032397,FBgn0030089,FBgn0266667,FBgn0031106,FBgn0026313,FBgn0026620,FBgn0260744,FBg…
GO:0035295	tube development	biological_process	9.9853e-41	1.336e-38	410	3767	772	12231	FBgn0030054,FBgn0041184,FBgn0003415,FBgn0029831,FBgn0263930,FBgn0264272,FBgn0261458,FBgn0266465,FBgn0266711,FBgn0261285,FBgn0000711,FBgn0041096,FBgn0259978,FBgn0027621,FBgn0000449,FBgn0029067,FBgn0039620,FBgn0260462,FBgn0267348,FBgn0036257,FBgn0003507,FBgn0020386,FBgn0024244,FBgn0001169,FBgn0262736,FBgn0000099,FBgn0021872,FBgn0000083,FBgn0261854,FBgn0045823,FBgn0261064,FBgn0026415,FBgn0035574,FBg…
GO:1902589	single-organism organelle organization	biological_process	1.2409e-40	1.6379e-38	549	3767	1124	12231	FBgn0000319,FBgn0001308,FBgn0045035,FBgn0031575,FBgn0027066,FBgn0004379,FBgn0004889,FBgn0013718,FBgn0029969,FBgn0037551,FBgn0011771,FBgn0003317,FBgn0004028,FBgn0000499,FBgn0261549,FBgn0003943,FBgn0262714,FBgn0000139,FBgn0263237,FBgn0034451,FBgn0024277,FBgn0264922,FBgn0000244,FBgn0004436,FBgn0020440,FBgn0037659,FBgn0261836,FBgn0039213,FBgn0030891,FBgn0036044,FBgn0030500,FBgn0035295,FBgn0034577,FBg…
GO:0007444	imaginal disc development	biological_process	1.2246e-39	1.5947e-37	356	3767	647	12231	FBgn0030054,FBgn0003415,FBgn0041184,FBgn0029831,FBgn0263930,FBgn0264272,FBgn0261458,FBgn0000711,FBgn0261285,FBgn0266711,FBgn0029067,FBgn0027621,FBgn0259978,FBgn0260462,FBgn0036257,FBgn0262736,FBgn0024244,FBgn0020386,FBgn0001169,FBgn0021872,FBgn0000099,FBgn0000083,FBgn0045823,FBgn0037236,FBgn0035574,FBgn0261064,FBgn0026415,FBgn0261270,FBgn0053554,FBgn0028984,FBgn0000635,FBgn0015615,FBgn0004009,FBg…
GO:0043170	macromolecule metabolic process	biological_process	3.6365e-39	4.6734e-37	1462	3767	3743	12231	FBgn0040022,FBgn0035106,FBgn0031518,FBgn0011817,FBgn0004914,FBgn0004432,FBgn0004870,FBgn0041191,FBgn0034484,FBgn0004864,FBgn0013987,FBgn0259984,FBgn0035437,FBgn0040038,FBgn0037816,FBgn0000320,FBgn0039252,FBgn0036486,FBgn0015019,FBgn0032229,FBgn0052238,FBgn0031995,FBgn0259483,FBgn0030719,FBgn0266450,FBgn0034577,FBgn0003742,FBgn0033050,FBgn0020261,FBgn0035397,FBgn0000382,FBgn0034012,FBgn0037445,FBg…
GO:0043412	macromolecule modification	biological_process	1.4071e-38	1.7848e-36	528	3767	1084	12231	FBgn0035437,FBgn0040038,FBgn0013987,FBgn0013269,FBgn0038515,FBgn0032054,FBgn0037816,FBgn0000320,FBgn0024179,FBgn0040022,FBgn0004864,FBgn0028476,FBgn0002431,FBgn0003557,FBgn0011817,FBgn0031518,FBgn0004432,FBgn0002121,FBgn0037573,FBgn0023423,FBgn0038603,FBgn0002466,FBgn0263974,FBgn0020391,FBgn0259483,FBgn0012058,FBgn0036973,FBgn0052479,FBgn0052238,FBgn0040780,FBgn0002932,FBgn0035397,FBgn0000382,FBg…
GO:0051128	regulation of cellular component organization	biological_process	2.7115e-38	3.3953e-36	333	3767	599	12231	FBgn0010379,FBgn0010389,FBgn0026181,FBgn0000547,FBgn0002577,FBgn0052654,FBgn0264785,FBgn0262125,FBgn0025463,FBgn0036740,FBgn0031549,FBgn0040230,FBgn0004177,FBgn0026326,FBgn0035533,FBgn0031437,FBgn0014857,FBgn0030082,FBgn0261397,FBgn0038369,FBgn0086359,FBgn0029840,FBgn0267350,FBgn0027948,FBgn0011606,FBgn0261617,FBgn0039532,FBgn0002921,FBgn0004449,FBgn0026479,FBgn0015589,FBgn0035590,FBgn0042085,FBg…
GO:0032990	cell part morphogenesis	biological_process	1.1024e-37	1.363e-35	338	3767	614	12231	FBgn0000017,FBgn0032725,FBgn0031196,FBgn0004397,FBgn0023172,FBgn0261509,FBgn0038197,FBgn0263864,FBgn0034487,FBgn0262593,FBgn0038742,FBgn0028999,FBgn0005536,FBgn0028387,FBgn0004926,FBgn0011020,FBgn0027339,FBgn0000504,FBgn0015279,FBgn0003950,FBgn0014395,FBgn0000097,FBgn0045980,FBgn0016977,FBgn0002573,FBgn0261451,FBgn0035357,FBgn0004360,FBgn0003862,FBgn0014163,FBgn0250753,FBgn0000546,FBgn0041171,FBg…
GO:0048858	cell projection morphogenesis	biological_process	2.9159e-37	3.56e-35	335	3767	609	12231	FBgn0032248,FBgn0035402,FBgn0040230,FBgn0025463,FBgn0262125,FBgn0264442,FBgn0014018,FBgn0034975,FBgn0043900,FBgn0026181,FBgn0261086,FBgn0264975,FBgn0024188,FBgn0040505,FBgn0010575,FBgn0003447,FBgn0003312,FBgn0014343,FBgn0005630,FBgn0039927,FBgn0265296,FBgn0038432,FBgn0000581,FBgn0261985,FBgn0015589,FBgn0029123,FBgn0033902,FBgn0029840,FBgn0004606,FBgn0036995,FBgn0266557,FBgn0027948,FBgn0004449,FBg…
GO:0010468	regulation of gene expression	biological_process	6.6307e-37	7.9954e-35	518	3767	1070	12231	FBgn0003870,FBgn0032988,FBgn0035518,FBgn0086683,FBgn0027950,FBgn0002733,FBgn0051390,FBgn0011277,FBgn0004656,FBgn0035769,FBgn0034051,FBgn0011289,FBgn0014388,FBgn0087039,FBgn0263772,FBgn0039169,FBgn0033633,FBgn0011666,FBgn0040227,FBgn0001087,FBgn0033029,FBgn0004419,FBgn0030505,FBgn0038100,FBgn0026083,FBgn0002783,FBgn0020279,FBgn0002985,FBgn0010220,FBgn0000014,FBgn0004862,FBgn0038063,FBgn0000568,FBg…
GO:1902578	single-organism localization	biological_process	7.1453e-37	8.5107e-35	703	3767	1565	12231	FBgn0031381,FBgn0029174,FBgn0003124,FBgn0086657,FBgn0260971,FBgn0037093,FBgn0259111,FBgn0250823,FBgn0010348,FBgn0028426,FBgn0036179,FBgn0000017,FBgn0038309,FBgn0004397,FBgn0003210,FBgn0035504,FBgn0025742,FBgn0262733,FBgn0000546,FBgn0024811,FBgn0015024,FBgn0260860,FBgn0037875,FBgn0033401,FBgn0259108,FBgn0004648,FBgn0031261,FBgn0265042,FBgn0039120,FBgn0004882,FBgn0020307,FBgn0038065,FBgn0027558,FBg…
GO:0050793	regulation of developmental process	biological_process	9.9604e-37	1.1721e-34	328	3767	595	12231	FBgn0020386,FBgn0003410,FBgn0039306,FBgn0005198,FBgn0041100,FBgn0027053,FBgn0036257,FBgn0003507,FBgn0023517,FBgn0264272,FBgn0261458,FBgn0005561,FBgn0259212,FBgn0263111,FBgn0041184,FBgn0260632,FBgn0066365,FBgn0263930,FBgn0003867,FBgn0002526,FBgn0003079,FBgn0034789,FBgn0002441,FBgn0261963,FBgn0000615,FBgn0001233,FBgn0004009,FBgn0035761,FBgn0000635,FBgn0261854,FBgn0031030,FBgn0019949,FBgn0027515,FBg…
GO:0051234	establishment of localization	biological_process	1.1006e-36	1.2797e-34	746	3767	1685	12231	FBgn0020307,FBgn0039120,FBgn0265042,FBgn0000097,FBgn0037766,FBgn0037015,FBgn0027558,FBgn0038065,FBgn0024811,FBgn0015024,FBgn0262733,FBgn0000546,FBgn0025742,FBgn0031261,FBgn0004648,FBgn0259108,FBgn0033401,FBgn0037875,FBgn0260860,FBgn0004397,FBgn0038309,FBgn0036179,FBgn0033901,FBgn0000017,FBgn0035504,FBgn0003210,FBgn0250823,FBgn0037093,FBgn0260971,FBgn0086657,FBgn0259111,FBgn0029174,FBgn0031381,FBg…
GO:0043167	ion binding	molecular_function	1.3038e-36	1.4982e-34	975	3767	2332	12231	FBgn0036368,FBgn0266465,FBgn0023536,FBgn0264695,FBgn0036897,FBgn0041096,FBgn0001320,FBgn0000442,FBgn0050502,FBgn0263111,FBgn0017577,FBgn0031992,FBgn0259785,FBgn0036096,FBgn0024244,FBgn0039492,FBgn0035144,FBgn0032763,FBgn0030945,FBgn0034728,FBgn0037436,FBgn0029791,FBgn0032001,FBgn0086358,FBgn0032157,FBgn0005624,FBgn0038376,FBgn0003507,FBgn0016983,FBgn0261854,FBgn0031030,FBgn0031784,FBgn0261064,FBg…
GO:0044422	organelle part	cellular_component	2.0312e-36	2.3068e-34	995	3767	2392	12231	FBgn0040283,FBgn0034527,FBgn0033247,FBgn0029718,FBgn0036386,FBgn0039555,FBgn0014870,FBgn0013756,FBgn0261268,FBgn0029094,FBgn0019960,FBgn0035983,FBgn0086690,FBgn0013812,FBgn0043550,FBgn0265574,FBgn0086532,FBgn0027548,FBgn0031703,FBgn0022764,FBgn0263197,FBgn0028982,FBgn0015600,FBgn0035600,FBgn0013717,FBgn0085444,FBgn0000667,FBgn0011661,FBgn0034231,FBgn0026059,FBgn0029906,FBgn0015754,FBgn0039741,FBg…
GO:0044428	nuclear part	cellular_component	8.595e-36	9.6491e-34	438	3767	872	12231	FBgn0004432,FBgn0261286,FBgn0014002,FBgn0038872,FBgn0035194,FBgn0033379,FBgn0035640,FBgn0040022,FBgn0031078,FBgn0038746,FBgn0051390,FBgn0027950,FBgn0051950,FBgn0039125,FBgn0032988,FBgn0036486,FBgn0086683,FBgn0020497,FBgn0262468,FBgn0013269,FBgn0052418,FBgn0037248,FBgn0263667,FBgn0011289,FBgn0033264,FBgn0015546,FBgn0003742,FBgn0024921,FBgn0039403,FBgn0003175,FBgn0014340,FBgn0036915,FBgn0002914,FBg…
GO:0051171	regulation of nitrogen compound metabolic process	biological_process	1.7793e-35	1.9748e-33	509	3767	1057	12231	FBgn0003507,FBgn0086358,FBgn0005624,FBgn0026441,FBgn0025360,FBgn0037436,FBgn0263930,FBgn0026401,FBgn0260632,FBgn0003415,FBgn0034722,FBgn0037607,FBgn0001320,FBgn0010417,FBgn0038499,FBgn0261119,FBgn0029067,FBgn0036819,FBgn0005561,FBgn0038016,FBgn0034985,FBgn0039286,FBgn0033897,FBgn0034858,FBgn0260446,FBgn0001179,FBgn0085436,FBgn0045759,FBgn0004009,FBgn0033400,FBgn0261560,FBgn0053554,FBgn0001233,FBg…
GO:0048729	tissue morphogenesis	biological_process	2.0016e-35	2.1966e-33	350	3767	655	12231	FBgn0020493,FBgn0032812,FBgn0030395,FBgn0036007,FBgn0004607,FBgn0020389,FBgn0001235,FBgn0261617,FBgn0266557,FBgn0039532,FBgn0003028,FBgn0263706,FBgn0262582,FBgn0042085,FBgn0003460,FBgn0028546,FBgn0010350,FBgn0035533,FBgn0010575,FBgn0003447,FBgn0014343,FBgn0003312,FBgn0005630,FBgn0015513,FBgn0024236,FBgn0004197,FBgn0043900,FBgn0016075,FBgn0026181,FBgn0013997,FBgn0010389,FBgn0264975,FBgn0002577,FBg…
GO:0048812	neuron projection morphogenesis	biological_process	2.348e-35	2.5481e-33	307	3767	552	12231	FBgn0000581,FBgn0038432,FBgn0265296,FBgn0039927,FBgn0003312,FBgn0014343,FBgn0005630,FBgn0010575,FBgn0003447,FBgn0040505,FBgn0264975,FBgn0024188,FBgn0026181,FBgn0261086,FBgn0043900,FBgn0264442,FBgn0014018,FBgn0034975,FBgn0040230,FBgn0025463,FBgn0262125,FBgn0032248,FBgn0035402,FBgn0243511,FBgn0020493,FBgn0000629,FBgn0030941,FBgn0004449,FBgn0266557,FBgn0027948,FBgn0004606,FBgn0029840,FBgn0033902,FBg…
GO:0022607	cellular component assembly	biological_process	2.5045e-35	2.688e-33	438	3767	875	12231	FBgn0053875,FBgn0032421,FBgn0036044,FBgn0003380,FBgn0052350,FBgn0039213,FBgn0263102,FBgn0001125,FBgn0000996,FBgn0263929,FBgn0026370,FBgn0020440,FBgn0000541,FBgn0003731,FBgn0264922,FBgn0024277,FBgn0030018,FBgn0011207,FBgn0034072,FBgn0262467,FBgn0000499,FBgn0003317,FBgn0015806,FBgn0004028,FBgn0011771,FBgn0000173,FBgn0002773,FBgn0259685,FBgn0013718,FBgn0000535,FBgn0032444,FBgn0041111,FBgn0003360,FBg…
GO:0031175	neuron projection development	biological_process	2.9518e-35	3.1338e-33	311	3767	562	12231	FBgn0040068,FBgn0036101,FBgn0000108,FBgn0032629,FBgn0004635,FBgn0000307,FBgn0041781,FBgn0052685,FBgn0000253,FBgn0010415,FBgn0266369,FBgn0011481,FBgn0026375,FBgn0025381,FBgn0027620,FBgn0011715,FBgn0004657,FBgn0029688,FBgn0004644,FBgn0085450,FBgn0040208,FBgn0000239,FBgn0261588,FBgn0024985,FBgn0264089,FBgn0001139,FBgn0010909,FBgn0016081,FBgn0053208,FBgn0011604,FBgn0011300,FBgn0039132,FBgn0028993,FBg…
GO:0090304	nucleic acid metabolic process	biological_process	3.7956e-35	3.9862e-33	702	3767	1578	12231	FBgn0263352,FBgn0030801,FBgn0022764,FBgn0001325,FBgn0038827,FBgn0025525,FBgn0028982,FBgn0037707,FBgn0033015,FBgn0085444,FBgn0013717,FBgn0030477,FBgn0036386,FBgn0051992,FBgn0000273,FBgn0029094,FBgn0014870,FBgn0013756,FBgn0033081,FBgn0265574,FBgn0004878,FBgn0027548,FBgn0016034,FBgn0263112,FBgn0034065,FBgn0032515,FBgn0004859,FBgn0003567,FBgn0026873,FBgn0037781,FBgn0028744,FBgn0023518,FBgn0005658,FBg…
GO:0006725	cellular aromatic compound metabolic process	biological_process	1.0193e-34	1.0591e-32	854	3767	2007	12231	FBgn0261109,FBgn0016054,FBgn0031973,FBgn0014343,FBgn0263598,FBgn0003460,FBgn0050104,FBgn0028406,FBgn0040339,FBgn0038146,FBgn0034975,FBgn0014018,FBgn0264442,FBgn0023489,FBgn0023178,FBgn0000153,FBgn0014037,FBgn0266917,FBgn0016794,FBgn0016917,FBgn0031252,FBgn0050342,FBgn0025334,FBgn0043900,FBgn0262739,FBgn0052230,FBgn0030468,FBgn0030625,FBgn0005771,FBgn0015268,FBgn0025802,FBgn0028685,FBgn0037911,FBg…
GO:0044085	cellular component biogenesis	biological_process	1.2681e-34	1.3038e-32	465	3767	949	12231	FBgn0027356,FBgn0000547,FBgn0264975,FBgn0052654,FBgn0262114,FBgn0011701,FBgn0010379,FBgn0262739,FBgn0265356,FBgn0013997,FBgn0026181,FBgn0025463,FBgn0262125,FBgn0038146,FBgn0037899,FBgn0034975,FBgn0010235,FBgn0027835,FBgn0026431,FBgn0035533,FBgn0004177,FBgn0030082,FBgn0037777,FBgn0001145,FBgn0261397,FBgn0003447,FBgn0031437,FBgn0022344,FBgn0014343,FBgn0011606,FBgn0027948,FBgn0261617,FBgn0039532,FBg…
GO:1901360	organic cyclic compound metabolic process	biological_process	1.814e-34	1.8455e-32	877	3767	2075	12231	FBgn0026401,FBgn0261266,FBgn0003415,FBgn0037737,FBgn0028434,FBgn0263930,FBgn0038016,FBgn0033897,FBgn0039286,FBgn0005561,FBgn0036819,FBgn0000449,FBgn0003074,FBgn0010786,FBgn0010417,FBgn0038499,FBgn0022942,FBgn0026441,FBgn0262619,FBgn0024909,FBgn0021872,FBgn0260944,FBgn0019949,FBgn0039858,FBgn0261872,FBgn0035162,FBgn0050122,FBgn0024555,FBgn0031016,FBgn0026086,FBgn0000109,FBgn0053554,FBgn0029977,FBg…
GO:0006928	movement of cell or subcellular component	biological_process	2.113e-34	2.1276e-32	325	3767	600	12231	FBgn0000490,FBgn0011202,FBgn0014133,FBgn0020251,FBgn0263396,FBgn0263076,FBgn0028734,FBgn0003654,FBgn0034009,FBgn0025740,FBgn0003545,FBgn0037726,FBgn0266671,FBgn0004381,FBgn0000723,FBgn0020620,FBgn0028500,FBgn0261456,FBgn0262699,FBgn0003499,FBgn0038498,FBgn0000163,FBgn0033987,FBgn0005638,FBgn0261563,FBgn0001150,FBgn0265102,FBgn0011692,FBgn0001965,FBgn0003430,FBgn0011745,FBgn0086677,FBgn0259174,FBg…
GO:0044446	intracellular organelle part	cellular_component	2.5199e-34	2.5114e-32	974	3767	2355	12231	FBgn0034141,FBgn0040339,FBgn0037715,FBgn0031549,FBgn0034975,FBgn0014037,FBgn0024188,FBgn0266917,FBgn0002772,FBgn0039680,FBgn0050342,FBgn0026372,FBgn0261109,FBgn0261397,FBgn0000147,FBgn0037138,FBgn0039140,FBgn0010350,FBgn0263598,FBgn0026378,FBgn0041775,FBgn0039274,FBgn0004177,FBgn0025874,FBgn0026326,FBgn0265003,FBgn0033902,FBgn0039218,FBgn0015799,FBgn0262526,FBgn0015589,FBgn0035483,FBgn0011606,FBg…
GO:0002009	morphogenesis of an epithelium	biological_process	3.4815e-34	3.4347e-32	341	3767	640	12231	FBgn0003447,FBgn0010575,FBgn0015513,FBgn0005630,FBgn0014343,FBgn0003312,FBgn0004197,FBgn0024236,FBgn0003460,FBgn0010350,FBgn0028546,FBgn0035533,FBgn0264785,FBgn0035539,FBgn0000633,FBgn0264442,FBgn0016075,FBgn0043900,FBgn0026181,FBgn0013997,FBgn0002577,FBgn0000547,FBgn0264975,FBgn0031118,FBgn0016917,FBgn0032812,FBgn0030395,FBgn0036007,FBgn0004607,FBgn0020493,FBgn0003028,FBgn0263706,FBgn0042085,FBg…
GO:0051649	establishment of localization in cell	biological_process	5.4058e-34	5.2798e-32	371	3767	715	12231	FBgn0004868,FBgn0002938,FBgn0261532,FBgn0004378,FBgn0260003,FBgn0041582,FBgn0021814,FBgn0000257,FBgn0037671,FBgn0033391,FBgn0035110,FBgn0035473,FBgn0005411,FBgn0266580,FBgn0259824,FBgn0031106,FBgn0026313,FBgn0026620,FBgn0028538,FBgn0032397,FBgn0266667,FBgn0030089,FBgn0033052,FBgn0036333,FBgn0260744,FBgn0011692,FBgn0067783,FBgn0029849,FBgn0011745,FBgn0039674,FBgn0030230,FBgn0053180,FBgn0003371,FBg…
GO:0006810	transport	biological_process	1.7226e-33	1.6659e-31	713	3767	1624	12231	FBgn0028969,FBgn0015622,FBgn0031634,FBgn0039212,FBgn0003317,FBgn0034479,FBgn0000535,FBgn0052250,FBgn0011771,FBgn0031304,FBgn0022027,FBgn0267390,FBgn0046704,FBgn0037299,FBgn0001308,FBgn0261983,FBgn0000319,FBgn0010300,FBgn0035505,FBgn0031450,FBgn0034394,FBgn0000250,FBgn0260743,FBgn0263220,FBgn0038223,FBgn0043792,FBgn0011211,FBgn0026597,FBgn0261836,FBgn0262515,FBgn0053508,FBgn0041150,FBgn0010497,FBg…
GO:0043168	anion binding	molecular_function	7.011e-33	6.7134e-31	500	3767	1053	12231	FBgn0003502,FBgn0000273,FBgn0260798,FBgn0000317,FBgn0040283,FBgn0086706,FBgn0086532,FBgn0038902,FBgn0013812,FBgn0037280,FBgn0003169,FBgn0036147,FBgn0038747,FBgn0003515,FBgn0030391,FBgn0031478,FBgn0011661,FBgn0001123,FBgn0004374,FBgn0004913,FBgn0011739,FBgn0003483,FBgn0029891,FBgn0025743,FBgn0026059,FBgn0024329,FBgn0019968,FBgn0037884,FBgn0039415,FBgn0015282,FBgn0051118,FBgn0022338,FBgn0004556,FBg…
GO:0040011	locomotion	biological_process	1.0715e-32	1.016e-30	310	3767	573	12231	FBgn0262738,FBgn0261588,FBgn0264089,FBgn0011225,FBgn0040208,FBgn0000239,FBgn0044323,FBgn0004644,FBgn0016920,FBgn0010909,FBgn0035632,FBgn0003388,FBgn0000578,FBgn0265434,FBgn0039132,FBgn0011300,FBgn0086906,FBgn0053208,FBgn0085443,FBgn0025879,FBgn0035491,FBgn0262742,FBgn0010583,FBgn0005659,FBgn0003888,FBgn0020224,FBgn0003254,FBgn0032629,FBgn0011648,FBgn0036101,FBgn0011205,FBgn0040068,FBgn0026192,FBg…
GO:0016070	RNA metabolic process	biological_process	1.1959e-32	1.1231e-30	625	3767	1390	12231	FBgn0015402,FBgn0038197,FBgn0000352,FBgn0033486,FBgn0051922,FBgn0262735,FBgn0034707,FBgn0036277,FBgn0027339,FBgn0036964,FBgn0031657,FBgn0039227,FBgn0035145,FBgn0028387,FBgn0261068,FBgn0028999,FBgn0038742,FBgn0015818,FBgn0003862,FBgn0012051,FBgn0004638,FBgn0002573,FBgn0016977,FBgn0028471,FBgn0038168,FBgn0027617,FBgn0042630,FBgn0023506,FBgn0262166,FBgn0027490,FBgn0261239,FBgn0261648,FBgn0004897,FBg…
GO:0046483	heterocycle metabolic process	biological_process	1.3282e-32	1.2355e-30	833	3767	1970	12231	FBgn0037554,FBgn0000615,FBgn0010356,FBgn0010280,FBgn0003720,FBgn0033400,FBgn0015615,FBgn0004057,FBgn0027378,FBgn0053958,FBgn0051472,FBgn0003079,FBgn0039867,FBgn0003867,FBgn0030170,FBgn0033260,FBgn0017457,FBgn0040020,FBgn0026679,FBgn0039757,FBgn0000579,FBgn0019957,FBgn0000099,FBgn0001180,FBgn0031505,FBgn0004795,FBgn0087035,FBgn0050016,FBgn0040347,FBgn0039260,FBgn0037371,FBgn0025360,FBgn0003507,FBg…
GO:0007423	sensory organ development	biological_process	1.6078e-32	1.4815e-30	268	3767	474	12231	FBgn0014906,FBgn0005278,FBgn0034051,FBgn0031149,FBgn0086683,FBgn0003870,FBgn0000320,FBgn0002733,FBgn0037092,FBgn0035106,FBgn0015797,FBgn0037298,FBgn0004864,FBgn0014388,FBgn0002121,FBgn0011666,FBgn0011817,FBgn0002431,FBgn0020496,FBgn0262111,FBgn0034135,FBgn0040388,FBgn0004237,FBgn0010382,FBgn0003310,FBgn0020391,FBgn0001202,FBgn0031903,FBgn0260635,FBgn0039234,FBgn0259176,FBgn0002932,FBgn0036372,FBg…
GO:0009791	post-embryonic development	biological_process	3.1263e-32	2.8537e-30	325	3767	612	12231	FBgn0263706,FBgn0001189,FBgn0262582,FBgn0042085,FBgn0003028,FBgn0015589,FBgn0001235,FBgn0266557,FBgn0039532,FBgn0020389,FBgn0036007,FBgn0004607,FBgn0029117,FBgn0020493,FBgn0262112,FBgn0035539,FBgn0262125,FBgn0264442,FBgn0264975,FBgn0002577,FBgn0000547,FBgn0016917,FBgn0031118,FBgn0043900,FBgn0026181,FBgn0010389,FBgn0024509,FBgn0004197,FBgn0010575,FBgn0003447,FBgn0014343,FBgn0003312,FBgn0005630,FBg…
GO:0007010	cytoskeleton organization	biological_process	3.4223e-32	3.095e-30	342	3767	654	12231	FBgn0015282,FBgn0031452,FBgn0025455,FBgn0019968,FBgn0015754,FBgn0025743,FBgn0265416,FBgn0026179,FBgn0264598,FBgn0025391,FBgn0020255,FBgn0016034,FBgn0038774,FBgn0086690,FBgn0020510,FBgn0265574,FBgn0035766,FBgn0267795,FBgn0000405,FBgn0013756,FBgn0262743,FBgn0032848,FBgn0000317,FBgn0000273,FBgn0003502,FBgn0015600,FBgn0029903,FBgn0000667,FBgn0011661,FBgn0001108,FBgn0263197,FBgn0038747,FBgn0040080,FBg…
GO:0060562	epithelial tube morphogenesis	biological_process	3.5853e-32	3.2126e-30	288	3767	523	12231	FBgn0004635,FBgn0026192,FBgn0021818,FBgn0011205,FBgn0020224,FBgn0003254,FBgn0260938,FBgn0011648,FBgn0011715,FBgn0004657,FBgn0003984,FBgn0038916,FBgn0035632,FBgn0026323,FBgn0025571,FBgn0010909,FBgn0001269,FBgn0038257,FBgn0004644,FBgn0011225,FBgn0010825,FBgn0010316,FBgn0025879,FBgn0003256,FBgn0032499,FBgn0015919,FBgn0016081,FBgn0039335,FBgn0265434,FBgn0265048,FBgn0004390,FBgn0011300,FBgn0001325,FBg…
GO:0032991	macromolecular complex	cellular_component	4.121e-32	3.659e-30	1046	3767	2591	12231	FBgn0040227,FBgn0035603,FBgn0001087,FBgn0033029,FBgn0004380,FBgn0004419,FBgn0031078,FBgn0002566,FBgn0035640,FBgn0053080,FBgn0035720,FBgn0022382,FBgn0011826,FBgn0259243,FBgn0034704,FBgn0032988,FBgn0027950,FBgn0051390,FBgn0030506,FBgn0028707,FBgn0037466,FBgn0020887,FBgn0039338,FBgn0014340,FBgn0020235,FBgn0002783,FBgn0020279,FBgn0030276,FBgn0031066,FBgn0019644,FBgn0050441,FBgn0267002,FBgn0023169,FBg…
GO:0006139	nucleobase-containing compound metabolic process	biological_process	5.0068e-32	4.4055e-30	798	3767	1877	12231	FBgn0011766,FBgn0031318,FBgn0036124,FBgn0036398,FBgn0015754,FBgn0024329,FBgn0024191,FBgn0026373,FBgn0027575,FBgn0011764,FBgn0025455,FBgn0034537,FBgn0025639,FBgn0032515,FBgn0038224,FBgn0034065,FBgn0052626,FBgn0022338,FBgn0263112,FBgn0016034,FBgn0020633,FBgn0260936,FBgn0034265,FBgn0042132,FBgn0005658,FBgn0023518,FBgn0037781,FBgn0028744,FBgn0026873,FBgn0003567,FBgn0004859,FBgn0014870,FBgn0013756,FBg…
GO:0016192	vesicle-mediated transport	biological_process	6.1001e-32	5.3196e-30	300	3767	553	12231	FBgn0025381,FBgn0010380,FBgn0041181,FBgn0000042,FBgn0044871,FBgn0265351,FBgn0003392,FBgn0035255,FBgn0032005,FBgn0053526,FBgn0035762,FBgn0026192,FBgn0011232,FBgn0041781,FBgn0020224,FBgn0000183,FBgn0016975,FBgn0032499,FBgn0015372,FBgn0265988,FBgn0031985,FBgn0260439,FBgn0039132,FBgn0015919,FBgn0039335,FBgn0085443,FBgn0035060,FBgn0004242,FBgn0266756,FBgn0004387,FBgn0011225,FBgn0266757,FBgn0034691,FBg…
GO:0035239	tube morphogenesis	biological_process	6.1921e-32	5.3521e-30	300	3767	553	12231	FBgn0011642,FBgn0000317,FBgn0261268,FBgn0000273,FBgn0260798,FBgn0003502,FBgn0003169,FBgn0001325,FBgn0038747,FBgn0036844,FBgn0015600,FBgn0025525,FBgn0030863,FBgn0038755,FBgn0001123,FBgn0011661,FBgn0010470,FBgn0004652,FBgn0032230,FBgn0011739,FBgn0011766,FBgn0001083,FBgn0261570,FBgn0010113,FBgn0024234,FBgn0267698,FBgn0026179,FBgn0016693,FBgn0011715,FBgn0003984,FBgn0004657,FBgn0266369,FBgn0038916,FBg…
GO:0044765	single-organism transport	biological_process	4.0993e-31	3.5121e-29	641	3767	1448	12231	FBgn0039335,FBgn0050035,FBgn0015919,FBgn0051229,FBgn0034136,FBgn0039844,FBgn0052758,FBgn0016975,FBgn0004644,FBgn0016041,FBgn0036240,FBgn0044323,FBgn0032938,FBgn0266757,FBgn0029789,FBgn0033028,FBgn0011225,FBgn0035632,FBgn0266756,FBgn0036984,FBgn0001301,FBgn0266369,FBgn0265351,FBgn0032005,FBgn0003392,FBgn0000042,FBgn0041181,FBgn0025381,FBgn0030844,FBgn0265998,FBgn0263278,FBgn0034497,FBgn0041781,FBg…
GO:0031326	regulation of cellular biosynthetic process	biological_process	5.9414e-31	5.046e-29	465	3767	976	12231	FBgn0035518,FBgn0032988,FBgn0003870,FBgn0051390,FBgn0000320,FBgn0002733,FBgn0027950,FBgn0011277,FBgn0011289,FBgn0034051,FBgn0037248,FBgn0035769,FBgn0004656,FBgn0001138,FBgn0001978,FBgn0263772,FBgn0087039,FBgn0041191,FBgn0014388,FBgn0004870,FBgn0038872,FBgn0011666,FBgn0004914,FBgn0000448,FBgn0035106,FBgn0040227,FBgn0033029,FBgn0030505,FBgn0015269,FBgn0022787,FBgn0026083,FBgn0010382,FBgn0038100,FBg…
GO:0033036	macromolecule localization	biological_process	7.0613e-31	5.9455e-29	338	3767	652	12231	FBgn0015320,FBgn0260991,FBgn0262736,FBgn0032136,FBgn0024833,FBgn0086358,FBgn0022942,FBgn0027338,FBgn0259212,FBgn0000259,FBgn0039402,FBgn0010215,FBgn0034310,FBgn0267727,FBgn0030503,FBgn0034939,FBgn0028968,FBgn0033260,FBgn0036449,FBgn0010441,FBgn0032782,FBgn0001197,FBgn0086757,FBgn0032699,FBgn0264560,FBgn0087013,FBgn0086357,FBgn0001233,FBgn0000615,FBgn0024555,FBgn0261854,FBgn0261064,FBgn0087035,FBg…
GO:0009889	regulation of biosynthetic process	biological_process	8.011e-31	6.6875e-29	465	3767	977	12231	FBgn0027592,FBgn0022740,FBgn0020224,FBgn0003254,FBgn0011648,FBgn0052133,FBgn0000307,FBgn0032475,FBgn0000283,FBgn0003732,FBgn0013751,FBgn0024222,FBgn0021818,FBgn0015240,FBgn0261238,FBgn0011481,FBgn0023509,FBgn0001222,FBgn0037475,FBgn0031145,FBgn0004514,FBgn0004170,FBgn0027620,FBgn0004618,FBgn0015524,FBgn0016070,FBgn0011715,FBgn0035916,FBgn0028926,FBgn0019650,FBgn0003687,FBgn0026428,FBgn0032321,FBg…
GO:0002165	instar larval or pupal development	biological_process	9.2577e-31	7.6627e-29	306	3767	574	12231	FBgn0052666,FBgn0031885,FBgn0000114,FBgn0024510,FBgn0023172,FBgn0000352,FBgn0003090,FBgn0001122,FBgn0010328,FBgn0263864,FBgn0038197,FBgn0015402,FBgn0031381,FBgn0038341,FBgn0005536,FBgn0030334,FBgn0028387,FBgn0039227,FBgn0001324,FBgn0053100,FBgn0015279,FBgn0030766,FBgn0000504,FBgn0085397,FBgn0003319,FBgn0039257,FBgn0082582,FBgn0020307,FBgn0016977,FBgn0261437,FBgn0031005,FBgn0004638,FBgn0030590,FBg…
GO:0019219	regulation of nucleobase-containing compound metabolic process	biological_process	1.5485e-30	1.2709e-28	455	3767	953	12231	FBgn0040305,FBgn0024371,FBgn0045035,FBgn0003513,FBgn0086675,FBgn0037760,FBgn0003575,FBgn0002922,FBgn0031450,FBgn0000395,FBgn0011758,FBgn0002552,FBgn0003165,FBgn0261885,FBgn0039904,FBgn0010303,FBgn0003944,FBgn0000179,FBgn0033846,FBgn0037792,FBgn0035849,FBgn0000606,FBgn0003053,FBgn0036134,FBgn0003317,FBgn0031711,FBgn0025674,FBgn0011723,FBgn0002521,FBgn0003651,FBgn0003360,FBgn0041111,FBgn0039600,FBg…
GO:0007049	cell cycle	biological_process	1.6119e-30	1.3119e-28	418	3767	857	12231	FBgn0035766,FBgn0265574,FBgn0011586,FBgn0000404,FBgn0033081,FBgn0003502,FBgn0262743,FBgn0032848,FBgn0023177,FBgn0013756,FBgn0033247,FBgn0000405,FBgn0040283,FBgn0034231,FBgn0011661,FBgn0030613,FBgn0015399,FBgn0030863,FBgn0004374,FBgn0015600,FBgn0022764,FBgn0040080,FBgn0038827,FBgn0263197,FBgn0001108,FBgn0019968,FBgn0031452,FBgn0025455,FBgn0015282,FBgn0265416,FBgn0011766,FBgn0003483,FBgn0011739,FBg…
GO:0000278	mitotic cell cycle	biological_process	2.0273e-30	1.6365e-28	315	3767	598	12231	FBgn0086356,FBgn0035194,FBgn0002044,FBgn0038872,FBgn0041191,FBgn0010621,FBgn0035640,FBgn0004419,FBgn0003041,FBgn0015546,FBgn0037473,FBgn0039403,FBgn0030500,FBgn0034958,FBgn0000382,FBgn0264291,FBgn0015019,FBgn0053094,FBgn0002914,FBgn0259483,FBgn0012058,FBgn0010382,FBgn0004237,FBgn0260639,FBgn0023169,FBgn0002787,FBgn0002466,FBgn0031601,FBgn0002783,FBgn0004855,FBgn0030276,FBgn0023423,FBgn0021760,FBg…
GO:0035220	wing disc development	biological_process	2.1814e-30	1.7464e-28	261	3767	468	12231	FBgn0001122,FBgn0000352,FBgn0003090,FBgn0015402,FBgn0038197,FBgn0052666,FBgn0023172,FBgn0000114,FBgn0053100,FBgn0003319,FBgn0085397,FBgn0030766,FBgn0030334,FBgn0005536,FBgn0028387,FBgn0004638,FBgn0031005,FBgn0261437,FBgn0038065,FBgn0020621,FBgn0082582,FBgn0039257,FBgn0020307,FBgn0016977,FBgn0265042,FBgn0261648,FBgn0262866,FBgn0010341,FBgn0045073,FBgn0004648,FBgn0051145,FBgn0000546,FBgn0040372,FBg…
GO:0009886	post-embryonic morphogenesis	biological_process	2.6427e-30	2.0985e-28	268	3767	485	12231	FBgn0003557,FBgn0011817,FBgn0002431,FBgn0002121,FBgn0004870,FBgn0004864,FBgn0086901,FBgn0000289,FBgn0033438,FBgn0028992,FBgn0000320,FBgn0003870,FBgn0038862,FBgn0004656,FBgn0263667,FBgn0010434,FBgn0034249,FBgn0016797,FBgn0030808,FBgn0020261,FBgn0003175,FBgn0052372,FBgn0259176,FBgn0002932,FBgn0260635,FBgn0031903,FBgn0001250,FBgn0036152,FBgn0010382,FBgn0003310,FBgn0040388,FBgn0030505,FBgn0034012,FBg…
GO:0044267	cellular protein metabolic process	biological_process	8.2115e-30	6.4679e-28	724	3767	1692	12231	FBgn0020660,FBgn0250820,FBgn0005198,FBgn0028429,FBgn0032053,FBgn0032198,FBgn0040011,FBgn0031384,FBgn0264848,FBgn0052672,FBgn0022023,FBgn0000442,FBgn0034722,FBgn0034237,FBgn0029853,FBgn0036368,FBgn0000259,FBgn0039402,FBgn0000711,FBgn0266465,FBgn0266711,FBgn0261119,FBgn0036897,FBgn0015625,FBgn0036180,FBgn0028691,FBgn0010198,FBgn0261560,FBgn0026371,FBgn0000557,FBgn0003079,FBgn0010441,FBgn0037734,FBg…
GO:0048569	post-embryonic organ development	biological_process	1.1094e-29	8.6684e-28	270	3767	493	12231	FBgn0000099,FBgn0035574,FBgn0261064,FBgn0045823,FBgn0003187,FBgn0015615,FBgn0000635,FBgn0004009,FBgn0028984,FBgn0035802,FBgn0002526,FBgn0003079,FBgn0263930,FBgn0029831,FBgn0003415,FBgn0041184,FBgn0000442,FBgn0029067,FBgn0259978,FBgn0027621,FBgn0000711,FBgn0266711,FBgn0261285,FBgn0264272,FBgn0003507,FBgn0036257,FBgn0027053,FBgn0262736,FBgn0024244,FBgn0020386,FBgn0001169,FBgn0020621,FBgn0031005,FBg…
GO:0048707	instar larval or pupal morphogenesis	biological_process	1.141e-29	8.8445e-28	262	3767	474	12231	FBgn0004652,FBgn0032230,FBgn0001083,FBgn0011766,FBgn0261570,FBgn0010113,FBgn0024234,FBgn0026179,FBgn0267698,FBgn0016693,FBgn0003502,FBgn0011642,FBgn0000273,FBgn0260798,FBgn0261268,FBgn0000317,FBgn0036844,FBgn0038747,FBgn0030863,FBgn0038755,FBgn0025525,FBgn0015600,FBgn0010470,FBgn0001123,FBgn0011661,FBgn0010316,FBgn0035850,FBgn0010825,FBgn0032499,FBgn0003256,FBgn0025879,FBgn0016081,FBgn0039335,FBg…
GO:0000166	nucleotide binding	molecular_function	1.2019e-29	9.1711e-28	503	3767	1087	12231	FBgn0085260,FBgn0001091,FBgn0262519,FBgn0003371,FBgn0032083,FBgn0034572,FBgn0030512,FBgn0035047,FBgn0261984,FBgn0259712,FBgn0038145,FBgn0261456,FBgn0262734,FBgn0250786,FBgn0030855,FBgn0032154,FBgn0030683,FBgn0023441,FBgn0265184,FBgn0261850,FBgn0017430,FBgn0000723,FBgn0004381,FBgn0037726,FBgn0028509,FBgn0003545,FBgn0030029,FBgn0004227,FBgn0039020,FBgn0027582,FBgn0014024,FBgn0263396,FBgn0263076,FBg…
GO:1901265	nucleoside phosphate binding	molecular_function	1.2019e-29	9.1711e-28	503	3767	1087	12231	FBgn0037707,FBgn0024285,FBgn0001123,FBgn0004374,FBgn0030801,FBgn0003515,FBgn0030391,FBgn0013812,FBgn0038902,FBgn0051116,FBgn0003169,FBgn0027548,FBgn0003502,FBgn0260798,FBgn0051992,FBgn0000273,FBgn0000317,FBgn0038269,FBgn0040283,FBgn0086706,FBgn0033244,FBgn0000115,FBgn0039925,FBgn0039877,FBgn0038344,FBgn0031824,FBgn0020633,FBgn0016693,FBgn0267698,FBgn0038745,FBgn0004556,FBgn0022338,FBgn0265297,FBg…
GO:0007552	metamorphosis	biological_process	2.8937e-29	2.1909e-27	272	3767	500	12231	FBgn0028427,FBgn0001965,FBgn0035719,FBgn0020309,FBgn0030870,FBgn0036919,FBgn0004837,FBgn0263289,FBgn0264959,FBgn0260934,FBgn0026317,FBgn0004395,FBgn0037671,FBgn0260003,FBgn0265276,FBgn0027581,FBgn0000577,FBgn0025800,FBgn0020251,FBgn0014133,FBgn0000490,FBgn0262559,FBgn0261823,FBgn0001259,FBgn0265523,FBgn0053196,FBgn0004102,FBgn0250786,FBgn0036141,FBgn0013263,FBgn0262699,FBgn0003371,FBgn0261563,FBg…
GO:0010467	gene expression	biological_process	3.0612e-29	2.2999e-27	741	3767	1746	12231	FBgn0029941,FBgn0001168,FBgn0011836,FBgn0001965,FBgn0038927,FBgn0015218,FBgn0036838,FBgn0005648,FBgn0036450,FBgn0039337,FBgn0035714,FBgn0011837,FBgn0265089,FBgn0035253,FBgn0003334,FBgn0029133,FBgn0265184,FBgn0261850,FBgn0004396,FBgn0037249,FBgn0037359,FBgn0010750,FBgn0000490,FBgn0003042,FBgn0263603,FBgn0262559,FBgn0053505,FBgn0005695,FBgn0000251,FBgn0005638,FBgn0008646,FBgn0261984,FBgn0262734,FBg…
GO:0007166	cell surface receptor signaling pathway	biological_process	3.1241e-29	2.3292e-27	302	3767	573	12231	FBgn0264492,FBgn0025936,FBgn0029006,FBgn0015024,FBgn0034068,FBgn0032006,FBgn0040206,FBgn0010341,FBgn0261697,FBgn0025574,FBgn0000097,FBgn0002174,FBgn0039120,FBgn0016977,FBgn0002573,FBgn0040849,FBgn0038065,FBgn0031745,FBgn0031005,FBgn0004638,FBgn0261451,FBgn0012051,FBgn0004360,FBgn0037015,FBgn0031381,FBgn0250823,FBgn0001324,FBgn0030766,FBgn0015279,FBgn0000017,FBgn0033901,FBgn0034180,FBgn0032725,FBg…
GO:0051239	regulation of multicellular organismal process	biological_process	3.2478e-29	2.4031e-27	304	3767	578	12231	FBgn0012051,FBgn0031005,FBgn0004638,FBgn0004367,FBgn0011217,FBgn0000097,FBgn0003525,FBgn0261648,FBgn0034314,FBgn0262866,FBgn0010341,FBgn0259108,FBgn0001624,FBgn0032006,FBgn0041171,FBgn0011763,FBgn0262733,FBgn0000546,FBgn0261014,FBgn0004838,FBgn0040372,FBgn0262127,FBgn0001122,FBgn0262593,FBgn0263864,FBgn0038197,FBgn0038980,FBgn0000017,FBgn0023172,FBgn0010348,FBgn0261278,FBgn0000504,FBgn0015279,FBg…
GO:0048477	oogenesis	biological_process	3.5737e-29	2.6244e-27	310	3767	593	12231	FBgn0001977,FBgn0002926,FBgn0259984,FBgn0000181,FBgn0037092,FBgn0000320,FBgn0003870,FBgn0259243,FBgn0016031,FBgn0003041,FBgn0000221,FBgn0033438,FBgn0015797,FBgn0000479,FBgn0027505,FBgn0261279,FBgn0002121,FBgn0004864,FBgn0014388,FBgn0000482,FBgn0004650,FBgn0002783,FBgn0021875,FBgn0003204,FBgn0021760,FBgn0037573,FBgn0023423,FBgn0030276,FBgn0001250,FBgn0010382,FBgn0003310,FBgn0259176,FBgn0002914,FBg…
GO:0007560	imaginal disc morphogenesis	biological_process	3.703e-29	2.6791e-27	255	3767	460	12231	FBgn0003175,FBgn0052372,FBgn0011715,FBgn0020261,FBgn0030808,FBgn0034249,FBgn0003984,FBgn0004657,FBgn0016797,FBgn0031903,FBgn0260635,FBgn0259176,FBgn0002932,FBgn0040388,FBgn0030505,FBgn0004635,FBgn0010382,FBgn0036152,FBgn0003310,FBgn0021818,FBgn0001250,FBgn0002783,FBgn0262111,FBgn0011205,FBgn0260938,FBgn0010399,FBgn0020224,FBgn0034012,FBgn0002985,FBgn0011648,FBgn0086901,FBgn0010825,FBgn0004864,FBg…
GO:0048563	post-embryonic organ morphogenesis	biological_process	3.703e-29	2.6791e-27	255	3767	460	12231	FBgn0003557,FBgn0011817,FBgn0032499,FBgn0002431,FBgn0003256,FBgn0002121,FBgn0004870,FBgn0025879,FBgn0004864,FBgn0010316,FBgn0010825,FBgn0086901,FBgn0011300,FBgn0004390,FBgn0265048,FBgn0265434,FBgn0000289,FBgn0039335,FBgn0016081,FBgn0033438,FBgn0015919,FBgn0028992,FBgn0010909,FBgn0025571,FBgn0026323,FBgn0000320,FBgn0003870,FBgn0038862,FBgn0035632,FBgn0011225,FBgn0004656,FBgn0263667,FBgn0004644,FBg…
GO:0010556	regulation of macromolecule biosynthetic process	biological_process	6.0401e-29	4.3378e-27	440	3767	926	12231	FBgn0037466,FBgn0259176,FBgn0036915,FBgn0039338,FBgn0014340,FBgn0002914,FBgn0033166,FBgn0031903,FBgn0266450,FBgn0016797,FBgn0023076,FBgn0041188,FBgn0259938,FBgn0028550,FBgn0038063,FBgn0000568,FBgn0004862,FBgn0000382,FBgn0010269,FBgn0002985,FBgn0034012,FBgn0000014,FBgn0037445,FBgn0002783,FBgn0020279,FBgn0037109,FBgn0020496,FBgn0038100,FBgn0026083,FBgn0010382,FBgn0030505,FBgn0033029,FBgn0040227,FBg…
GO:0051252	regulation of RNA metabolic process	biological_process	8.3927e-29	5.9833e-27	435	3767	914	12231	FBgn0004878,FBgn0011586,FBgn0000273,FBgn0029094,FBgn0013756,FBgn0014870,FBgn0023216,FBgn0030477,FBgn0033859,FBgn0024285,FBgn0002775,FBgn0033015,FBgn0085444,FBgn0013717,FBgn0028982,FBgn0025525,FBgn0000370,FBgn0001325,FBgn0002735,FBgn0022764,FBgn0054031,FBgn0263352,FBgn0005636,FBgn0024191,FBgn0086680,FBgn0011764,FBgn0022724,FBgn0034537,FBgn0025639,FBgn0025455,FBgn0011766,FBgn0011739,FBgn0003483,FBg…
GO:0022412	cellular process involved in reproduction in multicellular organism	biological_process	9.6754e-29	6.8478e-27	373	3767	754	12231	FBgn0003416,FBgn0000543,FBgn0033846,FBgn0259685,FBgn0011723,FBgn0031304,FBgn0011771,FBgn0003317,FBgn0015806,FBgn0045035,FBgn0005390,FBgn0010300,FBgn0000319,FBgn0001308,FBgn0030753,FBgn0267390,FBgn0024371,FBgn0022027,FBgn0029093,FBgn0003165,FBgn0266521,FBgn0025373,FBgn0010303,FBgn0017418,FBgn0000250,FBgn0031450,FBgn0263929,FBgn0037146,FBgn0000541,FBgn0003731,FBgn0003118,FBgn0026370,FBgn0263102,FBg…
GO:2000112	regulation of cellular macromolecule biosynthetic process	biological_process	9.7487e-29	6.85e-27	439	3767	925	12231	FBgn0001168,FBgn0033749,FBgn0003430,FBgn0011836,FBgn0020309,FBgn0001965,FBgn0011296,FBgn0264075,FBgn0004837,FBgn0033052,FBgn0011837,FBgn0040071,FBgn0265089,FBgn0265276,FBgn0003334,FBgn0039337,FBgn0015371,FBgn0004510,FBgn0000577,FBgn0025800,FBgn0086613,FBgn0010750,FBgn0030366,FBgn0000137,FBgn0000490,FBgn0003042,FBgn0028734,FBgn0263396,FBgn0005695,FBgn0000251,FBgn0017550,FBgn0003330,FBgn0261823,FBg…
GO:0000904	cell morphogenesis involved in differentiation	biological_process	1.3317e-28	9.2904e-27	273	3767	506	12231	FBgn0243511,FBgn0020493,FBgn0000629,FBgn0030941,FBgn0004449,FBgn0266557,FBgn0027948,FBgn0004606,FBgn0029840,FBgn0029123,FBgn0015589,FBgn0261985,FBgn0000581,FBgn0014343,FBgn0003312,FBgn0005630,FBgn0010575,FBgn0016917,FBgn0040505,FBgn0264975,FBgn0002577,FBgn0026181,FBgn0043900,FBgn0014018,FBgn0264442,FBgn0034975,FBgn0262125,FBgn0025463,FBgn0036740,FBgn0032248,FBgn0032821,FBgn0261269,FBgn0000577,FBg…
GO:2000026	regulation of multicellular organismal development	biological_process	1.8378e-28	1.273e-26	234	3767	414	12231	FBgn0261854,FBgn0037671,FBgn0025800,FBgn0036985,FBgn0037481,FBgn0015371,FBgn0261963,FBgn0002441,FBgn0002973,FBgn0259174,FBgn0034789,FBgn0003079,FBgn0003430,FBgn0002526,FBgn0004837,FBgn0032956,FBgn0000635,FBgn0264959,FBgn0260934,FBgn0263289,FBgn0004009,FBgn0259209,FBgn0000615,FBgn0000394,FBgn0264075,FBgn0259212,FBgn0261456,FBgn0053193,FBgn0005561,FBgn0004102,FBgn0034646,FBgn0264272,FBgn0263930,FBg…
GO:0003006	developmental process involved in reproduction	biological_process	2.1963e-28	1.5107e-26	388	3767	795	12231	FBgn0085443,FBgn0016081,FBgn0265434,FBgn0000578,FBgn0031985,FBgn0261786,FBgn0010316,FBgn0034083,FBgn0015381,FBgn0004924,FBgn0032499,FBgn0005322,FBgn0259937,FBgn0004644,FBgn0266757,FBgn0036574,FBgn0022959,FBgn0002576,FBgn0011225,FBgn0010770,FBgn0264089,FBgn0001139,FBgn0003388,FBgn0035632,FBgn0010909,FBgn0040294,FBgn0004242,FBgn0262081,FBgn0003392,FBgn0001301,FBgn0004170,FBgn0023509,FBgn0000042,FBg…
GO:0007292	female gamete generation	biological_process	2.9318e-28	2.0025e-26	311	3767	601	12231	FBgn0263930,FBgn0004649,FBgn0267727,FBgn0261266,FBgn0041184,FBgn0004811,FBgn0041096,FBgn0032363,FBgn0000259,FBgn0261458,FBgn0033897,FBgn0000711,FBgn0264695,FBgn0010215,FBgn0261285,FBgn0005198,FBgn0041100,FBgn0027053,FBgn0036059,FBgn0032409,FBgn0026722,FBgn0020386,FBgn0004795,FBgn0031030,FBgn0261854,FBgn0261064,FBgn0004009,FBgn0003187,FBgn0001233,FBgn0260006,FBgn0000615,FBgn0020238,FBgn0039709,FBg…
GO:0044444	cytoplasmic part	cellular_component	3.6323e-28	2.4636e-26	814	3767	1966	12231	FBgn0003308,FBgn0027779,FBgn0038515,FBgn0266669,FBgn0036928,FBgn0032054,FBgn0004169,FBgn0033480,FBgn0013811,FBgn0000181,FBgn0027569,FBgn0025725,FBgn0015797,FBgn0036813,FBgn0024179,FBgn0028992,FBgn0038810,FBgn0014863,FBgn0003041,FBgn0023535,FBgn0261279,FBgn0027505,FBgn0086356,FBgn0029830,FBgn0004432,FBgn0082585,FBgn0002121,FBgn0037573,FBgn0021760,FBgn0000482,FBgn0085453,FBgn0031534,FBgn0260639,FBg…
GO:1901576	organic substance biosynthetic process	biological_process	4.1011e-28	2.7624e-26	796	3767	1915	12231	FBgn0261549,FBgn0263593,FBgn0013799,FBgn0262527,FBgn0011291,FBgn0019972,FBgn0000139,FBgn0263237,FBgn0045852,FBgn0263102,FBgn0011211,FBgn0027535,FBgn0001125,FBgn0024288,FBgn0050290,FBgn0261793,FBgn0039066,FBgn0005612,FBgn0001321,FBgn0026259,FBgn0030891,FBgn0024371,FBgn0260444,FBgn0045035,FBgn0010300,FBgn0030407,FBgn0032393,FBgn0002524,FBgn0003513,FBgn0003575,FBgn0000250,FBgn0031450,FBgn0038151,FBg…
GO:0008104	protein localization	biological_process	5.1291e-28	3.4312e-26	270	3767	502	12231	FBgn0011708,FBgn0000244,FBgn0027287,FBgn0264922,FBgn0035233,FBgn0005586,FBgn0034072,FBgn0024889,FBgn0000119,FBgn0000499,FBgn0037020,FBgn0035995,FBgn0052350,FBgn0028582,FBgn0020440,FBgn0040079,FBgn0027363,FBgn0031450,FBgn0000250,FBgn0031882,FBgn0022027,FBgn0267390,FBgn0261983,FBgn0000319,FBgn0001308,FBgn0015298,FBgn0027868,FBgn0259152,FBgn0037339,FBgn0259685,FBgn0028969,FBgn0001087,FBgn0015797,FBg…
GO:0009058	biosynthetic process	biological_process	5.3039e-28	3.524e-26	813	3767	1965	12231	FBgn0026323,FBgn0015075,FBgn0031115,FBgn0026741,FBgn0029176,FBgn0029800,FBgn0003388,FBgn0031988,FBgn0001139,FBgn0262738,FBgn0086710,FBgn0036974,FBgn0002576,FBgn0012034,FBgn0086368,FBgn0032321,FBgn0002905,FBgn0000447,FBgn0015381,FBgn0034878,FBgn0010825,FBgn0023091,FBgn0005659,FBgn0265048,FBgn0011604,FBgn0019936,FBgn0004390,FBgn0029711,FBgn0033668,FBgn0053526,FBgn0034649,FBgn0021818,FBgn0024222,FBg…
GO:0034641	cellular nitrogen compound metabolic process	biological_process	7.1615e-28	4.7261e-26	932	3767	2311	12231	FBgn0011586,FBgn0030789,FBgn0038269,FBgn0023216,FBgn0003502,FBgn0086706,FBgn0033859,FBgn0004856,FBgn0024285,FBgn0002775,FBgn0000370,FBgn0002735,FBgn0037135,FBgn0054031,FBgn0005636,FBgn0032016,FBgn0086680,FBgn0011571,FBgn0039768,FBgn0022724,FBgn0034921,FBgn0003483,FBgn0011739,FBgn0004913,FBgn0264954,FBgn0003638,FBgn0031266,FBgn0031824,FBgn0038344,FBgn0044419,FBgn0014143,FBgn0052380,FBgn0004401,FBg…
GO:1901362	organic cyclic compound biosynthetic process	biological_process	8.1841e-28	5.3647e-26	529	3767	1173	12231	FBgn0027493,FBgn0002567,FBgn0004606,FBgn0029123,FBgn0262582,FBgn0042085,FBgn0003028,FBgn0035149,FBgn0020493,FBgn0036373,FBgn0000629,FBgn0001079,FBgn0004607,FBgn0263131,FBgn0010422,FBgn0037751,FBgn0016756,FBgn0000567,FBgn0023023,FBgn0011701,FBgn0038578,FBgn0026573,FBgn0003044,FBgn0030738,FBgn0025463,FBgn0001296,FBgn0035677,FBgn0028789,FBgn0032248,FBgn0038516,FBgn0250910,FBgn0030082,FBgn0010575,FBg…
GO:0009790	embryo development	biological_process	9.9563e-28	6.4829e-26	287	3767	545	12231	FBgn0001321,FBgn0003118,FBgn0003731,FBgn0263102,FBgn0039907,FBgn0027535,FBgn0030018,FBgn0264922,FBgn0000299,FBgn0013799,FBgn0261524,FBgn0000499,FBgn0020392,FBgn0034072,FBgn0043903,FBgn0000173,FBgn0259685,FBgn0003651,FBgn0011723,FBgn0041111,FBgn0003317,FBgn0000606,FBgn0003053,FBgn0003944,FBgn0000543,FBgn0004889,FBgn0003165,FBgn0002552,FBgn0010303,FBgn0027066,FBgn0031882,FBgn0003292,FBgn0005390,FBg…
GO:0044249	cellular biosynthetic process	biological_process	1.7766e-27	1.1492e-25	785	3767	1891	12231	FBgn0027620,FBgn0034729,FBgn0037529,FBgn0016070,FBgn0015524,FBgn0034258,FBgn0011481,FBgn0000559,FBgn0031145,FBgn0003687,FBgn0029095,FBgn0035916,FBgn0028926,FBgn0023512,FBgn0020224,FBgn0022740,FBgn0038035,FBgn0052133,FBgn0032643,FBgn0039635,FBgn0002641,FBgn0011205,FBgn0027592,FBgn0053526,FBgn0034649,FBgn0021818,FBgn0024222,FBgn0042712,FBgn0265048,FBgn0019936,FBgn0004390,FBgn0011604,FBgn0029711,FBg…
GO:0036094	small molecule binding	molecular_function	1.8204e-27	1.1697e-25	526	3767	1168	12231	FBgn0036663,FBgn0029783,FBgn0028686,FBgn0001308,FBgn0030407,FBgn0003744,FBgn0267390,FBgn0264001,FBgn0037551,FBgn0003317,FBgn0000721,FBgn0015623,FBgn0023507,FBgn0053531,FBgn0027841,FBgn0011638,FBgn0004379,FBgn0020385,FBgn0263237,FBgn0035811,FBgn0035890,FBgn0033463,FBgn0010246,FBgn0261524,FBgn0022709,FBgn0261550,FBgn0040299,FBgn0026259,FBgn0265045,FBgn0259923,FBgn0261439,FBgn0259680,FBgn0030592,FBg…
GO:0018130	heterocycle biosynthetic process	biological_process	2.2007e-27	1.4048e-25	515	3767	1139	12231	FBgn0000099,FBgn0040020,FBgn0004795,FBgn0001180,FBgn0087035,FBgn0003720,FBgn0010280,FBgn0010356,FBgn0037554,FBgn0033400,FBgn0003867,FBgn0003079,FBgn0051472,FBgn0053958,FBgn0027378,FBgn0033260,FBgn0051719,FBgn0034722,FBgn0260632,FBgn0036368,FBgn0034985,FBgn0023536,FBgn0261285,FBgn0029067,FBgn0037607,FBgn0001320,FBgn0025360,FBgn0086358,FBgn0005624,FBgn0003507,FBgn0003277,FBgn0037436,FBgn0012051,FBg…
GO:0043234	protein complex	cellular_component	4.9241e-27	3.123e-25	853	3767	2092	12231	FBgn0033842,FBgn0000629,FBgn0001079,FBgn0039069,FBgn0030365,FBgn0031769,FBgn0020493,FBgn0011327,FBgn0262647,FBgn0031455,FBgn0003520,FBgn0035149,FBgn0010660,FBgn0026479,FBgn0024941,FBgn0262473,FBgn0042085,FBgn0260940,FBgn0014029,FBgn0005616,FBgn0053862,FBgn0027948,FBgn0024814,FBgn0031437,FBgn0003447,FBgn0015621,FBgn0061200,FBgn0014857,FBgn0024509,FBgn0038303,FBgn0261383,FBgn0026141,FBgn0026431,FBg…
GO:0044702	single organism reproductive process	biological_process	7.3228e-27	4.6143e-25	417	3767	882	12231	FBgn0036715,FBgn0003124,FBgn0015789,FBgn0002878,FBgn0038341,FBgn0039632,FBgn0005536,FBgn0250823,FBgn0039227,FBgn0028426,FBgn0020278,FBgn0000504,FBgn0015279,FBgn0262735,FBgn0003950,FBgn0000017,FBgn0000533,FBgn0000114,FBgn0263782,FBgn0023172,FBgn0040207,FBgn0000352,FBgn0262127,FBgn0263864,FBgn0262733,FBgn0000546,FBgn0004106,FBgn0086916,FBgn0264492,FBgn0011763,FBgn0004838,FBgn0029006,FBgn0259139,FBg…
GO:0048667	cell morphogenesis involved in neuron differentiation	biological_process	9.0858e-27	5.6885e-25	251	3767	463	12231	FBgn0000099,FBgn0015371,FBgn0264006,FBgn0004795,FBgn0002565,FBgn0025800,FBgn0000577,FBgn0261269,FBgn0032821,FBgn0035574,FBgn0003334,FBgn0010280,FBgn0264075,FBgn0035851,FBgn0085436,FBgn0000635,FBgn0001965,FBgn0002526,FBgn0003430,FBgn0086677,FBgn0259174,FBgn0020238,FBgn0002441,FBgn0261963,FBgn0000163,FBgn0262519,FBgn0038498,FBgn0033987,FBgn0033413,FBgn0010238,FBgn0261984,FBgn0001150,FBgn0263930,FBg…
GO:0001654	eye development	biological_process	9.6554e-27	6.0067e-25	209	3767	364	12231	FBgn0261648,FBgn0001332,FBgn0004449,FBgn0259108,FBgn0039532,FBgn0261617,FBgn0262866,FBgn0001235,FBgn0015589,FBgn0264492,FBgn0017590,FBgn0262582,FBgn0261014,FBgn0265174,FBgn0031745,FBgn0031005,FBgn0004638,FBgn0261437,FBgn0000662,FBgn0016756,FBgn0005771,FBgn0029818,FBgn0011217,FBgn0000097,FBgn0002573,FBgn0016977,FBgn0026181,FBgn0013726,FBgn0010348,FBgn0001324,FBgn0040505,FBgn0016917,FBgn0016794,FBg…
GO:0048749	compound eye development	biological_process	1.0314e-26	6.376e-25	202	3767	348	12231	FBgn0001324,FBgn0013726,FBgn0026181,FBgn0010348,FBgn0027356,FBgn0040505,FBgn0016917,FBgn0016794,FBgn0023489,FBgn0250823,FBgn0005536,FBgn0004177,FBgn0262127,FBgn0003460,FBgn0003090,FBgn0263864,FBgn0038197,FBgn0014343,FBgn0005630,FBgn0000017,FBgn0004197,FBgn0261397,FBgn0001332,FBgn0261648,FBgn0261617,FBgn0262866,FBgn0001235,FBgn0004449,FBgn0259108,FBgn0039532,FBgn0264492,FBgn0017590,FBgn0015589,FBg…
GO:0032553	ribonucleotide binding	molecular_function	1.7909e-26	1.1001e-24	386	3767	804	12231	FBgn0026059,FBgn0024329,FBgn0025743,FBgn0004913,FBgn0003483,FBgn0029891,FBgn0011739,FBgn0051118,FBgn0015282,FBgn0019968,FBgn0262617,FBgn0020255,FBgn0004556,FBgn0022338,FBgn0267698,FBgn0038745,FBgn0033244,FBgn0000115,FBgn0039925,FBgn0038344,FBgn0039877,FBgn0020633,FBgn0016693,FBgn0040283,FBgn0086706,FBgn0003502,FBgn0000273,FBgn0260798,FBgn0000317,FBgn0038902,FBgn0013812,FBgn0003169,FBgn0003515,FBg…
GO:0006793	phosphorus metabolic process	biological_process	2.4897e-26	1.5198e-24	429	3767	918	12231	FBgn0037816,FBgn0001258,FBgn0000320,FBgn0027601,FBgn0032054,FBgn0259243,FBgn0267385,FBgn0038271,FBgn0034997,FBgn0013987,FBgn0022382,FBgn0011826,FBgn0033844,FBgn0035437,FBgn0025335,FBgn0003308,FBgn0266375,FBgn0000479,FBgn0031518,FBgn0011817,FBgn0035945,FBgn0002121,FBgn0004864,FBgn0030035,FBgn0024179,FBgn0050410,FBgn0020391,FBgn0010382,FBgn0015269,FBgn0023169,FBgn0002466,FBgn0036369,FBgn0038603,FBg…
GO:0010648	negative regulation of cell communication	biological_process	2.5088e-26	1.522e-24	157	3767	249	12231	FBgn0264493,FBgn0026597,FBgn0027363,FBgn0040079,FBgn0003731,FBgn0000541,FBgn0003118,FBgn0020440,FBgn0039055,FBgn0001075,FBgn0027575,FBgn0261570,FBgn0003969,FBgn0263593,FBgn0000499,FBgn0003317,FBgn0259685,FBgn0024836,FBgn0015399,FBgn0003416,FBgn0036844,FBgn0022764,FBgn0003053,FBgn0021796,FBgn0033081,FBgn0031450,FBgn0003165,FBgn0022027,FBgn0259927,FBgn0031044,FBgn0261983,FBgn0029094,FBgn0260798,FBg…
GO:0007281	germ cell development	biological_process	2.8728e-26	1.732e-24	340	3767	687	12231	FBgn0011771,FBgn0259685,FBgn0031304,FBgn0015806,FBgn0003317,FBgn0033846,FBgn0000543,FBgn0003416,FBgn0010303,FBgn0266521,FBgn0029093,FBgn0003165,FBgn0031450,FBgn0000250,FBgn0017418,FBgn0001308,FBgn0000319,FBgn0010300,FBgn0045035,FBgn0005390,FBgn0022027,FBgn0267390,FBgn0024371,FBgn0030753,FBgn0003118,FBgn0026370,FBgn0037146,FBgn0003731,FBgn0263929,FBgn0000996,FBgn0026597,FBgn0011211,FBgn0261836,FBg…
GO:0017076	purine nucleotide binding	molecular_function	3.2766e-26	1.9633e-24	386	3767	806	12231	FBgn0013435,FBgn0011211,FBgn0039213,FBgn0020440,FBgn0026370,FBgn0262124,FBgn0003731,FBgn0260399,FBgn0026713,FBgn0027587,FBgn0259923,FBgn0265045,FBgn0259680,FBgn0038816,FBgn0033661,FBgn0026259,FBgn0022709,FBgn0020306,FBgn0005586,FBgn0040299,FBgn0010246,FBgn0261524,FBgn0000212,FBgn0036888,FBgn0263237,FBgn0030018,FBgn0019990,FBgn0020385,FBgn0013762,FBgn0027602,FBgn0004379,FBgn0015806,FBgn0003317,FBg…
GO:0007276	gamete generation	biological_process	4.3691e-26	2.602e-24	391	3767	820	12231	FBgn0021814,FBgn0265089,FBgn0259824,FBgn0003334,FBgn0025815,FBgn0261004,FBgn0004510,FBgn0053558,FBgn0033749,FBgn0024189,FBgn0026620,FBgn0264075,FBgn0032956,FBgn0263289,FBgn0260934,FBgn0034646,FBgn0086908,FBgn0261456,FBgn0250786,FBgn0020620,FBgn0013263,FBgn0260012,FBgn0005638,FBgn0262519,FBgn0000163,FBgn0003371,FBgn0005655,FBgn0011202,FBgn0000490,FBgn0263396,FBgn0028734,FBgn0003654,FBgn0005695,FBg…
GO:0019438	aromatic compound biosynthetic process	biological_process	6.0948e-26	3.6077e-24	509	3767	1136	12231	FBgn0011766,FBgn0011739,FBgn0003483,FBgn0036398,FBgn0264954,FBgn0036124,FBgn0015754,FBgn0005636,FBgn0024191,FBgn0086680,FBgn0026373,FBgn0011571,FBgn0022724,FBgn0011764,FBgn0027575,FBgn0034537,FBgn0025639,FBgn0025455,FBgn0024234,FBgn0038224,FBgn0033373,FBgn0022338,FBgn0052626,FBgn0263112,FBgn0016034,FBgn0034265,FBgn0260936,FBgn0023518,FBgn0014143,FBgn0005658,FBgn0026873,FBgn0017578,FBgn0004859,FBg…
GO:0048737	imaginal disc-derived appendage development	biological_process	6.997e-26	4.1168e-24	226	3767	408	12231	FBgn0003944,FBgn0000179,FBgn0036844,FBgn0038747,FBgn0025525,FBgn0038755,FBgn0030863,FBgn0015600,FBgn0003317,FBgn0010470,FBgn0013718,FBgn0001123,FBgn0004893,FBgn0003744,FBgn0027106,FBgn0003502,FBgn0003513,FBgn0011642,FBgn0261268,FBgn0261983,FBgn0000273,FBgn0260798,FBgn0000317,FBgn0000395,FBgn0261885,FBgn0260866,FBgn0026597,FBgn0004858,FBgn0263102,FBgn0010433,FBgn0259789,FBgn0039907,FBgn0003118,FBg…
GO:0001883	purine nucleoside binding	molecular_function	7.2001e-26	4.1611e-24	380	3767	793	12231	FBgn0038630,FBgn0030864,FBgn0013813,FBgn0040505,FBgn0032243,FBgn0032450,FBgn0010389,FBgn0026181,FBgn0010379,FBgn0032167,FBgn0030871,FBgn0027889,FBgn0261397,FBgn0020236,FBgn0000147,FBgn0039140,FBgn0263598,FBgn0000826,FBgn0027375,FBgn0035590,FBgn0260935,FBgn0032882,FBgn0037712,FBgn0026479,FBgn0036702,FBgn0262526,FBgn0039532,FBgn0259168,FBgn0002921,FBgn0266557,FBgn0011606,FBgn0014029,FBgn0002567,FBg…
GO:0032550	purine ribonucleoside binding	molecular_function	7.2001e-26	4.1611e-24	380	3767	793	12231	FBgn0032882,FBgn0037712,FBgn0035590,FBgn0260935,FBgn0036702,FBgn0262526,FBgn0026479,FBgn0266557,FBgn0011606,FBgn0039532,FBgn0259168,FBgn0002921,FBgn0027493,FBgn0086895,FBgn0039966,FBgn0020389,FBgn0002567,FBgn0014029,FBgn0050158,FBgn0001079,FBgn0051453,FBgn0036980,FBgn0028685,FBgn0039175,FBgn0027101,FBgn0030864,FBgn0038630,FBgn0032450,FBgn0013813,FBgn0032243,FBgn0040505,FBgn0010379,FBgn0030871,FBg…
GO:0032555	purine ribonucleotide binding	molecular_function	7.2001e-26	4.1611e-24	380	3767	793	12231	FBgn0019968,FBgn0051118,FBgn0015282,FBgn0004913,FBgn0025743,FBgn0011739,FBgn0003483,FBgn0029891,FBgn0026059,FBgn0024329,FBgn0033244,FBgn0000115,FBgn0039925,FBgn0039877,FBgn0038344,FBgn0016693,FBgn0020633,FBgn0267698,FBgn0038745,FBgn0004556,FBgn0022338,FBgn0262617,FBgn0020255,FBgn0013812,FBgn0038902,FBgn0003169,FBgn0003502,FBgn0260798,FBgn0000317,FBgn0000273,FBgn0040283,FBgn0086706,FBgn0001123,FBg…
GO:0001882	nucleoside binding	molecular_function	9.1265e-26	5.2435e-24	382	3767	799	12231	FBgn0004381,FBgn0000723,FBgn0037726,FBgn0003545,FBgn0028509,FBgn0261850,FBgn0024326,FBgn0263076,FBgn0035733,FBgn0033734,FBgn0261387,FBgn0032120,FBgn0039020,FBgn0030512,FBgn0038145,FBgn0261984,FBgn0259712,FBgn0032083,FBgn0262519,FBgn0003371,FBgn0030683,FBgn0030855,FBgn0032154,FBgn0261456,FBgn0250786,FBgn0011737,FBgn0032026,FBgn0264959,FBgn0260934,FBgn0032031,FBgn0024227,FBgn0003996,FBgn0029736,FBg…
GO:0048736	appendage development	biological_process	9.2738e-26	5.2969e-24	227	3767	411	12231	FBgn0035533,FBgn0038197,FBgn0015402,FBgn0028546,FBgn0000352,FBgn0003090,FBgn0001122,FBgn0000114,FBgn0023172,FBgn0004197,FBgn0005630,FBgn0014343,FBgn0003447,FBgn0010575,FBgn0052666,FBgn0031118,FBgn0030766,FBgn0016917,FBgn0267791,FBgn0085397,FBgn0000547,FBgn0002577,FBgn0039227,FBgn0026181,FBgn0001324,FBgn0043900,FBgn0053100,FBgn0030334,FBgn0005536,FBgn0264442,FBgn0035539,FBgn0261437,FBgn0031005,FBg…
GO:0035114	imaginal disc-derived appendage morphogenesis	biological_process	9.7461e-26	5.5343e-24	224	3767	404	12231	FBgn0260934,FBgn0264959,FBgn0015615,FBgn0263289,FBgn0004009,FBgn0004837,FBgn0003187,FBgn0028984,FBgn0030870,FBgn0002526,FBgn0003079,FBgn0020309,FBgn0035719,FBgn0001965,FBgn0028427,FBgn0035802,FBgn0025800,FBgn0000577,FBgn0027581,FBgn0000099,FBgn0045823,FBgn0035574,FBgn0265276,FBgn0261064,FBgn0260003,FBgn0037671,FBgn0004395,FBgn0053196,FBgn0036257,FBgn0265523,FBgn0001259,FBgn0261823,FBgn0000490,FBg…
GO:0035120	post-embryonic appendage morphogenesis	biological_process	1.0166e-25	5.7394e-24	221	3767	397	12231	FBgn0020261,FBgn0011715,FBgn0052372,FBgn0003175,FBgn0004657,FBgn0003984,FBgn0016797,FBgn0034249,FBgn0030808,FBgn0031903,FBgn0259176,FBgn0002932,FBgn0004635,FBgn0030505,FBgn0040388,FBgn0001250,FBgn0021818,FBgn0003310,FBgn0010382,FBgn0036152,FBgn0011205,FBgn0262111,FBgn0002783,FBgn0011648,FBgn0002985,FBgn0034012,FBgn0010399,FBgn0260938,FBgn0020224,FBgn0004864,FBgn0086901,FBgn0010825,FBgn0011817,FBg…
GO:0032549	ribonucleoside binding	molecular_function	1.0937e-25	6.1389e-24	381	3767	797	12231	FBgn0000147,FBgn0020236,FBgn0261397,FBgn0027889,FBgn0027375,FBgn0000826,FBgn0263598,FBgn0039140,FBgn0030864,FBgn0038630,FBgn0032167,FBgn0030871,FBgn0010379,FBgn0026181,FBgn0010389,FBgn0032450,FBgn0040505,FBgn0032243,FBgn0013813,FBgn0036980,FBgn0050158,FBgn0051453,FBgn0001079,FBgn0027101,FBgn0028685,FBgn0039175,FBgn0262526,FBgn0036702,FBgn0026479,FBgn0037712,FBgn0032882,FBgn0260935,FBgn0035590,FBg…
GO:0006897	endocytosis	biological_process	1.1609e-25	6.4635e-24	196	3767	339	12231	FBgn0000250,FBgn0031450,FBgn0039808,FBgn0010303,FBgn0020510,FBgn0033859,FBgn0022027,FBgn0015772,FBgn0023216,FBgn0010300,FBgn0261983,FBgn0000319,FBgn0015806,FBgn0011771,FBgn0031304,FBgn0030329,FBgn0266019,FBgn0005632,FBgn0261514,FBgn0015278,FBgn0028969,FBgn0037702,FBgn0029092,FBgn0039687,FBgn0267488,FBgn0264922,FBgn0034537,FBgn0262527,FBgn0000212,FBgn0011708,FBgn0034118,FBgn0014859,FBgn0031216,FBg…
GO:0035639	purine ribonucleoside triphosphate binding	molecular_function	1.1647e-25	6.4635e-24	379	3767	792	12231	FBgn0030864,FBgn0038630,FBgn0032450,FBgn0013813,FBgn0032243,FBgn0040505,FBgn0010379,FBgn0032167,FBgn0030871,FBgn0010389,FBgn0026181,FBgn0027889,FBgn0261397,FBgn0000147,FBgn0020236,FBgn0039140,FBgn0263598,FBgn0027375,FBgn0000826,FBgn0032882,FBgn0037712,FBgn0035590,FBgn0260935,FBgn0036702,FBgn0262526,FBgn0026479,FBgn0011606,FBgn0266557,FBgn0039532,FBgn0259168,FBgn0002921,FBgn0027493,FBgn0086895,FBg…
GO:0048585	negative regulation of response to stimulus	biological_process	1.2422e-25	6.8548e-24	169	3767	278	12231	FBgn0011764,FBgn0001075,FBgn0016078,FBgn0039055,FBgn0261570,FBgn0043903,FBgn0003969,FBgn0000499,FBgn0263593,FBgn0264493,FBgn0260936,FBgn0035610,FBgn0026597,FBgn0003118,FBgn0020440,FBgn0000541,FBgn0003731,FBgn0040079,FBgn0027363,FBgn0033081,FBgn0031450,FBgn0260866,FBgn0003165,FBgn0043575,FBgn0259927,FBgn0022027,FBgn0260798,FBgn0261983,FBgn0029094,FBgn0000273,FBgn0031044,FBgn0045035,FBgn0003317,FBg…
GO:0035107	appendage morphogenesis	biological_process	1.2935e-25	7.0977e-24	225	3767	407	12231	FBgn0030808,FBgn0034249,FBgn0003984,FBgn0004657,FBgn0016797,FBgn0052372,FBgn0003175,FBgn0011715,FBgn0020261,FBgn0259176,FBgn0002932,FBgn0031903,FBgn0260635,FBgn0010382,FBgn0036152,FBgn0003310,FBgn0021818,FBgn0001250,FBgn0040388,FBgn0004635,FBgn0030505,FBgn0260938,FBgn0020224,FBgn0010399,FBgn0034012,FBgn0011648,FBgn0002985,FBgn0002783,FBgn0262111,FBgn0011205,FBgn0004870,FBgn0003256,FBgn0025879,FBg…
GO:0035556	intracellular signal transduction	biological_process	1.7265e-25	9.4203e-24	271	3767	519	12231	FBgn0015797,FBgn0040022,FBgn0003041,FBgn0085447,FBgn0086901,FBgn0041191,FBgn0014388,FBgn0004864,FBgn0086356,FBgn0000479,FBgn0025836,FBgn0035437,FBgn0013987,FBgn0026060,FBgn0263667,FBgn0015546,FBgn0036486,FBgn0259243,FBgn0039889,FBgn0030088,FBgn0259483,FBgn0039338,FBgn0014340,FBgn0044823,FBgn0010269,FBgn0035229,FBgn0034577,FBgn0034249,FBgn0023423,FBgn0037573,FBgn0020496,FBgn0021760,FBgn0020279,FBg…
GO:0097159	organic cyclic compound binding	molecular_function	3.6277e-25	1.9684e-23	1010	3767	2577	12231	FBgn0013762,FBgn0025454,FBgn0000179,FBgn0027602,FBgn0039115,FBgn0035849,FBgn0000606,FBgn0015331,FBgn0036134,FBgn0015806,FBgn0033169,FBgn0011723,FBgn0003651,FBgn0002521,FBgn0032444,FBgn0041111,FBgn0031874,FBgn0040305,FBgn0033948,FBgn0033688,FBgn0030268,FBgn0004406,FBgn0264607,FBgn0053519,FBgn0015298,FBgn0015772,FBgn0023519,FBgn0086675,FBgn0031882,FBgn0002922,FBgn0024542,FBgn0039808,FBgn0011758,FBg…
GO:0051726	regulation of cell cycle	biological_process	3.6716e-25	1.9772e-23	195	3767	339	12231	FBgn0260639,FBgn0003732,FBgn0003268,FBgn0015509,FBgn0002466,FBgn0036152,FBgn0010382,FBgn0002783,FBgn0004855,FBgn0023423,FBgn0031952,FBgn0021760,FBgn0028837,FBgn0011648,FBgn0023213,FBgn0029881,FBgn0263933,FBgn0039403,FBgn0004170,FBgn0012058,FBgn0002914,FBgn0037816,FBgn0061476,FBgn0004644,FBgn0044323,FBgn0011277,FBgn0015546,FBgn0004373,FBgn0262468,FBgn0010316,FBgn0038814,FBgn0035640,FBgn0264357,FBg…
GO:0006468	protein phosphorylation	biological_process	3.6843e-25	1.9772e-23	224	3767	407	12231	FBgn0264922,FBgn0025455,FBgn0019990,FBgn0030018,FBgn0263237,FBgn0024329,FBgn0261524,FBgn0025743,FBgn0001086,FBgn0011739,FBgn0029891,FBgn0038816,FBgn0264493,FBgn0259680,FBgn0267698,FBgn0265045,FBgn0033244,FBgn0030891,FBgn0010433,FBgn0037255,FBgn0262617,FBgn0013435,FBgn0027587,FBgn0260399,FBgn0040281,FBgn0003731,FBgn0020440,FBgn0026370,FBgn0011573,FBgn0031450,FBgn0000404,FBgn0038902,FBgn0020510,FBg…
GO:0023057	negative regulation of signaling	biological_process	4.7341e-25	2.5267e-23	153	3767	245	12231	FBgn0003090,FBgn0000352,FBgn0028546,FBgn0038197,FBgn0010575,FBgn0031799,FBgn0033901,FBgn0023172,FBgn0004197,FBgn0031885,FBgn0010379,FBgn0029976,FBgn0000547,FBgn0020278,FBgn0040505,FBgn0016917,FBgn0015279,FBgn0036740,FBgn0020493,FBgn0012051,FBgn0004638,FBgn0037015,FBgn0000097,FBgn0002573,FBgn0030941,FBgn0035853,FBgn0036373,FBgn0001079,FBgn0017581,FBgn0001332,FBgn0034068,FBgn0260940,FBgn0262866,FBg…
GO:1901363	heterocyclic compound binding	molecular_function	4.8458e-25	2.5693e-23	1004	3767	2561	12231	FBgn0037370,FBgn0028685,FBgn0027599,FBgn0039175,FBgn0030099,FBgn0015828,FBgn0085383,FBgn0025186,FBgn0050158,FBgn0085451,FBgn0005771,FBgn0263995,FBgn0011606,FBgn0266557,FBgn0001235,FBgn0039532,FBgn0002921,FBgn0259168,FBgn0002622,FBgn0086895,FBgn0020389,FBgn0033302,FBgn0036927,FBgn0033902,FBgn0039218,FBgn0035590,FBgn0260935,FBgn0000473,FBgn0262526,FBgn0015799,FBgn0039140,FBgn0033380,FBgn0263598,FBg…
GO:0006807	nitrogen compound metabolic process	biological_process	4.8666e-25	2.5693e-23	1010	3767	2579	12231	FBgn0023506,FBgn0261239,FBgn0262166,FBgn0027490,FBgn0266282,FBgn0036272,FBgn0035436,FBgn0261648,FBgn0004897,FBgn0031456,FBgn0259139,FBgn0029006,FBgn0043456,FBgn0004838,FBgn0038371,FBgn0264492,FBgn0085484,FBgn0033636,FBgn0004106,FBgn0003862,FBgn0030646,FBgn0250753,FBgn0003023,FBgn0012051,FBgn0037263,FBgn0004638,FBgn0016977,FBgn0002573,FBgn0038168,FBgn0028471,FBgn0030932,FBgn0035918,FBgn0027617,FBg…
GO:0040007	growth	biological_process	6.9785e-25	3.6645e-23	212	3767	380	12231	FBgn0038100,FBgn0266053,FBgn0041781,FBgn0053526,FBgn0030530,FBgn0015269,FBgn0267002,FBgn0032475,FBgn0023169,FBgn0034012,FBgn0011648,FBgn0034135,FBgn0020279,FBgn0036101,FBgn0036165,FBgn0016797,FBgn0004657,FBgn0262516,FBgn0038063,FBgn0263933,FBgn0053094,FBgn0261788,FBgn0259176,FBgn0000422,FBgn0259483,FBgn0010415,FBgn0003392,FBgn0037203,FBgn0035060,FBgn0261811,FBgn0262081,FBgn0003870,FBgn0261258,FBg…
GO:0034654	nucleobase-containing compound biosynthetic process	biological_process	7.1464e-25	3.7326e-23	481	3767	1070	12231	FBgn0038980,FBgn0036179,FBgn0020617,FBgn0033486,FBgn0022361,FBgn0000352,FBgn0010328,FBgn0002183,FBgn0038197,FBgn0015402,FBgn0038742,FBgn0028999,FBgn0028387,FBgn0035145,FBgn0265193,FBgn0039227,FBgn0001324,FBgn0036964,FBgn0031657,FBgn0027339,FBgn0000504,FBgn0034707,FBgn0042630,FBgn0002891,FBgn0086695,FBgn0000097,FBgn0020307,FBgn0016977,FBgn0002573,FBgn0004638,FBgn0035357,FBgn0037008,FBgn0004360,FBg…
GO:0006796	phosphate-containing compound metabolic process	biological_process	8.6144e-25	4.4754e-23	420	3767	907	12231	FBgn0025335,FBgn0035437,FBgn0033844,FBgn0003308,FBgn0011826,FBgn0022382,FBgn0034997,FBgn0013987,FBgn0032054,FBgn0259243,FBgn0038271,FBgn0267385,FBgn0037816,FBgn0000320,FBgn0001258,FBgn0024179,FBgn0030035,FBgn0004864,FBgn0031518,FBgn0011817,FBgn0000479,FBgn0266375,FBgn0002121,FBgn0035945,FBgn0027497,FBgn0035464,FBgn0003204,FBgn0037573,FBgn0038603,FBgn0027579,FBgn0036369,FBgn0030421,FBgn0019644,FBg…
GO:0006351	transcription, DNA-templated	biological_process	1.0479e-24	5.387e-23	425	3767	921	12231	FBgn0004510,FBgn0015371,FBgn0039337,FBgn0000577,FBgn0025800,FBgn0086613,FBgn0040071,FBgn0028402,FBgn0003334,FBgn0265276,FBgn0264075,FBgn0004837,FBgn0033052,FBgn0033749,FBgn0001168,FBgn0001965,FBgn0020309,FBgn0003430,FBgn0011836,FBgn0005638,FBgn0261573,FBgn0262519,FBgn0003371,FBgn0001150,FBgn0008646,FBgn0027951,FBgn0086908,FBgn0004102,FBgn0261456,FBgn0035993,FBgn0025825,FBgn0037376,FBgn0013263,FBg…
GO:0097659	nucleic acid-templated transcription	biological_process	1.0479e-24	5.387e-23	425	3767	921	12231	FBgn0002735,FBgn0001325,FBgn0022764,FBgn0030801,FBgn0054031,FBgn0263352,FBgn0033015,FBgn0085444,FBgn0013717,FBgn0002775,FBgn0000370,FBgn0025525,FBgn0028982,FBgn0013756,FBgn0000273,FBgn0029094,FBgn0023216,FBgn0030477,FBgn0011586,FBgn0004878,FBgn0024234,FBgn0263112,FBgn0016034,FBgn0034265,FBgn0260936,FBgn0023518,FBgn0005658,FBgn0014143,FBgn0026873,FBgn0003567,FBgn0017578,FBgn0004859,FBgn0003483,FBg…
GO:0006355	regulation of transcription, DNA-templated	biological_process	1.0898e-24	5.5153e-23	394	3767	839	12231	FBgn0036239,FBgn0037015,FBgn0003862,FBgn0012051,FBgn0037008,FBgn0035357,FBgn0004360,FBgn0004638,FBgn0002573,FBgn0020307,FBgn0016977,FBgn0000097,FBgn0042630,FBgn0051716,FBgn0027490,FBgn0262166,FBgn0261239,FBgn0000018,FBgn0261648,FBgn0004897,FBgn0263979,FBgn0029006,FBgn0264492,FBgn0011763,FBgn0040318,FBgn0000546,FBgn0004106,FBgn0033636,FBgn0040273,FBgn0015402,FBgn0038197,FBgn0002183,FBgn0010328,FBg…
GO:1903506	regulation of nucleic acid-templated transcription	biological_process	1.0898e-24	5.5153e-23	394	3767	839	12231	FBgn0262169,FBgn0263593,FBgn0013799,FBgn0000212,FBgn0022238,FBgn0019972,FBgn0015296,FBgn0011291,FBgn0262527,FBgn0000139,FBgn0014859,FBgn0259789,FBgn0010433,FBgn0263102,FBgn0045852,FBgn0261793,FBgn0000541,FBgn0003118,FBgn0024288,FBgn0030093,FBgn0039066,FBgn0005612,FBgn0030891,FBgn0001321,FBgn0024371,FBgn0040305,FBgn0003513,FBgn0045035,FBgn0002922,FBgn0031450,FBgn0003575,FBgn0037760,FBgn0010303,FBg…
GO:2001141	regulation of RNA biosynthetic process	biological_process	1.0898e-24	5.5153e-23	394	3767	839	12231	FBgn0045035,FBgn0003513,FBgn0040305,FBgn0024371,FBgn0011758,FBgn0002552,FBgn0000395,FBgn0003165,FBgn0261885,FBgn0039904,FBgn0010303,FBgn0037760,FBgn0003575,FBgn0002922,FBgn0031450,FBgn0035849,FBgn0003053,FBgn0000606,FBgn0003944,FBgn0000179,FBgn0033846,FBgn0037792,FBgn0031711,FBgn0025674,FBgn0011723,FBgn0003651,FBgn0002521,FBgn0041111,FBgn0036134,FBgn0003317,FBgn0013799,FBgn0263593,FBgn0262169,FBg…
GO:0032774	RNA biosynthetic process	biological_process	1.1464e-24	5.7717e-23	426	3767	924	12231	FBgn0004870,FBgn0038872,FBgn0004914,FBgn0000448,FBgn0001978,FBgn0263772,FBgn0014388,FBgn0033029,FBgn0035106,FBgn0000320,FBgn0051390,FBgn0002733,FBgn0027950,FBgn0035518,FBgn0032988,FBgn0003870,FBgn0011289,FBgn0034051,FBgn0037248,FBgn0004656,FBgn0035769,FBgn0001138,FBgn0011277,FBgn0259938,FBgn0028550,FBgn0023076,FBgn0016797,FBgn0266450,FBgn0010269,FBgn0000382,FBgn0000568,FBgn0263072,FBgn0038063,FBg…
GO:0007472	wing disc morphogenesis	biological_process	1.9195e-24	9.6141e-23	200	3767	354	12231	FBgn0028427,FBgn0035719,FBgn0020309,FBgn0002526,FBgn0003079,FBgn0030870,FBgn0036919,FBgn0028984,FBgn0003187,FBgn0004837,FBgn0263289,FBgn0004009,FBgn0264959,FBgn0260934,FBgn0015615,FBgn0004395,FBgn0037671,FBgn0260003,FBgn0265276,FBgn0261064,FBgn0045823,FBgn0000099,FBgn0027581,FBgn0000577,FBgn0025800,FBgn0020251,FBgn0020386,FBgn0001169,FBgn0014133,FBgn0262736,FBgn0000490,FBgn0261823,FBgn0001259,FBg…
GO:0048592	eye morphogenesis	biological_process	2.3572e-24	1.1687e-22	172	3767	290	12231	FBgn0004837,FBgn0004009,FBgn0263289,FBgn0000635,FBgn0024189,FBgn0001233,FBgn0003720,FBgn0264075,FBgn0086677,FBgn0001168,FBgn0001965,FBgn0037182,FBgn0015371,FBgn0086712,FBgn0264006,FBgn0261854,FBgn0266671,FBgn0032929,FBgn0043884,FBgn0027053,FBgn0025360,FBgn0003654,FBgn0259210,FBgn0003410,FBgn0027335,FBgn0000490,FBgn0261984,FBgn0041184,FBgn0259212,FBgn0262699,FBgn0004102,FBgn0261456,FBgn0053193,FBg…
GO:0090596	sensory organ morphogenesis	biological_process	2.3572e-24	1.1687e-22	172	3767	290	12231	FBgn0011758,FBgn0003169,FBgn0000319,FBgn0261268,FBgn0001308,FBgn0003513,FBgn0046704,FBgn0003651,FBgn0259685,FBgn0024836,FBgn0011661,FBgn0041111,FBgn0003317,FBgn0033179,FBgn0003053,FBgn0000179,FBgn0005632,FBgn0000464,FBgn0001108,FBgn0000543,FBgn0011207,FBgn0001075,FBgn0019972,FBgn0000119,FBgn0000499,FBgn0001083,FBgn0011739,FBgn0025743,FBgn0043903,FBgn0015754,FBgn0023518,FBgn0027609,FBgn0004859,FBg…
GO:0007476	imaginal disc-derived wing morphogenesis	biological_process	3.0929e-24	1.5257e-22	197	3767	348	12231	FBgn0038257,FBgn0004644,FBgn0001269,FBgn0010434,FBgn0004656,FBgn0263667,FBgn0038862,FBgn0003870,FBgn0035632,FBgn0025571,FBgn0010909,FBgn0039335,FBgn0016081,FBgn0015919,FBgn0011300,FBgn0004390,FBgn0000289,FBgn0265434,FBgn0265048,FBgn0004864,FBgn0086901,FBgn0010825,FBgn0003557,FBgn0011817,FBgn0025879,FBgn0003256,FBgn0011205,FBgn0262111,FBgn0002783,FBgn0011648,FBgn0034012,FBgn0260938,FBgn0020224,FBg…
GO:0001745	compound eye morphogenesis	biological_process	3.1265e-24	1.5345e-22	166	3767	277	12231	FBgn0034408,FBgn0015797,FBgn0035106,FBgn0015919,FBgn0016081,FBgn0039132,FBgn0004390,FBgn0027054,FBgn0014388,FBgn0004864,FBgn0003256,FBgn0011817,FBgn0004644,FBgn0044323,FBgn0034051,FBgn0262738,FBgn0002576,FBgn0267435,FBgn0086683,FBgn0003870,FBgn0261276,FBgn0000320,FBgn0026323,FBgn0037092,FBgn0040294,FBgn0031903,FBgn0039234,FBgn0003392,FBgn0000253,FBgn0260635,FBgn0259176,FBgn0002932,FBgn0004618,FBg…
GO:0043228	non-membrane-bounded organelle	cellular_component	5.1224e-24	2.4891e-22	630	3767	1491	12231	FBgn0036621,FBgn0039674,FBgn0011692,FBgn0011737,FBgn0004837,FBgn0259209,FBgn0026620,FBgn0031868,FBgn0031955,FBgn0005666,FBgn0031020,FBgn0260003,FBgn0004378,FBgn0000047,FBgn0086613,FBgn0037481,FBgn0011286,FBgn0002565,FBgn0002938,FBgn0004868,FBgn0263076,FBgn0263396,FBgn0028734,FBgn0032876,FBgn0011202,FBgn0030366,FBgn0034753,FBgn0001208,FBgn0003545,FBgn0261823,FBgn0003330,FBgn0265082,FBgn0259876,FBg…
GO:0043232	intracellular non-membrane-bounded organelle	cellular_component	5.1224e-24	2.4891e-22	630	3767	1491	12231	FBgn0034753,FBgn0001208,FBgn0003545,FBgn0002789,FBgn0265082,FBgn0259876,FBgn0261823,FBgn0003330,FBgn0260749,FBgn0265523,FBgn0028734,FBgn0032876,FBgn0263396,FBgn0263076,FBgn0030366,FBgn0011202,FBgn0035047,FBgn0035638,FBgn0005593,FBgn0001091,FBgn0003612,FBgn0003371,FBgn0262519,FBgn0031950,FBgn0086908,FBgn0250786,FBgn0004837,FBgn0011737,FBgn0259209,FBgn0026620,FBgn0039674,FBgn0036621,FBgn0011692,FBg…
GO:0016740	transferase activity	molecular_function	5.5448e-24	2.681e-22	567	3767	1315	12231	FBgn0031020,FBgn0039254,FBgn0028402,FBgn0259824,FBgn0005666,FBgn0036544,FBgn0002938,FBgn0040376,FBgn0004888,FBgn0035484,FBgn0038074,FBgn0037481,FBgn0036621,FBgn0030573,FBgn0259174,FBgn0025638,FBgn0011589,FBgn0011737,FBgn0261456,FBgn0086908,FBgn0037376,FBgn0039311,FBgn0023528,FBgn0034817,FBgn0038306,FBgn0001311,FBgn0003371,FBgn0051523,FBgn0020251,FBgn0051690,FBgn0003330,FBgn0030600,FBgn0000723,FBg…
GO:0007389	pattern specification process	biological_process	5.8546e-24	2.8168e-22	266	3767	516	12231	FBgn0000317,FBgn0003089,FBgn0260798,FBgn0000273,FBgn0027548,FBgn0003169,FBgn0052206,FBgn0026238,FBgn0002735,FBgn0001325,FBgn0036844,FBgn0005632,FBgn0011661,FBgn0024836,FBgn0003483,FBgn0034921,FBgn0264954,FBgn0032340,FBgn0015754,FBgn0011592,FBgn0086680,FBgn0016078,FBgn0011764,FBgn0003495,FBgn0024234,FBgn0265297,FBgn0037021,FBgn0016034,FBgn0016693,FBgn0014143,FBgn0004859,FBgn0003984,FBgn0038167,FBg…
GO:0022402	cell cycle process	biological_process	5.98e-24	2.8631e-22	342	3767	709	12231	FBgn0004926,FBgn0013726,FBgn0011020,FBgn0261278,FBgn0015818,FBgn0003124,FBgn0002878,FBgn0000114,FBgn0031885,FBgn0002924,FBgn0040078,FBgn0004655,FBgn0027783,FBgn0032006,FBgn0261239,FBgn0001624,FBgn0010314,FBgn0032105,FBgn0004106,FBgn0040273,FBgn0264492,FBgn0040232,FBgn0041171,FBgn0263979,FBgn0263599,FBgn0261437,FBgn0037263,FBgn0003023,FBgn0004367,FBgn0036239,FBgn0011217,FBgn0261954,FBgn0086695,FBg…
GO:0048646	anatomical structure formation involved in morphogenesis	biological_process	8.3798e-24	3.9925e-22	286	3767	567	12231	FBgn0261854,FBgn0000709,FBgn0087035,FBgn0000351,FBgn0033348,FBgn0039709,FBgn0020238,FBgn0033260,FBgn0028968,FBgn0261963,FBgn0036480,FBgn0032891,FBgn0039232,FBgn0004009,FBgn0045759,FBgn0259228,FBgn0264560,FBgn0026371,FBgn0261560,FBgn0004811,FBgn0041096,FBgn0039620,FBgn0039286,FBgn0033897,FBgn0264695,FBgn0010215,FBgn0261285,FBgn0000711,FBgn0263930,FBgn0267727,FBgn0260632,FBgn0020503,FBgn0261266,FBg…
GO:1903047	mitotic cell cycle process	biological_process	1.1961e-23	5.6709e-22	266	3767	518	12231	FBgn0010382,FBgn0004237,FBgn0260639,FBgn0002787,FBgn0002466,FBgn0031601,FBgn0002783,FBgn0004855,FBgn0030276,FBgn0023423,FBgn0021760,FBgn0034958,FBgn0039403,FBgn0030500,FBgn0015019,FBgn0264291,FBgn0053094,FBgn0002914,FBgn0259483,FBgn0012058,FBgn0015546,FBgn0037473,FBgn0086356,FBgn0035194,FBgn0038872,FBgn0041191,FBgn0010621,FBgn0035640,FBgn0004419,FBgn0003041,FBgn0004379,FBgn0004889,FBgn0032444,FBg…
GO:0003002	regionalization	biological_process	1.4196e-23	6.6984e-22	246	3767	469	12231	FBgn0003984,FBgn0000206,FBgn0000382,FBgn0038167,FBgn0265998,FBgn0011715,FBgn0010269,FBgn0052372,FBgn0015524,FBgn0013469,FBgn0259176,FBgn0002932,FBgn0031903,FBgn0024222,FBgn0036814,FBgn0021818,FBgn0004635,FBgn0040388,FBgn0000562,FBgn0002985,FBgn0052133,FBgn0039380,FBgn0011648,FBgn0000014,FBgn0004650,FBgn0020224,FBgn0262111,FBgn0002783,FBgn0067317,FBgn0020496,FBgn0037573,FBgn0000183,FBgn0011817,FBg…
GO:0009892	negative regulation of metabolic process	biological_process	1.8606e-23	8.7367e-22	293	3767	587	12231	FBgn0028926,FBgn0010415,FBgn0023509,FBgn0001222,FBgn0016070,FBgn0027620,FBgn0000283,FBgn0003268,FBgn0003732,FBgn0004635,FBgn0032475,FBgn0026192,FBgn0011648,FBgn0263231,FBgn0020224,FBgn0010316,FBgn0010825,FBgn0034878,FBgn0003256,FBgn0003884,FBgn0044324,FBgn0027054,FBgn0011604,FBgn0011300,FBgn0010416,FBgn0261786,FBgn0001139,FBgn0011474,FBgn0029800,FBgn0061476,FBgn0031047,FBgn0004644,FBgn0030257,FBg…
GO:0019953	sexual reproduction	biological_process	2.2405e-23	1.047e-21	427	3767	938	12231	FBgn0262735,FBgn0003950,FBgn0020278,FBgn0000504,FBgn0015279,FBgn0028426,FBgn0039227,FBgn0250823,FBgn0002878,FBgn0039632,FBgn0038341,FBgn0005536,FBgn0036715,FBgn0015789,FBgn0003124,FBgn0263864,FBgn0086687,FBgn0262127,FBgn0000352,FBgn0023172,FBgn0040207,FBgn0000114,FBgn0263782,FBgn0000533,FBgn0000017,FBgn0263987,FBgn0010341,FBgn0261239,FBgn0001624,FBgn0032006,FBgn0000018,FBgn0039861,FBgn0263979,FBg…
GO:0009968	negative regulation of signal transduction	biological_process	2.803e-23	1.3037e-21	144	3767	232	12231	FBgn0259685,FBgn0015399,FBgn0024836,FBgn0003317,FBgn0022764,FBgn0036844,FBgn0003053,FBgn0003416,FBgn0003165,FBgn0031450,FBgn0033081,FBgn0031044,FBgn0260798,FBgn0261983,FBgn0000273,FBgn0029094,FBgn0022027,FBgn0259927,FBgn0264493,FBgn0027363,FBgn0040079,FBgn0020440,FBgn0003118,FBgn0000541,FBgn0003731,FBgn0026597,FBgn0261570,FBgn0039055,FBgn0001075,FBgn0263593,FBgn0000499,FBgn0003969,FBgn0000482,FBg…
GO:0012505	endomembrane system	cellular_component	3.3861e-23	1.5674e-21	349	3767	733	12231	FBgn0038536,FBgn0011297,FBgn0004387,FBgn0034261,FBgn0086346,FBgn0086368,FBgn0029789,FBgn0004644,FBgn0040340,FBgn0005322,FBgn0052758,FBgn0032398,FBgn0020655,FBgn0261862,FBgn0015372,FBgn0053198,FBgn0028343,FBgn0031985,FBgn0039132,FBgn0037603,FBgn0039335,FBgn0034649,FBgn0020908,FBgn0035762,FBgn0011232,FBgn0004635,FBgn0003268,FBgn0034585,FBgn0000183,FBgn0003048,FBgn0028327,FBgn0032643,FBgn0029688,FBg…
GO:0022414	reproductive process	biological_process	4.432e-23	2.0418e-21	456	3767	1019	12231	FBgn0005632,FBgn0000464,FBgn0001108,FBgn0015399,FBgn0011661,FBgn0025525,FBgn0004374,FBgn0015600,FBgn0003429,FBgn0003502,FBgn0014870,FBgn0262743,FBgn0261268,FBgn0003089,FBgn0032848,FBgn0000273,FBgn0033247,FBgn0026619,FBgn0003169,FBgn0026238,FBgn0036147,FBgn0033081,FBgn0024320,FBgn0265297,FBgn0032515,FBgn0024234,FBgn0031390,FBgn0016034,FBgn0030341,FBgn0016693,FBgn0004859,FBgn0052642,FBgn0264954,FBg…
GO:0007346	regulation of mitotic cell cycle	biological_process	6.7349e-23	3.0883e-21	136	3767	216	12231	FBgn0033081,FBgn0000404,FBgn0023177,FBgn0013756,FBgn0045035,FBgn0024371,FBgn0033247,FBgn0034231,FBgn0011661,FBgn0000173,FBgn0038827,FBgn0022764,FBgn0004889,FBgn0011708,FBgn0000212,FBgn0262527,FBgn0001086,FBgn0015754,FBgn0020633,FBgn0040066,FBgn0004859,FBgn0003731,FBgn0000541,FBgn0260399,FBgn0002914,FBgn0004170,FBgn0039403,FBgn0023213,FBgn0011648,FBgn0021760,FBgn0031952,FBgn0028837,FBgn0004855,FBg…
GO:0070727	cellular macromolecule localization	biological_process	6.812e-23	3.109e-21	211	3767	388	12231	FBgn0039110,FBgn0086356,FBgn0052758,FBgn0029830,FBgn0039114,FBgn0263198,FBgn0016975,FBgn0002566,FBgn0004864,FBgn0051229,FBgn0038810,FBgn0039132,FBgn0265434,FBgn0031078,FBgn0003041,FBgn0025725,FBgn0015797,FBgn0001087,FBgn0004242,FBgn0040294,FBgn0000181,FBgn0036928,FBgn0022213,FBgn0020497,FBgn0266756,FBgn0031536,FBgn0036974,FBgn0033264,FBgn0040340,FBgn0016041,FBgn0004644,FBgn0029789,FBgn0010434,FBg…
GO:0071702	organic substance transport	biological_process	1.181e-22	5.3652e-21	275	3767	547	12231	FBgn0002567,FBgn0039966,FBgn0024814,FBgn0042177,FBgn0015589,FBgn0010660,FBgn0033902,FBgn0050404,FBgn0031455,FBgn0030365,FBgn0262647,FBgn0033460,FBgn0261385,FBgn0033316,FBgn0036116,FBgn0032052,FBgn0029818,FBgn0260964,FBgn0001079,FBgn0050394,FBgn0036007,FBgn0010379,FBgn0031779,FBgn0039302,FBgn0052654,FBgn0014411,FBgn0264785,FBgn0034708,FBgn0263397,FBgn0036740,FBgn0262125,FBgn0037715,FBgn0263390,FBg…
GO:0030029	actin filament-based process	biological_process	1.5866e-22	7.1741e-21	149	3767	246	12231	FBgn0003292,FBgn0010303,FBgn0020510,FBgn0267795,FBgn0053519,FBgn0003502,FBgn0262743,FBgn0000317,FBgn0032848,FBgn0015806,FBgn0003317,FBgn0004028,FBgn0029903,FBgn0011771,FBgn0002773,FBgn0013718,FBgn0000667,FBgn0041111,FBgn0011661,FBgn0015278,FBgn0035917,FBgn0038747,FBgn0025455,FBgn0024277,FBgn0004687,FBgn0034072,FBgn0029906,FBgn0261549,FBgn0000499,FBgn0026179,FBgn0036044,FBgn0264598,FBgn0261836,FBg…
GO:0044703	multi-organism reproductive process	biological_process	1.6497e-22	7.4253e-21	430	3767	954	12231	FBgn0034577,FBgn0020299,FBgn0026630,FBgn0041188,FBgn0003742,FBgn0000382,FBgn0020261,FBgn0000568,FBgn0010269,FBgn0028484,FBgn0259176,FBgn0002914,FBgn0002932,FBgn0260635,FBgn0001250,FBgn0010382,FBgn0003310,FBgn0002542,FBgn0000482,FBgn0000014,FBgn0004650,FBgn0002783,FBgn0021875,FBgn0020279,FBgn0003204,FBgn0021760,FBgn0037573,FBgn0030276,FBgn0023423,FBgn0000479,FBgn0261279,FBgn0027505,FBgn0002431,FBg…
GO:0030036	actin cytoskeleton organization	biological_process	2.1372e-22	9.5752e-21	142	3767	231	12231	FBgn0000547,FBgn0002577,FBgn0003319,FBgn0020278,FBgn0026181,FBgn0265356,FBgn0013726,FBgn0250823,FBgn0086657,FBgn0003124,FBgn0000182,FBgn0041775,FBgn0035533,FBgn0001122,FBgn0004177,FBgn0036742,FBgn0023172,FBgn0003447,FBgn0031437,FBgn0015513,FBgn0000017,FBgn0010341,FBgn0263987,FBgn0032006,FBgn0039532,FBgn0038369,FBgn0039966,FBgn0267350,FBgn0262733,FBgn0025742,FBgn0020621,FBgn0004367,FBgn0267378,FBg…
GO:0009893	positive regulation of metabolic process	biological_process	2.3883e-22	1.0652e-20	273	3767	544	12231	FBgn0015806,FBgn0003360,FBgn0259685,FBgn0011723,FBgn0037792,FBgn0003944,FBgn0021796,FBgn0000606,FBgn0031450,FBgn0031458,FBgn0000250,FBgn0010303,FBgn0039566,FBgn0002552,FBgn0003165,FBgn0039904,FBgn0261885,FBgn0260794,FBgn0267390,FBgn0040305,FBgn0261983,FBgn0039066,FBgn0030093,FBgn0030891,FBgn0259789,FBgn0010433,FBgn0003118,FBgn0261793,FBgn0019972,FBgn0000212,FBgn0264922,FBgn0262527,FBgn0261479,FBg…
GO:0016773	phosphotransferase activity, alcohol group as acceptor	molecular_function	2.463e-22	1.0934e-20	190	3767	341	12231	FBgn0033791,FBgn0010269,FBgn0260990,FBgn0061359,FBgn0265998,FBgn0028484,FBgn0038167,FBgn0035397,FBgn0014006,FBgn0025592,FBgn0027497,FBgn0011205,FBgn0038603,FBgn0002466,FBgn0023169,FBgn0020391,FBgn0025640,FBgn0024222,FBgn0014930,FBgn0024179,FBgn0027569,FBgn0044826,FBgn0011300,FBgn0086906,FBgn0004924,FBgn0004864,FBgn0003256,FBgn0036402,FBgn0036942,FBgn0264357,FBgn0011817,FBgn0031518,FBgn0266375,FBg…
GO:0030554	adenyl nucleotide binding	molecular_function	2.4766e-22	1.0945e-20	311	3767	641	12231	FBgn0002924,FBgn0040078,FBgn0027783,FBgn0032006,FBgn0262866,FBgn0262733,FBgn0004106,FBgn0025936,FBgn0264492,FBgn0040232,FBgn0261014,FBgn0263599,FBgn0039244,FBgn0015024,FBgn0005640,FBgn0003261,FBgn0027580,FBgn0001565,FBgn0046685,FBgn0020621,FBgn0030672,FBgn0002174,FBgn0045980,FBgn0017581,FBgn0016696,FBgn0031449,FBgn0261278,FBgn0003124,FBgn0037093,FBgn0086657,FBgn0250823,FBgn0000352,FBgn0086899,FBg…
GO:0005856	cytoskeleton	cellular_component	4.9893e-22	2.1951e-20	300	3767	615	12231	FBgn0031950,FBgn0039537,FBgn0262699,FBgn0262734,FBgn0005655,FBgn0035638,FBgn0003371,FBgn0263076,FBgn0031781,FBgn0003654,FBgn0032876,FBgn0019947,FBgn0261387,FBgn0011202,FBgn0034753,FBgn0004381,FBgn0037726,FBgn0003545,FBgn0003149,FBgn0265082,FBgn0031955,FBgn0031020,FBgn0260003,FBgn0000047,FBgn0004378,FBgn0011286,FBgn0002938,FBgn0261004,FBgn0004868,FBgn0015218,FBgn0011745,FBgn0020653,FBgn0011692,FBg…
GO:0032559	adenyl ribonucleotide binding	molecular_function	5.0499e-22	2.2118e-20	307	3767	633	12231	FBgn0028687,FBgn0035244,FBgn0010303,FBgn0028686,FBgn0001308,FBgn0030407,FBgn0053519,FBgn0264607,FBgn0015772,FBgn0003744,FBgn0267390,FBgn0030268,FBgn0032444,FBgn0015806,FBgn0003317,FBgn0053531,FBgn0015331,FBgn0000721,FBgn0027602,FBgn0004379,FBgn0020385,FBgn0013762,FBgn0263237,FBgn0019990,FBgn0030018,FBgn0000212,FBgn0036888,FBgn0010246,FBgn0261524,FBgn0020306,FBgn0022709,FBgn0040299,FBgn0033661,FBg…
GO:0048609	multicellular organismal reproductive process	biological_process	6.7506e-22	2.9434e-20	419	3767	930	12231	FBgn0263929,FBgn0003731,FBgn0037146,FBgn0000541,FBgn0026370,FBgn0003118,FBgn0263102,FBgn0010433,FBgn0261836,FBgn0026597,FBgn0011211,FBgn0000996,FBgn0023129,FBgn0261524,FBgn0003943,FBgn0000499,FBgn0024889,FBgn0034072,FBgn0020306,FBgn0043903,FBgn0035233,FBgn0262467,FBgn0030018,FBgn0011207,FBgn0262527,FBgn0264922,FBgn0034451,FBgn0000212,FBgn0011708,FBgn0019972,FBgn0003416,FBgn0033846,FBgn0000543,FBg…
GO:0051704	multi-organism process	biological_process	7.5084e-22	3.2593e-20	539	3767	1260	12231	FBgn0004363,FBgn0042712,FBgn0024222,FBgn0011232,FBgn0000183,FBgn0036895,FBgn0003231,FBgn0011205,FBgn0020224,FBgn0052133,FBgn0030320,FBgn0263231,FBgn0029881,FBgn0262516,FBgn0029161,FBgn0031145,FBgn0040323,FBgn0003388,FBgn0026323,FBgn0004242,FBgn0037203,FBgn0023096,FBgn0036574,FBgn0002576,FBgn0082598,FBgn0010825,FBgn0015381,FBgn0035850,FBgn0010316,FBgn0005659,FBgn0005322,FBgn0261446,FBgn0031453,FBg…
GO:0005524	ATP binding	molecular_function	8.2065e-22	3.5466e-20	306	3767	632	12231	FBgn0263231,FBgn0038035,FBgn0036892,FBgn0036104,FBgn0011205,FBgn0030631,FBgn0024222,FBgn0003732,FBgn0011659,FBgn0260985,FBgn0031734,FBgn0015391,FBgn0014006,FBgn0038167,FBgn0265998,FBgn0002576,FBgn0011225,FBgn0004387,FBgn0023096,FBgn0025625,FBgn0040208,FBgn0033915,FBgn0031855,FBgn0000239,FBgn0033160,FBgn0010909,FBgn0015075,FBgn0026323,FBgn0262081,FBgn0035632,FBgn0011300,FBgn0011604,FBgn0044826,FBg…
GO:0016301	kinase activity	molecular_function	1.4254e-21	6.1331e-20	198	3767	364	12231	FBgn0001186,FBgn0027889,FBgn0261873,FBgn0000017,FBgn0000147,FBgn0052666,FBgn0015402,FBgn0086899,FBgn0000826,FBgn0036742,FBgn0086657,FBgn0037093,FBgn0250823,FBgn0034141,FBgn0038630,FBgn0030864,FBgn0003124,FBgn0040505,FBgn0015279,FBgn0261278,FBgn0026181,FBgn0010389,FBgn0010379,FBgn0016696,FBgn0045980,FBgn0001079,FBgn0017581,FBgn0004367,FBgn0046685,FBgn0020621,FBgn0027101,FBgn0260935,FBgn0035590,FBg…
GO:1902531	regulation of intracellular signal transduction	biological_process	1.8286e-21	7.8335e-20	155	3767	264	12231	FBgn0264895,FBgn0003371,FBgn0041184,FBgn0005638,FBgn0003612,FBgn0259785,FBgn0028500,FBgn0039924,FBgn0000711,FBgn0031762,FBgn0259212,FBgn0261119,FBgn0020660,FBgn0025740,FBgn0005198,FBgn0011785,FBgn0265082,FBgn0041100,FBgn0050440,FBgn0037359,FBgn0043884,FBgn0040011,FBgn0024326,FBgn0034240,FBgn0032796,FBgn0036934,FBgn0031030,FBgn0035574,FBgn0264560,FBgn0028538,FBgn0265597,FBgn0035761,FBgn0259228,FBg…
GO:0097367	carbohydrate derivative binding	molecular_function	2.0088e-21	8.5677e-20	431	3767	967	12231	FBgn0030029,FBgn0039020,FBgn0000490,FBgn0024326,FBgn0263076,FBgn0261387,FBgn0032120,FBgn0031850,FBgn0033734,FBgn0035733,FBgn0261850,FBgn0000723,FBgn0004381,FBgn0037726,FBgn0028509,FBgn0003545,FBgn0261456,FBgn0250786,FBgn0032154,FBgn0030855,FBgn0030683,FBgn0262519,FBgn0032083,FBgn0003371,FBgn0030512,FBgn0261984,FBgn0259712,FBgn0038145,FBgn0264753,FBgn0028427,FBgn0050392,FBgn0040370,FBgn0015793,FBg…
GO:0004672	protein kinase activity	molecular_function	2.3072e-21	9.7975e-20	157	3767	269	12231	FBgn0005640,FBgn0015024,FBgn0035590,FBgn0260935,FBgn0051145,FBgn0264492,FBgn0025936,FBgn0262733,FBgn0004106,FBgn0262866,FBgn0032006,FBgn0010314,FBgn0259168,FBgn0017581,FBgn0001079,FBgn0045980,FBgn0020621,FBgn0046685,FBgn0004367,FBgn0027101,FBgn0250823,FBgn0037093,FBgn0086657,FBgn0003124,FBgn0030864,FBgn0038630,FBgn0261278,FBgn0040505,FBgn0016696,FBgn0010379,FBgn0010389,FBgn0026181,FBgn0027889,FBg…
GO:0071944	cell periphery	cellular_component	2.6003e-21	1.0995e-19	442	3767	998	12231	FBgn0031458,FBgn0030204,FBgn0035244,FBgn0263220,FBgn0037590,FBgn0003744,FBgn0004359,FBgn0005390,FBgn0010300,FBgn0032633,FBgn0264607,FBgn0036494,FBgn0000319,FBgn0261983,FBgn0002524,FBgn0038412,FBgn0000721,FBgn0039212,FBgn0003317,FBgn0037339,FBgn0259685,FBgn0011771,FBgn0000535,FBgn0013718,FBgn0015622,FBgn0040726,FBgn0037702,FBgn0036888,FBgn0010452,FBgn0034451,FBgn0001075,FBgn0011708,FBgn0024277,FBg…
GO:0009059	macromolecule biosynthetic process	biological_process	2.8098e-21	1.1829e-19	619	3767	1492	12231	FBgn0021872,FBgn0024909,FBgn0019949,FBgn0039858,FBgn0011336,FBgn0031016,FBgn0037327,FBgn0053554,FBgn0001233,FBgn0085436,FBgn0045759,FBgn0035851,FBgn0004009,FBgn0001179,FBgn0034858,FBgn0029504,FBgn0039938,FBgn0261963,FBgn0002906,FBgn0002441,FBgn0003415,FBgn0026401,FBgn0263930,FBgn0039286,FBgn0033897,FBgn0038016,FBgn0005561,FBgn0010417,FBgn0038499,FBgn0262619,FBgn0026441,FBgn0034277,FBgn0037008,FBg…
GO:0034645	cellular macromolecule biosynthetic process	biological_process	3.1019e-21	1.3003e-19	616	3767	1484	12231	FBgn0042712,FBgn0053526,FBgn0034649,FBgn0021818,FBgn0027592,FBgn0032643,FBgn0022740,FBgn0038035,FBgn0029095,FBgn0023512,FBgn0035916,FBgn0028926,FBgn0003687,FBgn0034258,FBgn0011481,FBgn0000559,FBgn0027620,FBgn0016070,FBgn0015524,FBgn0034729,FBgn0037529,FBgn0001139,FBgn0031988,FBgn0031115,FBgn0015075,FBgn0029176,FBgn0029800,FBgn0026741,FBgn0086368,FBgn0032321,FBgn0086710,FBgn0036974,FBgn0002576,FBg…
GO:0010605	negative regulation of macromolecule metabolic process	biological_process	3.3464e-21	1.3967e-19	275	3767	557	12231	FBgn0033846,FBgn0003944,FBgn0000179,FBgn0003053,FBgn0000606,FBgn0036134,FBgn0264001,FBgn0259685,FBgn0002521,FBgn0260444,FBgn0024371,FBgn0033686,FBgn0003513,FBgn0031044,FBgn0045035,FBgn0031450,FBgn0037760,FBgn0003575,FBgn0011758,FBgn0003165,FBgn0004858,FBgn0263102,FBgn0020440,FBgn0260399,FBgn0039214,FBgn0027495,FBgn0020306,FBgn0024183,FBgn0001086,FBgn0022238,FBgn0010382,FBgn0038100,FBgn0263974,FBg…
GO:0042330	taxis	biological_process	4.1434e-21	1.7221e-19	181	3767	326	12231	FBgn0004606,FBgn0029840,FBgn0052423,FBgn0004449,FBgn0001624,FBgn0014007,FBgn0027948,FBgn0266557,FBgn0010341,FBgn0015589,FBgn0261985,FBgn0264492,FBgn0041171,FBgn0004838,FBgn0262473,FBgn0029123,FBgn0010772,FBgn0029117,FBgn0020493,FBgn0261451,FBgn0250753,FBgn0003862,FBgn0243511,FBgn0000629,FBgn0030941,FBgn0002573,FBgn0016977,FBgn0086686,FBgn0004926,FBgn0040505,FBgn0000504,FBgn0264975,FBgn0028999,FBg…
GO:0007409	axonogenesis	biological_process	7.0766e-21	2.9287e-19	172	3767	306	12231	FBgn0011771,FBgn0013717,FBgn0000173,FBgn0011661,FBgn0024836,FBgn0015806,FBgn0029903,FBgn0001325,FBgn0000606,FBgn0021796,FBgn0013762,FBgn0000464,FBgn0010303,FBgn0051721,FBgn0003169,FBgn0020510,FBgn0004055,FBgn0010300,FBgn0004369,FBgn0001308,FBgn0261268,FBgn0046704,FBgn0003380,FBgn0030057,FBgn0023129,FBgn0267698,FBgn0025878,FBgn0010113,FBgn0030887,FBgn0023097,FBgn0086680,FBgn0005636,FBgn0031461,FBg…
GO:0016310	phosphorylation	biological_process	7.2759e-21	2.9985e-19	276	3767	562	12231	FBgn0052230,FBgn0001079,FBgn0020493,FBgn0027101,FBgn0260935,FBgn0035590,FBgn0029840,FBgn0001332,FBgn0267350,FBgn0261108,FBgn0033483,FBgn0259168,FBgn0039532,FBgn0000147,FBgn0027889,FBgn0000826,FBgn0028546,FBgn0030864,FBgn0038630,FBgn0000064,FBgn0010379,FBgn0026181,FBgn0010389,FBgn0031633,FBgn0040505,FBgn0035039,FBgn0026317,FBgn0036934,FBgn0005666,FBgn0036544,FBgn0002938,FBgn0051140,FBgn0028427,FBg…
GO:0043933	macromolecular complex subunit organization	biological_process	1.2936e-20	5.3086e-19	413	3767	926	12231	FBgn0035918,FBgn0039067,FBgn0026430,FBgn0004638,FBgn0003475,FBgn0261437,FBgn0004367,FBgn0003862,FBgn0040232,FBgn0038371,FBgn0262733,FBgn0037540,FBgn0040273,FBgn0086916,FBgn0033636,FBgn0263979,FBgn0040372,FBgn0027783,FBgn0040078,FBgn0002924,FBgn0263987,FBgn0032105,FBgn0010341,FBgn0262123,FBgn0262166,FBgn0027490,FBgn0032006,FBgn0010314,FBgn0000017,FBgn0023172,FBgn0031885,FBgn0086899,FBgn0036742,FBg…
GO:0046907	intracellular transport	biological_process	1.4844e-20	6.0662e-19	261	3767	526	12231	FBgn0260860,FBgn0262866,FBgn0035317,FBgn0259108,FBgn0045073,FBgn0033401,FBgn0025742,FBgn0037894,FBgn0265174,FBgn0031456,FBgn0038065,FBgn0034645,FBgn0026207,FBgn0039120,FBgn0028426,FBgn0035771,FBgn0010348,FBgn0020278,FBgn0250823,FBgn0086657,FBgn0000352,FBgn0036640,FBgn0003210,FBgn0260655,FBgn0000017,FBgn0038662,FBgn0264560,FBgn0032699,FBgn0087013,FBgn0086357,FBgn0032782,FBgn0266758,FBgn0086757,FBg…
GO:0034613	cellular protein localization	biological_process	1.6409e-20	6.6778e-19	178	3767	322	12231	FBgn0024833,FBgn0011202,FBgn0040475,FBgn0032120,FBgn0264855,FBgn0003654,FBgn0086358,FBgn0043884,FBgn0014366,FBgn0266671,FBgn0035704,FBgn0036141,FBgn0035960,FBgn0010215,FBgn0027338,FBgn0262519,FBgn0053180,FBgn0003371,FBgn0267727,FBgn0034310,FBgn0011692,FBgn0010441,FBgn0030230,FBgn0028427,FBgn0033260,FBgn0028968,FBgn0087013,FBgn0032699,FBgn0031106,FBgn0030089,FBgn0032397,FBgn0086357,FBgn0033052,FBg…
GO:0045165	cell fate commitment	biological_process	1.7259e-20	6.9947e-19	245	3767	486	12231	FBgn0013718,FBgn0024836,FBgn0003651,FBgn0011723,FBgn0003053,FBgn0000606,FBgn0001325,FBgn0030052,FBgn0040080,FBgn0004889,FBgn0001108,FBgn0003944,FBgn0263352,FBgn0038617,FBgn0004878,FBgn0003165,FBgn0043550,FBgn0261885,FBgn0052206,FBgn0000404,FBgn0010300,FBgn0004893,FBgn0030057,FBgn0035192,FBgn0264493,FBgn0003118,FBgn0010113,FBgn0003731,FBgn0266579,FBgn0000541,FBgn0036696,FBgn0039909,FBgn0028582,FBg…
GO:0061564	axon development	biological_process	2.0267e-20	8.1798e-19	174	3767	313	12231	FBgn0010575,FBgn0003312,FBgn0014343,FBgn0005630,FBgn0000017,FBgn0023172,FBgn0261509,FBgn0028999,FBgn0264442,FBgn0005536,FBgn0034975,FBgn0035101,FBgn0010379,FBgn0004926,FBgn0026181,FBgn0264975,FBgn0040505,FBgn0000504,FBgn0030941,FBgn0002573,FBgn0016977,FBgn0000629,FBgn0004360,FBgn0020493,FBgn0261451,FBgn0243511,FBgn0014163,FBgn0250753,FBgn0003862,FBgn0261985,FBgn0264492,FBgn0025936,FBgn0041171,FBg…
GO:0045184	establishment of protein localization	biological_process	3.6182e-20	1.4543e-18	196	3767	367	12231	FBgn0035473,FBgn0266580,FBgn0259824,FBgn0000257,FBgn0041582,FBgn0008635,FBgn0033737,FBgn0004378,FBgn0261532,FBgn0004868,FBgn0033194,FBgn0002938,FBgn0035965,FBgn0033260,FBgn0028968,FBgn0011692,FBgn0010441,FBgn0030230,FBgn0015793,FBgn0032782,FBgn0033052,FBgn0260744,FBgn0086757,FBgn0264560,FBgn0032699,FBgn0031106,FBgn0087013,FBgn0032397,FBgn0086357,FBgn0030089,FBgn0039282,FBgn0027338,FBgn0036141,FBg…
GO:0006935	chemotaxis	biological_process	4.4876e-20	1.7963e-18	154	3767	268	12231	FBgn0001308,FBgn0004055,FBgn0010300,FBgn0004369,FBgn0046704,FBgn0051721,FBgn0003169,FBgn0020510,FBgn0000606,FBgn0001325,FBgn0021796,FBgn0000464,FBgn0013762,FBgn0011661,FBgn0024836,FBgn0013717,FBgn0029903,FBgn0015806,FBgn0000499,FBgn0015754,FBgn0020306,FBgn0011592,FBgn0004652,FBgn0034072,FBgn0005636,FBgn0086680,FBgn0033155,FBgn0024277,FBgn0016078,FBgn0010452,FBgn0000212,FBgn0003495,FBgn0031461,FBg…
GO:0010604	positive regulation of macromolecule metabolic process	biological_process	5.8565e-20	2.3347e-18	240	3767	477	12231	FBgn0003862,FBgn0003520,FBgn0028685,FBgn0015828,FBgn0004638,FBgn0003023,FBgn0001079,FBgn0036932,FBgn0004882,FBgn0025802,FBgn0037751,FBgn0032006,FBgn0010314,FBgn0025682,FBgn0001235,FBgn0261617,FBgn0261108,FBgn0040078,FBgn0029840,FBgn0086359,FBgn0033902,FBgn0042085,FBgn0004838,FBgn0029123,FBgn0015024,FBgn0024811,FBgn0261014,FBgn0033636,FBgn0040273,FBgn0262733,FBgn0000546,FBgn0040318,FBgn0011763,FBg…
GO:0046530	photoreceptor cell differentiation	biological_process	6.2349e-20	2.4754e-18	119	3767	190	12231	FBgn0000723,FBgn0266671,FBgn0032929,FBgn0015754,FBgn0043884,FBgn0000499,FBgn0027053,FBgn0025743,FBgn0011739,FBgn0025360,FBgn0003654,FBgn0259210,FBgn0003410,FBgn0027335,FBgn0038223,FBgn0004858,FBgn0261984,FBgn0010433,FBgn0003731,FBgn0041184,FBgn0003118,FBgn0265297,FBgn0000163,FBgn0261722,FBgn0053193,FBgn0261456,FBgn0005561,FBgn0004102,FBgn0261458,FBgn0028500,FBgn0035993,FBgn0046704,FBgn0263289,FBg…
GO:0044877	macromolecular complex binding	molecular_function	8.0854e-20	3.1972e-18	171	3767	309	12231	FBgn0265523,FBgn0261823,FBgn0026143,FBgn0003545,FBgn0032929,FBgn0004381,FBgn0000490,FBgn0014133,FBgn0036059,FBgn0261387,FBgn0260991,FBgn0003042,FBgn0034957,FBgn0263076,FBgn0262519,FBgn0020503,FBgn0035638,FBgn0026401,FBgn0261573,FBgn0017577,FBgn0027951,FBgn0259785,FBgn0035047,FBgn0250786,FBgn0010215,FBgn0032042,FBgn0013263,FBgn0026620,FBgn0031057,FBgn0032782,FBgn0015615,FBgn0267432,FBgn0011692,FBg…
GO:0005700	polytene chromosome	cellular_component	9.4891e-20	3.7371e-18	108	3767	167	12231	FBgn0261850,FBgn0013799,FBgn0265523,FBgn0260749,FBgn0036398,FBgn0024183,FBgn0004396,FBgn0005624,FBgn0030366,FBgn0000139,FBgn0026373,FBgn0263396,FBgn0003277,FBgn0011764,FBgn0025455,FBgn0025639,FBgn0262527,FBgn0026401,FBgn0003612,FBgn0261793,FBgn0267351,FBgn0262519,FBgn0259785,FBgn0266711,FBgn0086908,FBgn0264695,FBgn0030891,FBgn0023518,FBgn0250786,FBgn0038016,FBgn0013263,FBgn0004401,FBgn0003567,FBg…
GO:0031325	positive regulation of cellular metabolic process	biological_process	1.2136e-19	4.7604e-18	251	3767	507	12231	FBgn0260635,FBgn0259483,FBgn0004170,FBgn0031145,FBgn0001222,FBgn0004618,FBgn0002914,FBgn0014340,FBgn0019650,FBgn0028926,FBgn0038063,FBgn0010269,FBgn0263933,FBgn0011715,FBgn0014006,FBgn0023076,FBgn0003687,FBgn0002783,FBgn0020279,FBgn0037573,FBgn0011648,FBgn0002985,FBgn0022740,FBgn0000014,FBgn0015269,FBgn0021818,FBgn0024222,FBgn0022787,FBgn0026083,FBgn0016081,FBgn0034476,FBgn0015919,FBgn0041707,FBg…
GO:0042221	response to chemical	biological_process	1.3994e-19	5.4673e-18	399	3767	898	12231	FBgn0035168,FBgn0013269,FBgn0037248,FBgn0022382,FBgn0038515,FBgn0263667,FBgn0259984,FBgn0001138,FBgn0032704,FBgn0259243,FBgn0020497,FBgn0038984,FBgn0027601,FBgn0000320,FBgn0015797,FBgn0033438,FBgn0033887,FBgn0004380,FBgn0004419,FBgn0014388,FBgn0041191,FBgn0004914,FBgn0011666,FBgn0002121,FBgn0000448,FBgn0000479,FBgn0023423,FBgn0025741,FBgn0021760,FBgn0035770,FBgn0003204,FBgn0000565,FBgn0004108,FBg…
GO:0044430	cytoskeletal part	cellular_component	1.4336e-19	5.5786e-18	275	3767	569	12231	FBgn0029176,FBgn0044323,FBgn0032455,FBgn0061476,FBgn0040208,FBgn0011225,FBgn0004387,FBgn0013810,FBgn0025352,FBgn0023096,FBgn0003888,FBgn0004924,FBgn0010173,FBgn0033845,FBgn0044324,FBgn0003884,FBgn0034566,FBgn0037254,FBgn0086906,FBgn0044826,FBgn0265434,FBgn0260439,FBgn0003268,FBgn0000283,FBgn0004363,FBgn0041781,FBgn0039635,FBgn0011205,FBgn0067317,FBgn0263231,FBgn0010352,FBgn0029881,FBgn0031877,FBg…
GO:0015031	protein transport	biological_process	1.7838e-19	6.9138e-18	189	3767	354	12231	FBgn0033260,FBgn0028968,FBgn0030230,FBgn0015793,FBgn0011692,FBgn0010441,FBgn0260744,FBgn0086757,FBgn0033052,FBgn0032782,FBgn0032397,FBgn0086357,FBgn0030089,FBgn0264560,FBgn0031106,FBgn0032699,FBgn0087013,FBgn0035473,FBgn0259824,FBgn0266580,FBgn0041582,FBgn0000257,FBgn0033737,FBgn0004378,FBgn0261532,FBgn0008635,FBgn0002938,FBgn0035965,FBgn0004868,FBgn0033194,FBgn0264855,FBgn0032120,FBgn0040475,FBg…
GO:0097485	neuron projection guidance	biological_process	2.1173e-19	8.1737e-18	147	3767	255	12231	FBgn0264006,FBgn0000099,FBgn0261269,FBgn0032821,FBgn0000577,FBgn0025800,FBgn0002565,FBgn0004795,FBgn0035574,FBgn0000635,FBgn0002526,FBgn0003430,FBgn0001965,FBgn0261963,FBgn0020238,FBgn0259174,FBgn0086677,FBgn0033987,FBgn0038498,FBgn0263930,FBgn0001150,FBgn0038300,FBgn0261458,FBgn0028500,FBgn0260660,FBgn0250820,FBgn0035713,FBgn0025740,FBgn0000723,FBgn0005624,FBgn0014133,FBgn0028734,FBgn0016061,FBg…
GO:0031324	negative regulation of cellular metabolic process	biological_process	3.0081e-19	1.1567e-17	244	3767	492	12231	FBgn0027339,FBgn0053100,FBgn0036964,FBgn0039227,FBgn0265137,FBgn0026573,FBgn0262739,FBgn0003044,FBgn0011305,FBgn0000504,FBgn0015279,FBgn0266717,FBgn0000182,FBgn0264442,FBgn0028387,FBgn0026326,FBgn0000352,FBgn0022361,FBgn0028546,FBgn0038197,FBgn0010575,FBgn0031973,FBgn0014343,FBgn0030082,FBgn0000114,FBgn0031885,FBgn0000018,FBgn0001332,FBgn0034068,FBgn0261648,FBgn0004606,FBgn0266557,FBgn0040206,FBg…
GO:0044271	cellular nitrogen compound biosynthetic process	biological_process	3.5526e-19	1.3607e-17	616	3767	1510	12231	FBgn0087035,FBgn0030136,FBgn0001180,FBgn0004795,FBgn0040020,FBgn0039757,FBgn0000099,FBgn0033260,FBgn0020443,FBgn0053958,FBgn0027378,FBgn0036135,FBgn0051472,FBgn0003867,FBgn0003079,FBgn0033400,FBgn0000557,FBgn0261560,FBgn0037554,FBgn0010198,FBgn0003720,FBgn0010280,FBgn0010356,FBgn0037607,FBgn0001320,FBgn0029067,FBgn0023536,FBgn0261285,FBgn0036368,FBgn0034985,FBgn0260632,FBgn0034237,FBgn0022023,FBg…
GO:0007411	axon guidance	biological_process	3.8504e-19	1.469e-17	143	3767	247	12231	FBgn0041781,FBgn0001250,FBgn0020391,FBgn0267002,FBgn0000307,FBgn0023169,FBgn0034012,FBgn0004108,FBgn0032629,FBgn0003204,FBgn0040068,FBgn0036101,FBgn0021760,FBgn0025741,FBgn0016797,FBgn0004657,FBgn0040324,FBgn0039338,FBgn0010415,FBgn0000253,FBgn0033791,FBgn0010909,FBgn0000320,FBgn0001138,FBgn0259984,FBgn0261588,FBgn0264089,FBgn0022382,FBgn0000239,FBgn0262742,FBgn0003888,FBgn0010583,FBgn0041191,FBg…
GO:0007264	small GTPase mediated signal transduction	biological_process	5.0108e-19	1.9043e-17	134	3767	227	12231	FBgn0016794,FBgn0031118,FBgn0023023,FBgn0003206,FBgn0038504,FBgn0010348,FBgn0031633,FBgn0026181,FBgn0037093,FBgn0026056,FBgn0015789,FBgn0039140,FBgn0015402,FBgn0263782,FBgn0023172,FBgn0015513,FBgn0039532,FBgn0036846,FBgn0010341,FBgn0262866,FBgn0002567,FBgn0261556,FBgn0039966,FBgn0050372,FBgn0263706,FBgn0262562,FBgn0004638,FBgn0017581,FBgn0050158,FBgn0025802,FBgn0036980,FBgn0000097,FBgn0036257,FBg…
GO:0048285	organelle fission	biological_process	7.7749e-19	2.9433e-17	205	3767	397	12231	FBgn0004379,FBgn0001108,FBgn0004889,FBgn0011661,FBgn0034231,FBgn0032444,FBgn0030863,FBgn0004374,FBgn0015600,FBgn0004028,FBgn0013756,FBgn0032848,FBgn0262743,FBgn0040283,FBgn0000405,FBgn0030268,FBgn0003165,FBgn0035766,FBgn0000404,FBgn0265297,FBgn0026370,FBgn0260399,FBgn0000996,FBgn0003943,FBgn0037831,FBgn0029891,FBgn0003483,FBgn0001086,FBgn0011739,FBgn0005596,FBgn0035024,FBgn0035233,FBgn0263237,FBg…
GO:0019899	enzyme binding	molecular_function	8.4627e-19	3.1913e-17	122	3767	201	12231	FBgn0033917,FBgn0044823,FBgn0042177,FBgn0037826,FBgn0259483,FBgn0260635,FBgn0037894,FBgn0263979,FBgn0031456,FBgn0033061,FBgn0039966,FBgn0024921,FBgn0034314,FBgn0036428,FBgn0025802,FBgn0020224,FBgn0266572,FBgn0017581,FBgn0000183,FBgn0267378,FBgn0021818,FBgn0053526,FBgn0052685,FBgn0015321,FBgn0031745,FBgn0034585,FBgn0003862,FBgn0015509,FBgn0033845,FBgn0085443,FBgn0026056,FBgn0031549,FBgn0034708,FBg…
GO:0007067	mitotic nuclear division	biological_process	1.0249e-18	3.8501e-17	143	3767	249	12231	FBgn0003732,FBgn0003268,FBgn0260639,FBgn0004237,FBgn0010382,FBgn0030530,FBgn0031952,FBgn0021760,FBgn0030276,FBgn0004855,FBgn0023423,FBgn0011205,FBgn0031601,FBgn0263231,FBgn0023213,FBgn0035370,FBgn0030500,FBgn0034958,FBgn0015391,FBgn0264694,FBgn0012058,FBgn0023509,FBgn0259483,FBgn0000253,FBgn0002914,FBgn0035676,FBgn0264291,FBgn0015019,FBgn0260985,FBgn0040208,FBgn0061476,FBgn0038585,FBgn0035640,FBg…
GO:0070647	protein modification by small protein conjugation or removal	biological_process	1.0553e-18	3.9491e-17	146	3767	256	12231	FBgn0035233,FBgn0003943,FBgn0029891,FBgn0001086,FBgn0264922,FBgn0027052,FBgn0032467,FBgn0023097,FBgn0037659,FBgn0038686,FBgn0039214,FBgn0264493,FBgn0037781,FBgn0052350,FBgn0260936,FBgn0013756,FBgn0261268,FBgn0035983,FBgn0017418,FBgn0031450,FBgn0035953,FBgn0260794,FBgn0260866,FBgn0005632,FBgn0027512,FBgn0036516,FBgn0058045,FBgn0030863,FBgn0013717,FBgn0000173,FBgn0028476,FBgn0033738,FBgn0032214,FBg…
GO:0051960	regulation of nervous system development	biological_process	1.2452e-18	4.6419e-17	135	3767	231	12231	FBgn0005198,FBgn0036257,FBgn0032929,FBgn0030600,FBgn0014133,FBgn0003410,FBgn0039306,FBgn0028734,FBgn0003371,FBgn0263111,FBgn0041184,FBgn0034646,FBgn0261456,FBgn0004102,FBgn0053193,FBgn0005561,FBgn0264075,FBgn0000635,FBgn0264959,FBgn0032956,FBgn0003079,FBgn0003430,FBgn0002526,FBgn0259174,FBgn0034789,FBgn0002973,FBgn0261963,FBgn0037481,FBgn0261854,FBgn0010379,FBgn0026181,FBgn0000547,FBgn0015279,FBg…
GO:0009605	response to external stimulus	biological_process	1.2807e-18	4.756e-17	359	3767	799	12231	FBgn0000635,FBgn0261560,FBgn0086357,FBgn0039464,FBgn0261963,FBgn0020238,FBgn0011695,FBgn0010441,FBgn0003079,FBgn0002526,FBgn0038149,FBgn0004795,FBgn0008635,FBgn0000099,FBgn0037648,FBgn0264006,FBgn0035574,FBgn0085387,FBgn0087035,FBgn0036414,FBgn0010051,FBgn0086358,FBgn0028371,FBgn0032157,FBgn0005624,FBgn0260660,FBgn0250820,FBgn0005198,FBgn0035713,FBgn0261800,FBgn0052672,FBgn0004623,FBgn0016061,FBg…
GO:0040008	regulation of growth	biological_process	1.6291e-18	6.0272e-17	140	3767	243	12231	FBgn0024234,FBgn0020440,FBgn0039213,FBgn0034265,FBgn0039214,FBgn0267698,FBgn0261524,FBgn0011739,FBgn0003969,FBgn0011571,FBgn0037884,FBgn0039055,FBgn0001075,FBgn0024277,FBgn0021796,FBgn0038747,FBgn0003416,FBgn0000464,FBgn0013762,FBgn0003944,FBgn0259685,FBgn0266848,FBgn0038755,FBgn0015806,FBgn0003317,FBgn0010300,FBgn0264607,FBgn0000319,FBgn0003089,FBgn0011642,FBgn0041629,FBgn0046704,FBgn0039904,FBg…
GO:0005654	nucleoplasm	cellular_component	1.8859e-18	6.9508e-17	175	3767	326	12231	FBgn0011571,FBgn0026373,FBgn0263237,FBgn0038546,FBgn0262117,FBgn0031876,FBgn0000139,FBgn0025455,FBgn0034537,FBgn0262527,FBgn0011291,FBgn0031377,FBgn0022724,FBgn0037770,FBgn0032634,FBgn0262714,FBgn0020306,FBgn0023518,FBgn0040066,FBgn0020633,FBgn0030891,FBgn0037781,FBgn0039066,FBgn0026873,FBgn0261793,FBgn0030121,FBgn0259789,FBgn0259199,FBgn0039904,FBgn0039280,FBgn0003575,FBgn0023216,FBgn0038760,FBg…
GO:0048589	developmental growth	biological_process	1.9224e-18	7.0588e-17	165	3767	302	12231	FBgn0038980,FBgn0000017,FBgn0010575,FBgn0023172,FBgn0001122,FBgn0038197,FBgn0035533,FBgn0263598,FBgn0015789,FBgn0005536,FBgn0039632,FBgn0026181,FBgn0043900,FBgn0010379,FBgn0267791,FBgn0000504,FBgn0011701,FBgn0015279,FBgn0262735,FBgn0264975,FBgn0000547,FBgn0004360,FBgn0020493,FBgn0262733,FBgn0261985,FBgn0035590,FBgn0264326,FBgn0005640,FBgn0267350,FBgn0039861,FBgn0014029,FBgn0029840,FBgn0001332,FBg…
GO:0000280	nuclear division	biological_process	2.6735e-18	9.7799e-17	200	3767	388	12231	FBgn0000996,FBgn0026370,FBgn0260399,FBgn0265297,FBgn0035024,FBgn0035233,FBgn0005596,FBgn0011739,FBgn0003483,FBgn0001086,FBgn0003943,FBgn0037831,FBgn0015282,FBgn0263237,FBgn0011207,FBgn0004889,FBgn0001108,FBgn0004379,FBgn0015600,FBgn0004028,FBgn0004374,FBgn0030863,FBgn0011661,FBgn0032444,FBgn0034231,FBgn0040283,FBgn0030268,FBgn0000405,FBgn0013756,FBgn0032848,FBgn0262743,FBgn0000404,FBgn0003165,FBg…
GO:0001754	eye photoreceptor cell differentiation	biological_process	3.0051e-18	1.0952e-16	106	3767	168	12231	FBgn0004864,FBgn0027356,FBgn0014388,FBgn0016794,FBgn0040505,FBgn0003256,FBgn0013726,FBgn0016081,FBgn0005536,FBgn0035106,FBgn0015797,FBgn0027054,FBgn0039132,FBgn0004390,FBgn0023489,FBgn0003870,FBgn0267435,FBgn0004177,FBgn0040294,FBgn0000320,FBgn0004644,FBgn0044323,FBgn0261397,FBgn0002576,FBgn0005630,FBgn0000382,FBgn0001235,FBgn0261617,FBgn0010269,FBgn0004449,FBgn0265998,FBgn0034070,FBgn0266450,FBg…
GO:0061061	muscle structure development	biological_process	3.418e-18	1.241e-16	135	3767	233	12231	FBgn0024811,FBgn0263979,FBgn0000546,FBgn0001235,FBgn0004606,FBgn0261648,FBgn0250906,FBgn0033988,FBgn0000629,FBgn0000097,FBgn0036239,FBgn0020493,FBgn0004360,FBgn0030699,FBgn0035539,FBgn0262125,FBgn0025463,FBgn0264442,FBgn0032248,FBgn0000547,FBgn0040505,FBgn0016917,FBgn0016075,FBgn0010379,FBgn0265356,FBgn0010389,FBgn0038042,FBgn0015513,FBgn0038197,FBgn0002973,FBgn0086677,FBgn0002441,FBgn0011692,FBg…
GO:0044248	cellular catabolic process	biological_process	3.6198e-18	1.3094e-16	260	3767	541	12231	FBgn0001086,FBgn0003943,FBgn0035233,FBgn0034072,FBgn0261479,FBgn0011207,FBgn0035811,FBgn0033376,FBgn0004436,FBgn0029706,FBgn0037659,FBgn0028582,FBgn0039349,FBgn0039214,FBgn0260444,FBgn0022027,FBgn0036381,FBgn0051721,FBgn0003965,FBgn0010303,FBgn0028687,FBgn0003165,FBgn0260794,FBgn0033352,FBgn0037760,FBgn0017418,FBgn0028686,FBgn0003575,FBgn0020257,FBgn0033465,FBgn0021796,FBgn0003416,FBgn0025454,FBg…
GO:0001751	compound eye photoreceptor cell differentiation	biological_process	3.6818e-18	1.3269e-16	104	3767	164	12231	FBgn0086677,FBgn0011758,FBgn0001965,FBgn0001168,FBgn0046704,FBgn0263289,FBgn0264075,FBgn0001233,FBgn0003513,FBgn0003651,FBgn0259685,FBgn0041111,FBgn0024836,FBgn0011661,FBgn0000464,FBgn0001108,FBgn0033179,FBgn0264006,FBgn0259210,FBgn0027335,FBgn0003410,FBgn0043884,FBgn0015754,FBgn0266671,FBgn0032929,FBgn0025360,FBgn0000499,FBgn0027053,FBgn0025743,FBgn0011739,FBgn0028500,FBgn0261458,FBgn0035993,FBg…
GO:0048584	positive regulation of response to stimulus	biological_process	5.0927e-18	1.8287e-16	181	3767	343	12231	FBgn0000251,FBgn0024326,FBgn0040011,FBgn0011202,FBgn0086358,FBgn0032157,FBgn0043884,FBgn0025740,FBgn0011785,FBgn0020660,FBgn0261800,FBgn0260660,FBgn0050440,FBgn0031762,FBgn0261119,FBgn0036141,FBgn0037376,FBgn0261456,FBgn0259785,FBgn0263930,FBgn0034722,FBgn0022023,FBgn0260632,FBgn0261573,FBgn0005638,FBgn0003612,FBgn0003415,FBgn0086677,FBgn0020238,FBgn0067783,FBgn0037734,FBgn0001965,FBgn0003079,FBg…
GO:0044087	regulation of cellular component biogenesis	biological_process	5.1204e-18	1.8319e-16	125	3767	211	12231	FBgn0024329,FBgn0036257,FBgn0030600,FBgn0005198,FBgn0003483,FBgn0034921,FBgn0000499,FBgn0003495,FBgn0037884,FBgn0024277,FBgn0031781,FBgn0028734,FBgn0011764,FBgn0011571,FBgn0011202,FBgn0039213,FBgn0016034,FBgn0027509,FBgn0000163,FBgn0003371,FBgn0263111,FBgn0020440,FBgn0024234,FBgn0052380,FBgn0267698,FBgn0264272,FBgn0264598,FBgn0052350,FBgn0034646,FBgn0034265,FBgn0264959,FBgn0000635,FBgn0260934,FBg…
GO:0005886	plasma membrane	cellular_component	5.1631e-18	1.8393e-16	387	3767	881	12231	FBgn0036556,FBgn0000182,FBgn0001296,FBgn0263397,FBgn0010389,FBgn0030310,FBgn0013997,FBgn0031702,FBgn0010379,FBgn0032167,FBgn0016794,FBgn0052447,FBgn0040505,FBgn0039155,FBgn0000547,FBgn0002577,FBgn0027356,FBgn0264975,FBgn0015513,FBgn0265296,FBgn0004197,FBgn0039927,FBgn0024236,FBgn0250910,FBgn0264691,FBgn0035533,FBgn0026396,FBgn0010350,FBgn0263598,FBgn0020372,FBgn0262473,FBgn0024941,FBgn0050361,FBg…
GO:0022603	regulation of anatomical structure morphogenesis	biological_process	5.1787e-18	1.8393e-16	145	3767	257	12231	FBgn0020510,FBgn0003169,FBgn0262743,FBgn0003513,FBgn0003744,FBgn0046704,FBgn0024836,FBgn0011771,FBgn0000606,FBgn0030391,FBgn0000464,FBgn0034697,FBgn0086680,FBgn0030018,FBgn0019972,FBgn0024277,FBgn0025455,FBgn0000499,FBgn0029891,FBgn0011739,FBgn0025743,FBgn0015754,FBgn0027609,FBgn0030057,FBgn0267698,FBgn0003731,FBgn0020440,FBgn0027587,FBgn0265297,FBgn0020255,FBgn0045852,FBgn0002932,FBgn0013469,FBg…
GO:0010629	negative regulation of gene expression	biological_process	5.5571e-18	1.9665e-16	216	3767	430	12231	FBgn0261266,FBgn0260632,FBgn0261573,FBgn0262519,FBgn0001150,FBgn0261456,FBgn0004102,FBgn0086908,FBgn0037376,FBgn0025825,FBgn0001320,FBgn0037607,FBgn0013263,FBgn0017550,FBgn0022942,FBgn0261823,FBgn0003330,FBgn0265523,FBgn0017430,FBgn0032929,FBgn0005624,FBgn0030366,FBgn0000490,FBgn0028734,FBgn0026722,FBgn0003042,FBgn0263396,FBgn0005695,FBgn0015371,FBgn0001180,FBgn0000577,FBgn0004795,FBgn0086613,FBg…
GO:0070925	organelle assembly	biological_process	5.5956e-18	1.973e-16	135	3767	234	12231	FBgn0000253,FBgn0259483,FBgn0038294,FBgn0023509,FBgn0053094,FBgn0038916,FBgn0002873,FBgn0015019,FBgn0264291,FBgn0035676,FBgn0002914,FBgn0035370,FBgn0020261,FBgn0264694,FBgn0030500,FBgn0035295,FBgn0036641,FBgn0021760,FBgn0067317,FBgn0023423,FBgn0038170,FBgn0031255,FBgn0260639,FBgn0050441,FBgn0266053,FBgn0001250,FBgn0033845,FBgn0039335,FBgn0260987,FBgn0053208,FBgn0004419,FBgn0004380,FBgn0086906,FBg…
GO:0008092	cytoskeletal protein binding	molecular_function	7.1421e-18	2.5092e-16	157	3767	286	12231	FBgn0036309,FBgn0002121,FBgn0033212,FBgn0086906,FBgn0004380,FBgn0265434,FBgn0000578,FBgn0031985,FBgn0033845,FBgn0053208,FBgn0004169,FBgn0037836,FBgn0011225,FBgn0004387,FBgn0016920,FBgn0086442,FBgn0010434,FBgn0040208,FBgn0034577,FBgn0264694,FBgn0029688,FBgn0034282,FBgn0016070,FBgn0036372,FBgn0261788,FBgn0003392,FBgn0001301,FBgn0000253,FBgn0010415,FBgn0032859,FBgn0041781,FBgn0001202,FBgn0030530,FBg…
GO:0051246	regulation of protein metabolic process	biological_process	9.0761e-18	3.1773e-16	217	3767	434	12231	FBgn0264848,FBgn0028734,FBgn0263396,FBgn0024326,FBgn0052672,FBgn0262559,FBgn0061469,FBgn0040011,FBgn0259791,FBgn0032378,FBgn0041100,FBgn0017550,FBgn0028429,FBgn0027053,FBgn0261823,FBgn0260749,FBgn0005198,FBgn0000063,FBgn0261119,FBgn0262699,FBgn0259212,FBgn0015625,FBgn0000711,FBgn0261573,FBgn0003612,FBgn0063923,FBgn0003371,FBgn0034722,FBgn0020238,FBgn0086677,FBgn0264815,FBgn0028987,FBgn0003079,FBg…
GO:0033043	regulation of organelle organization	biological_process	1.1104e-17	3.8735e-16	146	3767	261	12231	FBgn0022361,FBgn0026326,FBgn0002183,FBgn0035533,FBgn0031437,FBgn0000017,FBgn0030082,FBgn0000114,FBgn0036964,FBgn0027339,FBgn0265193,FBgn0039227,FBgn0026181,FBgn0000547,FBgn0052654,FBgn0250823,FBgn0262125,FBgn0031549,FBgn0025463,FBgn0086657,FBgn0003475,FBgn0004367,FBgn0003520,FBgn0016756,FBgn0086362,FBgn0052707,FBgn0003525,FBgn0086359,FBgn0038369,FBgn0002924,FBgn0027948,FBgn0011606,FBgn0010341,FBg…
GO:0050808	synapse organization	biological_process	1.3344e-17	4.638e-16	118	3767	197	12231	FBgn0036257,FBgn0030600,FBgn0005586,FBgn0259246,FBgn0265416,FBgn0005198,FBgn0024277,FBgn0028734,FBgn0031006,FBgn0262527,FBgn0037884,FBgn0020386,FBgn0011571,FBgn0263968,FBgn0001125,FBgn0039213,FBgn0020440,FBgn0024234,FBgn0040281,FBgn0000163,FBgn0003371,FBgn0263111,FBgn0267698,FBgn0038816,FBgn0034646,FBgn0034265,FBgn0036376,FBgn0028500,FBgn0032956,FBgn0004009,FBgn0264959,FBgn0260934,FBgn0000635,FBg…
GO:0044770	cell cycle phase transition	biological_process	1.751e-17	6.0646e-16	101	3767	160	12231	FBgn0028837,FBgn0027055,FBgn0031952,FBgn0004855,FBgn0002783,FBgn0052707,FBgn0003525,FBgn0023213,FBgn0011648,FBgn0015509,FBgn0003732,FBgn0036239,FBgn0003268,FBgn0004367,FBgn0261437,FBgn0010382,FBgn0033354,FBgn0037263,FBgn0002914,FBgn0040273,FBgn0004106,FBgn0041171,FBgn0015799,FBgn0010314,FBgn0003139,FBgn0040078,FBgn0039403,FBgn0002901,FBgn0086359,FBgn0031885,FBgn0000114,FBgn0061476,FBgn0026326,FBg…
GO:0044772	mitotic cell cycle phase transition	biological_process	2.143e-17	7.3959e-16	99	3767	156	12231	FBgn0027054,FBgn0004419,FBgn0002878,FBgn0000064,FBgn0031549,FBgn0044324,FBgn0003884,FBgn0010173,FBgn0035194,FBgn0050342,FBgn0038578,FBgn0035640,FBgn0261278,FBgn0010316,FBgn0041191,FBgn0031885,FBgn0000114,FBgn0061476,FBgn0026326,FBgn0040273,FBgn0002914,FBgn0004106,FBgn0041171,FBgn0015799,FBgn0039403,FBgn0040078,FBgn0002901,FBgn0086359,FBgn0010314,FBgn0003139,FBgn0023213,FBgn0011648,FBgn0027055,FBg…
GO:0007267	cell-cell signaling	biological_process	2.4342e-17	8.3715e-16	237	3767	488	12231	FBgn0020429,FBgn0029709,FBgn0086784,FBgn0265416,FBgn0000499,FBgn0262782,FBgn0025743,FBgn0004913,FBgn0029891,FBgn0034072,FBgn0005586,FBgn0033886,FBgn0004179,FBgn0267488,FBgn0031461,FBgn0053653,FBgn0011708,FBgn0053547,FBgn0024277,FBgn0027575,FBgn0036696,FBgn0027363,FBgn0265297,FBgn0266579,FBgn0000541,FBgn0024234,FBgn0028582,FBgn0039909,FBgn0030341,FBgn0003380,FBgn0000115,FBgn0030057,FBgn0264493,FBg…
GO:0045786	negative regulation of cell cycle	biological_process	2.5801e-17	8.8422e-16	89	3767	135	12231	FBgn0262519,FBgn0267351,FBgn0003612,FBgn0003731,FBgn0000541,FBgn0027338,FBgn0262699,FBgn0000063,FBgn0038016,FBgn0033897,FBgn0040066,FBgn0020633,FBgn0026143,FBgn0015754,FBgn0261850,FBgn0011785,FBgn0001086,FBgn0052251,FBgn0027053,FBgn0017550,FBgn0262527,FBgn0003277,FBgn0000212,FBgn0264848,FBgn0011708,FBgn0000137,FBgn0039858,FBgn0000351,FBgn0020270,FBgn0038827,FBgn0040347,FBgn0004009,FBgn0085436,FBg…
GO:0010564	regulation of cell cycle process	biological_process	2.9892e-17	1.0208e-15	116	3767	194	12231	FBgn0052707,FBgn0003525,FBgn0002783,FBgn0023423,FBgn0004855,FBgn0031952,FBgn0021760,FBgn0028837,FBgn0027055,FBgn0011648,FBgn0023213,FBgn0004367,FBgn0036239,FBgn0003732,FBgn0003268,FBgn0015509,FBgn0002466,FBgn0037263,FBgn0003023,FBgn0261437,FBgn0033354,FBgn0010382,FBgn0015799,FBgn0041171,FBgn0004106,FBgn0040273,FBgn0002914,FBgn0261617,FBgn0011606,FBgn0010314,FBgn0086359,FBgn0002901,FBgn0039403,FBg…
GO:0045595	regulation of cell differentiation	biological_process	3.3305e-17	1.1334e-15	142	3767	254	12231	FBgn0263864,FBgn0262127,FBgn0004177,FBgn0000114,FBgn0261397,FBgn0023172,FBgn0004197,FBgn0000147,FBgn0040505,FBgn0015279,FBgn0000547,FBgn0026181,FBgn0010348,FBgn0010379,FBgn0005536,FBgn0034975,FBgn0028387,FBgn0250823,FBgn0262125,FBgn0266717,FBgn0003124,FBgn0003520,FBgn0031005,FBgn0004638,FBgn0011217,FBgn0000097,FBgn0001624,FBgn0032006,FBgn0262866,FBgn0261108,FBgn0001235,FBgn0010341,FBgn0261648,FBg…
GO:0023056	positive regulation of signaling	biological_process	3.7793e-17	1.2817e-15	144	3767	259	12231	FBgn0010269,FBgn0263933,FBgn0262516,FBgn0014006,FBgn0003984,FBgn0030051,FBgn0003392,FBgn0004514,FBgn0259483,FBgn0260635,FBgn0052479,FBgn0027567,FBgn0002932,FBgn0004635,FBgn0267002,FBgn0003310,FBgn0021818,FBgn0037573,FBgn0023423,FBgn0020496,FBgn0000183,FBgn0023091,FBgn0264606,FBgn0041191,FBgn0003256,FBgn0261279,FBgn0025836,FBgn0040022,FBgn0265048,FBgn0011300,FBgn0038862,FBgn0038984,FBgn0026323,FBg…
GO:0090066	regulation of anatomical structure size	biological_process	5.4597e-17	1.8452e-15	107	3767	175	12231	FBgn0015806,FBgn0021814,FBgn0024836,FBgn0041111,FBgn0026317,FBgn0000083,FBgn0000464,FBgn0261269,FBgn0028969,FBgn0027581,FBgn0038747,FBgn0021796,FBgn0035411,FBgn0039709,FBgn0028968,FBgn0000635,FBgn0046704,FBgn0004009,FBgn0037491,FBgn0037874,FBgn0267390,FBgn0264560,FBgn0003502,FBgn0000319,FBgn0261560,FBgn0032421,FBgn0052380,FBgn0001320,FBgn0264598,FBgn0001321,FBgn0264272,FBgn0036368,FBgn0010238,FBg…
GO:0032879	regulation of localization	biological_process	5.9167e-17	1.9927e-15	152	3767	279	12231	FBgn0261397,FBgn0000017,FBgn0038197,FBgn0010350,FBgn0003210,FBgn0034540,FBgn0000352,FBgn0035504,FBgn0262125,FBgn0250823,FBgn0036740,FBgn0263397,FBgn0031842,FBgn0029174,FBgn0052654,FBgn0010348,FBgn0010379,FBgn0001079,FBgn0029818,FBgn0026207,FBgn0032052,FBgn0039747,FBgn0037015,FBgn0003520,FBgn0261385,FBgn0037766,FBgn0038065,FBgn0004875,FBgn0004838,FBgn0265174,FBgn0261014,FBgn0004106,FBgn0010660,FBg…
GO:0006909	phagocytosis	biological_process	6.0832e-17	2.0417e-15	129	3767	225	12231	FBgn0039056,FBgn0028968,FBgn0029504,FBgn0036710,FBgn0264959,FBgn0053554,FBgn0264560,FBgn0024555,FBgn0000047,FBgn0008635,FBgn0028341,FBgn0027581,FBgn0036939,FBgn0032409,FBgn0029980,FBgn0031781,FBgn0263603,FBgn0036500,FBgn0040475,FBgn0030612,FBgn0003507,FBgn0036875,FBgn0260658,FBgn0001208,FBgn0038855,FBgn0265523,FBgn0005198,FBgn0011785,FBgn0003499,FBgn0036180,FBgn0030114,FBgn0035993,FBgn0001150,FBg…
GO:0016772	transferase activity, transferring phosphorus-containing groups	molecular_function	7.4648e-17	2.4969e-15	246	3767	515	12231	FBgn0031657,FBgn0016696,FBgn0010379,FBgn0026181,FBgn0010389,FBgn0261278,FBgn0040505,FBgn0015279,FBgn0030864,FBgn0003124,FBgn0038630,FBgn0250823,FBgn0034141,FBgn0037093,FBgn0086657,FBgn0086899,FBgn0036742,FBgn0000826,FBgn0053116,FBgn0015402,FBgn0010350,FBgn0052666,FBgn0000147,FBgn0000017,FBgn0261873,FBgn0001186,FBgn0027889,FBgn0020389,FBgn0267350,FBgn0035392,FBgn0250906,FBgn0035436,FBgn0262866,FBg…
GO:0031981	nuclear lumen	cellular_component	7.8123e-17	2.6042e-15	249	3767	523	12231	FBgn0032634,FBgn0262714,FBgn0020306,FBgn0037770,FBgn0010926,FBgn0025455,FBgn0264922,FBgn0011291,FBgn0262527,FBgn0034537,FBgn0025639,FBgn0030877,FBgn0026196,FBgn0031377,FBgn0022724,FBgn0011571,FBgn0026373,FBgn0038546,FBgn0263237,FBgn0262117,FBgn0000139,FBgn0031876,FBgn0004858,FBgn0259789,FBgn0000996,FBgn0259199,FBgn0023097,FBgn0261793,FBgn0034065,FBgn0030121,FBgn0028744,FBgn0037781,FBgn0026873,FBg…
GO:0007265	Ras protein signal transduction	biological_process	8.5565e-17	2.8426e-15	108	3767	178	12231	FBgn0003206,FBgn0086901,FBgn0015372,FBgn0023023,FBgn0016794,FBgn0031118,FBgn0014388,FBgn0038504,FBgn0026181,FBgn0031633,FBgn0010348,FBgn0003256,FBgn0020655,FBgn0086356,FBgn0025836,FBgn0037093,FBgn0015797,FBgn0026056,FBgn0085443,FBgn0003041,FBgn0085447,FBgn0015789,FBgn0004390,FBgn0015402,FBgn0010909,FBgn0263782,FBgn0044323,FBgn0035437,FBgn0023172,FBgn0032388,FBgn0010269,FBgn0262866,FBgn0036846,FBg…
GO:0030855	epithelial cell differentiation	biological_process	8.7562e-17	2.899e-15	182	3767	353	12231	FBgn0039955,FBgn0004859,FBgn0263929,FBgn0024234,FBgn0003731,FBgn0003118,FBgn0016034,FBgn0000996,FBgn0030018,FBgn0264922,FBgn0001075,FBgn0052642,FBgn0000499,FBgn0011766,FBgn0001083,FBgn0011739,FBgn0003483,FBgn0043903,FBgn0029906,FBgn0015754,FBgn0031304,FBgn0259685,FBgn0004374,FBgn0003317,FBgn0015600,FBgn0003053,FBgn0003416,FBgn0001108,FBgn0033846,FBgn0266521,FBgn0010303,FBgn0026238,FBgn0000250,FBg…
GO:0015630	microtubule cytoskeleton	cellular_component	9.1901e-17	3.0324e-15	238	3767	495	12231	FBgn0041775,FBgn0026378,FBgn0026431,FBgn0010235,FBgn0026326,FBgn0000352,FBgn0026141,FBgn0025874,FBgn0004177,FBgn0040207,FBgn0036735,FBgn0061200,FBgn0000147,FBgn0032243,FBgn0013813,FBgn0039302,FBgn0003950,FBgn0013726,FBgn0004926,FBgn0011020,FBgn0030871,FBgn0031657,FBgn0040064,FBgn0031549,FBgn0003124,FBgn0003520,FBgn0027580,FBgn0027500,FBgn0003862,FBgn0028685,FBgn0259140,FBgn0003261,FBgn0031769,FBg…
GO:1902580	single-organism cellular localization	biological_process	1.505e-16	4.9494e-15	199	3767	397	12231	FBgn0037573,FBgn0023423,FBgn0000183,FBgn0021760,FBgn0000482,FBgn0267002,FBgn0030505,FBgn0086372,FBgn0000562,FBgn0010747,FBgn0003310,FBgn0031145,FBgn0003392,FBgn0000253,FBgn0002873,FBgn0053094,FBgn0010380,FBgn0041585,FBgn0038167,FBgn0030500,FBgn0024921,FBgn0040340,FBgn0016041,FBgn0004644,FBgn0034691,FBgn0010434,FBgn0266757,FBgn0011225,FBgn0033264,FBgn0036928,FBgn0266669,FBgn0022213,FBgn0266756,FBg…
GO:0003824	catalytic activity	molecular_function	1.6184e-16	5.3044e-15	1463	3767	4117	12231	FBgn0036287,FBgn0037391,FBgn0011217,FBgn0004581,FBgn0004407,FBgn0052707,FBgn0027572,FBgn0034546,FBgn0003082,FBgn0027580,FBgn0001565,FBgn0034988,FBgn0004367,FBgn0020621,FBgn0036239,FBgn0025742,FBgn0025936,FBgn0041171,FBgn0030011,FBgn0263599,FBgn0263979,FBgn0040309,FBgn0004507,FBgn0040078,FBgn0034314,FBgn0037873,FBgn0028970,FBgn0030687,FBgn0266918,FBgn0014007,FBgn0035888,FBgn0000017,FBgn0033226,FBg…
GO:1901987	regulation of cell cycle phase transition	biological_process	1.6816e-16	5.4747e-15	91	3767	142	12231	FBgn0010314,FBgn0086359,FBgn0002901,FBgn0039403,FBgn0040078,FBgn0015799,FBgn0041171,FBgn0004106,FBgn0002914,FBgn0040273,FBgn0004367,FBgn0003732,FBgn0003268,FBgn0036239,FBgn0015509,FBgn0037263,FBgn0033354,FBgn0261437,FBgn0010382,FBgn0052707,FBgn0002783,FBgn0004855,FBgn0027055,FBgn0028837,FBgn0031952,FBgn0011648,FBgn0023213,FBgn0010316,FBgn0261278,FBgn0035640,FBgn0050342,FBgn0038578,FBgn0035194,FBg…
GO:1901990	regulation of mitotic cell cycle phase transition	biological_process	1.6816e-16	5.4747e-15	91	3767	142	12231	FBgn0061476,FBgn0031885,FBgn0000114,FBgn0026326,FBgn0044324,FBgn0031549,FBgn0003884,FBgn0000064,FBgn0002878,FBgn0027054,FBgn0004419,FBgn0261278,FBgn0010316,FBgn0035640,FBgn0035194,FBgn0050342,FBgn0038578,FBgn0010173,FBgn0002783,FBgn0052707,FBgn0031952,FBgn0027055,FBgn0028837,FBgn0004855,FBgn0023213,FBgn0011648,FBgn0003268,FBgn0036239,FBgn0003732,FBgn0004367,FBgn0015509,FBgn0037263,FBgn0261437,FBg…
GO:0007017	microtubule-based process	biological_process	2.0771e-16	6.7399e-15	250	3767	529	12231	FBgn0267390,FBgn0000405,FBgn0030268,FBgn0000319,FBgn0000273,FBgn0001308,FBgn0013756,FBgn0023177,FBgn0259099,FBgn0086690,FBgn0033447,FBgn0027066,FBgn0266521,FBgn0031575,FBgn0265574,FBgn0035766,FBgn0013812,FBgn0004889,FBgn0001108,FBgn0263197,FBgn0004379,FBgn0040080,FBgn0015600,FBgn0004374,FBgn0032444,FBgn0011661,FBgn0029969,FBgn0032446,FBgn0013718,FBgn0035581,FBgn0027655,FBgn0262714,FBgn0015754,FBg…
GO:0009967	positive regulation of signal transduction	biological_process	2.9368e-16	9.4979e-15	134	3767	240	12231	FBgn0032388,FBgn0086346,FBgn0004644,FBgn0035437,FBgn0044323,FBgn0026323,FBgn0010909,FBgn0038862,FBgn0040022,FBgn0265048,FBgn0011300,FBgn0003256,FBgn0025836,FBgn0261279,FBgn0041191,FBgn0023423,FBgn0037573,FBgn0020496,FBgn0003310,FBgn0021818,FBgn0004635,FBgn0027567,FBgn0002932,FBgn0052479,FBgn0030051,FBgn0259483,FBgn0260635,FBgn0003392,FBgn0004514,FBgn0014006,FBgn0003984,FBgn0010269,FBgn0263933,FBg…
GO:0035282	segmentation	biological_process	3.3639e-16	1.0843e-14	136	3767	245	12231	FBgn0039907,FBgn0027535,FBgn0016034,FBgn0263102,FBgn0003118,FBgn0003731,FBgn0037659,FBgn0004859,FBgn0014143,FBgn0001321,FBgn0043903,FBgn0034072,FBgn0034921,FBgn0003483,FBgn0000499,FBgn0032340,FBgn0261524,FBgn0011764,FBgn0086680,FBgn0003944,FBgn0003053,FBgn0000606,FBgn0001325,FBgn0003317,FBgn0041111,FBgn0024836,FBgn0011661,FBgn0024371,FBgn0004893,FBgn0003513,FBgn0001308,FBgn0000319,FBgn0000273,FBg…
GO:1902582	single-organism intracellular transport	biological_process	3.8988e-16	1.2526e-14	221	3767	456	12231	FBgn0027868,FBgn0003360,FBgn0259152,FBgn0032446,FBgn0052250,FBgn0033339,FBgn0028969,FBgn0015622,FBgn0001108,FBgn0021796,FBgn0263977,FBgn0031450,FBgn0033447,FBgn0000250,FBgn0260743,FBgn0266521,FBgn0267390,FBgn0022027,FBgn0037299,FBgn0261983,FBgn0262743,FBgn0001308,FBgn0013756,FBgn0015298,FBgn0027610,FBgn0264493,FBgn0030872,FBgn0052350,FBgn0030341,FBgn0033075,FBgn0000115,FBgn0261836,FBgn0028582,FBg…
GO:0010647	positive regulation of cell communication	biological_process	4.3543e-16	1.3944e-14	145	3767	267	12231	FBgn0262169,FBgn0020306,FBgn0024329,FBgn0020429,FBgn0029709,FBgn0261524,FBgn0025743,FBgn0036316,FBgn0264922,FBgn0031461,FBgn0000212,FBgn0024277,FBgn0030018,FBgn0010433,FBgn0028582,FBgn0037255,FBgn0039907,FBgn0027363,FBgn0000541,FBgn0264493,FBgn0264598,FBgn0030341,FBgn0035469,FBgn0030057,FBgn0003390,FBgn0260742,FBgn0000319,FBgn0011573,FBgn0031450,FBgn0035986,FBgn0011586,FBgn0039566,FBgn0010303,FBg…
GO:0051674	localization of cell	biological_process	4.3707e-16	1.395e-14	150	3767	279	12231	FBgn0000115,FBgn0003118,FBgn0028573,FBgn0003731,FBgn0027363,FBgn0263929,FBgn0261836,FBgn0016078,FBgn0010452,FBgn0085407,FBgn0011739,FBgn0003483,FBgn0000499,FBgn0015754,FBgn0043903,FBgn0011592,FBgn0011771,FBgn0013717,FBgn0031304,FBgn0011723,FBgn0022764,FBgn0033846,FBgn0005632,FBgn0003416,FBgn0010303,FBgn0025373,FBgn0266521,FBgn0003165,FBgn0086690,FBgn0031450,FBgn0267390,FBgn0083946,FBgn0259984,FBg…
GO:0007167	enzyme linked receptor protein signaling pathway	biological_process	4.7453e-16	1.5097e-14	131	3767	234	12231	FBgn0085407,FBgn0000212,FBgn0015296,FBgn0031461,FBgn0015754,FBgn0262169,FBgn0039914,FBgn0261524,FBgn0263593,FBgn0034265,FBgn0001321,FBgn0020248,FBgn0027535,FBgn0010433,FBgn0024234,FBgn0003731,FBgn0020440,FBgn0003118,FBgn0027363,FBgn0011573,FBgn0031450,FBgn0033081,FBgn0003169,FBgn0261885,FBgn0000395,FBgn0003165,FBgn0002552,FBgn0022027,FBgn0003317,FBgn0027868,FBgn0038755,FBgn0053531,FBgn0015399,FBg…
GO:0044710	single-organism metabolic process	biological_process	4.9446e-16	1.568e-14	750	3767	1947	12231	FBgn0034364,FBgn0039924,FBgn0001989,FBgn0005655,FBgn0030512,FBgn0262559,FBgn0024326,FBgn0010100,FBgn0261850,FBgn0036490,FBgn0051674,FBgn0264078,FBgn0266452,FBgn0036994,FBgn0039486,FBgn0086712,FBgn0025815,FBgn0086677,FBgn0032881,FBgn0039875,FBgn0020764,FBgn0053145,FBgn0020653,FBgn0264959,FBgn0037874,FBgn0024227,FBgn0015553,FBgn0030289,FBgn0020236,FBgn0011693,FBgn0030239,FBgn0027375,FBgn0036328,FBg…
GO:0016071	mRNA metabolic process	biological_process	5.284e-16	1.6702e-14	165	3767	316	12231	FBgn0029133,FBgn0039260,FBgn0035110,FBgn0035253,FBgn0005411,FBgn0035162,FBgn0050122,FBgn0036570,FBgn0261872,FBgn0260944,FBgn0031114,FBgn0036450,FBgn0005649,FBgn0017457,FBgn0005648,FBgn0039867,FBgn0038927,FBgn0033400,FBgn0001491,FBgn0001179,FBgn0085436,FBgn0034109,FBgn0029941,FBgn0026086,FBgn0000615,FBgn0261119,FBgn0039488,FBgn0261984,FBgn0019890,FBgn0037737,FBgn0260632,FBgn0263396,FBgn0263603,FBg…
GO:0043233	organelle lumen	cellular_component	5.6833e-16	1.7848e-14	308	3767	687	12231	FBgn0038578,FBgn0040339,FBgn0031036,FBgn0034975,FBgn0027616,FBgn0264785,FBgn0032248,FBgn0014037,FBgn0000581,FBgn0261383,FBgn0036328,FBgn0026326,FBgn0261109,FBgn0030082,FBgn0039559,FBgn0061200,FBgn0015621,FBgn0037138,FBgn0261617,FBgn0002622,FBgn0036927,FBgn0011787,FBgn0005616,FBgn0265003,FBgn0039218,FBgn0035149,FBgn0263863,FBgn0035374,FBgn0015828,FBgn0031851,FBgn0033842,FBgn0085451,FBgn0000629,FBg…
GO:0070013	intracellular organelle lumen	cellular_component	5.6833e-16	1.7848e-14	308	3767	687	12231	FBgn0024909,FBgn0019957,FBgn0040020,FBgn0026679,FBgn0261955,FBgn0019949,FBgn0035624,FBgn0033265,FBgn0037327,FBgn0010356,FBgn0010280,FBgn0027291,FBgn0053554,FBgn0001179,FBgn0035851,FBgn0039867,FBgn0036135,FBgn0027378,FBgn0034939,FBgn0032408,FBgn0267351,FBgn0003415,FBgn0026401,FBgn0017577,FBgn0029861,FBgn0032030,FBgn0033897,FBgn0038016,FBgn0266711,FBgn0010417,FBgn0000063,FBgn0037371,FBgn0027053,FBg…
GO:0071822	protein complex subunit organization	biological_process	5.8251e-16	1.8235e-14	280	3767	612	12231	FBgn0026181,FBgn0039680,FBgn0030871,FBgn0000547,FBgn0002577,FBgn0266917,FBgn0033210,FBgn0052654,FBgn0034975,FBgn0262125,FBgn0004177,FBgn0035533,FBgn0039140,FBgn0026431,FBgn0061200,FBgn0022344,FBgn0003447,FBgn0031437,FBgn0015288,FBgn0037777,FBgn0266719,FBgn0267350,FBgn0038369,FBgn0086359,FBgn0039532,FBgn0027948,FBgn0011606,FBgn0015589,FBgn0010660,FBgn0031455,FBgn0267378,FBgn0261618,FBgn0029117,FBg…
GO:0006366	transcription from RNA polymerase II promoter	biological_process	6.2628e-16	1.9543e-14	237	3767	499	12231	FBgn0010280,FBgn0003720,FBgn0264075,FBgn0010356,FBgn0001233,FBgn0004009,FBgn0045759,FBgn0035851,FBgn0001179,FBgn0033052,FBgn0004837,FBgn0001965,FBgn0029504,FBgn0020309,FBgn0011836,FBgn0003430,FBgn0003867,FBgn0003079,FBgn0001168,FBgn0002441,FBgn0261963,FBgn0000099,FBgn0024909,FBgn0015371,FBgn0004510,FBgn0039337,FBgn0021872,FBgn0040020,FBgn0019949,FBgn0004795,FBgn0000577,FBgn0001180,FBgn0031016,FBg…
GO:0033554	cellular response to stress	biological_process	6.601e-16	2.0532e-14	240	3767	507	12231	FBgn0040347,FBgn0037327,FBgn0024555,FBgn0000257,FBgn0037705,FBgn0005614,FBgn0026317,FBgn0037481,FBgn0036994,FBgn0035484,FBgn0038074,FBgn0039858,FBgn0021872,FBgn0086712,FBgn0037648,FBgn0020270,FBgn0034240,FBgn0020238,FBgn0002906,FBgn0033260,FBgn0004066,FBgn0029504,FBgn0027057,FBgn0039875,FBgn0003079,FBgn0039710,FBgn0020653,FBgn0085436,FBgn0001179,FBgn0033052,FBgn0264959,FBgn0015615,FBgn0001197,FBg…
GO:0044451	nucleoplasm part	cellular_component	7.6933e-16	2.3854e-14	156	3767	295	12231	FBgn0026373,FBgn0011571,FBgn0031876,FBgn0000139,FBgn0263237,FBgn0038546,FBgn0262117,FBgn0011291,FBgn0262527,FBgn0034537,FBgn0025455,FBgn0022724,FBgn0031377,FBgn0037770,FBgn0020306,FBgn0262714,FBgn0032634,FBgn0040066,FBgn0023518,FBgn0020633,FBgn0030891,FBgn0039066,FBgn0026873,FBgn0037781,FBgn0261793,FBgn0030121,FBgn0259199,FBgn0039904,FBgn0039280,FBgn0038760,FBgn0002775,FBgn0085444,FBgn0013717,FBg…
GO:0016477	cell migration	biological_process	8.4856e-16	2.6228e-14	141	3767	259	12231	FBgn0010269,FBgn0000382,FBgn0003984,FBgn0016797,FBgn0004657,FBgn0026630,FBgn0020299,FBgn0260635,FBgn0010415,FBgn0001301,FBgn0003392,FBgn0039338,FBgn0259176,FBgn0026192,FBgn0041781,FBgn0001250,FBgn0021760,FBgn0023423,FBgn0040068,FBgn0020224,FBgn0003254,FBgn0000014,FBgn0011648,FBgn0000482,FBgn0086901,FBgn0004864,FBgn0005659,FBgn0027505,FBgn0085443,FBgn0003041,FBgn0000578,FBgn0265434,FBgn0000221,FBg…
GO:0048870	cell motility	biological_process	8.5192e-16	2.6248e-14	146	3767	271	12231	FBgn0031450,FBgn0086690,FBgn0003165,FBgn0010303,FBgn0266521,FBgn0025373,FBgn0267390,FBgn0013717,FBgn0011771,FBgn0011723,FBgn0031304,FBgn0003416,FBgn0005632,FBgn0033846,FBgn0022764,FBgn0016078,FBgn0010452,FBgn0085407,FBgn0011592,FBgn0015754,FBgn0043903,FBgn0011739,FBgn0000499,FBgn0000115,FBgn0261836,FBgn0027363,FBgn0028573,FBgn0003118,FBgn0003731,FBgn0010415,FBgn0260635,FBgn0001301,FBgn0003392,FBg…
GO:0032268	regulation of cellular protein metabolic process	biological_process	8.7638e-16	2.6917e-14	202	3767	410	12231	FBgn0041191,FBgn0010316,FBgn0087039,FBgn0035640,FBgn0003256,FBgn0011666,FBgn0002121,FBgn0040227,FBgn0003884,FBgn0016081,FBgn0044324,FBgn0041707,FBgn0033029,FBgn0027054,FBgn0011300,FBgn0261786,FBgn0259243,FBgn0011474,FBgn0010909,FBgn0037816,FBgn0026323,FBgn0015075,FBgn0061476,FBgn0004644,FBgn0044323,FBgn0031047,FBgn0035437,FBgn0040038,FBgn0086346,FBgn0022382,FBgn0013987,FBgn0032388,FBgn0263667,FBg…
GO:0004674	protein serine/threonine kinase activity	molecular_function	9.3287e-16	2.8562e-14	114	3767	196	12231	FBgn0038603,FBgn0027497,FBgn0001079,FBgn0017581,FBgn0045980,FBgn0024222,FBgn0027101,FBgn0020621,FBgn0004367,FBgn0002466,FBgn0023169,FBgn0264492,FBgn0004106,FBgn0005640,FBgn0015024,FBgn0035590,FBgn0260935,FBgn0014006,FBgn0262866,FBgn0010314,FBgn0010269,FBgn0038167,FBgn0265998,FBgn0259168,FBgn0000147,FBgn0052666,FBgn0013987,FBgn0027889,FBgn0025625,FBgn0033915,FBgn0031855,FBgn0010909,FBgn0026323,FBg…
GO:0031974	membrane-enclosed lumen	cellular_component	1.0501e-15	3.2052e-14	310	3767	695	12231	FBgn0085444,FBgn0013717,FBgn0002775,FBgn0028982,FBgn0017558,FBgn0022764,FBgn0039993,FBgn0035766,FBgn0030789,FBgn0013756,FBgn0038269,FBgn0023216,FBgn0039555,FBgn0004856,FBgn0029718,FBgn0031824,FBgn0039877,FBgn0042083,FBgn0020633,FBgn0260936,FBgn0023518,FBgn0040066,FBgn0028744,FBgn0037781,FBgn0026873,FBgn0036334,FBgn0034065,FBgn0051075,FBgn0038546,FBgn0031876,FBgn0011571,FBgn0026373,FBgn0022724,FBg…
GO:0008283	cell proliferation	biological_process	1.1519e-15	3.5047e-14	167	3767	323	12231	FBgn0000114,FBgn0024510,FBgn0004197,FBgn0032725,FBgn0031799,FBgn0038197,FBgn0262127,FBgn0004177,FBgn0014018,FBgn0039632,FBgn0034975,FBgn0036740,FBgn0003124,FBgn0267791,FBgn0032614,FBgn0016917,FBgn0020278,FBgn0015279,FBgn0030309,FBgn0010389,FBgn0262739,FBgn0028426,FBgn0010379,FBgn0004882,FBgn0003525,FBgn0005771,FBgn0263995,FBgn0086695,FBgn0003520,FBgn0003023,FBgn0261451,FBgn0262473,FBgn0004875,FBg…
GO:0009056	catabolic process	biological_process	1.3532e-15	4.1046e-14	300	3767	669	12231	FBgn0015279,FBgn0034166,FBgn0032358,FBgn0039632,FBgn0263864,FBgn0029819,FBgn0038197,FBgn0250907,FBgn0086687,FBgn0250862,FBgn0031813,FBgn0030884,FBgn0001186,FBgn0033486,FBgn0015283,FBgn0033901,FBgn0262166,FBgn0010314,FBgn0004507,FBgn0250906,FBgn0032296,FBgn0039348,FBgn0029006,FBgn0261014,FBgn0040309,FBgn0015024,FBgn0000546,FBgn0028690,FBgn0034763,FBgn0041171,FBgn0034988,FBgn0004367,FBgn0036239,FBg…
GO:0051056	regulation of small GTPase mediated signal transduction	biological_process	1.7637e-15	5.333e-14	79	3767	120	12231	FBgn0003969,FBgn0005198,FBgn0025740,FBgn0265082,FBgn0050440,FBgn0264922,FBgn0024277,FBgn0261570,FBgn0040011,FBgn0031216,FBgn0037255,FBgn0264895,FBgn0031762,FBgn0026179,FBgn0261119,FBgn0028500,FBgn0264598,FBgn0035761,FBgn0259228,FBgn0053519,FBgn0264560,FBgn0028538,FBgn0265597,FBgn0085437,FBgn0020238,FBgn0011573,FBgn0001965,FBgn0037116,FBgn0003079,FBgn0035802,FBgn0039566,FBgn0032796,FBgn0264707,FBg…
GO:0006886	intracellular protein transport	biological_process	3.468e-15	1.0454e-13	140	3767	260	12231	FBgn0029789,FBgn0010434,FBgn0040340,FBgn0004644,FBgn0016041,FBgn0036974,FBgn0033264,FBgn0031536,FBgn0266756,FBgn0036928,FBgn0020497,FBgn0022213,FBgn0001087,FBgn0025725,FBgn0031078,FBgn0038810,FBgn0051229,FBgn0039132,FBgn0002566,FBgn0004864,FBgn0263198,FBgn0016975,FBgn0039110,FBgn0052758,FBgn0029830,FBgn0023423,FBgn0266572,FBgn0000482,FBgn0031534,FBgn0010747,FBgn0003310,FBgn0053526,FBgn0031145,FBg…
GO:0045930	negative regulation of mitotic cell cycle	biological_process	4.6537e-15	1.3985e-13	75	3767	113	12231	FBgn0040347,FBgn0039858,FBgn0020270,FBgn0038827,FBgn0020238,FBgn0033260,FBgn0000404,FBgn0029504,FBgn0027057,FBgn0001965,FBgn0039710,FBgn0085436,FBgn0011737,FBgn0024371,FBgn0037874,FBgn0045035,FBgn0013756,FBgn0027338,FBgn0000063,FBgn0038016,FBgn0040066,FBgn0033897,FBgn0020633,FBgn0267351,FBgn0003612,FBgn0000541,FBgn0003731,FBgn0262527,FBgn0003277,FBgn0000212,FBgn0011708,FBgn0000137,FBgn0026143,FBg…
GO:0009057	macromolecule catabolic process	biological_process	4.731e-15	1.4174e-13	181	3767	362	12231	FBgn0000351,FBgn0030809,FBgn0036994,FBgn0021814,FBgn0031868,FBgn0026415,FBgn0037236,FBgn0039260,FBgn0029133,FBgn0026371,FBgn0028691,FBgn0032956,FBgn0085436,FBgn0039875,FBgn0033260,FBgn0004066,FBgn0016038,FBgn0259174,FBgn0005648,FBgn0003612,FBgn0030966,FBgn0034618,FBgn0267351,FBgn0003371,FBgn0050382,FBgn0261984,FBgn0019890,FBgn0035094,FBgn0266711,FBgn0039402,FBgn0000063,FBgn0036897,FBgn0029512,FBg…
GO:0006950	response to stress	biological_process	5.3681e-15	1.6034e-13	429	3767	1032	12231	FBgn0000064,FBgn0014018,FBgn0011828,FBgn0016926,FBgn0014037,FBgn0264785,FBgn0266717,FBgn0023511,FBgn0264975,FBgn0052654,FBgn0000547,FBgn0016917,FBgn0243514,FBgn0086371,FBgn0038578,FBgn0010379,FBgn0026181,FBgn0030310,FBgn0003044,FBgn0030582,FBgn0010389,FBgn0261109,FBgn0016054,FBgn0027889,FBgn0015553,FBgn0031973,FBgn0003447,FBgn0035498,FBgn0028546,FBgn0027375,FBgn0019932,FBgn0262473,FBgn0260935,FBg…
GO:0006357	regulation of transcription from RNA polymerase II promoter	biological_process	6.1055e-15	1.8181e-13	212	3767	442	12231	FBgn0028789,FBgn0028999,FBgn0040339,FBgn0035145,FBgn0028387,FBgn0014018,FBgn0264442,FBgn0001324,FBgn0043900,FBgn0038578,FBgn0265193,FBgn0016794,FBgn0000504,FBgn0011701,FBgn0000567,FBgn0020617,FBgn0010575,FBgn0005630,FBgn0061200,FBgn0014343,FBgn0030082,FBgn0003460,FBgn0010328,FBgn0015402,FBgn0002183,FBgn0038197,FBgn0011763,FBgn0003028,FBgn0015799,FBgn0033636,FBgn0040273,FBgn0000546,FBgn0040318,FBg…
GO:0009798	axis specification	biological_process	6.7757e-15	2.0115e-13	117	3767	207	12231	FBgn0004650,FBgn0020224,FBgn0086362,FBgn0037573,FBgn0004882,FBgn0000183,FBgn0004360,FBgn0024222,FBgn0021818,FBgn0004638,FBgn0026192,FBgn0003475,FBgn0003520,FBgn0000562,FBgn0264492,FBgn0262526,FBgn0011763,FBgn0261014,FBgn0004838,FBgn0262582,FBgn0262473,FBgn0004875,FBgn0259139,FBgn0031903,FBgn0260940,FBgn0263987,FBgn0027948,FBgn0000382,FBgn0038167,FBgn0010269,FBgn0000533,FBgn0002926,FBgn0004656,FBg…
GO:0044265	cellular macromolecule catabolic process	biological_process	9.3877e-15	2.7703e-13	159	3767	309	12231	FBgn0260444,FBgn0022027,FBgn0013756,FBgn0038269,FBgn0051992,FBgn0261268,FBgn0000404,FBgn0033352,FBgn0003575,FBgn0017418,FBgn0037760,FBgn0028686,FBgn0051721,FBgn0028687,FBgn0003165,FBgn0035953,FBgn0260794,FBgn0005632,FBgn0052085,FBgn0020257,FBgn0030863,FBgn0039667,FBgn0034231,FBgn0011661,FBgn0013717,FBgn0259685,FBgn0037707,FBgn0029891,FBgn0001086,FBgn0003483,FBgn0034921,FBgn0033376,FBgn0015282,FBg…
GO:0031399	regulation of protein modification process	biological_process	9.3886e-15	2.7703e-13	134	3767	248	12231	FBgn0037255,FBgn0010433,FBgn0020440,FBgn0260399,FBgn0040281,FBgn0264493,FBgn0030891,FBgn0023518,FBgn0024329,FBgn0001086,FBgn0025743,FBgn0261524,FBgn0025455,FBgn0264922,FBgn0263237,FBgn0030018,FBgn0003053,FBgn0021796,FBgn0036844,FBgn0015399,FBgn0030613,FBgn0025674,FBgn0000405,FBgn0013756,FBgn0031044,FBgn0023216,FBgn0031450,FBgn0000404,FBgn0011573,FBgn0010303,FBgn0039566,FBgn0020510,FBgn0011474,FBg…
GO:0007424	open tracheal system development	biological_process	1.4197e-14	4.1767e-13	121	3767	218	12231	FBgn0003502,FBgn0264075,FBgn0264560,FBgn0011642,FBgn0000319,FBgn0004009,FBgn0000635,FBgn0264959,FBgn0002552,FBgn0001965,FBgn0003079,FBgn0002526,FBgn0003169,FBgn0001168,FBgn0031450,FBgn0028968,FBgn0036844,FBgn0003053,FBgn0003944,FBgn0028969,FBgn0000577,FBgn0261269,FBgn0001180,FBgn0259685,FBgn0024836,FBgn0261854,FBgn0038755,FBgn0035574,FBgn0011739,FBgn0000499,FBgn0043903,FBgn0053196,FBgn0000490,FBg…
GO:0048638	regulation of developmental growth	biological_process	1.5829e-14	4.6427e-13	105	3767	181	12231	FBgn0261456,FBgn0039924,FBgn0053193,FBgn0034265,FBgn0034646,FBgn0267698,FBgn0024234,FBgn0020440,FBgn0263111,FBgn0003371,FBgn0000163,FBgn0263930,FBgn0001150,FBgn0039213,FBgn0020386,FBgn0020251,FBgn0014133,FBgn0000490,FBgn0011571,FBgn0028734,FBgn0001075,FBgn0024277,FBgn0037884,FBgn0039055,FBgn0011739,FBgn0261524,FBgn0005198,FBgn0030600,FBgn0036257,FBgn0036934,FBgn0026317,FBgn0259685,FBgn0003317,FBg…
GO:0007528	neuromuscular junction development	biological_process	1.5962e-14	4.6669e-13	89	3767	145	12231	FBgn0267002,FBgn0015269,FBgn0037015,FBgn0020493,FBgn0266053,FBgn0036641,FBgn0011648,FBgn0000500,FBgn0034135,FBgn0262866,FBgn0038063,FBgn0010341,FBgn0266098,FBgn0004449,FBgn0002921,FBgn0259108,FBgn0001624,FBgn0029840,FBgn0267350,FBgn0259483,FBgn0010415,FBgn0053094,FBgn0262733,FBgn0261788,FBgn0035533,FBgn0035060,FBgn0001122,FBgn0040208,FBgn0038980,FBgn0000017,FBgn0041191,FBgn0262735,FBgn0019985,FBg…
GO:0007416	synapse assembly	biological_process	1.6007e-14	4.6669e-13	89	3767	145	12231	FBgn0000017,FBgn0038980,FBgn0040208,FBgn0001145,FBgn0035060,FBgn0001122,FBgn0035533,FBgn0031866,FBgn0044826,FBgn0000578,FBgn0039632,FBgn0053208,FBgn0024179,FBgn0010379,FBgn0011817,FBgn0262739,FBgn0262735,FBgn0041191,FBgn0015279,FBgn0011701,FBgn0011648,FBgn0034135,FBgn0083975,FBgn0020493,FBgn0266053,FBgn0026192,FBgn0015269,FBgn0267002,FBgn0053094,FBgn0261788,FBgn0262733,FBgn0259483,FBgn0010415,FBg…
GO:0050803	regulation of synapse structure or activity	biological_process	2.0316e-14	5.9056e-13	87	3767	141	12231	FBgn0011571,FBgn0019968,FBgn0037884,FBgn0028734,FBgn0053547,FBgn0024277,FBgn0020429,FBgn0005198,FBgn0034072,FBgn0259246,FBgn0030600,FBgn0036257,FBgn0003380,FBgn0034265,FBgn0036819,FBgn0034646,FBgn0267698,FBgn0263111,FBgn0003371,FBgn0040281,FBgn0024234,FBgn0020440,FBgn0039213,FBgn0002526,FBgn0003165,FBgn0038840,FBgn0034789,FBgn0259174,FBgn0050021,FBgn0039916,FBgn0003292,FBgn0010300,FBgn0264607,FBg…
GO:0046578	regulation of Ras protein signal transduction	biological_process	2.0539e-14	5.9528e-13	74	3767	113	12231	FBgn0035761,FBgn0028538,FBgn0264560,FBgn0053519,FBgn0011573,FBgn0020238,FBgn0039566,FBgn0035802,FBgn0003079,FBgn0037116,FBgn0001965,FBgn0032796,FBgn0264707,FBgn0051158,FBgn0034240,FBgn0035574,FBgn0030613,FBgn0043070,FBgn0003969,FBgn0050440,FBgn0265082,FBgn0025740,FBgn0024277,FBgn0264922,FBgn0031216,FBgn0261570,FBgn0040011,FBgn0037255,FBgn0261119,FBgn0026179,FBgn0031762,FBgn0028500,FBgn0264598,FBg…
GO:0016568	chromatin modification	biological_process	2.2335e-14	6.4539e-13	106	3767	184	12231	FBgn0023518,FBgn0250786,FBgn0052350,FBgn0040066,FBgn0037376,FBgn0025825,FBgn0086908,FBgn0030891,FBgn0260936,FBgn0003567,FBgn0013263,FBgn0037607,FBgn0030093,FBgn0262519,FBgn0034722,FBgn0037659,FBgn0036039,FBgn0261573,FBgn0000541,FBgn0030121,FBgn0263102,FBgn0032030,FBgn0038546,FBgn0000139,FBgn0031876,FBgn0030366,FBgn0025639,FBgn0034537,FBgn0030945,FBgn0030877,FBgn0028734,FBgn0260991,FBgn0000212,FBg…
GO:0022604	regulation of cell morphogenesis	biological_process	2.5793e-14	7.4312e-13	98	3767	166	12231	FBgn0001965,FBgn0020510,FBgn0260934,FBgn0046704,FBgn0000635,FBgn0035761,FBgn0004009,FBgn0003744,FBgn0262743,FBgn0001233,FBgn0003513,FBgn0011771,FBgn0024836,FBgn0019949,FBgn0036985,FBgn0000464,FBgn0027515,FBgn0030391,FBgn0000606,FBgn0025455,FBgn0031781,FBgn0028734,FBgn0024277,FBgn0086680,FBgn0030018,FBgn0034697,FBgn0014133,FBgn0011202,FBgn0000723,FBgn0015754,FBgn0000499,FBgn0002789,FBgn0011739,FBg…
GO:0051049	regulation of transport	biological_process	3.0187e-14	8.6717e-13	104	3767	180	12231	FBgn0024234,FBgn0263111,FBgn0024320,FBgn0003371,FBgn0030057,FBgn0052350,FBgn0036141,FBgn0030341,FBgn0033075,FBgn0000115,FBgn0264493,FBgn0038816,FBgn0027338,FBgn0029709,FBgn0086784,FBgn0014366,FBgn0266671,FBgn0015754,FBgn0086358,FBgn0024833,FBgn0053547,FBgn0264855,FBgn0027575,FBgn0262527,FBgn0031461,FBgn0038747,FBgn0264006,FBgn0053558,FBgn0015622,FBgn0030329,FBgn0041111,FBgn0260003,FBgn0259685,FBg…
GO:0051172	negative regulation of nitrogen compound metabolic process	biological_process	3.5037e-14	1.0035e-12	177	3767	358	12231	FBgn0016756,FBgn0000097,FBgn0000629,FBgn0028471,FBgn0002573,FBgn0020307,FBgn0004360,FBgn0035357,FBgn0250753,FBgn0036239,FBgn0000546,FBgn0040318,FBgn0040273,FBgn0003028,FBgn0015799,FBgn0262582,FBgn0004838,FBgn0042085,FBgn0263979,FBgn0004897,FBgn0261648,FBgn0004606,FBgn0034068,FBgn0000018,FBgn0262166,FBgn0266557,FBgn0051716,FBgn0014343,FBgn0010575,FBgn0000114,FBgn0030082,FBgn0000352,FBgn0022361,FBg…
GO:0051301	cell division	biological_process	3.6446e-14	1.0408e-12	149	3767	288	12231	FBgn0038167,FBgn0013469,FBgn0053094,FBgn0264291,FBgn0002873,FBgn0002914,FBgn0002932,FBgn0260635,FBgn0003392,FBgn0000042,FBgn0010382,FBgn0035762,FBgn0026192,FBgn0003268,FBgn0002466,FBgn0004635,FBgn0011648,FBgn0000482,FBgn0021875,FBgn0011205,FBgn0021760,FBgn0031952,FBgn0023423,FBgn0086356,FBgn0002431,FBgn0011666,FBgn0002121,FBgn0004864,FBgn0010316,FBgn0035640,FBgn0003041,FBgn0265434,FBgn0044324,FBg…
GO:0019538	protein metabolic process	biological_process	3.7092e-14	1.0562e-12	828	3767	2213	12231	FBgn0003256,FBgn0264357,FBgn0032208,FBgn0004924,FBgn0027054,FBgn0039240,FBgn0011300,FBgn0265011,FBgn0044324,FBgn0262081,FBgn0040294,FBgn0010909,FBgn0036196,FBgn0032388,FBgn0036207,FBgn0086442,FBgn0000239,FBgn0025625,FBgn0052376,FBgn0061476,FBgn0044323,FBgn0004644,FBgn0003464,FBgn0031047,FBgn0033235,FBgn0039420,FBgn0263278,FBgn0026428,FBgn0014006,FBgn0264694,FBgn0265998,FBgn0038167,FBgn0263933,FBg…
GO:0010948	negative regulation of cell cycle process	biological_process	4.739e-14	1.3455e-12	72	3767	110	12231	FBgn0023213,FBgn0011648,FBgn0002783,FBgn0028837,FBgn0027055,FBgn0004855,FBgn0037263,FBgn0261437,FBgn0033354,FBgn0036239,FBgn0003268,FBgn0003732,FBgn0004367,FBgn0015509,FBgn0015799,FBgn0040273,FBgn0004106,FBgn0002901,FBgn0040078,FBgn0015546,FBgn0061476,FBgn0031885,FBgn0026326,FBgn0027054,FBgn0004419,FBgn0044324,FBgn0003884,FBgn0000064,FBgn0002878,FBgn0038578,FBgn0010173,FBgn0261278,FBgn0038814,FBg…
GO:0042127	regulation of cell proliferation	biological_process	4.9935e-14	1.4137e-12	97	3767	165	12231	FBgn0010382,FBgn0040388,FBgn0020224,FBgn0263995,FBgn0023423,FBgn0002783,FBgn0027497,FBgn0003525,FBgn0003984,FBgn0016797,FBgn0001624,FBgn0011715,FBgn0265998,FBgn0259176,FBgn0002914,FBgn0000546,FBgn0013469,FBgn0041171,FBgn0015799,FBgn0263979,FBgn0262081,FBgn0262127,FBgn0004177,FBgn0038197,FBgn0034051,FBgn0052418,FBgn0031799,FBgn0024510,FBgn0004644,FBgn0038257,FBgn0003256,FBgn0002121,FBgn0010389,FBg…
GO:0042461	photoreceptor cell development	biological_process	5.1407e-14	1.4511e-12	71	3767	108	12231	FBgn0001108,FBgn0000464,FBgn0264006,FBgn0033179,FBgn0003053,FBgn0259685,FBgn0000173,FBgn0024836,FBgn0041111,FBgn0011661,FBgn0046704,FBgn0086677,FBgn0261984,FBgn0038223,FBgn0000163,FBgn0265297,FBgn0003118,FBgn0261458,FBgn0028500,FBgn0004102,FBgn0000723,FBgn0015754,FBgn0266671,FBgn0025743,FBgn0259210,FBgn0027335,FBgn0001202,FBgn0003310,FBgn0031745,FBgn0020391,FBgn0002573,FBgn0000097,FBgn0029818,FBg…
GO:0060541	respiratory system development	biological_process	5.8013e-14	1.6329e-12	123	3767	226	12231	FBgn0004390,FBgn0265434,FBgn0264785,FBgn0033438,FBgn0262125,FBgn0086657,FBgn0034408,FBgn0038341,FBgn0026562,FBgn0010379,FBgn0025879,FBgn0013997,FBgn0264975,FBgn0010316,FBgn0014388,FBgn0000547,FBgn0004864,FBgn0086901,FBgn0016917,FBgn0024230,FBgn0264089,FBgn0024236,FBgn0023172,FBgn0004644,FBgn0010434,FBgn0010350,FBgn0015402,FBgn0003870,FBgn0015019,FBgn0041171,FBgn0038916,FBgn0262733,FBgn0003392,FBg…
GO:0009952	anterior/posterior pattern specification	biological_process	7.7249e-14	2.1646e-12	101	3767	175	12231	FBgn0003520,FBgn0003475,FBgn0004638,FBgn0021818,FBgn0004360,FBgn0020493,FBgn0000183,FBgn0004882,FBgn0037573,FBgn0033988,FBgn0000014,FBgn0004650,FBgn0002985,FBgn0052133,FBgn0011648,FBgn0010269,FBgn0038167,FBgn0027948,FBgn0000382,FBgn0260940,FBgn0031903,FBgn0259139,FBgn0004875,FBgn0262582,FBgn0004838,FBgn0261014,FBgn0000546,FBgn0262526,FBgn0015402,FBgn0026431,FBgn0000181,FBgn0040294,FBgn0004242,FBg…
GO:0000003	reproduction	biological_process	7.7347e-14	2.1646e-12	502	3767	1256	12231	FBgn0086687,FBgn0263864,FBgn0000352,FBgn0262127,FBgn0263782,FBgn0000114,FBgn0023172,FBgn0040207,FBgn0000017,FBgn0000533,FBgn0000504,FBgn0015279,FBgn0020278,FBgn0003950,FBgn0261278,FBgn0262735,FBgn0039227,FBgn0038395,FBgn0028426,FBgn0011020,FBgn0038341,FBgn0039632,FBgn0005536,FBgn0002878,FBgn0036546,FBgn0250823,FBgn0015789,FBgn0036715,FBgn0003124,FBgn0003862,FBgn0250753,FBgn0004367,FBgn0261437,FBg…
GO:0000226	microtubule cytoskeleton organization	biological_process	1.3348e-13	3.7249e-12	199	3767	419	12231	FBgn0004889,FBgn0001108,FBgn0263197,FBgn0040080,FBgn0004379,FBgn0015600,FBgn0011661,FBgn0032444,FBgn0029969,FBgn0000405,FBgn0030268,FBgn0001308,FBgn0000273,FBgn0000319,FBgn0013756,FBgn0086690,FBgn0033447,FBgn0027066,FBgn0266521,FBgn0265574,FBgn0031575,FBgn0035766,FBgn0020255,FBgn0000996,FBgn0261836,FBgn0016034,FBgn0039213,FBgn0260399,FBgn0004436,FBgn0026370,FBgn0263929,FBgn0029897,FBgn0027655,FBg…
GO:0009880	embryonic pattern specification	biological_process	1.702e-13	4.7359e-12	119	3767	219	12231	FBgn0021818,FBgn0004638,FBgn0003475,FBgn0003520,FBgn0052133,FBgn0011648,FBgn0002985,FBgn0004650,FBgn0000014,FBgn0004882,FBgn0067317,FBgn0037573,FBgn0000183,FBgn0001079,FBgn0260940,FBgn0001235,FBgn0000382,FBgn0266557,FBgn0027948,FBgn0262166,FBgn0265998,FBgn0038167,FBgn0010269,FBgn0262526,FBgn0261014,FBgn0262473,FBgn0262582,FBgn0004838,FBgn0004875,FBgn0259139,FBgn0004242,FBgn0040294,FBgn0000181,FBg…
GO:0042051	compound eye photoreceptor development	biological_process	1.7707e-13	4.9131e-12	62	3767	91	12231	FBgn0025743,FBgn0003256,FBgn0013726,FBgn0027356,FBgn0014388,FBgn0015754,FBgn0266671,FBgn0040505,FBgn0027335,FBgn0039132,FBgn0023489,FBgn0259210,FBgn0016081,FBgn0005536,FBgn0035106,FBgn0015797,FBgn0265297,FBgn0040294,FBgn0003118,FBgn0000320,FBgn0003870,FBgn0261984,FBgn0267435,FBgn0038223,FBgn0002576,FBgn0028500,FBgn0261458,FBgn0005630,FBgn0004102,FBgn0044323,FBgn0261397,FBgn0034070,FBgn0266450,FBg…
GO:0048598	embryonic morphogenesis	biological_process	1.8235e-13	5.0454e-12	126	3767	236	12231	FBgn0086901,FBgn0030766,FBgn0015279,FBgn0004864,FBgn0000547,FBgn0013997,FBgn0026181,FBgn0003256,FBgn0010389,FBgn0002121,FBgn0016075,FBgn0026562,FBgn0000633,FBgn0005536,FBgn0000221,FBgn0265434,FBgn0000578,FBgn0003041,FBgn0003388,FBgn0266756,FBgn0000320,FBgn0026323,FBgn0010909,FBgn0040294,FBgn0003460,FBgn0010434,FBgn0261873,FBgn0023172,FBgn0044323,FBgn0003312,FBgn0264089,FBgn0015513,FBgn0000017,FBg…
GO:0060284	regulation of cell development	biological_process	1.9263e-13	5.3147e-12	113	3767	205	12231	FBgn0002783,FBgn0030276,FBgn0025741,FBgn0023423,FBgn0011217,FBgn0000097,FBgn0034012,FBgn0267002,FBgn0003520,FBgn0031005,FBgn0004638,FBgn0039234,FBgn0261014,FBgn0260635,FBgn0004838,FBgn0026375,FBgn0040372,FBgn0004875,FBgn0041171,FBgn0011763,FBgn0013469,FBgn0002932,FBgn0259176,FBgn0015589,FBgn0001235,FBgn0262866,FBgn0261108,FBgn0010341,FBgn0000382,FBgn0001624,FBgn0266450,FBgn0029688,FBgn0023172,FBg…
GO:0051094	positive regulation of developmental process	biological_process	1.9718e-13	5.4249e-12	87	3767	145	12231	FBgn0021796,FBgn0038747,FBgn0002735,FBgn0003944,FBgn0000173,FBgn0036934,FBgn0261854,FBgn0015806,FBgn0003317,FBgn0000394,FBgn0011642,FBgn0004009,FBgn0037874,FBgn0003867,FBgn0003430,FBgn0003079,FBgn0259174,FBgn0017418,FBgn0263111,FBgn0024234,FBgn0004102,FBgn0260936,FBgn0039924,FBgn0034265,FBgn0027609,FBgn0004859,FBgn0267698,FBgn0261524,FBgn0000499,FBgn0041100,FBgn0011766,FBgn0029891,FBgn0025743,FBg…
GO:0016567	protein ubiquitination	biological_process	2.0438e-13	5.6072e-12	107	3767	191	12231	FBgn0023097,FBgn0267351,FBgn0037659,FBgn0038686,FBgn0023528,FBgn0036897,FBgn0261119,FBgn0264493,FBgn0037781,FBgn0000063,FBgn0052350,FBgn0039668,FBgn0033544,FBgn0035233,FBgn0030600,FBgn0003943,FBgn0029891,FBgn0001086,FBgn0003330,FBgn0041100,FBgn0061469,FBgn0027052,FBgn0015320,FBgn0052672,FBgn0034989,FBgn0032467,FBgn0003410,FBgn0031384,FBgn0030809,FBgn0027512,FBgn0000351,FBgn0058045,FBgn0036516,FBg…
GO:0032446	protein modification by small protein conjugation	biological_process	2.6366e-13	7.2133e-12	111	3767	201	12231	FBgn0029006,FBgn0260635,FBgn0035483,FBgn0002932,FBgn0264492,FBgn0035232,FBgn0029911,FBgn0266918,FBgn0036660,FBgn0051716,FBgn0034314,FBgn0031773,FBgn0039767,FBgn0005616,FBgn0001079,FBgn0023423,FBgn0026206,FBgn0035853,FBgn0025186,FBgn0034546,FBgn0020224,FBgn0035207,FBgn0032812,FBgn0011217,FBgn0015509,FBgn0003268,FBgn0010382,FBgn0015321,FBgn0263974,FBgn0031816,FBgn0086694,FBgn0044324,FBgn0036546,FBg…
GO:1901988	negative regulation of cell cycle phase transition	biological_process	2.7496e-13	7.4806e-12	67	3767	102	12231	FBgn0002783,FBgn0004855,FBgn0027055,FBgn0028837,FBgn0011648,FBgn0023213,FBgn0004367,FBgn0003268,FBgn0003732,FBgn0036239,FBgn0015509,FBgn0037263,FBgn0261437,FBgn0033354,FBgn0015799,FBgn0004106,FBgn0040273,FBgn0002901,FBgn0040078,FBgn0061476,FBgn0031885,FBgn0026326,FBgn0003884,FBgn0044324,FBgn0000064,FBgn0002878,FBgn0004419,FBgn0027054,FBgn0010316,FBgn0261278,FBgn0035640,FBgn0038578,FBgn0010173,FBg…
GO:1901991	negative regulation of mitotic cell cycle phase transition	biological_process	2.7496e-13	7.4806e-12	67	3767	102	12231	FBgn0002783,FBgn0028837,FBgn0027055,FBgn0004855,FBgn0023213,FBgn0011648,FBgn0003268,FBgn0003732,FBgn0036239,FBgn0004367,FBgn0015509,FBgn0037263,FBgn0033354,FBgn0261437,FBgn0015799,FBgn0040273,FBgn0004106,FBgn0002901,FBgn0040078,FBgn0061476,FBgn0031885,FBgn0026326,FBgn0044324,FBgn0003884,FBgn0000064,FBgn0002878,FBgn0004419,FBgn0027054,FBgn0261278,FBgn0010316,FBgn0035640,FBgn0038578,FBgn0010173,FBg…
GO:0051124	synaptic growth at neuromuscular junction	biological_process	2.8837e-13	7.8238e-12	74	3767	117	12231	FBgn0002526,FBgn0003165,FBgn0050021,FBgn0034789,FBgn0086677,FBgn0010300,FBgn0264607,FBgn0032956,FBgn0264959,FBgn0260934,FBgn0046704,FBgn0000635,FBgn0004009,FBgn0003360,FBgn0000173,FBgn0003317,FBgn0015806,FBgn0038747,FBgn0021796,FBgn0013762,FBgn0000464,FBgn0020386,FBgn0011571,FBgn0028734,FBgn0024277,FBgn0037884,FBgn0031006,FBgn0005198,FBgn0030600,FBgn0036257,FBgn0036376,FBgn0034265,FBgn0034646,FBg…
GO:0009890	negative regulation of biosynthetic process	biological_process	3.1082e-13	8.3862e-12	168	3767	342	12231	FBgn0262519,FBgn0261573,FBgn0260632,FBgn0001150,FBgn0037376,FBgn0025825,FBgn0086908,FBgn0261456,FBgn0004102,FBgn0037607,FBgn0001320,FBgn0013263,FBgn0265523,FBgn0261823,FBgn0003330,FBgn0017550,FBgn0005624,FBgn0032929,FBgn0017430,FBgn0030366,FBgn0005695,FBgn0263396,FBgn0028734,FBgn0003042,FBgn0015371,FBgn0086613,FBgn0004795,FBgn0000577,FBgn0001180,FBgn0011837,FBgn0087035,FBgn0037327,FBgn0265276,FBg…
GO:0031327	negative regulation of cellular biosynthetic process	biological_process	3.1082e-13	8.3862e-12	168	3767	342	12231	FBgn0016070,FBgn0027620,FBgn0036915,FBgn0039338,FBgn0023509,FBgn0031903,FBgn0001222,FBgn0023076,FBgn0259938,FBgn0028926,FBgn0002985,FBgn0020224,FBgn0020496,FBgn0038100,FBgn0000283,FBgn0003732,FBgn0032475,FBgn0033029,FBgn0011604,FBgn0010416,FBgn0000448,FBgn0038872,FBgn0011666,FBgn0010825,FBgn0004656,FBgn0035769,FBgn0002576,FBgn0034261,FBgn0031047,FBgn0085450,FBgn0029800,FBgn0027950,FBgn0002733,FBg…
GO:0007163	establishment or maintenance of cell polarity	biological_process	3.2302e-13	8.6913e-12	107	3767	192	12231	FBgn0259212,FBgn0264493,FBgn0261458,FBgn0264272,FBgn0010215,FBgn0016034,FBgn0020255,FBgn0000163,FBgn0003371,FBgn0263929,FBgn0028573,FBgn0266409,FBgn0003118,FBgn0003731,FBgn0263396,FBgn0001075,FBgn0034451,FBgn0019968,FBgn0034072,FBgn0004381,FBgn0033984,FBgn0027655,FBgn0000499,FBgn0001259,FBgn0001083,FBgn0261854,FBgn0015331,FBgn0261064,FBgn0260003,FBgn0003651,FBgn0259685,FBgn0011661,FBgn0024836,FBg…
GO:1990234	transferase complex	cellular_component	3.2513e-13	8.7239e-12	164	3767	332	12231	FBgn0264848,FBgn0003042,FBgn0003277,FBgn0036374,FBgn0030087,FBgn0030945,FBgn0034277,FBgn0033639,FBgn0003410,FBgn0010750,FBgn0030612,FBgn0026441,FBgn0005624,FBgn0003330,FBgn0027296,FBgn0260749,FBgn0261850,FBgn0010417,FBgn0262699,FBgn0034964,FBgn0266711,FBgn0033897,FBgn0038016,FBgn0032030,FBgn0039636,FBgn0033260,FBgn0039710,FBgn0027378,FBgn0011836,FBgn0025638,FBgn0032956,FBgn0001179,FBgn0053554,FBg…
GO:0051640	organelle localization	biological_process	3.5873e-13	9.5993e-12	117	3767	216	12231	FBgn0261397,FBgn0266757,FBgn0034691,FBgn0000147,FBgn0011225,FBgn0266756,FBgn0266669,FBgn0039140,FBgn0003210,FBgn0010909,FBgn0004242,FBgn0035060,FBgn0262125,FBgn0033845,FBgn0044324,FBgn0261671,FBgn0039132,FBgn0003124,FBgn0023023,FBgn0264606,FBgn0052654,FBgn0039900,FBgn0027356,FBgn0026181,FBgn0013997,FBgn0002121,FBgn0016975,FBgn0010348,FBgn0261279,FBgn0033379,FBgn0036932,FBgn0021760,FBgn0000183,FBg…
GO:0019220	regulation of phosphate metabolic process	biological_process	3.8778e-13	1.032e-11	119	3767	221	12231	FBgn0000711,FBgn0015625,FBgn0259212,FBgn0261119,FBgn0264493,FBgn0262699,FBgn0020440,FBgn0260399,FBgn0040281,FBgn0003371,FBgn0037255,FBgn0010433,FBgn0263237,FBgn0030018,FBgn0040011,FBgn0259791,FBgn0024326,FBgn0027575,FBgn0264848,FBgn0025455,FBgn0264922,FBgn0025743,FBgn0001086,FBgn0041100,FBgn0027053,FBgn0032378,FBgn0028429,FBgn0005198,FBgn0261524,FBgn0024329,FBgn0034072,FBgn0026317,FBgn0036934,FBg…
GO:0051174	regulation of phosphorus metabolic process	biological_process	3.8778e-13	1.032e-11	119	3767	221	12231	FBgn0003053,FBgn0021796,FBgn0036844,FBgn0000351,FBgn0001123,FBgn0036934,FBgn0026317,FBgn0015399,FBgn0003360,FBgn0030613,FBgn0259685,FBgn0025674,FBgn0011737,FBgn0037874,FBgn0260446,FBgn0004009,FBgn0000405,FBgn0031044,FBgn0031450,FBgn0000404,FBgn0011573,FBgn0086677,FBgn0020238,FBgn0010303,FBgn0020510,FBgn0039566,FBgn0003079,FBgn0037255,FBgn0010433,FBgn0020440,FBgn0260399,FBgn0040281,FBgn0003371,FBg…
GO:0002064	epithelial cell development	biological_process	4.2552e-13	1.1294e-11	153	3767	305	12231	FBgn0053558,FBgn0036985,FBgn0025815,FBgn0003334,FBgn0261854,FBgn0031030,FBgn0021814,FBgn0004009,FBgn0260934,FBgn0264560,FBgn0033260,FBgn0261963,FBgn0039709,FBgn0003079,FBgn0039232,FBgn0066365,FBgn0005655,FBgn0005638,FBgn0041184,FBgn0261266,FBgn0000163,FBgn0003371,FBgn0032363,FBgn0041096,FBgn0004811,FBgn0264695,FBgn0261285,FBgn0261456,FBgn0020620,FBgn0266671,FBgn0003330,FBgn0034009,FBgn0263396,FBg…
GO:0010628	positive regulation of gene expression	biological_process	5.4899e-13	1.4531e-11	161	3767	326	12231	FBgn0028982,FBgn0000370,FBgn0002775,FBgn0011723,FBgn0003944,FBgn0037792,FBgn0000606,FBgn0039904,FBgn0261885,FBgn0003165,FBgn0002552,FBgn0010303,FBgn0040305,FBgn0000273,FBgn0013756,FBgn0004859,FBgn0003567,FBgn0250816,FBgn0039066,FBgn0030093,FBgn0023518,FBgn0030891,FBgn0010433,FBgn0259789,FBgn0265297,FBgn0261793,FBgn0003118,FBgn0262527,FBgn0034967,FBgn0022724,FBgn0000212,FBgn0019972,FBgn0086680,FBg…
GO:0042325	regulation of phosphorylation	biological_process	6.919e-13	1.8264e-11	105	3767	189	12231	FBgn0037255,FBgn0010433,FBgn0003371,FBgn0020440,FBgn0040281,FBgn0259212,FBgn0015625,FBgn0262699,FBgn0264493,FBgn0261119,FBgn0000711,FBgn0034072,FBgn0024329,FBgn0005198,FBgn0261524,FBgn0001086,FBgn0025743,FBgn0041100,FBgn0027053,FBgn0032378,FBgn0025455,FBgn0264922,FBgn0024326,FBgn0264848,FBgn0030018,FBgn0259791,FBgn0040011,FBgn0263237,FBgn0036844,FBgn0000351,FBgn0021796,FBgn0003053,FBgn0259685,FBg…
GO:0042462	eye photoreceptor cell development	biological_process	7.863e-13	2.07e-11	62	3767	93	12231	FBgn0041188,FBgn0000206,FBgn0034070,FBgn0266450,FBgn0004449,FBgn0265998,FBgn0000382,FBgn0046704,FBgn0002932,FBgn0004618,FBgn0265174,FBgn0000253,FBgn0086677,FBgn0039234,FBgn0261014,FBgn0003310,FBgn0031745,FBgn0020391,FBgn0001202,FBgn0264006,FBgn0033179,FBgn0000464,FBgn0001108,FBgn0029818,FBgn0034135,FBgn0041111,FBgn0024836,FBgn0011661,FBgn0000097,FBgn0259685,FBgn0002573,FBgn0003256,FBgn0025743,FBg…
GO:1901575	organic substance catabolic process	biological_process	8.8239e-13	2.3167e-11	246	3767	551	12231	FBgn0034704,FBgn0038862,FBgn0036752,FBgn0267385,FBgn0036196,FBgn0037697,FBgn0040294,FBgn0027601,FBgn0001258,FBgn0031047,FBgn0031187,FBgn0061476,FBgn0030674,FBgn0086346,FBgn0038515,FBgn0034997,FBgn0025352,FBgn0034484,FBgn0033738,FBgn0028476,FBgn0023535,FBgn0035640,FBgn0032208,FBgn0003557,FBgn0002431,FBgn0004914,FBgn0039114,FBgn0044324,FBgn0035959,FBgn0003884,FBgn0039226,FBgn0027054,FBgn0033029,FBg…
GO:0010558	negative regulation of macromolecule biosynthetic process	biological_process	1.3621e-12	3.5571e-11	163	3767	334	12231	FBgn0003567,FBgn0017578,FBgn0004859,FBgn0014143,FBgn0260936,FBgn0016034,FBgn0263102,FBgn0025639,FBgn0034537,FBgn0022238,FBgn0011764,FBgn0264954,FBgn0011739,FBgn0003483,FBgn0011766,FBgn0036134,FBgn0002775,FBgn0002521,FBgn0264001,FBgn0003944,FBgn0263352,FBgn0000179,FBgn0033846,FBgn0022764,FBgn0002735,FBgn0000606,FBgn0001325,FBgn0037760,FBgn0003575,FBgn0033081,FBgn0011758,FBgn0003165,FBgn0004878,FBg…
GO:2000113	negative regulation of cellular macromolecule biosynthetic process	biological_process	1.3621e-12	3.5571e-11	163	3767	334	12231	FBgn0261648,FBgn0004606,FBgn0000018,FBgn0262166,FBgn0266557,FBgn0051716,FBgn0000546,FBgn0040318,FBgn0040273,FBgn0003028,FBgn0015799,FBgn0262582,FBgn0004838,FBgn0042085,FBgn0263979,FBgn0004897,FBgn0035357,FBgn0004360,FBgn0250753,FBgn0036239,FBgn0016756,FBgn0000097,FBgn0000629,FBgn0002573,FBgn0020307,FBgn0039227,FBgn0026573,FBgn0003044,FBgn0262739,FBgn0053100,FBgn0027339,FBgn0036964,FBgn0000504,FBg…
GO:0051173	positive regulation of nitrogen compound metabolic process	biological_process	1.379e-12	3.5918e-11	170	3767	352	12231	FBgn0004170,FBgn0031145,FBgn0001222,FBgn0004618,FBgn0014340,FBgn0002914,FBgn0028926,FBgn0019650,FBgn0038063,FBgn0011715,FBgn0023076,FBgn0003687,FBgn0020279,FBgn0002783,FBgn0011648,FBgn0002985,FBgn0022740,FBgn0000014,FBgn0015269,FBgn0024222,FBgn0026083,FBgn0022787,FBgn0015919,FBgn0011604,FBgn0261647,FBgn0041191,FBgn0023091,FBgn0000448,FBgn0004644,FBgn0015829,FBgn0004656,FBgn0002576,FBgn0011289,FBg…
GO:0000578	embryonic axis specification	biological_process	1.7093e-12	4.4401e-11	83	3767	140	12231	FBgn0001321,FBgn0004102,FBgn0001320,FBgn0000163,FBgn0003731,FBgn0260632,FBgn0003118,FBgn0263102,FBgn0016034,FBgn0001150,FBgn0000490,FBgn0005695,FBgn0003495,FBgn0263396,FBgn0261524,FBgn0032340,FBgn0027053,FBgn0034921,FBgn0003483,FBgn0034072,FBgn0011661,FBgn0261854,FBgn0003317,FBgn0261064,FBgn0004510,FBgn0003053,FBgn0000606,FBgn0001325,FBgn0001180,FBgn0003867,FBgn0003430,FBgn0003079,FBgn0002552,FBg…
GO:0007350	blastoderm segmentation	biological_process	1.7212e-12	4.4591e-11	110	3767	203	12231	FBgn0001321,FBgn0036141,FBgn0014143,FBgn0004102,FBgn0004859,FBgn0001320,FBgn0003371,FBgn0000163,FBgn0003731,FBgn0003118,FBgn0260632,FBgn0263102,FBgn0016034,FBgn0027535,FBgn0001150,FBgn0039907,FBgn0000490,FBgn0020251,FBgn0005695,FBgn0000251,FBgn0003042,FBgn0263396,FBgn0032340,FBgn0261524,FBgn0027053,FBgn0003483,FBgn0034921,FBgn0034072,FBgn0043903,FBgn0087035,FBgn0041111,FBgn0024836,FBgn0011661,FBg…
GO:0051247	positive regulation of protein metabolic process	biological_process	1.8065e-12	4.6678e-11	96	3767	170	12231	FBgn0035437,FBgn0044323,FBgn0040038,FBgn0263782,FBgn0031885,FBgn0086346,FBgn0032388,FBgn0263667,FBgn0027835,FBgn0015402,FBgn0263864,FBgn0010909,FBgn0026323,FBgn0016081,FBgn0086657,FBgn0037093,FBgn0041707,FBgn0011300,FBgn0041191,FBgn0038504,FBgn0040505,FBgn0015279,FBgn0028426,FBgn0031633,FBgn0003256,FBgn0037573,FBgn0036932,FBgn0004882,FBgn0001079,FBgn0036892,FBgn0003520,FBgn0021818,FBgn0004638,FBg…
GO:0009891	positive regulation of biosynthetic process	biological_process	1.9393e-12	4.9844e-11	168	3767	348	12231	FBgn0003430,FBgn0033749,FBgn0261963,FBgn0264075,FBgn0010356,FBgn0003720,FBgn0010280,FBgn0033052,FBgn0045759,FBgn0263289,FBgn0004009,FBgn0004837,FBgn0265089,FBgn0040071,FBgn0021872,FBgn0000099,FBgn0015371,FBgn0004795,FBgn0001180,FBgn0000577,FBgn0010750,FBgn0000137,FBgn0000251,FBgn0260749,FBgn0086358,FBgn0004396,FBgn0017430,FBgn0003507,FBgn0033897,FBgn0038016,FBgn0035993,FBgn0004102,FBgn0005561,FBg…
GO:0031328	positive regulation of cellular biosynthetic process	biological_process	1.9393e-12	4.9844e-11	168	3767	348	12231	FBgn0086680,FBgn0000139,FBgn0262527,FBgn0003495,FBgn0000212,FBgn0034967,FBgn0022724,FBgn0019972,FBgn0013799,FBgn0011766,FBgn0023518,FBgn0030891,FBgn0004859,FBgn0003567,FBgn0030093,FBgn0039066,FBgn0265297,FBgn0261793,FBgn0003118,FBgn0010433,FBgn0035976,FBgn0259789,FBgn0261885,FBgn0039904,FBgn0002552,FBgn0003165,FBgn0010303,FBgn0000250,FBgn0000273,FBgn0013756,FBgn0040305,FBgn0011723,FBgn0002775,FBg…
GO:0000075	cell cycle checkpoint	biological_process	2.2531e-12	5.7758e-11	66	3767	103	12231	FBgn0000996,FBgn0003612,FBgn0000541,FBgn0267351,FBgn0000063,FBgn0027338,FBgn0020633,FBgn0038016,FBgn0040066,FBgn0033897,FBgn0015754,FBgn0026143,FBgn0052251,FBgn0017550,FBgn0027053,FBgn0011785,FBgn0003277,FBgn0262527,FBgn0020270,FBgn0038827,FBgn0040347,FBgn0011737,FBgn0037874,FBgn0085436,FBgn0013756,FBgn0045035,FBgn0033260,FBgn0020238,FBgn0039710,FBgn0027057,FBgn0029504,FBgn0011474,FBgn0026326,FBg…
GO:0030707	ovarian follicle cell development	biological_process	2.3817e-12	6.089e-11	141	3767	280	12231	FBgn0259984,FBgn0011225,FBgn0001977,FBgn0002926,FBgn0266757,FBgn0004644,FBgn0000320,FBgn0035632,FBgn0003388,FBgn0003870,FBgn0265434,FBgn0000221,FBgn0000578,FBgn0016031,FBgn0085443,FBgn0027505,FBgn0004864,FBgn0014388,FBgn0020224,FBgn0004650,FBgn0000482,FBgn0011648,FBgn0023423,FBgn0010382,FBgn0026192,FBgn0001250,FBgn0263510,FBgn0000307,FBgn0004635,FBgn0002932,FBgn0259176,FBgn0002914,FBgn0023509,FBg…
GO:0005875	microtubule associated complex	cellular_component	2.3877e-12	6.089e-11	177	3767	372	12231	FBgn0004379,FBgn0033465,FBgn0000464,FBgn0001108,FBgn0031703,FBgn0004889,FBgn0035581,FBgn0029969,FBgn0013718,FBgn0032444,FBgn0004374,FBgn0032393,FBgn0262743,FBgn0001308,FBgn0034527,FBgn0030268,FBgn0029093,FBgn0013812,FBgn0266521,FBgn0027066,FBgn0265297,FBgn0266579,FBgn0011211,FBgn0086446,FBgn0020255,FBgn0040066,FBgn0039925,FBgn0020633,FBgn0031824,FBgn0265045,FBgn0004401,FBgn0003943,FBgn0261549,FBg…
GO:0007517	muscle organ development	biological_process	2.5035e-12	6.3676e-11	84	3767	143	12231	FBgn0011604,FBgn0086906,FBgn0014863,FBgn0032248,FBgn0262125,FBgn0025463,FBgn0035539,FBgn0264442,FBgn0029830,FBgn0016075,FBgn0010389,FBgn0000547,FBgn0082598,FBgn0040505,FBgn0259984,FBgn0015513,FBgn0038042,FBgn0086368,FBgn0004169,FBgn0020887,FBgn0027620,FBgn0000546,FBgn0263979,FBgn0004657,FBgn0003984,FBgn0004606,FBgn0261648,FBgn0004862,FBgn0011715,FBgn0000097,FBgn0022740,FBgn0000014,FBgn0033988,FBg…
GO:0007268	synaptic transmission	biological_process	2.6469e-12	6.7149e-11	126	3767	243	12231	FBgn0003165,FBgn0052056,FBgn0038840,FBgn0042693,FBgn0030230,FBgn0086677,FBgn0026439,FBgn0039916,FBgn0031450,FBgn0003292,FBgn0010300,FBgn0031106,FBgn0026313,FBgn0013342,FBgn0264607,FBgn0000273,FBgn0001308,FBgn0000319,FBgn0266667,FBgn0030089,FBgn0266758,FBgn0264087,FBgn0003651,FBgn0260003,FBgn0003360,FBgn0030613,FBgn0001123,FBgn0039260,FBgn0039212,FBgn0260386,FBgn0259824,FBgn0004868,FBgn0038747,FBg…
GO:0002065	columnar/cuboidal epithelial cell differentiation	biological_process	2.8059e-12	7.0999e-11	142	3767	283	12231	FBgn0000097,FBgn0086695,FBgn0003475,FBgn0004167,FBgn0243511,FBgn0262733,FBgn0000546,FBgn0262526,FBgn0015799,FBgn0011763,FBgn0262582,FBgn0004838,FBgn0263979,FBgn0024811,FBgn0032006,FBgn0001624,FBgn0263987,FBgn0010341,FBgn0266557,FBgn0014343,FBgn0015513,FBgn0040207,FBgn0000352,FBgn0262127,FBgn0262740,FBgn0010235,FBgn0000182,FBgn0036715,FBgn0264442,FBgn0036740,FBgn0039227,FBgn0016917,FBgn0020278,FBg…
GO:0016265	death	biological_process	2.8754e-12	7.2569e-11	155	3767	316	12231	FBgn0023423,FBgn0036165,FBgn0000565,FBgn0020224,FBgn0000014,FBgn0000108,FBgn0263231,FBgn0015509,FBgn0010382,FBgn0003310,FBgn0004170,FBgn0260635,FBgn0003392,FBgn0259176,FBgn0014340,FBgn0039338,FBgn0034894,FBgn0013469,FBgn0264291,FBgn0038167,FBgn0265998,FBgn0028484,FBgn0000382,FBgn0041188,FBgn0014006,FBgn0035497,FBgn0003984,FBgn0040038,FBgn0262738,FBgn0052418,FBgn0036974,FBgn0002576,FBgn0086346,FBg…
GO:0051656	establishment of organelle localization	biological_process	3.0157e-12	7.5914e-11	104	3767	190	12231	FBgn0020255,FBgn0016034,FBgn0028582,FBgn0261836,FBgn0040281,FBgn0000163,FBgn0027363,FBgn0000063,FBgn0261722,FBgn0259212,FBgn0038816,FBgn0030057,FBgn0000711,FBgn0000115,FBgn0015754,FBgn0266671,FBgn0027655,FBgn0086784,FBgn0027575,FBgn0264855,FBgn0260991,FBgn0053547,FBgn0053653,FBgn0011708,FBgn0036059,FBgn0020251,FBgn0024833,FBgn0019968,FBgn0004179,FBgn0263968,FBgn0001108,FBgn0005632,FBgn0040080,FBg…
GO:0045202	synapse	cellular_component	3.0605e-12	7.6842e-11	109	3767	202	12231	FBgn0266757,FBgn0034691,FBgn0035533,FBgn0266756,FBgn0026378,FBgn0003210,FBgn0004242,FBgn0035060,FBgn0015797,FBgn0053208,FBgn0000578,FBgn0085447,FBgn0039132,FBgn0031866,FBgn0015789,FBgn0264606,FBgn0015372,FBgn0040505,FBgn0039900,FBgn0027356,FBgn0016975,FBgn0002121,FBgn0027505,FBgn0029830,FBgn0031702,FBgn0036641,FBgn0032151,FBgn0000482,FBgn0260964,FBgn0086372,FBgn0262518,FBgn0031455,FBgn0083975,FBg…
GO:0002066	columnar/cuboidal epithelial cell development	biological_process	3.33e-12	8.3394e-11	141	3767	281	12231	FBgn0030018,FBgn0264922,FBgn0000499,FBgn0011766,FBgn0003483,FBgn0011739,FBgn0052642,FBgn0043903,FBgn0015754,FBgn0004859,FBgn0024234,FBgn0003731,FBgn0003118,FBgn0263929,FBgn0000996,FBgn0016034,FBgn0266521,FBgn0010303,FBgn0031450,FBgn0033081,FBgn0000250,FBgn0026238,FBgn0262743,FBgn0005390,FBgn0267390,FBgn0022027,FBgn0031304,FBgn0003317,FBgn0015600,FBgn0004374,FBgn0033846,FBgn0003416,FBgn0000578,FBg…
GO:0007093	mitotic cell cycle checkpoint	biological_process	3.4393e-12	8.5912e-11	61	3767	93	12231	FBgn0040347,FBgn0004855,FBgn0028837,FBgn0027055,FBgn0023213,FBgn0004367,FBgn0003268,FBgn0036239,FBgn0003732,FBgn0015509,FBgn0037263,FBgn0038827,FBgn0020270,FBgn0261437,FBgn0033354,FBgn0020238,FBgn0033260,FBgn0015799,FBgn0027057,FBgn0029504,FBgn0004106,FBgn0039710,FBgn0040273,FBgn0085436,FBgn0037874,FBgn0011737,FBgn0045035,FBgn0002901,FBgn0013756,FBgn0040078,FBgn0061476,FBgn0027338,FBgn0000063,FBg…
GO:0005938	cell cortex	cellular_component	4.0818e-12	1.017e-10	72	3767	117	12231	FBgn0020224,FBgn0025802,FBgn0002466,FBgn0004167,FBgn0003520,FBgn0261385,FBgn0003475,FBgn0026192,FBgn0001301,FBgn0025742,FBgn0036372,FBgn0002873,FBgn0044823,FBgn0001624,FBgn0024814,FBgn0010341,FBgn0032105,FBgn0029688,FBgn0014029,FBgn0040208,FBgn0023172,FBgn0261873,FBgn0000017,FBgn0011225,FBgn0031799,FBgn0034180,FBgn0266669,FBgn0010909,FBgn0005536,FBgn0034408,FBgn0085443,FBgn0016081,FBgn0003041,FBg…
GO:0007351	tripartite regional subdivision	biological_process	4.391e-12	1.0885e-10	80	3767	135	12231	FBgn0004242,FBgn0040294,FBgn0000181,FBgn0026431,FBgn0015402,FBgn0004656,FBgn0261397,FBgn0004644,FBgn0002121,FBgn0003256,FBgn0016794,FBgn0014388,FBgn0031985,FBgn0004390,FBgn0015797,FBgn0004638,FBgn0003475,FBgn0021818,FBgn0003520,FBgn0004650,FBgn0004882,FBgn0037573,FBgn0000183,FBgn0260940,FBgn0038167,FBgn0010269,FBgn0000382,FBgn0027948,FBgn0262526,FBgn0004838,FBgn0262582,FBgn0004875,FBgn0259139,FBg…
GO:0008595	anterior/posterior axis specification, embryo	biological_process	4.391e-12	1.0885e-10	80	3767	135	12231	FBgn0000615,FBgn0001233,FBgn0001308,FBgn0000273,FBgn0000319,FBgn0003720,FBgn0005390,FBgn0024371,FBgn0004009,FBgn0004893,FBgn0260934,FBgn0002552,FBgn0003165,FBgn0001965,FBgn0003079,FBgn0003867,FBgn0003430,FBgn0026238,FBgn0000606,FBgn0003053,FBgn0001325,FBgn0004510,FBgn0001180,FBgn0011661,FBgn0261064,FBgn0003317,FBgn0261854,FBgn0034921,FBgn0003483,FBgn0027053,FBgn0261524,FBgn0032340,FBgn0034072,FBg…
GO:0008360	regulation of cell shape	biological_process	4.5853e-12	1.1338e-10	71	3767	115	12231	FBgn0000578,FBgn0003041,FBgn0262125,FBgn0026181,FBgn0010389,FBgn0010348,FBgn0002121,FBgn0016696,FBgn0010379,FBgn0004864,FBgn0002577,FBgn0000547,FBgn0013987,FBgn0000017,FBgn0014857,FBgn0052666,FBgn0023172,FBgn0086899,FBgn0036742,FBgn0004177,FBgn0010909,FBgn0003870,FBgn0032859,FBgn0261556,FBgn0014006,FBgn0004657,FBgn0004449,FBgn0002921,FBgn0039532,FBgn0032006,FBgn0010341,FBgn0003254,FBgn0040068,FBg…
GO:0006397	mRNA processing	biological_process	4.6391e-12	1.1442e-10	139	3767	277	12231	FBgn0031114,FBgn0260944,FBgn0036450,FBgn0261872,FBgn0050122,FBgn0035162,FBgn0036570,FBgn0035110,FBgn0029133,FBgn0005411,FBgn0035253,FBgn0029941,FBgn0000615,FBgn0001179,FBgn0033400,FBgn0001491,FBgn0034109,FBgn0038927,FBgn0005648,FBgn0017457,FBgn0005649,FBgn0260632,FBgn0037737,FBgn0261984,FBgn0039488,FBgn0261119,FBgn0265184,FBgn0022942,FBgn0037371,FBgn0014366,FBgn0034598,FBgn0004227,FBgn0263396,FBg…
GO:0007015	actin filament organization	biological_process	5.0324e-12	1.2381e-10	79	3767	133	12231	FBgn0036742,FBgn0261811,FBgn0004177,FBgn0266756,FBgn0001139,FBgn0035533,FBgn0004169,FBgn0259243,FBgn0000017,FBgn0086346,FBgn0003447,FBgn0011225,FBgn0031437,FBgn0023172,FBgn0026181,FBgn0002577,FBgn0000547,FBgn0003319,FBgn0044826,FBgn0000578,FBgn0053208,FBgn0086657,FBgn0250823,FBgn0003475,FBgn0004638,FBgn0041781,FBgn0001250,FBgn0004367,FBgn0032812,FBgn0036641,FBgn0262111,FBgn0040068,FBgn0041188,FBg…
GO:0001932	regulation of protein phosphorylation	biological_process	5.1347e-12	1.2601e-10	98	3767	177	12231	FBgn0021818,FBgn0026192,FBgn0004638,FBgn0010382,FBgn0011217,FBgn0020224,FBgn0036932,FBgn0037573,FBgn0034577,FBgn0029840,FBgn0001332,FBgn0000206,FBgn0014006,FBgn0261108,FBgn0040206,FBgn0038167,FBgn0010314,FBgn0032006,FBgn0010269,FBgn0041171,FBgn0262733,FBgn0039338,FBgn0024811,FBgn0259483,FBgn0012058,FBgn0010909,FBgn0037816,FBgn0026323,FBgn0028546,FBgn0259243,FBgn0015402,FBgn0086346,FBgn0013987,FBg…
GO:1902533	positive regulation of intracellular signal transduction	biological_process	5.7468e-12	1.4068e-10	78	3767	131	12231	FBgn0262562,FBgn0004638,FBgn0021818,FBgn0023423,FBgn0036932,FBgn0020496,FBgn0037573,FBgn0032006,FBgn0010269,FBgn0259168,FBgn0262516,FBgn0014006,FBgn0261556,FBgn0259139,FBgn0035590,FBgn0259483,FBgn0263706,FBgn0024811,FBgn0027567,FBgn0015402,FBgn0026323,FBgn0010909,FBgn0031885,FBgn0263782,FBgn0023172,FBgn0035437,FBgn0044323,FBgn0032388,FBgn0086346,FBgn0040505,FBgn0038504,FBgn0041191,FBgn0031633,FBg…
GO:0007610	behavior	biological_process	7.6311e-12	1.8633e-10	248	3767	566	12231	FBgn0264006,FBgn0031515,FBgn0004795,FBgn0037705,FBgn0036934,FBgn0085387,FBgn0045823,FBgn0261854,FBgn0000709,FBgn0035574,FBgn0266580,FBgn0022355,FBgn0003720,FBgn0265597,FBgn0053988,FBgn0001233,FBgn0000394,FBgn0026086,FBgn0000635,FBgn0004009,FBgn0263289,FBgn0004837,FBgn0002526,FBgn0053513,FBgn0264815,FBgn0002973,FBgn0020238,FBgn0026439,FBgn0003996,FBgn0263111,FBgn0086367,FBgn0003371,FBgn0264895,FBg…
GO:0008219	cell death	biological_process	8.8907e-12	2.1655e-10	152	3767	312	12231	FBgn0034967,FBgn0016078,FBgn0019972,FBgn0263237,FBgn0024329,FBgn0051005,FBgn0011766,FBgn0011739,FBgn0001086,FBgn0029891,FBgn0003943,FBgn0267698,FBgn0051216,FBgn0264493,FBgn0027609,FBgn0260936,FBgn0003731,FBgn0261793,FBgn0004436,FBgn0003118,FBgn0010113,FBgn0265297,FBgn0038325,FBgn0042693,FBgn0003965,FBgn0029093,FBgn0022027,FBgn0086706,FBgn0261268,FBgn0000273,FBgn0000319,FBgn0045035,FBgn0015331,FBg…
GO:0051225	spindle assembly	biological_process	9.7953e-12	2.3799e-10	56	3767	84	12231	FBgn0021760,FBgn0026430,FBgn0032444,FBgn0037632,FBgn0001108,FBgn0260639,FBgn0027500,FBgn0261618,FBgn0267378,FBgn0004379,FBgn0259483,FBgn0027066,FBgn0000253,FBgn0023509,FBgn0011692,FBgn0053094,FBgn0015019,FBgn0264291,FBgn0040232,FBgn0002873,FBgn0002914,FBgn0035676,FBgn0011606,FBgn0035370,FBgn0030268,FBgn0032105,FBgn0010314,FBgn0011737,FBgn0024227,FBgn0086359,FBgn0264694,FBgn0002924,FBgn0040078,FBg…
GO:0010927	cellular component assembly involved in morphogenesis	biological_process	1.0479e-11	2.5397e-10	104	3767	193	12231	FBgn0261004,FBgn0025815,FBgn0035917,FBgn0033846,FBgn0000047,FBgn0000667,FBgn0263113,FBgn0002773,FBgn0000709,FBgn0004028,FBgn0005666,FBgn0026371,FBgn0005390,FBgn0053519,FBgn0259228,FBgn0010303,FBgn0003430,FBgn0037280,FBgn0032891,FBgn0036480,FBgn0033081,FBgn0033260,FBgn0003292,FBgn0039709,FBgn0033447,FBgn0026238,FBgn0000250,FBgn0003731,FBgn0261266,FBgn0263929,FBgn0265102,FBgn0000996,FBgn0025391,FBg…
GO:0030163	protein catabolic process	biological_process	1.0843e-11	2.6213e-10	136	3767	272	12231	FBgn0052479,FBgn0012058,FBgn0260635,FBgn0031773,FBgn0033050,FBgn0020224,FBgn0035207,FBgn0036892,FBgn0030320,FBgn0023423,FBgn0010382,FBgn0024222,FBgn0029763,FBgn0002787,FBgn0015509,FBgn0003268,FBgn0261786,FBgn0027054,FBgn0044324,FBgn0003884,FBgn0035959,FBgn0003557,FBgn0002431,FBgn0035640,FBgn0032208,FBgn0028476,FBgn0033738,FBgn0034484,FBgn0038515,FBgn0086346,FBgn0031187,FBgn0030674,FBgn0061476,FBg…
GO:0006974	cellular response to DNA damage stimulus	biological_process	1.219e-11	2.9398e-10	141	3767	285	12231	FBgn0027055,FBgn0002891,FBgn0037911,FBgn0004367,FBgn0036239,FBgn0030646,FBgn0003862,FBgn0037263,FBgn0003082,FBgn0261437,FBgn0033354,FBgn0040309,FBgn0263979,FBgn0015024,FBgn0264326,FBgn0015799,FBgn0011763,FBgn0004106,FBgn0040273,FBgn0002622,FBgn0032006,FBgn0039532,FBgn0029840,FBgn0266282,FBgn0002901,FBgn0040078,FBgn0261109,FBgn0016054,FBgn0029798,FBgn0031885,FBgn0015283,FBgn0027889,FBgn0015553,FBg…
GO:0031032	actomyosin structure organization	biological_process	1.2708e-11	3.0571e-10	47	3767	66	12231	FBgn0000047,FBgn0002466,FBgn0267378,FBgn0041781,FBgn0035917,FBgn0001250,FBgn0005666,FBgn0036641,FBgn0000709,FBgn0004028,FBgn0002773,FBgn0000667,FBgn0013718,FBgn0041111,FBgn0035761,FBgn0259228,FBgn0053519,FBgn0004657,FBgn0032848,FBgn0038294,FBgn0003292,FBgn0011692,FBgn0264291,FBgn0262733,FBgn0004169,FBgn0038774,FBgn0261836,FBgn0025391,FBgn0041096,FBgn0036044,FBgn0086368,FBgn0264695,FBgn0262468,FBg…
GO:0007059	chromosome segregation	biological_process	1.2866e-11	3.0876e-10	95	3767	172	12231	FBgn0025742,FBgn0262526,FBgn0260985,FBgn0040232,FBgn0002924,FBgn0004655,FBgn0030500,FBgn0034958,FBgn0002901,FBgn0027783,FBgn0015391,FBgn0086359,FBgn0261239,FBgn0010314,FBgn0011606,FBgn0263231,FBgn0261954,FBgn0021760,FBgn0011205,FBgn0052707,FBgn0261618,FBgn0260639,FBgn0003732,FBgn0003268,FBgn0004367,FBgn0260439,FBgn0004390,FBgn0003124,FBgn0086906,FBgn0033845,FBgn0044324,FBgn0031549,FBgn0260987,FBg…
GO:0051240	positive regulation of multicellular organismal process	biological_process	1.312e-11	3.1407e-10	83	3767	144	12231	FBgn0261397,FBgn0052418,FBgn0002576,FBgn0266756,FBgn0263864,FBgn0266418,FBgn0024179,FBgn0262125,FBgn0263397,FBgn0261786,FBgn0044826,FBgn0003041,FBgn0004390,FBgn0011300,FBgn0015279,FBgn0003256,FBgn0011817,FBgn0010379,FBgn0003525,FBgn0000014,FBgn0034012,FBgn0000097,FBgn0011648,FBgn0015269,FBgn0004638,FBgn0030530,FBgn0040372,FBgn0035590,FBgn0010415,FBgn0259176,FBgn0261788,FBgn0000546,FBgn0013469,FBg…
GO:0032940	secretion by cell	biological_process	1.4631e-11	3.4939e-10	102	3767	189	12231	FBgn0028968,FBgn0031450,FBgn0030230,FBgn0266758,FBgn0260744,FBgn0003720,FBgn0013342,FBgn0264560,FBgn0031106,FBgn0026313,FBgn0030089,FBgn0266667,FBgn0000319,FBgn0001308,FBgn0259173,FBgn0259824,FBgn0039212,FBgn0000257,FBgn0260003,FBgn0030613,FBgn0013762,FBgn0028969,FBgn0004378,FBgn0004868,FBgn0035965,FBgn0038747,FBgn0031461,FBgn0027575,FBgn0264855,FBgn0053653,FBgn0028734,FBgn0053547,FBgn0011708,FBg…
GO:0032403	protein complex binding	molecular_function	1.5729e-11	3.7449e-10	91	3767	163	12231	FBgn0032042,FBgn0010215,FBgn0039925,FBgn0038223,FBgn0035638,FBgn0266579,FBgn0020503,FBgn0262519,FBgn0260991,FBgn0034957,FBgn0263076,FBgn0261387,FBgn0036059,FBgn0019968,FBgn0014133,FBgn0000490,FBgn0004381,FBgn0026059,FBgn0003545,FBgn0029903,FBgn0004374,FBgn0031955,FBgn0259173,FBgn0261261,FBgn0000667,FBgn0013718,FBgn0001123,FBgn0004378,FBgn0053558,FBgn0263197,FBgn0037702,FBgn0000351,FBgn0004379,FBg…
GO:0005794	Golgi apparatus	cellular_component	1.5759e-11	3.7449e-10	99	3767	182	12231	FBgn0004635,FBgn0003268,FBgn0003310,FBgn0011232,FBgn0267378,FBgn0027558,FBgn0000183,FBgn0052190,FBgn0027497,FBgn0031681,FBgn0031676,FBgn0024814,FBgn0033401,FBgn0263987,FBgn0029688,FBgn0030808,FBgn0035229,FBgn0037050,FBgn0037875,FBgn0033902,FBgn0044871,FBgn0031495,FBgn0265351,FBgn0010380,FBgn0051145,FBgn0263390,FBgn0031530,FBgn0262468,FBgn0033901,FBgn0010348,FBgn0029830,FBgn0020655,FBgn0261279,FBg…
GO:0044708	single-organism behavior	biological_process	1.6611e-11	3.9378e-10	188	3767	408	12231	FBgn0004837,FBgn0000635,FBgn0004009,FBgn0263289,FBgn0053988,FBgn0265597,FBgn0001233,FBgn0000394,FBgn0026086,FBgn0026439,FBgn0003996,FBgn0020238,FBgn0053513,FBgn0031515,FBgn0264006,FBgn0000709,FBgn0022355,FBgn0266580,FBgn0085387,FBgn0261854,FBgn0045823,FBgn0037705,FBgn0030600,FBgn0010051,FBgn0259246,FBgn0001208,FBgn0041100,FBgn0028734,FBgn0061469,FBgn0004227,FBgn0041184,FBgn0263111,FBgn0086367,FBg…
GO:0060341	regulation of cellular localization	biological_process	1.7677e-11	4.1803e-10	81	3767	140	12231	FBgn0000352,FBgn0038984,FBgn0004242,FBgn0000181,FBgn0013811,FBgn0022213,FBgn0000017,FBgn0011225,FBgn0261397,FBgn0004644,FBgn0002044,FBgn0016975,FBgn0010379,FBgn0264606,FBgn0023091,FBgn0052654,FBgn0263397,FBgn0262125,FBgn0250823,FBgn0038065,FBgn0003520,FBgn0030505,FBgn0037015,FBgn0267002,FBgn0261385,FBgn0032052,FBgn0029818,FBgn0026207,FBgn0023423,FBgn0000183,FBgn0001079,FBgn0024921,FBgn0045073,FBg…
GO:0016358	dendrite development	biological_process	1.9567e-11	4.6162e-10	112	3767	214	12231	FBgn0030800,FBgn0003870,FBgn0038197,FBgn0263864,FBgn0001139,FBgn0000581,FBgn0003447,FBgn0264089,FBgn0005630,FBgn0085450,FBgn0040208,FBgn0086356,FBgn0043900,FBgn0027339,FBgn0010379,FBgn0264975,FBgn0086901,FBgn0015279,FBgn0028999,FBgn0011300,FBgn0011604,FBgn0032248,FBgn0038742,FBgn0000578,FBgn0028993,FBgn0016081,FBgn0262125,FBgn0025463,FBgn0264442,FBgn0024179,FBgn0014018,FBgn0028387,FBgn0053208,FBg…
GO:0046903	secretion	biological_process	1.9899e-11	4.6831e-10	105	3767	197	12231	FBgn0005586,FBgn0259246,FBgn0266671,FBgn0086784,FBgn0029709,FBgn0031461,FBgn0027575,FBgn0053547,FBgn0264855,FBgn0053653,FBgn0011708,FBgn0028734,FBgn0024833,FBgn0011202,FBgn0004179,FBgn0028582,FBgn0263111,FBgn0027363,FBgn0024234,FBgn0030503,FBgn0000115,FBgn0030341,FBgn0086674,FBgn0036141,FBgn0266758,FBgn0260744,FBgn0003720,FBgn0013342,FBgn0264560,FBgn0031106,FBgn0026313,FBgn0030089,FBgn0266667,FBg…
GO:0005543	phospholipid binding	molecular_function	2.0096e-11	4.7182e-10	56	3767	85	12231	FBgn0011661,FBgn0038065,FBgn0037702,FBgn0038747,FBgn0002938,FBgn0267378,FBgn0037648,FBgn0053558,FBgn0051158,FBgn0086372,FBgn0004167,FBgn0031534,FBgn0027574,FBgn0000083,FBgn0015278,FBgn0025381,FBgn0002932,FBgn0030230,FBgn0053094,FBgn0036372,FBgn0037280,FBgn0039056,FBgn0050372,FBgn0032005,FBgn0266667,FBgn0261983,FBgn0260798,FBgn0003218,FBgn0266758,FBgn0004387,FBgn0034265,FBgn0262468,FBgn0033075,FBg…
GO:0032535	regulation of cellular component size	biological_process	2.3771e-11	5.5678e-10	67	3767	109	12231	FBgn0000083,FBgn0000464,FBgn0035411,FBgn0038747,FBgn0021796,FBgn0015806,FBgn0021814,FBgn0026317,FBgn0041111,FBgn0037491,FBgn0046704,FBgn0037874,FBgn0267390,FBgn0003502,FBgn0261560,FBgn0039709,FBgn0001150,FBgn0052380,FBgn0264598,FBgn0264272,FBgn0036368,FBgn0024329,FBgn0005198,FBgn0261524,FBgn0025743,FBgn0031781,FBgn0011708,FBgn0019990,FBgn0020386,FBgn0014133,FBgn0011202,FBgn0034585,FBgn0004167,FBg…
GO:0032270	positive regulation of cellular protein metabolic process	biological_process	2.437e-11	5.6943e-10	91	3767	164	12231	FBgn0262733,FBgn0262526,FBgn0004838,FBgn0033902,FBgn0024811,FBgn0261014,FBgn0015024,FBgn0260635,FBgn0259483,FBgn0014006,FBgn0029840,FBgn0086359,FBgn0263933,FBgn0010269,FBgn0010314,FBgn0032006,FBgn0261108,FBgn0036932,FBgn0037573,FBgn0004882,FBgn0001079,FBgn0004638,FBgn0026083,FBgn0021818,FBgn0003520,FBgn0011300,FBgn0037093,FBgn0086657,FBgn0041707,FBgn0016081,FBgn0031633,FBgn0003256,FBgn0028426,FBg…
GO:0001700	embryonic development via the syncytial blastoderm	biological_process	2.6003e-11	6.0614e-10	96	3767	176	12231	FBgn0000499,FBgn0003507,FBgn0000723,FBgn0020392,FBgn0011202,FBgn0000490,FBgn0030018,FBgn0000299,FBgn0267488,FBgn0003731,FBgn0024234,FBgn0004102,FBgn0003499,FBgn0267698,FBgn0000449,FBgn0259212,FBgn0051992,FBgn0086357,FBgn0000615,FBgn0024189,FBgn0003502,FBgn0011737,FBgn0264959,FBgn0000405,FBgn0004009,FBgn0263289,FBgn0004856,FBgn0003169,FBgn0010303,FBgn0003165,FBgn0002441,FBgn0031882,FBgn0027066,FBg…
GO:0090130	tissue migration	biological_process	2.8814e-11	6.7006e-10	90	3767	162	12231	FBgn0010303,FBgn0266521,FBgn0039232,FBgn0003079,FBgn0031450,FBgn0086677,FBgn0267390,FBgn0260934,FBgn0031304,FBgn0011723,FBgn0022764,FBgn0053558,FBgn0001180,FBgn0003416,FBgn0020251,FBgn0000490,FBgn0263396,FBgn0032409,FBgn0036059,FBgn0011739,FBgn0000499,FBgn0034009,FBgn0015754,FBgn0266671,FBgn0043903,FBgn0264695,FBgn0261285,FBgn0261456,FBgn0020620,FBgn0001320,FBgn0032363,FBgn0003499,FBgn0041096,FBg…
GO:0009948	anterior/posterior axis specification	biological_process	2.8883e-11	6.7008e-10	81	3767	141	12231	FBgn0260632,FBgn0003118,FBgn0003731,FBgn0000163,FBgn0001150,FBgn0016034,FBgn0263102,FBgn0004102,FBgn0001321,FBgn0001320,FBgn0034921,FBgn0003483,FBgn0027053,FBgn0032340,FBgn0261524,FBgn0034072,FBgn0000490,FBgn0263396,FBgn0000251,FBgn0005695,FBgn0001325,FBgn0003053,FBgn0000606,FBgn0004510,FBgn0001180,FBgn0011661,FBgn0261064,FBgn0003317,FBgn0261854,FBgn0000615,FBgn0001308,FBgn0001233,FBgn0000273,FBg…
GO:0065003	macromolecular complex assembly	biological_process	2.9078e-11	6.7299e-10	183	3767	397	12231	FBgn0030268,FBgn0262743,FBgn0029094,FBgn0001308,FBgn0013756,FBgn0003502,FBgn0031450,FBgn0086690,FBgn0037760,FBgn0027066,FBgn0263220,FBgn0263352,FBgn0001108,FBgn0038747,FBgn0037135,FBgn0003386,FBgn0004379,FBgn0037758,FBgn0032444,FBgn0000535,FBgn0024285,FBgn0015754,FBgn0262467,FBgn0024329,FBgn0003483,FBgn0034921,FBgn0032340,FBgn0011764,FBgn0015282,FBgn0003495,FBgn0011207,FBgn0033886,FBgn0022893,FBg…
GO:0048469	cell maturation	biological_process	2.9385e-11	6.7849e-10	87	3767	155	12231	FBgn0004510,FBgn0029092,FBgn0261854,FBgn0261064,FBgn0011661,FBgn0260934,FBgn0040283,FBgn0025638,FBgn0024371,FBgn0003089,FBgn0001308,FBgn0001233,FBgn0000319,FBgn0000273,FBgn0000615,FBgn0020238,FBgn0026238,FBgn0263102,FBgn0016034,FBgn0263929,FBgn0000163,FBgn0003731,FBgn0005612,FBgn0261458,FBgn0000259,FBgn0000711,FBgn0034072,FBgn0262467,FBgn0015754,FBgn0032340,FBgn0261524,FBgn0027053,FBgn0034921,FBg…
GO:0071310	cellular response to organic substance	biological_process	3.2794e-11	7.5543e-10	102	3767	191	12231	FBgn0000568,FBgn0000382,FBgn0010341,FBgn0032006,FBgn0261239,FBgn0020299,FBgn0001332,FBgn0031260,FBgn0039861,FBgn0040372,FBgn0029006,FBgn0085484,FBgn0000546,FBgn0035499,FBgn0033062,FBgn0015509,FBgn0037015,FBgn0020493,FBgn0012051,FBgn0015240,FBgn0032642,FBgn0031745,FBgn0023423,FBgn0036932,FBgn0001079,FBgn0011648,FBgn0034012,FBgn0014388,FBgn0010583,FBgn0016917,FBgn0086371,FBgn0015381,FBgn0015279,FBg…
GO:0031988	membrane-bounded vesicle	cellular_component	3.3488e-11	7.6959e-10	80	3767	139	12231	FBgn0000183,FBgn0260964,FBgn0032812,FBgn0086372,FBgn0033460,FBgn0031455,FBgn0262518,FBgn0265351,FBgn0035321,FBgn0010380,FBgn0086916,FBgn0028484,FBgn0024814,FBgn0016797,FBgn0266719,FBgn0024509,FBgn0034691,FBgn0004644,FBgn0266757,FBgn0011225,FBgn0026378,FBgn0035533,FBgn0266756,FBgn0004242,FBgn0035060,FBgn0000352,FBgn0003210,FBgn0025725,FBgn0262125,FBgn0085443,FBgn0015797,FBgn0041707,FBgn0001087,FBg…
GO:0050767	regulation of neurogenesis	biological_process	3.4454e-11	7.8993e-10	83	3767	146	12231	FBgn0266450,FBgn0029688,FBgn0010341,FBgn0000382,FBgn0262866,FBgn0001235,FBgn0013469,FBgn0041171,FBgn0002932,FBgn0259176,FBgn0039234,FBgn0040372,FBgn0026375,FBgn0031005,FBgn0004638,FBgn0267002,FBgn0000097,FBgn0034012,FBgn0011217,FBgn0002783,FBgn0025741,FBgn0023423,FBgn0030276,FBgn0010379,FBgn0002121,FBgn0003256,FBgn0026181,FBgn0000547,FBgn0014388,FBgn0015279,FBgn0086901,FBgn0085447,FBgn0004390,FBg…
GO:0045934	negative regulation of nucleobase-containing compound metabolic process	biological_process	3.9442e-11	9.0217e-10	152	3767	317	12231	FBgn0005624,FBgn0032929,FBgn0017430,FBgn0265523,FBgn0261823,FBgn0003330,FBgn0005695,FBgn0263396,FBgn0003042,FBgn0030366,FBgn0001150,FBgn0262519,FBgn0261573,FBgn0260632,FBgn0037607,FBgn0001320,FBgn0013263,FBgn0037376,FBgn0025825,FBgn0086908,FBgn0261456,FBgn0004102,FBgn0004009,FBgn0045759,FBgn0004837,FBgn0260446,FBgn0264075,FBgn0002906,FBgn0002441,FBgn0261963,FBgn0029504,FBgn0020309,FBgn0003430,FBg…
GO:0031570	DNA integrity checkpoint	biological_process	3.9757e-11	9.0725e-10	56	3767	86	12231	FBgn0040347,FBgn0028837,FBgn0027055,FBgn0004855,FBgn0023213,FBgn0036239,FBgn0003732,FBgn0004367,FBgn0015509,FBgn0037263,FBgn0261437,FBgn0020270,FBgn0033354,FBgn0038827,FBgn0020238,FBgn0033260,FBgn0029504,FBgn0027057,FBgn0015799,FBgn0260985,FBgn0039710,FBgn0040273,FBgn0014340,FBgn0004106,FBgn0085436,FBgn0261617,FBgn0037874,FBgn0002901,FBgn0045035,FBgn0040078,FBgn0027338,FBgn0031885,FBgn0038016,FBg…
GO:0021700	developmental maturation	biological_process	4.2671e-11	9.7149e-10	98	3767	182	12231	FBgn0261397,FBgn0000533,FBgn0002926,FBgn0030343,FBgn0003450,FBgn0041775,FBgn0259243,FBgn0026431,FBgn0004242,FBgn0040294,FBgn0000181,FBgn0015797,FBgn0086657,FBgn0053208,FBgn0260987,FBgn0031985,FBgn0031866,FBgn0086371,FBgn0015279,FBgn0264975,FBgn0026181,FBgn0013997,FBgn0002121,FBgn0031702,FBgn0037573,FBgn0023423,FBgn0004882,FBgn0000183,FBgn0021760,FBgn0086362,FBgn0011217,FBgn0034012,FBgn0015509,FBg…
GO:0001667	ameboidal-type cell migration	biological_process	4.4733e-11	1.0161e-09	90	3767	163	12231	FBgn0003416,FBgn0053558,FBgn0001180,FBgn0022764,FBgn0031304,FBgn0011723,FBgn0260934,FBgn0267390,FBgn0086677,FBgn0031450,FBgn0003079,FBgn0039232,FBgn0010303,FBgn0266521,FBgn0000163,FBgn0027363,FBgn0041184,FBgn0005638,FBgn0003118,FBgn0003731,FBgn0041096,FBgn0001320,FBgn0003499,FBgn0032363,FBgn0020620,FBgn0261285,FBgn0264695,FBgn0261456,FBgn0015754,FBgn0266671,FBgn0043903,FBgn0034009,FBgn0011739,FBg…
GO:0040029	regulation of gene expression, epigenetic	biological_process	4.6709e-11	1.0585e-09	81	3767	142	12231	FBgn0037376,FBgn0025825,FBgn0260936,FBgn0030891,FBgn0086908,FBgn0003567,FBgn0250816,FBgn0037607,FBgn0013263,FBgn0032515,FBgn0010113,FBgn0263102,FBgn0030366,FBgn0000139,FBgn0025639,FBgn0026722,FBgn0000212,FBgn0003042,FBgn0022238,FBgn0032340,FBgn0261823,FBgn0003330,FBgn0034921,FBgn0003483,FBgn0022942,FBgn0005624,FBgn0020306,FBgn0024183,FBgn0032929,FBgn0002521,FBgn0002775,FBgn0040071,FBgn0011837,FBg…
GO:0008380	RNA splicing	biological_process	5.1196e-11	1.1575e-09	123	3767	244	12231	FBgn0024542,FBgn0017457,FBgn0005649,FBgn0005648,FBgn0039566,FBgn0027548,FBgn0265574,FBgn0038927,FBgn0034109,FBgn0036386,FBgn0033859,FBgn0033688,FBgn0001491,FBgn0033400,FBgn0004856,FBgn0001179,FBgn0029094,FBgn0014870,FBgn0000615,FBgn0023216,FBgn0029941,FBgn0035253,FBgn0005411,FBgn0015331,FBgn0029133,FBgn0024285,FBgn0050122,FBgn0035162,FBgn0031493,FBgn0261872,FBgn0000543,FBgn0033339,FBgn0260944,FBg…
GO:0017111	nucleoside-triphosphatase activity	molecular_function	5.5796e-11	1.2586e-09	242	3767	559	12231	FBgn0039966,FBgn0002901,FBgn0086895,FBgn0027783,FBgn0014029,FBgn0002567,FBgn0040078,FBgn0002924,FBgn0266557,FBgn0011606,FBgn0010341,FBgn0002921,FBgn0039532,FBgn0040232,FBgn0262526,FBgn0036702,FBgn0026479,FBgn0263599,FBgn0261014,FBgn0039244,FBgn0032882,FBgn0030011,FBgn0035357,FBgn0015324,FBgn0003261,FBgn0001565,FBgn0037391,FBgn0004581,FBgn0035918,FBgn0030672,FBgn0036980,FBgn0086362,FBgn0032167,FBg…
GO:0050807	regulation of synapse organization	biological_process	6.1464e-11	1.3832e-09	64	3767	104	12231	FBgn0259174,FBgn0050021,FBgn0034789,FBgn0002526,FBgn0003165,FBgn0000635,FBgn0264959,FBgn0032956,FBgn0010300,FBgn0264607,FBgn0003317,FBgn0260386,FBgn0024836,FBgn0013762,FBgn0038747,FBgn0037884,FBgn0028734,FBgn0024277,FBgn0011571,FBgn0030600,FBgn0036257,FBgn0005198,FBgn0267698,FBgn0034265,FBgn0034646,FBgn0039213,FBgn0263111,FBgn0003371,FBgn0040281,FBgn0024234,FBgn0020440,FBgn0010415,FBgn0259483,FBg…
GO:0051963	regulation of synapse assembly	biological_process	6.4551e-11	1.4494e-09	58	3767	91	12231	FBgn0013762,FBgn0015269,FBgn0267002,FBgn0266053,FBgn0020493,FBgn0038747,FBgn0003317,FBgn0011648,FBgn0034135,FBgn0024836,FBgn0010341,FBgn0000635,FBgn0264959,FBgn0038063,FBgn0032956,FBgn0259108,FBgn0001624,FBgn0264607,FBgn0029840,FBgn0010300,FBgn0267350,FBgn0259483,FBgn0010415,FBgn0034789,FBgn0259174,FBgn0050021,FBgn0003165,FBgn0053094,FBgn0002526,FBgn0261788,FBgn0262733,FBgn0039213,FBgn0035533,FBg…
GO:0010557	positive regulation of macromolecule biosynthetic process	biological_process	6.5459e-11	1.4664e-09	149	3767	311	12231	FBgn0003870,FBgn0000320,FBgn0015829,FBgn0004644,FBgn0011289,FBgn0004656,FBgn0002576,FBgn0023091,FBgn0041191,FBgn0000448,FBgn0015919,FBgn0011604,FBgn0261647,FBgn0026083,FBgn0020279,FBgn0002783,FBgn0022740,FBgn0000014,FBgn0002985,FBgn0011648,FBgn0011715,FBgn0019650,FBgn0028926,FBgn0023076,FBgn0003687,FBgn0001222,FBgn0004170,FBgn0014340,FBgn0002914,FBgn0004618,FBgn0259789,FBgn0010433,FBgn0003118,FBg…
GO:0048813	dendrite morphogenesis	biological_process	6.8276e-11	1.526e-09	109	3767	210	12231	FBgn0086680,FBgn0000139,FBgn0034697,FBgn0005636,FBgn0264922,FBgn0061469,FBgn0031006,FBgn0028734,FBgn0000212,FBgn0250820,FBgn0264954,FBgn0025360,FBgn0035713,FBgn0011766,FBgn0011739,FBgn0004913,FBgn0011592,FBgn0004652,FBgn0086358,FBgn0020306,FBgn0015754,FBgn0016047,FBgn0053193,FBgn0005561,FBgn0266711,FBgn0004859,FBgn0005612,FBgn0001320,FBgn0262519,FBgn0000541,FBgn0045852,FBgn0010433,FBgn0033413,FBg…
GO:0051253	negative regulation of RNA metabolic process	biological_process	7.1976e-11	1.605e-09	145	3767	301	12231	FBgn0020496,FBgn0002985,FBgn0003732,FBgn0000283,FBgn0032475,FBgn0031903,FBgn0001222,FBgn0023509,FBgn0039338,FBgn0036915,FBgn0027620,FBgn0028926,FBgn0259938,FBgn0023076,FBgn0085450,FBgn0004656,FBgn0002576,FBgn0035769,FBgn0034261,FBgn0003870,FBgn0001139,FBgn0027950,FBgn0029800,FBgn0002733,FBgn0011604,FBgn0010416,FBgn0010825,FBgn0000448,FBgn0038872,FBgn0002044,FBgn0036134,FBgn0002521,FBgn0002775,FBg…
GO:0000086	G2/M transition of mitotic cell cycle	biological_process	7.7497e-11	1.7242e-09	56	3767	87	12231	FBgn0015625,FBgn0027338,FBgn0040066,FBgn0033897,FBgn0038016,FBgn0020633,FBgn0267351,FBgn0000541,FBgn0003731,FBgn0003612,FBgn0262527,FBgn0002878,FBgn0000064,FBgn0003277,FBgn0027054,FBgn0004419,FBgn0026143,FBgn0261278,FBgn0038578,FBgn0050342,FBgn0011785,FBgn0261850,FBgn0027053,FBgn0017550,FBgn0052251,FBgn0010173,FBgn0037327,FBgn0003525,FBgn0040347,FBgn0004855,FBgn0027055,FBgn0028837,FBgn0023213,FBg…
GO:0008289	lipid binding	molecular_function	8.0618e-11	1.7845e-09	89	3767	162	12231	FBgn0040475,FBgn0032136,FBgn0011202,FBgn0037884,FBgn0033463,FBgn0261549,FBgn0000499,FBgn0000723,FBgn0261550,FBgn0264598,FBgn0033244,FBgn0033075,FBgn0034265,FBgn0020930,FBgn0035028,FBgn0259680,FBgn0000163,FBgn0032513,FBgn0036289,FBgn0037280,FBgn0030230,FBgn0050392,FBgn0032785,FBgn0039056,FBgn0260798,FBgn0261983,FBgn0266667,FBgn0266758,FBgn0011661,FBgn0037648,FBgn0002938,FBgn0038747,FBgn0035849,FBg…
GO:0007169	transmembrane receptor protein tyrosine kinase signaling pathway	biological_process	8.0672e-11	1.7845e-09	89	3767	162	12231	FBgn0023441,FBgn0039402,FBgn0020248,FBgn0001321,FBgn0010433,FBgn0001150,FBgn0027363,FBgn0020440,FBgn0041184,FBgn0003118,FBgn0003731,FBgn0015296,FBgn0029791,FBgn0085407,FBgn0000212,FBgn0020251,FBgn0020386,FBgn0043884,FBgn0005198,FBgn0038755,FBgn0053531,FBgn0021814,FBgn0026317,FBgn0015399,FBgn0003416,FBgn0001180,FBgn0010407,FBgn0003053,FBgn0033081,FBgn0031450,FBgn0011573,FBgn0002552,FBgn0003165,FBg…
GO:0009792	embryo development ending in birth or egg hatching	biological_process	8.0755e-11	1.7845e-09	99	3767	186	12231	FBgn0004638,FBgn0004367,FBgn0000283,FBgn0020621,FBgn0003254,FBgn0011648,FBgn0000097,FBgn0032812,FBgn0020496,FBgn0036165,FBgn0040068,FBgn0004606,FBgn0004657,FBgn0028484,FBgn0038167,FBgn0011715,FBgn0002921,FBgn0001624,FBgn0039532,FBgn0020261,FBgn0010341,FBgn0262733,FBgn0000546,FBgn0015589,FBgn0262582,FBgn0029006,FBgn0005640,FBgn0026323,FBgn0015075,FBgn0010909,FBgn0040294,FBgn0003388,FBgn0014343,FBg…
GO:0045892	negative regulation of transcription, DNA-templated	biological_process	9.2884e-11	2.0386e-09	140	3767	289	12231	FBgn0014343,FBgn0010575,FBgn0030082,FBgn0000352,FBgn0022361,FBgn0038197,FBgn0264442,FBgn0028387,FBgn0039227,FBgn0026573,FBgn0003044,FBgn0262739,FBgn0027339,FBgn0036964,FBgn0000504,FBgn0016756,FBgn0000097,FBgn0000629,FBgn0002573,FBgn0020307,FBgn0035357,FBgn0004360,FBgn0040318,FBgn0000546,FBgn0040273,FBgn0003028,FBgn0015799,FBgn0262582,FBgn0042085,FBgn0263979,FBgn0004897,FBgn0261648,FBgn0004606,FBg…
GO:1902679	negative regulation of RNA biosynthetic process	biological_process	9.2884e-11	2.0386e-09	140	3767	289	12231	FBgn0039227,FBgn0026573,FBgn0003044,FBgn0262739,FBgn0027339,FBgn0036964,FBgn0000504,FBgn0264442,FBgn0028387,FBgn0000352,FBgn0022361,FBgn0038197,FBgn0014343,FBgn0010575,FBgn0030082,FBgn0261648,FBgn0004606,FBgn0000018,FBgn0262166,FBgn0266557,FBgn0051716,FBgn0040318,FBgn0000546,FBgn0040273,FBgn0003028,FBgn0015799,FBgn0262582,FBgn0042085,FBgn0004897,FBgn0263979,FBgn0004360,FBgn0035357,FBgn0016756,FBg…
GO:1903507	negative regulation of nucleic acid-templated transcription	biological_process	9.2884e-11	2.0386e-09	140	3767	289	12231	FBgn0002576,FBgn0004656,FBgn0035769,FBgn0034261,FBgn0085450,FBgn0027950,FBgn0029800,FBgn0002733,FBgn0003870,FBgn0001139,FBgn0011604,FBgn0010416,FBgn0000448,FBgn0038872,FBgn0010825,FBgn0002985,FBgn0020496,FBgn0000283,FBgn0003732,FBgn0032475,FBgn0027620,FBgn0039338,FBgn0036915,FBgn0023509,FBgn0001222,FBgn0031903,FBgn0023076,FBgn0259938,FBgn0028926,FBgn0014143,FBgn0260936,FBgn0004859,FBgn0017578,FBg…
GO:0000377	RNA splicing, via transesterification reactions with bulged adenosine as nucleophile	biological_process	1.0148e-10	2.2174e-09	117	3767	231	12231	FBgn0024998,FBgn0086895,FBgn0003742,FBgn0023506,FBgn0265998,FBgn0028919,FBgn0037466,FBgn0033089,FBgn0036915,FBgn0263599,FBgn0004838,FBgn0037344,FBgn0012058,FBgn0031456,FBgn0031492,FBgn0030365,FBgn0036487,FBgn0003261,FBgn0004237,FBgn0033062,FBgn0000662,FBgn0030625,FBgn0027617,FBgn0010220,FBgn0030468,FBgn0039229,FBgn0021895,FBgn0031601,FBgn0086444,FBgn0036850,FBgn0037573,FBgn0030631,FBgn0036641,FBg…
GO:0000398	mRNA splicing, via spliceosome	biological_process	1.0148e-10	2.2174e-09	117	3767	231	12231	FBgn0015818,FBgn0032248,FBgn0261933,FBgn0037220,FBgn0261068,FBgn0050342,FBgn0036277,FBgn0263198,FBgn0266917,FBgn0033210,FBgn0262735,FBgn0000504,FBgn0010774,FBgn0011305,FBgn0267791,FBgn0261641,FBgn0039920,FBgn0022959,FBgn0030915,FBgn0036207,FBgn0051922,FBgn0032388,FBgn0000114,FBgn0025571,FBgn0033160,FBgn0015075,FBgn0086683,FBgn0037466,FBgn0033089,FBgn0036915,FBgn0263599,FBgn0031456,FBgn0012058,FBg…
GO:0016818	hydrolase activity, acting on acid anhydrides, in phosphorus-containing anhydrides	molecular_function	1.0772e-10	2.3485e-09	247	3767	576	12231	FBgn0004581,FBgn0035918,FBgn0037391,FBgn0036980,FBgn0030672,FBgn0086362,FBgn0035357,FBgn0015324,FBgn0003261,FBgn0001565,FBgn0036702,FBgn0040232,FBgn0262526,FBgn0026479,FBgn0039244,FBgn0032882,FBgn0261014,FBgn0263599,FBgn0030011,FBgn0086895,FBgn0002901,FBgn0027783,FBgn0039966,FBgn0002924,FBgn0040078,FBgn0014029,FBgn0002567,FBgn0011606,FBgn0266557,FBgn0010341,FBgn0039532,FBgn0002921,FBgn0027836,FBg…
GO:0016462	pyrophosphatase activity	molecular_function	1.1395e-10	2.4788e-09	244	3767	568	12231	FBgn0259923,FBgn0026259,FBgn0033661,FBgn0000115,FBgn0039925,FBgn0016693,FBgn0038344,FBgn0020633,FBgn0262515,FBgn0011211,FBgn0039213,FBgn0020255,FBgn0004556,FBgn0038224,FBgn0026713,FBgn0030877,FBgn0036888,FBgn0000212,FBgn0031540,FBgn0015282,FBgn0051118,FBgn0019968,FBgn0035842,FBgn0040299,FBgn0005586,FBgn0026059,FBgn0020306,FBgn0015754,FBgn0003483,FBgn0004913,FBgn0010246,FBgn0004374,FBgn0015331,FBg…
GO:0004842	ubiquitin-protein transferase activity	molecular_function	1.1617e-10	2.5214e-09	108	3767	209	12231	FBgn0260866,FBgn0051721,FBgn0036621,FBgn0260794,FBgn0039875,FBgn0035953,FBgn0259174,FBgn0037760,FBgn0017418,FBgn0035983,FBgn0261268,FBgn0037653,FBgn0025638,FBgn0034109,FBgn0034231,FBgn0037705,FBgn0000173,FBgn0037236,FBgn0038286,FBgn0030863,FBgn0039667,FBgn0026316,FBgn0020257,FBgn0036516,FBgn0058045,FBgn0052085,FBgn0030809,FBgn0027512,FBgn0032467,FBgn0031384,FBgn0003410,FBgn0034989,FBgn0264848,FBg…
GO:0012501	programmed cell death	biological_process	1.2461e-10	2.6986e-09	140	3767	290	12231	FBgn0015589,FBgn0000546,FBgn0011763,FBgn0015799,FBgn0261985,FBgn0034763,FBgn0033902,FBgn0261014,FBgn0260940,FBgn0001332,FBgn0259108,FBgn0032006,FBgn0002622,FBgn0033483,FBgn0261108,FBgn0033988,FBgn0030941,FBgn0002573,FBgn0031851,FBgn0260746,FBgn0261618,FBgn0243511,FBgn0266717,FBgn0031392,FBgn0086657,FBgn0036237,FBgn0013726,FBgn0010379,FBgn0001324,FBgn0000567,FBgn0085397,FBgn0005630,FBgn0028406,FBg…
GO:0045927	positive regulation of growth	biological_process	1.3242e-10	2.8614e-09	52	3767	79	12231	FBgn0035590,FBgn0015218,FBgn0010415,FBgn0020238,FBgn0261788,FBgn0259176,FBgn0053094,FBgn0039904,FBgn0003867,FBgn0263933,FBgn0001624,FBgn0037874,FBgn0259168,FBgn0266557,FBgn0038063,FBgn0011642,FBgn0003317,FBgn0015806,FBgn0036934,FBgn0266848,FBgn0034012,FBgn0011648,FBgn0015269,FBgn0003416,FBgn0038747,FBgn0030530,FBgn0021796,FBgn0024277,FBgn0024179,FBgn0037884,FBgn0020386,FBgn0264785,FBgn0261786,FBg…
GO:0044774	mitotic DNA integrity checkpoint	biological_process	1.4125e-10	3.0454e-09	51	3767	77	12231	FBgn0017550,FBgn0027053,FBgn0010173,FBgn0052251,FBgn0038578,FBgn0011785,FBgn0261278,FBgn0026143,FBgn0027054,FBgn0004419,FBgn0002878,FBgn0000064,FBgn0003277,FBgn0262527,FBgn0000541,FBgn0003612,FBgn0267351,FBgn0020633,FBgn0040066,FBgn0033897,FBgn0015546,FBgn0038016,FBgn0031885,FBgn0027338,FBgn0040078,FBgn0045035,FBgn0002901,FBgn0037874,FBgn0085436,FBgn0004106,FBgn0039710,FBgn0040273,FBgn0015799,FBg…
GO:0000375	RNA splicing, via transesterification reactions	biological_process	1.4247e-10	3.0649e-09	117	3767	232	12231	FBgn0086683,FBgn0015075,FBgn0033160,FBgn0025571,FBgn0000114,FBgn0051922,FBgn0036207,FBgn0032388,FBgn0030915,FBgn0039920,FBgn0022959,FBgn0010774,FBgn0000504,FBgn0261641,FBgn0267791,FBgn0011305,FBgn0266917,FBgn0262735,FBgn0033210,FBgn0263198,FBgn0036277,FBgn0050342,FBgn0261068,FBgn0037220,FBgn0261933,FBgn0015818,FBgn0032248,FBgn0000662,FBgn0033062,FBgn0004237,FBgn0003261,FBgn0036487,FBgn0030365,FBg…
GO:0007155	cell adhesion	biological_process	1.4409e-10	3.093e-09	115	3767	227	12231	FBgn0267435,FBgn0004177,FBgn0040294,FBgn0001122,FBgn0086899,FBgn0004397,FBgn0265296,FBgn0010434,FBgn0052666,FBgn0013987,FBgn0264089,FBgn0033901,FBgn0014857,FBgn0027562,FBgn0264975,FBgn0262114,FBgn0262742,FBgn0000547,FBgn0002577,FBgn0043900,FBgn0026562,FBgn0035101,FBgn0016696,FBgn0025879,FBgn0013997,FBgn0010348,FBgn0051004,FBgn0262125,FBgn0260004,FBgn0036715,FBgn0000221,FBgn0038439,FBgn0003041,FBg…
GO:0044839	cell cycle G2/M phase transition	biological_process	1.5112e-10	3.2367e-09	58	3767	92	12231	FBgn0028837,FBgn0027055,FBgn0004855,FBgn0040347,FBgn0037327,FBgn0003525,FBgn0023213,FBgn0015509,FBgn0036239,FBgn0003732,FBgn0004367,FBgn0020270,FBgn0261437,FBgn0033354,FBgn0037263,FBgn0000404,FBgn0033260,FBgn0020238,FBgn0002914,FBgn0040273,FBgn0039710,FBgn0004106,FBgn0027057,FBgn0015799,FBgn0037874,FBgn0085436,FBgn0000405,FBgn0040078,FBgn0002901,FBgn0045035,FBgn0027338,FBgn0015625,FBgn0020633,FBg…
GO:0016817	hydrolase activity, acting on acid anhydrides	molecular_function	1.6023e-10	3.4243e-09	247	3767	578	12231	FBgn0039403,FBgn0015391,FBgn0031734,FBgn0003218,FBgn0020235,FBgn0039338,FBgn0039588,FBgn0260985,FBgn0085190,FBgn0015019,FBgn0038916,FBgn0011659,FBgn0000559,FBgn0003392,FBgn0035255,FBgn0030088,FBgn0029870,FBgn0262518,FBgn0010747,FBgn0032456,FBgn0022787,FBgn0000384,FBgn0002542,FBgn0267002,FBgn0042712,FBgn0260639,FBgn0003732,FBgn0019644,FBgn0036018,FBgn0036104,FBgn0263231,FBgn0036892,FBgn0010220,FBg…
GO:0019941	modification-dependent protein catabolic process	biological_process	1.6134e-10	3.4407e-09	124	3767	250	12231	FBgn0039632,FBgn0044324,FBgn0031549,FBgn0035959,FBgn0003884,FBgn0023511,FBgn0261786,FBgn0035402,FBgn0027054,FBgn0035640,FBgn0031107,FBgn0032208,FBgn0034484,FBgn0028476,FBgn0033738,FBgn0003557,FBgn0002431,FBgn0015283,FBgn0033486,FBgn0031187,FBgn0061476,FBgn0030674,FBgn0038515,FBgn0086346,FBgn0029819,FBgn0034704,FBgn0038862,FBgn0026326,FBgn0036196,FBgn0040294,FBgn0039348,FBgn0029006,FBgn0012058,FBg…
GO:0019787	ubiquitin-like protein transferase activity	molecular_function	1.6995e-10	3.6164e-09	112	3767	220	12231	FBgn0262699,FBgn0261119,FBgn0038686,FBgn0023528,FBgn0036897,FBgn0037781,FBgn0052350,FBgn0027609,FBgn0039668,FBgn0023097,FBgn0037659,FBgn0267351,FBgn0004436,FBgn0061469,FBgn0261931,FBgn0027052,FBgn0015320,FBgn0033639,FBgn0264848,FBgn0034989,FBgn0003410,FBgn0032467,FBgn0031384,FBgn0033544,FBgn0035233,FBgn0030600,FBgn0041100,FBgn0001086,FBgn0003330,FBgn0039667,FBgn0030863,FBgn0038286,FBgn0037236,FBg…
GO:0031267	small GTPase binding	molecular_function	1.7494e-10	3.7145e-09	47	3767	69	12231	FBgn0262743,FBgn0024921,FBgn0267795,FBgn0036333,FBgn0086757,FBgn0044823,FBgn0030230,FBgn0042177,FBgn0037894,FBgn0031456,FBgn0267378,FBgn0031745,FBgn0015278,FBgn0034585,FBgn0053139,FBgn0261532,FBgn0041582,FBgn0025802,FBgn0266572,FBgn0000183,FBgn0261064,FBgn0026181,FBgn0052654,FBgn0262114,FBgn0038504,FBgn0039302,FBgn0033984,FBgn0027335,FBgn0011202,FBgn0034697,FBgn0027287,FBgn0085443,FBgn0026056,FBg…
GO:0044257	cellular protein catabolic process	biological_process	1.8716e-10	3.9566e-09	125	3767	253	12231	FBgn0038438,FBgn0027053,FBgn0041100,FBgn0001086,FBgn0029891,FBgn0061469,FBgn0033639,FBgn0264848,FBgn0015282,FBgn0033916,FBgn0050421,FBgn0033886,FBgn0034989,FBgn0016697,FBgn0086134,FBgn0032467,FBgn0031384,FBgn0030366,FBgn0003410,FBgn0050382,FBgn0037659,FBgn0003371,FBgn0267351,FBgn0004436,FBgn0262699,FBgn0039214,FBgn0036897,FBgn0029512,FBgn0000063,FBgn0039402,FBgn0260936,FBgn0027609,FBgn0266711,FBg…
GO:0051603	proteolysis involved in cellular protein catabolic process	biological_process	1.8716e-10	3.9566e-09	125	3767	253	12231	FBgn0038438,FBgn0041100,FBgn0027053,FBgn0029891,FBgn0001086,FBgn0061469,FBgn0033639,FBgn0264848,FBgn0015282,FBgn0033916,FBgn0034989,FBgn0050421,FBgn0033886,FBgn0016697,FBgn0032467,FBgn0086134,FBgn0030366,FBgn0031384,FBgn0003410,FBgn0050382,FBgn0037659,FBgn0003371,FBgn0267351,FBgn0004436,FBgn0262699,FBgn0039214,FBgn0029512,FBgn0036897,FBgn0000063,FBgn0039402,FBgn0027609,FBgn0260936,FBgn0266711,FBg…
GO:0008582	regulation of synaptic growth at neuromuscular junction	biological_process	2.0424e-10	4.2993e-09	55	3767	86	12231	FBgn0020440,FBgn0024234,FBgn0035060,FBgn0001122,FBgn0003371,FBgn0263111,FBgn0035533,FBgn0039213,FBgn0000017,FBgn0034646,FBgn0034265,FBgn0038980,FBgn0040208,FBgn0267698,FBgn0010379,FBgn0011817,FBgn0005198,FBgn0036257,FBgn0030600,FBgn0000578,FBgn0011571,FBgn0024277,FBgn0039632,FBgn0028734,FBgn0024179,FBgn0037884,FBgn0038747,FBgn0266053,FBgn0020493,FBgn0015269,FBgn0013762,FBgn0267002,FBgn0034135,FBg…
GO:1904396	regulation of neuromuscular junction development	biological_process	2.0424e-10	4.2993e-09	55	3767	86	12231	FBgn0050021,FBgn0034789,FBgn0259483,FBgn0010415,FBgn0262733,FBgn0261788,FBgn0002526,FBgn0053094,FBgn0003165,FBgn0001624,FBgn0259108,FBgn0032956,FBgn0264959,FBgn0038063,FBgn0000635,FBgn0010341,FBgn0267350,FBgn0010300,FBgn0029840,FBgn0264607,FBgn0003317,FBgn0034135,FBgn0011648,FBgn0267002,FBgn0015269,FBgn0013762,FBgn0038747,FBgn0020493,FBgn0266053,FBgn0024179,FBgn0028734,FBgn0024277,FBgn0039632,FBg…
GO:0010033	response to organic substance	biological_process	2.085e-10	4.3794e-09	168	3767	365	12231	FBgn0266282,FBgn0001332,FBgn0039861,FBgn0010341,FBgn0261239,FBgn0036428,FBgn0032006,FBgn0017590,FBgn0085484,FBgn0000546,FBgn0001189,FBgn0261014,FBgn0040372,FBgn0029006,FBgn0000473,FBgn0020493,FBgn0012051,FBgn0032642,FBgn0031745,FBgn0033062,FBgn0004367,FBgn0035499,FBgn0037015,FBgn0250753,FBgn0001079,FBgn0036932,FBgn0001324,FBgn0010379,FBgn0030310,FBgn0262739,FBgn0010389,FBgn0015279,FBgn0086371,FBg…
GO:0016023	cytoplasmic membrane-bounded vesicle	cellular_component	2.1306e-10	4.4655e-09	76	3767	133	12231	FBgn0086677,FBgn0036919,FBgn0028968,FBgn0031450,FBgn0030230,FBgn0032782,FBgn0004009,FBgn0266758,FBgn0013342,FBgn0264560,FBgn0000319,FBgn0030089,FBgn0259824,FBgn0030613,FBgn0083967,FBgn0008635,FBgn0028969,FBgn0033339,FBgn0004868,FBgn0264855,FBgn0053653,FBgn0053547,FBgn0030816,FBgn0031424,FBgn0035290,FBgn0004179,FBgn0040475,FBgn0024833,FBgn0005586,FBgn0030600,FBgn0029709,FBgn0261722,FBgn0036141,FBg…
GO:0043632	modification-dependent macromolecule catabolic process	biological_process	2.2192e-10	4.6414e-09	124	3767	251	12231	FBgn0030863,FBgn0039667,FBgn0037236,FBgn0259685,FBgn0021814,FBgn0013717,FBgn0011661,FBgn0034231,FBgn0052085,FBgn0036994,FBgn0005632,FBgn0000351,FBgn0020257,FBgn0037760,FBgn0259174,FBgn0017418,FBgn0028686,FBgn0016038,FBgn0033260,FBgn0000404,FBgn0004066,FBgn0260794,FBgn0039875,FBgn0035953,FBgn0028687,FBgn0051721,FBgn0022027,FBgn0032956,FBgn0261268,FBgn0028691,FBgn0013756,FBgn0262699,FBgn0029512,FBg…
GO:0032504	multicellular organism reproduction	biological_process	2.4221e-10	5.0547e-09	440	3767	1131	12231	FBgn0020224,FBgn0263231,FBgn0011648,FBgn0000183,FBgn0067317,FBgn0036895,FBgn0011205,FBgn0026192,FBgn0031412,FBgn0011232,FBgn0041781,FBgn0032475,FBgn0263510,FBgn0000562,FBgn0000307,FBgn0004635,FBgn0004363,FBgn0027506,FBgn0000042,FBgn0261238,FBgn0023509,FBgn0001301,FBgn0003392,FBgn0031285,FBgn0029161,FBgn0004657,FBgn0003984,FBgn0265998,FBgn0038167,FBgn0030844,FBgn0029881,FBgn0023096,FBgn0004373,FBg…
GO:0006913	nucleocytoplasmic transport	biological_process	2.4726e-10	5.1383e-09	68	3767	115	12231	FBgn0005411,FBgn0266580,FBgn0027868,FBgn0035110,FBgn0259152,FBgn0041582,FBgn0033737,FBgn0030136,FBgn0033260,FBgn0034939,FBgn0000250,FBgn0011692,FBgn0010441,FBgn0262743,FBgn0013756,FBgn0087013,FBgn0264493,FBgn0027338,FBgn0020255,FBgn0034310,FBgn0031390,FBgn0267727,FBgn0003371,FBgn0053180,FBgn0263396,FBgn0264922,FBgn0030122,FBgn0014366,FBgn0086358,FBgn0038722,FBgn0024889,FBgn0039120,FBgn0023423,FBg…
GO:0051169	nuclear transport	biological_process	2.4726e-10	5.1383e-09	68	3767	115	12231	FBgn0031078,FBgn0264785,FBgn0039302,FBgn0004864,FBgn0002044,FBgn0039110,FBgn0028426,FBgn0010379,FBgn0029830,FBgn0033379,FBgn0024509,FBgn0004644,FBgn0000017,FBgn0061200,FBgn0033264,FBgn0033380,FBgn0020497,FBgn0022213,FBgn0000352,FBgn0036640,FBgn0031456,FBgn0031145,FBgn0000253,FBgn0041585,FBgn0010660,FBgn0045073,FBgn0262866,FBgn0034282,FBgn0024921,FBgn0039120,FBgn0023423,FBgn0001079,FBgn0034645,FBg…
GO:0010389	regulation of G2/M transition of mitotic cell cycle	biological_process	2.6362e-10	5.455e-09	52	3767	80	12231	FBgn0002914,FBgn0040273,FBgn0039710,FBgn0004106,FBgn0027057,FBgn0015799,FBgn0033260,FBgn0020238,FBgn0040078,FBgn0002901,FBgn0045035,FBgn0037874,FBgn0085436,FBgn0023213,FBgn0028837,FBgn0027055,FBgn0004855,FBgn0040347,FBgn0037327,FBgn0261437,FBgn0033354,FBgn0020270,FBgn0037263,FBgn0015509,FBgn0003732,FBgn0036239,FBgn0004367,FBgn0027054,FBgn0004419,FBgn0003277,FBgn0002878,FBgn0000064,FBgn0262527,FBg…
GO:1902749	regulation of cell cycle G2/M phase transition	biological_process	2.6362e-10	5.455e-09	52	3767	80	12231	FBgn0028837,FBgn0027055,FBgn0004855,FBgn0040347,FBgn0037327,FBgn0023213,FBgn0015509,FBgn0036239,FBgn0003732,FBgn0004367,FBgn0033354,FBgn0261437,FBgn0020270,FBgn0037263,FBgn0033260,FBgn0020238,FBgn0040273,FBgn0039710,FBgn0002914,FBgn0004106,FBgn0027057,FBgn0015799,FBgn0037874,FBgn0085436,FBgn0040078,FBgn0002901,FBgn0045035,FBgn0027338,FBgn0015625,FBgn0020633,FBgn0038016,FBgn0040066,FBgn0033897,FBg…
GO:0031410	cytoplasmic vesicle	cellular_component	2.863e-10	5.9119e-09	83	3767	150	12231	FBgn0025724,FBgn0004649,FBgn0261722,FBgn0024187,FBgn0033075,FBgn0028500,FBgn0036141,FBgn0030341,FBgn0036819,FBgn0005586,FBgn0030600,FBgn0029709,FBgn0031424,FBgn0053653,FBgn0264855,FBgn0053547,FBgn0030816,FBgn0035290,FBgn0024833,FBgn0040475,FBgn0004179,FBgn0008635,FBgn0028969,FBgn0033339,FBgn0004868,FBgn0045823,FBgn0259824,FBgn0030613,FBgn0083967,FBgn0266758,FBgn0004009,FBgn0032782,FBgn0013342,FBg…
GO:0070887	cellular response to chemical stimulus	biological_process	2.8695e-10	5.9128e-09	128	3767	262	12231	FBgn0030600,FBgn0038438,FBgn0041100,FBgn0022942,FBgn0260749,FBgn0005198,FBgn0026722,FBgn0037436,FBgn0040475,FBgn0020251,FBgn0020386,FBgn0000490,FBgn0259785,FBgn0263930,FBgn0261984,FBgn0031950,FBgn0029067,FBgn0038874,FBgn0264075,FBgn0003720,FBgn0039875,FBgn0029504,FBgn0025800,FBgn0036994,FBgn0034240,FBgn0021872,FBgn0086712,FBgn0031016,FBgn0087035,FBgn0026317,FBgn0005614,FBgn0016917,FBgn0086371,FBg…
GO:0016482	cytoplasmic transport	biological_process	3.0281e-10	6.2264e-09	133	3767	275	12231	FBgn0260860,FBgn0262866,FBgn0045073,FBgn0010660,FBgn0265174,FBgn0031495,FBgn0031456,FBgn0262647,FBgn0261385,FBgn0033316,FBgn0033460,FBgn0026207,FBgn0029818,FBgn0034645,FBgn0032052,FBgn0001079,FBgn0039120,FBgn0038427,FBgn0035771,FBgn0010379,FBgn0028426,FBgn0052654,FBgn0039302,FBgn0020278,FBgn0264785,FBgn0262125,FBgn0036640,FBgn0000352,FBgn0260655,FBgn0033380,FBgn0041775,FBgn0035947,FBgn0061200,FBg…
GO:0044773	mitotic DNA damage checkpoint	biological_process	3.07e-10	6.2992e-09	50	3767	76	12231	FBgn0027338,FBgn0031885,FBgn0040066,FBgn0033897,FBgn0015546,FBgn0038016,FBgn0020633,FBgn0267351,FBgn0000541,FBgn0003612,FBgn0262527,FBgn0002878,FBgn0000064,FBgn0003277,FBgn0004419,FBgn0027054,FBgn0026143,FBgn0261278,FBgn0038578,FBgn0011785,FBgn0027053,FBgn0017550,FBgn0010173,FBgn0040347,FBgn0004855,FBgn0028837,FBgn0027055,FBgn0023213,FBgn0004367,FBgn0003732,FBgn0036239,FBgn0015509,FBgn0037263,FBg…
GO:0006511	ubiquitin-dependent protein catabolic process	biological_process	3.1207e-10	6.3899e-09	122	3767	247	12231	FBgn0037760,FBgn0259174,FBgn0028686,FBgn0017418,FBgn0016038,FBgn0000404,FBgn0033260,FBgn0004066,FBgn0260794,FBgn0039875,FBgn0035953,FBgn0028687,FBgn0051721,FBgn0032956,FBgn0022027,FBgn0261268,FBgn0028691,FBgn0013756,FBgn0039667,FBgn0030863,FBgn0037236,FBgn0259685,FBgn0013717,FBgn0021814,FBgn0011661,FBgn0034231,FBgn0036994,FBgn0052085,FBgn0005632,FBgn0000351,FBgn0020257,FBgn0061469,FBgn0033639,FBg…
GO:0010631	epithelial cell migration	biological_process	3.2257e-10	6.5774e-09	85	3767	155	12231	FBgn0003388,FBgn0035632,FBgn0003870,FBgn0262127,FBgn0262740,FBgn0004644,FBgn0264089,FBgn0015513,FBgn0259984,FBgn0011225,FBgn0086901,FBgn0016917,FBgn0004864,FBgn0027505,FBgn0010379,FBgn0264442,FBgn0038341,FBgn0085443,FBgn0265434,FBgn0000578,FBgn0000221,FBgn0000182,FBgn0243511,FBgn0026192,FBgn0001250,FBgn0023423,FBgn0020224,FBgn0003254,FBgn0000482,FBgn0032812,FBgn0000097,FBgn0010269,FBgn0032006,FBg…
GO:0090132	epithelium migration	biological_process	3.2257e-10	6.5774e-09	85	3767	155	12231	FBgn0267390,FBgn0260934,FBgn0031450,FBgn0266521,FBgn0010303,FBgn0039232,FBgn0003079,FBgn0001180,FBgn0053558,FBgn0003416,FBgn0022764,FBgn0031304,FBgn0043903,FBgn0015754,FBgn0266671,FBgn0000499,FBgn0011739,FBgn0034009,FBgn0032409,FBgn0263396,FBgn0036059,FBgn0020251,FBgn0000490,FBgn0003731,FBgn0003118,FBgn0041184,FBgn0005638,FBgn0027363,FBgn0000163,FBgn0032363,FBgn0003499,FBgn0001320,FBgn0041096,FBg…
GO:0051020	GTPase binding	molecular_function	3.5227e-10	7.1679e-09	48	3767	72	12231	FBgn0037894,FBgn0031456,FBgn0044823,FBgn0042177,FBgn0030230,FBgn0267795,FBgn0036333,FBgn0086757,FBgn0024921,FBgn0262743,FBgn0266572,FBgn0000183,FBgn0261064,FBgn0041582,FBgn0025802,FBgn0034585,FBgn0015278,FBgn0261532,FBgn0053139,FBgn0267378,FBgn0031745,FBgn0027287,FBgn0085443,FBgn0026056,FBgn0034708,FBgn0053547,FBgn0027335,FBgn0034697,FBgn0011202,FBgn0038504,FBgn0262114,FBgn0052654,FBgn0039302,FBg…
GO:0017016	Ras GTPase binding	molecular_function	3.9088e-10	7.937e-09	46	3767	68	12231	FBgn0266756,FBgn0035533,FBgn0020497,FBgn0022213,FBgn0026378,FBgn0053180,FBgn0262740,FBgn0259212,FBgn0038816,FBgn0026374,FBgn0028500,FBgn0264272,FBgn0033984,FBgn0039302,FBgn0038504,FBgn0052654,FBgn0262114,FBgn0026181,FBgn0034708,FBgn0053547,FBgn0085443,FBgn0027287,FBgn0026056,FBgn0011202,FBgn0034697,FBgn0027335,FBgn0261532,FBgn0053139,FBgn0034585,FBgn0015278,FBgn0031745,FBgn0267378,FBgn0000183,FBg…
GO:0000077	DNA damage checkpoint	biological_process	4.6913e-10	9.5062e-09	53	3767	83	12231	FBgn0020238,FBgn0033260,FBgn0260985,FBgn0015799,FBgn0029504,FBgn0027057,FBgn0004106,FBgn0040273,FBgn0014340,FBgn0039710,FBgn0085436,FBgn0037874,FBgn0045035,FBgn0002901,FBgn0040078,FBgn0040347,FBgn0004855,FBgn0027055,FBgn0028837,FBgn0023213,FBgn0004367,FBgn0036239,FBgn0003732,FBgn0015509,FBgn0037263,FBgn0038827,FBgn0261437,FBgn0033354,FBgn0020270,FBgn0262527,FBgn0000064,FBgn0002878,FBgn0003277,FBg…
GO:0006396	RNA processing	biological_process	4.7175e-10	9.5395e-09	178	3767	395	12231	FBgn0000114,FBgn0030915,FBgn0039920,FBgn0015621,FBgn0051922,FBgn0261383,FBgn0038146,FBgn0261933,FBgn0261068,FBgn0015818,FBgn0032248,FBgn0266917,FBgn0262735,FBgn0033210,FBgn0010774,FBgn0000504,FBgn0011305,FBgn0267791,FBgn0050342,FBgn0036277,FBgn0028426,FBgn0262739,FBgn0036850,FBgn0033842,FBgn0028471,FBgn0038168,FBgn0004882,FBgn0015949,FBgn0030468,FBgn0030625,FBgn0027617,FBgn0021895,FBgn0039229,FBg…
GO:0016055	Wnt signaling pathway	biological_process	6.7931e-10	1.3708e-08	65	3767	110	12231	FBgn0004360,FBgn0038065,FBgn0000097,FBgn0016977,FBgn0023423,FBgn0020496,FBgn0067317,FBgn0001332,FBgn0016797,FBgn0261617,FBgn0264492,FBgn0015589,FBgn0260635,FBgn0015024,FBgn0029123,FBgn0033791,FBgn0031903,FBgn0004177,FBgn0001122,FBgn0038862,FBgn0001139,FBgn0000017,FBgn0261279,FBgn0039110,FBgn0043900,FBgn0086356,FBgn0001324,FBgn0011817,FBgn0026181,FBgn0016917,FBgn0003041,FBgn0250823,FBgn0022764,FBg…
GO:0003682	chromatin binding	molecular_function	6.889e-10	1.3873e-08	78	3767	140	12231	FBgn0262519,FBgn0261573,FBgn0026401,FBgn0017577,FBgn0261793,FBgn0027951,FBgn0035047,FBgn0023097,FBgn0259785,FBgn0250786,FBgn0030891,FBgn0020633,FBgn0003567,FBgn0013263,FBgn0265523,FBgn0037831,FBgn0261823,FBgn0026143,FBgn0032929,FBgn0031876,FBgn0034537,FBgn0003042,FBgn0025815,FBgn0001325,FBgn0025800,FBgn0002775,FBgn0033183,FBgn0002521,FBgn0004374,FBgn0028982,FBgn0013756,FBgn0011741,FBgn0040283,FBg…
GO:0010941	regulation of cell death	biological_process	7.7066e-10	1.5488e-08	95	3767	181	12231	FBgn0085397,FBgn0013726,FBgn0003256,FBgn0038570,FBgn0002121,FBgn0010379,FBgn0001324,FBgn0036237,FBgn0086657,FBgn0265434,FBgn0266717,FBgn0263864,FBgn0000352,FBgn0262081,FBgn0040294,FBgn0040038,FBgn0052418,FBgn0262738,FBgn0001977,FBgn0002576,FBgn0002622,FBgn0028484,FBgn0038167,FBgn0259108,FBgn0032006,FBgn0261108,FBgn0000382,FBgn0260940,FBgn0041188,FBgn0003984,FBgn0001332,FBgn0033902,FBgn0261014,FBg…
GO:0044818	mitotic G2/M transition checkpoint	biological_process	7.9304e-10	1.5846e-08	47	3767	71	12231	FBgn0026143,FBgn0261278,FBgn0017550,FBgn0027053,FBgn0010173,FBgn0052251,FBgn0038578,FBgn0011785,FBgn0000064,FBgn0002878,FBgn0003277,FBgn0262527,FBgn0004419,FBgn0027054,FBgn0000541,FBgn0003612,FBgn0267351,FBgn0027338,FBgn0020633,FBgn0033897,FBgn0040066,FBgn0038016,FBgn0037874,FBgn0085436,FBgn0040078,FBgn0045035,FBgn0002901,FBgn0033260,FBgn0020238,FBgn0004106,FBgn0040273,FBgn0039710,FBgn0015799,FBg…
GO:0007173	epidermal growth factor receptor signaling pathway	biological_process	7.9334e-10	1.5846e-08	47	3767	71	12231	FBgn0010433,FBgn0003731,FBgn0020440,FBgn0041184,FBgn0003118,FBgn0027363,FBgn0023441,FBgn0020248,FBgn0039402,FBgn0086901,FBgn0010825,FBgn0015279,FBgn0014388,FBgn0264975,FBgn0000547,FBgn0003256,FBgn0000212,FBgn0035106,FBgn0029791,FBgn0015296,FBgn0004635,FBgn0015379,FBgn0003416,FBgn0031745,FBgn0004638,FBgn0003310,FBgn0002573,FBgn0016977,FBgn0020224,FBgn0260938,FBgn0015399,FBgn0021814,FBgn0263933,FBg…
GO:0038127	ERBB signaling pathway	biological_process	7.9334e-10	1.5846e-08	47	3767	71	12231	FBgn0042085,FBgn0033081,FBgn0031450,FBgn0003165,FBgn0003079,FBgn0261885,FBgn0029095,FBgn0263933,FBgn0022027,FBgn0010269,FBgn0000382,FBgn0264959,FBgn0000635,FBgn0260940,FBgn0003984,FBgn0016977,FBgn0002573,FBgn0015399,FBgn0260938,FBgn0020224,FBgn0021814,FBgn0015379,FBgn0004635,FBgn0003416,FBgn0031745,FBgn0003310,FBgn0004638,FBgn0015296,FBgn0029791,FBgn0000212,FBgn0035106,FBgn0015279,FBgn0086901,FBg…
GO:0016020	membrane	cellular_component	8.1829e-10	1.6311e-08	869	3767	2432	12231	FBgn0030089,FBgn0024189,FBgn0031106,FBgn0085425,FBgn0026313,FBgn0011589,FBgn0033052,FBgn0040370,FBgn0039674,FBgn0264753,FBgn0029849,FBgn0067783,FBgn0039916,FBgn0039636,FBgn0030870,FBgn0003996,FBgn0259174,FBgn0002938,FBgn0034956,FBgn0011286,FBgn0036934,FBgn0041247,FBgn0037671,FBgn0000257,FBgn0021814,FBgn0260003,FBgn0266580,FBgn0033739,FBgn0050389,FBgn0033391,FBgn0265082,FBgn0001259,FBgn0062413,FBg…
GO:0051170	nuclear import	biological_process	8.4582e-10	1.6825e-08	46	3767	69	12231	FBgn0087013,FBgn0024921,FBgn0013756,FBgn0262743,FBgn0262866,FBgn0045073,FBgn0010441,FBgn0011692,FBgn0010660,FBgn0041585,FBgn0000250,FBgn0000253,FBgn0031145,FBgn0031456,FBgn0033260,FBgn0262647,FBgn0261385,FBgn0033737,FBgn0041582,FBgn0026207,FBgn0034645,FBgn0027868,FBgn0266580,FBgn0001079,FBgn0039120,FBgn0023423,FBgn0029830,FBgn0010379,FBgn0024889,FBgn0086358,FBgn0004864,FBgn0014366,FBgn0039302,FBg…
GO:0022610	biological adhesion	biological_process	8.4831e-10	1.684e-08	118	3767	240	12231	FBgn0267435,FBgn0001122,FBgn0040294,FBgn0004177,FBgn0086899,FBgn0265296,FBgn0004397,FBgn0010434,FBgn0052666,FBgn0014857,FBgn0027562,FBgn0033901,FBgn0264089,FBgn0013987,FBgn0262742,FBgn0000547,FBgn0002577,FBgn0262114,FBgn0264975,FBgn0035101,FBgn0026562,FBgn0016696,FBgn0043900,FBgn0010348,FBgn0026181,FBgn0013997,FBgn0025879,FBgn0262125,FBgn0051004,FBgn0036715,FBgn0260004,FBgn0003041,FBgn0038439,FBg…
GO:0005057	receptor signaling protein activity	molecular_function	1.0296e-09	2.0398e-08	39	3767	55	12231	FBgn0266465,FBgn0261456,FBgn0033915,FBgn0267698,FBgn0010909,FBgn0026323,FBgn0085447,FBgn0030018,FBgn0011300,FBgn0044826,FBgn0024326,FBgn0024179,FBgn0011817,FBgn0261524,FBgn0025743,FBgn0003256,FBgn0024329,FBgn0010051,FBgn0020278,FBgn0040505,FBgn0011648,FBgn0000535,FBgn0024836,FBgn0031030,FBgn0003317,FBgn0045980,FBgn0020493,FBgn0002938,FBgn0025800,FBgn0003079,FBgn0085409,FBgn0010303,FBgn0003169,FBg…
GO:0003774	motor activity	molecular_function	1.1401e-09	2.2541e-08	51	3767	80	12231	FBgn0026141,FBgn0000352,FBgn0013811,FBgn0010235,FBgn0264695,FBgn0039925,FBgn0013810,FBgn0004387,FBgn0023096,FBgn0011225,FBgn0261397,FBgn0010246,FBgn0002772,FBgn0004381,FBgn0013813,FBgn0032243,FBgn0026059,FBgn0037726,FBgn0003545,FBgn0040299,FBgn0035256,FBgn0003149,FBgn0265434,FBgn0019968,FBgn0004380,FBgn0263076,FBgn0037254,FBgn0034566,FBgn0003654,FBgn0002938,FBgn0004379,FBgn0004378,FBgn0267431,FBg…
GO:0003676	nucleic acid binding	molecular_function	1.1484e-09	2.266e-08	588	3767	1582	12231	FBgn0034763,FBgn0038371,FBgn0033636,FBgn0004897,FBgn0004838,FBgn0259139,FBgn0027783,FBgn0266282,FBgn0261648,FBgn0261239,FBgn0027617,FBgn0035918,FBgn0042630,FBgn0002573,FBgn0001994,FBgn0016977,FBgn0028471,FBgn0030646,FBgn0003862,FBgn0028999,FBgn0015818,FBgn0027339,FBgn0053100,FBgn0262735,FBgn0037717,FBgn0031610,FBgn0038197,FBgn0017457,FBgn0020443,FBgn0032408,FBgn0010280,FBgn0003720,FBgn0037554,FBg…
GO:0045935	positive regulation of nucleobase-containing compound metabolic process	biological_process	1.1689e-09	2.3018e-08	145	3767	311	12231	FBgn0010280,FBgn0003720,FBgn0010356,FBgn0264075,FBgn0004837,FBgn0004009,FBgn0045759,FBgn0033052,FBgn0033749,FBgn0003430,FBgn0261963,FBgn0000099,FBgn0015371,FBgn0021872,FBgn0000577,FBgn0001180,FBgn0004795,FBgn0040071,FBgn0260749,FBgn0017430,FBgn0004396,FBgn0003507,FBgn0000137,FBgn0010750,FBgn0000251,FBgn0260632,FBgn0261573,FBgn0026401,FBgn0005638,FBgn0034722,FBgn0004102,FBgn0005561,FBgn0035993,FBg…
GO:0043169	cation binding	molecular_function	1.4598e-09	2.8687e-08	524	3767	1393	12231	FBgn0004197,FBgn0052369,FBgn0061200,FBgn0005630,FBgn0015621,FBgn0010575,FBgn0039559,FBgn0026160,FBgn0039920,FBgn0262125,FBgn0035189,FBgn0264785,FBgn0023511,FBgn0039302,FBgn0264975,FBgn0265356,FBgn0003044,FBgn0030310,FBgn0029822,FBgn0023171,FBgn0004607,FBgn0039347,FBgn0037655,FBgn0010422,FBgn0037751,FBgn0032812,FBgn0039069,FBgn0260970,FBgn0031495,FBgn0003028,FBgn0033917,FBgn0036702,FBgn0032196,FBg…
GO:0051130	positive regulation of cellular component organization	biological_process	1.477e-09	2.891e-08	89	3767	168	12231	FBgn0026192,FBgn0003475,FBgn0041781,FBgn0003520,FBgn0250753,FBgn0086372,FBgn0000283,FBgn0243511,FBgn0011648,FBgn0034012,FBgn0000183,FBgn0029688,FBgn0086359,FBgn0038369,FBgn0263933,FBgn0001624,FBgn0010314,FBgn0038063,FBgn0027948,FBgn0010341,FBgn0261788,FBgn0015589,FBgn0026479,FBgn0053094,FBgn0032859,FBgn0040372,FBgn0029870,FBgn0010415,FBgn0265512,FBgn0004242,FBgn0035533,FBgn0261276,FBgn0263667,FBg…
GO:0010972	negative regulation of G2/M transition of mitotic cell cycle	biological_process	1.48e-09	2.891e-08	48	3767	74	12231	FBgn0003612,FBgn0000541,FBgn0267351,FBgn0020633,FBgn0038016,FBgn0040066,FBgn0033897,FBgn0027338,FBgn0010173,FBgn0052251,FBgn0017550,FBgn0027053,FBgn0011785,FBgn0261850,FBgn0038578,FBgn0261278,FBgn0026143,FBgn0004419,FBgn0027054,FBgn0003277,FBgn0000064,FBgn0002878,FBgn0262527,FBgn0033354,FBgn0261437,FBgn0020270,FBgn0037263,FBgn0015509,FBgn0036239,FBgn0003732,FBgn0004367,FBgn0023213,FBgn0028837,FBg…
GO:1902750	negative regulation of cell cycle G2/M phase transition	biological_process	1.48e-09	2.891e-08	48	3767	74	12231	FBgn0261437,FBgn0033354,FBgn0020270,FBgn0037263,FBgn0015509,FBgn0004367,FBgn0003732,FBgn0036239,FBgn0023213,FBgn0004855,FBgn0027055,FBgn0028837,FBgn0040347,FBgn0040078,FBgn0045035,FBgn0002901,FBgn0037874,FBgn0085436,FBgn0004106,FBgn0040273,FBgn0039710,FBgn0015799,FBgn0027057,FBgn0033260,FBgn0020238,FBgn0000541,FBgn0003612,FBgn0267351,FBgn0020633,FBgn0040066,FBgn0033897,FBgn0038016,FBgn0027338,FBg…
GO:0044711	single-organism biosynthetic process	biological_process	1.5615e-09	3.0441e-08	220	3767	515	12231	FBgn0030304,FBgn0027580,FBgn0036300,FBgn0035328,FBgn0037008,FBgn0027558,FBgn0003023,FBgn0262112,FBgn0051522,FBgn0266438,FBgn0263131,FBgn0086695,FBgn0035918,FBgn0002891,FBgn0032052,FBgn0031681,FBgn0025885,FBgn0029818,FBgn0036128,FBgn0002921,FBgn0031912,FBgn0027493,FBgn0002567,FBgn0031422,FBgn0035436,FBgn0263979,FBgn0265174,FBgn0085484,FBgn0015799,FBgn0011763,FBgn0041171,FBgn0053116,FBgn0010350,FBg…
GO:0002376	immune system process	biological_process	1.5935e-09	3.1003e-08	169	3767	376	12231	FBgn0003261,FBgn0031975,FBgn0259704,FBgn0243511,FBgn0036980,FBgn0263995,FBgn0026207,FBgn0021895,FBgn0025574,FBgn0000097,FBgn0029114,FBgn0002440,FBgn0028541,FBgn0034068,FBgn0004606,FBgn0004507,FBgn0039634,FBgn0039532,FBgn0032006,FBgn0010341,FBgn0266557,FBgn0033483,FBgn0261617,FBgn0000546,FBgn0025936,FBgn0260935,FBgn0262473,FBgn0086899,FBgn0263864,FBgn0038197,FBgn0005630,FBgn0031973,FBgn0003447,FBg…
GO:0097458	neuron part	cellular_component	1.6748e-09	3.2521e-08	138	3767	294	12231	FBgn0026439,FBgn0086677,FBgn0030230,FBgn0015793,FBgn0002526,FBgn0032782,FBgn0260934,FBgn0000635,FBgn0266758,FBgn0265597,FBgn0030089,FBgn0013342,FBgn0260386,FBgn0259824,FBgn0005614,FBgn0028963,FBgn0004868,FBgn0030816,FBgn0264855,FBgn0031424,FBgn0024326,FBgn0019947,FBgn0024833,FBgn0026399,FBgn0036078,FBgn0259246,FBgn0262699,FBgn0261722,FBgn0036819,FBgn0036376,FBgn0036141,FBgn0052704,FBgn0033466,FBg…
GO:0007095	mitotic G2 DNA damage checkpoint	biological_process	1.7246e-09	3.3356e-08	46	3767	70	12231	FBgn0267351,FBgn0003612,FBgn0000541,FBgn0027338,FBgn0038016,FBgn0040066,FBgn0033897,FBgn0020633,FBgn0026143,FBgn0261278,FBgn0011785,FBgn0038578,FBgn0010173,FBgn0017550,FBgn0027053,FBgn0262527,FBgn0003277,FBgn0000064,FBgn0002878,FBgn0027054,FBgn0004419,FBgn0036239,FBgn0003732,FBgn0004367,FBgn0015509,FBgn0037263,FBgn0261437,FBgn0033354,FBgn0020270,FBgn0040347,FBgn0028837,FBgn0027055,FBgn0004855,FBg…
GO:0031572	G2 DNA damage checkpoint	biological_process	1.7246e-09	3.3356e-08	46	3767	70	12231	FBgn0027338,FBgn0020633,FBgn0038016,FBgn0033897,FBgn0040066,FBgn0003612,FBgn0000541,FBgn0267351,FBgn0003277,FBgn0002878,FBgn0000064,FBgn0262527,FBgn0027054,FBgn0004419,FBgn0026143,FBgn0261278,FBgn0010173,FBgn0027053,FBgn0017550,FBgn0011785,FBgn0038578,FBgn0028837,FBgn0027055,FBgn0004855,FBgn0040347,FBgn0023213,FBgn0015509,FBgn0003732,FBgn0036239,FBgn0004367,FBgn0261437,FBgn0033354,FBgn0020270,FBg…
GO:0046872	metal ion binding	molecular_function	1.7975e-09	3.4695e-08	516	3767	1371	12231	FBgn0029939,FBgn0034585,FBgn0053526,FBgn0039911,FBgn0035134,FBgn0003231,FBgn0002641,FBgn0032643,FBgn0000108,FBgn0033349,FBgn0020224,FBgn0029503,FBgn0031692,FBgn0035903,FBgn0000253,FBgn0034488,FBgn0027620,FBgn0034729,FBgn0013469,FBgn0003388,FBgn0031115,FBgn0004242,FBgn0035060,FBgn0262738,FBgn0034878,FBgn0015381,FBgn0019948,FBgn0037989,FBgn0030973,FBgn0038439,FBgn0034660,FBgn0001325,FBgn0035600,FBg…
GO:0030111	regulation of Wnt signaling pathway	biological_process	1.8523e-09	3.5552e-08	45	3767	68	12231	FBgn0001324,FBgn0005198,FBgn0011817,FBgn0086356,FBgn0261279,FBgn0043900,FBgn0039110,FBgn0029709,FBgn0026181,FBgn0016917,FBgn0003041,FBgn0020251,FBgn0001075,FBgn0003371,FBgn0000163,FBgn0003415,FBgn0026597,FBgn0038862,FBgn0039907,FBgn0001139,FBgn0036141,FBgn0034265,FBgn0001332,FBgn0039282,FBgn0260934,FBgn0025638,FBgn0020309,FBgn0037734,FBgn0011692,FBgn0264492,FBgn0027548,FBgn0015589,FBgn0015024,FBg…
GO:0006606	protein import into nucleus	biological_process	1.8564e-09	3.5552e-08	45	3767	68	12231	FBgn0033737,FBgn0261385,FBgn0262647,FBgn0023423,FBgn0039120,FBgn0001079,FBgn0266580,FBgn0027868,FBgn0026207,FBgn0041582,FBgn0045073,FBgn0262866,FBgn0262743,FBgn0024921,FBgn0013756,FBgn0087013,FBgn0033260,FBgn0031456,FBgn0031145,FBgn0000250,FBgn0000253,FBgn0041585,FBgn0010660,FBgn0011692,FBgn0010441,FBgn0034310,FBgn0022213,FBgn0000352,FBgn0267727,FBgn0003371,FBgn0024509,FBgn0264493,FBgn0004644,FBg…
GO:0044744	protein targeting to nucleus	biological_process	1.8564e-09	3.5552e-08	45	3767	68	12231	FBgn0004644,FBgn0027338,FBgn0264493,FBgn0024509,FBgn0061200,FBgn0033264,FBgn0034310,FBgn0022213,FBgn0000352,FBgn0003371,FBgn0267727,FBgn0264922,FBgn0031078,FBgn0014366,FBgn0039302,FBgn0004864,FBgn0086358,FBgn0024889,FBgn0029830,FBgn0010379,FBgn0001079,FBgn0266580,FBgn0039120,FBgn0023423,FBgn0027868,FBgn0026207,FBgn0041582,FBgn0033737,FBgn0261385,FBgn0262647,FBgn0033260,FBgn0031456,FBgn0000253,FBg…
GO:1902593	single-organism nuclear import	biological_process	1.8564e-09	3.5552e-08	45	3767	68	12231	FBgn0024921,FBgn0013756,FBgn0262743,FBgn0087013,FBgn0045073,FBgn0262866,FBgn0041585,FBgn0011692,FBgn0010441,FBgn0010660,FBgn0033260,FBgn0031456,FBgn0000250,FBgn0000253,FBgn0031145,FBgn0262647,FBgn0033737,FBgn0261385,FBgn0026207,FBgn0041582,FBgn0001079,FBgn0266580,FBgn0039120,FBgn0023423,FBgn0027868,FBgn0024889,FBgn0029830,FBgn0010379,FBgn0014366,FBgn0039302,FBgn0086358,FBgn0004864,FBgn0031078,FBg…
GO:0001709	cell fate determination	biological_process	1.9174e-09	3.6648e-08	80	3767	147	12231	FBgn0010300,FBgn0264075,FBgn0004837,FBgn0260934,FBgn0004878,FBgn0003165,FBgn0011692,FBgn0261963,FBgn0002973,FBgn0020238,FBgn0000606,FBgn0003053,FBgn0001325,FBgn0040080,FBgn0034803,FBgn0000577,FBgn0001180,FBgn0001108,FBgn0003944,FBgn0013718,FBgn0011723,FBgn0003651,FBgn0261854,FBgn0003483,FBgn0261823,FBgn0015754,FBgn0003507,FBgn0043903,FBgn0001169,FBgn0000137,FBgn0086680,FBgn0259791,FBgn0000490,FBg…
GO:0035091	phosphatidylinositol binding	molecular_function	2.0928e-09	3.9923e-08	34	3767	46	12231	FBgn0033244,FBgn0033075,FBgn0004387,FBgn0262468,FBgn0034265,FBgn0266669,FBgn0000163,FBgn0033996,FBgn0027569,FBgn0011202,FBgn0003041,FBgn0040475,FBgn0035850,FBgn0010379,FBgn0052758,FBgn0029976,FBgn0011661,FBgn0027574,FBgn0031534,FBgn0015278,FBgn0086372,FBgn0267378,FBgn0037648,FBgn0038065,FBgn0002938,FBgn0032005,FBgn0050372,FBgn0036372,FBgn0037280,FBgn0025381,FBgn0002932,FBgn0003218,FBgn0266667,FBg…
GO:0010562	positive regulation of phosphorus metabolic process	biological_process	2.3245e-09	4.4169e-08	60	3767	101	12231	FBgn0010303,FBgn0262733,FBgn0039566,FBgn0020510,FBgn0003079,FBgn0011573,FBgn0259483,FBgn0086677,FBgn0020238,FBgn0024811,FBgn0014006,FBgn0029840,FBgn0010269,FBgn0032006,FBgn0037874,FBgn0038063,FBgn0261108,FBgn0036934,FBgn0001123,FBgn0003360,FBgn0030613,FBgn0259685,FBgn0036932,FBgn0037573,FBgn0021796,FBgn0004638,FBgn0021818,FBgn0015269,FBgn0030018,FBgn0011300,FBgn0259791,FBgn0023178,FBgn0040011,FBg…
GO:0045937	positive regulation of phosphate metabolic process	biological_process	2.3245e-09	4.4169e-08	60	3767	101	12231	FBgn0010433,FBgn0015402,FBgn0037255,FBgn0010909,FBgn0026323,FBgn0250910,FBgn0261119,FBgn0264493,FBgn0035437,FBgn0044323,FBgn0263782,FBgn0031885,FBgn0086346,FBgn0032388,FBgn0038980,FBgn0038504,FBgn0040505,FBgn0024329,FBgn0261524,FBgn0005198,FBgn0031633,FBgn0003256,FBgn0025743,FBgn0264922,FBgn0016081,FBgn0037093,FBgn0024326,FBgn0259791,FBgn0023178,FBgn0040011,FBgn0011300,FBgn0030018,FBgn0015269,FBg…
GO:1902850	microtubule cytoskeleton organization involved in mitosis	biological_process	2.3526e-09	4.4616e-08	37	3767	52	12231	FBgn0032105,FBgn0030268,FBgn0011606,FBgn0035370,FBgn0040078,FBgn0002924,FBgn0030500,FBgn0264694,FBgn0024227,FBgn0023509,FBgn0259483,FBgn0000253,FBgn0002914,FBgn0035676,FBgn0015019,FBgn0264291,FBgn0040232,FBgn0011692,FBgn0027500,FBgn0001108,FBgn0260639,FBgn0267378,FBgn0004379,FBgn0021760,FBgn0037632,FBgn0032444,FBgn0035640,FBgn0010621,FBgn0086356,FBgn0260991,FBgn0015282,FBgn0260987,FBgn0039335,FBg…
GO:0030054	cell junction	cellular_component	2.3718e-09	4.4895e-08	76	3767	138	12231	FBgn0000547,FBgn0035085,FBgn0264975,FBgn0035101,FBgn0002121,FBgn0003256,FBgn0013997,FBgn0035539,FBgn0051004,FBgn0005536,FBgn0000578,FBgn0034540,FBgn0004397,FBgn0261873,FBgn0010434,FBgn0000017,FBgn0032731,FBgn0001624,FBgn0002921,FBgn0034577,FBgn0004657,FBgn0010415,FBgn0050372,FBgn0004167,FBgn0039911,FBgn0021818,FBgn0030530,FBgn0026192,FBgn0033984,FBgn0266671,FBgn0000723,FBgn0000008,FBgn0032230,FBg…
GO:0016569	covalent chromatin modification	biological_process	2.5899e-09	4.8833e-08	63	3767	108	12231	FBgn0032030,FBgn0037703,FBgn0011474,FBgn0037659,FBgn0036039,FBgn0034722,FBgn0030121,FBgn0086899,FBgn0261573,FBgn0000239,FBgn0032321,FBgn0027889,FBgn0031885,FBgn0037376,FBgn0052350,FBgn0040066,FBgn0025825,FBgn0023518,FBgn0013269,FBgn0260936,FBgn0263667,FBgn0086908,FBgn0030891,FBgn0260749,FBgn0037770,FBgn0036964,FBgn0003330,FBgn0261823,FBgn0034537,FBgn0025639,FBgn0086694,FBgn0000212,FBgn0260991,FBg…
GO:0016570	histone modification	biological_process	2.5899e-09	4.8833e-08	63	3767	108	12231	FBgn0000629,FBgn0039067,FBgn0052133,FBgn0013717,FBgn0003862,FBgn0267398,FBgn0036973,FBgn0040372,FBgn0263979,FBgn0039280,FBgn0014340,FBgn0027378,FBgn0020887,FBgn0039904,FBgn0262166,FBgn0037874,FBgn0027490,FBgn0263933,FBgn0261617,FBgn0032105,FBgn0028926,FBgn0026428,FBgn0045035,FBgn0024227,FBgn0023216,FBgn0000239,FBgn0032321,FBgn0031885,FBgn0027889,FBgn0260936,FBgn0013269,FBgn0263667,FBgn0086908,FBg…
GO:0042692	muscle cell differentiation	biological_process	2.9875e-09	5.6222e-08	62	3767	106	12231	FBgn0021796,FBgn0000606,FBgn0035917,FBgn0041781,FBgn0034803,FBgn0001250,FBgn0000047,FBgn0003944,FBgn0000014,FBgn0000667,FBgn0011771,FBgn0002773,FBgn0000097,FBgn0004028,FBgn0015806,FBgn0000709,FBgn0036641,FBgn0005666,FBgn0040068,FBgn0033988,FBgn0001308,FBgn0261560,FBgn0250906,FBgn0024189,FBgn0053519,FBgn0259228,FBgn0038294,FBgn0003292,FBgn0002973,FBgn0024811,FBgn0086677,FBgn0001258,FBgn0003731,FBg…
GO:0008017	microtubule binding	molecular_function	3.058e-09	5.7438e-08	58	3767	97	12231	FBgn0034957,FBgn0263076,FBgn0260991,FBgn0033845,FBgn0036059,FBgn0261387,FBgn0014133,FBgn0019968,FBgn0004380,FBgn0004381,FBgn0032243,FBgn0003545,FBgn0013726,FBgn0040208,FBgn0040207,FBgn0039925,FBgn0004387,FBgn0011225,FBgn0000352,FBgn0266579,FBgn0035638,FBgn0020503,FBgn0036480,FBgn0259099,FBgn0027066,FBgn0003392,FBgn0015589,FBgn0266521,FBgn0011692,FBgn0267432,FBgn0040232,FBgn0259108,FBgn0027948,FBg…
GO:0051093	negative regulation of developmental process	biological_process	3.1736e-09	5.9495e-08	82	3767	153	12231	FBgn0038197,FBgn0035533,FBgn0262127,FBgn0004177,FBgn0001122,FBgn0000320,FBgn0038980,FBgn0000017,FBgn0262738,FBgn0014388,FBgn0000547,FBgn0000504,FBgn0010379,FBgn0002121,FBgn0004870,FBgn0028387,FBgn0034975,FBgn0003124,FBgn0000578,FBgn0266717,FBgn0267002,FBgn0015269,FBgn0020493,FBgn0266053,FBgn0012051,FBgn0031005,FBgn0020279,FBgn0002783,FBgn0023423,FBgn0011648,FBgn0000097,FBgn0262866,FBgn0266450,FBg…
GO:0034504	protein localization to nucleus	biological_process	3.1996e-09	5.9866e-08	47	3767	73	12231	FBgn0262647,FBgn0261385,FBgn0033737,FBgn0041582,FBgn0026207,FBgn0027868,FBgn0266580,FBgn0001079,FBgn0039120,FBgn0023423,FBgn0087013,FBgn0023216,FBgn0024921,FBgn0013756,FBgn0262743,FBgn0001235,FBgn0262866,FBgn0045073,FBgn0011692,FBgn0010441,FBgn0010660,FBgn0041585,FBgn0000250,FBgn0000253,FBgn0031145,FBgn0033260,FBgn0031456,FBgn0003371,FBgn0267727,FBgn0000352,FBgn0022213,FBgn0034310,FBgn0033264,FBg…
GO:0051254	positive regulation of RNA metabolic process	biological_process	3.3747e-09	6.3023e-08	137	3767	294	12231	FBgn0011715,FBgn0019650,FBgn0028926,FBgn0003687,FBgn0023076,FBgn0001222,FBgn0004170,FBgn0014340,FBgn0002914,FBgn0004618,FBgn0002783,FBgn0020279,FBgn0022740,FBgn0000014,FBgn0011648,FBgn0002985,FBgn0023091,FBgn0000448,FBgn0015919,FBgn0011604,FBgn0261647,FBgn0003870,FBgn0000320,FBgn0015829,FBgn0004644,FBgn0011289,FBgn0004656,FBgn0002576,FBgn0040305,FBgn0013756,FBgn0000273,FBgn0010303,FBgn0002552,FBg…
GO:0015631	tubulin binding	molecular_function	3.4604e-09	6.4499e-08	61	3767	104	12231	FBgn0013718,FBgn0259173,FBgn0031955,FBgn0004374,FBgn0021760,FBgn0029903,FBgn0026430,FBgn0004379,FBgn0001202,FBgn0003475,FBgn0263197,FBgn0260639,FBgn0261385,FBgn0267002,FBgn0000283,FBgn0004378,FBgn0004167,FBgn0003520,FBgn0011692,FBgn0040232,FBgn0267432,FBgn0015589,FBgn0266521,FBgn0027066,FBgn0003392,FBgn0036480,FBgn0259099,FBgn0026620,FBgn0264694,FBgn0002924,FBgn0029688,FBgn0001308,FBgn0034282,FBg…
GO:0005694	chromosome	cellular_component	3.5415e-09	6.5886e-08	221	3767	522	12231	FBgn0261793,FBgn0004858,FBgn0000996,FBgn0259789,FBgn0023097,FBgn0023518,FBgn0030891,FBgn0003567,FBgn0053875,FBgn0004401,FBgn0039066,FBgn0013799,FBgn0037831,FBgn0036398,FBgn0001086,FBgn0004913,FBgn0005596,FBgn0015754,FBgn0262714,FBgn0024183,FBgn0011571,FBgn0022893,FBgn0026373,FBgn0038546,FBgn0000139,FBgn0025455,FBgn0264922,FBgn0030877,FBgn0262527,FBgn0025639,FBgn0031377,FBgn0011764,FBgn0022764,FBg…
GO:0045893	positive regulation of transcription, DNA-templated	biological_process	3.6065e-09	6.6632e-08	135	3767	289	12231	FBgn0025463,FBgn0014018,FBgn0028387,FBgn0023489,FBgn0028789,FBgn0000567,FBgn0000504,FBgn0038578,FBgn0043900,FBgn0036964,FBgn0039227,FBgn0265193,FBgn0030082,FBgn0033486,FBgn0026160,FBgn0014343,FBgn0061200,FBgn0005630,FBgn0038197,FBgn0002183,FBgn0003460,FBgn0000352,FBgn0029123,FBgn0042085,FBgn0264492,FBgn0003028,FBgn0040318,FBgn0000546,FBgn0040273,FBgn0033636,FBgn0261617,FBgn0001235,FBgn0025682,FBg…
GO:1902680	positive regulation of RNA biosynthetic process	biological_process	3.6065e-09	6.6632e-08	135	3767	289	12231	FBgn0030891,FBgn0023518,FBgn0039066,FBgn0030093,FBgn0004859,FBgn0003567,FBgn0261793,FBgn0003118,FBgn0259789,FBgn0010433,FBgn0000139,FBgn0086680,FBgn0000212,FBgn0022724,FBgn0019972,FBgn0262527,FBgn0011766,FBgn0013799,FBgn0011723,FBgn0002775,FBgn0028982,FBgn0000370,FBgn0000606,FBgn0037792,FBgn0010303,FBgn0039904,FBgn0261885,FBgn0002552,FBgn0000273,FBgn0013756,FBgn0040305,FBgn0011289,FBgn0002576,FBg…
GO:1903508	positive regulation of nucleic acid-templated transcription	biological_process	3.6065e-09	6.6632e-08	135	3767	289	12231	FBgn0000137,FBgn0010750,FBgn0000251,FBgn0260749,FBgn0003507,FBgn0017430,FBgn0004396,FBgn0005561,FBgn0004102,FBgn0035993,FBgn0038016,FBgn0033897,FBgn0013263,FBgn0029512,FBgn0261573,FBgn0260632,FBgn0026401,FBgn0005638,FBgn0034722,FBgn0033749,FBgn0003430,FBgn0261963,FBgn0003720,FBgn0010280,FBgn0010356,FBgn0264075,FBgn0004837,FBgn0045759,FBgn0004009,FBgn0033052,FBgn0040071,FBgn0000099,FBgn0015371,FBg…
GO:0032880	regulation of protein localization	biological_process	3.6089e-09	6.6632e-08	52	3767	84	12231	FBgn0024921,FBgn0039282,FBgn0051992,FBgn0262743,FBgn0045073,FBgn0262866,FBgn0041585,FBgn0004106,FBgn0011692,FBgn0010660,FBgn0033260,FBgn0000250,FBgn0265174,FBgn0000253,FBgn0038065,FBgn0038747,FBgn0037015,FBgn0261385,FBgn0267002,FBgn0029818,FBgn0026207,FBgn0032052,FBgn0041582,FBgn0259685,FBgn0259824,FBgn0001079,FBgn0023423,FBgn0010379,FBgn0003557,FBgn0029709,FBgn0014366,FBgn0086358,FBgn0052654,FBg…
GO:0016458	gene silencing	biological_process	4.0831e-09	7.5245e-08	78	3767	144	12231	FBgn0020261,FBgn0262166,FBgn0261239,FBgn0039861,FBgn0041188,FBgn0263979,FBgn0010415,FBgn0028707,FBgn0042085,FBgn0036915,FBgn0039338,FBgn0000283,FBgn0003732,FBgn0033062,FBgn0032475,FBgn0263974,FBgn0003261,FBgn0000629,FBgn0263231,FBgn0016756,FBgn0039169,FBgn0034878,FBgn0027339,FBgn0036964,FBgn0026573,FBgn0039227,FBgn0262739,FBgn0028387,FBgn0001087,FBgn0004419,FBgn0003210,FBgn0022361,FBgn0039559,FBg…
GO:0031401	positive regulation of protein modification process	biological_process	4.3097e-09	7.927e-08	63	3767	109	12231	FBgn0037874,FBgn0263933,FBgn0010269,FBgn0032006,FBgn0261108,FBgn0014006,FBgn0029840,FBgn0011573,FBgn0031450,FBgn0020238,FBgn0024811,FBgn0259483,FBgn0260635,FBgn0086677,FBgn0262733,FBgn0020510,FBgn0039566,FBgn0010303,FBgn0003079,FBgn0004638,FBgn0021796,FBgn0000351,FBgn0021818,FBgn0037573,FBgn0036932,FBgn0001079,FBgn0030613,FBgn0036934,FBgn0040505,FBgn0024329,FBgn0038504,FBgn0003256,FBgn0001086,FBg…
GO:0031982	vesicle	cellular_component	4.3952e-09	8.0691e-08	98	3767	193	12231	FBgn0259824,FBgn0045823,FBgn0083967,FBgn0030613,FBgn0033339,FBgn0028969,FBgn0030391,FBgn0008635,FBgn0004868,FBgn0031450,FBgn0028968,FBgn0003996,FBgn0086677,FBgn0036919,FBgn0031882,FBgn0015793,FBgn0030230,FBgn0037116,FBgn0266758,FBgn0004009,FBgn0032782,FBgn0030089,FBgn0000319,FBgn0264560,FBgn0013342,FBgn0261722,FBgn0036819,FBgn0033075,FBgn0024187,FBgn0028500,FBgn0036141,FBgn0030341,FBgn0025724,FBg…
GO:0051276	chromosome organization	biological_process	4.4697e-09	8.1905e-08	222	3767	526	12231	FBgn0037831,FBgn0036398,FBgn0037770,FBgn0003483,FBgn0005596,FBgn0024183,FBgn0020306,FBgn0024329,FBgn0015754,FBgn0022893,FBgn0000139,FBgn0031876,FBgn0038546,FBgn0034537,FBgn0030877,FBgn0025639,FBgn0031540,FBgn0000212,FBgn0011764,FBgn0036039,FBgn0037659,FBgn0260399,FBgn0030121,FBgn0000541,FBgn0026370,FBgn0263102,FBgn0023097,FBgn0000996,FBgn0040066,FBgn0052350,FBgn0023518,FBgn0260936,FBgn0030891,FBg…
GO:0010608	posttranscriptional regulation of gene expression	biological_process	4.5763e-09	8.3701e-08	69	3767	123	12231	FBgn0034261,FBgn0000114,FBgn0031047,FBgn0015075,FBgn0027835,FBgn0000182,FBgn0033029,FBgn0004419,FBgn0040227,FBgn0262739,FBgn0011666,FBgn0053100,FBgn0028426,FBgn0015279,FBgn0041191,FBgn0087039,FBgn0263231,FBgn0004882,FBgn0026083,FBgn0003261,FBgn0263974,FBgn0038100,FBgn0003520,FBgn0250753,FBgn0033062,FBgn0036239,FBgn0016070,FBgn0262526,FBgn0004838,FBgn0259139,FBgn0010415,FBgn0039861,FBgn0041188,FBg…
GO:0044456	synapse part	cellular_component	4.809e-09	8.7794e-08	77	3767	142	12231	FBgn0265416,FBgn0020429,FBgn0039914,FBgn0005586,FBgn0259246,FBgn0024833,FBgn0004179,FBgn0031424,FBgn0264855,FBgn0053653,FBgn0053547,FBgn0030816,FBgn0032901,FBgn0263111,FBgn0020440,FBgn0036141,FBgn0036819,FBgn0036376,FBgn0261722,FBgn0267698,FBgn0264607,FBgn0013342,FBgn0030089,FBgn0000319,FBgn0266758,FBgn0046704,FBgn0260934,FBgn0032782,FBgn0000635,FBgn0003165,FBgn0002526,FBgn0030230,FBgn0086677,FBg…
GO:0006461	protein complex assembly	biological_process	4.9814e-09	9.0772e-08	147	3767	322	12231	FBgn0013263,FBgn0032154,FBgn0035113,FBgn0264695,FBgn0035960,FBgn0264272,FBgn0027509,FBgn0267727,FBgn0030054,FBgn0260991,FBgn0031781,FBgn0036059,FBgn0011202,FBgn0086134,FBgn0003887,FBgn0003545,FBgn0034636,FBgn0037632,FBgn0000257,FBgn0004378,FBgn0051961,FBgn0032195,FBgn0011692,FBgn0011737,FBgn0030089,FBgn0024227,FBgn0037777,FBgn0022344,FBgn0031437,FBgn0263864,FBgn0035533,FBgn0262593,FBgn0026431,FBg…
GO:0005643	nuclear pore	cellular_component	5.4789e-09	9.9651e-08	35	3767	49	12231	FBgn0024889,FBgn0038722,FBgn0030122,FBgn0035640,FBgn0039302,FBgn0034118,FBgn0032010,FBgn0031078,FBgn0005695,FBgn0267727,FBgn0053180,FBgn0020497,FBgn0039125,FBgn0034310,FBgn0033766,FBgn0033264,FBgn0034646,FBgn0061200,FBgn0024509,FBgn0027338,FBgn0087013,FBgn0262743,FBgn0024921,FBgn0013756,FBgn0033247,FBgn0010660,FBgn0039348,FBgn0262647,FBgn0033316,FBgn0033737,FBgn0038274,FBgn0026207,FBgn0027868,FBg…
GO:0007417	central nervous system development	biological_process	5.6295e-09	1.022e-07	114	3767	236	12231	FBgn0086680,FBgn0004179,FBgn0031500,FBgn0000137,FBgn0264922,FBgn0026722,FBgn0032409,FBgn0028734,FBgn0014024,FBgn0024277,FBgn0035713,FBgn0025743,FBgn0003969,FBgn0004652,FBgn0010051,FBgn0015754,FBgn0039286,FBgn0264598,FBgn0000259,FBgn0004102,FBgn0039668,FBgn0026179,FBgn0000449,FBgn0003499,FBgn0003731,FBgn0260632,FBgn0032515,FBgn0045063,FBgn0010433,FBgn0002526,FBgn0004878,FBgn0020510,FBgn0002973,FBg…
GO:0005681	spliceosomal complex	cellular_component	5.9297e-09	1.0745e-07	92	3767	179	12231	FBgn0261119,FBgn0004401,FBgn0039488,FBgn0037737,FBgn0013435,FBgn0265297,FBgn0027587,FBgn0026713,FBgn0263603,FBgn0263396,FBgn0011571,FBgn0019990,FBgn0024191,FBgn0004227,FBgn0003638,FBgn0031266,FBgn0014366,FBgn0265184,FBgn0022942,FBgn0031318,FBgn0029133,FBgn0015331,FBgn0035253,FBgn0005411,FBgn0050122,FBgn0035162,FBgn0024285,FBgn0033339,FBgn0031493,FBgn0261872,FBgn0031114,FBgn0005648,FBgn0017457,FBg…
GO:0043067	regulation of programmed cell death	biological_process	6.3532e-09	1.1491e-07	85	3767	162	12231	FBgn0035851,FBgn0004009,FBgn0086706,FBgn0022027,FBgn0045035,FBgn0261268,FBgn0000273,FBgn0003079,FBgn0042693,FBgn0031491,FBgn0037481,FBgn0030613,FBgn0051005,FBgn0043884,FBgn0032929,FBgn0011785,FBgn0260749,FBgn0029891,FBgn0011739,FBgn0011766,FBgn0019947,FBgn0262559,FBgn0019972,FBgn0020386,FBgn0003118,FBgn0004436,FBgn0003731,FBgn0261722,FBgn0264493,FBgn0051216,FBgn0267698,FBgn0025825,FBgn0261456,FBg…
GO:0010256	endomembrane system organization	biological_process	7.0198e-09	1.2673e-07	72	3767	131	12231	FBgn0033075,FBgn0000115,FBgn0036368,FBgn0052380,FBgn0030503,FBgn0267351,FBgn0261984,FBgn0034697,FBgn0024833,FBgn0011202,FBgn0011207,FBgn0011708,FBgn0027287,FBgn0032120,FBgn0025743,FBgn0266671,FBgn0031673,FBgn0000257,FBgn0037339,FBgn0035965,FBgn0033179,FBgn0000543,FBgn0004378,FBgn0020510,FBgn0052056,FBgn0036919,FBgn0029736,FBgn0017418,FBgn0030089,FBgn0261983,FBgn0000319,FBgn0264560,FBgn0028540,FBg…
GO:0051129	negative regulation of cellular component organization	biological_process	7.2464e-09	1.3058e-07	69	3767	124	12231	FBgn0000017,FBgn0038980,FBgn0004373,FBgn0262468,FBgn0015546,FBgn0030082,FBgn0061476,FBgn0026326,FBgn0001122,FBgn0011474,FBgn0035533,FBgn0000578,FBgn0250823,FBgn0044324,FBgn0033845,FBgn0003884,FBgn0039227,FBgn0036964,FBgn0010379,FBgn0035640,FBgn0038814,FBgn0021760,FBgn0020493,FBgn0266053,FBgn0003268,FBgn0015269,FBgn0267002,FBgn0262733,FBgn0042085,FBgn0259483,FBgn0034577,FBgn0266450,FBgn0029840,FBg…
GO:0006915	apoptotic process	biological_process	7.2605e-09	1.3059e-07	93	3767	182	12231	FBgn0261014,FBgn0260635,FBgn0004170,FBgn0033902,FBgn0264291,FBgn0015799,FBgn0034763,FBgn0011763,FBgn0000546,FBgn0014340,FBgn0259176,FBgn0039338,FBgn0261108,FBgn0033483,FBgn0000382,FBgn0002622,FBgn0038167,FBgn0028484,FBgn0259108,FBgn0032006,FBgn0003984,FBgn0260940,FBgn0002573,FBgn0030941,FBgn0023423,FBgn0000014,FBgn0243511,FBgn0015509,FBgn0010382,FBgn0086657,FBgn0036237,FBgn0266717,FBgn0085397,FBg…
GO:0065009	regulation of molecular function	biological_process	8.0729e-09	1.4494e-07	122	3767	258	12231	FBgn0016081,FBgn0044324,FBgn0003884,FBgn0086657,FBgn0036237,FBgn0041707,FBgn0023178,FBgn0261786,FBgn0010316,FBgn0035640,FBgn0040505,FBgn0027505,FBgn0002121,FBgn0265137,FBgn0004644,FBgn0061476,FBgn0000239,FBgn0040038,FBgn0030915,FBgn0031973,FBgn0032725,FBgn0038980,FBgn0003870,FBgn0028546,FBgn0038197,FBgn0263864,FBgn0010909,FBgn0037816,FBgn0026323,FBgn0250910,FBgn0026326,FBgn0000352,FBgn0260635,FBg…
GO:0070271	protein complex biogenesis	biological_process	8.1074e-09	1.4529e-07	147	3767	324	12231	FBgn0004378,FBgn0000257,FBgn0037632,FBgn0024227,FBgn0030089,FBgn0011737,FBgn0011692,FBgn0032195,FBgn0051961,FBgn0030054,FBgn0267727,FBgn0027509,FBgn0264272,FBgn0264695,FBgn0035960,FBgn0035113,FBgn0013263,FBgn0032154,FBgn0034636,FBgn0003545,FBgn0003887,FBgn0011202,FBgn0086134,FBgn0036059,FBgn0260991,FBgn0031781,FBgn0261618,FBgn0267378,FBgn0029117,FBgn0261437,FBgn0003475,FBgn0031455,FBgn0033460,FBg…
GO:0071705	nitrogen compound transport	biological_process	8.9308e-09	1.5976e-07	83	3767	158	12231	FBgn0003360,FBgn0087035,FBgn0031250,FBgn0005411,FBgn0024994,FBgn0035110,FBgn0033391,FBgn0027868,FBgn0002938,FBgn0030136,FBgn0001108,FBgn0260743,FBgn0035244,FBgn0029849,FBgn0038950,FBgn0038641,FBgn0003996,FBgn0026439,FBgn0034939,FBgn0029708,FBgn0000319,FBgn0034911,FBgn0000115,FBgn0036141,FBgn0030574,FBgn0002778,FBgn0026438,FBgn0010497,FBgn0034310,FBgn0031390,FBgn0262736,FBgn0263396,FBgn0027575,FBg…
GO:0000975	regulatory region DNA binding	molecular_function	9.5941e-09	1.71e-07	61	3767	106	12231	FBgn0003042,FBgn0262527,FBgn0000251,FBgn0000137,FBgn0086680,FBgn0014859,FBgn0029711,FBgn0027054,FBgn0028789,FBgn0004396,FBgn0003507,FBgn0011701,FBgn0005624,FBgn0011766,FBgn0260749,FBgn0036398,FBgn0000448,FBgn0264954,FBgn0038499,FBgn0004859,FBgn0013269,FBgn0005561,FBgn0002576,FBgn0035993,FBgn0259789,FBgn0001150,FBgn0003870,FBgn0261793,FBgn0260632,FBgn0005638,FBgn0261963,FBgn0004170,FBgn0000546,FBg…
GO:0001067	regulatory region nucleic acid binding	molecular_function	9.5941e-09	1.71e-07	61	3767	106	12231	FBgn0011701,FBgn0003507,FBgn0004396,FBgn0005624,FBgn0011766,FBgn0264954,FBgn0036398,FBgn0260749,FBgn0000448,FBgn0003042,FBgn0262527,FBgn0000251,FBgn0000137,FBgn0028789,FBgn0027054,FBgn0014859,FBgn0086680,FBgn0029711,FBgn0259789,FBgn0001150,FBgn0003870,FBgn0005638,FBgn0260632,FBgn0261793,FBgn0038499,FBgn0004859,FBgn0013269,FBgn0005561,FBgn0002576,FBgn0035993,FBgn0261239,FBgn0004837,FBgn0024371,FBg…
GO:0042327	positive regulation of phosphorylation	biological_process	1.0203e-08	1.815e-07	53	3767	88	12231	FBgn0036932,FBgn0037573,FBgn0259685,FBgn0036934,FBgn0030613,FBgn0021818,FBgn0004638,FBgn0021796,FBgn0086677,FBgn0259483,FBgn0024811,FBgn0020238,FBgn0011573,FBgn0003079,FBgn0010303,FBgn0262733,FBgn0039566,FBgn0020510,FBgn0261108,FBgn0032006,FBgn0010269,FBgn0037874,FBgn0029840,FBgn0014006,FBgn0044323,FBgn0035437,FBgn0264493,FBgn0261119,FBgn0031885,FBgn0263782,FBgn0086346,FBgn0032388,FBgn0015402,FBg…
GO:0005813	centrosome	cellular_component	1.022e-08	1.815e-07	53	3767	88	12231	FBgn0003371,FBgn0004177,FBgn0061200,FBgn0039731,FBgn0000147,FBgn0040208,FBgn0000063,FBgn0262699,FBgn0001086,FBgn0011020,FBgn0015754,FBgn0003950,FBgn0260439,FBgn0003124,FBgn0034451,FBgn0264848,FBgn0032876,FBgn0044324,FBgn0003884,FBgn0036059,FBgn0263197,FBgn0039936,FBgn0261004,FBgn0000351,FBgn0004378,FBgn0027500,FBgn0001108,FBgn0260639,FBgn0000283,FBgn0038965,FBgn0013718,FBgn0021760,FBgn0017581,FBg…
GO:1902494	catalytic complex	cellular_component	1.0656e-08	1.8889e-07	259	3767	635	12231	FBgn0034975,FBgn0262801,FBgn0031036,FBgn0013813,FBgn0024188,FBgn0031633,FBgn0032167,FBgn0261109,FBgn0000581,FBgn0026378,FBgn0026141,FBgn0004177,FBgn0261383,FBgn0020312,FBgn0264691,FBgn0260935,FBgn0039218,FBgn0024941,FBgn0032287,FBgn0002921,FBgn0261617,FBgn0005616,FBgn0000629,FBgn0085451,FBgn0033842,FBgn0052230,FBgn0029818,FBgn0039175,FBgn0243511,FBgn0015828,FBgn0003654,FBgn0003042,FBgn0030087,FBg…
GO:0007308	oocyte construction	biological_process	1.1326e-08	2.004e-07	69	3767	125	12231	FBgn0034921,FBgn0003483,FBgn0027053,FBgn0261524,FBgn0032340,FBgn0015754,FBgn0262467,FBgn0034072,FBgn0000490,FBgn0263396,FBgn0034451,FBgn0028734,FBgn0003495,FBgn0005695,FBgn0003731,FBgn0000163,FBgn0263929,FBgn0016034,FBgn0263102,FBgn0000711,FBgn0000259,FBgn0261458,FBgn0000615,FBgn0001233,FBgn0003089,FBgn0001308,FBgn0000319,FBgn0000273,FBgn0024371,FBgn0260934,FBgn0026238,FBgn0020238,FBgn0004510,FBg…
GO:0007266	Rho protein signal transduction	biological_process	1.1571e-08	2.0436e-07	31	3767	42	12231	FBgn0000384,FBgn0262562,FBgn0264707,FBgn0032821,FBgn0032796,FBgn0264598,FBgn0023172,FBgn0040068,FBgn0035574,FBgn0053519,FBgn0025740,FBgn0025836,FBgn0086356,FBgn0265082,FBgn0261556,FBgn0026181,FBgn0050440,FBgn0010341,FBgn0035761,FBgn0031118,FBgn0036257,FBgn0086901,FBgn0085447,FBgn0001965,FBgn0044823,FBgn0031216,FBgn0035802,FBgn0003041,FBgn0263706,FBgn0024277,FBgn0026375
GO:0001934	positive regulation of protein phosphorylation	biological_process	1.1595e-08	2.0441e-07	52	3767	86	12231	FBgn0030613,FBgn0036934,FBgn0036932,FBgn0037573,FBgn0004638,FBgn0021796,FBgn0021818,FBgn0039566,FBgn0262733,FBgn0020510,FBgn0010303,FBgn0003079,FBgn0011573,FBgn0020238,FBgn0024811,FBgn0259483,FBgn0086677,FBgn0014006,FBgn0029840,FBgn0037874,FBgn0032006,FBgn0010269,FBgn0261108,FBgn0032388,FBgn0086346,FBgn0031885,FBgn0263782,FBgn0261119,FBgn0264493,FBgn0035437,FBgn0044323,FBgn0026323,FBgn0010909,FBg…
GO:0007611	learning or memory	biological_process	1.1839e-08	2.0796e-07	79	3767	149	12231	FBgn0004009,FBgn0000635,FBgn0004837,FBgn0038934,FBgn0264607,FBgn0027106,FBgn0003502,FBgn0003513,FBgn0265597,FBgn0000273,FBgn0020238,FBgn0003996,FBgn0003165,FBgn0053513,FBgn0045823,FBgn0261854,FBgn0000721,FBgn0266580,FBgn0037705,FBgn0001123,FBgn0000535,FBgn0041111,FBgn0001208,FBgn0259246,FBgn0043903,FBgn0000119,FBgn0061469,FBgn0028734,FBgn0261934,FBgn0003371,FBgn0041184,FBgn0266579,FBgn0003731,FBg…
GO:0050890	cognition	biological_process	1.1839e-08	2.0796e-07	79	3767	149	12231	FBgn0036697,FBgn0259243,FBgn0023479,FBgn0250823,FBgn0019948,FBgn0004419,FBgn0034046,FBgn0004864,FBgn0040505,FBgn0023023,FBgn0016917,FBgn0000479,FBgn0262739,FBgn0035770,FBgn0266572,FBgn0023423,FBgn0039747,FBgn0000108,FBgn0010399,FBgn0015269,FBgn0003520,FBgn0004635,FBgn0250753,FBgn0004638,FBgn0003392,FBgn0000422,FBgn0040372,FBgn0017590,FBgn0000546,FBgn0262733,FBgn0261788,FBgn0002932,FBgn0263987,FBg…
GO:0090307	mitotic spindle assembly	biological_process	1.2773e-08	2.2397e-07	35	3767	50	12231	FBgn0086356,FBgn0010621,FBgn0035640,FBgn0260439,FBgn0086134,FBgn0260987,FBgn0039335,FBgn0260991,FBgn0015282,FBgn0038585,FBgn0264694,FBgn0024227,FBgn0040078,FBgn0030500,FBgn0002924,FBgn0030268,FBgn0032105,FBgn0035370,FBgn0011606,FBgn0264291,FBgn0040232,FBgn0015019,FBgn0011692,FBgn0002914,FBgn0035676,FBgn0259483,FBgn0000253,FBgn0023509,FBgn0004379,FBgn0267378,FBgn0001108,FBgn0260639,FBgn0027500,FBg…
GO:0042592	homeostatic process	biological_process	1.3413e-08	2.3478e-07	127	3767	273	12231	FBgn0010482,FBgn0085387,FBgn0004028,FBgn0022355,FBgn0260003,FBgn0010470,FBgn0259685,FBgn0031478,FBgn0085444,FBgn0003360,FBgn0030329,FBgn0026317,FBgn0039254,FBgn0011286,FBgn0015622,FBgn0038074,FBgn0036844,FBgn0264006,FBgn0086712,FBgn0000121,FBgn0003053,FBgn0002938,FBgn0020270,FBgn0021953,FBgn0036449,FBgn0042693,FBgn0020653,FBgn0035244,FBgn0010303,FBgn0040305,FBgn0036579,FBgn0022027,FBgn0036745,FBg…
GO:0042059	negative regulation of epidermal growth factor receptor signaling pathway	biological_process	1.4009e-08	2.4433e-07	25	3767	31	12231	FBgn0260938,FBgn0020224,FBgn0015399,FBgn0039402,FBgn0021814,FBgn0002573,FBgn0041184,FBgn0020440,FBgn0004638,FBgn0027363,FBgn0003416,FBgn0003165,FBgn0031450,FBgn0042085,FBgn0033081,FBgn0029791,FBgn0035106,FBgn0260940,FBgn0015279,FBgn0022027,FBgn0010825,FBgn0000547,FBgn0264959,FBgn0014388,FBgn0000635
GO:1901185	negative regulation of ERBB signaling pathway	biological_process	1.4009e-08	2.4433e-07	25	3767	31	12231	FBgn0003416,FBgn0027363,FBgn0004638,FBgn0020440,FBgn0041184,FBgn0002573,FBgn0039402,FBgn0021814,FBgn0020224,FBgn0260938,FBgn0015399,FBgn0264959,FBgn0014388,FBgn0000635,FBgn0000547,FBgn0010825,FBgn0022027,FBgn0015279,FBgn0260940,FBgn0035106,FBgn0033081,FBgn0042085,FBgn0031450,FBgn0029791,FBgn0003165
GO:0044459	plasma membrane part	cellular_component	1.5428e-08	2.6859e-07	226	3767	544	12231	FBgn0040323,FBgn0261788,FBgn0053094,FBgn0004622,FBgn0010380,FBgn0016123,FBgn0039234,FBgn0004514,FBgn0000206,FBgn0031734,FBgn0004657,FBgn0034577,FBgn0003218,FBgn0040324,FBgn0038063,FBgn0010399,FBgn0032151,FBgn0034135,FBgn0004108,FBgn0004650,FBgn0003748,FBgn0003048,FBgn0037100,FBgn0052843,FBgn0026192,FBgn0039911,FBgn0001250,FBgn0031879,FBgn0000384,FBgn0004635,FBgn0261046,FBgn0015269,FBgn0034136,FBg…
GO:0051146	striated muscle cell differentiation	biological_process	1.5455e-08	2.6859e-07	54	3767	91	12231	FBgn0041096,FBgn0026179,FBgn0036044,FBgn0086442,FBgn0086368,FBgn0264695,FBgn0015513,FBgn0004169,FBgn0025391,FBgn0267385,FBgn0038197,FBgn0003118,FBgn0001091,FBgn0001258,FBgn0053208,FBgn0032409,FBgn0265991,FBgn0086906,FBgn0014863,FBgn0044826,FBgn0265434,FBgn0010583,FBgn0003149,FBgn0034072,FBgn0014388,FBgn0010379,FBgn0010389,FBgn0265356,FBgn0002789,FBgn0040068,FBgn0005666,FBgn0036641,FBgn0000709,FBg…
GO:0007309	oocyte axis specification	biological_process	1.5615e-08	2.7088e-07	67	3767	121	12231	FBgn0004510,FBgn0261064,FBgn0261854,FBgn0011661,FBgn0024371,FBgn0260934,FBgn0003089,FBgn0001308,FBgn0001233,FBgn0000273,FBgn0000319,FBgn0000615,FBgn0020238,FBgn0026238,FBgn0263102,FBgn0016034,FBgn0003731,FBgn0263929,FBgn0000163,FBgn0000711,FBgn0261458,FBgn0000259,FBgn0015754,FBgn0034072,FBgn0027053,FBgn0034921,FBgn0003483,FBgn0261524,FBgn0032340,FBgn0034451,FBgn0028734,FBgn0263396,FBgn0005695,FBg…
GO:0044212	transcription regulatory region DNA binding	molecular_function	1.8219e-08	3.1551e-07	60	3767	105	12231	FBgn0261963,FBgn0004170,FBgn0000546,FBgn0001168,FBgn0003430,FBgn0015799,FBgn0029504,FBgn0024371,FBgn0004837,FBgn0261239,FBgn0040305,FBgn0045759,FBgn0023076,FBgn0003687,FBgn0004606,FBgn0004607,FBgn0000370,FBgn0011648,FBgn0002521,FBgn0036892,FBgn0001180,FBgn0003862,FBgn0000577,FBgn0035499,FBgn0004795,FBgn0028685,FBgn0003944,FBgn0000606,FBgn0000099,FBgn0015240,FBgn0003042,FBgn0000251,FBgn0262527,FBg…
GO:0008285	negative regulation of cell proliferation	biological_process	1.8759e-08	3.2428e-07	42	3767	65	12231	FBgn0041171,FBgn0261885,FBgn0015799,FBgn0002441,FBgn0001233,FBgn0010300,FBgn0001624,FBgn0022027,FBgn0011715,FBgn0265998,FBgn0263289,FBgn0026317,FBgn0023423,FBgn0002783,FBgn0004889,FBgn0037481,FBgn0003124,FBgn0261647,FBgn0000490,FBgn0039632,FBgn0028992,FBgn0000212,FBgn0014018,FBgn0001075,FBgn0036740,FBgn0011739,FBgn0002121,FBgn0027053,FBgn0005198,FBgn0260749,FBgn0032499,FBgn0028397,FBgn0020306,FBg…
GO:0009994	oocyte differentiation	biological_process	2.2618e-08	3.903e-07	82	3767	158	12231	FBgn0016081,FBgn0015797,FBgn0003124,FBgn0031985,FBgn0010316,FBgn0086371,FBgn0262739,FBgn0002121,FBgn0026181,FBgn0261397,FBgn0000533,FBgn0002926,FBgn0259243,FBgn0026431,FBgn0041775,FBgn0003450,FBgn0000181,FBgn0004242,FBgn0040294,FBgn0261014,FBgn0259139,FBgn0004875,FBgn0004838,FBgn0264492,FBgn0262526,FBgn0027948,FBgn0038167,FBgn0034577,FBgn0041188,FBgn0029161,FBgn0267350,FBgn0260940,FBgn0039861,FBg…
GO:0016331	morphogenesis of embryonic epithelium	biological_process	2.4381e-08	4.1999e-07	67	3767	122	12231	FBgn0010238,FBgn0024234,FBgn0003731,FBgn0000163,FBgn0001311,FBgn0267698,FBgn0259212,FBgn0000449,FBgn0001321,FBgn0000723,FBgn0003507,FBgn0020392,FBgn0000499,FBgn0000299,FBgn0267488,FBgn0030018,FBgn0000490,FBgn0003053,FBgn0001325,FBgn0261854,FBgn0024555,FBgn0259685,FBgn0263289,FBgn0004009,FBgn0264959,FBgn0086357,FBgn0003502,FBgn0031882,FBgn0003169,FBgn0010303,FBgn0266756,FBgn0003388,FBgn0026323,FBg…
GO:0098687	chromosomal region	cellular_component	2.7027e-08	4.6474e-07	74	3767	139	12231	FBgn0021760,FBgn0004237,FBgn0000283,FBgn0003268,FBgn0003261,FBgn0043456,FBgn0040372,FBgn0264291,FBgn0040232,FBgn0262526,FBgn0014340,FBgn0040273,FBgn0020887,FBgn0039338,FBgn0025682,FBgn0030500,FBgn0061476,FBgn0030082,FBgn0039559,FBgn0034051,FBgn0027835,FBgn0010328,FBgn0026326,FBgn0260987,FBgn0031549,FBgn0044324,FBgn0037093,FBgn0003124,FBgn0039169,FBgn0010825,FBgn0004924,FBgn0035640,FBgn0039680,FBg…
GO:0051648	vesicle localization	biological_process	2.8526e-08	4.8966e-07	66	3767	120	12231	FBgn0263968,FBgn0004179,FBgn0020251,FBgn0024833,FBgn0264855,FBgn0053653,FBgn0011708,FBgn0053547,FBgn0027575,FBgn0086784,FBgn0027655,FBgn0266671,FBgn0000115,FBgn0030057,FBgn0038816,FBgn0261722,FBgn0027363,FBgn0040281,FBgn0028582,FBgn0030230,FBgn0031450,FBgn0013342,FBgn0031106,FBgn0026313,FBgn0010300,FBgn0000319,FBgn0266667,FBgn0030089,FBgn0046704,FBgn0266758,FBgn0037339,FBgn0003360,FBgn0259824,FBg…
GO:0042058	regulation of epidermal growth factor receptor signaling pathway	biological_process	2.9666e-08	5.0744e-07	32	3767	45	12231	FBgn0031745,FBgn0003310,FBgn0004638,FBgn0004635,FBgn0003416,FBgn0260938,FBgn0020224,FBgn0015399,FBgn0021814,FBgn0002573,FBgn0260940,FBgn0003984,FBgn0022027,FBgn0263933,FBgn0264959,FBgn0000635,FBgn0261885,FBgn0003165,FBgn0042085,FBgn0033081,FBgn0031450,FBgn0020440,FBgn0041184,FBgn0027363,FBgn0039402,FBgn0010825,FBgn0015279,FBgn0014388,FBgn0000547,FBgn0000212,FBgn0035106,FBgn0029791
GO:1901184	regulation of ERBB signaling pathway	biological_process	2.9666e-08	5.0744e-07	32	3767	45	12231	FBgn0264959,FBgn0000635,FBgn0022027,FBgn0263933,FBgn0003984,FBgn0260940,FBgn0042085,FBgn0033081,FBgn0031450,FBgn0261885,FBgn0003165,FBgn0003416,FBgn0004635,FBgn0004638,FBgn0031745,FBgn0003310,FBgn0002573,FBgn0021814,FBgn0015399,FBgn0260938,FBgn0020224,FBgn0014388,FBgn0000547,FBgn0010825,FBgn0015279,FBgn0000212,FBgn0035106,FBgn0029791,FBgn0027363,FBgn0020440,FBgn0041184,FBgn0039402
GO:0044089	positive regulation of cellular component biogenesis	biological_process	2.9918e-08	5.1086e-07	49	3767	81	12231	FBgn0011817,FBgn0265193,FBgn0026181,FBgn0041191,FBgn0036257,FBgn0264606,FBgn0011571,FBgn0085447,FBgn0044826,FBgn0011202,FBgn0000578,FBgn0003495,FBgn0250823,FBgn0025463,FBgn0037884,FBgn0024277,FBgn0031781,FBgn0024179,FBgn0263111,FBgn0024234,FBgn0035533,FBgn0031437,FBgn0264598,FBgn0034265,FBgn0261397,FBgn0267698,FBgn0038369,FBgn0027948,FBgn0010341,FBgn0035761,FBgn0038063,FBgn0001624,FBgn0053094,FBg…
GO:0005815	microtubule organizing center	cellular_component	3.2931e-08	5.6132e-07	56	3767	97	12231	FBgn0003950,FBgn0015754,FBgn0011020,FBgn0001086,FBgn0044324,FBgn0003884,FBgn0036059,FBgn0032876,FBgn0264848,FBgn0034451,FBgn0003124,FBgn0260439,FBgn0026431,FBgn0032030,FBgn0003371,FBgn0004177,FBgn0040207,FBgn0262699,FBgn0040208,FBgn0000063,FBgn0000147,FBgn0061200,FBgn0039731,FBgn0027948,FBgn0086757,FBgn0026620,FBgn0023177,FBgn0035295,FBgn0026371,FBgn0001233,FBgn0262719,FBgn0259483,FBgn0000253,FBg…
GO:0071495	cellular response to endogenous stimulus	biological_process	3.4031e-08	5.7906e-07	75	3767	142	12231	FBgn0261524,FBgn0005198,FBgn0263593,FBgn0039914,FBgn0262169,FBgn0030600,FBgn0015754,FBgn0000490,FBgn0014859,FBgn0020386,FBgn0020251,FBgn0264922,FBgn0031461,FBgn0037436,FBgn0033744,FBgn0027363,FBgn0024234,FBgn0263930,FBgn0035469,FBgn0034265,FBgn0029067,FBgn0038874,FBgn0264075,FBgn0003720,FBgn0000395,FBgn0003169,FBgn0031450,FBgn0035849,FBgn0025800,FBgn0003651,FBgn0026317,FBgn0031016,FBgn0038755,FBg…
GO:0080134	regulation of response to stress	biological_process	3.4259e-08	5.8193e-07	98	3767	201	12231	FBgn0035850,FBgn0082598,FBgn0016917,FBgn0010379,FBgn0264357,FBgn0038570,FBgn0030310,FBgn0010389,FBgn0003256,FBgn0026181,FBgn0034476,FBgn0033438,FBgn0014018,FBgn0266717,FBgn0016926,FBgn0020497,FBgn0028546,FBgn0037703,FBgn0038197,FBgn0037203,FBgn0026323,FBgn0044323,FBgn0031885,FBgn0027889,FBgn0031973,FBgn0086346,FBgn0013987,FBgn0013269,FBgn0010341,FBgn0039532,FBgn0038167,FBgn0034070,FBgn0001332,FBg…
GO:0005768	endosome	cellular_component	4.4321e-08	7.5153e-07	71	3767	133	12231	FBgn0262516,FBgn0260940,FBgn0002567,FBgn0000206,FBgn0016797,FBgn0039966,FBgn0262473,FBgn0030805,FBgn0039234,FBgn0032005,FBgn0025381,FBgn0002932,FBgn0034585,FBgn0031534,FBgn0262518,FBgn0038065,FBgn0001202,FBgn0036932,FBgn0034546,FBgn0028541,FBgn0025802,FBgn0000482,FBgn0015372,FBgn0014411,FBgn0053198,FBgn0261279,FBgn0052758,FBgn0038427,FBgn0024179,FBgn0034708,FBgn0001087,FBgn0039335,FBgn0036740,FBg…
GO:0005096	GTPase activator activity	molecular_function	4.5574e-08	7.7144e-07	25	3767	32	12231	FBgn0032249,FBgn0262738,FBgn0028743,FBgn0026597,FBgn0015269,FBgn0031233,FBgn0027509,FBgn0032821,FBgn0264895,FBgn0038747,FBgn0024941,FBgn0262125,FBgn0085437,FBgn0261570,FBgn0004390,FBgn0035227,FBgn0003041,FBgn0003969,FBgn0028509,FBgn0020278,FBgn0086356,FBgn0005198,FBgn0025836,FBgn0265597,FBgn0038855
GO:0007293	germarium-derived egg chamber formation	biological_process	4.6935e-08	7.9311e-07	60	3767	107	12231	FBgn0015754,FBgn0043903,FBgn0016917,FBgn0034072,FBgn0010316,FBgn0262739,FBgn0003483,FBgn0002121,FBgn0003330,FBgn0259876,FBgn0263396,FBgn0039632,FBgn0028734,FBgn0015797,FBgn0026722,FBgn0036740,FBgn0262527,FBgn0036059,FBgn0003041,FBgn0000221,FBgn0037146,FBgn0262081,FBgn0000163,FBgn0263929,FBgn0267727,FBgn0000114,FBgn0261285,FBgn0010215,FBgn0000711,FBgn0033897,FBgn0022027,FBgn0010341,FBgn0030753,FBg…
GO:0048639	positive regulation of developmental growth	biological_process	4.7474e-08	8.0083e-07	39	3767	60	12231	FBgn0010379,FBgn0011817,FBgn0261524,FBgn0015279,FBgn0036257,FBgn0261786,FBgn0011571,FBgn0011300,FBgn0024277,FBgn0024179,FBgn0037884,FBgn0024234,FBgn0263111,FBgn0261811,FBgn0266756,FBgn0039924,FBgn0034265,FBgn0052418,FBgn0267698,FBgn0011642,FBgn0263933,FBgn0001624,FBgn0037874,FBgn0266557,FBgn0038063,FBgn0261788,FBgn0053094,FBgn0003867,FBgn0035590,FBgn0010415,FBgn0030530,FBgn0038747,FBgn0021796,FBg…
GO:0048599	oocyte development	biological_process	4.7597e-08	8.0151e-07	73	3767	138	12231	FBgn0015797,FBgn0016081,FBgn0031985,FBgn0086371,FBgn0026181,FBgn0002121,FBgn0261397,FBgn0002926,FBgn0000533,FBgn0041775,FBgn0003450,FBgn0026431,FBgn0259243,FBgn0004242,FBgn0040294,FBgn0000181,FBgn0004838,FBgn0259139,FBgn0004875,FBgn0261014,FBgn0264492,FBgn0262526,FBgn0038167,FBgn0027948,FBgn0267350,FBgn0260940,FBgn0004882,FBgn0037573,FBgn0021760,FBgn0000183,FBgn0086362,FBgn0003520,FBgn0000562,FBg…
GO:0033365	protein localization to organelle	biological_process	4.7773e-08	8.0309e-07	84	3767	165	12231	FBgn0003268,FBgn0261385,FBgn0003310,FBgn0030530,FBgn0010747,FBgn0262647,FBgn0001079,FBgn0023423,FBgn0039120,FBgn0026207,FBgn0000482,FBgn0045073,FBgn0262866,FBgn0001235,FBgn0035295,FBgn0024921,FBgn0031456,FBgn0265174,FBgn0000253,FBgn0031145,FBgn0041585,FBgn0010660,FBgn0022213,FBgn0036928,FBgn0000352,FBgn0020647,FBgn0016041,FBgn0004644,FBgn0040340,FBgn0024509,FBgn0033264,FBgn0061200,FBgn0035947,FBg…
GO:0034248	regulation of cellular amide metabolic process	biological_process	4.8363e-08	8.1162e-07	68	3767	126	12231	FBgn0035916,FBgn0034068,FBgn0041188,FBgn0262473,FBgn0260935,FBgn0004838,FBgn0259139,FBgn0031145,FBgn0016070,FBgn0262526,FBgn0003520,FBgn0250753,FBgn0036239,FBgn0026083,FBgn0022787,FBgn0024222,FBgn0038100,FBgn0004882,FBgn0052133,FBgn0015279,FBgn0041191,FBgn0087039,FBgn0265137,FBgn0262739,FBgn0011666,FBgn0030310,FBgn0028426,FBgn0053100,FBgn0014018,FBgn0040227,FBgn0000182,FBgn0033029,FBgn0027835,FBg…
GO:0051050	positive regulation of transport	biological_process	5.0975e-08	8.5398e-07	53	3767	91	12231	FBgn0023423,FBgn0005411,FBgn0001079,FBgn0259824,FBgn0000183,FBgn0031030,FBgn0259173,FBgn0037100,FBgn0030329,FBgn0086372,FBgn0261385,FBgn0267002,FBgn0038747,FBgn0038065,FBgn0264006,FBgn0033260,FBgn0002973,FBgn0259174,FBgn0265174,FBgn0000253,FBgn0041585,FBgn0011692,FBgn0045073,FBgn0000319,FBgn0262743,FBgn0086357,FBgn0027338,FBgn0004644,FBgn0030057,FBgn0000017,FBgn0030341,FBgn0036141,FBgn0011225,FBg…
GO:0001071	nucleic acid binding transcription factor activity	molecular_function	5.4037e-08	9.0218e-07	187	3767	442	12231	FBgn0004914,FBgn0004870,FBgn0000448,FBgn0023091,FBgn0261641,FBgn0001978,FBgn0015381,FBgn0263772,FBgn0005659,FBgn0000289,FBgn0028993,FBgn0029711,FBgn0015919,FBgn0002733,FBgn0035518,FBgn0003870,FBgn0038402,FBgn0261588,FBgn0001138,FBgn0035769,FBgn0002576,FBgn0011277,FBgn0003687,FBgn0023076,FBgn0028550,FBgn0259938,FBgn0266450,FBgn0004862,FBgn0263072,FBgn0038063,FBgn0000568,FBgn0019650,FBgn0028926,FBg…
GO:0003700	transcription factor activity, sequence-specific DNA binding	molecular_function	5.4037e-08	9.0218e-07	187	3767	442	12231	FBgn0003334,FBgn0265276,FBgn0021872,FBgn0024909,FBgn0015371,FBgn0000099,FBgn0004510,FBgn0004795,FBgn0001180,FBgn0000577,FBgn0025800,FBgn0003430,FBgn0011836,FBgn0029504,FBgn0001168,FBgn0039938,FBgn0033749,FBgn0261963,FBgn0002441,FBgn0264075,FBgn0010356,FBgn0010280,FBgn0003720,FBgn0045759,FBgn0004837,FBgn0034985,FBgn0039286,FBgn0035993,FBgn0004102,FBgn0005561,FBgn0010417,FBgn0013263,FBgn0001320,FBg…
GO:0045466	R7 cell differentiation	biological_process	5.5331e-08	9.2222e-07	37	3767	56	12231	FBgn0261617,FBgn0046704,FBgn0000382,FBgn0004449,FBgn0010269,FBgn0264075,FBgn0001233,FBgn0261648,FBgn0000206,FBgn0003513,FBgn0001965,FBgn0017590,FBgn0000464,FBgn0001202,FBgn0003310,FBgn0031745,FBgn0004638,FBgn0003651,FBgn0011217,FBgn0000097,FBgn0020224,FBgn0016794,FBgn0032929,FBgn0003256,FBgn0015797,FBgn0004390,FBgn0003410,FBgn0003870,FBgn0004177,FBgn0003731,FBgn0003118,FBgn0041184,FBgn0028500,FBg…
GO:0003677	DNA binding	molecular_function	5.7404e-08	9.5513e-07	330	3767	851	12231	FBgn0031391,FBgn0011764,FBgn0031876,FBgn0024191,FBgn0086680,FBgn0026373,FBgn0004652,FBgn0005596,FBgn0011766,FBgn0004913,FBgn0036398,FBgn0264954,FBgn0004401,FBgn0004859,FBgn0031947,FBgn0003567,FBgn0020633,FBgn0014143,FBgn0005658,FBgn0023518,FBgn0016034,FBgn0033081,FBgn0004878,FBgn0265574,FBgn0030477,FBgn0040283,FBgn0013756,FBgn0028982,FBgn0025525,FBgn0000370,FBgn0033183,FBgn0085444,FBgn0054031,FBg…
GO:0030239	myofibril assembly	biological_process	5.8973e-08	9.7957e-07	27	3767	36	12231	FBgn0041096,FBgn0005666,FBgn0036641,FBgn0086368,FBgn0004028,FBgn0036044,FBgn0000709,FBgn0002773,FBgn0000667,FBgn0264695,FBgn0004169,FBgn0000047,FBgn0025391,FBgn0035917,FBgn0001250,FBgn0038294,FBgn0053208,FBgn0003292,FBgn0265991,FBgn0086906,FBgn0014863,FBgn0265434,FBgn0034072,FBgn0003149,FBgn0259228,FBgn0053519,FBgn0265356
GO:0030695	GTPase regulator activity	molecular_function	5.9168e-08	9.8114e-07	27	3767	36	12231	FBgn0027509,FBgn0031233,FBgn0032821,FBgn0028743,FBgn0015269,FBgn0026597,FBgn0038747,FBgn0004868,FBgn0040080,FBgn0264895,FBgn0262738,FBgn0032249,FBgn0020278,FBgn0003969,FBgn0028509,FBgn0265597,FBgn0038855,FBgn0086356,FBgn0005198,FBgn0025836,FBgn0085437,FBgn0262125,FBgn0024941,FBgn0035227,FBgn0003041,FBgn0261570,FBgn0004390
GO:0070161	anchoring junction	cellular_component	5.9818e-08	9.9024e-07	48	3767	80	12231	FBgn0037737,FBgn0020440,FBgn0033987,FBgn0034540,FBgn0000163,FBgn0259745,FBgn0267698,FBgn0259212,FBgn0041096,FBgn0004397,FBgn0261873,FBgn0010215,FBgn0000017,FBgn0053193,FBgn0266671,FBgn0033984,FBgn0000723,FBgn0000547,FBgn0025743,FBgn0011739,FBgn0000499,FBgn0035101,FBgn0000008,FBgn0265991,FBgn0000244,FBgn0031850,FBgn0035539,FBgn0011202,FBgn0000578,FBgn0033504,FBgn0051158,FBgn0004167,FBgn0037182,FBg…
GO:0051241	negative regulation of multicellular organismal process	biological_process	6.2276e-08	1.0292e-06	76	3767	146	12231	FBgn0029840,FBgn0266450,FBgn0261648,FBgn0262866,FBgn0265998,FBgn0041171,FBgn0262733,FBgn0011581,FBgn0015589,FBgn0259483,FBgn0260635,FBgn0266053,FBgn0012051,FBgn0020493,FBgn0031005,FBgn0267002,FBgn0015269,FBgn0011648,FBgn0000097,FBgn0020279,FBgn0002783,FBgn0023423,FBgn0010379,FBgn0002121,FBgn0004870,FBgn0014388,FBgn0000547,FBgn0003124,FBgn0000578,FBgn0266717,FBgn0004177,FBgn0262127,FBgn0001122,FBg…
GO:0007297	ovarian follicle cell migration	biological_process	6.7448e-08	1.1128e-06	66	3767	122	12231	FBgn0032409,FBgn0263396,FBgn0036059,FBgn0043903,FBgn0266671,FBgn0015754,FBgn0000499,FBgn0011739,FBgn0034009,FBgn0032363,FBgn0041096,FBgn0261456,FBgn0264695,FBgn0261285,FBgn0020620,FBgn0003731,FBgn0041184,FBgn0005638,FBgn0000163,FBgn0031450,FBgn0266521,FBgn0010303,FBgn0003079,FBgn0039232,FBgn0267390,FBgn0260934,FBgn0031304,FBgn0053558,FBgn0003416,FBgn0264442,FBgn0085443,FBgn0000578,FBgn0265434,FBg…
GO:0097479	synaptic vesicle localization	biological_process	7.1499e-08	1.177e-06	63	3767	115	12231	FBgn0003392,FBgn0031450,FBgn0010380,FBgn0053094,FBgn0026479,FBgn0030230,FBgn0266758,FBgn0046704,FBgn0024814,FBgn0026313,FBgn0031106,FBgn0013342,FBgn0010300,FBgn0266667,FBgn0030089,FBgn0266719,FBgn0000319,FBgn0259824,FBgn0000183,FBgn0260964,FBgn0003360,FBgn0001108,FBgn0267002,FBgn0030505,FBgn0086372,FBgn0031455,FBgn0027575,FBgn0011708,FBgn0264855,FBgn0053653,FBgn0053547,FBgn0263968,FBgn0039132,FBg…
GO:0002164	larval development	biological_process	7.1583e-08	1.177e-06	63	3767	115	12231	FBgn0000490,FBgn0028992,FBgn0010452,FBgn0038341,FBgn0053208,FBgn0034728,FBgn0262527,FBgn0265726,FBgn0262125,FBgn0082585,FBgn0027053,FBgn0010389,FBgn0002121,FBgn0003507,FBgn0082598,FBgn0016917,FBgn0004396,FBgn0004924,FBgn0266671,FBgn0262467,FBgn0015279,FBgn0003319,FBgn0004864,FBgn0000711,FBgn0015513,FBgn0030343,FBgn0002576,FBgn0011225,FBgn0010770,FBgn0030855,FBgn0024509,FBgn0004197,FBgn0004644,FBg…
GO:0008270	zinc ion binding	molecular_function	7.2969e-08	1.1978e-06	261	3767	653	12231	FBgn0036621,FBgn0011836,FBgn0039875,FBgn0025638,FBgn0036333,FBgn0259209,FBgn0265597,FBgn0003334,FBgn0259824,FBgn0033739,FBgn0004395,FBgn0041582,FBgn0037705,FBgn0260003,FBgn0033752,FBgn0037182,FBgn0039688,FBgn0039486,FBgn0263603,FBgn0020304,FBgn0265991,FBgn0265726,FBgn0085430,FBgn0032020,FBgn0035704,FBgn0014366,FBgn0030600,FBgn0028509,FBgn0003330,FBgn0038301,FBgn0086908,FBgn0031498,FBgn0027951,FBg…
GO:0008361	regulation of cell size	biological_process	7.6052e-08	1.2463e-06	41	3767	65	12231	FBgn0026375,FBgn0002914,FBgn0046704,FBgn0037491,FBgn0037874,FBgn0267390,FBgn0261560,FBgn0003525,FBgn0027497,FBgn0015806,FBgn0034012,FBgn0041111,FBgn0026317,FBgn0000464,FBgn0023169,FBgn0041781,FBgn0021796,FBgn0035411,FBgn0011708,FBgn0019990,FBgn0014133,FBgn0003041,FBgn0020386,FBgn0041191,FBgn0040505,FBgn0015279,FBgn0024329,FBgn0261524,FBgn0025836,FBgn0005198,FBgn0010379,FBgn0025743,FBgn0052380,FBg…
GO:0060249	anatomical structure homeostasis	biological_process	8.6865e-08	1.4211e-06	59	3767	106	12231	FBgn0262114,FBgn0034072,FBgn0015754,FBgn0266671,FBgn0086901,FBgn0003507,FBgn0261549,FBgn0265356,FBgn0041100,FBgn0034728,FBgn0031540,FBgn0086657,FBgn0004169,FBgn0010238,FBgn0263864,FBgn0010328,FBgn0262081,FBgn0003731,FBgn0086442,FBgn0261458,FBgn0262738,FBgn0037248,FBgn0033059,FBgn0033483,FBgn0022027,FBgn0003218,FBgn0265998,FBgn0002921,FBgn0034070,FBgn0002901,FBgn0045035,FBgn0004657,FBgn0250906,FBg…
GO:0051321	meiotic cell cycle	biological_process	9.1616e-08	1.4963e-06	92	3767	187	12231	FBgn0263930,FBgn0020255,FBgn0028434,FBgn0267351,FBgn0003371,FBgn0265297,FBgn0260399,FBgn0017577,FBgn0026370,FBgn0000063,FBgn0034646,FBgn0005596,FBgn0003545,FBgn0035233,FBgn0032929,FBgn0037831,FBgn0003943,FBgn0261787,FBgn0001086,FBgn0036059,FBgn0260991,FBgn0011207,FBgn0014133,FBgn0011202,FBgn0039858,FBgn0011818,FBgn0267398,FBgn0000351,FBgn0004379,FBgn0004374,FBgn0040347,FBgn0024238,FBgn0033247,FBg…
GO:0051650	establishment of vesicle localization	biological_process	9.3267e-08	1.5208e-06	64	3767	118	12231	FBgn0086784,FBgn0266671,FBgn0027655,FBgn0263968,FBgn0020251,FBgn0024833,FBgn0004179,FBgn0027575,FBgn0053653,FBgn0264855,FBgn0011708,FBgn0053547,FBgn0027363,FBgn0040281,FBgn0028582,FBgn0000115,FBgn0030057,FBgn0261722,FBgn0038816,FBgn0010300,FBgn0031106,FBgn0026313,FBgn0013342,FBgn0030089,FBgn0266667,FBgn0000319,FBgn0266758,FBgn0046704,FBgn0030230,FBgn0031450,FBgn0001108,FBgn0003360,FBgn0259824,FBg…
GO:0044093	positive regulation of molecular function	biological_process	9.7509e-08	1.5861e-06	52	3767	90	12231	FBgn0033902,FBgn0001222,FBgn0031458,FBgn0010303,FBgn0014340,FBgn0262733,FBgn0020510,FBgn0264492,FBgn0045073,FBgn0267390,FBgn0035851,FBgn0038063,FBgn0261108,FBgn0041188,FBgn0261268,FBgn0000273,FBgn0001079,FBgn0001123,FBgn0030613,FBgn0015269,FBgn0259216,FBgn0264006,FBgn0000351,FBgn0024326,FBgn0086657,FBgn0011764,FBgn0041707,FBgn0016081,FBgn0004623,FBgn0264922,FBgn0262559,FBgn0030018,FBgn0023178,FBg…
GO:0035023	regulation of Rho protein signal transduction	biological_process	9.7596e-08	1.5861e-06	23	3767	29	12231	FBgn0263706,FBgn0024277,FBgn0001965,FBgn0085447,FBgn0044823,FBgn0035802,FBgn0003041,FBgn0031216,FBgn0035761,FBgn0086901,FBgn0053519,FBgn0025836,FBgn0025740,FBgn0261556,FBgn0265082,FBgn0050440,FBgn0023172,FBgn0040068,FBgn0035574,FBgn0264598,FBgn0262562,FBgn0032796,FBgn0264707
GO:0070201	regulation of establishment of protein localization	biological_process	9.914e-08	1.6079e-06	44	3767	72	12231	FBgn0033260,FBgn0265174,FBgn0000253,FBgn0000250,FBgn0041585,FBgn0010660,FBgn0011692,FBgn0045073,FBgn0262866,FBgn0262743,FBgn0024921,FBgn0039282,FBgn0023423,FBgn0259824,FBgn0001079,FBgn0032052,FBgn0029818,FBgn0026207,FBgn0259685,FBgn0041582,FBgn0037015,FBgn0267002,FBgn0261385,FBgn0038747,FBgn0038065,FBgn0027575,FBgn0031461,FBgn0014366,FBgn0052654,FBgn0086358,FBgn0029709,FBgn0010379,FBgn0264493,FBg…
GO:0050954	sensory perception of mechanical stimulus	biological_process	9.927e-08	1.6079e-06	44	3767	72	12231	FBgn0000121,FBgn0261004,FBgn0262111,FBgn0266709,FBgn0036199,FBgn0036414,FBgn0002917,FBgn0005614,FBgn0014395,FBgn0010399,FBgn0010341,FBgn0002921,FBgn0261648,FBgn0000317,FBgn0027066,FBgn0000253,FBgn0003353,FBgn0086690,FBgn0259099,FBgn0013812,FBgn0004618,FBgn0039232,FBgn0261788,FBgn0053513,FBgn0010433,FBgn0034745,FBgn0265102,FBgn0016920,FBgn0260005,FBgn0016047,FBgn0013810,FBgn0023096,FBgn0037726,FBg…
GO:0051338	regulation of transferase activity	biological_process	1.0143e-07	1.6393e-06	58	3767	104	12231	FBgn0032725,FBgn0000063,FBgn0262699,FBgn0061476,FBgn0015625,FBgn0026326,FBgn0020440,FBgn0026323,FBgn0037816,FBgn0010909,FBgn0003371,FBgn0010433,FBgn0028546,FBgn0263237,FBgn0261786,FBgn0259791,FBgn0030018,FBgn0264848,FBgn0024326,FBgn0264922,FBgn0003884,FBgn0044324,FBgn0016081,FBgn0025455,FBgn0027053,FBgn0032378,FBgn0001086,FBgn0002121,FBgn0025743,FBgn0261524,FBgn0040505,FBgn0035640,FBgn0010316,FBg…
GO:0005819	spindle	cellular_component	1.0154e-07	1.6393e-06	55	3767	97	12231	FBgn0011606,FBgn0027948,FBgn0000405,FBgn0032105,FBgn0030268,FBgn0086757,FBgn0026620,FBgn0024227,FBgn0013756,FBgn0002924,FBgn0000253,FBgn0027066,FBgn0011692,FBgn0002873,FBgn0264291,FBgn0003268,FBgn0260639,FBgn0001108,FBgn0004378,FBgn0004379,FBgn0036814,FBgn0263197,FBgn0039936,FBgn0011205,FBgn0015600,FBgn0021760,FBgn0026430,FBgn0031020,FBgn0011661,FBgn0003545,FBgn0015754,FBgn0035640,FBgn0086356,FBg…
GO:0031400	negative regulation of protein modification process	biological_process	1.0274e-07	1.6559e-06	48	3767	81	12231	FBgn0013756,FBgn0001332,FBgn0034577,FBgn0031044,FBgn0011737,FBgn0010314,FBgn0040206,FBgn0037826,FBgn0264492,FBgn0041171,FBgn0012058,FBgn0031450,FBgn0026192,FBgn0004638,FBgn0003053,FBgn0010382,FBgn0036844,FBgn0000351,FBgn0003268,FBgn0020224,FBgn0015399,FBgn0011217,FBgn0041100,FBgn0027053,FBgn0028429,FBgn0002121,FBgn0001086,FBgn0260749,FBgn0036964,FBgn0035640,FBgn0010316,FBgn0261786,FBgn0264848,FBg…
GO:0017038	protein import	biological_process	1.0297e-07	1.6568e-06	48	3767	81	12231	FBgn0262647,FBgn0033737,FBgn0261385,FBgn0026207,FBgn0041582,FBgn0266580,FBgn0001079,FBgn0039120,FBgn0023423,FBgn0027868,FBgn0024921,FBgn0013756,FBgn0262743,FBgn0087013,FBgn0045073,FBgn0262866,FBgn0041585,FBgn0010441,FBgn0011692,FBgn0010660,FBgn0033260,FBgn0031456,FBgn0000253,FBgn0000250,FBgn0031145,FBgn0000352,FBgn0003371,FBgn0267727,FBgn0034310,FBgn0022213,FBgn0028582,FBgn0033264,FBgn0061200,FBg…
GO:0098813	nuclear chromosome segregation	biological_process	1.096e-07	1.7607e-06	77	3767	150	12231	FBgn0040208,FBgn0061476,FBgn0026326,FBgn0035627,FBgn0086906,FBgn0004390,FBgn0003124,FBgn0003884,FBgn0260987,FBgn0044324,FBgn0031549,FBgn0039680,FBgn0035640,FBgn0261278,FBgn0024188,FBgn0263231,FBgn0261954,FBgn0021760,FBgn0052707,FBgn0261618,FBgn0004367,FBgn0260639,FBgn0003268,FBgn0003732,FBgn0260985,FBgn0262526,FBgn0040232,FBgn0002924,FBgn0034958,FBgn0004655,FBgn0030500,FBgn0015391,FBgn0086359,FBg…
GO:0046579	positive regulation of Ras protein signal transduction	biological_process	1.1066e-07	1.7719e-06	37	3767	57	12231	FBgn0010269,FBgn0035761,FBgn0261556,FBgn0011573,FBgn0259483,FBgn0020238,FBgn0263706,FBgn0035802,FBgn0039566,FBgn0001965,FBgn0003079,FBgn0262562,FBgn0032796,FBgn0021818,FBgn0035574,FBgn0037573,FBgn0043070,FBgn0038504,FBgn0031633,FBgn0003256,FBgn0050440,FBgn0025740,FBgn0025836,FBgn0024277,FBgn0037093,FBgn0264922,FBgn0040011,FBgn0015402,FBgn0037255,FBgn0263782,FBgn0023172,FBgn0031762,FBgn0044323,FBg…
GO:0051057	positive regulation of small GTPase mediated signal transduction	biological_process	1.1066e-07	1.7719e-06	37	3767	57	12231	FBgn0261119,FBgn0023172,FBgn0035437,FBgn0031762,FBgn0044323,FBgn0263782,FBgn0264598,FBgn0032388,FBgn0015402,FBgn0037255,FBgn0264922,FBgn0037093,FBgn0024277,FBgn0040011,FBgn0038504,FBgn0025740,FBgn0025836,FBgn0050440,FBgn0003256,FBgn0031633,FBgn0037573,FBgn0035574,FBgn0043070,FBgn0032796,FBgn0262562,FBgn0021818,FBgn0020238,FBgn0263706,FBgn0259483,FBgn0011573,FBgn0003079,FBgn0001965,FBgn0039566,FBg…
GO:0015629	actin cytoskeleton	cellular_component	1.154e-07	1.8417e-06	60	3767	109	12231	FBgn0261836,FBgn0004169,FBgn0086446,FBgn0267727,FBgn0004397,FBgn0023172,FBgn0261397,FBgn0031437,FBgn0011225,FBgn0034180,FBgn0003447,FBgn0010215,FBgn0264695,FBgn0034223,FBgn0040299,FBgn0003149,FBgn0026059,FBgn0031050,FBgn0033206,FBgn0015754,FBgn0002772,FBgn0010246,FBgn0004687,FBgn0031781,FBgn0086906,FBgn0265434,FBgn0044826,FBgn0011202,FBgn0014863,FBgn0035499,FBgn0261385,FBgn0001108,FBgn0004167,FBg…
GO:0044431	Golgi apparatus part	cellular_component	1.154e-07	1.8417e-06	60	3767	109	12231	FBgn0004509,FBgn0031530,FBgn0038223,FBgn0025724,FBgn0033901,FBgn0000115,FBgn0024187,FBgn0030930,FBgn0010348,FBgn0261787,FBgn0029830,FBgn0263005,FBgn0020655,FBgn0261279,FBgn0029709,FBgn0034697,FBgn0024833,FBgn0031985,FBgn0020251,FBgn0030662,FBgn0031842,FBgn0039132,FBgn0001087,FBgn0037603,FBgn0011708,FBgn0032117,FBgn0262125,FBgn0027287,FBgn0037884,FBgn0025725,FBgn0027558,FBgn0033339,FBgn0028969,FBg…
GO:0005912	adherens junction	cellular_component	1.1823e-07	1.8837e-06	47	3767	79	12231	FBgn0259685,FBgn0011661,FBgn0000667,FBgn0021818,FBgn0030530,FBgn0037182,FBgn0000464,FBgn0004167,FBgn0051158,FBgn0028427,FBgn0050372,FBgn0010415,FBgn0034577,FBgn0004657,FBgn0011642,FBgn0264959,FBgn0046704,FBgn0032731,FBgn0053193,FBgn0010215,FBgn0000017,FBgn0261873,FBgn0004397,FBgn0259212,FBgn0041096,FBgn0267698,FBgn0259745,FBgn0000163,FBgn0034540,FBgn0033987,FBgn0020440,FBgn0033504,FBgn0000578,FBg…
GO:0007391	dorsal closure	biological_process	1.1935e-07	1.8986e-06	57	3767	102	12231	FBgn0026181,FBgn0013997,FBgn0000499,FBgn0002121,FBgn0020392,FBgn0000547,FBgn0086901,FBgn0000723,FBgn0003507,FBgn0000490,FBgn0030018,FBgn0000578,FBgn0265434,FBgn0267488,FBgn0000299,FBgn0000633,FBgn0005536,FBgn0010909,FBgn0040294,FBgn0024234,FBgn0003731,FBgn0026323,FBgn0003388,FBgn0011225,FBgn0003312,FBgn0015513,FBgn0000017,FBgn0044323,FBgn0259212,FBgn0000449,FBgn0267698,FBgn0010434,FBgn0004657,FBg…
GO:0009719	response to endogenous stimulus	biological_process	1.2561e-07	1.994e-06	92	3767	188	12231	FBgn0011300,FBgn0265048,FBgn0033438,FBgn0010379,FBgn0000448,FBgn0030310,FBgn0010389,FBgn0002121,FBgn0004914,FBgn0010583,FBgn0014388,FBgn0015381,FBgn0086371,FBgn0015279,FBgn0037248,FBgn0022382,FBgn0013269,FBgn0004644,FBgn0085450,FBgn0040294,FBgn0027601,FBgn0038984,FBgn0038197,FBgn0000546,FBgn0029006,FBgn0001222,FBgn0000473,FBgn0266282,FBgn0020299,FBgn0023076,FBgn0010341,FBgn0000382,FBgn0000568,FBg…
GO:0051223	regulation of protein transport	biological_process	1.2593e-07	1.994e-06	42	3767	68	12231	FBgn0029709,FBgn0010379,FBgn0014366,FBgn0052654,FBgn0086358,FBgn0027575,FBgn0031461,FBgn0038984,FBgn0000352,FBgn0003371,FBgn0022213,FBgn0000017,FBgn0030341,FBgn0036141,FBgn0000115,FBgn0264493,FBgn0027338,FBgn0004644,FBgn0262743,FBgn0024921,FBgn0045073,FBgn0262866,FBgn0041585,FBgn0010660,FBgn0011692,FBgn0033260,FBgn0000253,FBgn0265174,FBgn0000250,FBgn0038747,FBgn0038065,FBgn0037015,FBgn0261385,FBg…
GO:0032386	regulation of intracellular transport	biological_process	1.2596e-07	1.994e-06	42	3767	68	12231	FBgn0265174,FBgn0000253,FBgn0000250,FBgn0033260,FBgn0010660,FBgn0011692,FBgn0041585,FBgn0262866,FBgn0045073,FBgn0262743,FBgn0024921,FBgn0023423,FBgn0005411,FBgn0001079,FBgn0259685,FBgn0041582,FBgn0032052,FBgn0029818,FBgn0026207,FBgn0261385,FBgn0015622,FBgn0262125,FBgn0250823,FBgn0024833,FBgn0052654,FBgn0086358,FBgn0014366,FBgn0015754,FBgn0029709,FBgn0010379,FBgn0002044,FBgn0264493,FBgn0027338,FBg…
GO:0071011	precatalytic spliceosome	cellular_component	1.2912e-07	2.0353e-06	76	3767	148	12231	FBgn0033062,FBgn0030365,FBgn0031492,FBgn0036487,FBgn0003261,FBgn0086444,FBgn0031601,FBgn0037573,FBgn0027617,FBgn0030468,FBgn0021895,FBgn0024998,FBgn0086895,FBgn0003742,FBgn0263599,FBgn0012058,FBgn0037466,FBgn0033089,FBgn0036915,FBgn0086683,FBgn0025571,FBgn0033160,FBgn0022959,FBgn0032388,FBgn0036207,FBgn0266917,FBgn0033210,FBgn0262735,FBgn0261641,FBgn0010774,FBgn0050342,FBgn0036277,FBgn0263198,FBg…
GO:0048489	synaptic vesicle transport	biological_process	1.292e-07	2.0353e-06	62	3767	114	12231	FBgn0086784,FBgn0261279,FBgn0002121,FBgn0010348,FBgn0016975,FBgn0013997,FBgn0027356,FBgn0039900,FBgn0266671,FBgn0027655,FBgn0039132,FBgn0263968,FBgn0261671,FBgn0024833,FBgn0020251,FBgn0004179,FBgn0027575,FBgn0264855,FBgn0053653,FBgn0011708,FBgn0053547,FBgn0035060,FBgn0027363,FBgn0004242,FBgn0003210,FBgn0040281,FBgn0039140,FBgn0028582,FBgn0266669,FBgn0266756,FBgn0000115,FBgn0030057,FBgn0034691,FBg…
GO:0097480	establishment of synaptic vesicle localization	biological_process	1.292e-07	2.0353e-06	62	3767	114	12231	FBgn0264855,FBgn0011708,FBgn0053653,FBgn0053547,FBgn0027575,FBgn0004179,FBgn0020251,FBgn0261671,FBgn0024833,FBgn0263968,FBgn0039132,FBgn0027655,FBgn0266671,FBgn0039900,FBgn0027356,FBgn0013997,FBgn0016975,FBgn0002121,FBgn0010348,FBgn0261279,FBgn0086784,FBgn0266757,FBgn0038816,FBgn0034691,FBgn0261722,FBgn0030057,FBgn0000115,FBgn0266756,FBgn0266669,FBgn0039140,FBgn0028582,FBgn0040281,FBgn0003210,FBg…
GO:0051235	maintenance of location	biological_process	1.3105e-07	2.0611e-06	50	3767	86	12231	FBgn0010215,FBgn0262738,FBgn0004397,FBgn0000352,FBgn0003090,FBgn0003210,FBgn0020440,FBgn0010350,FBgn0025724,FBgn0038197,FBgn0025391,FBgn0265434,FBgn0036816,FBgn0011202,FBgn0003041,FBgn0015320,FBgn0025725,FBgn0000244,FBgn0086356,FBgn0264357,FBgn0035101,FBgn0010379,FBgn0003557,FBgn0026181,FBgn0039114,FBgn0010348,FBgn0043884,FBgn0034072,FBgn0010051,FBgn0000667,FBgn0015575,FBgn0023423,FBgn0001250,FBg…
GO:0032269	negative regulation of cellular protein metabolic process	biological_process	1.3444e-07	2.1076e-06	82	3767	163	12231	FBgn0044324,FBgn0003884,FBgn0027054,FBgn0033029,FBgn0261786,FBgn0000182,FBgn0010316,FBgn0035640,FBgn0036964,FBgn0053100,FBgn0002121,FBgn0262739,FBgn0011666,FBgn0265137,FBgn0004644,FBgn0031047,FBgn0061476,FBgn0031885,FBgn0000114,FBgn0031973,FBgn0028546,FBgn0011474,FBgn0026326,FBgn0260635,FBgn0004838,FBgn0012058,FBgn0041171,FBgn0264492,FBgn0016070,FBgn0037826,FBgn0040206,FBgn0010314,FBgn0001332,FBg…
GO:0051248	negative regulation of protein metabolic process	biological_process	1.3444e-07	2.1076e-06	82	3767	163	12231	FBgn0011737,FBgn0260444,FBgn0034858,FBgn0085436,FBgn0261560,FBgn0013756,FBgn0028984,FBgn0031044,FBgn0031450,FBgn0000404,FBgn0028987,FBgn0003165,FBgn0005632,FBgn0263352,FBgn0003053,FBgn0000351,FBgn0036844,FBgn0037327,FBgn0015399,FBgn0264001,FBgn0011837,FBgn0259685,FBgn0001086,FBgn0028429,FBgn0041100,FBgn0027053,FBgn0017550,FBgn0260749,FBgn0263396,FBgn0264848,FBgn0028734,FBgn0261573,FBgn0020440,FBg…
GO:0051493	regulation of cytoskeleton organization	biological_process	1.3906e-07	2.1765e-06	56	3767	100	12231	FBgn0036480,FBgn0032859,FBgn0003392,FBgn0262733,FBgn0266521,FBgn0011692,FBgn0027948,FBgn0010341,FBgn0035761,FBgn0263987,FBgn0002924,FBgn0041188,FBgn0026371,FBgn0003502,FBgn0026620,FBgn0038369,FBgn0034577,FBgn0004657,FBgn0021760,FBgn0023423,FBgn0086362,FBgn0041111,FBgn0011661,FBgn0004378,FBgn0002466,FBgn0263197,FBgn0003475,FBgn0038747,FBgn0001250,FBgn0041781,FBgn0086657,FBgn0031781,FBgn0033845,FBg…
GO:0008544	epidermis development	biological_process	1.4153e-07	2.2118e-06	41	3767	66	12231	FBgn0035533,FBgn0003090,FBgn0001122,FBgn0001320,FBgn0010434,FBgn0004859,FBgn0259212,FBgn0004644,FBgn0264272,FBgn0003447,FBgn0002577,FBgn0001259,FBgn0000499,FBgn0026181,FBgn0001083,FBgn0002121,FBgn0001075,FBgn0005536,FBgn0016081,FBgn0265434,FBgn0014859,FBgn0261064,FBgn0016977,FBgn0262111,FBgn0037671,FBgn0011715,FBgn0003744,FBgn0039532,FBgn0003187,FBgn0260934,FBgn0015615,FBgn0263289,FBgn0010341,FBg…
GO:0042981	regulation of apoptotic process	biological_process	1.4382e-07	2.2439e-06	71	3767	136	12231	FBgn0037481,FBgn0031491,FBgn0030613,FBgn0045035,FBgn0261268,FBgn0000273,FBgn0035851,FBgn0004009,FBgn0022027,FBgn0086706,FBgn0003079,FBgn0042693,FBgn0004436,FBgn0003731,FBgn0003118,FBgn0025825,FBgn0261456,FBgn0260936,FBgn0027609,FBgn0053193,FBgn0264493,FBgn0261722,FBgn0051216,FBgn0011766,FBgn0029891,FBgn0011739,FBgn0043884,FBgn0051005,FBgn0032929,FBgn0020386,FBgn0262559,FBgn0019947,FBgn0010382,FBg…
GO:0043292	contractile fiber	cellular_component	1.5154e-07	2.3605e-06	32	3767	47	12231	FBgn0035499,FBgn0035917,FBgn0005666,FBgn0036641,FBgn0004028,FBgn0002773,FBgn0000667,FBgn0053519,FBgn0004117,FBgn0004657,FBgn0250906,FBgn0038294,FBgn0004169,FBgn0261836,FBgn0025391,FBgn0001091,FBgn0041096,FBgn0086442,FBgn0264695,FBgn0026059,FBgn0003149,FBgn0034072,FBgn0002772,FBgn0265356,FBgn0002789,FBgn0019947,FBgn0027052,FBgn0000064,FBgn0265991,FBgn0086906,FBgn0014863,FBgn0265434
GO:0055001	muscle cell development	biological_process	1.522e-07	2.3633e-06	32	3767	47	12231	FBgn0001250,FBgn0035917,FBgn0000047,FBgn0000667,FBgn0000097,FBgn0002773,FBgn0036641,FBgn0000709,FBgn0004028,FBgn0005666,FBgn0001308,FBgn0053519,FBgn0259228,FBgn0003292,FBgn0038294,FBgn0003118,FBgn0025391,FBgn0004169,FBgn0264695,FBgn0086368,FBgn0036044,FBgn0041096,FBgn0010389,FBgn0265356,FBgn0014388,FBgn0003149,FBgn0034072,FBgn0014863,FBgn0265434,FBgn0086906,FBgn0053208,FBgn0265991
GO:0055002	striated muscle cell development	biological_process	1.522e-07	2.3633e-06	32	3767	47	12231	FBgn0001308,FBgn0053519,FBgn0259228,FBgn0038294,FBgn0003292,FBgn0001250,FBgn0035917,FBgn0000047,FBgn0000667,FBgn0002773,FBgn0000097,FBgn0036641,FBgn0004028,FBgn0000709,FBgn0005666,FBgn0010389,FBgn0265356,FBgn0014388,FBgn0003149,FBgn0034072,FBgn0014863,FBgn0265434,FBgn0086906,FBgn0053208,FBgn0265991,FBgn0003118,FBgn0025391,FBgn0004169,FBgn0264695,FBgn0036044,FBgn0086368,FBgn0041096
GO:0005085	guanyl-nucleotide exchange factor activity	molecular_function	1.5398e-07	2.3872e-06	45	3767	75	12231	FBgn0031107,FBgn0032198,FBgn0025836,FBgn0265082,FBgn0050440,FBgn0261787,FBgn0085443,FBgn0024277,FBgn0085447,FBgn0031985,FBgn0003041,FBgn0031216,FBgn0032020,FBgn0038303,FBgn0031762,FBgn0023172,FBgn0026179,FBgn0028500,FBgn0264598,FBgn0015513,FBgn0035761,FBgn0023512,FBgn0034858,FBgn0037874,FBgn0259228,FBgn0053519,FBgn0264560,FBgn0260860,FBgn0035229,FBgn0261556,FBgn0028538,FBgn0263706,FBgn0001965,FBg…
GO:0051348	negative regulation of transferase activity	biological_process	1.5723e-07	2.4337e-06	31	3767	45	12231	FBgn0261786,FBgn0041171,FBgn0264848,FBgn0012058,FBgn0044324,FBgn0003884,FBgn0002121,FBgn0013756,FBgn0001086,FBgn0027053,FBgn0031044,FBgn0010314,FBgn0035640,FBgn0011737,FBgn0040206,FBgn0015399,FBgn0020224,FBgn0011217,FBgn0000063,FBgn0061476,FBgn0262699,FBgn0020440,FBgn0010382,FBgn0026326,FBgn0004638,FBgn0026192,FBgn0003371,FBgn0000351,FBgn0036844,FBgn0003268,FBgn0028546
GO:0045448	mitotic cell cycle, embryonic	biological_process	1.5918e-07	2.4599e-06	28	3767	39	12231	FBgn0011202,FBgn0002441,FBgn0033081,FBgn0000404,FBgn0003042,FBgn0028734,FBgn0264922,FBgn0034314,FBgn0261823,FBgn0026371,FBgn0002901,FBgn0011020,FBgn0010314,FBgn0011737,FBgn0005624,FBgn0261278,FBgn0000405,FBgn0032105,FBgn0000173,FBgn0015600,FBgn0013263,FBgn0000629,FBgn0015625,FBgn0003525,FBgn0004374,FBgn0086899,FBgn0261618,FBgn0004367
GO:0000139	Golgi membrane	cellular_component	1.5991e-07	2.4673e-06	30	3767	43	12231	FBgn0038223,FBgn0028969,FBgn0008635,FBgn0025724,FBgn0004509,FBgn0024994,FBgn0011740,FBgn0033901,FBgn0031676,FBgn0026616,FBgn0260744,FBgn0024814,FBgn0000319,FBgn0030089,FBgn0031106,FBgn0029709,FBgn0263005,FBgn0037050,FBgn0011708,FBgn0032117,FBgn0028968,FBgn0037603,FBgn0025725,FBgn0027287,FBgn0044871,FBgn0036919,FBgn0030662,FBgn0024833,FBgn0010380,FBgn0039132
GO:1903046	meiotic cell cycle process	biological_process	1.7653e-07	2.7195e-06	90	3767	184	12231	FBgn0261278,FBgn0002431,FBgn0011020,FBgn0025725,FBgn0003124,FBgn0004390,FBgn0003041,FBgn0026431,FBgn0036486,FBgn0035627,FBgn0027889,FBgn0015546,FBgn0031536,FBgn0262468,FBgn0004373,FBgn0011826,FBgn0014857,FBgn0027948,FBgn0011606,FBgn0261239,FBgn0010314,FBgn0264694,FBgn0002901,FBgn0002924,FBgn0004655,FBgn0262526,FBgn0264291,FBgn0002873,FBgn0260985,FBgn0011659,FBgn0053094,FBgn0004106,FBgn0261385,FBg…
GO:0060548	negative regulation of cell death	biological_process	1.8582e-07	2.8581e-06	51	3767	89	12231	FBgn0003731,FBgn0004436,FBgn0003118,FBgn0040294,FBgn0265297,FBgn0051216,FBgn0261456,FBgn0052418,FBgn0262738,FBgn0001977,FBgn0025825,FBgn0032929,FBgn0043884,FBgn0051005,FBgn0038570,FBgn0003256,FBgn0029891,FBgn0001086,FBgn0010379,FBgn0035713,FBgn0019947,FBgn0266717,FBgn0020386,FBgn0015509,FBgn0243511,FBgn0031491,FBgn0037481,FBgn0031851,FBgn0023423,FBgn0002573,FBgn0000108,FBgn0002622,FBgn0028484,FBg…
GO:0043408	regulation of MAPK cascade	biological_process	1.8674e-07	2.8678e-06	57	3767	103	12231	FBgn0024329,FBgn0040505,FBgn0038504,FBgn0003256,FBgn0025743,FBgn0031633,FBgn0041100,FBgn0261524,FBgn0024326,FBgn0037093,FBgn0264922,FBgn0030018,FBgn0040011,FBgn0015402,FBgn0037255,FBgn0010433,FBgn0028546,FBgn0020440,FBgn0026323,FBgn0040281,FBgn0003371,FBgn0010909,FBgn0031885,FBgn0263782,FBgn0259212,FBgn0044323,FBgn0035437,FBgn0264493,FBgn0261119,FBgn0013987,FBgn0032388,FBgn0000711,FBgn0086346,FBg…
GO:0010639	negative regulation of organelle organization	biological_process	1.9952e-07	3.0592e-06	43	3767	71	12231	FBgn0000404,FBgn0042085,FBgn0036480,FBgn0263987,FBgn0013756,FBgn0026620,FBgn0034577,FBgn0021760,FBgn0002775,FBgn0004378,FBgn0003268,FBgn0263197,FBgn0038747,FBgn0027575,FBgn0033845,FBgn0250823,FBgn0044324,FBgn0003884,FBgn0000137,FBgn0035640,FBgn0036257,FBgn0024329,FBgn0038814,FBgn0029891,FBgn0039227,FBgn0261787,FBgn0041100,FBgn0036964,FBgn0260749,FBgn0000063,FBgn0003567,FBgn0030082,FBgn0061476,FBg…
GO:0045664	regulation of neuron differentiation	biological_process	2.1078e-07	3.2268e-06	59	3767	108	12231	FBgn0025741,FBgn0030276,FBgn0024836,FBgn0000097,FBgn0034012,FBgn0011217,FBgn0000464,FBgn0267002,FBgn0004638,FBgn0000606,FBgn0040372,FBgn0026375,FBgn0039234,FBgn0002932,FBgn0003079,FBgn0003430,FBgn0003744,FBgn0000382,FBgn0010341,FBgn0262866,FBgn0001235,FBgn0046704,FBgn0003513,FBgn0029688,FBgn0266450,FBgn0264075,FBgn0267698,FBgn0023172,FBgn0259984,FBgn0030057,FBgn0053193,FBgn0005561,FBgn0004102,FBg…
GO:0043410	positive regulation of MAPK cascade	biological_process	2.2572e-07	3.4484e-06	42	3767	69	12231	FBgn0035437,FBgn0044323,FBgn0264493,FBgn0261119,FBgn0263782,FBgn0031885,FBgn0086346,FBgn0032388,FBgn0015402,FBgn0037255,FBgn0010433,FBgn0010909,FBgn0026323,FBgn0264922,FBgn0024326,FBgn0037093,FBgn0030018,FBgn0040011,FBgn0038504,FBgn0024329,FBgn0040505,FBgn0261524,FBgn0025743,FBgn0003256,FBgn0031633,FBgn0037573,FBgn0036932,FBgn0036934,FBgn0030613,FBgn0021818,FBgn0004638,FBgn0086677,FBgn0259483,FBg…
GO:0051962	positive regulation of nervous system development	biological_process	2.2655e-07	3.4484e-06	42	3767	69	12231	FBgn0003317,FBgn0261854,FBgn0011648,FBgn0034012,FBgn0000097,FBgn0038747,FBgn0004638,FBgn0002735,FBgn0040372,FBgn0259174,FBgn0017418,FBgn0010415,FBgn0261788,FBgn0259176,FBgn0003430,FBgn0003079,FBgn0013469,FBgn0053094,FBgn0001624,FBgn0038063,FBgn0029688,FBgn0267698,FBgn0004102,FBgn0034265,FBgn0024234,FBgn0263111,FBgn0024179,FBgn0039306,FBgn0024277,FBgn0037884,FBgn0262125,FBgn0044826,FBgn0034697,FBg…
GO:0000165	MAPK cascade	biological_process	2.2667e-07	3.4484e-06	66	3767	125	12231	FBgn0020238,FBgn0086677,FBgn0011573,FBgn0003079,FBgn0039566,FBgn0010303,FBgn0264959,FBgn0031044,FBgn0003502,FBgn0030613,FBgn0036934,FBgn0036844,FBgn0003053,FBgn0264922,FBgn0024326,FBgn0040011,FBgn0030018,FBgn0024329,FBgn0261524,FBgn0041100,FBgn0025743,FBgn0264493,FBgn0261119,FBgn0259212,FBgn0267698,FBgn0000711,FBgn0010433,FBgn0037255,FBgn0003371,FBgn0040281,FBgn0020440,FBgn0024811,FBgn0259483,FBg…
GO:0023014	signal transduction by protein phosphorylation	biological_process	2.2667e-07	3.4484e-06	66	3767	125	12231	FBgn0024329,FBgn0261524,FBgn0041100,FBgn0025743,FBgn0264922,FBgn0024326,FBgn0040011,FBgn0030018,FBgn0010433,FBgn0037255,FBgn0003371,FBgn0040281,FBgn0020440,FBgn0261119,FBgn0264493,FBgn0259212,FBgn0267698,FBgn0000711,FBgn0264959,FBgn0031044,FBgn0003502,FBgn0020238,FBgn0086677,FBgn0011573,FBgn0003079,FBgn0039566,FBgn0010303,FBgn0036844,FBgn0003053,FBgn0030613,FBgn0036934,FBgn0038504,FBgn0040505,FBg…
GO:0009628	response to abiotic stimulus	biological_process	2.5239e-07	3.8338e-06	157	3767	367	12231	FBgn0036300,FBgn0004367,FBgn0029117,FBgn0086686,FBgn0014395,FBgn0002174,FBgn0002921,FBgn0259168,FBgn0001624,FBgn0261617,FBgn0263987,FBgn0052423,FBgn0002901,FBgn0003248,FBgn0261985,FBgn0041171,FBgn0031322,FBgn0263864,FBgn0010350,FBgn0004177,FBgn0027375,FBgn0031885,FBgn0261109,FBgn0016917,FBgn0020278,FBgn0261278,FBgn0265193,FBgn0250823,FBgn0264785,FBgn0000153,FBgn0029174,FBgn0023178,FBgn0261532,FBg…
GO:0035265	organ growth	biological_process	2.5633e-07	3.8875e-06	41	3767	67	12231	FBgn0026317,FBgn0259685,FBgn0015806,FBgn0020279,FBgn0038755,FBgn0031030,FBgn0030530,FBgn0021796,FBgn0032475,FBgn0003944,FBgn0000179,FBgn0264326,FBgn0011642,FBgn0039861,FBgn0001332,FBgn0263933,FBgn0004009,FBgn0266557,FBgn0263289,FBgn0053193,FBgn0261456,FBgn0052418,FBgn0010575,FBgn0004644,FBgn0003612,FBgn0263930,FBgn0263598,FBgn0020251,FBgn0020386,FBgn0000490,FBgn0001075,FBgn0028734,FBgn0011739,FBg…
GO:1903649	regulation of cytoplasmic transport	biological_process	2.5796e-07	3.9062e-06	35	3767	54	12231	FBgn0041585,FBgn0010660,FBgn0011692,FBgn0033260,FBgn0000253,FBgn0265174,FBgn0000250,FBgn0262743,FBgn0024921,FBgn0045073,FBgn0262866,FBgn0032052,FBgn0029818,FBgn0026207,FBgn0041582,FBgn0005411,FBgn0023423,FBgn0001079,FBgn0261385,FBgn0015622,FBgn0262125,FBgn0002044,FBgn0029709,FBgn0010379,FBgn0014366,FBgn0052654,FBgn0086358,FBgn0000017,FBgn0000115,FBgn0264493,FBgn0027338,FBgn0004644,FBgn0000352,FBg…
GO:0042995	cell projection	cellular_component	2.5841e-07	3.907e-06	138	3767	315	12231	FBgn0265512,FBgn0004242,FBgn0261811,FBgn0013811,FBgn0267435,FBgn0013810,FBgn0083946,FBgn0262738,FBgn0026388,FBgn0037594,FBgn0016920,FBgn0034691,FBgn0025879,FBgn0029830,FBgn0038814,FBgn0000578,FBgn0260004,FBgn0004380,FBgn0037254,FBgn0053208,FBgn0033438,FBgn0037989,FBgn0016081,FBgn0000384,FBgn0002787,FBgn0267002,FBgn0050441,FBgn0031255,FBgn0067317,FBgn0000206,FBgn0016797,FBgn0003218,FBgn0261788,FBg…
GO:0000910	cytokinesis	biological_process	2.9066e-07	4.3878e-06	57	3767	104	12231	FBgn0011661,FBgn0041111,FBgn0015399,FBgn0013718,FBgn0011205,FBgn0267378,FBgn0004379,FBgn0035762,FBgn0261385,FBgn0004167,FBgn0004635,FBgn0002466,FBgn0264291,FBgn0011692,FBgn0053094,FBgn0002914,FBgn0026479,FBgn0263979,FBgn0003392,FBgn0262473,FBgn0000042,FBgn0028968,FBgn0024227,FBgn0053554,FBgn0014029,FBgn0032848,FBgn0032105,FBgn0000405,FBgn0011606,FBgn0031536,FBgn0000711,FBgn0262468,FBgn0004373,FBg…
GO:0098772	molecular function regulator	molecular_function	2.9259e-07	4.4101e-06	156	3767	365	12231	FBgn0262125,FBgn0038744,FBgn0039155,FBgn0020278,FBgn0031107,FBgn0039527,FBgn0265137,FBgn0261109,FBgn0023172,FBgn0031973,FBgn0015513,FBgn0263864,FBgn0035504,FBgn0004177,FBgn0038303,FBgn0263706,FBgn0024941,FBgn0261108,FBgn0024314,FBgn0036428,FBgn0010314,FBgn0261556,FBgn0260860,FBgn0033988,FBgn0025574,FBgn0025802,FBgn0037655,FBgn0037766,FBgn0262562,FBgn0031769,FBgn0030087,FBgn0032020,FBgn0028509,FBg…
GO:0007126	meiotic nuclear division	biological_process	2.9371e-07	4.4201e-06	87	3767	178	12231	FBgn0261954,FBgn0037751,FBgn0004581,FBgn0011217,FBgn0026430,FBgn0026206,FBgn0011205,FBgn0035762,FBgn0261618,FBgn0267378,FBgn0002542,FBgn0003732,FBgn0261385,FBgn0004367,FBgn0004106,FBgn0011659,FBgn0053094,FBgn0262526,FBgn0264291,FBgn0002873,FBgn0260985,FBgn0004655,FBgn0002924,FBgn0002901,FBgn0264694,FBgn0010314,FBgn0261239,FBgn0027948,FBgn0011606,FBgn0014857,FBgn0011826,FBgn0262468,FBgn0004373,FBg…
GO:0023061	signal release	biological_process	2.9419e-07	4.4205e-06	69	3767	133	12231	FBgn0267002,FBgn0037015,FBgn0086372,FBgn0030505,FBgn0038065,FBgn0031455,FBgn0000183,FBgn0261617,FBgn0024814,FBgn0266719,FBgn0010380,FBgn0053094,FBgn0026378,FBgn0266669,FBgn0035060,FBgn0004242,FBgn0038984,FBgn0034691,FBgn0266757,FBgn0027356,FBgn0039900,FBgn0023091,FBgn0264606,FBgn0027505,FBgn0261279,FBgn0016975,FBgn0261086,FBgn0010348,FBgn0002121,FBgn0013997,FBgn0039132,FBgn0013762,FBgn0004868,FBg…
GO:0030055	cell-substrate junction	cellular_component	2.956e-07	4.4349e-06	23	3767	30	12231	FBgn0000017,FBgn0000667,FBgn0010215,FBgn0267698,FBgn0259745,FBgn0004397,FBgn0259212,FBgn0033987,FBgn0020440,FBgn0034540,FBgn0000464,FBgn0028427,FBgn0033504,FBgn0265991,FBgn0010415,FBgn0000244,FBgn0031850,FBgn0035539,FBgn0011642,FBgn0035101,FBgn0004657,FBgn0032731,FBgn0046704
GO:0008047	enzyme activator activity	molecular_function	3.2488e-07	4.8668e-06	39	3767	63	12231	FBgn0041707,FBgn0262125,FBgn0003041,FBgn0035227,FBgn0032961,FBgn0004390,FBgn0033886,FBgn0261570,FBgn0020278,FBgn0023517,FBgn0028509,FBgn0003969,FBgn0038855,FBgn0261823,FBgn0005198,FBgn0025836,FBgn0086356,FBgn0000239,FBgn0261109,FBgn0262738,FBgn0263864,FBgn0027509,FBgn0026597,FBgn0028743,FBgn0264895,FBgn0011573,FBgn0086677,FBgn0085437,FBgn0024941,FBgn0028496,FBgn0024314,FBgn0265597,FBgn0000206,FBg…
GO:0044449	contractile fiber part	cellular_component	3.3952e-07	5.0783e-06	31	3767	46	12231	FBgn0001091,FBgn0035917,FBgn0025391,FBgn0035499,FBgn0261836,FBgn0004169,FBgn0264695,FBgn0000667,FBgn0002773,FBgn0086442,FBgn0004028,FBgn0036641,FBgn0005666,FBgn0041096,FBgn0265356,FBgn0250906,FBgn0004117,FBgn0004657,FBgn0053519,FBgn0002772,FBgn0003149,FBgn0034072,FBgn0026059,FBgn0265434,FBgn0014863,FBgn0086906,FBgn0000064,FBgn0265991,FBgn0038294,FBgn0027052,FBgn0019947
GO:0070848	response to growth factor	biological_process	3.4874e-07	5.2082e-06	43	3767	72	12231	FBgn0000395,FBgn0003169,FBgn0031450,FBgn0029006,FBgn0001332,FBgn0020299,FBgn0000382,FBgn0010341,FBgn0011648,FBgn0038755,FBgn0031016,FBgn0001079,FBgn0003317,FBgn0023423,FBgn0012051,FBgn0020493,FBgn0031745,FBgn0037015,FBgn0025800,FBgn0011300,FBgn0000490,FBgn0020251,FBgn0265048,FBgn0031461,FBgn0033438,FBgn0264922,FBgn0024277,FBgn0263593,FBgn0261524,FBgn0002121,FBgn0039914,FBgn0010389,FBgn0014388,FBg…
GO:0060589	nucleoside-triphosphatase regulator activity	molecular_function	3.6919e-07	5.5052e-06	29	3767	42	12231	FBgn0028509,FBgn0003969,FBgn0020278,FBgn0025836,FBgn0005198,FBgn0086356,FBgn0038855,FBgn0265597,FBgn0262125,FBgn0024941,FBgn0085437,FBgn0032961,FBgn0004390,FBgn0261570,FBgn0003041,FBgn0035227,FBgn0015269,FBgn0026597,FBgn0028743,FBgn0032821,FBgn0027509,FBgn0031233,FBgn0264895,FBgn0040080,FBgn0004868,FBgn0038747,FBgn0261109,FBgn0032249,FBgn0262738
GO:0070646	protein modification by small protein removal	biological_process	4.4914e-07	6.6871e-06	36	3767	57	12231	FBgn0028837,FBgn0027055,FBgn0016756,FBgn0013717,FBgn0005632,FBgn0261437,FBgn0026738,FBgn0011327,FBgn0029763,FBgn0003023,FBgn0052479,FBgn0027057,FBgn0037734,FBgn0262166,FBgn0031208,FBgn0000239,FBgn0036180,FBgn0031187,FBgn0039214,FBgn0260936,FBgn0029819,FBgn0038862,FBgn0035593,FBgn0029853,FBgn0033916,FBgn0264922,FBgn0030366,FBgn0035402,FBgn0050421,FBgn0027054,FBgn0032214,FBgn0033738,FBgn0028476,FBg…
GO:0007613	memory	biological_process	4.7185e-07	7.0146e-06	54	3767	98	12231	FBgn0261934,FBgn0019948,FBgn0028734,FBgn0023479,FBgn0061469,FBgn0000119,FBgn0000479,FBgn0016917,FBgn0043903,FBgn0023023,FBgn0001208,FBgn0004864,FBgn0259246,FBgn0036819,FBgn0041184,FBgn0266579,FBgn0002932,FBgn0261788,FBgn0000546,FBgn0262733,FBgn0053513,FBgn0017590,FBgn0003165,FBgn0040372,FBgn0003996,FBgn0000422,FBgn0003392,FBgn0041188,FBgn0003513,FBgn0000273,FBgn0265597,FBgn0027106,FBgn0264607,FBg…
GO:2000027	regulation of organ morphogenesis	biological_process	4.8332e-07	7.1741e-06	51	3767	91	12231	FBgn0015589,FBgn0003169,FBgn0002932,FBgn0013469,FBgn0260635,FBgn0039234,FBgn0003513,FBgn0266450,FBgn0264075,FBgn0004837,FBgn0004009,FBgn0000382,FBgn0262866,FBgn0030395,FBgn0024836,FBgn0000097,FBgn0037671,FBgn0011217,FBgn0011648,FBgn0004638,FBgn0015371,FBgn0025800,FBgn0014863,FBgn0003410,FBgn0004390,FBgn0000490,FBgn0005536,FBgn0019972,FBgn0250823,FBgn0025743,FBgn0000499,FBgn0026181,FBgn0032929,FBg…
GO:0003777	microtubule motor activity	molecular_function	5.0088e-07	7.4235e-06	35	3767	55	12231	FBgn0004387,FBgn0013810,FBgn0039925,FBgn0023096,FBgn0010235,FBgn0000352,FBgn0013811,FBgn0263076,FBgn0003654,FBgn0037254,FBgn0019968,FBgn0004380,FBgn0004381,FBgn0013813,FBgn0032243,FBgn0003545,FBgn0037726,FBgn0030276,FBgn0086362,FBgn0031955,FBgn0004374,FBgn0035581,FBgn0004378,FBgn0001108,FBgn0267002,FBgn0004379,FBgn0003392,FBgn0011692,FBgn0013812,FBgn0267432,FBgn0040232,FBgn0011606,FBgn0030268,FBg…
GO:0007447	imaginal disc pattern formation	biological_process	5.2582e-07	7.7814e-06	56	3767	103	12231	FBgn0020493,FBgn0000099,FBgn0036814,FBgn0031005,FBgn0003053,FBgn0002735,FBgn0000179,FBgn0000083,FBgn0004889,FBgn0004635,FBgn0000577,FBgn0040388,FBgn0011648,FBgn0052133,FBgn0039380,FBgn0040071,FBgn0041111,FBgn0000014,FBgn0013718,FBgn0016977,FBgn0003317,FBgn0003984,FBgn0053554,FBgn0000273,FBgn0001235,FBgn0004009,FBgn0004837,FBgn0261885,FBgn0011758,FBgn0015589,FBgn0027548,FBgn0020238,FBgn0261963,FBg…
GO:0007626	locomotory behavior	biological_process	5.4362e-07	8.0326e-06	87	3767	180	12231	FBgn0041100,FBgn0259246,FBgn0262467,FBgn0030600,FBgn0043903,FBgn0010051,FBgn0011571,FBgn0004179,FBgn0028734,FBgn0003371,FBgn0263111,FBgn0086367,FBgn0039536,FBgn0000259,FBgn0003380,FBgn0004102,FBgn0036819,FBgn0026086,FBgn0000394,FBgn0261268,FBgn0053988,FBgn0001308,FBgn0051992,FBgn0000273,FBgn0002526,FBgn0263220,FBgn0027066,FBgn0033447,FBgn0026439,FBgn0259099,FBgn0264006,FBgn0004611,FBgn0013762,FBg…
GO:0005635	nuclear envelope	cellular_component	5.5226e-07	8.148e-06	53	3767	96	12231	FBgn0036994,FBgn0033316,FBgn0033737,FBgn0262647,FBgn0027868,FBgn0039120,FBgn0030276,FBgn0266580,FBgn0015600,FBgn0017581,FBgn0038274,FBgn0026207,FBgn0033247,FBgn0087013,FBgn0262743,FBgn0034657,FBgn0024921,FBgn0013756,FBgn0261014,FBgn0265003,FBgn0039348,FBgn0010660,FBgn0003165,FBgn0261836,FBgn0020497,FBgn0010350,FBgn0039125,FBgn0034310,FBgn0267727,FBgn0038536,FBgn0053180,FBgn0026326,FBgn0260399,FBg…
GO:0050790	regulation of catalytic activity	biological_process	5.6023e-07	8.2434e-06	98	3767	211	12231	FBgn0032725,FBgn0031973,FBgn0030915,FBgn0038980,FBgn0061476,FBgn0000239,FBgn0040038,FBgn0010909,FBgn0037816,FBgn0026326,FBgn0250910,FBgn0026323,FBgn0028546,FBgn0263864,FBgn0023178,FBgn0261786,FBgn0003884,FBgn0016081,FBgn0044324,FBgn0036237,FBgn0086657,FBgn0041707,FBgn0027505,FBgn0265137,FBgn0002121,FBgn0010316,FBgn0040505,FBgn0035640,FBgn0011217,FBgn0020224,FBgn0259216,FBgn0004638,FBgn0026192,FBg…
GO:0045168	cell-cell signaling involved in cell fate commitment	biological_process	5.6042e-07	8.2434e-06	98	3767	211	12231	FBgn0028426,FBgn0030871,FBgn0035194,FBgn0000479,FBgn0000547,FBgn0010488,FBgn0024188,FBgn0035577,FBgn0243514,FBgn0038744,FBgn0015789,FBgn0027054,FBgn0033438,FBgn0024179,FBgn0052676,FBgn0261811,FBgn0038536,FBgn0037741,FBgn0001139,FBgn0035023,FBgn0264089,FBgn0033901,FBgn0052732,FBgn0261873,FBgn0004197,FBgn0024510,FBgn0263997,FBgn0039403,FBgn0014007,FBgn0262516,FBgn0015524,FBgn0264492,FBgn0264291,FBg…
GO:0061695	transferase complex, transferring phosphorus-containing groups	cellular_component	5.9308e-07	8.7108e-06	67	3767	130	12231	FBgn0003169,FBgn0011836,FBgn0039636,FBgn0000404,FBgn0000273,FBgn0010356,FBgn0010280,FBgn0004406,FBgn0000405,FBgn0001179,FBgn0036570,FBgn0039459,FBgn0034726,FBgn0040020,FBgn0026679,FBgn0024909,FBgn0259113,FBgn0019949,FBgn0010750,FBgn0263237,FBgn0262117,FBgn0026373,FBgn0011571,FBgn0022724,FBgn0030087,FBgn0003277,FBgn0011291,FBgn0025455,FBgn0261850,FBgn0032634,FBgn0026441,FBgn0010417,FBgn0034964,FBg…
GO:0060627	regulation of vesicle-mediated transport	biological_process	5.9594e-07	8.7396e-06	43	3767	73	12231	FBgn0015772,FBgn0010300,FBgn0000319,FBgn0261983,FBgn0263289,FBgn0265174,FBgn0259174,FBgn0002973,FBgn0053558,FBgn0030505,FBgn0086372,FBgn0000257,FBgn0000482,FBgn0029818,FBgn0032052,FBgn0030329,FBgn0259173,FBgn0031030,FBgn0000183,FBgn0261064,FBgn0086784,FBgn0032499,FBgn0010348,FBgn0016975,FBgn0002566,FBgn0052654,FBgn0266671,FBgn0024833,FBgn0039335,FBgn0262125,FBgn0250823,FBgn0036740,FBgn0262527,FBg…
GO:0009953	dorsal/ventral pattern formation	biological_process	6.2127e-07	9.0973e-06	75	3767	150	12231	FBgn0000711,FBgn0000259,FBgn0261458,FBgn0003731,FBgn0003415,FBgn0003118,FBgn0260632,FBgn0263929,FBgn0265297,FBgn0263930,FBgn0016034,FBgn0037021,FBgn0261479,FBgn0001169,FBgn0000490,FBgn0028734,FBgn0263396,FBgn0019947,FBgn0003495,FBgn0000119,FBgn0027053,FBgn0003483,FBgn0004396,FBgn0015754,FBgn0041111,FBgn0013718,FBgn0040071,FBgn0003317,FBgn0003053,FBgn0002735,FBgn0031114,FBgn0000099,FBgn0000083,FBg…
GO:0003723	RNA binding	molecular_function	6.3152e-07	9.2336e-06	176	3767	425	12231	FBgn0250816,FBgn0004401,FBgn0026259,FBgn0259199,FBgn0265297,FBgn0032515,FBgn0010926,FBgn0034967,FBgn0011571,FBgn0003638,FBgn0024183,FBgn0035024,FBgn0031318,FBgn0028982,FBgn0027841,FBgn0002775,FBgn0037707,FBgn0033169,FBgn0264001,FBgn0024285,FBgn0263352,FBgn0011638,FBgn0037135,FBgn0003575,FBgn0086675,FBgn0023519,FBgn0024542,FBgn0003165,FBgn0039566,FBgn0027548,FBgn0033688,FBgn0015298,FBgn0014870,FBg…
GO:0098793	presynapse	cellular_component	6.5906e-07	9.6219e-06	49	3767	87	12231	FBgn0036376,FBgn0036819,FBgn0036141,FBgn0266757,FBgn0261722,FBgn0003210,FBgn0035060,FBgn0263111,FBgn0004242,FBgn0266756,FBgn0026378,FBgn0024833,FBgn0004179,FBgn0039132,FBgn0031424,FBgn0030816,FBgn0264855,FBgn0053653,FBgn0053547,FBgn0016975,FBgn0002121,FBgn0027505,FBgn0264606,FBgn0005586,FBgn0039900,FBgn0259246,FBgn0030613,FBgn0260964,FBgn0259824,FBgn0015806,FBgn0262518,FBgn0031455,FBgn0004868,FBg…
GO:0071013	catalytic step 2 spliceosome	cellular_component	6.8028e-07	9.9169e-06	64	3767	123	12231	FBgn0030365,FBgn0003261,FBgn0033062,FBgn0030625,FBgn0027617,FBgn0086444,FBgn0037573,FBgn0086895,FBgn0024998,FBgn0023506,FBgn0028919,FBgn0037466,FBgn0263599,FBgn0033160,FBgn0030915,FBgn0022959,FBgn0036207,FBgn0050342,FBgn0036277,FBgn0263198,FBgn0033210,FBgn0266917,FBgn0262735,FBgn0010774,FBgn0261641,FBgn0032248,FBgn0037220,FBgn0261933,FBgn0261068,FBgn0031114,FBgn0031493,FBgn0035162,FBgn0024285,FBg…
GO:0098805	whole membrane	cellular_component	6.8136e-07	9.9179e-06	145	3767	339	12231	FBgn0004363,FBgn0086372,FBgn0039911,FBgn0031879,FBgn0000384,FBgn0026192,FBgn0037100,FBgn0000183,FBgn0027579,FBgn0032151,FBgn0004108,FBgn0262516,FBgn0036484,FBgn0004657,FBgn0034577,FBgn0000206,FBgn0029870,FBgn0010380,FBgn0053094,FBgn0261788,FBgn0036928,FBgn0016041,FBgn0037594,FBgn0010434,FBgn0027779,FBgn0026388,FBgn0034261,FBgn0019985,FBgn0035850,FBgn0086901,FBgn0002121,FBgn0005322,FBgn0025725,FBg…
GO:0071363	cellular response to growth factor stimulus	biological_process	6.86e-07	9.9705e-06	42	3767	71	12231	FBgn0037015,FBgn0025800,FBgn0031745,FBgn0012051,FBgn0020493,FBgn0001079,FBgn0023423,FBgn0003317,FBgn0038755,FBgn0031016,FBgn0011648,FBgn0000382,FBgn0010341,FBgn0001332,FBgn0020299,FBgn0029006,FBgn0031450,FBgn0003169,FBgn0000395,FBgn0263930,FBgn0024234,FBgn0027363,FBgn0085450,FBgn0004644,FBgn0029067,FBgn0034265,FBgn0015754,FBgn0030600,FBgn0262169,FBgn0014388,FBgn0002121,FBgn0039914,FBgn0010389,FBg…
GO:0006469	negative regulation of protein kinase activity	biological_process	7.4115e-07	1.074e-05	22	3767	29	12231	FBgn0001086,FBgn0002121,FBgn0027053,FBgn0031044,FBgn0011737,FBgn0010314,FBgn0040206,FBgn0261786,FBgn0041171,FBgn0012058,FBgn0264848,FBgn0020440,FBgn0026192,FBgn0004638,FBgn0003371,FBgn0000351,FBgn0036844,FBgn0028546,FBgn0020224,FBgn0015399,FBgn0011217,FBgn0262699
GO:0033673	negative regulation of kinase activity	biological_process	7.4115e-07	1.074e-05	22	3767	29	12231	FBgn0011217,FBgn0015399,FBgn0020224,FBgn0262699,FBgn0000351,FBgn0036844,FBgn0003371,FBgn0004638,FBgn0026192,FBgn0020440,FBgn0028546,FBgn0041171,FBgn0261786,FBgn0012058,FBgn0264848,FBgn0031044,FBgn0027053,FBgn0001086,FBgn0002121,FBgn0040206,FBgn0010314,FBgn0011737
GO:0005924	cell-substrate adherens junction	cellular_component	7.4279e-07	1.0748e-05	22	3767	29	12231	FBgn0011642,FBgn0004657,FBgn0035101,FBgn0046704,FBgn0032731,FBgn0028427,FBgn0033504,FBgn0265991,FBgn0031850,FBgn0035539,FBgn0010415,FBgn0000244,FBgn0034540,FBgn0033987,FBgn0020440,FBgn0000464,FBgn0000667,FBgn0000017,FBgn0267698,FBgn0259745,FBgn0259212,FBgn0004397
GO:0030016	myofibril	cellular_component	7.5272e-07	1.0876e-05	30	3767	45	12231	FBgn0086906,FBgn0014863,FBgn0265434,FBgn0019947,FBgn0027052,FBgn0038294,FBgn0000064,FBgn0265991,FBgn0053519,FBgn0004657,FBgn0004117,FBgn0250906,FBgn0265356,FBgn0026059,FBgn0003149,FBgn0034072,FBgn0002773,FBgn0000667,FBgn0264695,FBgn0041096,FBgn0005666,FBgn0036641,FBgn0004028,FBgn0086442,FBgn0035917,FBgn0001091,FBgn0004169,FBgn0261836,FBgn0035499,FBgn0025391
GO:0006401	RNA catabolic process	biological_process	7.5499e-07	1.0892e-05	30	3767	45	12231	FBgn0263968,FBgn0003165,FBgn0033029,FBgn0016070,FBgn0011207,FBgn0010406,FBgn0003575,FBgn0005648,FBgn0263396,FBgn0033352,FBgn0033376,FBgn0032296,FBgn0026722,FBgn0034921,FBgn0262739,FBgn0038269,FBgn0003483,FBgn0017550,FBgn0051992,FBgn0085436,FBgn0020261,FBgn0260444,FBgn0037707,FBgn0039260,FBgn0250816,FBgn0031047,FBgn0266053,FBgn0036239,FBgn0019890,FBgn0261984
GO:0007051	spindle organization	biological_process	7.7421e-07	1.1153e-05	114	3767	255	12231	FBgn0004436,FBgn0005593,FBgn0026370,FBgn0003371,FBgn0020255,FBgn0005655,FBgn0039731,FBgn0029897,FBgn0015625,FBgn0261787,FBgn0259876,FBgn0262714,FBgn0014366,FBgn0015754,FBgn0037249,FBgn0003545,FBgn0011207,FBgn0086134,FBgn0011202,FBgn0003654,FBgn0260991,FBgn0015282,FBgn0036059,FBgn0264922,FBgn0031452,FBgn0263197,FBgn0004379,FBgn0004378,FBgn0001108,FBgn0037632,FBgn0011661,FBgn0032444,FBgn0029969,FBg…
GO:0006338	chromatin remodeling	biological_process	7.8502e-07	1.1292e-05	41	3767	69	12231	FBgn0265193,FBgn0004924,FBgn0024329,FBgn0005596,FBgn0005624,FBgn0040022,FBgn0031876,FBgn0000139,FBgn0011604,FBgn0000212,FBgn0028734,FBgn0011764,FBgn0025463,FBgn0034537,FBgn0030877,FBgn0000541,FBgn0262519,FBgn0027835,FBgn0061200,FBgn0030891,FBgn0026160,FBgn0250786,FBgn0040066,FBgn0032321,FBgn0030093,FBgn0030082,FBgn0013756,FBgn0086359,FBgn0027490,FBgn0011715,FBgn0028926,FBgn0086916,FBgn0033636,FBg…
GO:0051299	centrosome separation	biological_process	8.0663e-07	1.1586e-05	17	3767	20	12231	FBgn0036480,FBgn0086359,FBgn0011020,FBgn0002924,FBgn0001308,FBgn0261278,FBgn0015754,FBgn0011737,FBgn0000147,FBgn0021760,FBgn0267351,FBgn0004379,FBgn0261618,FBgn0004436,FBgn0260399,FBgn0001108,FBgn0004378
GO:0030010	establishment of cell polarity	biological_process	8.3653e-07	1.1998e-05	28	3767	41	12231	FBgn0265434,FBgn0019968,FBgn0002873,FBgn0034451,FBgn0001075,FBgn0002121,FBgn0000499,FBgn0267350,FBgn0001624,FBgn0027655,FBgn0263289,FBgn0010341,FBgn0034072,FBgn0011661,FBgn0264272,FBgn0259685,FBgn0260003,FBgn0000147,FBgn0259212,FBgn0261854,FBgn0015331,FBgn0026192,FBgn0040080,FBgn0003371,FBgn0000163,FBgn0004177,FBgn0020255,FBgn0001108
GO:0044822	poly(A) RNA binding	molecular_function	8.5064e-07	1.2182e-05	93	3767	197	12231	FBgn0051716,FBgn0052423,FBgn0003742,FBgn0259139,FBgn0004838,FBgn0030959,FBgn0016070,FBgn0262526,FBgn0014340,FBgn0003732,FBgn0004237,FBgn0000562,FBgn0003520,FBgn0003261,FBgn0085383,FBgn0030631,FBgn0004882,FBgn0035526,FBgn0027617,FBgn0021895,FBgn0263995,FBgn0039229,FBgn0036018,FBgn0087039,FBgn0262735,FBgn0033210,FBgn0010774,FBgn0000504,FBgn0011305,FBgn0267791,FBgn0011666,FBgn0038872,FBgn0002044,FBg…
GO:0045185	maintenance of protein location	biological_process	8.6451e-07	1.2363e-05	27	3767	39	12231	FBgn0260934,FBgn0043884,FBgn0034072,FBgn0086356,FBgn0023216,FBgn0035101,FBgn0026181,FBgn0000250,FBgn0000244,FBgn0011747,FBgn0000042,FBgn0011692,FBgn0028427,FBgn0265434,FBgn0011202,FBgn0261788,FBgn0003041,FBgn0025391,FBgn0001250,FBgn0040080,FBgn0003090,FBgn0000352,FBgn0020440,FBgn0004397,FBgn0023423,FBgn0000667,FBgn0010215
GO:0061024	membrane organization	biological_process	8.6845e-07	1.2401e-05	86	3767	179	12231	FBgn0004167,FBgn0086372,FBgn0033460,FBgn0261385,FBgn0243511,FBgn0010747,FBgn0011205,FBgn0032052,FBgn0029818,FBgn0003254,FBgn0000482,FBgn0027579,FBgn0024814,FBgn0033483,FBgn0000382,FBgn0267350,FBgn0026630,FBgn0003392,FBgn0261014,FBgn0024811,FBgn0029870,FBgn0044871,FBgn0265174,FBgn0000546,FBgn0086916,FBgn0026479,FBgn0010660,FBgn0010380,FBgn0053094,FBgn0035533,FBgn0261276,FBgn0003210,FBgn0004242,FBg…
GO:0000082	G1/S transition of mitotic cell cycle	biological_process	8.71e-07	1.2401e-05	25	3767	35	12231	FBgn0029504,FBgn0001965,FBgn0015799,FBgn0004106,FBgn0000212,FBgn0035194,FBgn0011739,FBgn0039403,FBgn0011766,FBgn0026143,FBgn0041191,FBgn0010316,FBgn0003139,FBgn0004837,FBgn0024371,FBgn0023213,FBgn0011648,FBgn0034646,FBgn0029133,FBgn0002783,FBgn0004859,FBgn0031885,FBgn0010382,FBgn0003731,FBgn0039858
GO:0044843	cell cycle G1/S phase transition	biological_process	8.71e-07	1.2401e-05	25	3767	35	12231	FBgn0000212,FBgn0015799,FBgn0029504,FBgn0001965,FBgn0004106,FBgn0041191,FBgn0003139,FBgn0010316,FBgn0026143,FBgn0024371,FBgn0004837,FBgn0035194,FBgn0011766,FBgn0011739,FBgn0039403,FBgn0004859,FBgn0029133,FBgn0002783,FBgn0031885,FBgn0011648,FBgn0023213,FBgn0034646,FBgn0039858,FBgn0003731,FBgn0010382
GO:0007605	sensory perception of sound	biological_process	9.392e-07	1.3353e-05	35	3767	56	12231	FBgn0034745,FBgn0010433,FBgn0013810,FBgn0023096,FBgn0016047,FBgn0260005,FBgn0016920,FBgn0036757,FBgn0261549,FBgn0037726,FBgn0003950,FBgn0011202,FBgn0032010,FBgn0033504,FBgn0004380,FBgn0034566,FBgn0000121,FBgn0014395,FBgn0036414,FBgn0005614,FBgn0036199,FBgn0266709,FBgn0262111,FBgn0261648,FBgn0000317,FBgn0002921,FBgn0261788,FBgn0013812,FBgn0039232,FBgn0004618,FBgn0086690,FBgn0259099,FBgn0000253,FBg…
GO:0016049	cell growth	biological_process	9.5673e-07	1.3582e-05	62	3767	119	12231	FBgn0023169,FBgn0037015,FBgn0015269,FBgn0000464,FBgn0003416,FBgn0021796,FBgn0004360,FBgn0041781,FBgn0020493,FBgn0038100,FBgn0015806,FBgn0000535,FBgn0026317,FBgn0034012,FBgn0011771,FBgn0086706,FBgn0039532,FBgn0046704,FBgn0004009,FBgn0265194,FBgn0011787,FBgn0261560,FBgn0016797,FBgn0262582,FBgn0015218,FBgn0035590,FBgn0020510,FBgn0010303,FBgn0261788,FBgn0259176,FBgn0261985,FBgn0038197,FBgn0000996,FBg…
GO:0003779	actin binding	molecular_function	9.9022e-07	1.4037e-05	64	3767	124	12231	FBgn0031781,FBgn0000244,FBgn0011202,FBgn0014133,FBgn0028371,FBgn0031050,FBgn0026059,FBgn0040299,FBgn0010246,FBgn0265082,FBgn0002789,FBgn0259212,FBgn0010215,FBgn0266696,FBgn0033244,FBgn0264272,FBgn0261458,FBgn0261836,FBgn0038774,FBgn0020503,FBgn0011745,FBgn0003187,FBgn0267795,FBgn0036333,FBgn0000317,FBgn0004117,FBgn0000709,FBgn0029903,FBgn0004028,FBgn0000667,FBgn0011661,FBgn0024238,FBgn0260003,FBg…
GO:0007420	brain development	biological_process	1.0184e-06	1.4416e-05	66	3767	129	12231	FBgn0010300,FBgn0264075,FBgn0003720,FBgn0000635,FBgn0040283,FBgn0004009,FBgn0002526,FBgn0004878,FBgn0003656,FBgn0025800,FBgn0000543,FBgn0000577,FBgn0024836,FBgn0031030,FBgn0025743,FBgn0003969,FBgn0010051,FBgn0015754,FBgn0086680,FBgn0004179,FBgn0031500,FBgn0028734,FBgn0026722,FBgn0024277,FBgn0003731,FBgn0045063,FBgn0010433,FBgn0264598,FBgn0000259,FBgn0004102,FBgn0086359,FBgn0003984,FBgn0016797,FBg…
GO:0006403	RNA localization	biological_process	1.0339e-06	1.4614e-05	70	3767	139	12231	FBgn0038950,FBgn0034939,FBgn0001233,FBgn0001308,FBgn0000273,FBgn0000319,FBgn0000615,FBgn0260934,FBgn0087035,FBgn0027868,FBgn0035110,FBgn0005411,FBgn0261064,FBgn0004510,FBgn0002938,FBgn0001108,FBgn0030136,FBgn0262736,FBgn0028734,FBgn0263396,FBgn0032340,FBgn0022942,FBgn0034921,FBgn0003483,FBgn0038135,FBgn0015754,FBgn0000259,FBgn0000115,FBgn0263929,FBgn0031390,FBgn0016034,FBgn0034310,FBgn0264492,FBg…
GO:0043069	negative regulation of programmed cell death	biological_process	1.0438e-06	1.4732e-05	46	3767	81	12231	FBgn0015509,FBgn0031491,FBgn0243511,FBgn0037481,FBgn0031851,FBgn0023423,FBgn0002573,FBgn0028484,FBgn0002622,FBgn0259108,FBgn0032006,FBgn0086706,FBgn0000382,FBgn0004009,FBgn0003984,FBgn0045035,FBgn0001332,FBgn0004170,FBgn0260635,FBgn0042693,FBgn0259176,FBgn0014340,FBgn0015589,FBgn0015799,FBgn0264291,FBgn0034763,FBgn0003079,FBgn0003731,FBgn0004436,FBgn0003118,FBgn0051216,FBgn0052418,FBgn0261456,FBg…
GO:0035186	syncytial blastoderm mitotic cell cycle	biological_process	1.1196e-06	1.5779e-05	18	3767	22	12231	FBgn0003042,FBgn0033081,FBgn0000404,FBgn0264922,FBgn0010314,FBgn0000405,FBgn0005624,FBgn0261278,FBgn0026371,FBgn0261823,FBgn0011020,FBgn0002901,FBgn0000629,FBgn0015600,FBgn0013263,FBgn0015625,FBgn0004367,FBgn0261618
GO:0043066	negative regulation of apoptotic process	biological_process	1.1538e-06	1.6238e-05	42	3767	72	12231	FBgn0002573,FBgn0023423,FBgn0037481,FBgn0243511,FBgn0031491,FBgn0015509,FBgn0034763,FBgn0264291,FBgn0015799,FBgn0003079,FBgn0014340,FBgn0259176,FBgn0042693,FBgn0004170,FBgn0260635,FBgn0003984,FBgn0045035,FBgn0004009,FBgn0000382,FBgn0259108,FBgn0032006,FBgn0086706,FBgn0002622,FBgn0028484,FBgn0025825,FBgn0001977,FBgn0261456,FBgn0052418,FBgn0051216,FBgn0003118,FBgn0003731,FBgn0004436,FBgn0266717,FBg…
GO:0033157	regulation of intracellular protein transport	biological_process	1.161e-06	1.6316e-05	33	3767	52	12231	FBgn0262743,FBgn0024921,FBgn0262866,FBgn0045073,FBgn0010660,FBgn0011692,FBgn0041585,FBgn0000250,FBgn0265174,FBgn0000253,FBgn0033260,FBgn0261385,FBgn0259685,FBgn0041582,FBgn0032052,FBgn0029818,FBgn0026207,FBgn0023423,FBgn0001079,FBgn0029709,FBgn0010379,FBgn0052654,FBgn0086358,FBgn0014366,FBgn0003371,FBgn0000352,FBgn0022213,FBgn0036141,FBgn0000115,FBgn0000017,FBgn0264493,FBgn0004644,FBgn0027338
GO:0000981	RNA polymerase II transcription factor activity, sequence-specific DNA binding	molecular_function	1.1659e-06	1.6362e-05	86	3767	180	12231	FBgn0040318,FBgn0000546,FBgn0002914,FBgn0004618,FBgn0003028,FBgn0011763,FBgn0004897,FBgn0029123,FBgn0004170,FBgn0003687,FBgn0004606,FBgn0261239,FBgn0001235,FBgn0000568,FBgn0004862,FBgn0028926,FBgn0019650,FBgn0000014,FBgn0022740,FBgn0011648,FBgn0034012,FBgn0000097,FBgn0002573,FBgn0015240,FBgn0023489,FBgn0028789,FBgn0014018,FBgn0015919,FBgn0004914,FBgn0265193,FBgn0000448,FBgn0000567,FBgn0016917,FBg…
GO:0007178	transmembrane receptor protein serine/threonine kinase signaling pathway	biological_process	1.2217e-06	1.712e-05	45	3767	79	12231	FBgn0262647,FBgn0012051,FBgn0020493,FBgn0025800,FBgn0037015,FBgn0011648,FBgn0038755,FBgn0031016,FBgn0027868,FBgn0001079,FBgn0003317,FBgn0039120,FBgn0023423,FBgn0010341,FBgn0000395,FBgn0010660,FBgn0003169,FBgn0259176,FBgn0029006,FBgn0024234,FBgn0034310,FBgn0263930,FBgn0038197,FBgn0027535,FBgn0061200,FBgn0033264,FBgn0034265,FBgn0029067,FBgn0024509,FBgn0085450,FBgn0263593,FBgn0261524,FBgn0002121,FBg…
GO:0009306	protein secretion	biological_process	1.2784e-06	1.7889e-05	32	3767	50	12231	FBgn0263390,FBgn0030503,FBgn0038984,FBgn0036141,FBgn0030341,FBgn0086674,FBgn0029709,FBgn0039450,FBgn0031779,FBgn0031842,FBgn0011202,FBgn0031461,FBgn0011708,FBgn0027575,FBgn0030365,FBgn0038747,FBgn0038065,FBgn0035965,FBgn0267002,FBgn0004378,FBgn0037015,FBgn0028969,FBgn0035770,FBgn0027497,FBgn0259824,FBgn0264560,FBgn0265998,FBgn0260744,FBgn0050404,FBgn0031312,FBgn0033902,FBgn0028968
GO:0033044	regulation of chromosome organization	biological_process	1.3064e-06	1.8253e-05	53	3767	98	12231	FBgn0036964,FBgn0260749,FBgn0027339,FBgn0265193,FBgn0039227,FBgn0035640,FBgn0024329,FBgn0025463,FBgn0044324,FBgn0031549,FBgn0003884,FBgn0264848,FBgn0003371,FBgn0262519,FBgn0034722,FBgn0261573,FBgn0022361,FBgn0026326,FBgn0263102,FBgn0011474,FBgn0002183,FBgn0023518,FBgn0030891,FBgn0263667,FBgn0260936,FBgn0003567,FBgn0030082,FBgn0061476,FBgn0013263,FBgn0037607,FBgn0000063,FBgn0023216,FBgn0086359,FBg…
GO:1902532	negative regulation of intracellular signal transduction	biological_process	1.3373e-06	1.8659e-05	41	3767	70	12231	FBgn0036740,FBgn0004390,FBgn0261570,FBgn0000547,FBgn0014388,FBgn0003969,FBgn0035850,FBgn0086901,FBgn0025740,FBgn0005198,FBgn0041100,FBgn0031885,FBgn0031799,FBgn0000711,FBgn0028546,FBgn0259785,FBgn0003371,FBgn0010909,FBgn0003612,FBgn0041184,FBgn0020440,FBgn0000541,FBgn0013469,FBgn0036846,FBgn0262866,FBgn0031044,FBgn0034577,FBgn0001332,FBgn0020279,FBgn0017581,FBgn0021760,FBgn0036373,FBgn0023423,FBg…
GO:0019783	ubiquitin-like protein-specific protease activity	molecular_function	1.3995e-06	1.9499e-05	31	3767	48	12231	FBgn0029853,FBgn0261437,FBgn0026738,FBgn0011327,FBgn0029763,FBgn0003023,FBgn0029819,FBgn0038862,FBgn0035593,FBgn0005632,FBgn0260936,FBgn0016756,FBgn0013717,FBgn0086346,FBgn0036180,FBgn0039214,FBgn0031187,FBgn0027053,FBgn0031208,FBgn0035713,FBgn0262166,FBgn0032214,FBgn0028476,FBgn0033738,FBgn0030366,FBgn0052479,FBgn0035402,FBgn0050421,FBgn0027054,FBgn0037734,FBgn0033916
GO:0009894	regulation of catabolic process	biological_process	1.4457e-06	2.0114e-05	66	3767	130	12231	FBgn0036892,FBgn0052707,FBgn0010382,FBgn0003268,FBgn0000546,FBgn0261014,FBgn0015024,FBgn0086359,FBgn0002567,FBgn0261108,FBgn0010314,FBgn0013269,FBgn0061476,FBgn0026326,FBgn0026323,FBgn0038197,FBgn0086687,FBgn0027054,FBgn0011300,FBgn0266717,FBgn0003884,FBgn0034476,FBgn0044324,FBgn0031549,FBgn0032499,FBgn0263198,FBgn0039114,FBgn0003256,FBgn0041191,FBgn0035640,FBgn0015279,FBgn0035850,FBgn0259685,FBg…
GO:0046331	lateral inhibition	biological_process	1.5129e-06	2.1019e-05	96	3767	208	12231	FBgn0024188,FBgn0010488,FBgn0000547,FBgn0243514,FBgn0035577,FBgn0035194,FBgn0000479,FBgn0030871,FBgn0028426,FBgn0033438,FBgn0024179,FBgn0038744,FBgn0027054,FBgn0015789,FBgn0001139,FBgn0261811,FBgn0052676,FBgn0038536,FBgn0037741,FBgn0004197,FBgn0024510,FBgn0261873,FBgn0263997,FBgn0035023,FBgn0052732,FBgn0264089,FBgn0033901,FBgn0262516,FBgn0014007,FBgn0039403,FBgn0010772,FBgn0000253,FBgn0039234,FBg…
GO:0051965	positive regulation of synapse assembly	biological_process	1.6618e-06	2.3055e-05	20	3767	26	12231	FBgn0038063,FBgn0036257,FBgn0001624,FBgn0011817,FBgn0010415,FBgn0259174,FBgn0037884,FBgn0024277,FBgn0024179,FBgn0053094,FBgn0011571,FBgn0261788,FBgn0044826,FBgn0263111,FBgn0024234,FBgn0038747,FBgn0003317,FBgn0267698,FBgn0011648,FBgn0034265
GO:0022416	chaeta development	biological_process	1.6785e-06	2.3254e-05	54	3767	101	12231	FBgn0260462,FBgn0001324,FBgn0000499,FBgn0011666,FBgn0034083,FBgn0262160,FBgn0037298,FBgn0005636,FBgn0000137,FBgn0016081,FBgn0086657,FBgn0028387,FBgn0263929,FBgn0003371,FBgn0003415,FBgn0263930,FBgn0261458,FBgn0031149,FBgn0003447,FBgn0005278,FBgn0261285,FBgn0014906,FBgn0040208,FBgn0016797,FBgn0000317,FBgn0041188,FBgn0004449,FBgn0265998,FBgn0003744,FBgn0045073,FBgn0263933,FBgn0264492,FBgn0036372,FBg…
GO:0005089	Rho guanyl-nucleotide exchange factor activity	molecular_function	1.8493e-06	2.5584e-05	21	3767	28	12231	FBgn0264707,FBgn0032796,FBgn0262562,FBgn0040068,FBgn0023172,FBgn0035574,FBgn0264598,FBgn0015513,FBgn0035761,FBgn0053519,FBgn0025836,FBgn0265082,FBgn0261556,FBgn0050440,FBgn0263706,FBgn0024277,FBgn0001965,FBgn0085447,FBgn0035802,FBgn0003041,FBgn0031216
GO:0098588	bounding membrane of organelle	cellular_component	1.8708e-06	2.5845e-05	114	3767	257	12231	FBgn0034649,FBgn0015324,FBgn0033460,FBgn0004363,FBgn0029818,FBgn0033088,FBgn0031676,FBgn0027579,FBgn0000183,FBgn0036932,FBgn0028327,FBgn0035464,FBgn0031422,FBgn0260940,FBgn0037050,FBgn0024814,FBgn0262516,FBgn0036484,FBgn0035483,FBgn0010380,FBgn0265174,FBgn0044871,FBgn0029870,FBgn0011297,FBgn0039140,FBgn0263598,FBgn0036928,FBgn0038515,FBgn0033901,FBgn0034261,FBgn0037242,FBgn0263782,FBgn0027779,FBg…
GO:0046822	regulation of nucleocytoplasmic transport	biological_process	1.8793e-06	2.5926e-05	27	3767	40	12231	FBgn0000253,FBgn0000250,FBgn0033260,FBgn0010660,FBgn0011692,FBgn0041585,FBgn0262866,FBgn0086358,FBgn0014366,FBgn0045073,FBgn0010379,FBgn0002044,FBgn0262743,FBgn0024921,FBgn0264493,FBgn0004644,FBgn0027338,FBgn0023423,FBgn0005411,FBgn0001079,FBgn0041582,FBgn0026207,FBgn0000017,FBgn0261385,FBgn0022213,FBgn0003371,FBgn0000352
GO:0016197	endosomal transport	biological_process	1.9096e-06	2.6306e-05	42	3767	73	12231	FBgn0052350,FBgn0039402,FBgn0000115,FBgn0004387,FBgn0263598,FBgn0027363,FBgn0004436,FBgn0250823,FBgn0039335,FBgn0036740,FBgn0086657,FBgn0001087,FBgn0034708,FBgn0024833,FBgn0014411,FBgn0266671,FBgn0035704,FBgn0038427,FBgn0052758,FBgn0010348,FBgn0031640,FBgn0261064,FBgn0000482,FBgn0021814,FBgn0037671,FBgn0000257,FBgn0025802,FBgn0000083,FBgn0031534,FBgn0004167,FBgn0011232,FBgn0001202,FBgn0021796,FBg…
GO:0071900	regulation of protein serine/threonine kinase activity	biological_process	1.9275e-06	2.6486e-05	34	3767	55	12231	FBgn0028546,FBgn0010433,FBgn0037816,FBgn0010909,FBgn0003371,FBgn0020440,FBgn0262699,FBgn0015625,FBgn0010316,FBgn0261524,FBgn0032378,FBgn0027053,FBgn0025743,FBgn0001086,FBgn0264922,FBgn0025455,FBgn0264848,FBgn0024326,FBgn0030018,FBgn0263237,FBgn0261786,FBgn0036844,FBgn0000351,FBgn0011217,FBgn0025674,FBgn0030613,FBgn0000405,FBgn0011737,FBgn0010314,FBgn0031044,FBgn0012058,FBgn0000404,FBgn0041171,FBg…
GO:0007224	smoothened signaling pathway	biological_process	1.9281e-06	2.6486e-05	34	3767	55	12231	FBgn0023423,FBgn0001079,FBgn0035853,FBgn0261697,FBgn0002174,FBgn0040388,FBgn0012051,FBgn0267378,FBgn0039709,FBgn0015024,FBgn0264492,FBgn0035719,FBgn0011692,FBgn0025638,FBgn0261617,FBgn0000273,FBgn0264493,FBgn0004859,FBgn0004644,FBgn0014343,FBgn0036974,FBgn0003390,FBgn0010575,FBgn0032725,FBgn0023518,FBgn0027535,FBgn0001139,FBgn0038862,FBgn0010433,FBgn0000352,FBgn0004177,FBgn0003371,FBgn0002044,FBg…
GO:1903827	regulation of cellular protein localization	biological_process	1.932e-06	2.6502e-05	34	3767	55	12231	FBgn0010379,FBgn0029709,FBgn0014366,FBgn0086358,FBgn0052654,FBgn0000017,FBgn0000115,FBgn0036141,FBgn0027338,FBgn0004644,FBgn0264493,FBgn0000352,FBgn0003371,FBgn0262519,FBgn0022213,FBgn0041585,FBgn0011692,FBgn0010660,FBgn0033260,FBgn0265174,FBgn0000253,FBgn0000250,FBgn0024921,FBgn0262743,FBgn0045073,FBgn0262866,FBgn0029818,FBgn0026207,FBgn0032052,FBgn0041582,FBgn0259685,FBgn0001079,FBgn0023423,FBg…
GO:0006605	protein targeting	biological_process	1.9481e-06	2.6669e-05	74	3767	151	12231	FBgn0014366,FBgn0035233,FBgn0086358,FBgn0024889,FBgn0000119,FBgn0037020,FBgn0027287,FBgn0264922,FBgn0034310,FBgn0003371,FBgn0267727,FBgn0027338,FBgn0264493,FBgn0000115,FBgn0086757,FBgn0033052,FBgn0013756,FBgn0086357,FBgn0262743,FBgn0032397,FBgn0087013,FBgn0015298,FBgn0263977,FBgn0033260,FBgn0000250,FBgn0011692,FBgn0010441,FBgn0033737,FBgn0033194,FBgn0266580,FBgn0027868,FBgn0000257,FBgn0041582,FBg…
GO:0031329	regulation of cellular catabolic process	biological_process	1.9496e-06	2.6669e-05	60	3767	116	12231	FBgn0026323,FBgn0026326,FBgn0003371,FBgn0086687,FBgn0038197,FBgn0034646,FBgn0013269,FBgn0000063,FBgn0250816,FBgn0061476,FBgn0003256,FBgn0003483,FBgn0039114,FBgn0263198,FBgn0027053,FBgn0005198,FBgn0032499,FBgn0260749,FBgn0035850,FBgn0035640,FBgn0015279,FBgn0034072,FBgn0041191,FBgn0266717,FBgn0261479,FBgn0011300,FBgn0027054,FBgn0052672,FBgn0264848,FBgn0044324,FBgn0031461,FBgn0031549,FBgn0061469,FBg…
GO:0045596	negative regulation of cell differentiation	biological_process	1.9609e-06	2.6787e-05	45	3767	80	12231	FBgn0028582,FBgn0041184,FBgn0003118,FBgn0000320,FBgn0010113,FBgn0003731,FBgn0262127,FBgn0004177,FBgn0262738,FBgn0261456,FBgn0003507,FBgn0000547,FBgn0014388,FBgn0011739,FBgn0002121,FBgn0000499,FBgn0027053,FBgn0028387,FBgn0034975,FBgn0000212,FBgn0028734,FBgn0266717,FBgn0014133,FBgn0003124,FBgn0004889,FBgn0003416,FBgn0037481,FBgn0000606,FBgn0031005,FBgn0015371,FBgn0023423,FBgn0002783,FBgn0000097,FBg…
GO:0072594	establishment of protein localization to organelle	biological_process	2.0212e-06	2.7571e-05	70	3767	141	12231	FBgn0266580,FBgn0027868,FBgn0000257,FBgn0041582,FBgn0033737,FBgn0033194,FBgn0263977,FBgn0033260,FBgn0000250,FBgn0010441,FBgn0011692,FBgn0086757,FBgn0033052,FBgn0013756,FBgn0086357,FBgn0262743,FBgn0032397,FBgn0087013,FBgn0015298,FBgn0027338,FBgn0264493,FBgn0000115,FBgn0034310,FBgn0003371,FBgn0267727,FBgn0027287,FBgn0264922,FBgn0014366,FBgn0035233,FBgn0086358,FBgn0024889,FBgn0000119,FBgn0037020,FBg…
GO:0044433	cytoplasmic vesicle part	cellular_component	2.0343e-06	2.77e-05	23	3767	32	12231	FBgn0000183,FBgn0024509,FBgn0261722,FBgn0036141,FBgn0033339,FBgn0033460,FBgn0028969,FBgn0008635,FBgn0025724,FBgn0004242,FBgn0264855,FBgn0028968,FBgn0031424,FBgn0025725,FBgn0262125,FBgn0030230,FBgn0024833,FBgn0010380,FBgn0039132,FBgn0024814,FBgn0000319,FBgn0030089,FBgn0029709
GO:0071897	DNA biosynthetic process	biological_process	2.0363e-06	2.77e-05	23	3767	32	12231	FBgn0037554,FBgn0011766,FBgn0026143,FBgn0262619,FBgn0002914,FBgn0011763,FBgn0015799,FBgn0002906,FBgn0033260,FBgn0033081,FBgn0023509,FBgn0030506,FBgn0263979,FBgn0010382,FBgn0025815,FBgn0033846,FBgn0000996,FBgn0000307,FBgn0039858,FBgn0005655,FBgn0086695,FBgn0002891,FBgn0038035
GO:0034976	response to endoplasmic reticulum stress	biological_process	2.053e-06	2.7889e-05	24	3767	34	12231	FBgn0033639,FBgn0029870,FBgn0261014,FBgn0032120,FBgn0023511,FBgn0039875,FBgn0038438,FBgn0024329,FBgn0013756,FBgn0004926,FBgn0250820,FBgn0052423,FBgn0027348,FBgn0031950,FBgn0033638,FBgn0037327,FBgn0038515,FBgn0035484,FBgn0039633,FBgn0013762,FBgn0261984,FBgn0030590,FBgn0021872,FBgn0086712
GO:0035222	wing disc pattern formation	biological_process	2.2263e-06	3.0201e-05	41	3767	71	12231	FBgn0027548,FBgn0261885,FBgn0262582,FBgn0020238,FBgn0053554,FBgn0004837,FBgn0004009,FBgn0041111,FBgn0013718,FBgn0039380,FBgn0011648,FBgn0040071,FBgn0003317,FBgn0016977,FBgn0031005,FBgn0003053,FBgn0002735,FBgn0000099,FBgn0036814,FBgn0000577,FBgn0040388,FBgn0000179,FBgn0000083,FBgn0014037,FBgn0001169,FBgn0000490,FBgn0028387,FBgn0019947,FBgn0005322,FBgn0020306,FBgn0010575,FBgn0261458,FBgn0001269,FBg…
GO:0045859	regulation of protein kinase activity	biological_process	2.2503e-06	3.0484e-05	47	3767	85	12231	FBgn0041171,FBgn0020510,FBgn0262733,FBgn0010303,FBgn0012058,FBgn0000404,FBgn0031044,FBgn0261108,FBgn0000405,FBgn0040206,FBgn0011737,FBgn0010314,FBgn0011217,FBgn0025674,FBgn0030613,FBgn0015399,FBgn0020224,FBgn0000351,FBgn0036844,FBgn0026192,FBgn0004638,FBgn0259791,FBgn0030018,FBgn0261786,FBgn0263237,FBgn0264922,FBgn0025455,FBgn0016081,FBgn0264848,FBgn0024326,FBgn0261524,FBgn0032378,FBgn0027053,FBg…
GO:0007298	border follicle cell migration	biological_process	2.32e-06	3.1384e-05	59	3767	114	12231	FBgn0003416,FBgn0243511,FBgn0053558,FBgn0001250,FBgn0026192,FBgn0023423,FBgn0000097,FBgn0031304,FBgn0000482,FBgn0020224,FBgn0266557,FBgn0260934,FBgn0263987,FBgn0032006,FBgn0010269,FBgn0267390,FBgn0004657,FBgn0003984,FBgn0260635,FBgn0003392,FBgn0024811,FBgn0031450,FBgn0004838,FBgn0003079,FBgn0010303,FBgn0000546,FBgn0266521,FBgn0003870,FBgn0003388,FBgn0000163,FBgn0262127,FBgn0262740,FBgn0005638,FBg…
GO:0036465	synaptic vesicle recycling	biological_process	2.4214e-06	3.2665e-05	32	3767	51	12231	FBgn0010380,FBgn0053094,FBgn0026479,FBgn0030230,FBgn0003392,FBgn0010300,FBgn0030089,FBgn0000319,FBgn0024814,FBgn0000183,FBgn0086372,FBgn0039132,FBgn0020251,FBgn0261671,FBgn0024833,FBgn0004179,FBgn0264855,FBgn0086784,FBgn0261279,FBgn0010348,FBgn0016975,FBgn0027356,FBgn0000115,FBgn0030057,FBgn0034691,FBgn0261722,FBgn0038816,FBgn0035060,FBgn0027363,FBgn0004242,FBgn0003210,FBgn0028582
GO:0048488	synaptic vesicle endocytosis	biological_process	2.4214e-06	3.2665e-05	32	3767	51	12231	FBgn0024814,FBgn0000319,FBgn0030089,FBgn0010300,FBgn0003392,FBgn0030230,FBgn0026479,FBgn0010380,FBgn0053094,FBgn0086372,FBgn0000183,FBgn0027356,FBgn0010348,FBgn0016975,FBgn0261279,FBgn0086784,FBgn0264855,FBgn0004179,FBgn0020251,FBgn0024833,FBgn0261671,FBgn0039132,FBgn0028582,FBgn0003210,FBgn0027363,FBgn0004242,FBgn0035060,FBgn0038816,FBgn0261722,FBgn0034691,FBgn0030057,FBgn0000115
GO:0048619	embryonic hindgut morphogenesis	biological_process	2.4289e-06	3.2722e-05	32	3767	51	12231	FBgn0000546,FBgn0003169,FBgn0002552,FBgn0029006,FBgn0032006,FBgn0004009,FBgn0004893,FBgn0039257,FBgn0003254,FBgn0002985,FBgn0259685,FBgn0011723,FBgn0011648,FBgn0003651,FBgn0003310,FBgn0001325,FBgn0020493,FBgn0004635,FBgn0000543,FBgn0265434,FBgn0024244,FBgn0000137,FBgn0003041,FBgn0000490,FBgn0000633,FBgn0000251,FBgn0026562,FBgn0016075,FBgn0086901,FBgn0003731,FBgn0003118,FBgn0001311
GO:0009314	response to radiation	biological_process	2.4891e-06	3.3486e-05	78	3767	162	12231	FBgn0261532,FBgn0000121,FBgn0021796,FBgn0002938,FBgn0085387,FBgn0005614,FBgn0003651,FBgn0001123,FBgn0001179,FBgn0002937,FBgn0037874,FBgn0260798,FBgn0020238,FBgn0031972,FBgn0030054,FBgn0263111,FBgn0003249,FBgn0036519,FBgn0027338,FBgn0003380,FBgn0033075,FBgn0053193,FBgn0261456,FBgn0015582,FBgn0260749,FBgn0261549,FBgn0086784,FBgn0261850,FBgn0011739,FBgn0004623,FBgn0039055,FBgn0003042,FBgn0019972,FBg…
GO:0018193	peptidyl-amino acid modification	biological_process	2.5646e-06	3.4454e-05	83	3767	175	12231	FBgn0040372,FBgn0036973,FBgn0263979,FBgn0014340,FBgn0262733,FBgn0052238,FBgn0033089,FBgn0028484,FBgn0027490,FBgn0028926,FBgn0040206,FBgn0261617,FBgn0000206,FBgn0031208,FBgn0000629,FBgn0020224,FBgn0039067,FBgn0039347,FBgn0052133,FBgn0027617,FBgn0003862,FBgn0004638,FBgn0024222,FBgn0086657,FBgn0026147,FBgn0264785,FBgn0037834,FBgn0040022,FBgn0029174,FBgn0004864,FBgn0004432,FBgn0036964,FBgn0027889,FBg…
GO:0016319	mushroom body development	biological_process	2.5819e-06	3.4639e-05	40	3767	69	12231	FBgn0264598,FBgn0000259,FBgn0261446,FBgn0025743,FBgn0000448,FBgn0010051,FBgn0015754,FBgn0264975,FBgn0003969,FBgn0000547,FBgn0031500,FBgn0011300,FBgn0264442,FBgn0026722,FBgn0028734,FBgn0034975,FBgn0024277,FBgn0025800,FBgn0000543,FBgn0024836,FBgn0034012,FBgn0031030,FBgn0266572,FBgn0039861,FBgn0003720,FBgn0032059,FBgn0040324,FBgn0000635,FBgn0040283,FBgn0266098,FBgn0019650,FBgn0000546,FBgn0262733,FBg…
GO:0004386	helicase activity	molecular_function	2.6372e-06	3.5332e-05	56	3767	107	12231	FBgn0015075,FBgn0017577,FBgn0026713,FBgn0262519,FBgn0027375,FBgn0004556,FBgn0033160,FBgn0035720,FBgn0030855,FBgn0032154,FBgn0029798,FBgn0032919,FBgn0261109,FBgn0038344,FBgn0020633,FBgn0250786,FBgn0020306,FBgn0037549,FBgn0026143,FBgn0032157,FBgn0003483,FBgn0002905,FBgn0261850,FBgn0035194,FBgn0031540,FBgn0030877,FBgn0035842,FBgn0011604,FBgn0004419,FBgn0001565,FBgn0086613,FBgn0027602,FBgn0025815,FBg…
GO:0007442	hindgut morphogenesis	biological_process	2.6737e-06	3.5724e-05	36	3767	60	12231	FBgn0001311,FBgn0003118,FBgn0003731,FBgn0004644,FBgn0004864,FBgn0016917,FBgn0086901,FBgn0043903,FBgn0026562,FBgn0016075,FBgn0000251,FBgn0000633,FBgn0000490,FBgn0003041,FBgn0000137,FBgn0024244,FBgn0265434,FBgn0000543,FBgn0004635,FBgn0020493,FBgn0001325,FBgn0003310,FBgn0259685,FBgn0003651,FBgn0011723,FBgn0011648,FBgn0002985,FBgn0003254,FBgn0039257,FBgn0004893,FBgn0004009,FBgn0032006,FBgn0029006,FBg…
GO:0061525	hindgut development	biological_process	2.6737e-06	3.5724e-05	36	3767	60	12231	FBgn0004635,FBgn0000543,FBgn0020493,FBgn0001325,FBgn0003310,FBgn0259685,FBgn0011648,FBgn0011723,FBgn0003651,FBgn0002985,FBgn0039257,FBgn0003254,FBgn0004009,FBgn0004893,FBgn0032006,FBgn0029006,FBgn0002552,FBgn0000546,FBgn0003169,FBgn0001311,FBgn0003731,FBgn0003118,FBgn0004644,FBgn0004864,FBgn0086901,FBgn0043903,FBgn0016917,FBgn0016075,FBgn0026562,FBgn0000251,FBgn0000633,FBgn0000490,FBgn0265434,FBg…
GO:0061640	cytoskeleton-dependent cytokinesis	biological_process	2.967e-06	3.9589e-05	48	3767	88	12231	FBgn0015399,FBgn0013718,FBgn0011661,FBgn0041111,FBgn0035762,FBgn0267378,FBgn0002466,FBgn0004167,FBgn0004635,FBgn0261385,FBgn0026479,FBgn0011692,FBgn0053094,FBgn0264291,FBgn0028968,FBgn0000042,FBgn0262473,FBgn0003392,FBgn0263979,FBgn0032848,FBgn0053554,FBgn0014029,FBgn0024227,FBgn0032105,FBgn0000405,FBgn0000711,FBgn0262468,FBgn0004373,FBgn0031536,FBgn0037473,FBgn0015625,FBgn0265297,FBgn0000163,FBg…
GO:0008586	imaginal disc-derived wing vein morphogenesis	biological_process	2.9908e-06	3.9851e-05	30	3767	47	12231	FBgn0260003,FBgn0011648,FBgn0260938,FBgn0002783,FBgn0016977,FBgn0021818,FBgn0031005,FBgn0003731,FBgn0024234,FBgn0041184,FBgn0004635,FBgn0263930,FBgn0261885,FBgn0003079,FBgn0000490,FBgn0001169,FBgn0000212,FBgn0042085,FBgn0003984,FBgn0003557,FBgn0011817,FBgn0000317,FBgn0261983,FBgn0261648,FBgn0003256,FBgn0004837,FBgn0086901,FBgn0011715,FBgn0010825,FBgn0003175
GO:0046580	negative regulation of Ras protein signal transduction	biological_process	3.0125e-06	4.0031e-05	17	3767	21	12231	FBgn0000097,FBgn0017581,FBgn0021760,FBgn0034240,FBgn0010909,FBgn0030505,FBgn0015269,FBgn0032694,FBgn0013469,FBgn0004390,FBgn0261570,FBgn0025740,FBgn0086901,FBgn0036846,FBgn0014388,FBgn0262866,FBgn0003969
GO:0051058	negative regulation of small GTPase mediated signal transduction	biological_process	3.0125e-06	4.0031e-05	17	3767	21	12231	FBgn0015269,FBgn0032694,FBgn0030505,FBgn0010909,FBgn0034240,FBgn0017581,FBgn0021760,FBgn0000097,FBgn0036846,FBgn0262866,FBgn0003969,FBgn0014388,FBgn0086901,FBgn0025740,FBgn0004390,FBgn0013469,FBgn0261570
GO:0003729	mRNA binding	molecular_function	3.1807e-06	4.2208e-05	90	3767	194	12231	FBgn0024183,FBgn0017430,FBgn0265184,FBgn0020660,FBgn0031318,FBgn0053505,FBgn0028734,FBgn0014024,FBgn0263603,FBgn0263396,FBgn0034598,FBgn0011571,FBgn0004227,FBgn0034572,FBgn0035047,FBgn0265297,FBgn0034237,FBgn0005593,FBgn0023441,FBgn0262734,FBgn0039730,FBgn0036317,FBgn0014870,FBgn0036838,FBgn0086675,FBgn0005648,FBgn0017457,FBgn0005649,FBgn0003575,FBgn0024542,FBgn0003165,FBgn0027548,FBgn0263352,FBg…
GO:0031647	regulation of protein stability	biological_process	3.269e-06	4.3322e-05	29	3767	45	12231	FBgn0001079,FBgn0028837,FBgn0027055,FBgn0037236,FBgn0036897,FBgn0039214,FBgn0264493,FBgn0264695,FBgn0003390,FBgn0000017,FBgn0030352,FBgn0016756,FBgn0034051,FBgn0032725,FBgn0259685,FBgn0011217,FBgn0004889,FBgn0261437,FBgn0038065,FBgn0000352,FBgn0022764,FBgn0042085,FBgn0027054,FBgn0027057,FBgn0264492,FBgn0040206,FBgn0026371,FBgn0027053,FBgn0001083
GO:0030261	chromosome condensation	biological_process	3.2829e-06	4.3447e-05	29	3767	45	12231	FBgn0011474,FBgn0004367,FBgn0027835,FBgn0003732,FBgn0260399,FBgn0017577,FBgn0003612,FBgn0267398,FBgn0261618,FBgn0267351,FBgn0023423,FBgn0004374,FBgn0032929,FBgn0004924,FBgn0026143,FBgn0259876,FBgn0003483,FBgn0034958,FBgn0086359,FBgn0015391,FBgn0027783,FBgn0039680,FBgn0024227,FBgn0260991,FBgn0015218,FBgn0002914,FBgn0260985,FBgn0262526,FBgn0086906
GO:0043549	regulation of kinase activity	biological_process	3.4893e-06	4.6102e-05	47	3767	86	12231	FBgn0015625,FBgn0262699,FBgn0020440,FBgn0026323,FBgn0003371,FBgn0010909,FBgn0037816,FBgn0028546,FBgn0010433,FBgn0261786,FBgn0263237,FBgn0030018,FBgn0259791,FBgn0024326,FBgn0264848,FBgn0016081,FBgn0025455,FBgn0264922,FBgn0002121,FBgn0001086,FBgn0025743,FBgn0032378,FBgn0027053,FBgn0261524,FBgn0040505,FBgn0010316,FBgn0020224,FBgn0015399,FBgn0030613,FBgn0011217,FBgn0025674,FBgn0026192,FBgn0004638,FBg…
GO:0008358	maternal determination of anterior/posterior axis, embryo	biological_process	3.493e-06	4.6102e-05	47	3767	86	12231	FBgn0262526,FBgn0261014,FBgn0026238,FBgn0004838,FBgn0259139,FBgn0004875,FBgn0260940,FBgn0001233,FBgn0001308,FBgn0000319,FBgn0000273,FBgn0000615,FBgn0260934,FBgn0027948,FBgn0024371,FBgn0038167,FBgn0011661,FBgn0261854,FBgn0004882,FBgn0037573,FBgn0003317,FBgn0261064,FBgn0000183,FBgn0004510,FBgn0003475,FBgn0003520,FBgn0031985,FBgn0005695,FBgn0015797,FBgn0263396,FBgn0032340,FBgn0261524,FBgn0027053,FBg…
GO:0036464	cytoplasmic ribonucleoprotein granule	cellular_component	3.5841e-06	4.7241e-05	28	3767	43	12231	FBgn0036621,FBgn0262526,FBgn0016070,FBgn0004419,FBgn0004838,FBgn0028707,FBgn0015218,FBgn0261014,FBgn0262743,FBgn0051992,FBgn0034921,FBgn0003483,FBgn0000615,FBgn0052016,FBgn0032340,FBgn0020261,FBgn0036735,FBgn0263231,FBgn0000114,FBgn0250816,FBgn0020279,FBgn0261266,FBgn0266053,FBgn0263974,FBgn0003520,FBgn0267385,FBgn0041775,FBgn0016034
GO:0008021	synaptic vesicle	cellular_component	3.6361e-06	4.7841e-05	41	3767	72	12231	FBgn0036141,FBgn0036819,FBgn0261722,FBgn0266757,FBgn0035060,FBgn0004242,FBgn0003210,FBgn0026378,FBgn0266756,FBgn0039132,FBgn0024833,FBgn0004179,FBgn0031424,FBgn0030816,FBgn0264855,FBgn0053547,FBgn0053653,FBgn0027505,FBgn0016975,FBgn0002121,FBgn0005586,FBgn0039900,FBgn0260964,FBgn0030613,FBgn0259824,FBgn0004868,FBgn0262518,FBgn0031455,FBgn0033339,FBgn0086372,FBgn0010380,FBgn0030230,FBgn0086677,FBg…
GO:0043566	structure-specific DNA binding	molecular_function	3.6394e-06	4.7841e-05	41	3767	72	12231	FBgn0002887,FBgn0264954,FBgn0026573,FBgn0010173,FBgn0001978,FBgn0039559,FBgn0015546,FBgn0014143,FBgn0035769,FBgn0026869,FBgn0061200,FBgn0086908,FBgn0003567,FBgn0032154,FBgn0004401,FBgn0022361,FBgn0027835,FBgn0036486,FBgn0038197,FBgn0003430,FBgn0011659,FBgn0038371,FBgn0029504,FBgn0037540,FBgn0004897,FBgn0029123,FBgn0004838,FBgn0011481,FBgn0002441,FBgn0002906,FBgn0029977,FBgn0013756,FBgn0045759,FBg…
GO:1902806	regulation of cell cycle G1/S phase transition	biological_process	3.6563e-06	4.7917e-05	18	3767	23	12231	FBgn0034646,FBgn0011648,FBgn0031885,FBgn0002783,FBgn0029133,FBgn0004859,FBgn0003731,FBgn0039858,FBgn0001965,FBgn0029504,FBgn0015799,FBgn0000212,FBgn0039403,FBgn0035194,FBgn0024371,FBgn0004837,FBgn0026143,FBgn0010316
GO:2000045	regulation of G1/S transition of mitotic cell cycle	biological_process	3.6563e-06	4.7917e-05	18	3767	23	12231	FBgn0034646,FBgn0011648,FBgn0031885,FBgn0002783,FBgn0029133,FBgn0004859,FBgn0003731,FBgn0039858,FBgn0001965,FBgn0029504,FBgn0015799,FBgn0000212,FBgn0039403,FBgn0035194,FBgn0024371,FBgn0004837,FBgn0026143,FBgn0010316
GO:0005798	Golgi-associated vesicle	cellular_component	3.6599e-06	4.7917e-05	18	3767	23	12231	FBgn0025724,FBgn0008635,FBgn0028969,FBgn0024187,FBgn0024814,FBgn0264560,FBgn0029709,FBgn0029830,FBgn0000319,FBgn0030089,FBgn0025725,FBgn0265351,FBgn0036919,FBgn0001087,FBgn0028968,FBgn0039132,FBgn0010380,FBgn0024833
GO:0045887	positive regulation of synaptic growth at neuromuscular junction	biological_process	3.6743e-06	4.7977e-05	18	3767	23	12231	FBgn0003317,FBgn0267698,FBgn0034265,FBgn0011648,FBgn0038747,FBgn0024234,FBgn0263111,FBgn0024277,FBgn0024179,FBgn0010415,FBgn0037884,FBgn0261788,FBgn0053094,FBgn0011571,FBgn0001624,FBgn0036257,FBgn0038063,FBgn0011817
GO:1904398	positive regulation of neuromuscular junction development	biological_process	3.6743e-06	4.7977e-05	18	3767	23	12231	FBgn0011817,FBgn0036257,FBgn0001624,FBgn0038063,FBgn0261788,FBgn0011571,FBgn0053094,FBgn0024277,FBgn0024179,FBgn0010415,FBgn0037884,FBgn0038747,FBgn0024234,FBgn0263111,FBgn0034265,FBgn0011648,FBgn0003317,FBgn0267698
GO:0000819	sister chromatid segregation	biological_process	3.6865e-06	4.8072e-05	54	3767	103	12231	FBgn0035640,FBgn0024188,FBgn0003483,FBgn0259876,FBgn0039680,FBgn0260991,FBgn0264848,FBgn0044324,FBgn0031549,FBgn0003884,FBgn0260987,FBgn0036059,FBgn0086906,FBgn0000996,FBgn0026401,FBgn0026326,FBgn0035627,FBgn0003371,FBgn0040208,FBgn0000063,FBgn0061476,FBgn0038300,FBgn0010314,FBgn0040283,FBgn0015615,FBgn0030268,FBgn0000405,FBgn0030500,FBgn0034958,FBgn0013756,FBgn0024227,FBgn0027783,FBgn0086359,FBg…
GO:0045177	apical part of cell	cellular_component	3.7034e-06	4.8228e-05	54	3767	103	12231	FBgn0016078,FBgn0034408,FBgn0005536,FBgn0267488,FBgn0019947,FBgn0016081,FBgn0265434,FBgn0011202,FBgn0036715,FBgn0020278,FBgn0043903,FBgn0002577,FBgn0013726,FBgn0262867,FBgn0000008,FBgn0039620,FBgn0261873,FBgn0023172,FBgn0004197,FBgn0000017,FBgn0031799,FBgn0066365,FBgn0262127,FBgn0263111,FBgn0000163,FBgn0039709,FBgn0015589,FBgn0039232,FBgn0002873,FBgn0001624,FBgn0004359,FBgn0010341,FBgn0000317,FBg…
GO:0031344	regulation of cell projection organization	biological_process	3.8463e-06	5.0023e-05	49	3767	91	12231	FBgn0045852,FBgn0000163,FBgn0023172,FBgn0267698,FBgn0264598,FBgn0030057,FBgn0259984,FBgn0053193,FBgn0011592,FBgn0015754,FBgn0015279,FBgn0086901,FBgn0010379,FBgn0011739,FBgn0026181,FBgn0262125,FBgn0016081,FBgn0024277,FBgn0028734,FBgn0085447,FBgn0086680,FBgn0003041,FBgn0011202,FBgn0014133,FBgn0034697,FBgn0000578,FBgn0000464,FBgn0243511,FBgn0267002,FBgn0250753,FBgn0041781,FBgn0000606,FBgn0026192,FBg…
GO:0016579	protein deubiquitination	biological_process	3.8763e-06	5.0346e-05	27	3767	41	12231	FBgn0033916,FBgn0037734,FBgn0050421,FBgn0035402,FBgn0030366,FBgn0052479,FBgn0033738,FBgn0028476,FBgn0032214,FBgn0262166,FBgn0261823,FBgn0039214,FBgn0031187,FBgn0036180,FBgn0000239,FBgn0013717,FBgn0016756,FBgn0260936,FBgn0005632,FBgn0035593,FBgn0038862,FBgn0029819,FBgn0003023,FBgn0026738,FBgn0011327,FBgn0029763,FBgn0029853
GO:0007018	microtubule-based movement	biological_process	4.0192e-06	5.2132e-05	60	3767	118	12231	FBgn0001108,FBgn0267002,FBgn0004378,FBgn0004379,FBgn0031955,FBgn0004374,FBgn0001079,FBgn0030276,FBgn0035581,FBgn0032446,FBgn0262123,FBgn0011606,FBgn0030268,FBgn0000405,FBgn0259108,FBgn0035317,FBgn0267390,FBgn0034577,FBgn0002924,FBgn0001308,FBgn0259483,FBgn0033447,FBgn0013812,FBgn0011692,FBgn0267432,FBgn0040232,FBgn0011745,FBgn0266521,FBgn0086446,FBgn0010235,FBgn0039140,FBgn0265102,FBgn0013811,FBg…
GO:0018205	peptidyl-lysine modification	biological_process	4.0864e-06	5.2934e-05	46	3767	84	12231	FBgn0000629,FBgn0052133,FBgn0039067,FBgn0003862,FBgn0267398,FBgn0263979,FBgn0036973,FBgn0040372,FBgn0039904,FBgn0039280,FBgn0027378,FBgn0014340,FBgn0261617,FBgn0028926,FBgn0027490,FBgn0031208,FBgn0023216,FBgn0029512,FBgn0032321,FBgn0031885,FBgn0040066,FBgn0037376,FBgn0025825,FBgn0023518,FBgn0086908,FBgn0263667,FBgn0030891,FBgn0032030,FBgn0011474,FBgn0036039,FBgn0034722,FBgn0030121,FBgn0261573,FBg…
GO:0006402	mRNA catabolic process	biological_process	4.1671e-06	5.3907e-05	26	3767	39	12231	FBgn0266053,FBgn0019890,FBgn0261984,FBgn0036239,FBgn0037707,FBgn0250816,FBgn0039260,FBgn0031047,FBgn0017550,FBgn0051992,FBgn0262739,FBgn0003483,FBgn0034921,FBgn0260444,FBgn0020261,FBgn0085436,FBgn0011207,FBgn0033029,FBgn0016070,FBgn0003165,FBgn0263968,FBgn0032296,FBgn0033376,FBgn0263396,FBgn0033352,FBgn0005648
GO:0007474	imaginal disc-derived wing vein specification	biological_process	4.4469e-06	5.7427e-05	32	3767	52	12231	FBgn0266711,FBgn0016693,FBgn0263667,FBgn0004644,FBgn0029067,FBgn0001269,FBgn0039066,FBgn0003731,FBgn0024234,FBgn0000490,FBgn0265048,FBgn0020251,FBgn0000139,FBgn0015919,FBgn0000212,FBgn0263593,FBgn0011817,FBgn0003256,FBgn0034072,FBgn0260003,FBgn0002783,FBgn0036844,FBgn0031005,FBgn0000577,FBgn0004635,FBgn0000395,FBgn0262582,FBgn0003984,FBgn0260798,FBgn0262866,FBgn0052372,FBgn0011715
GO:0000281	mitotic cytokinesis	biological_process	4.4509e-06	5.7427e-05	32	3767	52	12231	FBgn0015625,FBgn0037473,FBgn0000163,FBgn0265434,FBgn0011202,FBgn0003041,FBgn0011708,FBgn0086356,FBgn0086784,FBgn0026181,FBgn0259876,FBgn0013726,FBgn0261787,FBgn0015399,FBgn0267378,FBgn0261385,FBgn0004635,FBgn0004167,FBgn0002466,FBgn0053094,FBgn0011692,FBgn0026479,FBgn0263979,FBgn0003392,FBgn0262473,FBgn0028968,FBgn0000042,FBgn0024227,FBgn0053554,FBgn0014029,FBgn0032105,FBgn0000405
GO:0051186	cofactor metabolic process	biological_process	4.533e-06	5.8409e-05	55	3767	106	12231	FBgn0004057,FBgn0023477,FBgn0037574,FBgn0030407,FBgn0031912,FBgn0035436,FBgn0250906,FBgn0052174,FBgn0266268,FBgn0043456,FBgn0085484,FBgn0051472,FBgn0020764,FBgn0003965,FBgn0039280,FBgn0038074,FBgn0020385,FBgn0039993,FBgn0000579,FBgn0050410,FBgn0002641,FBgn0039635,FBgn0011205,FBgn0032945,FBgn0039254,FBgn0260229,FBgn0034390,FBgn0034072,FBgn0032922,FBgn0053208,FBgn0000064,FBgn0029158,FBgn0039156,FBg…
GO:0005876	spindle microtubule	cellular_component	4.5409e-06	5.8434e-05	20	3767	27	12231	FBgn0019968,FBgn0003124,FBgn0011692,FBgn0033845,FBgn0027066,FBgn0003884,FBgn0026620,FBgn0035640,FBgn0015754,FBgn0003545,FBgn0030268,FBgn0015600,FBgn0021760,FBgn0061476,FBgn0020503,FBgn0004379,FBgn0036814,FBgn0025874,FBgn0003268,FBgn0001108
GO:0001763	morphogenesis of a branching structure	biological_process	4.5943e-06	5.9043e-05	36	3767	61	12231	FBgn0000163,FBgn0001311,FBgn0010113,FBgn0003118,FBgn0010350,FBgn0003870,FBgn0266465,FBgn0024236,FBgn0011739,FBgn0000547,FBgn0014388,FBgn0000490,FBgn0020251,FBgn0264785,FBgn0010452,FBgn0036844,FBgn0053556,FBgn0026192,FBgn0001180,FBgn0004635,FBgn0003254,FBgn0026207,FBgn0261854,FBgn0038755,FBgn0020299,FBgn0011642,FBgn0037917,FBgn0010341,FBgn0004009,FBgn0000382,FBgn0038916,FBgn0041171,FBgn0015019,FBg…
GO:0006417	regulation of translation	biological_process	4.8182e-06	6.1839e-05	45	3767	82	12231	FBgn0011296,FBgn0261560,FBgn0041188,FBgn0010300,FBgn0260444,FBgn0034858,FBgn0085436,FBgn0035916,FBgn0016070,FBgn0262526,FBgn0003165,FBgn0004838,FBgn0259139,FBgn0037135,FBgn0026083,FBgn0038100,FBgn0003520,FBgn0250753,FBgn0263352,FBgn0036239,FBgn0264001,FBgn0011837,FBgn0265089,FBgn0004882,FBgn0037327,FBgn0017550,FBgn0011666,FBgn0262739,FBgn0053100,FBgn0028426,FBgn0015279,FBgn0041191,FBgn0087039,FBg…
GO:0007314	oocyte anterior/posterior axis specification	biological_process	4.8339e-06	6.1958e-05	45	3767	82	12231	FBgn0003520,FBgn0004510,FBgn0003475,FBgn0261854,FBgn0004882,FBgn0037573,FBgn0261064,FBgn0000183,FBgn0011661,FBgn0260934,FBgn0027948,FBgn0024371,FBgn0038167,FBgn0001308,FBgn0260940,FBgn0001233,FBgn0000319,FBgn0000273,FBgn0000615,FBgn0261014,FBgn0026238,FBgn0004838,FBgn0259139,FBgn0004875,FBgn0262526,FBgn0026431,FBgn0263102,FBgn0016034,FBgn0040294,FBgn0004242,FBgn0000163,FBgn0000181,FBgn0003731,FBg…
GO:0042326	negative regulation of phosphorylation	biological_process	5.0041e-06	6.4057e-05	31	3767	50	12231	FBgn0003371,FBgn0000351,FBgn0036844,FBgn0020440,FBgn0003053,FBgn0026192,FBgn0004638,FBgn0028546,FBgn0011217,FBgn0015399,FBgn0020224,FBgn0000711,FBgn0262699,FBgn0013303,FBgn0031885,FBgn0031044,FBgn0001332,FBgn0034577,FBgn0001086,FBgn0002121,FBgn0027053,FBgn0041100,FBgn0004009,FBgn0040206,FBgn0011737,FBgn0010314,FBgn0041171,FBgn0261786,FBgn0031450,FBgn0264848,FBgn0012058
GO:0046620	regulation of organ growth	biological_process	5.0166e-06	6.4132e-05	31	3767	50	12231	FBgn0001332,FBgn0005198,FBgn0010379,FBgn0011739,FBgn0011642,FBgn0266557,FBgn0263289,FBgn0000547,FBgn0000504,FBgn0263933,FBgn0015279,FBgn0000490,FBgn0020386,FBgn0020251,FBgn0028734,FBgn0001075,FBgn0021796,FBgn0030530,FBgn0003944,FBgn0263930,FBgn0259685,FBgn0010575,FBgn0261456,FBgn0052418,FBgn0053193,FBgn0026317,FBgn0038755,FBgn0031030,FBgn0004644,FBgn0020279,FBgn0015806
GO:0002682	regulation of immune system process	biological_process	5.0244e-06	6.4148e-05	84	3767	180	12231	FBgn0011766,FBgn0027053,FBgn0019637,FBgn0261800,FBgn0013799,FBgn0003507,FBgn0043903,FBgn0020306,FBgn0032157,FBgn0086358,FBgn0086680,FBgn0011764,FBgn0016078,FBgn0000251,FBgn0003495,FBgn0003731,FBgn0000541,FBgn0003612,FBgn0260632,FBgn0003118,FBgn0003371,FBgn0035976,FBgn0260936,FBgn0037376,FBgn0028744,FBgn0045035,FBgn0038760,FBgn0004009,FBgn0263289,FBgn0260866,FBgn0010303,FBgn0067783,FBgn0043575,FBg…
GO:0008593	regulation of Notch signaling pathway	biological_process	5.1637e-06	6.5841e-05	52	3767	99	12231	FBgn0032499,FBgn0265523,FBgn0260749,FBgn0003557,FBgn0000499,FBgn0002121,FBgn0002566,FBgn0023023,FBgn0020306,FBgn0001169,FBgn0024833,FBgn0019947,FBgn0023510,FBgn0035060,FBgn0034722,FBgn0022023,FBgn0000541,FBgn0003090,FBgn0261573,FBgn0028582,FBgn0259785,FBgn0034180,FBgn0039402,FBgn0033901,FBgn0004197,FBgn0260940,FBgn0261983,FBgn0053554,FBgn0029094,FBgn0000319,FBgn0029881,FBgn0040206,FBgn0263933,FBg…
GO:0051302	regulation of cell division	biological_process	5.3405e-06	6.8006e-05	47	3767	87	12231	FBgn0035640,FBgn0001086,FBgn0261850,FBgn0264848,FBgn0003884,FBgn0031549,FBgn0044324,FBgn0266717,FBgn0000137,FBgn0260399,FBgn0026326,FBgn0261811,FBgn0003371,FBgn0000063,FBgn0000114,FBgn0001320,FBgn0262699,FBgn0061476,FBgn0000711,FBgn0015546,FBgn0010314,FBgn0261617,FBgn0011606,FBgn0028691,FBgn0013756,FBgn0002924,FBgn0086359,FBgn0000404,FBgn0020238,FBgn0002973,FBgn0002914,FBgn0029504,FBgn0041171,FBg…
GO:0019827	stem cell population maintenance	biological_process	5.7411e-06	7.2917e-05	38	3767	66	12231	FBgn0016917,FBgn0015754,FBgn0262169,FBgn0004864,FBgn0000499,FBgn0011666,FBgn0262739,FBgn0001086,FBgn0034975,FBgn0262527,FBgn0011207,FBgn0001169,FBgn0000490,FBgn0263930,FBgn0038197,FBgn0026597,FBgn0003731,FBgn0041184,FBgn0032515,FBgn0003371,FBgn0000114,FBgn0004197,FBgn0260936,FBgn0004009,FBgn0004657,FBgn0023216,FBgn0002932,FBgn0003169,FBgn0013469,FBgn0263510,FBgn0010382,FBgn0020493,FBgn0039120,FBg…
GO:0098727	maintenance of cell number	biological_process	5.7411e-06	7.2917e-05	38	3767	66	12231	FBgn0004581,FBgn0011217,FBgn0011648,FBgn0021760,FBgn0039120,FBgn0003317,FBgn0020493,FBgn0010382,FBgn0263510,FBgn0013469,FBgn0003169,FBgn0002932,FBgn0023216,FBgn0004657,FBgn0004009,FBgn0260936,FBgn0004197,FBgn0000114,FBgn0003371,FBgn0032515,FBgn0041184,FBgn0003731,FBgn0026597,FBgn0263930,FBgn0038197,FBgn0000490,FBgn0001169,FBgn0011207,FBgn0262527,FBgn0034975,FBgn0262739,FBgn0011666,FBgn0001086,FBg…
GO:0006732	coenzyme metabolic process	biological_process	6.0936e-06	7.7294e-05	51	3767	97	12231	FBgn0029158,FBgn0039156,FBgn0053208,FBgn0000064,FBgn0032922,FBgn0034390,FBgn0034072,FBgn0005278,FBgn0261285,FBgn0020236,FBgn0012034,FBgn0030683,FBgn0263782,FBgn0001186,FBgn0003074,FBgn0001091,FBgn0027601,FBgn0033373,FBgn0001258,FBgn0050290,FBgn0039737,FBgn0267385,FBgn0035632,FBgn0030239,FBgn0263864,FBgn0030512,FBgn0032054,FBgn0003965,FBgn0039280,FBgn0051472,FBgn0085484,FBgn0043456,FBgn0250906,FBg…
GO:0000070	mitotic sister chromatid segregation	biological_process	6.1127e-06	7.7436e-05	51	3767	97	12231	FBgn0261618,FBgn0267398,FBgn0260639,FBgn0003268,FBgn0003732,FBgn0034231,FBgn0011661,FBgn0263231,FBgn0015600,FBgn0021760,FBgn0004374,FBgn0052707,FBgn0030500,FBgn0034958,FBgn0013756,FBgn0027783,FBgn0024227,FBgn0086359,FBgn0015391,FBgn0010314,FBgn0040283,FBgn0000405,FBgn0030268,FBgn0015615,FBgn0262526,FBgn0035766,FBgn0260985,FBgn0040232,FBgn0000404,FBgn0015218,FBgn0026401,FBgn0026326,FBgn0035627,FBg…
GO:0002252	immune effector process	biological_process	6.1301e-06	7.7556e-05	51	3767	97	12231	FBgn0022787,FBgn0024222,FBgn0264707,FBgn0001108,FBgn0013762,FBgn0087035,FBgn0036980,FBgn0052133,FBgn0026616,FBgn0011740,FBgn0264078,FBgn0028982,FBgn0040068,FBgn0261854,FBgn0028541,FBgn0034068,FBgn0039634,FBgn0040324,FBgn0038760,FBgn0263289,FBgn0010341,FBgn0260866,FBgn0037116,FBgn0025936,FBgn0002526,FBgn0262473,FBgn0028707,FBgn0260935,FBgn0259099,FBgn0031145,FBgn0027066,FBgn0000250,FBgn0260632,FBg…
GO:0007446	imaginal disc growth	biological_process	6.2766e-06	7.9306e-05	29	3767	46	12231	FBgn0263930,FBgn0032475,FBgn0263598,FBgn0003944,FBgn0030530,FBgn0003612,FBgn0038755,FBgn0004644,FBgn0020279,FBgn0053193,FBgn0052418,FBgn0010575,FBgn0259685,FBgn0267791,FBgn0263933,FBgn0000504,FBgn0015279,FBgn0041191,FBgn0004009,FBgn0263289,FBgn0039861,FBgn0011739,FBgn0011642,FBgn0002431,FBgn0001332,FBgn0001075,FBgn0028734,FBgn0020251,FBgn0000490
GO:0006914	autophagy	biological_process	6.3905e-06	8.0641e-05	53	3767	102	12231	FBgn0013269,FBgn0034646,FBgn0004177,FBgn0004436,FBgn0026323,FBgn0028582,FBgn0038197,FBgn0086687,FBgn0011300,FBgn0260439,FBgn0040475,FBgn0266717,FBgn0261479,FBgn0034476,FBgn0031461,FBgn0036813,FBgn0052672,FBgn0032499,FBgn0260749,FBgn0264357,FBgn0005198,FBgn0003943,FBgn0041100,FBgn0263198,FBgn0003256,FBgn0029891,FBgn0265988,FBgn0041191,FBgn0000567,FBgn0030600,FBgn0003507,FBgn0015279,FBgn0035850,FBg…
GO:0000988	transcription factor activity, protein binding	molecular_function	6.6516e-06	8.3827e-05	63	3767	127	12231	FBgn0027592,FBgn0002783,FBgn0000370,FBgn0039923,FBgn0037109,FBgn0020496,FBgn0011648,FBgn0035149,FBgn0039337,FBgn0022764,FBgn0040020,FBgn0262582,FBgn0042085,FBgn0261885,FBgn0011836,FBgn0039904,FBgn0033749,FBgn0261617,FBgn0038760,FBgn0001179,FBgn0035851,FBgn0011715,FBgn0261239,FBgn0263933,FBgn0003687,FBgn0261109,FBgn0030093,FBgn0026873,FBgn0034503,FBgn0033486,FBgn0010575,FBgn0039559,FBgn0023518,FBg…
GO:0035770	ribonucleoprotein granule	cellular_component	6.9638e-06	8.7648e-05	28	3767	44	12231	FBgn0020279,FBgn0250816,FBgn0000114,FBgn0263231,FBgn0036735,FBgn0016034,FBgn0267385,FBgn0041775,FBgn0003520,FBgn0263974,FBgn0266053,FBgn0261266,FBgn0261014,FBgn0015218,FBgn0028707,FBgn0004838,FBgn0004419,FBgn0262526,FBgn0016070,FBgn0036621,FBgn0020261,FBgn0032340,FBgn0052016,FBgn0000615,FBgn0034921,FBgn0003483,FBgn0051992,FBgn0262743
GO:0005509	calcium ion binding	molecular_function	7.1226e-06	8.9532e-05	94	3767	208	12231	FBgn0013303,FBgn0052190,FBgn0032643,FBgn0020224,FBgn0039380,FBgn0034558,FBgn0020908,FBgn0259140,FBgn0031879,FBgn0012051,FBgn0000253,FBgn0025682,FBgn0037358,FBgn0003218,FBgn0032731,FBgn0031692,FBgn0039634,FBgn0038257,FBgn0004197,FBgn0264089,FBgn0038735,FBgn0262738,FBgn0034180,FBgn0004169,FBgn0039140,FBgn0250862,FBgn0004242,FBgn0052702,FBgn0035060,FBgn0030973,FBgn0035539,FBgn0085428,FBgn0038439,FBg…
GO:0007306	eggshell chorion assembly	biological_process	7.4225e-06	9.3181e-05	45	3767	83	12231	FBgn0023423,FBgn0004650,FBgn0086695,FBgn0000307,FBgn0033846,FBgn0010382,FBgn0025815,FBgn0023509,FBgn0262582,FBgn0033260,FBgn0033081,FBgn0003392,FBgn0263979,FBgn0026238,FBgn0000250,FBgn0259176,FBgn0010303,FBgn0002914,FBgn0015799,FBgn0262526,FBgn0011763,FBgn0263987,FBgn0010341,FBgn0040207,FBgn0014343,FBgn0261285,FBgn0002926,FBgn0000996,FBgn0005655,FBgn0003870,FBgn0016034,FBgn0010235,FBgn0261266,FBg…
GO:0061174	type I terminal bouton	cellular_component	7.6311e-06	9.5677e-05	10	3767	10	12231	FBgn0020440,FBgn0001624,FBgn0040505,FBgn0260934,FBgn0000578,FBgn0004179,FBgn0053094,FBgn0003165,FBgn0086677,FBgn0050021
GO:0030017	sarcomere	cellular_component	7.667e-06	9.6005e-05	27	3767	42	12231	FBgn0026059,FBgn0003149,FBgn0034072,FBgn0250906,FBgn0265356,FBgn0053519,FBgn0004117,FBgn0038294,FBgn0000064,FBgn0265991,FBgn0019947,FBgn0027052,FBgn0014863,FBgn0265434,FBgn0086906,FBgn0004169,FBgn0035499,FBgn0261836,FBgn0001091,FBgn0035917,FBgn0036641,FBgn0004028,FBgn0086442,FBgn0041096,FBgn0005666,FBgn0000667,FBgn0264695
GO:0030951	establishment or maintenance of microtubule cytoskeleton polarity	biological_process	7.6911e-06	9.6183e-05	27	3767	42	12231	FBgn0000163,FBgn0263929,FBgn0040294,FBgn0016034,FBgn0259243,FBgn0000562,FBgn0261458,FBgn0086362,FBgn0021760,FBgn0261064,FBgn0000183,FBgn0002121,FBgn0001308,FBgn0000273,FBgn0000319,FBgn0027948,FBgn0260934,FBgn0004381,FBgn0086371,FBgn0038167,FBgn0004380,FBgn0015589,FBgn0027066,FBgn0261014,FBgn0020238,FBgn0263396,FBgn0015797
GO:0060322	head development	biological_process	7.7908e-06	9.7305e-05	73	3767	153	12231	FBgn0004635,FBgn0034012,FBgn0005771,FBgn0266572,FBgn0032059,FBgn0003984,FBgn0016797,FBgn0086359,FBgn0039861,FBgn0019650,FBgn0266098,FBgn0001235,FBgn0040324,FBgn0265998,FBgn0259168,FBgn0261985,FBgn0002873,FBgn0025936,FBgn0259176,FBgn0002932,FBgn0015589,FBgn0262733,FBgn0000546,FBgn0000042,FBgn0026375,FBgn0003870,FBgn0020617,FBgn0005630,FBgn0004644,FBgn0000448,FBgn0261446,FBgn0000547,FBgn0264975,FBg…
GO:0050804	modulation of synaptic transmission	biological_process	7.8609e-06	9.8055e-05	42	3767	76	12231	FBgn0262593,FBgn0024234,FBgn0263111,FBgn0004242,FBgn0065108,FBgn0039927,FBgn0038816,FBgn0030057,FBgn0036819,FBgn0003380,FBgn0015279,FBgn0264606,FBgn0040505,FBgn0259246,FBgn0034072,FBgn0019985,FBgn0016975,FBgn0003256,FBgn0010379,FBgn0020429,FBgn0027505,FBgn0027575,FBgn0053547,FBgn0261532,FBgn0030505,FBgn0000183,FBgn0030941,FBgn0260003,FBgn0264087,FBgn0033483,FBgn0000273,FBgn0010300,FBgn0039916,FBg…
GO:0001738	morphogenesis of a polarized epithelium	biological_process	8.0365e-06	0.00010012	58	3767	115	12231	FBgn0010303,FBgn0035719,FBgn0031903,FBgn0003392,FBgn0001624,FBgn0039532,FBgn0004009,FBgn0263289,FBgn0260934,FBgn0261617,FBgn0015615,FBgn0030395,FBgn0024836,FBgn0000097,FBgn0037671,FBgn0259685,FBgn0003651,FBgn0261064,FBgn0016977,FBgn0261854,FBgn0003053,FBgn0034049,FBgn0026192,FBgn0003310,FBgn0001108,FBgn0014863,FBgn0265434,FBgn0015919,FBgn0001075,FBgn0034408,FBgn0250823,FBgn0002121,FBgn0001259,FBg…
GO:0004843	ubiquitin-specific protease activity	molecular_function	8.4001e-06	0.00010451	26	3767	40	12231	FBgn0003023,FBgn0026738,FBgn0029763,FBgn0011327,FBgn0029853,FBgn0005632,FBgn0035593,FBgn0038862,FBgn0029819,FBgn0013717,FBgn0086346,FBgn0016756,FBgn0260936,FBgn0039214,FBgn0031187,FBgn0036180,FBgn0033738,FBgn0028476,FBgn0032214,FBgn0262166,FBgn0037734,FBgn0050421,FBgn0035402,FBgn0030366,FBgn0052479,FBgn0033916
GO:0002168	instar larval development	biological_process	9.3291e-06	0.00011593	38	3767	67	12231	FBgn0024509,FBgn0004197,FBgn0004644,FBgn0000711,FBgn0011225,FBgn0266756,FBgn0003371,FBgn0028992,FBgn0010452,FBgn0038341,FBgn0034728,FBgn0262125,FBgn0000490,FBgn0004396,FBgn0266671,FBgn0015279,FBgn0262467,FBgn0004924,FBgn0003319,FBgn0002121,FBgn0011661,FBgn0263231,FBgn0004635,FBgn0028969,FBgn0000562,FBgn0000543,FBgn0029117,FBgn0020493,FBgn0261238,FBgn0028968,FBgn0005640,FBgn0015589,FBgn0003079,FBg…
GO:0000989	transcription factor activity, transcription factor binding	molecular_function	9.4513e-06	0.0001172	59	3767	118	12231	FBgn0262582,FBgn0042085,FBgn0261885,FBgn0011836,FBgn0039904,FBgn0033749,FBgn0038760,FBgn0261617,FBgn0035851,FBgn0011715,FBgn0263933,FBgn0261239,FBgn0003687,FBgn0027592,FBgn0000370,FBgn0002783,FBgn0039923,FBgn0020496,FBgn0037109,FBgn0011648,FBgn0035149,FBgn0039337,FBgn0022764,FBgn0040020,FBgn0035145,FBgn0025463,FBgn0040339,FBgn0000212,FBgn0028387,FBgn0036374,FBgn0035677,FBgn0038742,FBgn0001169,FBg…
GO:0030031	cell projection assembly	biological_process	9.4623e-06	0.0001172	59	3767	118	12231	FBgn0000578,FBgn0011202,FBgn0004380,FBgn0035741,FBgn0085447,FBgn0028734,FBgn0031781,FBgn0000499,FBgn0011020,FBgn0038814,FBgn0003950,FBgn0033212,FBgn0023096,FBgn0264598,FBgn0003447,FBgn0033685,FBgn0031196,FBgn0004644,FBgn0003731,FBgn0000163,FBgn0265102,FBgn0034487,FBgn0025742,FBgn0020510,FBgn0010303,FBgn0003430,FBgn0038916,FBgn0037280,FBgn0032891,FBgn0036480,FBgn0032859,FBgn0033447,FBgn0026371,FBg…
GO:0003712	transcription cofactor activity	molecular_function	9.4677e-06	0.0001172	57	3767	113	12231	FBgn0038760,FBgn0261617,FBgn0035851,FBgn0011715,FBgn0263933,FBgn0261239,FBgn0039904,FBgn0261885,FBgn0033749,FBgn0262582,FBgn0042085,FBgn0039337,FBgn0022764,FBgn0040020,FBgn0035149,FBgn0011648,FBgn0027592,FBgn0000370,FBgn0002783,FBgn0039923,FBgn0037109,FBgn0020496,FBgn0038578,FBgn0265523,FBgn0043900,FBgn0263593,FBgn0001324,FBgn0037359,FBgn0034707,FBgn0082598,FBgn0010825,FBgn0010774,FBgn0035677,FBg…
GO:0031330	negative regulation of cellular catabolic process	biological_process	9.7969e-06	0.00012112	24	3767	36	12231	FBgn0086357,FBgn0027053,FBgn0013756,FBgn0003256,FBgn0035640,FBgn0015279,FBgn0041191,FBgn0266717,FBgn0003079,FBgn0027054,FBgn0011300,FBgn0000404,FBgn0003884,FBgn0044324,FBgn0031461,FBgn0026326,FBgn0021796,FBgn0010382,FBgn0025800,FBgn0003268,FBgn0013269,FBgn0259685,FBgn0000063,FBgn0061476
GO:0006259	DNA metabolic process	biological_process	9.8331e-06	0.00012142	112	3767	258	12231	FBgn0034878,FBgn0004924,FBgn0030871,FBgn0259676,FBgn0265193,FBgn0010173,FBgn0002905,FBgn0260987,FBgn0002887,FBgn0025463,FBgn0039226,FBgn0036486,FBgn0028700,FBgn0002183,FBgn0086683,FBgn0010328,FBgn0027375,FBgn0028406,FBgn0030082,FBgn0261109,FBgn0016054,FBgn0029798,FBgn0031885,FBgn0015553,FBgn0015546,FBgn0035769,FBgn0011606,FBgn0036843,FBgn0002622,FBgn0025682,FBgn0263600,FBgn0004698,FBgn0266282,FBg…
GO:0030705	cytoskeleton-dependent intracellular transport	biological_process	1.0229e-05	0.00012615	30	3767	49	12231	FBgn0030276,FBgn0261397,FBgn0001079,FBgn0011225,FBgn0024187,FBgn0023096,FBgn0032446,FBgn0267002,FBgn0001108,FBgn0039140,FBgn0265102,FBgn0013811,FBgn0001202,FBgn0040281,FBgn0000352,FBgn0030092,FBgn0033447,FBgn0259483,FBgn0003654,FBgn0004380,FBgn0266521,FBgn0011745,FBgn0040395,FBgn0267390,FBgn0035317,FBgn0027655,FBgn0004381,FBgn0259108,FBgn0015754,FBgn0001308
GO:0048754	branching morphogenesis of an epithelial tube	biological_process	1.0333e-05	0.00012686	34	3767	58	12231	FBgn0026192,FBgn0053556,FBgn0036844,FBgn0038755,FBgn0261854,FBgn0003254,FBgn0026207,FBgn0004009,FBgn0010341,FBgn0000382,FBgn0037917,FBgn0011642,FBgn0020299,FBgn0028968,FBgn0003169,FBgn0015019,FBgn0003079,FBgn0041171,FBgn0038916,FBgn0010350,FBgn0003870,FBgn0010113,FBgn0003118,FBgn0001311,FBgn0000163,FBgn0024236,FBgn0266465,FBgn0014388,FBgn0000547,FBgn0011739,FBgn0010452,FBgn0264785,FBgn0020251,FBg…
GO:0060446	branching involved in open tracheal system development	biological_process	1.0333e-05	0.00012686	34	3767	58	12231	FBgn0011739,FBgn0014388,FBgn0000547,FBgn0020251,FBgn0264785,FBgn0000490,FBgn0010452,FBgn0010113,FBgn0003118,FBgn0001311,FBgn0000163,FBgn0010350,FBgn0003870,FBgn0266465,FBgn0024236,FBgn0037917,FBgn0011642,FBgn0020299,FBgn0010341,FBgn0004009,FBgn0000382,FBgn0003169,FBgn0015019,FBgn0003079,FBgn0041171,FBgn0038916,FBgn0028968,FBgn0026192,FBgn0053556,FBgn0036844,FBgn0003254,FBgn0026207,FBgn0038755,FBg…
GO:0061138	morphogenesis of a branching epithelium	biological_process	1.0333e-05	0.00012686	34	3767	58	12231	FBgn0266465,FBgn0024236,FBgn0000163,FBgn0001311,FBgn0010113,FBgn0003118,FBgn0010350,FBgn0003870,FBgn0000490,FBgn0264785,FBgn0020251,FBgn0010452,FBgn0011739,FBgn0000547,FBgn0014388,FBgn0003254,FBgn0026207,FBgn0261854,FBgn0038755,FBgn0036844,FBgn0053556,FBgn0026192,FBgn0038916,FBgn0041171,FBgn0015019,FBgn0003079,FBgn0003169,FBgn0028968,FBgn0020299,FBgn0011642,FBgn0037917,FBgn0004009,FBgn0010341,FBg…
GO:0042706	eye photoreceptor cell fate commitment	biological_process	1.0339e-05	0.00012686	34	3767	58	12231	FBgn0003118,FBgn0041184,FBgn0003731,FBgn0004177,FBgn0010433,FBgn0004858,FBgn0005630,FBgn0261456,FBgn0053193,FBgn0005561,FBgn0004644,FBgn0011739,FBgn0003256,FBgn0000499,FBgn0016794,FBgn0003410,FBgn0034049,FBgn0004638,FBgn0020224,FBgn0005771,FBgn0024836,FBgn0000097,FBgn0003651,FBgn0001233,FBgn0000206,FBgn0010269,FBgn0263289,FBgn0000382,FBgn0001235,FBgn0261617,FBgn0001168,FBgn0001965,FBgn0017590,FBg…
GO:0000122	negative regulation of transcription from RNA polymerase II promoter	biological_process	1.0364e-05	0.00012701	73	3767	154	12231	FBgn0002733,FBgn0029800,FBgn0001139,FBgn0038197,FBgn0003870,FBgn0014343,FBgn0010575,FBgn0002576,FBgn0085450,FBgn0030082,FBgn0038872,FBgn0000448,FBgn0000504,FBgn0010416,FBgn0264442,FBgn0004360,FBgn0035357,FBgn0002985,FBgn0000097,FBgn0020496,FBgn0002573,FBgn0020307,FBgn0004606,FBgn0023076,FBgn0259938,FBgn0000018,FBgn0028926,FBgn0040318,FBgn0040273,FBgn0003028,FBgn0015799,FBgn0262582,FBgn0023509,FBg…
[truncated: 7,222 more rows]

## Sheet: GO terms with DE lncRNA_Cag_Que
Enriched GO terms for DE lncRNAs in oviposition inhibition process
GO_accession	Description	Term_type	Over_represented_pValue	Corrected_pValue	DEG_item	DEG_list	Bg_item	Bg_list	Gene_names
[truncated: 6,487 more rows]

## Sheet: GO terms with DE lncRNA_Rel_Cag
Enriched GO terms for DE lncRNAs in oviposition recovery process
GO_accession	Description	Term_type	Over_represented_pValue	Corrected_pValue	DEG_item	DEG_list	Bg_item	Bg_list	Gene_names
[truncated: 6,813 more rows]

## Sheet: Pathways with DE lncRNA_Que_Vir
Enriched KEGG pathways for DE lncRNAs in ovary activation process
[truncated: 118 more rows]

## Sheet: Pathways with DE lncRNA_Cag_Que
Enriched KEGG pathways for DE lncRNAs in oviposition inhibition process
[truncated: 116 more rows]

[truncated: 1 more sheets: Pathways with DE lncRNA_Rel_Cag]
