# Supplementary material for: Integration of lncRNA–miRNA–mRNA reveals novel insights into oviposition regulation in honey bees
Source: PeerJ. 2017 Oct 5;5:e3881. doi: 10.7717/peerj.3881 (PMC5632538; doi:10.7717/peerj.3881)
Supplement: Table S5 [file peerj-05-3881-s005.xlsx]

## Sheet: GO terms_Que_Vir
Enriched GO terms for DE miRNAs in ovary activation process
GO_accession	Description	Term_type	Over_represented_pValue	Corrected_pValue	DEG_item	DEG_list	Bg_item	Bg_list	Gene_names
GO:0048513	organ development	biological_process	4.7125e-25	4.6027e-21	86	259	1228	12231	FBgn0267727,FBgn0004885,FBgn0262139,FBgn0005630,FBgn0028704,FBgn0025936,FBgn0038197,FBgn0263706,FBgn0010575,FBgn0261963,FBgn0001320,FBgn0045852,FBgn0086898,FBgn0003499,FBgn0034070,FBgn0011826,FBgn0013469,FBgn0023407,FBgn0031903,FBgn0000633,FBgn0014343,FBgn0264272,FBgn0000179,FBgn0003382,FBgn0085432,FBgn0003175,FBgn0015600,FBgn0005677,FBgn0000448,FBgn0264693,FBgn0029157,FBgn0000244,FBgn0033791,FBg…
GO:0009653	anatomical structure morphogenesis	biological_process	7.8636e-24	3.8402e-20	100	259	1692	12231	FBgn0086898,FBgn0045852,FBgn0001320,FBgn0013469,FBgn0034070,FBgn0039709,FBgn0003499,FBgn0263706,FBgn0038197,FBgn0025936,FBgn0005630,FBgn0028704,FBgn0005624,FBgn0262139,FBgn0004885,FBgn0267727,FBgn0041092,FBgn0261963,FBgn0010575,FBgn0033791,FBgn0000497,FBgn0000244,FBgn0040271,FBgn0029157,FBgn0000448,FBgn0004449,FBgn0260397,FBgn0260660,FBgn0000114,FBgn0011481,FBgn0041111,FBgn0020307,FBgn0020299,FBg…
GO:0048731	system development	biological_process	1.832e-23	5.9645e-20	115	259	2199	12231	FBgn0024288,FBgn0082585,FBgn0041604,FBgn0262509,FBgn0003118,FBgn0003392,FBgn0015919,FBgn0264442,FBgn0000413,FBgn0032388,FBgn0038975,FBgn0033504,FBgn0011817,FBgn0004878,FBgn0262975,FBgn0010470,FBgn0005636,FBgn0264089,FBgn0004635,FBgn0040318,FBgn0025631,FBgn0261563,FBgn0264607,FBgn0038498,FBgn0004360,FBgn0261451,FBgn0000210,FBgn0259685,FBgn0032194,FBgn0023172,FBgn0001624,FBgn0001138,FBgn0000299,FBg…
GO:0065007	biological regulation	biological_process	6.9949e-23	1.708e-19	144	259	3304	12231	FBgn0028369,FBgn0004859,FBgn0260753,FBgn0263111,FBgn0000108,FBgn0038826,FBgn0020309,FBgn0029881,FBgn0264695,FBgn0052666,FBgn0262477,FBgn0001075,FBgn0267791,FBgn0004795,FBgn0004587,FBgn0261723,FBgn0086901,FBgn0025631,FBgn0261563,FBgn0004360,FBgn0264607,FBgn0023172,FBgn0001138,FBgn0023091,FBgn0003118,FBgn0015919,FBgn0011817,FBgn0038975,FBgn0032388,FBgn0264442,FBgn0262975,FBgn0004878,FBgn0264089,FBg…
GO:0050789	regulation of biological process	biological_process	2.3984e-22	4.685e-19	136	259	3031	12231	FBgn0053531,FBgn0000179,FBgn0000182,FBgn0005677,FBgn0038837,FBgn0085432,FBgn0029791,FBgn0040271,FBgn0029157,FBgn0013531,FBgn0264693,FBgn0004914,FBgn0260660,FBgn0261929,FBgn0011481,FBgn0020299,FBgn0025936,FBgn0025639,FBgn0263706,FBgn0028397,FBgn0005624,FBgn0005630,FBgn0041092,FBgn0004885,FBgn0263397,FBgn0013995,FBgn0043070,FBgn0052082,FBgn0264815,FBgn0003499,FBgn0037766,FBgn0261723,FBgn0086901,FBg…
GO:0050794	regulation of cellular process	biological_process	4.756e-21	7.742e-18	128	259	2820	12231	FBgn0020309,FBgn0029881,FBgn0038826,FBgn0260753,FBgn0263111,FBgn0000108,FBgn0004859,FBgn0028369,FBgn0004587,FBgn0004795,FBgn0086901,FBgn0261723,FBgn0052666,FBgn0267791,FBgn0262477,FBgn0001075,FBgn0001138,FBgn0023172,FBgn0264607,FBgn0004360,FBgn0025631,FBgn0261563,FBgn0264089,FBgn0264442,FBgn0038975,FBgn0032388,FBgn0011817,FBgn0004878,FBgn0262975,FBgn0015919,FBgn0023091,FBgn0003118,FBgn0264693,FBg…
GO:0009888	tissue development	biological_process	5.6653e-21	7.9047e-18	76	259	1124	12231	FBgn0264272,FBgn0000179,FBgn0039704,FBgn0014343,FBgn0000633,FBgn0031903,FBgn0000182,FBgn0023407,FBgn0005677,FBgn0015600,FBgn0085432,FBgn0003175,FBgn0003382,FBgn0000497,FBgn0000244,FBgn0264693,FBgn0004914,FBgn0260397,FBgn0000114,FBgn0041111,FBgn0011481,FBgn0020307,FBgn0020299,FBgn0263706,FBgn0038197,FBgn0005630,FBgn0262139,FBgn0004885,FBgn0041092,FBgn0261963,FBgn0010575,FBgn0086898,FBgn0001320,FBg…
GO:0009887	organ morphogenesis	biological_process	2.3205e-20	2.833e-17	62	259	783	12231	FBgn0003392,FBgn0015919,FBgn0010575,FBgn0041604,FBgn0003118,FBgn0010470,FBgn0005630,FBgn0264089,FBgn0004635,FBgn0263706,FBgn0038197,FBgn0005636,FBgn0011817,FBgn0264442,FBgn0004885,FBgn0000413,FBgn0262139,FBgn0000210,FBgn0013469,FBgn0259685,FBgn0034070,FBgn0261563,FBgn0001138,FBgn0000299,FBgn0260003,FBgn0086898,FBgn0003117,FBgn0023172,FBgn0001624,FBgn0262738,FBgn0052666,FBgn0267336,FBgn0001075,FBg…
GO:0005515	protein binding	molecular_function	2.7292e-19	2.9618e-16	130	259	3026	12231	FBgn0000244,FBgn0000448,FBgn0028481,FBgn0000497,FBgn0031725,FBgn0051163,FBgn0262869,FBgn0040752,FBgn0260397,FBgn0004449,FBgn0263873,FBgn0029824,FBgn0000114,FBgn0264707,FBgn0083975,FBgn0028645,FBgn0265296,FBgn0264272,FBgn0014343,FBgn0031903,FBgn0010407,FBgn0259234,FBgn0027596,FBgn0264001,FBgn0259099,FBgn0001320,FBgn0086898,FBgn0034070,FBgn0039709,FBgn0011826,FBgn0262139,FBgn0051619,FBgn0039920,FBg…
GO:0044707	single-multicellular organism process	biological_process	3.0959e-19	3.0238e-16	137	259	3305	12231	FBgn0010575,FBgn0261963,FBgn0033494,FBgn0262139,FBgn0038197,FBgn0034070,FBgn0011826,FBgn0013469,FBgn0001320,FBgn0045852,FBgn0086898,FBgn0003175,FBgn0027596,FBgn0259099,FBgn0028645,FBgn0083975,FBgn0023407,FBgn0031903,FBgn0010407,FBgn0026189,FBgn0039704,FBgn0014343,FBgn0265296,FBgn0264272,FBgn0040752,FBgn0020307,FBgn0051163,FBgn0041111,FBgn0000114,FBgn0260397,FBgn0004449,FBgn0000448,FBgn0000244,FBg…
GO:0048699	generation of neurons	biological_process	4.0109e-19	3.5613e-16	63	259	854	12231	FBgn0086898,FBgn0001138,FBgn0045852,FBgn0001320,FBgn0023172,FBgn0001624,FBgn0259685,FBgn0038498,FBgn0000210,FBgn0261451,FBgn0013469,FBgn0004360,FBgn0034070,FBgn0005636,FBgn0038197,FBgn0264089,FBgn0040318,FBgn0025936,FBgn0004635,FBgn0005630,FBgn0028704,FBgn0005624,FBgn0004878,FBgn0262975,FBgn0262139,FBgn0004885,FBgn0264442,FBgn0000413,FBgn0041092,FBgn0003118,FBgn0261963,FBgn0010575,FBgn0262509,FBg…
GO:0030030	cell projection organization	biological_process	4.9466e-19	4.0261e-16	56	259	684	12231	FBgn0038498,FBgn0264607,FBgn0261451,FBgn0004360,FBgn0000210,FBgn0259685,FBgn0039709,FBgn0001138,FBgn0045852,FBgn0086898,FBgn0023172,FBgn0052082,FBgn0001320,FBgn0010575,FBgn0041604,FBgn0261963,FBgn0005630,FBgn0028704,FBgn0005624,FBgn0005636,FBgn0038197,FBgn0264089,FBgn0025936,FBgn0004635,FBgn0264442,FBgn0004885,FBgn0041092,FBgn0262975,FBgn0262139,FBgn0004859,FBgn0260660,FBgn0004449,FBgn0011481,FBg…
GO:0030182	neuron differentiation	biological_process	7.3685e-19	5.536e-16	60	259	788	12231	FBgn0261963,FBgn0003118,FBgn0010575,FBgn0262509,FBgn0041604,FBgn0004635,FBgn0264089,FBgn0040318,FBgn0025936,FBgn0005636,FBgn0038197,FBgn0005624,FBgn0028704,FBgn0005630,FBgn0262139,FBgn0262975,FBgn0041092,FBgn0264442,FBgn0004885,FBgn0000413,FBgn0259685,FBgn0261451,FBgn0000210,FBgn0004360,FBgn0038498,FBgn0034070,FBgn0086898,FBgn0045852,FBgn0001138,FBgn0001320,FBgn0023172,FBgn0005677,FBgn0001075,FBg…
GO:0007275	multicellular organismal development	biological_process	8.4222e-19	5.8757e-16	122	259	2759	12231	FBgn0010470,FBgn0264089,FBgn0004635,FBgn0040318,FBgn0005636,FBgn0038975,FBgn0032388,FBgn0033504,FBgn0011817,FBgn0000413,FBgn0264442,FBgn0262975,FBgn0004878,FBgn0003392,FBgn0015919,FBgn0262509,FBgn0041604,FBgn0024288,FBgn0082585,FBgn0003118,FBgn0000299,FBgn0001138,FBgn0003117,FBgn0260003,FBgn0023172,FBgn0001624,FBgn0004360,FBgn0261451,FBgn0000210,FBgn0038498,FBgn0264607,FBgn0032194,FBgn0259685,FBg…
GO:0048856	anatomical structure development	biological_process	3.4925e-18	2.2741e-15	127	259	2997	12231	FBgn0004859,FBgn0261570,FBgn0265991,FBgn0019650,FBgn0261260,FBgn0028369,FBgn0032252,FBgn0038826,FBgn0020309,FBgn0029881,FBgn0265356,FBgn0086758,FBgn0001139,FBgn0263111,FBgn0025391,FBgn0000108,FBgn0262738,FBgn0267336,FBgn0004509,FBgn0052666,FBgn0001075,FBgn0267791,FBgn0039932,FBgn0085408,FBgn0264695,FBgn0004795,FBgn0261723,FBgn0266098,FBgn0001319,FBgn0086901,FBgn0000479,FBgn0004606,FBgn0000210,FBg…
GO:0032502	developmental process	biological_process	1.5987e-17	9.7591e-15	134	259	3327	12231	FBgn0028990,FBgn0261260,FBgn0019650,FBgn0261570,FBgn0051612,FBgn0025391,FBgn0001139,FBgn0038880,FBgn0086758,FBgn0265356,FBgn0032252,FBgn0085408,FBgn0086613,FBgn0039932,FBgn0004509,FBgn0262738,FBgn0004606,FBgn0000479,FBgn0001319,FBgn0266098,FBgn0259685,FBgn0038498,FBgn0261451,FBgn0000210,FBgn0264490,FBgn0001624,FBgn0003117,FBgn0260003,FBgn0024288,FBgn0082585,FBgn0262509,FBgn0041604,FBgn0003392,FBg…
GO:0032989	cellular component morphogenesis	biological_process	1.8517e-17	1.0638e-14	61	259	869	12231	FBgn0039709,FBgn0038498,FBgn0261451,FBgn0004360,FBgn0000210,FBgn0259685,FBgn0023172,FBgn0001320,FBgn0001138,FBgn0045852,FBgn0010575,FBgn0041604,FBgn0261963,FBgn0003392,FBgn0004885,FBgn0264442,FBgn0041092,FBgn0262975,FBgn0262139,FBgn0005630,FBgn0028704,FBgn0005624,FBgn0038197,FBgn0005636,FBgn0264089,FBgn0025936,FBgn0004635,FBgn0265991,FBgn0011481,FBgn0004859,FBgn0260660,FBgn0004449,FBgn0086758,FBg…
GO:0000904	cell morphogenesis involved in differentiation	biological_process	2.0312e-17	1.1022e-14	46	259	506	12231	FBgn0038197,FBgn0005636,FBgn0264089,FBgn0025936,FBgn0004635,FBgn0005630,FBgn0005624,FBgn0262975,FBgn0262139,FBgn0264442,FBgn0004885,FBgn0041092,FBgn0261963,FBgn0010575,FBgn0041604,FBgn0001138,FBgn0045852,FBgn0001320,FBgn0023172,FBgn0259685,FBgn0038498,FBgn0004360,FBgn0261451,FBgn0000210,FBgn0086901,FBgn0264272,FBgn0001319,FBgn0261723,FBgn0014343,FBgn0039704,FBgn0004795,FBgn0004606,FBgn0000479,FBg…
GO:0060429	epithelium development	biological_process	2.1551e-17	1.1079e-14	66	259	1007	12231	FBgn0086758,FBgn0038826,FBgn0020309,FBgn0029881,FBgn0019650,FBgn0261570,FBgn0004859,FBgn0086901,FBgn0001319,FBgn0085408,FBgn0264695,FBgn0039932,FBgn0001075,FBgn0267791,FBgn0052666,FBgn0267336,FBgn0023172,FBgn0001624,FBgn0260003,FBgn0003117,FBgn0000299,FBgn0261563,FBgn0259685,FBgn0011817,FBgn0264442,FBgn0000413,FBgn0004635,FBgn0264089,FBgn0010470,FBgn0003118,FBgn0041604,FBgn0015919,FBgn0003392,FBg…
GO:0005488	binding	molecular_function	2.4963e-17	1.219e-14	189	259	5816	12231	FBgn0261090,FBgn0039920,FBgn0038197,FBgn0259213,FBgn0262139,FBgn0000559,FBgn0051619,FBgn0031374,FBgn0263980,FBgn0261963,FBgn0010575,FBgn0086898,FBgn0045852,FBgn0250819,FBgn0001320,FBgn0013469,FBgn0011826,FBgn0034070,FBgn0085390,FBgn0039709,FBgn0014343,FBgn0264272,FBgn0265296,FBgn0259234,FBgn0010407,FBgn0031903,FBgn0264707,FBgn0083975,FBgn0028645,FBgn0050147,FBgn0259099,FBgn0015032,FBgn0264001,FBg…
GO:0035295	tube development	biological_process	2.6865e-17	1.2495e-14	57	259	772	12231	FBgn0005630,FBgn0010470,FBgn0038197,FBgn0263706,FBgn0004635,FBgn0264089,FBgn0264442,FBgn0000413,FBgn0004885,FBgn0011817,FBgn0262975,FBgn0262139,FBgn0015919,FBgn0041604,FBgn0010575,FBgn0003118,FBgn0261963,FBgn0000299,FBgn0086898,FBgn0260003,FBgn0003117,FBgn0023172,FBgn0001624,FBgn0011826,FBgn0259685,FBgn0261563,FBgn0031903,FBgn0000633,FBgn0000179,FBgn0264272,FBgn0086901,FBgn0001319,FBgn0014343,FBg…
GO:0044767	single-organism developmental process	biological_process	4.4401e-17	1.9712e-14	132	259	3285	12231	FBgn0041092,FBgn0267727,FBgn0004885,FBgn0025936,FBgn0263706,FBgn0005624,FBgn0028704,FBgn0005630,FBgn0003499,FBgn0000557,FBgn0263397,FBgn0085432,FBgn0015600,FBgn0003382,FBgn0005677,FBgn0000182,FBgn0264908,FBgn0000179,FBgn0000633,FBgn0011481,FBgn0020299,FBgn0260660,FBgn0029157,FBgn0040271,FBgn0264693,FBgn0003118,FBgn0015919,FBgn0262975,FBgn0004878,FBgn0038975,FBgn0032388,FBgn0011817,FBgn0264442,FBg…
GO:0032501	multicellular organismal process	biological_process	7.4288e-17	3.1547e-14	143	259	3755	12231	FBgn0259685,FBgn0038498,FBgn0261451,FBgn0000210,FBgn0001624,FBgn0003117,FBgn0260003,FBgn0082585,FBgn0024288,FBgn0041604,FBgn0262509,FBgn0003392,FBgn0053481,FBgn0000413,FBgn0033504,FBgn0005636,FBgn0040318,FBgn0004635,FBgn0032593,FBgn0010470,FBgn0086675,FBgn0266418,FBgn0019650,FBgn0261260,FBgn0028990,FBgn0261570,FBgn0025391,FBgn0038880,FBgn0001139,FBgn0086758,FBgn0265356,FBgn0032252,FBgn0039932,FBg…
GO:0048812	neuron projection morphogenesis	biological_process	1.1454e-16	4.6614e-14	47	259	552	12231	FBgn0086758,FBgn0040271,FBgn0029157,FBgn0001139,FBgn0000108,FBgn0033791,FBgn0011481,FBgn0260660,FBgn0004859,FBgn0004449,FBgn0028645,FBgn0000479,FBgn0004606,FBgn0004795,FBgn0026189,FBgn0014343,FBgn0261723,FBgn0086901,FBgn0265296,FBgn0001319,FBgn0027596,FBgn0005677,FBgn0023172,FBgn0001320,FBgn0045852,FBgn0001138,FBgn0261451,FBgn0000210,FBgn0004360,FBgn0038498,FBgn0259685,FBgn0041092,FBgn0004885,FBg…
GO:0023052	signaling	biological_process	2.0708e-16	7.7144e-14	86	259	1664	12231	FBgn0020299,FBgn0261929,FBgn0260660,FBgn0004914,FBgn0260397,FBgn0000448,FBgn0039928,FBgn0040271,FBgn0033791,FBgn0035849,FBgn0085432,FBgn0029791,FBgn0259099,FBgn0038837,FBgn0083975,FBgn0264707,FBgn0010407,FBgn0031903,FBgn0259234,FBgn0264272,FBgn0014343,FBgn0053531,FBgn0039709,FBgn0003499,FBgn0000036,FBgn0085390,FBgn0264815,FBgn0013469,FBgn0052082,FBgn0052843,FBgn0043070,FBgn0013995,FBgn0010575,FBg…
GO:0044700	single organism signaling	biological_process	2.0708e-16	7.7144e-14	86	259	1664	12231	FBgn0039928,FBgn0040271,FBgn0000448,FBgn0035849,FBgn0033791,FBgn0020299,FBgn0004914,FBgn0260397,FBgn0261929,FBgn0260660,FBgn0264707,FBgn0083975,FBgn0264272,FBgn0053531,FBgn0014343,FBgn0010407,FBgn0031903,FBgn0259234,FBgn0085432,FBgn0029791,FBgn0038837,FBgn0259099,FBgn0052082,FBgn0052843,FBgn0043070,FBgn0013995,FBgn0264815,FBgn0003499,FBgn0039709,FBgn0085390,FBgn0000036,FBgn0013469,FBgn0262139,FBg…
GO:0048666	neuron development	biological_process	2.1413e-16	7.7144e-14	52	259	681	12231	FBgn0045852,FBgn0001138,FBgn0023172,FBgn0001320,FBgn0261451,FBgn0000210,FBgn0004360,FBgn0038498,FBgn0259685,FBgn0034070,FBgn0005624,FBgn0028704,FBgn0005630,FBgn0025936,FBgn0264089,FBgn0004635,FBgn0005636,FBgn0038197,FBgn0041092,FBgn0264442,FBgn0004885,FBgn0262139,FBgn0262975,FBgn0262509,FBgn0010575,FBgn0041604,FBgn0003118,FBgn0261963,FBgn0033791,FBgn0086758,FBgn0040271,FBgn0029157,FBgn0001139,FBg…
GO:0035107	appendage morphogenesis	biological_process	2.2116e-16	7.7144e-14	40	259	407	12231	FBgn0015919,FBgn0003118,FBgn0010575,FBgn0041604,FBgn0038197,FBgn0263706,FBgn0004635,FBgn0005630,FBgn0010470,FBgn0004885,FBgn0264442,FBgn0011817,FBgn0261563,FBgn0086898,FBgn0260003,FBgn0023172,FBgn0267791,FBgn0005677,FBgn0001075,FBgn0052666,FBgn0267336,FBgn0015600,FBgn0085432,FBgn0003175,FBgn0003382,FBgn0039932,FBgn0000179,FBgn0264272,FBgn0001319,FBgn0086901,FBgn0014343,FBgn0031903,FBgn0260397,FBg…
GO:0031175	neuron projection development	biological_process	2.3015e-16	7.7512e-14	47	259	562	12231	FBgn0001138,FBgn0045852,FBgn0023172,FBgn0001320,FBgn0038498,FBgn0261451,FBgn0004360,FBgn0000210,FBgn0259685,FBgn0028704,FBgn0005630,FBgn0005624,FBgn0005636,FBgn0038197,FBgn0025936,FBgn0264089,FBgn0004635,FBgn0264442,FBgn0004885,FBgn0041092,FBgn0262975,FBgn0262139,FBgn0041604,FBgn0010575,FBgn0261963,FBgn0033791,FBgn0086758,FBgn0000108,FBgn0001139,FBgn0029157,FBgn0040271,FBgn0004859,FBgn0260660,FBg…
GO:0007476	imaginal disc-derived wing morphogenesis	biological_process	2.6163e-16	8.5179e-14	37	259	348	12231	FBgn0267336,FBgn0052666,FBgn0001075,FBgn0039932,FBgn0003382,FBgn0015600,FBgn0085432,FBgn0003175,FBgn0031903,FBgn0086901,FBgn0264272,FBgn0001319,FBgn0000179,FBgn0014343,FBgn0000114,FBgn0261570,FBgn0260397,FBgn0020307,FBgn0000497,FBgn0020309,FBgn0086758,FBgn0000244,FBgn0015919,FBgn0010575,FBgn0041604,FBgn0003118,FBgn0005630,FBgn0010470,FBgn0038197,FBgn0004635,FBgn0004885,FBgn0264442,FBgn0011817,FBg…
GO:0048468	cell development	biological_process	3.0021e-16	9.4511e-14	78	259	1419	12231	FBgn0025631,FBgn0259685,FBgn0038498,FBgn0000210,FBgn0004360,FBgn0261451,FBgn0264490,FBgn0023172,FBgn0001624,FBgn0001138,FBgn0003118,FBgn0041604,FBgn0262509,FBgn0003392,FBgn0004878,FBgn0262975,FBgn0000413,FBgn0264442,FBgn0005636,FBgn0004635,FBgn0264089,FBgn0265991,FBgn0004859,FBgn0000108,FBgn0025391,FBgn0001139,FBgn0086758,FBgn0265356,FBgn0029881,FBgn0038826,FBgn0264695,FBgn0001075,FBgn0004509,FBg…
GO:0048736	appendage development	biological_process	3.0965e-16	9.4511e-14	40	259	411	12231	FBgn0260003,FBgn0086898,FBgn0023172,FBgn0261563,FBgn0005630,FBgn0010470,FBgn0038197,FBgn0263706,FBgn0004635,FBgn0004885,FBgn0264442,FBgn0011817,FBgn0015919,FBgn0010575,FBgn0041604,FBgn0003118,FBgn0000497,FBgn0020309,FBgn0086758,FBgn0000244,FBgn0000114,FBgn0261570,FBgn0260397,FBgn0020307,FBgn0031903,FBgn0264272,FBgn0086901,FBgn0001319,FBgn0000179,FBgn0014343,FBgn0052666,FBgn0267336,FBgn0267791,FBg…
GO:0007472	wing disc morphogenesis	biological_process	4.5552e-16	1.3482e-13	37	259	354	12231	FBgn0023172,FBgn0260003,FBgn0086898,FBgn0261563,FBgn0011817,FBgn0004885,FBgn0264442,FBgn0010470,FBgn0005630,FBgn0004635,FBgn0038197,FBgn0041604,FBgn0010575,FBgn0003118,FBgn0015919,FBgn0086758,FBgn0000244,FBgn0000497,FBgn0020309,FBgn0020307,FBgn0000114,FBgn0260397,FBgn0261570,FBgn0031903,FBgn0014343,FBgn0264272,FBgn0001319,FBgn0000179,FBgn0086901,FBgn0003382,FBgn0039932,FBgn0085432,FBgn0003175,FBg…
GO:0044699	single-organism process	biological_process	6.5014e-16	1.8676e-13	201	259	6591	12231	FBgn0263397,FBgn0043070,FBgn0013995,FBgn0051634,FBgn0034067,FBgn0052082,FBgn0034286,FBgn0000557,FBgn0264815,FBgn0037766,FBgn0003499,FBgn0025639,FBgn0263706,FBgn0025936,FBgn0000024,FBgn0028704,FBgn0005630,FBgn0028397,FBgn0005624,FBgn0019968,FBgn0030558,FBgn0030872,FBgn0004885,FBgn0041092,FBgn0267727,FBgn0030723,FBgn0259822,FBgn0029974,FBgn0039928,FBgn0029157,FBgn0040271,FBgn0264693,FBgn0004914,FBg…
GO:0007154	cell communication	biological_process	8.4004e-16	2.3442e-13	86	259	1703	12231	FBgn0001075,FBgn0262738,FBgn0039054,FBgn0039932,FBgn0001319,FBgn0086901,FBgn0041723,FBgn0000479,FBgn0259145,FBgn0261570,FBgn0051612,FBgn0004859,FBgn0266418,FBgn0028990,FBgn0020309,FBgn0029881,FBgn0263111,FBgn0039260,FBgn0001139,FBgn0038880,FBgn0260753,FBgn0262562,FBgn0003392,FBgn0261573,FBgn0003118,FBgn0041604,FBgn0023091,FBgn0004842,FBgn0004635,FBgn0264089,FBgn0010470,FBgn0038975,FBgn0011817,FBg…
GO:0035114	imaginal disc-derived appendage morphogenesis	biological_process	9.9522e-16	2.7001e-13	39	259	404	12231	FBgn0086898,FBgn0260003,FBgn0023172,FBgn0261563,FBgn0038197,FBgn0263706,FBgn0004635,FBgn0005630,FBgn0010470,FBgn0004885,FBgn0264442,FBgn0011817,FBgn0015919,FBgn0003118,FBgn0010575,FBgn0041604,FBgn0020309,FBgn0000497,FBgn0000244,FBgn0086758,FBgn0261570,FBgn0260397,FBgn0000114,FBgn0020307,FBgn0264272,FBgn0086901,FBgn0001319,FBgn0000179,FBgn0014343,FBgn0031903,FBgn0001075,FBgn0005677,FBgn0052666,FBg…
GO:0000902	cell morphogenesis	biological_process	1.057e-15	2.7903e-13	54	259	759	12231	FBgn0045852,FBgn0001138,FBgn0023172,FBgn0001320,FBgn0004360,FBgn0261451,FBgn0000210,FBgn0038498,FBgn0259685,FBgn0005624,FBgn0005630,FBgn0028704,FBgn0025936,FBgn0264089,FBgn0004635,FBgn0005636,FBgn0038197,FBgn0041092,FBgn0264442,FBgn0004885,FBgn0262139,FBgn0262975,FBgn0041604,FBgn0010575,FBgn0261963,FBgn0000497,FBgn0033791,FBgn0029881,FBgn0086758,FBgn0001139,FBgn0040271,FBgn0029157,FBgn0000108,FBg…
GO:0048569	post-embryonic organ development	biological_process	1.1395e-15	2.9288e-13	43	259	493	12231	FBgn0020309,FBgn0000497,FBgn0032252,FBgn0000244,FBgn0086758,FBgn0261570,FBgn0260397,FBgn0000114,FBgn0028369,FBgn0020307,FBgn0264272,FBgn0001319,FBgn0086901,FBgn0000179,FBgn0014343,FBgn0031903,FBgn0001075,FBgn0005677,FBgn0267336,FBgn0052666,FBgn0015600,FBgn0003175,FBgn0085432,FBgn0003382,FBgn0039932,FBgn0260003,FBgn0086898,FBgn0001624,FBgn0023172,FBgn0261563,FBgn0038197,FBgn0263706,FBgn0004635,FBg…
GO:0048737	imaginal disc-derived appendage development	biological_process	1.3823e-15	3.4617e-13	39	259	408	12231	FBgn0041604,FBgn0010575,FBgn0003118,FBgn0015919,FBgn0011817,FBgn0004885,FBgn0264442,FBgn0010470,FBgn0005630,FBgn0004635,FBgn0038197,FBgn0263706,FBgn0261563,FBgn0023172,FBgn0086898,FBgn0260003,FBgn0003382,FBgn0039932,FBgn0003175,FBgn0085432,FBgn0015600,FBgn0052666,FBgn0267336,FBgn0001075,FBgn0005677,FBgn0031903,FBgn0014343,FBgn0264272,FBgn0001319,FBgn0086901,FBgn0000179,FBgn0020307,FBgn0000114,FBg…
GO:0010468	regulation of gene expression	biological_process	1.6621e-15	4.0584e-13	65	259	1070	12231	FBgn0261963,FBgn0010575,FBgn0039920,FBgn0038197,FBgn0025639,FBgn0005630,FBgn0005624,FBgn0262139,FBgn0004885,FBgn0041092,FBgn0003499,FBgn0045852,FBgn0001320,FBgn0005677,FBgn0264001,FBgn0085432,FBgn0000179,FBgn0014343,FBgn0031903,FBgn0259234,FBgn0000182,FBgn0004914,FBgn0260397,FBgn0000114,FBgn0041111,FBgn0011481,FBgn0020307,FBgn0035849,FBgn0013531,FBgn0000448,FBgn0015919,FBgn0003118,FBgn0261573,FBg…
GO:0060562	epithelial tube morphogenesis	biological_process	1.8972e-15	4.5196e-13	44	259	523	12231	FBgn0015919,FBgn0003118,FBgn0041604,FBgn0010575,FBgn0004635,FBgn0038197,FBgn0263706,FBgn0010470,FBgn0005630,FBgn0262139,FBgn0011817,FBgn0004885,FBgn0264442,FBgn0259685,FBgn0261563,FBgn0260003,FBgn0086898,FBgn0023172,FBgn0001624,FBgn0001075,FBgn0005677,FBgn0267336,FBgn0052666,FBgn0003175,FBgn0085432,FBgn0015600,FBgn0003382,FBgn0039932,FBgn0014343,FBgn0086901,FBgn0264272,FBgn0001319,FBgn0000179,FBg…
GO:0007444	imaginal disc development	biological_process	2.4817e-15	5.7712e-13	49	259	647	12231	FBgn0259685,FBgn0011826,FBgn0261563,FBgn0086898,FBgn0260003,FBgn0001624,FBgn0023172,FBgn0015919,FBgn0003118,FBgn0261963,FBgn0041604,FBgn0010575,FBgn0004635,FBgn0038197,FBgn0263706,FBgn0010470,FBgn0005630,FBgn0011817,FBgn0264442,FBgn0004885,FBgn0260397,FBgn0261570,FBgn0000114,FBgn0004859,FBgn0020307,FBgn0011481,FBgn0041111,FBgn0019650,FBgn0020309,FBgn0000497,FBgn0000244,FBgn0086758,FBgn0001075,FBg…
GO:0035239	tube morphogenesis	biological_process	2.9778e-15	6.7637e-13	45	259	553	12231	FBgn0020299,FBgn0020307,FBgn0000114,FBgn0261570,FBgn0260397,FBgn0086758,FBgn0000244,FBgn0000497,FBgn0020309,FBgn0003382,FBgn0039932,FBgn0015600,FBgn0003175,FBgn0085432,FBgn0052666,FBgn0267336,FBgn0001075,FBgn0005677,FBgn0031903,FBgn0000633,FBgn0086901,FBgn0264272,FBgn0001319,FBgn0000179,FBgn0014343,FBgn0261563,FBgn0259685,FBgn0001624,FBgn0023172,FBgn0000299,FBgn0260003,FBgn0086898,FBgn0010575,FBg…
GO:0035120	post-embryonic appendage morphogenesis	biological_process	3.1678e-15	7.0317e-13	38	259	397	12231	FBgn0011817,FBgn0264442,FBgn0004885,FBgn0010470,FBgn0005630,FBgn0004635,FBgn0263706,FBgn0038197,FBgn0010575,FBgn0041604,FBgn0003118,FBgn0015919,FBgn0023172,FBgn0260003,FBgn0086898,FBgn0261563,FBgn0031903,FBgn0014343,FBgn0000179,FBgn0264272,FBgn0001319,FBgn0086901,FBgn0039932,FBgn0003382,FBgn0085432,FBgn0003175,FBgn0015600,FBgn0267336,FBgn0052666,FBgn0001075,FBgn0086758,FBgn0000244,FBgn0000497,FBg…
GO:0048667	cell morphogenesis involved in neuron differentiation	biological_process	3.3857e-15	7.3485e-13	41	259	463	12231	FBgn0086758,FBgn0029157,FBgn0001139,FBgn0040271,FBgn0033791,FBgn0004859,FBgn0260660,FBgn0004449,FBgn0000479,FBgn0028645,FBgn0004606,FBgn0004795,FBgn0001319,FBgn0086901,FBgn0261723,FBgn0014343,FBgn0005677,FBgn0023172,FBgn0001320,FBgn0001138,FBgn0045852,FBgn0038498,FBgn0261451,FBgn0000210,FBgn0004360,FBgn0259685,FBgn0264442,FBgn0004885,FBgn0041092,FBgn0262975,FBgn0262139,FBgn0005630,FBgn0005624,FBg…
GO:0001071	nucleic acid binding transcription factor activity	molecular_function	3.6648e-15	7.6157e-13	40	259	442	12231	FBgn0262139,FBgn0262975,FBgn0004878,FBgn0000413,FBgn0264442,FBgn0040318,FBgn0038197,FBgn0005636,FBgn0005630,FBgn0003118,FBgn0261963,FBgn0023091,FBgn0010575,FBgn0263772,FBgn0024288,FBgn0015919,FBgn0001320,FBgn0264490,FBgn0003117,FBgn0045852,FBgn0001138,FBgn0000210,FBgn0004606,FBgn0016694,FBgn0014343,FBgn0261723,FBgn0001319,FBgn0000179,FBgn0004795,FBgn0259234,FBgn0085432,FBgn0262477,FBgn0000448,FBg…
GO:0003700	transcription factor activity, sequence-specific DNA binding	molecular_function	3.6648e-15	7.6157e-13	40	259	442	12231	FBgn0261723,FBgn0014343,FBgn0001319,FBgn0000179,FBgn0004795,FBgn0259234,FBgn0004606,FBgn0016694,FBgn0262477,FBgn0085432,FBgn0035849,FBgn0000448,FBgn0086758,FBgn0004914,FBgn0004859,FBgn0020307,FBgn0041111,FBgn0019650,FBgn0040318,FBgn0038197,FBgn0005636,FBgn0005630,FBgn0262139,FBgn0262975,FBgn0004878,FBgn0000413,FBgn0264442,FBgn0015919,FBgn0261963,FBgn0003118,FBgn0010575,FBgn0023091,FBgn0263772,FBg…
GO:0048729	tissue morphogenesis	biological_process	4.0219e-15	8.1836e-13	49	259	655	12231	FBgn0260397,FBgn0261570,FBgn0000114,FBgn0020307,FBgn0020299,FBgn0020309,FBgn0000497,FBgn0000244,FBgn0086758,FBgn0001075,FBgn0005677,FBgn0267336,FBgn0052666,FBgn0003175,FBgn0085432,FBgn0085408,FBgn0015600,FBgn0039932,FBgn0003382,FBgn0014343,FBgn0000179,FBgn0264272,FBgn0086901,FBgn0001319,FBgn0031903,FBgn0000633,FBgn0259685,FBgn0261563,FBgn0086898,FBgn0260003,FBgn0003117,FBgn0000299,FBgn0023172,FBg…
GO:0035220	wing disc development	biological_process	4.8828e-15	9.6801e-13	41	259	468	12231	FBgn0041604,FBgn0010575,FBgn0003118,FBgn0015919,FBgn0004885,FBgn0264442,FBgn0011817,FBgn0005630,FBgn0010470,FBgn0038197,FBgn0004635,FBgn0261563,FBgn0011826,FBgn0023172,FBgn0260003,FBgn0086898,FBgn0039932,FBgn0003382,FBgn0015600,FBgn0003175,FBgn0085432,FBgn0052666,FBgn0267336,FBgn0001075,FBgn0031903,FBgn0264272,FBgn0000179,FBgn0086901,FBgn0001319,FBgn0014343,FBgn0011481,FBgn0041111,FBgn0020307,FBg…
GO:0048858	cell projection morphogenesis	biological_process	4.9555e-15	9.6801e-13	47	259	609	12231	FBgn0000479,FBgn0028645,FBgn0004606,FBgn0026189,FBgn0004795,FBgn0265296,FBgn0001319,FBgn0086901,FBgn0261723,FBgn0014343,FBgn0027596,FBgn0005677,FBgn0086758,FBgn0000108,FBgn0001139,FBgn0040271,FBgn0029157,FBgn0033791,FBgn0011481,FBgn0004859,FBgn0260660,FBgn0004449,FBgn0004885,FBgn0264442,FBgn0041092,FBgn0262975,FBgn0262139,FBgn0028704,FBgn0005630,FBgn0005624,FBgn0038197,FBgn0005636,FBgn0264089,FBg…
GO:0032990	cell part morphogenesis	biological_process	6.7403e-15	1.2908e-12	47	259	614	12231	FBgn0004449,FBgn0004859,FBgn0260660,FBgn0011481,FBgn0033791,FBgn0000108,FBgn0029157,FBgn0040271,FBgn0001139,FBgn0086758,FBgn0005677,FBgn0027596,FBgn0265296,FBgn0086901,FBgn0001319,FBgn0261723,FBgn0014343,FBgn0026189,FBgn0004795,FBgn0004606,FBgn0000479,FBgn0028645,FBgn0259685,FBgn0038498,FBgn0004360,FBgn0261451,FBgn0000210,FBgn0001138,FBgn0045852,FBgn0001320,FBgn0023172,FBgn0261963,FBgn0041604,FBg…
GO:0007399	nervous system development	biological_process	7.1055e-15	1.3346e-12	80	259	1567	12231	FBgn0000448,FBgn0040271,FBgn0029157,FBgn0000497,FBgn0033791,FBgn0040752,FBgn0011481,FBgn0041111,FBgn0260660,FBgn0004449,FBgn0028645,FBgn0083975,FBgn0031903,FBgn0026189,FBgn0010407,FBgn0265296,FBgn0264272,FBgn0014343,FBgn0264908,FBgn0003382,FBgn0027596,FBgn0005677,FBgn0001320,FBgn0045852,FBgn0086898,FBgn0003499,FBgn0034070,FBgn0013469,FBgn0000557,FBgn0004885,FBgn0041092,FBgn0262139,FBgn0028704,FBg…
GO:0002009	morphogenesis of an epithelium	biological_process	7.2662e-15	1.339e-12	48	259	640	12231	FBgn0259685,FBgn0261563,FBgn0003117,FBgn0260003,FBgn0086898,FBgn0000299,FBgn0023172,FBgn0001624,FBgn0015919,FBgn0003392,FBgn0003118,FBgn0010575,FBgn0041604,FBgn0038197,FBgn0263706,FBgn0004635,FBgn0005630,FBgn0010470,FBgn0262139,FBgn0004885,FBgn0264442,FBgn0011817,FBgn0260397,FBgn0261570,FBgn0000114,FBgn0020307,FBgn0020299,FBgn0020309,FBgn0000497,FBgn0000244,FBgn0086758,FBgn0005677,FBgn0001075,FBg…
GO:0048707	instar larval or pupal morphogenesis	biological_process	7.5347e-15	1.3628e-12	41	259	474	12231	FBgn0031903,FBgn0000179,FBgn0264272,FBgn0086901,FBgn0001319,FBgn0014343,FBgn0267336,FBgn0052666,FBgn0005677,FBgn0001075,FBgn0039932,FBgn0003382,FBgn0015600,FBgn0085432,FBgn0003175,FBgn0000497,FBgn0020309,FBgn0086758,FBgn0000244,FBgn0000114,FBgn0260397,FBgn0261570,FBgn0020307,FBgn0005630,FBgn0010470,FBgn0263706,FBgn0038197,FBgn0004635,FBgn0004885,FBgn0264442,FBgn0011817,FBgn0015919,FBgn0010575,FBg…
GO:0007552	metamorphosis	biological_process	9.4091e-15	1.6709e-12	42	259	500	12231	FBgn0264442,FBgn0004885,FBgn0011817,FBgn0263706,FBgn0038197,FBgn0004635,FBgn0005630,FBgn0010470,FBgn0003118,FBgn0041604,FBgn0010575,FBgn0015919,FBgn0023172,FBgn0001624,FBgn0260003,FBgn0086898,FBgn0261563,FBgn0000210,FBgn0264272,FBgn0086901,FBgn0001319,FBgn0000179,FBgn0014343,FBgn0031903,FBgn0015600,FBgn0085432,FBgn0003175,FBgn0003382,FBgn0039932,FBgn0005677,FBgn0001075,FBgn0052666,FBgn0267336,FBg…
GO:0051252	regulation of RNA metabolic process	biological_process	1.1931e-14	2.0809e-12	58	259	914	12231	FBgn0016694,FBgn0004606,FBgn0259234,FBgn0004795,FBgn0031903,FBgn0004587,FBgn0261723,FBgn0014343,FBgn0001319,FBgn0000179,FBgn0039932,FBgn0086613,FBgn0085432,FBgn0262477,FBgn0267791,FBgn0000448,FBgn0001139,FBgn0013531,FBgn0035849,FBgn0020309,FBgn0019650,FBgn0020307,FBgn0086675,FBgn0041111,FBgn0011481,FBgn0000114,FBgn0004859,FBgn0260397,FBgn0004914,FBgn0041092,FBgn0264442,FBgn0000413,FBgn0262139,FBg…
GO:0007560	imaginal disc morphogenesis	biological_process	1.3951e-14	2.3493e-12	40	259	460	12231	FBgn0004885,FBgn0264442,FBgn0011817,FBgn0263706,FBgn0038197,FBgn0004635,FBgn0005630,FBgn0010470,FBgn0003118,FBgn0041604,FBgn0010575,FBgn0015919,FBgn0001624,FBgn0023172,FBgn0086898,FBgn0260003,FBgn0261563,FBgn0264272,FBgn0001319,FBgn0086901,FBgn0000179,FBgn0014343,FBgn0031903,FBgn0015600,FBgn0085432,FBgn0003175,FBgn0003382,FBgn0039932,FBgn0005677,FBgn0001075,FBgn0267336,FBgn0052666,FBgn0000244,FBg…
GO:0048563	post-embryonic organ morphogenesis	biological_process	1.3951e-14	2.3493e-12	40	259	460	12231	FBgn0263706,FBgn0038197,FBgn0004635,FBgn0005630,FBgn0010470,FBgn0004885,FBgn0264442,FBgn0011817,FBgn0015919,FBgn0003118,FBgn0041604,FBgn0010575,FBgn0086898,FBgn0260003,FBgn0023172,FBgn0001624,FBgn0261563,FBgn0264272,FBgn0000179,FBgn0086901,FBgn0001319,FBgn0014343,FBgn0031903,FBgn0005677,FBgn0001075,FBgn0052666,FBgn0267336,FBgn0015600,FBgn0085432,FBgn0003175,FBgn0039932,FBgn0003382,FBgn0020309,FBg…
GO:0009886	post-embryonic morphogenesis	biological_process	1.6381e-14	2.7118e-12	41	259	485	12231	FBgn0000210,FBgn0261563,FBgn0260003,FBgn0086898,FBgn0023172,FBgn0001624,FBgn0015919,FBgn0003118,FBgn0041604,FBgn0010575,FBgn0038197,FBgn0263706,FBgn0004635,FBgn0005630,FBgn0010470,FBgn0264442,FBgn0004885,FBgn0011817,FBgn0261570,FBgn0260397,FBgn0000114,FBgn0020307,FBgn0020309,FBgn0000497,FBgn0000244,FBgn0086758,FBgn0005677,FBgn0001075,FBgn0052666,FBgn0267336,FBgn0015600,FBgn0003175,FBgn0085432,FBg…
GO:0019219	regulation of nucleobase-containing compound metabolic process	biological_process	1.9888e-14	3.2374e-12	59	259	953	12231	FBgn0000179,FBgn0001319,FBgn0261723,FBgn0014343,FBgn0031903,FBgn0004587,FBgn0259234,FBgn0004795,FBgn0004606,FBgn0016694,FBgn0267791,FBgn0262477,FBgn0085432,FBgn0086613,FBgn0039932,FBgn0020309,FBgn0035849,FBgn0013531,FBgn0001139,FBgn0260753,FBgn0000448,FBgn0004914,FBgn0260397,FBgn0004859,FBgn0000114,FBgn0086675,FBgn0041111,FBgn0011481,FBgn0020307,FBgn0019650,FBgn0038197,FBgn0039920,FBgn0005636,FBg…
GO:0007165	signal transduction	biological_process	2.4733e-14	3.9602e-12	71	259	1315	12231	FBgn0259685,FBgn0004360,FBgn0261451,FBgn0025631,FBgn0003117,FBgn0264490,FBgn0023172,FBgn0262562,FBgn0003392,FBgn0261573,FBgn0003118,FBgn0041604,FBgn0004842,FBgn0004635,FBgn0264089,FBgn0010470,FBgn0011817,FBgn0032388,FBgn0261570,FBgn0004859,FBgn0266418,FBgn0028990,FBgn0020309,FBgn0029881,FBgn0263111,FBgn0038880,FBgn0001139,FBgn0260753,FBgn0001075,FBgn0262738,FBgn0039054,FBgn0039932,FBgn0086901,FBg…
GO:0051171	regulation of nitrogen compound metabolic process	biological_process	4.3271e-14	6.8166e-12	62	259	1057	12231	FBgn0267791,FBgn0262477,FBgn0264001,FBgn0085432,FBgn0039932,FBgn0086613,FBgn0000179,FBgn0001319,FBgn0014343,FBgn0261723,FBgn0004587,FBgn0031903,FBgn0259234,FBgn0004795,FBgn0004606,FBgn0000182,FBgn0016694,FBgn0004914,FBgn0260397,FBgn0004859,FBgn0000114,FBgn0086675,FBgn0041111,FBgn0011481,FBgn0020307,FBgn0019650,FBgn0020309,FBgn0038826,FBgn0035849,FBgn0013531,FBgn0001139,FBgn0260753,FBgn0000448,FBg…
GO:0040011	locomotion	biological_process	4.9373e-14	7.6544e-12	44	259	573	12231	FBgn0001624,FBgn0001320,FBgn0001138,FBgn0003499,FBgn0261563,FBgn0261451,FBgn0000210,FBgn0038498,FBgn0041092,FBgn0267727,FBgn0038975,FBgn0011817,FBgn0264442,FBgn0004885,FBgn0005624,FBgn0005630,FBgn0052423,FBgn0264089,FBgn0000024,FBgn0005636,FBgn0041604,FBgn0010575,FBgn0261963,FBgn0003118,FBgn0003392,FBgn0260753,FBgn0264693,FBgn0040271,FBgn0033791,FBgn0020299,FBgn0260660,FBgn0004449,FBgn0028645,FBg…
GO:0044763	single-organism cellular process	biological_process	5.1151e-14	7.8062e-12	168	259	5158	12231	FBgn0267727,FBgn0041092,FBgn0004885,FBgn0030558,FBgn0019968,FBgn0005624,FBgn0005630,FBgn0028704,FBgn0025936,FBgn0000024,FBgn0263706,FBgn0025639,FBgn0003499,FBgn0264815,FBgn0000557,FBgn0052082,FBgn0013995,FBgn0043070,FBgn0263397,FBgn0003382,FBgn0085432,FBgn0029791,FBgn0015600,FBgn0005677,FBgn0038837,FBgn0000182,FBgn0000633,FBgn0264908,FBgn0053531,FBgn0020299,FBgn0011481,FBgn0037387,FBgn0260660,FBg…
GO:0030154	cell differentiation	biological_process	6.1368e-14	9.2213e-12	96	259	2183	12231	FBgn0003392,FBgn0015919,FBgn0041604,FBgn0262509,FBgn0003118,FBgn0005636,FBgn0004635,FBgn0264089,FBgn0040318,FBgn0264442,FBgn0000413,FBgn0032388,FBgn0262975,FBgn0004878,FBgn0038498,FBgn0261451,FBgn0000210,FBgn0004360,FBgn0259685,FBgn0032194,FBgn0025631,FBgn0001138,FBgn0003117,FBgn0264490,FBgn0001624,FBgn0023172,FBgn0004509,FBgn0262738,FBgn0267791,FBgn0001075,FBgn0264695,FBgn0004795,FBgn0266098,FBg…
GO:2000112	regulation of cellular macromolecule biosynthetic process	biological_process	7.3977e-14	1.0947e-11	57	259	925	12231	FBgn0038826,FBgn0020309,FBgn0035849,FBgn0001139,FBgn0013531,FBgn0000448,FBgn0260397,FBgn0004914,FBgn0000114,FBgn0004859,FBgn0020307,FBgn0011481,FBgn0041111,FBgn0019650,FBgn0261723,FBgn0014343,FBgn0001319,FBgn0000179,FBgn0259234,FBgn0004795,FBgn0031903,FBgn0000182,FBgn0004606,FBgn0016694,FBgn0262477,FBgn0085432,FBgn0264001,FBgn0039932,FBgn0086613,FBgn0003117,FBgn0045852,FBgn0001138,FBgn0001320,FBg…
GO:0010556	regulation of macromolecule biosynthetic process	biological_process	7.7424e-14	1.1287e-11	57	259	926	12231	FBgn0001320,FBgn0264490,FBgn0003117,FBgn0045852,FBgn0001138,FBgn0003499,FBgn0000210,FBgn0004360,FBgn0262139,FBgn0004878,FBgn0262975,FBgn0041092,FBgn0000413,FBgn0264442,FBgn0040318,FBgn0038197,FBgn0025639,FBgn0005636,FBgn0005624,FBgn0005630,FBgn0261963,FBgn0261573,FBgn0003118,FBgn0023091,FBgn0010575,FBgn0024288,FBgn0263772,FBgn0015919,FBgn0001139,FBgn0013531,FBgn0000448,FBgn0038826,FBgn0020309,FBg…
GO:0009791	post-embryonic development	biological_process	1.1466e-13	1.6417e-11	45	259	612	12231	FBgn0031903,FBgn0014343,FBgn0086901,FBgn0264272,FBgn0001319,FBgn0000179,FBgn0267336,FBgn0052666,FBgn0005677,FBgn0001075,FBgn0003382,FBgn0039932,FBgn0085432,FBgn0003175,FBgn0015600,FBgn0032252,FBgn0000497,FBgn0020309,FBgn0086758,FBgn0000244,FBgn0000114,FBgn0260397,FBgn0261570,FBgn0020307,FBgn0028369,FBgn0010470,FBgn0005630,FBgn0004635,FBgn0263706,FBgn0038197,FBgn0011817,FBgn0004885,FBgn0264442,FBg…
GO:0048869	cellular developmental process	biological_process	1.1598e-13	1.6417e-11	98	259	2278	12231	FBgn0000182,FBgn0028645,FBgn0265296,FBgn0264272,FBgn0264908,FBgn0014343,FBgn0039704,FBgn0031903,FBgn0026189,FBgn0000633,FBgn0015600,FBgn0027596,FBgn0085432,FBgn0003382,FBgn0005677,FBgn0040271,FBgn0029157,FBgn0264693,FBgn0000497,FBgn0033791,FBgn0041111,FBgn0011481,FBgn0020299,FBgn0260397,FBgn0004449,FBgn0000114,FBgn0260660,FBgn0262139,FBgn0004885,FBgn0267727,FBgn0041092,FBgn0038197,FBgn0025936,FBg…
GO:0050896	response to stimulus	biological_process	1.8596e-13	2.5947e-11	106	259	2593	12231	FBgn0003117,FBgn0001138,FBgn0264490,FBgn0023172,FBgn0001624,FBgn0259685,FBgn0004360,FBgn0261451,FBgn0000210,FBgn0038498,FBgn0025631,FBgn0264089,FBgn0004635,FBgn0004842,FBgn0005636,FBgn0010470,FBgn0032593,FBgn0262975,FBgn0032388,FBgn0011817,FBgn0000413,FBgn0264442,FBgn0262562,FBgn0003392,FBgn0261573,FBgn0003118,FBgn0038035,FBgn0041604,FBgn0020309,FBgn0029881,FBgn0038880,FBgn0001139,FBgn0263111,FBg…
GO:0031326	regulation of cellular biosynthetic process	biological_process	1.9966e-13	2.7465e-11	58	259	976	12231	FBgn0264490,FBgn0001320,FBgn0001138,FBgn0045852,FBgn0003117,FBgn0003499,FBgn0000210,FBgn0004360,FBgn0264442,FBgn0000413,FBgn0041092,FBgn0262975,FBgn0004878,FBgn0262139,FBgn0005630,FBgn0005624,FBgn0005636,FBgn0038197,FBgn0025639,FBgn0040318,FBgn0263772,FBgn0024288,FBgn0023091,FBgn0010575,FBgn0261573,FBgn0261963,FBgn0003118,FBgn0015919,FBgn0260753,FBgn0000448,FBgn0013531,FBgn0001139,FBgn0035849,FBg…
GO:0009889	regulation of biosynthetic process	biological_process	2.0847e-13	2.828e-11	58	259	977	12231	FBgn0015919,FBgn0263772,FBgn0024288,FBgn0023091,FBgn0010575,FBgn0261963,FBgn0003118,FBgn0261573,FBgn0005630,FBgn0005624,FBgn0038197,FBgn0005636,FBgn0025639,FBgn0040318,FBgn0264442,FBgn0000413,FBgn0041092,FBgn0262975,FBgn0004878,FBgn0262139,FBgn0004360,FBgn0000210,FBgn0003499,FBgn0001138,FBgn0045852,FBgn0003117,FBgn0264490,FBgn0001320,FBgn0262477,FBgn0039932,FBgn0086613,FBgn0264001,FBgn0085432,FBg…
GO:0006355	regulation of transcription, DNA-templated	biological_process	2.4841e-13	3.2349e-11	53	259	839	12231	FBgn0260397,FBgn0004914,FBgn0004859,FBgn0020307,FBgn0011481,FBgn0041111,FBgn0019650,FBgn0020309,FBgn0035849,FBgn0001139,FBgn0013531,FBgn0000448,FBgn0262477,FBgn0085432,FBgn0039932,FBgn0086613,FBgn0261723,FBgn0014343,FBgn0000179,FBgn0001319,FBgn0004795,FBgn0259234,FBgn0031903,FBgn0004606,FBgn0016694,FBgn0004360,FBgn0000210,FBgn0003499,FBgn0003117,FBgn0045852,FBgn0001138,FBgn0001320,FBgn0264490,FBg…
GO:1903506	regulation of nucleic acid-templated transcription	biological_process	2.4841e-13	3.2349e-11	53	259	839	12231	FBgn0004360,FBgn0000210,FBgn0003499,FBgn0003117,FBgn0045852,FBgn0001138,FBgn0001320,FBgn0264490,FBgn0015919,FBgn0261573,FBgn0261963,FBgn0003118,FBgn0010575,FBgn0023091,FBgn0024288,FBgn0263772,FBgn0040318,FBgn0038197,FBgn0005636,FBgn0025639,FBgn0005624,FBgn0005630,FBgn0262139,FBgn0262975,FBgn0004878,FBgn0041092,FBgn0000413,FBgn0264442,FBgn0260397,FBgn0004914,FBgn0004859,FBgn0020307,FBgn0041111,FBg…
GO:2001141	regulation of RNA biosynthetic process	biological_process	2.4841e-13	3.2349e-11	53	259	839	12231	FBgn0016694,FBgn0004606,FBgn0004795,FBgn0259234,FBgn0031903,FBgn0261723,FBgn0014343,FBgn0001319,FBgn0000179,FBgn0086613,FBgn0039932,FBgn0085432,FBgn0262477,FBgn0000448,FBgn0001139,FBgn0013531,FBgn0035849,FBgn0020309,FBgn0019650,FBgn0020307,FBgn0041111,FBgn0011481,FBgn0004859,FBgn0260397,FBgn0004914,FBgn0041092,FBgn0000413,FBgn0264442,FBgn0262139,FBgn0262975,FBgn0004878,FBgn0005624,FBgn0005630,FBg…
GO:0006351	transcription, DNA-templated	biological_process	7.8373e-13	9.9411e-11	55	259	921	12231	FBgn0003499,FBgn0000210,FBgn0004360,FBgn0264490,FBgn0001320,FBgn0045852,FBgn0001138,FBgn0003117,FBgn0023091,FBgn0010575,FBgn0263772,FBgn0024288,FBgn0261963,FBgn0003118,FBgn0261573,FBgn0015919,FBgn0041092,FBgn0264442,FBgn0000413,FBgn0262139,FBgn0262975,FBgn0004878,FBgn0005624,FBgn0005630,FBgn0040318,FBgn0038197,FBgn0025639,FBgn0005636,FBgn0019650,FBgn0020307,FBgn0011481,FBgn0041111,FBgn0004859,FBg…
GO:0097659	nucleic acid-templated transcription	biological_process	7.8373e-13	9.9411e-11	55	259	921	12231	FBgn0031903,FBgn0259234,FBgn0004795,FBgn0001319,FBgn0000179,FBgn0014343,FBgn0261723,FBgn0016694,FBgn0004606,FBgn0005677,FBgn0262477,FBgn0086613,FBgn0039932,FBgn0085432,FBgn0035849,FBgn0020309,FBgn0000448,FBgn0013531,FBgn0001139,FBgn0030738,FBgn0004859,FBgn0004914,FBgn0260397,FBgn0019650,FBgn0011481,FBgn0041111,FBgn0020307,FBgn0005630,FBgn0005624,FBgn0025639,FBgn0038197,FBgn0005636,FBgn0040318,FBg…
GO:0032774	RNA biosynthetic process	biological_process	8.9236e-13	1.1174e-10	55	259	924	12231	FBgn0020307,FBgn0041111,FBgn0011481,FBgn0019650,FBgn0260397,FBgn0004914,FBgn0004859,FBgn0030738,FBgn0001139,FBgn0013531,FBgn0000448,FBgn0020309,FBgn0035849,FBgn0085432,FBgn0039932,FBgn0086613,FBgn0262477,FBgn0005677,FBgn0004606,FBgn0016694,FBgn0261723,FBgn0014343,FBgn0001319,FBgn0000179,FBgn0004795,FBgn0259234,FBgn0031903,FBgn0003499,FBgn0000210,FBgn0004360,FBgn0001320,FBgn0264490,FBgn0003117,FBg…
GO:0060255	regulation of macromolecule metabolic process	biological_process	1.3686e-12	1.6921e-10	70	259	1395	12231	FBgn0001139,FBgn0039260,FBgn0038826,FBgn0020309,FBgn0019650,FBgn0028990,FBgn0086675,FBgn0004859,FBgn0016694,FBgn0004606,FBgn0004795,FBgn0004587,FBgn0261723,FBgn0001319,FBgn0039932,FBgn0086613,FBgn0262477,FBgn0263974,FBgn0267791,FBgn0264490,FBgn0001138,FBgn0003117,FBgn0000210,FBgn0004360,FBgn0259685,FBgn0032388,FBgn0000413,FBgn0264442,FBgn0262975,FBgn0004878,FBgn0040318,FBgn0004635,FBgn0005636,FBg…
GO:0005886	plasma membrane	cellular_component	1.6837e-12	2.0556e-10	53	259	881	12231	FBgn0260753,FBgn0263111,FBgn0025391,FBgn0039928,FBgn0000108,FBgn0038880,FBgn0000497,FBgn0259822,FBgn0261260,FBgn0028369,FBgn0262869,FBgn0261929,FBgn0259111,FBgn0004449,FBgn0263219,FBgn0083975,FBgn0028645,FBgn0000182,FBgn0026189,FBgn0010407,FBgn0031903,FBgn0265296,FBgn0086901,FBgn0264908,FBgn0085408,FBgn0004509,FBgn0262738,FBgn0038837,FBgn0001075,FBgn0001624,FBgn0023172,FBgn0052843,FBgn0013995,FBg…
GO:0022008	neurogenesis	biological_process	1.8948e-12	2.2848e-10	69	259	1372	12231	FBgn0010575,FBgn0261963,FBgn0004885,FBgn0041092,FBgn0262139,FBgn0028704,FBgn0005630,FBgn0005624,FBgn0038197,FBgn0025936,FBgn0034070,FBgn0000557,FBgn0013469,FBgn0001320,FBgn0045852,FBgn0086898,FBgn0003382,FBgn0027596,FBgn0005677,FBgn0028645,FBgn0031903,FBgn0026189,FBgn0264272,FBgn0265296,FBgn0264908,FBgn0014343,FBgn0011481,FBgn0041111,FBgn0260660,FBgn0004449,FBgn0040271,FBgn0029157,FBgn0000497,FBg…
GO:0006357	regulation of transcription from RNA polymerase II promoter	biological_process	2.2313e-12	2.6576e-10	36	259	442	12231	FBgn0000413,FBgn0264442,FBgn0262139,FBgn0004878,FBgn0262975,FBgn0005630,FBgn0040318,FBgn0038197,FBgn0010575,FBgn0023091,FBgn0261573,FBgn0261963,FBgn0003118,FBgn0015919,FBgn0264490,FBgn0001320,FBgn0001138,FBgn0003117,FBgn0004360,FBgn0000210,FBgn0004606,FBgn0259234,FBgn0004795,FBgn0031903,FBgn0014343,FBgn0000179,FBgn0001319,FBgn0039932,FBgn0085432,FBgn0000448,FBgn0001139,FBgn0013531,FBgn0020309,FBg…
GO:0002165	instar larval or pupal development	biological_process	4.0619e-12	4.7798e-10	41	259	574	12231	FBgn0086898,FBgn0260003,FBgn0023172,FBgn0001624,FBgn0000210,FBgn0261563,FBgn0005630,FBgn0010470,FBgn0263706,FBgn0038197,FBgn0004635,FBgn0264442,FBgn0004885,FBgn0011817,FBgn0015919,FBgn0010575,FBgn0041604,FBgn0003118,FBgn0000497,FBgn0020309,FBgn0086758,FBgn0000244,FBgn0000114,FBgn0261570,FBgn0260397,FBgn0020307,FBgn0031903,FBgn0086901,FBgn0264272,FBgn0000179,FBgn0001319,FBgn0014343,FBgn0052666,FBg…
GO:0016043	cellular component organization	biological_process	4.9629e-12	5.7705e-10	99	259	2459	12231	FBgn0041604,FBgn0261573,FBgn0003392,FBgn0038975,FBgn0011817,FBgn0264442,FBgn0262975,FBgn0004635,FBgn0264089,FBgn0005636,FBgn0025631,FBgn0000210,FBgn0261451,FBgn0004360,FBgn0038498,FBgn0264607,FBgn0032194,FBgn0259685,FBgn0001624,FBgn0264490,FBgn0023172,FBgn0001138,FBgn0085408,FBgn0264695,FBgn0052666,FBgn0001075,FBgn0016694,FBgn0000479,FBgn0004606,FBgn0004795,FBgn0004587,FBgn0261723,FBgn0086901,FBg…
GO:0019222	regulation of metabolic process	biological_process	8.2261e-12	9.4522e-10	72	259	1516	12231	FBgn0010575,FBgn0261963,FBgn0005630,FBgn0005624,FBgn0038197,FBgn0039920,FBgn0025639,FBgn0004885,FBgn0041092,FBgn0262139,FBgn0003499,FBgn0264815,FBgn0045852,FBgn0001320,FBgn0005677,FBgn0264001,FBgn0085432,FBgn0031903,FBgn0259234,FBgn0000179,FBgn0014343,FBgn0000182,FBgn0000114,FBgn0004914,FBgn0260397,FBgn0041111,FBgn0011481,FBgn0020307,FBgn0035849,FBgn0264693,FBgn0000448,FBgn0013531,FBgn0015919,FBg…
GO:0042330	taxis	biological_process	8.5767e-12	9.7405e-10	30	259	326	12231	FBgn0000210,FBgn0261451,FBgn0260660,FBgn0038498,FBgn0004449,FBgn0001138,FBgn0033791,FBgn0260753,FBgn0001624,FBgn0040271,FBgn0262738,FBgn0005677,FBgn0010575,FBgn0041604,FBgn0261963,FBgn0005624,FBgn0004795,FBgn0005630,FBgn0261723,FBgn0264089,FBgn0014343,FBgn0052423,FBgn0000024,FBgn0005636,FBgn0011817,FBgn0267727,FBgn0028645,FBgn0264442,FBgn0004885,FBgn0004606
GO:0007409	axonogenesis	biological_process	9.4824e-12	1.0645e-09	29	259	306	12231	FBgn0005677,FBgn0010575,FBgn0041604,FBgn0261963,FBgn0005630,FBgn0004795,FBgn0005624,FBgn0005636,FBgn0261723,FBgn0264089,FBgn0025936,FBgn0014343,FBgn0004635,FBgn0000479,FBgn0264442,FBgn0004885,FBgn0041092,FBgn0028645,FBgn0004606,FBgn0038498,FBgn0261451,FBgn0260660,FBgn0004360,FBgn0004449,FBgn0001138,FBgn0033791,FBgn0023172,FBgn0029157,FBgn0040271
GO:0080090	regulation of primary metabolic process	biological_process	1.4384e-11	1.5965e-09	66	259	1336	12231	FBgn0262139,FBgn0041092,FBgn0039920,FBgn0025639,FBgn0038197,FBgn0005624,FBgn0005630,FBgn0261963,FBgn0010575,FBgn0001320,FBgn0045852,FBgn0264815,FBgn0003499,FBgn0000182,FBgn0014343,FBgn0000179,FBgn0259234,FBgn0031903,FBgn0085432,FBgn0264001,FBgn0013531,FBgn0000448,FBgn0035849,FBgn0020307,FBgn0041111,FBgn0011481,FBgn0260397,FBgn0004914,FBgn0000114,FBgn0004878,FBgn0262975,FBgn0032388,FBgn0000413,FBg…
GO:0007166	cell surface receptor signaling pathway	biological_process	1.5343e-11	1.6838e-09	40	259	573	12231	FBgn0052843,FBgn0003117,FBgn0039709,FBgn0261451,FBgn0004360,FBgn0259685,FBgn0011817,FBgn0010470,FBgn0025936,FBgn0264089,FBgn0004635,FBgn0004842,FBgn0038197,FBgn0010575,FBgn0041604,FBgn0261573,FBgn0003118,FBgn0003392,FBgn0260753,FBgn0040271,FBgn0001139,FBgn0033791,FBgn0020309,FBgn0029881,FBgn0020299,FBgn0028990,FBgn0260660,FBgn0004859,FBgn0260397,FBgn0041723,FBgn0010407,FBgn0031903,FBgn0014343,FBg…
GO:0061564	axon development	biological_process	1.6459e-11	1.7862e-09	29	259	313	12231	FBgn0041604,FBgn0010575,FBgn0261963,FBgn0005677,FBgn0028645,FBgn0041092,FBgn0264442,FBgn0000479,FBgn0004885,FBgn0004606,FBgn0005624,FBgn0004795,FBgn0005630,FBgn0261723,FBgn0264089,FBgn0014343,FBgn0025936,FBgn0004635,FBgn0005636,FBgn0261451,FBgn0004360,FBgn0260660,FBgn0038498,FBgn0004449,FBgn0023172,FBgn0029157,FBgn0040271,FBgn0001138,FBgn0033791
GO:0071944	cell periphery	cellular_component	1.8293e-11	1.9634e-09	55	259	998	12231	FBgn0032151,FBgn0033494,FBgn0003392,FBgn0041604,FBgn0262509,FBgn0082585,FBgn0004635,FBgn0025936,FBgn0000024,FBgn0004842,FBgn0038975,FBgn0259685,FBgn0004360,FBgn0038498,FBgn0264607,FBgn0025631,FBgn0000036,FBgn0039709,FBgn0260003,FBgn0263397,FBgn0013995,FBgn0052843,FBgn0023172,FBgn0001624,FBgn0001075,FBgn0038837,FBgn0262738,FBgn0004509,FBgn0085408,FBgn0015600,FBgn0003382,FBgn0264908,FBgn0086901,FBg…
GO:0071840	cellular component organization or biogenesis	biological_process	1.9564e-11	2.077e-09	99	259	2516	12231	FBgn0000244,FBgn0040271,FBgn0029157,FBgn0264693,FBgn0033791,FBgn0000497,FBgn0041111,FBgn0011481,FBgn0040752,FBgn0260397,FBgn0004449,FBgn0000114,FBgn0260660,FBgn0000182,FBgn0083975,FBgn0028645,FBgn0264272,FBgn0265296,FBgn0014343,FBgn0039704,FBgn0026189,FBgn0031903,FBgn0015600,FBgn0027596,FBgn0003382,FBgn0005677,FBgn0001320,FBgn0052082,FBgn0086898,FBgn0045852,FBgn0034070,FBgn0039709,FBgn0011826,FBg…
GO:0010629	negative regulation of gene expression	biological_process	2.1617e-11	2.2702e-09	34	259	430	12231	FBgn0020307,FBgn0004859,FBgn0000114,FBgn0260397,FBgn0000448,FBgn0001139,FBgn0020309,FBgn0039932,FBgn0086613,FBgn0264001,FBgn0085432,FBgn0263974,FBgn0005677,FBgn0004606,FBgn0000182,FBgn0031903,FBgn0004795,FBgn0000179,FBgn0014343,FBgn0000210,FBgn0004360,FBgn0001320,FBgn0003117,FBgn0010575,FBgn0261963,FBgn0261573,FBgn0004885,FBgn0264442,FBgn0004878,FBgn0005624,FBgn0038197,FBgn0025639,FBgn0040318,FBg…
GO:0051716	cellular response to stimulus	biological_process	2.7137e-11	2.8197e-09	76	259	1692	12231	FBgn0000413,FBgn0011817,FBgn0032388,FBgn0004842,FBgn0264089,FBgn0004635,FBgn0010470,FBgn0003118,FBgn0038035,FBgn0261573,FBgn0041604,FBgn0262562,FBgn0003392,FBgn0023172,FBgn0264490,FBgn0003117,FBgn0025631,FBgn0259685,FBgn0004360,FBgn0000210,FBgn0261451,FBgn0000479,FBgn0259145,FBgn0001319,FBgn0086901,FBgn0041723,FBgn0039054,FBgn0039932,FBgn0001075,FBgn0262738,FBgn0263111,FBgn0001139,FBgn0038880,FBg…
GO:0034654	nucleobase-containing compound biosynthetic process	biological_process	2.7461e-11	2.8232e-09	57	259	1070	12231	FBgn0003499,FBgn0000210,FBgn0004360,FBgn0001320,FBgn0264490,FBgn0003117,FBgn0001138,FBgn0045852,FBgn0261963,FBgn0003118,FBgn0261573,FBgn0038035,FBgn0263772,FBgn0024288,FBgn0023091,FBgn0010575,FBgn0015919,FBgn0262975,FBgn0004878,FBgn0262139,FBgn0000413,FBgn0264442,FBgn0041092,FBgn0025639,FBgn0038197,FBgn0005636,FBgn0040318,FBgn0005630,FBgn0005624,FBgn0011481,FBgn0041111,FBgn0020307,FBgn0019650,FBg…
GO:0006366	transcription from RNA polymerase II promoter	biological_process	7.0304e-11	7.1527e-09	36	259	499	12231	FBgn0001138,FBgn0003117,FBgn0264490,FBgn0001320,FBgn0000210,FBgn0004360,FBgn0005630,FBgn0038197,FBgn0040318,FBgn0264442,FBgn0000413,FBgn0004878,FBgn0262975,FBgn0262139,FBgn0015919,FBgn0010575,FBgn0023091,FBgn0261573,FBgn0261963,FBgn0003118,FBgn0020309,FBgn0000448,FBgn0013531,FBgn0001139,FBgn0004859,FBgn0019650,FBgn0020307,FBgn0031903,FBgn0004795,FBgn0259234,FBgn0000179,FBgn0001319,FBgn0014343,FBg…
GO:0031323	regulation of cellular metabolic process	biological_process	1.7185e-10	1.7303e-08	65	259	1382	12231	FBgn0086675,FBgn0019650,FBgn0028990,FBgn0004859,FBgn0001139,FBgn0260753,FBgn0038826,FBgn0020309,FBgn0039932,FBgn0086613,FBgn0262477,FBgn0267791,FBgn0004606,FBgn0016694,FBgn0261723,FBgn0001319,FBgn0004795,FBgn0004587,FBgn0259685,FBgn0004360,FBgn0000210,FBgn0264490,FBgn0003117,FBgn0001138,FBgn0003118,FBgn0261573,FBgn0023091,FBgn0024288,FBgn0263772,FBgn0015919,FBgn0004878,FBgn0262975,FBgn0032388,FBg…
GO:0023051	regulation of signaling	biological_process	1.9676e-10	1.961e-08	41	259	651	12231	FBgn0003118,FBgn0261573,FBgn0010575,FBgn0041604,FBgn0023091,FBgn0262562,FBgn0003392,FBgn0011817,FBgn0038975,FBgn0032388,FBgn0004635,FBgn0038197,FBgn0263706,FBgn0010470,FBgn0085390,FBgn0259685,FBgn0261451,FBgn0013469,FBgn0023172,FBgn0260003,FBgn0043070,FBgn0029791,FBgn0085432,FBgn0039932,FBgn0001075,FBgn0038837,FBgn0262738,FBgn0264707,FBgn0000479,FBgn0086901,FBgn0001319,FBgn0259234,FBgn0041723,FBg…
GO:0016070	RNA metabolic process	biological_process	2.1848e-10	2.1555e-08	65	259	1390	12231	FBgn0261963,FBgn0010575,FBgn0039920,FBgn0038197,FBgn0025639,FBgn0005630,FBgn0005624,FBgn0262139,FBgn0041092,FBgn0003499,FBgn0045852,FBgn0001320,FBgn0005677,FBgn0085432,FBgn0000179,FBgn0014343,FBgn0031903,FBgn0259234,FBgn0004914,FBgn0260397,FBgn0030738,FBgn0000114,FBgn0041111,FBgn0011481,FBgn0020307,FBgn0035849,FBgn0013531,FBgn0000448,FBgn0015919,FBgn0038035,FBgn0003118,FBgn0261573,FBgn0263772,FBg…
GO:0019438	aromatic compound biosynthetic process	biological_process	2.7238e-10	2.6603e-08	57	259	1136	12231	FBgn0085432,FBgn0086613,FBgn0039932,FBgn0005677,FBgn0262477,FBgn0004606,FBgn0016694,FBgn0000179,FBgn0001319,FBgn0261723,FBgn0014343,FBgn0031903,FBgn0259234,FBgn0004795,FBgn0041111,FBgn0011481,FBgn0020307,FBgn0019650,FBgn0004914,FBgn0260397,FBgn0004859,FBgn0030738,FBgn0013531,FBgn0001139,FBgn0260753,FBgn0000448,FBgn0020309,FBgn0035849,FBgn0261963,FBgn0261573,FBgn0003118,FBgn0038035,FBgn0024288,FBg…
GO:0018130	heterocycle biosynthetic process	biological_process	3.0076e-10	2.9084e-08	57	259	1139	12231	FBgn0264490,FBgn0001320,FBgn0001138,FBgn0045852,FBgn0003117,FBgn0003499,FBgn0000210,FBgn0004360,FBgn0000413,FBgn0264442,FBgn0041092,FBgn0004878,FBgn0262975,FBgn0262139,FBgn0005630,FBgn0005624,FBgn0038197,FBgn0025639,FBgn0005636,FBgn0040318,FBgn0024288,FBgn0263772,FBgn0023091,FBgn0010575,FBgn0261963,FBgn0038035,FBgn0261573,FBgn0003118,FBgn0015919,FBgn0260753,FBgn0000448,FBgn0013531,FBgn0001139,FBg…
GO:0010646	regulation of cell communication	biological_process	3.1014e-10	2.9697e-08	41	259	661	12231	FBgn0038975,FBgn0032388,FBgn0011817,FBgn0010470,FBgn0038197,FBgn0263706,FBgn0004635,FBgn0023091,FBgn0041604,FBgn0010575,FBgn0003118,FBgn0261573,FBgn0003392,FBgn0262562,FBgn0023172,FBgn0043070,FBgn0260003,FBgn0085390,FBgn0013469,FBgn0261451,FBgn0259685,FBgn0000479,FBgn0264707,FBgn0041723,FBgn0259234,FBgn0086901,FBgn0001319,FBgn0039932,FBgn0085432,FBgn0029791,FBgn0262738,FBgn0038837,FBgn0001075,FBg…
GO:0009987	cellular process	biological_process	3.3019e-10	3.1311e-08	188	259	6628	12231	FBgn0086901,FBgn0261723,FBgn0004587,FBgn0004795,FBgn0264695,FBgn0034145,FBgn0267791,FBgn0262477,FBgn0001075,FBgn0034247,FBgn0052666,FBgn0259170,FBgn0000108,FBgn0263111,FBgn0260753,FBgn0020309,FBgn0029881,FBgn0027844,FBgn0038826,FBgn0028369,FBgn0260964,FBgn0265991,FBgn0004859,FBgn0034636,FBgn0262975,FBgn0004878,FBgn0264442,FBgn0038975,FBgn0011817,FBgn0032388,FBgn0264089,FBgn0003118,FBgn0038652,FBg…
GO:0010558	negative regulation of macromolecule biosynthetic process	biological_process	3.7449e-10	3.4835e-08	28	259	334	12231	FBgn0020309,FBgn0003117,FBgn0000448,FBgn0001320,FBgn0001139,FBgn0004859,FBgn0000114,FBgn0004360,FBgn0020307,FBgn0031903,FBgn0004795,FBgn0005624,FBgn0038197,FBgn0025639,FBgn0000179,FBgn0040318,FBgn0014343,FBgn0264442,FBgn0004878,FBgn0004606,FBgn0000182,FBgn0086613,FBgn0039932,FBgn0010575,FBgn0264001,FBgn0261963,FBgn0261573,FBgn0085432
GO:2000113	negative regulation of cellular macromolecule biosynthetic process	biological_process	3.7449e-10	3.4835e-08	28	259	334	12231	FBgn0085432,FBgn0264001,FBgn0261573,FBgn0261963,FBgn0010575,FBgn0086613,FBgn0039932,FBgn0004606,FBgn0000182,FBgn0004878,FBgn0264442,FBgn0040318,FBgn0014343,FBgn0025639,FBgn0038197,FBgn0000179,FBgn0004795,FBgn0005624,FBgn0031903,FBgn0020307,FBgn0004360,FBgn0000114,FBgn0004859,FBgn0001320,FBgn0001139,FBgn0000448,FBgn0003117,FBgn0020309
GO:0000122	negative regulation of transcription from RNA polymerase II promoter	biological_process	5.679e-10	5.2327e-08	19	259	154	12231	FBgn0004360,FBgn0004859,FBgn0020307,FBgn0003117,FBgn0001320,FBgn0001139,FBgn0000448,FBgn0261573,FBgn0261963,FBgn0010575,FBgn0039932,FBgn0014343,FBgn0040318,FBgn0000179,FBgn0038197,FBgn0004795,FBgn0031903,FBgn0004606,FBgn0264442
GO:0009890	negative regulation of biosynthetic process	biological_process	6.389e-10	5.7779e-08	28	259	342	12231	FBgn0264442,FBgn0004878,FBgn0004606,FBgn0000182,FBgn0031903,FBgn0004795,FBgn0005624,FBgn0025639,FBgn0038197,FBgn0000179,FBgn0040318,FBgn0014343,FBgn0086613,FBgn0039932,FBgn0010575,FBgn0261573,FBgn0264001,FBgn0261963,FBgn0085432,FBgn0000448,FBgn0001139,FBgn0001320,FBgn0020309,FBgn0003117,FBgn0020307,FBgn0004859,FBgn0004360,FBgn0000114
GO:0031327	negative regulation of cellular biosynthetic process	biological_process	6.389e-10	5.7779e-08	28	259	342	12231	FBgn0004859,FBgn0004360,FBgn0000114,FBgn0020307,FBgn0020309,FBgn0003117,FBgn0000448,FBgn0001320,FBgn0001139,FBgn0086613,FBgn0039932,FBgn0010575,FBgn0261963,FBgn0264001,FBgn0261573,FBgn0085432,FBgn0031903,FBgn0004795,FBgn0005624,FBgn0025639,FBgn0038197,FBgn0000179,FBgn0040318,FBgn0014343,FBgn0264442,FBgn0004878,FBgn0004606,FBgn0000182
GO:0048519	negative regulation of biological process	biological_process	8.2409e-10	7.3843e-08	54	259	1074	12231	FBgn0031903,FBgn0004795,FBgn0086901,FBgn0264272,FBgn0000179,FBgn0014343,FBgn0004606,FBgn0000182,FBgn0262738,FBgn0263974,FBgn0001075,FBgn0005677,FBgn0039932,FBgn0086613,FBgn0264001,FBgn0085432,FBgn0029791,FBgn0020309,FBgn0029881,FBgn0000448,FBgn0000108,FBgn0040271,FBgn0001139,FBgn0004859,FBgn0000114,FBgn0261570,FBgn0260397,FBgn0028990,FBgn0020307,FBgn0005624,FBgn0028397,FBgn0038197,FBgn0025639,FBg…
GO:1901362	organic cyclic compound biosynthetic process	biological_process	8.9788e-10	7.9724e-08	57	259	1173	12231	FBgn0003499,FBgn0000210,FBgn0004360,FBgn0264490,FBgn0001320,FBgn0001138,FBgn0045852,FBgn0003117,FBgn0024288,FBgn0263772,FBgn0010575,FBgn0023091,FBgn0261963,FBgn0003118,FBgn0261573,FBgn0038035,FBgn0015919,FBgn0264442,FBgn0000413,FBgn0041092,FBgn0262975,FBgn0004878,FBgn0262139,FBgn0005630,FBgn0005624,FBgn0005636,FBgn0038197,FBgn0025639,FBgn0040318,FBgn0019650,FBgn0041111,FBgn0011481,FBgn0020307,FBg…
GO:0007423	sensory organ development	biological_process	1.1381e-09	1.0014e-07	33	259	474	12231	FBgn0259685,FBgn0000210,FBgn0013469,FBgn0034070,FBgn0003117,FBgn0086898,FBgn0045852,FBgn0015919,FBgn0003392,FBgn0003118,FBgn0041604,FBgn0038197,FBgn0005636,FBgn0005630,FBgn0028704,FBgn0010470,FBgn0264442,FBgn0000413,FBgn0011817,FBgn0004449,FBgn0004859,FBgn0028369,FBgn0041111,FBgn0019650,FBgn0000497,FBgn0029157,FBgn0005677,FBgn0001075,FBgn0262738,FBgn0266098,FBgn0000179,FBgn0014343,FBgn0031903
GO:0000981	RNA polymerase II transcription factor activity, sequence-specific DNA binding	molecular_function	1.3171e-09	1.1486e-07	20	259	180	12231	FBgn0003117,FBgn0035849,FBgn0001138,FBgn0001320,FBgn0000448,FBgn0004914,FBgn0004859,FBgn0019650,FBgn0038197,FBgn0040318,FBgn0014343,FBgn0259234,FBgn0004606,FBgn0262139,FBgn0000413,FBgn0016694,FBgn0015919,FBgn0261963,FBgn0003118,FBgn0085432
GO:0010605	negative regulation of macromolecule metabolic process	biological_process	1.3947e-09	1.2055e-07	36	259	557	12231	FBgn0005624,FBgn0040318,FBgn0004635,FBgn0038197,FBgn0025639,FBgn0004885,FBgn0264442,FBgn0004878,FBgn0010575,FBgn0261963,FBgn0261573,FBgn0003117,FBgn0001320,FBgn0004360,FBgn0000210,FBgn0259685,FBgn0004795,FBgn0031903,FBgn0014343,FBgn0000179,FBgn0000182,FBgn0004606,FBgn0005677,FBgn0263974,FBgn0039932,FBgn0086613,FBgn0085432,FBgn0264001,FBgn0020309,FBgn0000448,FBgn0001139,FBgn0000114,FBgn0004859,FBg…
GO:0045892	negative regulation of transcription, DNA-templated	biological_process	2.1508e-09	1.8107e-07	25	259	289	12231	FBgn0020307,FBgn0004360,FBgn0004859,FBgn0001139,FBgn0001320,FBgn0000448,FBgn0003117,FBgn0020309,FBgn0085432,FBgn0261963,FBgn0261573,FBgn0010575,FBgn0039932,FBgn0086613,FBgn0004606,FBgn0004878,FBgn0264442,FBgn0040318,FBgn0014343,FBgn0025639,FBgn0038197,FBgn0000179,FBgn0004795,FBgn0005624,FBgn0031903
GO:1902679	negative regulation of RNA biosynthetic process	biological_process	2.1508e-09	1.8107e-07	25	259	289	12231	FBgn0005624,FBgn0004795,FBgn0031903,FBgn0040318,FBgn0014343,FBgn0000179,FBgn0038197,FBgn0025639,FBgn0264442,FBgn0004606,FBgn0004878,FBgn0010575,FBgn0039932,FBgn0086613,FBgn0085432,FBgn0261963,FBgn0261573,FBgn0003117,FBgn0020309,FBgn0000448,FBgn0001139,FBgn0001320,FBgn0004360,FBgn0004859,FBgn0020307
GO:1903507	negative regulation of nucleic acid-templated transcription	biological_process	2.1508e-09	1.8107e-07	25	259	289	12231	FBgn0039932,FBgn0086613,FBgn0010575,FBgn0261573,FBgn0261963,FBgn0085432,FBgn0264442,FBgn0004878,FBgn0004606,FBgn0031903,FBgn0005624,FBgn0004795,FBgn0038197,FBgn0025639,FBgn0000179,FBgn0014343,FBgn0040318,FBgn0020307,FBgn0004859,FBgn0004360,FBgn0000448,FBgn0001320,FBgn0001139,FBgn0020309,FBgn0003117
GO:0051172	negative regulation of nitrogen compound metabolic process	biological_process	2.169e-09	1.8107e-07	28	259	358	12231	FBgn0000448,FBgn0001139,FBgn0001320,FBgn0020309,FBgn0003117,FBgn0020307,FBgn0004859,FBgn0000114,FBgn0004360,FBgn0264442,FBgn0004878,FBgn0004606,FBgn0000182,FBgn0031903,FBgn0005624,FBgn0004795,FBgn0038197,FBgn0025639,FBgn0000179,FBgn0014343,FBgn0040318,FBgn0039932,FBgn0086613,FBgn0010575,FBgn0264001,FBgn0261963,FBgn0261573,FBgn0085432
GO:0006928	movement of cell or subcellular component	biological_process	2.8773e-09	2.3816e-07	37	259	600	12231	FBgn0040271,FBgn0264693,FBgn0033791,FBgn0020299,FBgn0004449,FBgn0260660,FBgn0004606,FBgn0000182,FBgn0028645,FBgn0086901,FBgn0039704,FBgn0261723,FBgn0014343,FBgn0004795,FBgn0264695,FBgn0085408,FBgn0005677,FBgn0001320,FBgn0023172,FBgn0001138,FBgn0261563,FBgn0003499,FBgn0038498,FBgn0261451,FBgn0019968,FBgn0004885,FBgn0264442,FBgn0041092,FBgn0005636,FBgn0264089,FBgn0005630,FBgn0005624,FBgn0261963,FBg…
GO:0001654	eye development	biological_process	3.1571e-09	2.5912e-07	28	259	364	12231	FBgn0003118,FBgn0041604,FBgn0005677,FBgn0001075,FBgn0015919,FBgn0262738,FBgn0003392,FBgn0011817,FBgn0000413,FBgn0014343,FBgn0038197,FBgn0266098,FBgn0000179,FBgn0031903,FBgn0005630,FBgn0028704,FBgn0034070,FBgn0041111,FBgn0028369,FBgn0019650,FBgn0004449,FBgn0259685,FBgn0013469,FBgn0000210,FBgn0004859,FBgn0029157,FBgn0086898,FBgn0000497
GO:0042221	response to chemical	biological_process	3.4912e-09	2.8415e-07	47	259	898	12231	FBgn0039932,FBgn0262738,FBgn0259170,FBgn0005677,FBgn0016694,FBgn0028645,FBgn0000479,FBgn0004606,FBgn0004795,FBgn0261723,FBgn0014343,FBgn0266098,FBgn0020299,FBgn0260964,FBgn0028990,FBgn0041111,FBgn0260660,FBgn0004449,FBgn0004914,FBgn0000448,FBgn0040271,FBgn0035849,FBgn0033791,FBgn0041604,FBgn0010575,FBgn0261963,FBgn0003392,FBgn0032151,FBgn0004885,FBgn0264442,FBgn0016926,FBgn0005624,FBgn0005630,FBg…
GO:0009966	regulation of signal transduction	biological_process	3.5246e-09	2.8451e-07	36	259	577	12231	FBgn0013469,FBgn0261451,FBgn0259685,FBgn0085390,FBgn0043070,FBgn0023172,FBgn0003392,FBgn0262562,FBgn0010575,FBgn0041604,FBgn0003118,FBgn0261573,FBgn0010470,FBgn0004635,FBgn0038197,FBgn0263706,FBgn0011817,FBgn0032388,FBgn0260660,FBgn0260397,FBgn0261570,FBgn0029881,FBgn0020309,FBgn0001139,FBgn0040271,FBgn0262738,FBgn0001075,FBgn0039932,FBgn0085432,FBgn0029791,FBgn0259234,FBgn0041723,FBgn0086901,FBg…
GO:0051253	negative regulation of RNA metabolic process	biological_process	4.9409e-09	3.9555e-07	25	259	301	12231	FBgn0004859,FBgn0004360,FBgn0020307,FBgn0020309,FBgn0003117,FBgn0001320,FBgn0001139,FBgn0000448,FBgn0261573,FBgn0261963,FBgn0085432,FBgn0039932,FBgn0086613,FBgn0010575,FBgn0000179,FBgn0038197,FBgn0025639,FBgn0040318,FBgn0014343,FBgn0031903,FBgn0005624,FBgn0004795,FBgn0004878,FBgn0004606,FBgn0264442
GO:0048749	compound eye development	biological_process	5.1099e-09	4.0576e-07	27	259	348	12231	FBgn0001075,FBgn0005677,FBgn0015919,FBgn0262738,FBgn0003392,FBgn0003118,FBgn0041604,FBgn0014343,FBgn0266098,FBgn0038197,FBgn0000179,FBgn0005630,FBgn0031903,FBgn0028704,FBgn0011817,FBgn0000413,FBgn0004449,FBgn0259685,FBgn0013469,FBgn0000210,FBgn0034070,FBgn0028369,FBgn0041111,FBgn0019650,FBgn0086898,FBgn0000497,FBgn0029157
GO:0009892	negative regulation of metabolic process	biological_process	5.491e-09	4.3251e-07	36	259	587	12231	FBgn0260397,FBgn0000114,FBgn0004859,FBgn0020307,FBgn0028990,FBgn0020309,FBgn0001139,FBgn0000448,FBgn0263974,FBgn0005677,FBgn0085432,FBgn0264001,FBgn0086613,FBgn0039932,FBgn0014343,FBgn0000179,FBgn0004795,FBgn0031903,FBgn0000182,FBgn0004606,FBgn0259685,FBgn0004360,FBgn0000210,FBgn0003117,FBgn0001320,FBgn0261573,FBgn0261963,FBgn0010575,FBgn0040318,FBgn0004635,FBgn0038197,FBgn0025639,FBgn0005624,FBg…
GO:0043565	sequence-specific DNA binding	molecular_function	6.4551e-09	5.0438e-07	25	259	305	12231	FBgn0261723,FBgn0014343,FBgn0040318,FBgn0038197,FBgn0004795,FBgn0262139,FBgn0004606,FBgn0262975,FBgn0016694,FBgn0000413,FBgn0262477,FBgn0015919,FBgn0085432,FBgn0261963,FBgn0003118,FBgn0003117,FBgn0001138,FBgn0035849,FBgn0001320,FBgn0000448,FBgn0004914,FBgn0000210,FBgn0004859,FBgn0020307,FBgn0019650
GO:0009605	response to external stimulus	biological_process	7.8783e-09	6.1069e-07	43	259	799	12231	FBgn0004606,FBgn0028645,FBgn0016694,FBgn0014343,FBgn0261723,FBgn0001319,FBgn0259234,FBgn0004795,FBgn0005677,FBgn0262738,FBgn0040271,FBgn0263111,FBgn0260753,FBgn0033791,FBgn0028990,FBgn0004449,FBgn0260660,FBgn0263873,FBgn0267727,FBgn0011817,FBgn0264442,FBgn0004885,FBgn0264089,FBgn0052423,FBgn0000024,FBgn0005636,FBgn0038197,FBgn0032593,FBgn0005624,FBgn0005630,FBgn0261963,FBgn0010575,FBgn0041604,FBg…
GO:0048583	regulation of response to stimulus	biological_process	8.1341e-09	6.2556e-07	43	259	800	12231	FBgn0043070,FBgn0003117,FBgn0263397,FBgn0023172,FBgn0013469,FBgn0261451,FBgn0259685,FBgn0085390,FBgn0034070,FBgn0010470,FBgn0004635,FBgn0038197,FBgn0263706,FBgn0011817,FBgn0032388,FBgn0016926,FBgn0003392,FBgn0262562,FBgn0010575,FBgn0041604,FBgn0003118,FBgn0261573,FBgn0020309,FBgn0029881,FBgn0260753,FBgn0040271,FBgn0001139,FBgn0260660,FBgn0261570,FBgn0260397,FBgn0028990,FBgn0266418,FBgn0259234,FBg…
GO:0010467	gene expression	biological_process	1.0677e-08	8.1472e-07	71	259	1746	12231	FBgn0020309,FBgn0038826,FBgn0039260,FBgn0001139,FBgn0004859,FBgn0019650,FBgn0004587,FBgn0004795,FBgn0001319,FBgn0261723,FBgn0016694,FBgn0004606,FBgn0004509,FBgn0267791,FBgn0262477,FBgn0263974,FBgn0039932,FBgn0086613,FBgn0001138,FBgn0003117,FBgn0264490,FBgn0000210,FBgn0004360,FBgn0032194,FBgn0005636,FBgn0040318,FBgn0004635,FBgn0000413,FBgn0264442,FBgn0032388,FBgn0004878,FBgn0262975,FBgn0015919,FBg…
GO:0048592	eye morphogenesis	biological_process	1.1375e-08	8.5463e-07	24	259	290	12231	FBgn0086898,FBgn0000497,FBgn0259685,FBgn0004449,FBgn0004859,FBgn0013469,FBgn0000210,FBgn0028369,FBgn0041111,FBgn0034070,FBgn0000179,FBgn0266098,FBgn0038197,FBgn0014343,FBgn0031903,FBgn0005630,FBgn0000413,FBgn0011817,FBgn0015919,FBgn0005677,FBgn0001075,FBgn0003392,FBgn0262738,FBgn0003118
GO:0090596	sensory organ morphogenesis	biological_process	1.1375e-08	8.5463e-07	24	259	290	12231	FBgn0014343,FBgn0000179,FBgn0266098,FBgn0038197,FBgn0005630,FBgn0031903,FBgn0011817,FBgn0000413,FBgn0001075,FBgn0005677,FBgn0015919,FBgn0262738,FBgn0003392,FBgn0003118,FBgn0086898,FBgn0000497,FBgn0004449,FBgn0259685,FBgn0013469,FBgn0000210,FBgn0004859,FBgn0034070,FBgn0028369,FBgn0041111
GO:0044459	plasma membrane part	cellular_component	1.2181e-08	9.0819e-07	34	259	544	12231	FBgn0039928,FBgn0263111,FBgn0025391,FBgn0038880,FBgn0260753,FBgn0259822,FBgn0000497,FBgn0262869,FBgn0261260,FBgn0004449,FBgn0000182,FBgn0263219,FBgn0083975,FBgn0028645,FBgn0086901,FBgn0265296,FBgn0264908,FBgn0001075,FBgn0262738,FBgn0023172,FBgn0001624,FBgn0052843,FBgn0260003,FBgn0039709,FBgn0000036,FBgn0259685,FBgn0038498,FBgn0264607,FBgn0004842,FBgn0004635,FBgn0025936,FBgn0082585,FBgn0033494,FBg…
GO:0007411	axon guidance	biological_process	1.2605e-08	9.3268e-07	22	259	247	12231	FBgn0040271,FBgn0001138,FBgn0033791,FBgn0004449,FBgn0038498,FBgn0260660,FBgn0261451,FBgn0004606,FBgn0004885,FBgn0264442,FBgn0028645,FBgn0005636,FBgn0014343,FBgn0264089,FBgn0261723,FBgn0005630,FBgn0005624,FBgn0004795,FBgn0261963,FBgn0041604,FBgn0010575,FBgn0005677
GO:0048523	negative regulation of cellular process	biological_process	1.4314e-08	1.0512e-06	47	259	940	12231	FBgn0004606,FBgn0000182,FBgn0031903,FBgn0004795,FBgn0264272,FBgn0086901,FBgn0000179,FBgn0014343,FBgn0039932,FBgn0086613,FBgn0264001,FBgn0029791,FBgn0085432,FBgn0262738,FBgn0001075,FBgn0000448,FBgn0000108,FBgn0040271,FBgn0001139,FBgn0029881,FBgn0020309,FBgn0028990,FBgn0020307,FBgn0004859,FBgn0000114,FBgn0261570,FBgn0264442,FBgn0011817,FBgn0004878,FBgn0005624,FBgn0028397,FBgn0038197,FBgn0025639,FBg…
GO:0045934	negative regulation of nucleobase-containing compound metabolic process	biological_process	1.4556e-08	1.061e-06	25	259	317	12231	FBgn0020309,FBgn0003117,FBgn0000448,FBgn0001320,FBgn0001139,FBgn0004859,FBgn0004360,FBgn0020307,FBgn0031903,FBgn0005624,FBgn0004795,FBgn0025639,FBgn0038197,FBgn0000179,FBgn0014343,FBgn0040318,FBgn0264442,FBgn0004878,FBgn0004606,FBgn0039932,FBgn0086613,FBgn0010575,FBgn0261573,FBgn0261963,FBgn0085432
GO:0034645	cellular macromolecule biosynthetic process	biological_process	1.8628e-08	1.3477e-06	63	259	1484	12231	FBgn0030738,FBgn0004859,FBgn0000114,FBgn0004914,FBgn0260397,FBgn0019650,FBgn0011481,FBgn0041111,FBgn0020307,FBgn0035849,FBgn0020309,FBgn0038826,FBgn0000448,FBgn0013531,FBgn0001139,FBgn0259170,FBgn0262477,FBgn0005677,FBgn0086613,FBgn0039932,FBgn0264001,FBgn0085432,FBgn0031903,FBgn0259234,FBgn0004795,FBgn0000179,FBgn0001319,FBgn0261723,FBgn0014343,FBgn0016694,FBgn0004606,FBgn0000182,FBgn0000557,FBg…
GO:0001745	compound eye morphogenesis	biological_process	2.1919e-08	1.5741e-06	23	259	277	12231	FBgn0086898,FBgn0000497,FBgn0004449,FBgn0259685,FBgn0000210,FBgn0013469,FBgn0034070,FBgn0028369,FBgn0041111,FBgn0014343,FBgn0266098,FBgn0000179,FBgn0038197,FBgn0005630,FBgn0031903,FBgn0011817,FBgn0000413,FBgn0005677,FBgn0001075,FBgn0015919,FBgn0262738,FBgn0003392,FBgn0003118
GO:0097485	neuron projection guidance	biological_process	2.253e-08	1.6062e-06	22	259	255	12231	FBgn0005630,FBgn0004795,FBgn0005624,FBgn0005636,FBgn0264089,FBgn0261723,FBgn0014343,FBgn0264442,FBgn0004885,FBgn0028645,FBgn0004606,FBgn0005677,FBgn0041604,FBgn0010575,FBgn0261963,FBgn0001138,FBgn0033791,FBgn0040271,FBgn0038498,FBgn0260660,FBgn0261451,FBgn0004449
GO:0009059	macromolecule biosynthetic process	biological_process	2.2726e-08	1.6085e-06	63	259	1492	12231	FBgn0000448,FBgn0001139,FBgn0013531,FBgn0035849,FBgn0038826,FBgn0020309,FBgn0019650,FBgn0020307,FBgn0041111,FBgn0011481,FBgn0000114,FBgn0030738,FBgn0004859,FBgn0260397,FBgn0004914,FBgn0016694,FBgn0000182,FBgn0004606,FBgn0004795,FBgn0259234,FBgn0031903,FBgn0261723,FBgn0014343,FBgn0001319,FBgn0000179,FBgn0039932,FBgn0086613,FBgn0085432,FBgn0264001,FBgn0259170,FBgn0262477,FBgn0005677,FBgn0264490,FBg…
GO:0070491	repressing transcription factor binding	molecular_function	2.7966e-08	1.965e-06	7	259	17	12231	FBgn0085432,FBgn0001320,FBgn0001139,FBgn0003118,FBgn0004795,FBgn0003117,FBgn0040318
GO:0090304	nucleic acid metabolic process	biological_process	3.2738e-08	2.284e-06	65	259	1578	12231	FBgn0032194,FBgn0004360,FBgn0000210,FBgn0264490,FBgn0003117,FBgn0001138,FBgn0003118,FBgn0261573,FBgn0038035,FBgn0023091,FBgn0024288,FBgn0263772,FBgn0015919,FBgn0004878,FBgn0262975,FBgn0032388,FBgn0264442,FBgn0000413,FBgn0040318,FBgn0005636,FBgn0086675,FBgn0019650,FBgn0004859,FBgn0001139,FBgn0039260,FBgn0038826,FBgn0020309,FBgn0086613,FBgn0039932,FBgn0262477,FBgn0267791,FBgn0004606,FBgn0016694,FBg…
GO:0044271	cellular nitrogen compound biosynthetic process	biological_process	3.5292e-08	2.4447e-06	63	259	1510	12231	FBgn0015919,FBgn0261963,FBgn0038035,FBgn0261573,FBgn0003118,FBgn0023091,FBgn0010575,FBgn0263772,FBgn0024288,FBgn0040318,FBgn0025639,FBgn0038197,FBgn0005636,FBgn0005624,FBgn0005630,FBgn0262139,FBgn0262975,FBgn0004878,FBgn0041092,FBgn0000559,FBgn0000413,FBgn0264442,FBgn0000210,FBgn0004360,FBgn0000557,FBgn0003499,FBgn0003117,FBgn0045852,FBgn0001138,FBgn0001320,FBgn0264490,FBgn0262477,FBgn0005677,FBg…
GO:0050793	regulation of developmental process	biological_process	3.5787e-08	2.4615e-06	35	259	595	12231	FBgn0010575,FBgn0041604,FBgn0003118,FBgn0261963,FBgn0038197,FBgn0264089,FBgn0011817,FBgn0262975,FBgn0004878,FBgn0264607,FBgn0013469,FBgn0000210,FBgn0259685,FBgn0261563,FBgn0045852,FBgn0001624,FBgn0023172,FBgn0052666,FBgn0262738,FBgn0001075,FBgn0086613,FBgn0085432,FBgn0264272,FBgn0086901,FBgn0001319,FBgn0039704,FBgn0004859,FBgn0000114,FBgn0004449,FBgn0261260,FBgn0028369,FBgn0000497,FBgn0000448,FBg…
GO:0048522	positive regulation of cellular process	biological_process	4.2899e-08	2.9225e-06	45	259	911	12231	FBgn0000413,FBgn0038975,FBgn0011817,FBgn0032388,FBgn0262975,FBgn0262139,FBgn0005630,FBgn0038197,FBgn0263706,FBgn0040318,FBgn0264089,FBgn0004635,FBgn0023091,FBgn0041604,FBgn0261963,FBgn0003118,FBgn0261573,FBgn0003392,FBgn0015919,FBgn0262562,FBgn0001624,FBgn0264490,FBgn0023172,FBgn0043070,FBgn0003117,FBgn0000210,FBgn0261451,FBgn0013469,FBgn0259685,FBgn0016694,FBgn0259234,FBgn0004795,FBgn0001319,FBg…
GO:0007389	pattern specification process	biological_process	4.3088e-08	2.9225e-06	32	259	516	12231	FBgn0010575,FBgn0041604,FBgn0003118,FBgn0261963,FBgn0015919,FBgn0011817,FBgn0262975,FBgn0038197,FBgn0264089,FBgn0004635,FBgn0013469,FBgn0004360,FBgn0001320,FBgn0003117,FBgn0260003,FBgn0039932,FBgn0003382,FBgn0085432,FBgn0005677,FBgn0001075,FBgn0031903,FBgn0004795,FBgn0001319,FBgn0000179,FBgn0028990,FBgn0041111,FBgn0020307,FBgn0004859,FBgn0260397,FBgn0040271,FBgn0000497,FBgn0038826
GO:0045935	positive regulation of nucleobase-containing compound metabolic process	biological_process	4.4069e-08	2.9684e-06	24	259	311	12231	FBgn0004859,FBgn0000210,FBgn0019650,FBgn0003117,FBgn0260753,FBgn0264490,FBgn0000448,FBgn0015919,FBgn0261573,FBgn0261963,FBgn0003118,FBgn0085432,FBgn0023091,FBgn0038197,FBgn0001319,FBgn0040318,FBgn0014343,FBgn0005630,FBgn0259234,FBgn0004795,FBgn0262975,FBgn0262139,FBgn0000413,FBgn0016694
GO:0045893	positive regulation of transcription, DNA-templated	biological_process	4.8474e-08	3.199e-06	23	259	289	12231	FBgn0000413,FBgn0016694,FBgn0262975,FBgn0262139,FBgn0005630,FBgn0259234,FBgn0004795,FBgn0001319,FBgn0038197,FBgn0040318,FBgn0014343,FBgn0023091,FBgn0261573,FBgn0261963,FBgn0003118,FBgn0085432,FBgn0015919,FBgn0264490,FBgn0000448,FBgn0003117,FBgn0019650,FBgn0004859,FBgn0000210
GO:1902680	positive regulation of RNA biosynthetic process	biological_process	4.8474e-08	3.199e-06	23	259	289	12231	FBgn0023091,FBgn0085432,FBgn0003118,FBgn0261963,FBgn0261573,FBgn0015919,FBgn0016694,FBgn0000413,FBgn0262139,FBgn0262975,FBgn0004795,FBgn0259234,FBgn0005630,FBgn0040318,FBgn0014343,FBgn0038197,FBgn0001319,FBgn0019650,FBgn0000210,FBgn0004859,FBgn0000448,FBgn0264490,FBgn0003117
GO:1903508	positive regulation of nucleic acid-templated transcription	biological_process	4.8474e-08	3.199e-06	23	259	289	12231	FBgn0264490,FBgn0000448,FBgn0003117,FBgn0019650,FBgn0004859,FBgn0000210,FBgn0262975,FBgn0262139,FBgn0000413,FBgn0016694,FBgn0001319,FBgn0038197,FBgn0014343,FBgn0040318,FBgn0005630,FBgn0259234,FBgn0004795,FBgn0261573,FBgn0261963,FBgn0003118,FBgn0085432,FBgn0023091,FBgn0015919
GO:0006935	chemotaxis	biological_process	5.5451e-08	3.6349e-06	22	259	268	12231	FBgn0261963,FBgn0010575,FBgn0041604,FBgn0005677,FBgn0004606,FBgn0004885,FBgn0264442,FBgn0028645,FBgn0005636,FBgn0014343,FBgn0264089,FBgn0261723,FBgn0005630,FBgn0005624,FBgn0004795,FBgn0004449,FBgn0038498,FBgn0261451,FBgn0260660,FBgn0040271,FBgn0001138,FBgn0033791
GO:0051254	positive regulation of RNA metabolic process	biological_process	6.6473e-08	4.3283e-06	23	259	294	12231	FBgn0040318,FBgn0014343,FBgn0001319,FBgn0038197,FBgn0259234,FBgn0004795,FBgn0005630,FBgn0262139,FBgn0262975,FBgn0016694,FBgn0000413,FBgn0015919,FBgn0085432,FBgn0261963,FBgn0261573,FBgn0003118,FBgn0023091,FBgn0003117,FBgn0000448,FBgn0264490,FBgn0000210,FBgn0004859,FBgn0019650
GO:0007155	cell adhesion	biological_process	7.1616e-08	4.6322e-06	20	259	227	12231	FBgn0001624,FBgn0039928,FBgn0000497,FBgn0020309,FBgn0039709,FBgn0028369,FBgn0261563,FBgn0260660,FBgn0038498,FBgn0004449,FBgn0028645,FBgn0263219,FBgn0053531,FBgn0264089,FBgn0004635,FBgn0265296,FBgn0262509,FBgn0003118,FBgn0052666,FBgn0001075
GO:0031226	intrinsic component of plasma membrane	cellular_component	7.6942e-08	4.944e-06	22	259	273	12231	FBgn0004635,FBgn0264908,FBgn0025936,FBgn0265296,FBgn0004842,FBgn0000182,FBgn0083975,FBgn0028645,FBgn0263219,FBgn0001075,FBgn0032151,FBgn0033494,FBgn0000497,FBgn0038880,FBgn0039928,FBgn0052843,FBgn0260753,FBgn0004449,FBgn0038498,FBgn0262869,FBgn0000036,FBgn0039709
GO:0045944	positive regulation of transcription from RNA polymerase II promoter	biological_process	8.0111e-08	5.114e-06	19	259	207	12231	FBgn0003117,FBgn0264490,FBgn0000448,FBgn0004859,FBgn0000210,FBgn0019650,FBgn0001319,FBgn0038197,FBgn0040318,FBgn0259234,FBgn0262975,FBgn0262139,FBgn0000413,FBgn0015919,FBgn0261963,FBgn0003118,FBgn0261573,FBgn0085432,FBgn0023091
GO:0061061	muscle structure development	biological_process	1.0977e-07	6.9621e-06	20	259	233	12231	FBgn0015919,FBgn0003118,FBgn0264695,FBgn0004795,FBgn0001319,FBgn0038197,FBgn0005636,FBgn0264442,FBgn0033504,FBgn0004606,FBgn0000210,FBgn0004360,FBgn0003499,FBgn0265991,FBgn0028369,FBgn0260003,FBgn0264693,FBgn0265356,FBgn0025391,FBgn0001320
GO:0007163	establishment or maintenance of cell polarity	biological_process	1.2924e-07	8.1435e-06	18	259	192	12231	FBgn0001624,FBgn0000497,FBgn0086898,FBgn0260003,FBgn0261451,FBgn0259685,FBgn0011817,FBgn0262975,FBgn0019968,FBgn0005630,FBgn0031903,FBgn0000633,FBgn0264272,FBgn0014343,FBgn0003118,FBgn0085408,FBgn0015919,FBgn0001075
GO:0001738	morphogenesis of a polarized epithelium	biological_process	1.346e-07	8.4274e-06	14	259	115	12231	FBgn0015919,FBgn0259685,FBgn0001075,FBgn0003392,FBgn0003118,FBgn0085408,FBgn0264272,FBgn0014343,FBgn0086898,FBgn0031903,FBgn0005630,FBgn0000497,FBgn0001624,FBgn0011817
GO:0005887	integral component of plasma membrane	cellular_component	1.3868e-07	8.6276e-06	21	259	259	12231	FBgn0000497,FBgn0260753,FBgn0052843,FBgn0039928,FBgn0038880,FBgn0038498,FBgn0004449,FBgn0039709,FBgn0000036,FBgn0004842,FBgn0265296,FBgn0025936,FBgn0264908,FBgn0004635,FBgn0263219,FBgn0083975,FBgn0028645,FBgn0000182,FBgn0033494,FBgn0001075,FBgn0032151
GO:0048518	positive regulation of biological process	biological_process	1.5563e-07	9.6204e-06	47	259	1019	12231	FBgn0023172,FBgn0264490,FBgn0001624,FBgn0043070,FBgn0003117,FBgn0263397,FBgn0261451,FBgn0000210,FBgn0013469,FBgn0259685,FBgn0000413,FBgn0038975,FBgn0032388,FBgn0011817,FBgn0262975,FBgn0262139,FBgn0005630,FBgn0038197,FBgn0263706,FBgn0264089,FBgn0040318,FBgn0004635,FBgn0041604,FBgn0023091,FBgn0261573,FBgn0261963,FBgn0003118,FBgn0003392,FBgn0015919,FBgn0262562,FBgn0260753,FBgn0000448,FBgn0263111,FBg…
GO:0048732	gland development	biological_process	1.6231e-07	9.9703e-06	15	259	135	12231	FBgn0267727,FBgn0262139,FBgn0004606,FBgn0004795,FBgn0000633,FBgn0033791,FBgn0031903,FBgn0264089,FBgn0004635,FBgn0003117,FBgn0001319,FBgn0085432,FBgn0000210,FBgn0003392,FBgn0259685
GO:0031324	negative regulation of cellular metabolic process	biological_process	1.7313e-07	1.0569e-05	30	259	492	12231	FBgn0000448,FBgn0001320,FBgn0001139,FBgn0003117,FBgn0020309,FBgn0028990,FBgn0020307,FBgn0004360,FBgn0000114,FBgn0004859,FBgn0259685,FBgn0264442,FBgn0004606,FBgn0000182,FBgn0004878,FBgn0005624,FBgn0004795,FBgn0031903,FBgn0040318,FBgn0014343,FBgn0038197,FBgn0000179,FBgn0025639,FBgn0010575,FBgn0039932,FBgn0086613,FBgn0085432,FBgn0261963,FBgn0264001,FBgn0261573
GO:0022610	biological adhesion	biological_process	1.7895e-07	1.0856e-05	20	259	240	12231	FBgn0038498,FBgn0260660,FBgn0004449,FBgn0039709,FBgn0028369,FBgn0261563,FBgn0000497,FBgn0020309,FBgn0001624,FBgn0039928,FBgn0052666,FBgn0001075,FBgn0262509,FBgn0003118,FBgn0265296,FBgn0264089,FBgn0004635,FBgn0053531,FBgn0263219,FBgn0028645
GO:0010557	positive regulation of macromolecule biosynthetic process	biological_process	1.849e-07	1.1148e-05	23	259	311	12231	FBgn0004859,FBgn0000210,FBgn0019650,FBgn0003117,FBgn0264490,FBgn0000448,FBgn0015919,FBgn0003118,FBgn0261963,FBgn0261573,FBgn0085432,FBgn0023091,FBgn0001319,FBgn0038197,FBgn0040318,FBgn0014343,FBgn0005630,FBgn0259234,FBgn0004795,FBgn0262975,FBgn0262139,FBgn0000413,FBgn0016694
GO:2000026	regulation of multicellular organismal development	biological_process	1.9973e-07	1.1968e-05	27	259	414	12231	FBgn0001075,FBgn0262738,FBgn0003118,FBgn0261963,FBgn0041604,FBgn0010575,FBgn0039704,FBgn0264089,FBgn0264272,FBgn0038197,FBgn0086901,FBgn0001319,FBgn0262975,FBgn0011817,FBgn0259685,FBgn0013469,FBgn0004859,FBgn0264607,FBgn0261563,FBgn0028369,FBgn0261260,FBgn0045852,FBgn0000497,FBgn0029157,FBgn0263111,FBgn0001624,FBgn0023172
GO:0003002	regionalization	biological_process	2.1144e-07	1.2593e-05	29	259	469	12231	FBgn0005677,FBgn0015919,FBgn0085432,FBgn0003118,FBgn0261963,FBgn0041604,FBgn0010575,FBgn0039932,FBgn0003382,FBgn0264089,FBgn0004635,FBgn0000179,FBgn0001319,FBgn0004795,FBgn0031903,FBgn0262975,FBgn0011817,FBgn0260397,FBgn0013469,FBgn0004360,FBgn0004859,FBgn0020307,FBgn0041111,FBgn0028990,FBgn0260003,FBgn0003117,FBgn0038826,FBgn0000497,FBgn0001320
GO:0009891	positive regulation of biosynthetic process	biological_process	3.6001e-07	2.1182e-05	24	259	348	12231	FBgn0260753,FBgn0264490,FBgn0000448,FBgn0003117,FBgn0019650,FBgn0004859,FBgn0000210,FBgn0262975,FBgn0262139,FBgn0000413,FBgn0016694,FBgn0001319,FBgn0038197,FBgn0014343,FBgn0040318,FBgn0005630,FBgn0259234,FBgn0004795,FBgn0261963,FBgn0261573,FBgn0003118,FBgn0085432,FBgn0023091,FBgn0015919
GO:0031328	positive regulation of cellular biosynthetic process	biological_process	3.6001e-07	2.1182e-05	24	259	348	12231	FBgn0000210,FBgn0004859,FBgn0019650,FBgn0003117,FBgn0000448,FBgn0264490,FBgn0260753,FBgn0015919,FBgn0085432,FBgn0261573,FBgn0261963,FBgn0003118,FBgn0023091,FBgn0040318,FBgn0014343,FBgn0038197,FBgn0001319,FBgn0004795,FBgn0259234,FBgn0005630,FBgn0262139,FBgn0262975,FBgn0016694,FBgn0000413
GO:0010628	positive regulation of gene expression	biological_process	4.2802e-07	2.5033e-05	23	259	326	12231	FBgn0005630,FBgn0004795,FBgn0259234,FBgn0038197,FBgn0001319,FBgn0040318,FBgn0014343,FBgn0000413,FBgn0016694,FBgn0262975,FBgn0262139,FBgn0015919,FBgn0023091,FBgn0261573,FBgn0261963,FBgn0003118,FBgn0085432,FBgn0003117,FBgn0264490,FBgn0000448,FBgn0004859,FBgn0000210,FBgn0019650
GO:0051173	positive regulation of nitrogen compound metabolic process	biological_process	4.4333e-07	2.5774e-05	24	259	352	12231	FBgn0023091,FBgn0261963,FBgn0003118,FBgn0261573,FBgn0085432,FBgn0015919,FBgn0000413,FBgn0016694,FBgn0262975,FBgn0262139,FBgn0005630,FBgn0259234,FBgn0004795,FBgn0001319,FBgn0038197,FBgn0040318,FBgn0014343,FBgn0019650,FBgn0004859,FBgn0000210,FBgn0264490,FBgn0260753,FBgn0000448,FBgn0003117
GO:0030855	epithelial cell differentiation	biological_process	4.6695e-07	2.6986e-05	24	259	353	12231	FBgn0031903,FBgn0039704,FBgn0014343,FBgn0004635,FBgn0264272,FBgn0041092,FBgn0264442,FBgn0000413,FBgn0000182,FBgn0003392,FBgn0001075,FBgn0003382,FBgn0261963,FBgn0264695,FBgn0003118,FBgn0015600,FBgn0000497,FBgn0086898,FBgn0038826,FBgn0029881,FBgn0001624,FBgn0004859,FBgn0259685,FBgn0039709
GO:0009790	embryo development	biological_process	4.9476e-07	2.8426e-05	31	259	545	12231	FBgn0004606,FBgn0262139,FBgn0262975,FBgn0264089,FBgn0039704,FBgn0014343,FBgn0004635,FBgn0001319,FBgn0086901,FBgn0004795,FBgn0005624,FBgn0000633,FBgn0085432,FBgn0015600,FBgn0261963,FBgn0003118,FBgn0041604,FBgn0033494,FBgn0001320,FBgn0001624,FBgn0023172,FBgn0003117,FBgn0000299,FBgn0261563,FBgn0028369,FBgn0041111,FBgn0020299,FBgn0003499,FBgn0259685,FBgn0011826,FBgn0004859
GO:0006725	cellular aromatic compound metabolic process	biological_process	5.3286e-07	3.0354e-05	73	259	2007	12231	FBgn0262477,FBgn0267791,FBgn0039932,FBgn0086613,FBgn0004795,FBgn0004587,FBgn0261723,FBgn0001319,FBgn0016694,FBgn0000479,FBgn0004606,FBgn0004859,FBgn0019650,FBgn0028990,FBgn0086675,FBgn0038826,FBgn0020309,FBgn0260753,FBgn0001139,FBgn0039260,FBgn0015919,FBgn0023091,FBgn0263772,FBgn0024288,FBgn0038035,FBgn0003118,FBgn0261573,FBgn0040318,FBgn0005636,FBgn0032388,FBgn0000413,FBgn0264442,FBgn0262975,FBg…
GO:0003677	DNA binding	molecular_function	5.3454e-07	3.0354e-05	41	259	851	12231	FBgn0019650,FBgn0020307,FBgn0011481,FBgn0041111,FBgn0029824,FBgn0004859,FBgn0030738,FBgn0260397,FBgn0004914,FBgn0000448,FBgn0029157,FBgn0035849,FBgn0086613,FBgn0085432,FBgn0262477,FBgn0016694,FBgn0004606,FBgn0259234,FBgn0004795,FBgn0261723,FBgn0014343,FBgn0000179,FBgn0001319,FBgn0000210,FBgn0264490,FBgn0001320,FBgn0001138,FBgn0003117,FBgn0024288,FBgn0261963,FBgn0038035,FBgn0261573,FBgn0003118,FBg…
GO:0051239	regulation of multicellular organismal process	biological_process	5.8096e-07	3.2799e-05	32	259	578	12231	FBgn0045852,FBgn0263397,FBgn0023172,FBgn0001624,FBgn0013469,FBgn0264607,FBgn0259685,FBgn0261563,FBgn0264089,FBgn0038197,FBgn0011817,FBgn0262975,FBgn0033494,FBgn0010575,FBgn0041604,FBgn0003118,FBgn0261963,FBgn0000497,FBgn0260753,FBgn0029157,FBgn0263111,FBgn0004859,FBgn0261260,FBgn0266418,FBgn0028369,FBgn0039704,FBgn0264272,FBgn0001319,FBgn0086901,FBgn0262738,FBgn0001075,FBgn0085432
GO:0005578	proteinaceous extracellular matrix	cellular_component	9.7384e-07	5.4664e-05	10	259	65	12231	FBgn0051619,FBgn0000299,FBgn0032252,FBgn0264089,FBgn0041604,FBgn0029791,FBgn0039054,FBgn0261563,FBgn0261451,FBgn0004449
GO:0007610	behavior	biological_process	1.1093e-06	6.1912e-05	31	259	566	12231	FBgn0010575,FBgn0003175,FBgn0262738,FBgn0259099,FBgn0003392,FBgn0262477,FBgn0038975,FBgn0016926,FBgn0000479,FBgn0010470,FBgn0004795,FBgn0005630,FBgn0004635,FBgn0038197,FBgn0266098,FBgn0025631,FBgn0028990,FBgn0266418,FBgn0041111,FBgn0264815,FBgn0086675,FBgn0000114,FBgn0013469,FBgn0264607,FBgn0261570,FBgn0001624,FBgn0264693,FBgn0260753,FBgn0263111,FBgn0000108,FBgn0263397
GO:0003676	nucleic acid binding	molecular_function	1.2964e-06	7.1945e-05	61	259	1582	12231	FBgn0005624,FBgn0005630,FBgn0052423,FBgn0262636,FBgn0040318,FBgn0038197,FBgn0039920,FBgn0000559,FBgn0000413,FBgn0264442,FBgn0262139,FBgn0004878,FBgn0262975,FBgn0015919,FBgn0024288,FBgn0003118,FBgn0261963,FBgn0261573,FBgn0038035,FBgn0045852,FBgn0001138,FBgn0003117,FBgn0264490,FBgn0001320,FBgn0013469,FBgn0000557,FBgn0000210,FBgn0032194,FBgn0003499,FBgn0004795,FBgn0259234,FBgn0004587,FBgn0014343,FBg…
GO:0098609	cell-cell adhesion	biological_process	1.401e-06	7.7309e-05	12	259	101	12231	FBgn0001075,FBgn0038498,FBgn0003118,FBgn0028369,FBgn0039709,FBgn0264089,FBgn0004635,FBgn0265296,FBgn0000497,FBgn0039928,FBgn0028645,FBgn0001624
GO:0007427	epithelial cell migration, open tracheal system	biological_process	1.534e-06	8.4173e-05	8	259	40	12231	FBgn0001320,FBgn0264089,FBgn0086901,FBgn0020299,FBgn0003499,FBgn0003118,FBgn0264695,FBgn0003392
GO:0048585	negative regulation of response to stimulus	biological_process	1.848e-06	0.00010084	20	259	278	12231	FBgn0011817,FBgn0086901,FBgn0038197,FBgn0029791,FBgn0085432,FBgn0003118,FBgn0010575,FBgn0041604,FBgn0039932,FBgn0001075,FBgn0001139,FBgn0040271,FBgn0023172,FBgn0029881,FBgn0020309,FBgn0034070,FBgn0028990,FBgn0261570,FBgn0259685,FBgn0013469
GO:0065008	regulation of biological quality	biological_process	1.9001e-06	0.0001031	43	259	960	12231	FBgn0041111,FBgn0004449,FBgn0029157,FBgn0025391,FBgn0263111,FBgn0000244,FBgn0039260,FBgn0265356,FBgn0000497,FBgn0264695,FBgn0001075,FBgn0038837,FBgn0262738,FBgn0052666,FBgn0039704,FBgn0264272,FBgn0086901,FBgn0004795,FBgn0034070,FBgn0039709,FBgn0259685,FBgn0264607,FBgn0001320,FBgn0023172,FBgn0001624,FBgn0260003,FBgn0023091,FBgn0032151,FBgn0033494,FBgn0263980,FBgn0003392,FBgn0262975,FBgn0019968,FBg…
GO:0009968	negative regulation of signal transduction	biological_process	2.1187e-06	0.00011433	18	259	232	12231	FBgn0085432,FBgn0029791,FBgn0003118,FBgn0041604,FBgn0010575,FBgn0039932,FBgn0001075,FBgn0011817,FBgn0086901,FBgn0038197,FBgn0261570,FBgn0259685,FBgn0013469,FBgn0001139,FBgn0040271,FBgn0023172,FBgn0029881,FBgn0020309
GO:0007417	central nervous system development	biological_process	2.6963e-06	0.0001447	18	259	236	12231	FBgn0003499,FBgn0019650,FBgn0025631,FBgn0000210,FBgn0029157,FBgn0086758,FBgn0000448,FBgn0261963,FBgn0005677,FBgn0004878,FBgn0004606,FBgn0264442,FBgn0266098,FBgn0025936,FBgn0040318,FBgn0004635,FBgn0005630,FBgn0010407
GO:0045317	equator specification	biological_process	2.8445e-06	0.00015122	4	259	6	12231	FBgn0000497,FBgn0015919,FBgn0014343,FBgn0001075
GO:1901576	organic substance biosynthetic process	biological_process	2.8596e-06	0.00015122	69	259	1915	12231	FBgn0010575,FBgn0261963,FBgn0000559,FBgn0041092,FBgn0262139,FBgn0005624,FBgn0005630,FBgn0025639,FBgn0038197,FBgn0085390,FBgn0003499,FBgn0000557,FBgn0001320,FBgn0045852,FBgn0085432,FBgn0264001,FBgn0005677,FBgn0000182,FBgn0259234,FBgn0031903,FBgn0014343,FBgn0000179,FBgn0020307,FBgn0011481,FBgn0041111,FBgn0000114,FBgn0030738,FBgn0260397,FBgn0004914,FBgn0000448,FBgn0031530,FBgn0013531,FBgn0035849,FBg…
GO:0006139	nucleobase-containing compound metabolic process	biological_process	2.8643e-06	0.00015122	68	259	1877	12231	FBgn0024288,FBgn0263772,FBgn0023091,FBgn0261573,FBgn0003118,FBgn0038035,FBgn0015919,FBgn0264442,FBgn0000413,FBgn0032388,FBgn0262975,FBgn0004878,FBgn0005636,FBgn0040318,FBgn0000210,FBgn0004360,FBgn0032194,FBgn0264490,FBgn0001138,FBgn0003117,FBgn0039932,FBgn0086613,FBgn0267791,FBgn0262477,FBgn0000479,FBgn0016694,FBgn0004606,FBgn0004587,FBgn0004795,FBgn0001319,FBgn0261723,FBgn0019650,FBgn0086675,FBg…
GO:0043169	cation binding	molecular_function	2.8846e-06	0.00015147	55	259	1393	12231	FBgn0260003,FBgn0003117,FBgn0250819,FBgn0001138,FBgn0013995,FBgn0045852,FBgn0001320,FBgn0052369,FBgn0259685,FBgn0013469,FBgn0000210,FBgn0039709,FBgn0003499,FBgn0085390,FBgn0039920,FBgn0005636,FBgn0264089,FBgn0262636,FBgn0005630,FBgn0005624,FBgn0010470,FBgn0004878,FBgn0264442,FBgn0004885,FBgn0051619,FBgn0038975,FBgn0263772,FBgn0010575,FBgn0020309,FBgn0002569,FBgn0027844,FBgn0032252,FBgn0035849,FBg…
GO:1901360	organic cyclic compound metabolic process	biological_process	3.1815e-06	0.00016617	73	259	2075	12231	FBgn0015919,FBgn0023091,FBgn0024288,FBgn0263772,FBgn0261573,FBgn0003118,FBgn0038035,FBgn0040318,FBgn0005636,FBgn0032388,FBgn0264442,FBgn0000413,FBgn0262975,FBgn0004878,FBgn0000210,FBgn0004360,FBgn0032194,FBgn0001138,FBgn0003117,FBgn0264490,FBgn0262477,FBgn0267791,FBgn0086613,FBgn0039932,FBgn0004795,FBgn0004587,FBgn0261723,FBgn0001319,FBgn0016694,FBgn0000479,FBgn0004606,FBgn0004859,FBgn0019650,FBg…
GO:0005623	cell	cellular_component	3.2475e-06	0.00016782	155	259	5637	12231	FBgn0086901,FBgn0261723,FBgn0004587,FBgn0004795,FBgn0034145,FBgn0267791,FBgn0262477,FBgn0001075,FBgn0259170,FBgn0264695,FBgn0029881,FBgn0020309,FBgn0038826,FBgn0027844,FBgn0000108,FBgn0263111,FBgn0260753,FBgn0004859,FBgn0028369,FBgn0260964,FBgn0265991,FBgn0262975,FBgn0004878,FBgn0264442,FBgn0038975,FBgn0032388,FBgn0015919,FBgn0032717,FBgn0003118,FBgn0023091,FBgn0085376,FBgn0001138,FBgn0040259,FBg…
GO:0044464	cell part	cellular_component	3.2475e-06	0.00016782	155	259	5637	12231	FBgn0005630,FBgn0005624,FBgn0025639,FBgn0000024,FBgn0025936,FBgn0030872,FBgn0041092,FBgn0267727,FBgn0019968,FBgn0013995,FBgn0263397,FBgn0000557,FBgn0003499,FBgn0000179,FBgn0264908,FBgn0000182,FBgn0038837,FBgn0005677,FBgn0003382,FBgn0015600,FBgn0085432,FBgn0259822,FBgn0264693,FBgn0013531,FBgn0039928,FBgn0040271,FBgn0029157,FBgn0261929,FBgn0004914,FBgn0020299,FBgn0011481,FBgn0264442,FBgn0032388,FBg…
GO:0003008	system process	biological_process	3.2737e-06	0.0001682	31	259	596	12231	FBgn0034286,FBgn0264607,FBgn0260660,FBgn0028369,FBgn0051163,FBgn0041111,FBgn0029974,FBgn0003117,FBgn0263111,FBgn0000108,FBgn0025391,FBgn0265356,FBgn0033494,FBgn0262477,FBgn0259099,FBgn0003392,FBgn0053481,FBgn0052600,FBgn0262738,FBgn0264695,FBgn0261963,FBgn0030723,FBgn0041604,FBgn0266098,FBgn0004635,FBgn0005630,FBgn0032593,FBgn0040823,FBgn0000479,FBgn0033504,FBgn0038975
GO:0001655	urogenital system development	biological_process	3.3064e-06	0.0001682	10	259	74	12231	FBgn0004606,FBgn0262139,FBgn0000413,FBgn0086901,FBgn0003117,FBgn0004635,FBgn0000633,FBgn0028369,FBgn0003118,FBgn0259685
GO:0072001	renal system development	biological_process	3.3064e-06	0.0001682	10	259	74	12231	FBgn0003118,FBgn0028369,FBgn0259685,FBgn0004606,FBgn0262139,FBgn0000413,FBgn0086901,FBgn0003117,FBgn0004635,FBgn0000633
GO:0008038	neuron recognition	biological_process	3.4948e-06	0.00017686	12	259	110	12231	FBgn0033791,FBgn0005630,FBgn0264089,FBgn0264442,FBgn0004885,FBgn0028645,FBgn0040271,FBgn0004509,FBgn0038498,FBgn0261451,FBgn0004449,FBgn0262509
GO:0009058	biosynthetic process	biological_process	3.5381e-06	0.00017813	70	259	1965	12231	FBgn0004859,FBgn0019650,FBgn0038826,FBgn0020309,FBgn0260753,FBgn0001139,FBgn0262738,FBgn0259170,FBgn0262477,FBgn0034145,FBgn0086613,FBgn0039932,FBgn0004795,FBgn0261723,FBgn0001319,FBgn0016694,FBgn0004606,FBgn0000210,FBgn0004360,FBgn0001138,FBgn0003117,FBgn0264490,FBgn0032955,FBgn0015919,FBgn0023091,FBgn0263772,FBgn0024288,FBgn0003118,FBgn0038035,FBgn0261573,FBgn0040318,FBgn0005636,FBgn0000413,FBg…
GO:0044249	cellular biosynthetic process	biological_process	3.714e-06	0.00018602	68	259	1891	12231	FBgn0000559,FBgn0041092,FBgn0262139,FBgn0005624,FBgn0005630,FBgn0038197,FBgn0025639,FBgn0010575,FBgn0261963,FBgn0001320,FBgn0045852,FBgn0085390,FBgn0003499,FBgn0000557,FBgn0000182,FBgn0259234,FBgn0031903,FBgn0014343,FBgn0000179,FBgn0085432,FBgn0264001,FBgn0005677,FBgn0000448,FBgn0013531,FBgn0035849,FBgn0020307,FBgn0011481,FBgn0041111,FBgn0000114,FBgn0030738,FBgn0260397,FBgn0004914,FBgn0264442,FBg…
GO:0098794	postsynapse	cellular_component	3.7545e-06	0.00018709	7	259	32	12231	FBgn0264607,FBgn0004449,FBgn0032151,FBgn0000036,FBgn0040752,FBgn0001624,FBgn0039928
GO:0007424	open tracheal system development	biological_process	3.8027e-06	0.00018854	17	259	218	12231	FBgn0259685,FBgn0004360,FBgn0004859,FBgn0020299,FBgn0003499,FBgn0000497,FBgn0001320,FBgn0023172,FBgn0001075,FBgn0003392,FBgn0085432,FBgn0003118,FBgn0264695,FBgn0004635,FBgn0264089,FBgn0086901,FBgn0262139
GO:0046872	metal ion binding	molecular_function	3.9097e-06	0.00019286	54	259	1371	12231	FBgn0010575,FBgn0263772,FBgn0264089,FBgn0262636,FBgn0005636,FBgn0039920,FBgn0005624,FBgn0010470,FBgn0005630,FBgn0004878,FBgn0051619,FBgn0038975,FBgn0264442,FBgn0004885,FBgn0259685,FBgn0000210,FBgn0013469,FBgn0085390,FBgn0003499,FBgn0039709,FBgn0260003,FBgn0003117,FBgn0013995,FBgn0045852,FBgn0001138,FBgn0250819,FBgn0001320,FBgn0052369,FBgn0263974,FBgn0001075,FBgn0262738,FBgn0259170,FBgn0050147,FBg…
GO:0001077	transcriptional activator activity, RNA polymerase II core promoter proximal region sequence-specific binding	molecular_function	3.9533e-06	0.00019403	8	259	45	12231	FBgn0038197,FBgn0259234,FBgn0262139,FBgn0000413,FBgn0016694,FBgn0004859,FBgn0003118,FBgn0085432
GO:0007435	salivary gland morphogenesis	biological_process	4.2239e-06	0.0002044	10	259	76	12231	FBgn0262139,FBgn0004635,FBgn0004795,FBgn0033791,FBgn0031903,FBgn0000633,FBgn0085432,FBgn0259685,FBgn0000210,FBgn0003392
GO:0022612	gland morphogenesis	biological_process	4.2239e-06	0.0002044	10	259	76	12231	FBgn0262139,FBgn0004635,FBgn0004795,FBgn0033791,FBgn0031903,FBgn0000633,FBgn0085432,FBgn0259685,FBgn0000210,FBgn0003392
GO:0008037	cell recognition	biological_process	4.2274e-06	0.0002044	12	259	112	12231	FBgn0040271,FBgn0028645,FBgn0264442,FBgn0004885,FBgn0264089,FBgn0033791,FBgn0005630,FBgn0262509,FBgn0004449,FBgn0261451,FBgn0004509,FBgn0038498
GO:0045165	cell fate commitment	biological_process	4.43e-06	0.00021314	27	259	486	12231	FBgn0013469,FBgn0261451,FBgn0000210,FBgn0051612,FBgn0001624,FBgn0001320,FBgn0001139,FBgn0045852,FBgn0003117,FBgn0020309,FBgn0085432,FBgn0261963,FBgn0003118,FBgn0263980,FBgn0005677,FBgn0015919,FBgn0267791,FBgn0000479,FBgn0000413,FBgn0262139,FBgn0004878,FBgn0000633,FBgn0005630,FBgn0264089,FBgn0261723,FBgn0004635,FBgn0001319
GO:0023057	negative regulation of signaling	biological_process	4.5871e-06	0.00021962	18	259	245	12231	FBgn0011817,FBgn0086901,FBgn0038197,FBgn0010575,FBgn0041604,FBgn0039932,FBgn0085432,FBgn0029791,FBgn0003118,FBgn0001075,FBgn0023172,FBgn0040271,FBgn0001139,FBgn0029881,FBgn0020309,FBgn0013469,FBgn0261570,FBgn0259685
GO:0042802	identical protein binding	molecular_function	4.6486e-06	0.00022148	12	259	113	12231	FBgn0000024,FBgn0014343,FBgn0265296,FBgn0259234,FBgn0019968,FBgn0016694,FBgn0263219,FBgn0000413,FBgn0004449,FBgn0004859,FBgn0264001,FBgn0264695
GO:0001228	transcriptional activator activity, RNA polymerase II transcription regulatory region sequence-specific binding	molecular_function	4.6988e-06	0.00022278	8	259	46	12231	FBgn0259234,FBgn0038197,FBgn0016694,FBgn0000413,FBgn0262139,FBgn0004859,FBgn0085432,FBgn0003118
GO:0098742	cell-cell adhesion via plasma-membrane adhesion molecules	biological_process	4.9077e-06	0.00023156	9	259	61	12231	FBgn0265296,FBgn0000497,FBgn0039928,FBgn0028645,FBgn0001075,FBgn0038498,FBgn0003118,FBgn0028369,FBgn0039709
GO:0042067	establishment of ommatidial planar polarity	biological_process	5.6309e-06	0.00026441	9	259	62	12231	FBgn0011817,FBgn0086898,FBgn0014343,FBgn0005630,FBgn0031903,FBgn0000497,FBgn0003118,FBgn0015919,FBgn0001075
GO:0010648	negative regulation of cell communication	biological_process	5.7528e-06	0.00026884	18	259	249	12231	FBgn0011817,FBgn0086901,FBgn0038197,FBgn0010575,FBgn0041604,FBgn0039932,FBgn0085432,FBgn0029791,FBgn0003118,FBgn0001075,FBgn0023172,FBgn0040271,FBgn0001139,FBgn0029881,FBgn0020309,FBgn0013469,FBgn0261570,FBgn0259685
GO:0060541	respiratory system development	biological_process	6.1765e-06	0.00028727	17	259	226	12231	FBgn0004360,FBgn0004859,FBgn0259685,FBgn0020299,FBgn0003499,FBgn0000497,FBgn0023172,FBgn0001320,FBgn0003392,FBgn0001075,FBgn0085432,FBgn0003118,FBgn0264695,FBgn0004635,FBgn0264089,FBgn0086901,FBgn0262139
GO:0016020	membrane	cellular_component	6.8343e-06	0.00031636	81	259	2432	12231	FBgn0263219,FBgn0259145,FBgn0266098,FBgn0086901,FBgn0041723,FBgn0085408,FBgn0001075,FBgn0034247,FBgn0034145,FBgn0262738,FBgn0034911,FBgn0259170,FBgn0004509,FBgn0038880,FBgn0025391,FBgn0263111,FBgn0000108,FBgn0260753,FBgn0028369,FBgn0260964,FBgn0261260,FBgn0036732,FBgn0004859,FBgn0038975,FBgn0004635,FBgn0004842,FBgn0010470,FBgn0032593,FBgn0038652,FBgn0262509,FBgn0041604,FBgn0082585,FBgn0003392,FBg…
GO:0000982	transcription factor activity, RNA polymerase II core promoter proximal region sequence-specific binding	molecular_function	7.3506e-06	0.00033865	9	259	64	12231	FBgn0085432,FBgn0003118,FBgn0004859,FBgn0016694,FBgn0000413,FBgn0262139,FBgn0001320,FBgn0259234,FBgn0038197
GO:0005509	calcium ion binding	molecular_function	8.7515e-06	0.0004013	16	259	208	12231	FBgn0039054,FBgn0001075,FBgn0262738,FBgn0259170,FBgn0004885,FBgn0264089,FBgn0010470,FBgn0261260,FBgn0039709,FBgn0085390,FBgn0259685,FBgn0039928,FBgn0263111,FBgn0260003,FBgn0000497,FBgn0013995
GO:0048813	dendrite morphogenesis	biological_process	9.9115e-06	0.00045236	16	259	210	12231	FBgn0000210,FBgn0004859,FBgn0001139,FBgn0001320,FBgn0086758,FBgn0045852,FBgn0262139,FBgn0262975,FBgn0264442,FBgn0264089,FBgn0038197,FBgn0086901,FBgn0005636,FBgn0001319,FBgn0004795,FBgn0005630
GO:0007517	muscle organ development	biological_process	1.0442e-05	0.00047434	13	259	143	12231	FBgn0003499,FBgn0264695,FBgn0028369,FBgn0004360,FBgn0033504,FBgn0264693,FBgn0264442,FBgn0001320,FBgn0004606,FBgn0004795,FBgn0260003,FBgn0005636,FBgn0001319
GO:0007507	heart development	biological_process	1.1001e-05	0.000493	11	259	103	12231	FBgn0004606,FBgn0264089,FBgn0003117,FBgn0032252,FBgn0000633,FBgn0261963,FBgn0003118,FBgn0085432,FBgn0082585,FBgn0020299,FBgn0004859
GO:0001736	establishment of planar polarity	biological_process	1.1004e-05	0.000493	11	259	103	12231	FBgn0011817,FBgn0031903,FBgn0005630,FBgn0000497,FBgn0014343,FBgn0086898,FBgn0264272,FBgn0085408,FBgn0003118,FBgn0001075,FBgn0015919
GO:0007164	establishment of tissue polarity	biological_process	1.1004e-05	0.000493	11	259	103	12231	FBgn0001075,FBgn0015919,FBgn0085408,FBgn0003118,FBgn0031903,FBgn0005630,FBgn0000497,FBgn0014343,FBgn0086898,FBgn0264272,FBgn0011817
GO:0003006	developmental process involved in reproduction	biological_process	1.1748e-05	0.00052395	36	259	795	12231	FBgn0038826,FBgn0029881,FBgn0001139,FBgn0260397,FBgn0000114,FBgn0004859,FBgn0020307,FBgn0020299,FBgn0014343,FBgn0004795,FBgn0031903,FBgn0004606,FBgn0000182,FBgn0000479,FBgn0005677,FBgn0264695,FBgn0015600,FBgn0000299,FBgn0023172,FBgn0001624,FBgn0259685,FBgn0000210,FBgn0261563,FBgn0039709,FBgn0004635,FBgn0264089,FBgn0005630,FBgn0262975,FBgn0267727,FBgn0041092,FBgn0264442,FBgn0000413,FBgn0003392,FBg…
GO:0016358	dendrite development	biological_process	1.2571e-05	0.0005581	16	259	214	12231	FBgn0086901,FBgn0038197,FBgn0005636,FBgn0001319,FBgn0264089,FBgn0005630,FBgn0004795,FBgn0262975,FBgn0262139,FBgn0264442,FBgn0004859,FBgn0000210,FBgn0045852,FBgn0001320,FBgn0001139,FBgn0086758
GO:0045211	postsynaptic membrane	cellular_component	1.3679e-05	0.00060454	6	259	26	12231	FBgn0032151,FBgn0004449,FBgn0264607,FBgn0039928,FBgn0000036,FBgn0001624
GO:0016319	mushroom body development	biological_process	1.3859e-05	0.00060975	9	259	69	12231	FBgn0266098,FBgn0025936,FBgn0264442,FBgn0086758,FBgn0000448,FBgn0004878,FBgn0029157,FBgn0005677,FBgn0019650
GO:0072358	cardiovascular system development	biological_process	1.4501e-05	0.0006302	11	259	106	12231	FBgn0020299,FBgn0082585,FBgn0085432,FBgn0261963,FBgn0003118,FBgn0004859,FBgn0004606,FBgn0032252,FBgn0000633,FBgn0264089,FBgn0003117
GO:0072359	circulatory system development	biological_process	1.4501e-05	0.0006302	11	259	106	12231	FBgn0085432,FBgn0261963,FBgn0003118,FBgn0020299,FBgn0082585,FBgn0004859,FBgn0004606,FBgn0264089,FBgn0003117,FBgn0032252,FBgn0000633
GO:0042692	muscle cell differentiation	biological_process	1.4518e-05	0.0006302	11	259	106	12231	FBgn0265991,FBgn0264695,FBgn0028369,FBgn0003118,FBgn0000210,FBgn0015919,FBgn0265356,FBgn0264693,FBgn0025391,FBgn0001319,FBgn0038197
GO:0007431	salivary gland development	biological_process	1.5862e-05	0.00068248	11	259	107	12231	FBgn0262139,FBgn0004795,FBgn0031903,FBgn0033791,FBgn0000633,FBgn0004635,FBgn0264089,FBgn0085432,FBgn0000210,FBgn0003392,FBgn0259685
GO:0035272	exocrine system development	biological_process	1.5862e-05	0.00068248	11	259	107	12231	FBgn0085432,FBgn0003392,FBgn0000210,FBgn0259685,FBgn0262139,FBgn0033791,FBgn0031903,FBgn0000633,FBgn0004795,FBgn0264089,FBgn0004635
GO:0046483	heterocycle metabolic process	biological_process	1.6479e-05	0.00070594	68	259	1970	12231	FBgn0004360,FBgn0000210,FBgn0032194,FBgn0264490,FBgn0001138,FBgn0003117,FBgn0263772,FBgn0024288,FBgn0023091,FBgn0003118,FBgn0038035,FBgn0261573,FBgn0015919,FBgn0000413,FBgn0264442,FBgn0032388,FBgn0262975,FBgn0004878,FBgn0005636,FBgn0040318,FBgn0019650,FBgn0086675,FBgn0004859,FBgn0260753,FBgn0039260,FBgn0001139,FBgn0020309,FBgn0038826,FBgn0039932,FBgn0086613,FBgn0267791,FBgn0262477,FBgn0000479,FBg…
GO:0009629	response to gravity	biological_process	1.7232e-05	0.00073178	6	259	27	12231	FBgn0000210,FBgn0052423,FBgn0267727,FBgn0011817,FBgn0001624,FBgn0260753
GO:0042332	gravitaxis	biological_process	1.7232e-05	0.00073178	6	259	27	12231	FBgn0000210,FBgn0052423,FBgn0001624,FBgn0260753,FBgn0267727,FBgn0011817
GO:0060089	molecular transducer activity	molecular_function	1.7752e-05	0.0007506	28	259	555	12231	FBgn0038880,FBgn0260753,FBgn0052082,FBgn0052843,FBgn0000448,FBgn0033791,FBgn0000497,FBgn0035849,FBgn0033915,FBgn0262869,FBgn0030707,FBgn0261260,FBgn0000036,FBgn0025631,FBgn0004914,FBgn0261929,FBgn0264707,FBgn0262139,FBgn0004885,FBgn0011817,FBgn0083975,FBgn0041092,FBgn0004842,FBgn0053531,FBgn0025936,FBgn0010407,FBgn0038837,FBgn0001075
GO:0005634	nucleus	cellular_component	1.855e-05	0.00078095	68	259	1977	12231	FBgn0015600,FBgn0085432,FBgn0003175,FBgn0005677,FBgn0000179,FBgn0014343,FBgn0259234,FBgn0011481,FBgn0041111,FBgn0020307,FBgn0004914,FBgn0260397,FBgn0030738,FBgn0000114,FBgn0013531,FBgn0000448,FBgn0035849,FBgn0261963,FBgn0010575,FBgn0262139,FBgn0041092,FBgn0267727,FBgn0025639,FBgn0039920,FBgn0038197,FBgn0005630,FBgn0005624,FBgn0003499,FBgn0013469,FBgn0001320,FBgn0045852,FBgn0086613,FBgn0039932,FBg…
GO:0043167	ion binding	molecular_function	1.8693e-05	0.00078359	77	259	2332	12231	FBgn0039920,FBgn0261090,FBgn0025936,FBgn0262636,FBgn0005630,FBgn0005624,FBgn0019968,FBgn0030558,FBgn0004885,FBgn0051619,FBgn0000559,FBgn0010575,FBgn0250819,FBgn0013995,FBgn0045852,FBgn0001320,FBgn0052082,FBgn0052369,FBgn0013469,FBgn0000557,FBgn0039709,FBgn0003499,FBgn0085390,FBgn0053531,FBgn0010407,FBgn0050147,FBgn0015032,FBgn0029791,FBgn0000497,FBgn0035849,FBgn0033791,FBgn0039928,FBgn0000448,FBg…
GO:0016055	Wnt signaling pathway	biological_process	2.0605e-05	0.00086004	11	259	110	12231	FBgn0011817,FBgn0001139,FBgn0040271,FBgn0033791,FBgn0031903,FBgn0264272,FBgn0020309,FBgn0041604,FBgn0085432,FBgn0004360,FBgn0001075
GO:0030010	establishment of cell polarity	biological_process	2.1314e-05	0.00088585	7	259	41	12231	FBgn0000497,FBgn0264272,FBgn0259685,FBgn0001075,FBgn0260003,FBgn0001624,FBgn0019968
GO:0007157	heterophilic cell-cell adhesion via plasma membrane cell adhesion molecules	biological_process	2.154e-05	0.00089144	6	259	28	12231	FBgn0028645,FBgn0028369,FBgn0003118,FBgn0000497,FBgn0038498,FBgn0001075
GO:0060322	head development	biological_process	2.1735e-05	0.00089571	13	259	153	12231	FBgn0019650,FBgn0005677,FBgn0029157,FBgn0004878,FBgn0262975,FBgn0000448,FBgn0086758,FBgn0264442,FBgn0025936,FBgn0004635,FBgn0266098,FBgn0001319,FBgn0005630
GO:0048863	stem cell differentiation	biological_process	2.4599e-05	0.0010095	9	259	74	12231	FBgn0000114,FBgn0013469,FBgn0261963,FBgn0003118,FBgn0004635,FBgn0003117,FBgn0045852,FBgn0000633,FBgn0004878
GO:0045202	synapse	cellular_component	2.5575e-05	0.0010452	15	259	202	12231	FBgn0001624,FBgn0038975,FBgn0083975,FBgn0039928,FBgn0263111,FBgn0261090,FBgn0000024,FBgn0041604,FBgn0260964,FBgn0000036,FBgn0040752,FBgn0264607,FBgn0003392,FBgn0004449,FBgn0032151
GO:0031325	positive regulation of cellular metabolic process	biological_process	2.7352e-05	0.0011131	26	259	507	12231	FBgn0000448,FBgn0264490,FBgn0260753,FBgn0003117,FBgn0019650,FBgn0000210,FBgn0004859,FBgn0259685,FBgn0032388,FBgn0016694,FBgn0000413,FBgn0262139,FBgn0262975,FBgn0259234,FBgn0004795,FBgn0005630,FBgn0014343,FBgn0040318,FBgn0001319,FBgn0038197,FBgn0023091,FBgn0085432,FBgn0003118,FBgn0261963,FBgn0261573,FBgn0015919
GO:0008045	motor neuron axon guidance	biological_process	2.7724e-05	0.0011236	8	259	58	12231	FBgn0261451,FBgn0260660,FBgn0004449,FBgn0033791,FBgn0001138,FBgn0004885,FBgn0004606,FBgn0040271
GO:0030178	negative regulation of Wnt signaling pathway	biological_process	3.2857e-05	0.0013261	6	259	30	12231	FBgn0011817,FBgn0041604,FBgn0001139,FBgn0085432,FBgn0001075,FBgn0020309
GO:0031224	intrinsic component of membrane	cellular_component	3.4409e-05	0.001383	50	259	1329	12231	FBgn0000182,FBgn0259145,FBgn0263219,FBgn0028645,FBgn0083975,FBgn0266098,FBgn0265296,FBgn0039704,FBgn0264908,FBgn0053531,FBgn0026189,FBgn0041723,FBgn0010407,FBgn0001075,FBgn0034247,FBgn0004509,FBgn0034911,FBgn0263111,FBgn0039928,FBgn0025391,FBgn0038880,FBgn0260753,FBgn0259822,FBgn0000497,FBgn0037387,FBgn0262869,FBgn0260964,FBgn0259111,FBgn0004449,FBgn0261929,FBgn0038975,FBgn0004842,FBgn0261090,FBg…
GO:0007415	defasciculation of motor neuron axon	biological_process	3.7029e-05	0.0014822	4	259	10	12231	FBgn0038498,FBgn0261451,FBgn0004885,FBgn0028645
GO:0007267	cell-cell signaling	biological_process	4.0011e-05	0.001595	25	259	488	12231	FBgn0038837,FBgn0032151,FBgn0003392,FBgn0263980,FBgn0023091,FBgn0001319,FBgn0261090,FBgn0086901,FBgn0264089,FBgn0000024,FBgn0262139,FBgn0000479,FBgn0038975,FBgn0083975,FBgn0051612,FBgn0264607,FBgn0003499,FBgn0000036,FBgn0020309,FBgn0260003,FBgn0263111,FBgn0039260,FBgn0039928,FBgn0001139,FBgn0001624
GO:0022414	reproductive process	biological_process	4.5026e-05	0.0017877	41	259	1019	12231	FBgn0259685,FBgn0264607,FBgn0000210,FBgn0264815,FBgn0261563,FBgn0039709,FBgn0000299,FBgn0001624,FBgn0023172,FBgn0003392,FBgn0003118,FBgn0261963,FBgn0024288,FBgn0004635,FBgn0264089,FBgn0005630,FBgn0262975,FBgn0264442,FBgn0000413,FBgn0041092,FBgn0267727,FBgn0260397,FBgn0004859,FBgn0000114,FBgn0086675,FBgn0020307,FBgn0020299,FBgn0029881,FBgn0038826,FBgn0263111,FBgn0001139,FBgn0005677,FBgn0262477,FBg…
GO:0016021	integral component of membrane	cellular_component	4.9587e-05	0.0019608	49	259	1311	12231	FBgn0032536,FBgn0032151,FBgn0033494,FBgn0038975,FBgn0032593,FBgn0028704,FBgn0004635,FBgn0025936,FBgn0261090,FBgn0004842,FBgn0025631,FBgn0000036,FBgn0037766,FBgn0039709,FBgn0030707,FBgn0038498,FBgn0259685,FBgn0052843,FBgn0034067,FBgn0013995,FBgn0034911,FBgn0004509,FBgn0001075,FBgn0034247,FBgn0083975,FBgn0028645,FBgn0263219,FBgn0259145,FBgn0000182,FBgn0041723,FBgn0010407,FBgn0026189,FBgn0264908,FBg…
GO:0055001	muscle cell development	biological_process	5.3432e-05	0.0020959	7	259	47	12231	FBgn0264693,FBgn0265356,FBgn0265991,FBgn0264695,FBgn0025391,FBgn0003118,FBgn0000210
GO:0055002	striated muscle cell development	biological_process	5.3432e-05	0.0020959	7	259	47	12231	FBgn0264695,FBgn0025391,FBgn0003118,FBgn0265356,FBgn0265991,FBgn0264693,FBgn0000210
GO:0044708	single-organism behavior	biological_process	5.5523e-05	0.0021692	22	259	408	12231	FBgn0263397,FBgn0260753,FBgn0001624,FBgn0000108,FBgn0263111,FBgn0013469,FBgn0264607,FBgn0025631,FBgn0028990,FBgn0266418,FBgn0041111,FBgn0004635,FBgn0038197,FBgn0266098,FBgn0038975,FBgn0000479,FBgn0016926,FBgn0262738,FBgn0259099,FBgn0003392,FBgn0262477,FBgn0010575
GO:0048747	muscle fiber development	biological_process	5.7542e-05	0.0022391	4	259	11	12231	FBgn0000210,FBgn0265356,FBgn0264693,FBgn0003118
GO:0007156	homophilic cell adhesion via plasma membrane adhesion molecules	biological_process	5.8115e-05	0.0022524	6	259	33	12231	FBgn0001075,FBgn0265296,FBgn0000497,FBgn0028369,FBgn0039928,FBgn0039709
GO:0007268	synaptic transmission	biological_process	5.9768e-05	0.0023073	16	259	243	12231	FBgn0264607,FBgn0000036,FBgn0260003,FBgn0039260,FBgn0263111,FBgn0039928,FBgn0001624,FBgn0038837,FBgn0032151,FBgn0003392,FBgn0086901,FBgn0261090,FBgn0000024,FBgn0000479,FBgn0083975,FBgn0038975
GO:0007447	imaginal disc pattern formation	biological_process	6.3383e-05	0.0024373	10	259	103	12231	FBgn0004635,FBgn0000179,FBgn0000497,FBgn0261963,FBgn0041111,FBgn0003118,FBgn0010575,FBgn0041604,FBgn0005677,FBgn0004859
GO:0030029	actin filament-based process	biological_process	6.9123e-05	0.0026475	16	259	246	12231	FBgn0001139,FBgn0029157,FBgn0025391,FBgn0265356,FBgn0023172,FBgn0052082,FBgn0041111,FBgn0025631,FBgn0265991,FBgn0000182,FBgn0039704,FBgn0264272,FBgn0086901,FBgn0085408,FBgn0264695,FBgn0003392
GO:0008544	epidermis development	biological_process	7.1339e-05	0.0027218	8	259	66	12231	FBgn0086898,FBgn0264272,FBgn0031903,FBgn0000497,FBgn0001320,FBgn0001075,FBgn0004859,FBgn0003382
GO:0010604	positive regulation of macromolecule metabolic process	biological_process	7.605e-05	0.0028902	24	259	477	12231	FBgn0004859,FBgn0000210,FBgn0019650,FBgn0003117,FBgn0264490,FBgn0000448,FBgn0015919,FBgn0261963,FBgn0003118,FBgn0261573,FBgn0085432,FBgn0023091,FBgn0038197,FBgn0001319,FBgn0014343,FBgn0040318,FBgn0005630,FBgn0259234,FBgn0004795,FBgn0262975,FBgn0262139,FBgn0000413,FBgn0032388,FBgn0016694
GO:0035277	spiracle morphogenesis, open tracheal system	biological_process	8.0094e-05	0.0030321	5	259	22	12231	FBgn0085432,FBgn0262139,FBgn0023172,FBgn0086901,FBgn0004859
GO:0060249	anatomical structure homeostasis	biological_process	8.0442e-05	0.003033	10	259	106	12231	FBgn0034070,FBgn0032151,FBgn0259685,FBgn0262738,FBgn0265356,FBgn0041092,FBgn0260003,FBgn0004635,FBgn0086901,FBgn0010470
GO:0048565	digestive tract development	biological_process	8.1051e-05	0.003033	10	259	106	12231	FBgn0259685,FBgn0020307,FBgn0261563,FBgn0003118,FBgn0004635,FBgn0264089,FBgn0086901,FBgn0000633,FBgn0262139,FBgn0262975
GO:0055123	digestive system development	biological_process	8.1051e-05	0.003033	10	259	106	12231	FBgn0086901,FBgn0004635,FBgn0264089,FBgn0000633,FBgn0262975,FBgn0262139,FBgn0259685,FBgn0261563,FBgn0003118,FBgn0020307
GO:0043170	macromolecule metabolic process	biological_process	8.2933e-05	0.0030916	108	259	3743	12231	FBgn0000182,FBgn0259234,FBgn0031903,FBgn0010407,FBgn0053531,FBgn0014343,FBgn0000179,FBgn0029791,FBgn0085432,FBgn0264001,FBgn0005677,FBgn0000448,FBgn0029157,FBgn0013531,FBgn0035849,FBgn0000497,FBgn0033791,FBgn0034903,FBgn0020307,FBgn0011481,FBgn0041111,FBgn0000114,FBgn0030738,FBgn0260397,FBgn0004914,FBgn0051619,FBgn0000559,FBgn0041092,FBgn0004885,FBgn0262139,FBgn0005624,FBgn0005630,FBgn0025936,FBg…
GO:0040034	regulation of development, heterochronic	biological_process	8.4818e-05	0.0031279	4	259	12	12231	FBgn0000210,FBgn0086613,FBgn0000448,FBgn0004878
GO:0061318	renal filtration cell differentiation	biological_process	8.4866e-05	0.0031279	4	259	12	12231	FBgn0028369,FBgn0003118,FBgn0004606,FBgn0003117
GO:0061319	nephrocyte differentiation	biological_process	8.4866e-05	0.0031279	4	259	12	12231	FBgn0003117,FBgn0004606,FBgn0028369,FBgn0003118
GO:0009893	positive regulation of metabolic process	biological_process	8.8708e-05	0.0032475	26	259	544	12231	FBgn0040318,FBgn0014343,FBgn0001319,FBgn0038197,FBgn0259234,FBgn0004795,FBgn0005630,FBgn0262139,FBgn0262975,FBgn0016694,FBgn0032388,FBgn0000413,FBgn0015919,FBgn0085432,FBgn0003118,FBgn0261963,FBgn0261573,FBgn0023091,FBgn0003117,FBgn0000448,FBgn0260753,FBgn0264490,FBgn0259685,FBgn0000210,FBgn0004859,FBgn0019650
GO:0034702	ion channel complex	cellular_component	8.904e-05	0.0032475	8	259	68	12231	FBgn0033494,FBgn0032151,FBgn0000036,FBgn0264908,FBgn0259822,FBgn0032593,FBgn0263111,FBgn0259145
GO:0004871	signal transducer activity	molecular_function	8.9108e-05	0.0032475	24	259	482	12231	FBgn0038837,FBgn0053531,FBgn0025936,FBgn0004842,FBgn0010407,FBgn0262139,FBgn0264707,FBgn0041092,FBgn0011817,FBgn0004914,FBgn0261929,FBgn0262869,FBgn0033915,FBgn0000036,FBgn0025631,FBgn0030707,FBgn0000497,FBgn0033791,FBgn0035849,FBgn0038880,FBgn0000448,FBgn0052843,FBgn0052082,FBgn0260753
GO:0007420	brain development	biological_process	9.0566e-05	0.0032883	11	259	129	12231	FBgn0005677,FBgn0019650,FBgn0005630,FBgn0025936,FBgn0004635,FBgn0266098,FBgn0000448,FBgn0264442,FBgn0086758,FBgn0029157,FBgn0004878
GO:0001700	embryonic development via the syncytial blastoderm	biological_process	9.3613e-05	0.0033864	13	259	176	12231	FBgn0000299,FBgn0000633,FBgn0014343,FBgn0003117,FBgn0001319,FBgn0086901,FBgn0023172,FBgn0001624,FBgn0004606,FBgn0033494,FBgn0259685,FBgn0003499,FBgn0028369
GO:0097060	synaptic membrane	cellular_component	9.691e-05	0.0034927	6	259	36	12231	FBgn0264607,FBgn0032151,FBgn0004449,FBgn0000036,FBgn0001624,FBgn0039928
GO:0045595	regulation of cell differentiation	biological_process	0.0001008	0.0036197	16	259	254	12231	FBgn0085432,FBgn0003118,FBgn0261963,FBgn0262738,FBgn0262975,FBgn0001319,FBgn0264272,FBgn0086901,FBgn0028369,FBgn0000114,FBgn0013469,FBgn0004859,FBgn0029157,FBgn0023172,FBgn0001624,FBgn0045852
GO:0007474	imaginal disc-derived wing vein specification	biological_process	0.00010387	0.0037161	7	259	52	12231	FBgn0039932,FBgn0011817,FBgn0015919,FBgn0001319,FBgn0260397,FBgn0260003,FBgn0004635
GO:0048608	reproductive structure development	biological_process	0.00010711	0.0038042	9	259	89	12231	FBgn0000210,FBgn0020307,FBgn0261563,FBgn0024288,FBgn0264089,FBgn0031903,FBgn0000299,FBgn0005630,FBgn0004606
GO:0061458	reproductive system development	biological_process	0.00010711	0.0038042	9	259	89	12231	FBgn0000210,FBgn0024288,FBgn0261563,FBgn0020307,FBgn0005630,FBgn0031903,FBgn0000299,FBgn0264089,FBgn0004606
GO:0008134	transcription factor binding	molecular_function	0.00011855	0.0041824	11	259	133	12231	FBgn0267791,FBgn0085432,FBgn0003118,FBgn0261963,FBgn0040318,FBgn0003117,FBgn0038197,FBgn0004795,FBgn0001139,FBgn0001320,FBgn0000413
GO:0030036	actin cytoskeleton organization	biological_process	0.00011862	0.0041824	15	259	231	12231	FBgn0086901,FBgn0264272,FBgn0029157,FBgn0001139,FBgn0000182,FBgn0025391,FBgn0265356,FBgn0023172,FBgn0052082,FBgn0003392,FBgn0085408,FBgn0041111,FBgn0264695,FBgn0025631,FBgn0265991
GO:0023056	positive regulation of signaling	biological_process	0.0001263	0.0044372	16	259	259	12231	FBgn0261573,FBgn0041604,FBgn0023091,FBgn0262562,FBgn0003392,FBgn0032388,FBgn0038975,FBgn0001319,FBgn0263706,FBgn0038197,FBgn0004635,FBgn0260660,FBgn0261451,FBgn0040271,FBgn0023172,FBgn0043070
GO:0051146	striated muscle cell differentiation	biological_process	0.00012784	0.0044754	9	259	91	12231	FBgn0000210,FBgn0028369,FBgn0003118,FBgn0264695,FBgn0265991,FBgn0038197,FBgn0025391,FBgn0265356,FBgn0264693
GO:0048859	formation of anatomical boundary	biological_process	0.00014939	0.0051956	7	259	55	12231	FBgn0000497,FBgn0013469,FBgn0015919,FBgn0014343,FBgn0264089,FBgn0004635,FBgn0001075
GO:0007224	smoothened signaling pathway	biological_process	0.00014949	0.0051956	7	259	55	12231	FBgn0040271,FBgn0001139,FBgn0039709,FBgn0041604,FBgn0010575,FBgn0014343,FBgn0004859
GO:0034641	cellular nitrogen compound metabolic process	biological_process	0.00015001	0.0051956	73	259	2311	12231	FBgn0015919,FBgn0263772,FBgn0024288,FBgn0023091,FBgn0261573,FBgn0003118,FBgn0038035,FBgn0005636,FBgn0040318,FBgn0000413,FBgn0264442,FBgn0032388,FBgn0262975,FBgn0004878,FBgn0004360,FBgn0000210,FBgn0032194,FBgn0001138,FBgn0003117,FBgn0264490,FBgn0267791,FBgn0262477,FBgn0086613,FBgn0039932,FBgn0004587,FBgn0004795,FBgn0001319,FBgn0261723,FBgn0000479,FBgn0016694,FBgn0004606,FBgn0004859,FBgn0019650,FBg…
GO:0009792	embryo development ending in birth or egg hatching	biological_process	0.00016328	0.005635	13	259	186	12231	FBgn0259685,FBgn0033494,FBgn0028369,FBgn0003499,FBgn0003117,FBgn0014343,FBgn0086901,FBgn0001319,FBgn0000633,FBgn0000299,FBgn0004606,FBgn0023172,FBgn0001624
GO:0007414	axonal defasciculation	biological_process	0.00016535	0.0056867	4	259	14	12231	FBgn0004885,FBgn0028645,FBgn0038498,FBgn0261451
GO:0051128	regulation of cellular component organization	biological_process	0.00017079	0.005853	27	259	599	12231	FBgn0045852,FBgn0032252,FBgn0020309,FBgn0052082,FBgn0001624,FBgn0023172,FBgn0001320,FBgn0029157,FBgn0263111,FBgn0000114,FBgn0264607,FBgn0004449,FBgn0261260,FBgn0039709,FBgn0028369,FBgn0041111,FBgn0039704,FBgn0264272,FBgn0001319,FBgn0086901,FBgn0038197,FBgn0011817,FBgn0038975,FBgn0262975,FBgn0003392,FBgn0052666,FBgn0261573
GO:0006811	ion transport	biological_process	0.00017435	0.0059542	21	259	411	12231	FBgn0263111,FBgn0051634,FBgn0013995,FBgn0263397,FBgn0259822,FBgn0030707,FBgn0037766,FBgn0000036,FBgn0260964,FBgn0020307,FBgn0036732,FBgn0259111,FBgn0259145,FBgn0030872,FBgn0028704,FBgn0032593,FBgn0264908,FBgn0034911,FBgn0038837,FBgn0033494,FBgn0032151
GO:0010647	positive regulation of cell communication	biological_process	0.00017933	0.0061029	16	259	267	12231	FBgn0040271,FBgn0023172,FBgn0043070,FBgn0260660,FBgn0261451,FBgn0038975,FBgn0032388,FBgn0263706,FBgn0001319,FBgn0038197,FBgn0004635,FBgn0261573,FBgn0041604,FBgn0023091,FBgn0262562,FBgn0003392
GO:0007292	female gamete generation	biological_process	0.0001804	0.0061068	27	259	601	12231	FBgn0001624,FBgn0029881,FBgn0038826,FBgn0039709,FBgn0020299,FBgn0259685,FBgn0260397,FBgn0004859,FBgn0264607,FBgn0000210,FBgn0000114,FBgn0262975,FBgn0000182,FBgn0264442,FBgn0000479,FBgn0000413,FBgn0041092,FBgn0267727,FBgn0004635,FBgn0014343,FBgn0005630,FBgn0004795,FBgn0264695,FBgn0003118,FBgn0261963,FBgn0015600,FBgn0003392
GO:0051705	multi-organism behavior	biological_process	0.0001807	0.0061068	13	259	188	12231	FBgn0264607,FBgn0000114,FBgn0261570,FBgn0262477,FBgn0264815,FBgn0086675,FBgn0003175,FBgn0005630,FBgn0010470,FBgn0004795,FBgn0000479,FBgn0001624,FBgn0263111
GO:0006807	nitrogen compound metabolic process	biological_process	0.00020019	0.0067423	79	259	2579	12231	FBgn0051439,FBgn0000557,FBgn0003499,FBgn0264815,FBgn0045852,FBgn0001320,FBgn0010575,FBgn0261963,FBgn0005630,FBgn0005624,FBgn0085249,FBgn0039920,FBgn0025639,FBgn0038197,FBgn0000024,FBgn0041092,FBgn0000559,FBgn0030558,FBgn0262139,FBgn0030738,FBgn0000114,FBgn0004914,FBgn0260397,FBgn0011481,FBgn0041111,FBgn0020307,FBgn0035849,FBgn0000448,FBgn0013531,FBgn0005677,FBgn0264001,FBgn0085432,FBgn0031903,FBg…
GO:0042684	cardioblast cell fate commitment	biological_process	0.00022183	0.0074453	4	259	15	12231	FBgn0003117,FBgn0000633,FBgn0261963,FBgn0003118
GO:0044331	cell-cell adhesion mediated by cadherin	biological_process	0.00022262	0.0074465	4	259	15	12231	FBgn0000497,FBgn0001075,FBgn0039709,FBgn0039928
GO:0048589	developmental growth	biological_process	0.00023845	0.0079486	17	259	302	12231	FBgn0264607,FBgn0004360,FBgn0259685,FBgn0004449,FBgn0023172,FBgn0001624,FBgn0263111,FBgn0010575,FBgn0041604,FBgn0267791,FBgn0001075,FBgn0000479,FBgn0011817,FBgn0041092,FBgn0038975,FBgn0000179,FBgn0038197
GO:0016337	single organismal cell-cell adhesion	biological_process	0.00025991	0.0086346	7	259	60	12231	FBgn0039928,FBgn0001624,FBgn0039709,FBgn0001075,FBgn0264089,FBgn0004635,FBgn0000497
GO:0046716	muscle cell cellular homeostasis	biological_process	0.00026516	0.008779	5	259	28	12231	FBgn0032151,FBgn0260003,FBgn0010470,FBgn0034070,FBgn0265356
GO:0002064	epithelial cell development	biological_process	0.0002683	0.0088316	17	259	305	12231	FBgn0001624,FBgn0038826,FBgn0029881,FBgn0039709,FBgn0004859,FBgn0000182,FBgn0041092,FBgn0264442,FBgn0000413,FBgn0004635,FBgn0039704,FBgn0014343,FBgn0264695,FBgn0261963,FBgn0015600,FBgn0003118,FBgn0003392
GO:0001737	establishment of imaginal disc-derived wing hair orientation	biological_process	0.00026856	0.0088316	5	259	28	12231	FBgn0264272,FBgn0086898,FBgn0001075,FBgn0031903,FBgn0000497
GO:0006812	cation transport	biological_process	0.00028331	0.0092706	16	259	278	12231	FBgn0028704,FBgn0032593,FBgn0259145,FBgn0030872,FBgn0033494,FBgn0032151,FBgn0034911,FBgn0259822,FBgn0263397,FBgn0013995,FBgn0263111,FBgn0259111,FBgn0020307,FBgn0037766,FBgn0000036,FBgn0260964
GO:0042803	protein homodimerization activity	molecular_function	0.0002838	0.0092706	9	259	101	12231	FBgn0000413,FBgn0016694,FBgn0019968,FBgn0259234,FBgn0014343,FBgn0000024,FBgn0264695,FBgn0264001,FBgn0004859
GO:0061162	establishment of monopolar cell polarity	biological_process	0.00029192	0.0094723	4	259	16	12231	FBgn0000497,FBgn0001075,FBgn0259685,FBgn0264272
GO:0061339	establishment or maintenance of monopolar cell polarity	biological_process	0.00029192	0.0094723	4	259	16	12231	FBgn0001075,FBgn0264272,FBgn0259685,FBgn0000497
GO:0030707	ovarian follicle cell development	biological_process	0.00030747	0.0099269	16	259	280	12231	FBgn0038826,FBgn0029881,FBgn0001624,FBgn0004859,FBgn0039709,FBgn0004635,FBgn0014343,FBgn0041092,FBgn0000413,FBgn0264442,FBgn0000182,FBgn0003392,FBgn0261963,FBgn0264695,FBgn0015600,FBgn0003118
GO:0050908	detection of light stimulus involved in visual perception	biological_process	0.00030796	0.0099269	3	259	7	12231	FBgn0041604,FBgn0263111,FBgn0032593
GO:0098602	single organism cell adhesion	biological_process	0.00031931	0.010181	7	259	62	12231	FBgn0039928,FBgn0039709,FBgn0001624,FBgn0264089,FBgn0001075,FBgn0004635,FBgn0000497
GO:0002066	columnar/cuboidal epithelial cell development	biological_process	0.00031995	0.010181	16	259	281	12231	FBgn0039709,FBgn0004859,FBgn0001624,FBgn0038826,FBgn0029881,FBgn0261963,FBgn0264695,FBgn0003118,FBgn0015600,FBgn0003392,FBgn0041092,FBgn0264442,FBgn0000413,FBgn0000182,FBgn0014343,FBgn0004635
GO:0035023	regulation of Rho protein signal transduction	biological_process	0.00032001	0.010181	5	259	29	12231	FBgn0023172,FBgn0264707,FBgn0086901,FBgn0263706,FBgn0262562
GO:0045197	establishment or maintenance of epithelial cell apical/basal polarity	biological_process	0.00032001	0.010181	5	259	29	12231	FBgn0001624,FBgn0261451,FBgn0000497,FBgn0001075,FBgn0259685
GO:0044260	cellular macromolecule metabolic process	biological_process	0.00033906	0.010752	89	259	3042	12231	FBgn0039932,FBgn0086613,FBgn0052666,FBgn0259170,FBgn0267791,FBgn0262477,FBgn0263974,FBgn0001075,FBgn0016694,FBgn0004606,FBgn0004587,FBgn0004795,FBgn0032749,FBgn0001319,FBgn0261723,FBgn0028990,FBgn0019650,FBgn0086675,FBgn0004859,FBgn0265356,FBgn0039260,FBgn0001139,FBgn0051108,FBgn0020309,FBgn0038826,FBgn0024288,FBgn0263772,FBgn0023091,FBgn0261573,FBgn0003118,FBgn0038035,FBgn0015919,FBgn0000413,FBg…
GO:0002065	columnar/cuboidal epithelial cell differentiation	biological_process	0.00034625	0.010944	16	259	283	12231	FBgn0003392,FBgn0264695,FBgn0261963,FBgn0003118,FBgn0015600,FBgn0004635,FBgn0014343,FBgn0041092,FBgn0264442,FBgn0000413,FBgn0000182,FBgn0004859,FBgn0039709,FBgn0038826,FBgn0029881,FBgn0001624
GO:0048477	oogenesis	biological_process	0.00034773	0.010956	26	259	593	12231	FBgn0039709,FBgn0020299,FBgn0004859,FBgn0000210,FBgn0000114,FBgn0259685,FBgn0260397,FBgn0001624,FBgn0029881,FBgn0038826,FBgn0264695,FBgn0003118,FBgn0261963,FBgn0015600,FBgn0003392,FBgn0264442,FBgn0000413,FBgn0000479,FBgn0041092,FBgn0267727,FBgn0262975,FBgn0000182,FBgn0005630,FBgn0004795,FBgn0004635,FBgn0014343
GO:0044425	membrane part	cellular_component	0.00035848	0.011258	58	259	1771	12231	FBgn0034911,FBgn0262738,FBgn0004509,FBgn0034247,FBgn0001075,FBgn0083975,FBgn0028645,FBgn0259145,FBgn0263219,FBgn0000182,FBgn0026189,FBgn0041723,FBgn0010407,FBgn0264908,FBgn0039704,FBgn0053531,FBgn0265296,FBgn0266098,FBgn0086901,FBgn0260964,FBgn0261260,FBgn0262869,FBgn0037387,FBgn0261929,FBgn0004449,FBgn0259111,FBgn0260753,FBgn0038880,FBgn0025391,FBgn0263111,FBgn0039928,FBgn0000497,FBgn0259822,FBg…
GO:0007443	Malpighian tubule morphogenesis	biological_process	0.00039021	0.012147	6	259	46	12231	FBgn0262139,FBgn0003118,FBgn0004635,FBgn0086901,FBgn0259685,FBgn0000633
GO:0061333	renal tubule morphogenesis	biological_process	0.00039021	0.012147	6	259	46	12231	FBgn0259685,FBgn0086901,FBgn0004635,FBgn0000633,FBgn0003118,FBgn0262139
GO:0008039	synaptic target recognition	biological_process	0.0003905	0.012147	6	259	46	12231	FBgn0004509,FBgn0033791,FBgn0004449,FBgn0264442,FBgn0262509,FBgn0040271
GO:0000975	regulatory region DNA binding	molecular_function	0.00040686	0.012575	9	259	106	12231	FBgn0086613,FBgn0261963,FBgn0000210,FBgn0004859,FBgn0000448,FBgn0000413,FBgn0004606,FBgn0005624,FBgn0004795
GO:0001067	regulatory region nucleic acid binding	molecular_function	0.00040686	0.012575	9	259	106	12231	FBgn0004606,FBgn0000448,FBgn0000413,FBgn0004795,FBgn0005624,FBgn0261963,FBgn0086613,FBgn0000210,FBgn0004859
GO:0035317	imaginal disc-derived wing hair organization	biological_process	0.00043883	0.013499	6	259	47	12231	FBgn0264272,FBgn0001075,FBgn0086898,FBgn0000497,FBgn0031903,FBgn0003382
GO:0008586	imaginal disc-derived wing vein morphogenesis	biological_process	0.0004395	0.013499	6	259	47	12231	FBgn0004885,FBgn0011817,FBgn0003175,FBgn0086901,FBgn0260003,FBgn0004635
GO:0030856	regulation of epithelial cell differentiation	biological_process	0.00044623	0.01362	2	259	2	12231	FBgn0001624,FBgn0004859
GO:0015837	amine transport	biological_process	0.00044623	0.01362	2	259	2	12231	FBgn0260964,FBgn0263397
GO:0010631	epithelial cell migration	biological_process	0.00045361	0.013759	11	259	155	12231	FBgn0003392,FBgn0264695,FBgn0003118,FBgn0020299,FBgn0003499,FBgn0264089,FBgn0086901,FBgn0001320,FBgn0000182,FBgn0041092,FBgn0264442
GO:0090132	epithelium migration	biological_process	0.00045361	0.013759	11	259	155	12231	FBgn0086901,FBgn0264089,FBgn0264442,FBgn0041092,FBgn0000182,FBgn0001320,FBgn0003392,FBgn0003499,FBgn0020299,FBgn0003118,FBgn0264695
GO:0007167	enzyme linked receptor protein signaling pathway	biological_process	0.0004602	0.013916	14	259	234	12231	FBgn0003118,FBgn0029791,FBgn0039932,FBgn0020299,FBgn0041604,FBgn0040271,FBgn0038197,FBgn0086901,FBgn0004635,FBgn0053531,FBgn0025936,FBgn0003117,FBgn0041723,FBgn0010407
GO:0040007	growth	biological_process	0.00046539	0.014029	19	259	380	12231	FBgn0038197,FBgn0000179,FBgn0000479,FBgn0016694,FBgn0041092,FBgn0038975,FBgn0011817,FBgn0003392,FBgn0267791,FBgn0001075,FBgn0010575,FBgn0041604,FBgn0001624,FBgn0023172,FBgn0263111,FBgn0264607,FBgn0004360,FBgn0259685,FBgn0004449
GO:0061326	renal tubule development	biological_process	0.00047065	0.014101	7	259	66	12231	FBgn0086901,FBgn0259685,FBgn0004635,FBgn0000633,FBgn0003118,FBgn0262139,FBgn0000413
GO:0072002	Malpighian tubule development	biological_process	0.00047065	0.014101	7	259	66	12231	FBgn0004635,FBgn0086901,FBgn0259685,FBgn0000633,FBgn0262139,FBgn0003118,FBgn0000413
GO:0044702	single organism reproductive process	biological_process	0.0004752	0.014193	34	259	882	12231	FBgn0001624,FBgn0023172,FBgn0000299,FBgn0039709,FBgn0261563,FBgn0264607,FBgn0000210,FBgn0259685,FBgn0264442,FBgn0000413,FBgn0041092,FBgn0267727,FBgn0262975,FBgn0005630,FBgn0264089,FBgn0004635,FBgn0024288,FBgn0261963,FBgn0003118,FBgn0003392,FBgn0029881,FBgn0038826,FBgn0020299,FBgn0004859,FBgn0000114,FBgn0260397,FBgn0000479,FBgn0004606,FBgn0000182,FBgn0031903,FBgn0004795,FBgn0014343,FBgn0264695,FBg…
GO:0035315	hair cell differentiation	biological_process	0.00049277	0.014629	6	259	48	12231	FBgn0003382,FBgn0086898,FBgn0001075,FBgn0264272,FBgn0000497,FBgn0031903
GO:0035316	non-sensory hair organization	biological_process	0.00049277	0.014629	6	259	48	12231	FBgn0000497,FBgn0031903,FBgn0001075,FBgn0086898,FBgn0264272,FBgn0003382
GO:0048598	embryonic morphogenesis	biological_process	0.00050175	0.01485	14	259	236	12231	FBgn0020299,FBgn0003499,FBgn0085432,FBgn0003118,FBgn0259685,FBgn0001624,FBgn0023172,FBgn0262139,FBgn0000633,FBgn0000299,FBgn0004635,FBgn0264089,FBgn0003117,FBgn0086901
GO:0008283	cell proliferation	biological_process	0.00051907	0.015317	17	259	323	12231	FBgn0034903,FBgn0000114,FBgn0013469,FBgn0261451,FBgn0259685,FBgn0001624,FBgn0000497,FBgn0045852,FBgn0003118,FBgn0085432,FBgn0003392,FBgn0267791,FBgn0001075,FBgn0267727,FBgn0028397,FBgn0038197,FBgn0004635
GO:0007623	circadian rhythm	biological_process	0.00053516	0.015744	9	259	110	12231	FBgn0262738,FBgn0266418,FBgn0263397,FBgn0038197,FBgn0016694,FBgn0000479,FBgn0260753,FBgn0001624,FBgn0023407
GO:0098590	plasma membrane region	cellular_component	0.00054479	0.015979	12	259	184	12231	FBgn0264607,FBgn0259685,FBgn0004449,FBgn0032151,FBgn0039709,FBgn0261260,FBgn0000036,FBgn0086901,FBgn0001624,FBgn0023172,FBgn0263111,FBgn0039928
GO:0030111	regulation of Wnt signaling pathway	biological_process	0.00056556	0.016539	7	259	68	12231	FBgn0020309,FBgn0001075,FBgn0011817,FBgn0041604,FBgn0085432,FBgn0001139,FBgn0040271
GO:0060911	cardiac cell fate commitment	biological_process	0.00058972	0.017193	4	259	19	12231	FBgn0000633,FBgn0003117,FBgn0261963,FBgn0003118
GO:0009967	positive regulation of signal transduction	biological_process	0.00059233	0.017218	14	259	240	12231	FBgn0041604,FBgn0261573,FBgn0261451,FBgn0260660,FBgn0003392,FBgn0262562,FBgn0032388,FBgn0023172,FBgn0040271,FBgn0043070,FBgn0004635,FBgn0263706,FBgn0001319,FBgn0038197
GO:0048511	rhythmic process	biological_process	0.00061052	0.017694	9	259	112	12231	FBgn0266418,FBgn0262738,FBgn0016694,FBgn0260753,FBgn0000479,FBgn0001624,FBgn0023407,FBgn0263397,FBgn0038197
GO:0009913	epidermal cell differentiation	biological_process	0.00061606	0.017802	6	259	50	12231	FBgn0003382,FBgn0000497,FBgn0031903,FBgn0264272,FBgn0086898,FBgn0001075
GO:0060179	male mating behavior	biological_process	0.00061819	0.017811	7	259	69	12231	FBgn0263111,FBgn0264815,FBgn0086675,FBgn0001624,FBgn0262477,FBgn0004795,FBgn0264607
GO:0046578	regulation of Ras protein signal transduction	biological_process	0.00065058	0.018689	9	259	113	12231	FBgn0264707,FBgn0032388,FBgn0023172,FBgn0086901,FBgn0263706,FBgn0043070,FBgn0262562,FBgn0261570,FBgn0013469
GO:0090130	tissue migration	biological_process	0.00065829	0.018809	11	259	162	12231	FBgn0003392,FBgn0003499,FBgn0020299,FBgn0264695,FBgn0003118,FBgn0086901,FBgn0264089,FBgn0264442,FBgn0041092,FBgn0000182,FBgn0001320
GO:0007169	transmembrane receptor protein tyrosine kinase signaling pathway	biological_process	0.00065861	0.018809	11	259	162	12231	FBgn0029791,FBgn0003118,FBgn0020299,FBgn0053531,FBgn0025936,FBgn0004635,FBgn0086901,FBgn0038197,FBgn0041723,FBgn0010407,FBgn0040271
GO:0003705	transcription factor activity, RNA polymerase II distal enhancer sequence-specific binding	molecular_function	0.00067456	0.019208	7	259	70	12231	FBgn0019650,FBgn0085432,FBgn0004606,FBgn0004859,FBgn0038197,FBgn0015919,FBgn0040318
GO:0007010	cytoskeleton organization	biological_process	0.00068008	0.019309	27	259	654	12231	FBgn0040752,FBgn0265991,FBgn0025631,FBgn0041111,FBgn0000497,FBgn0265356,FBgn0052082,FBgn0264693,FBgn0023172,FBgn0001624,FBgn0001139,FBgn0029157,FBgn0000244,FBgn0025391,FBgn0003392,FBgn0001075,FBgn0085408,FBgn0264695,FBgn0015600,FBgn0264272,FBgn0086901,FBgn0038197,FBgn0000559,FBgn0267727,FBgn0000182,FBgn0019968,FBgn0262975
GO:0071396	cellular response to lipid	biological_process	0.00068361	0.019353	5	259	34	12231	FBgn0000210,FBgn0035849,FBgn0004914,FBgn0000448,FBgn0264490
GO:0048619	embryonic hindgut morphogenesis	biological_process	0.00068699	0.019361	6	259	51	12231	FBgn0086901,FBgn0259685,FBgn0004635,FBgn0000633,FBgn0003118,FBgn0262139
GO:0009584	detection of visible light	biological_process	0.00068786	0.019361	5	259	34	12231	FBgn0262738,FBgn0032593,FBgn0259234,FBgn0041604,FBgn0263111
GO:0001667	ameboidal-type cell migration	biological_process	0.000693	0.01945	11	259	163	12231	FBgn0264695,FBgn0003118,FBgn0003499,FBgn0020299,FBgn0003392,FBgn0001320,FBgn0000182,FBgn0264442,FBgn0041092,FBgn0086901,FBgn0264089
GO:0050877	neurological system process	biological_process	0.00069727	0.019514	23	259	521	12231	FBgn0262738,FBgn0259099,FBgn0003392,FBgn0053481,FBgn0052600,FBgn0262477,FBgn0041604,FBgn0030723,FBgn0032593,FBgn0005630,FBgn0004635,FBgn0266098,FBgn0033504,FBgn0038975,FBgn0000479,FBgn0040823,FBgn0264607,FBgn0034286,FBgn0041111,FBgn0051163,FBgn0029974,FBgn0000108,FBgn0263111
GO:0035222	wing disc pattern formation	biological_process	0.00073529	0.020519	7	259	71	12231	FBgn0003118,FBgn0041111,FBgn0041604,FBgn0010575,FBgn0000179,FBgn0004859,FBgn0000497
GO:1901363	heterocyclic compound binding	molecular_function	0.00075486	0.021005	76	259	2561	12231	FBgn0029157,FBgn0000448,FBgn0035849,FBgn0033791,FBgn0020307,FBgn0041111,FBgn0011481,FBgn0260397,FBgn0004914,FBgn0000114,FBgn0030738,FBgn0263873,FBgn0029824,FBgn0000182,FBgn0014343,FBgn0053531,FBgn0000179,FBgn0259234,FBgn0010407,FBgn0085432,FBgn0015032,FBgn0264001,FBgn0001320,FBgn0045852,FBgn0003499,FBgn0013469,FBgn0000557,FBgn0030558,FBgn0262139,FBgn0019968,FBgn0000559,FBgn0052423,FBgn0262636,FBg…
GO:0000977	RNA polymerase II regulatory region sequence-specific DNA binding	molecular_function	0.00076249	0.021157	6	259	52	12231	FBgn0000210,FBgn0004859,FBgn0004606,FBgn0261963,FBgn0000448,FBgn0000413
GO:0016198	axon choice point recognition	biological_process	0.00078717	0.021764	5	259	35	12231	FBgn0264442,FBgn0028645,FBgn0264089,FBgn0005630,FBgn0038498
GO:0008277	regulation of G-protein coupled receptor protein signaling pathway	biological_process	0.00078881	0.021764	5	259	35	12231	FBgn0023172,FBgn0085390,FBgn0038197,FBgn0262738,FBgn0259234
GO:0044456	synapse part	cellular_component	0.00087047	0.023949	10	259	142	12231	FBgn0001624,FBgn0263111,FBgn0039928,FBgn0261090,FBgn0000036,FBgn0040752,FBgn0260964,FBgn0264607,FBgn0004449,FBgn0032151
GO:0010002	cardioblast differentiation	biological_process	0.00088104	0.024172	4	259	21	12231	FBgn0003118,FBgn0261963,FBgn0000633,FBgn0003117
GO:0032879	regulation of localization	biological_process	0.00088658	0.024256	15	259	279	12231	FBgn0261260,FBgn0037766,FBgn0023091,FBgn0261563,FBgn0041111,FBgn0262738,FBgn0259685,FBgn0264693,FBgn0038975,FBgn0263111,FBgn0262975,FBgn0038197,FBgn0264089,FBgn0260003,FBgn0263397
GO:0004872	receptor activity	molecular_function	0.00089157	0.024324	21	259	465	12231	FBgn0004885,FBgn0083975,FBgn0010407,FBgn0004842,FBgn0025936,FBgn0053531,FBgn0038837,FBgn0001075,FBgn0260753,FBgn0000448,FBgn0052843,FBgn0038880,FBgn0000497,FBgn0035849,FBgn0261260,FBgn0030707,FBgn0000036,FBgn0025631,FBgn0262869,FBgn0261929,FBgn0004914
GO:0097159	organic cyclic compound binding	molecular_function	0.00090965	0.024748	76	259	2577	12231	FBgn0019968,FBgn0262139,FBgn0030558,FBgn0000559,FBgn0038197,FBgn0039920,FBgn0262636,FBgn0052423,FBgn0025936,FBgn0005630,FBgn0005624,FBgn0261963,FBgn0001320,FBgn0045852,FBgn0003499,FBgn0013469,FBgn0000557,FBgn0000182,FBgn0000179,FBgn0014343,FBgn0053531,FBgn0010407,FBgn0259234,FBgn0264001,FBgn0015032,FBgn0085432,FBgn0029157,FBgn0000448,FBgn0035849,FBgn0033791,FBgn0041111,FBgn0011481,FBgn0020307,FBg…
GO:0098589	membrane region	cellular_component	0.00095181	0.025823	12	259	196	12231	FBgn0039928,FBgn0263111,FBgn0023172,FBgn0001624,FBgn0086901,FBgn0000036,FBgn0039709,FBgn0261260,FBgn0004449,FBgn0032151,FBgn0259685,FBgn0264607
GO:0007498	mesoderm development	biological_process	0.00096067	0.025991	8	259	96	12231	FBgn0085432,FBgn0261563,FBgn0020299,FBgn0004914,FBgn0004606,FBgn0025391,FBgn0003117,FBgn0264089
GO:0048646	anatomical structure formation involved in morphogenesis	biological_process	0.00096351	0.025996	24	259	567	12231	FBgn0020299,FBgn0265991,FBgn0039709,FBgn0028369,FBgn0000114,FBgn0013469,FBgn0004859,FBgn0265356,FBgn0023172,FBgn0025391,FBgn0000497,FBgn0038826,FBgn0085432,FBgn0261963,FBgn0264695,FBgn0003392,FBgn0001075,FBgn0015919,FBgn0267727,FBgn0262139,FBgn0014343,FBgn0264089,FBgn0004635,FBgn0038197
GO:0031012	extracellular matrix	cellular_component	0.00099437	0.026695	12	259	197	12231	FBgn0041604,FBgn0261563,FBgn0039054,FBgn0029791,FBgn0051439,FBgn0260660,FBgn0261451,FBgn0004449,FBgn0051619,FBgn0000299,FBgn0032252,FBgn0264089
GO:0050808	synapse organization	biological_process	0.00099488	0.026695	12	259	197	12231	FBgn0264607,FBgn0004449,FBgn0041604,FBgn0040752,FBgn0266098,FBgn0001624,FBgn0083975,FBgn0011817,FBgn0038975,FBgn0263111,FBgn0000108,FBgn0039260
GO:0051056	regulation of small GTPase mediated signal transduction	biological_process	0.0010028	0.026804	9	259	120	12231	FBgn0086901,FBgn0263706,FBgn0043070,FBgn0264707,FBgn0032388,FBgn0023172,FBgn0262562,FBgn0261570,FBgn0013469
GO:0050962	detection of light stimulus involved in sensory perception	biological_process	0.0010072	0.026804	3	259	10	12231	FBgn0263111,FBgn0041604,FBgn0032593
GO:0016332	establishment or maintenance of polarity of embryonic epithelium	biological_process	0.0010072	0.026804	3	259	10	12231	FBgn0001624,FBgn0000633,FBgn0259685
GO:0007365	periodic partitioning	biological_process	0.0010217	0.027116	5	259	37	12231	FBgn0004859,FBgn0041604,FBgn0085432,FBgn0261963,FBgn0041111
GO:0004879	RNA polymerase II transcription factor activity, ligand-activated sequence-specific DNA binding	molecular_function	0.0010461	0.027615	4	259	22	12231	FBgn0000448,FBgn0001320,FBgn0035849,FBgn0004914
GO:0098531	transcription factor activity, direct ligand regulated sequence-specific DNA binding	molecular_function	0.0010461	0.027615	4	259	22	12231	FBgn0000448,FBgn0001320,FBgn0035849,FBgn0004914
GO:0048663	neuron fate commitment	biological_process	0.0011028	0.029018	7	259	76	12231	FBgn0000413,FBgn0261963,FBgn0003118,FBgn0000210,FBgn0005630,FBgn0005677,FBgn0261723
GO:0007619	courtship behavior	biological_process	0.0011052	0.029018	7	259	76	12231	FBgn0263111,FBgn0086675,FBgn0001624,FBgn0000479,FBgn0262477,FBgn0004795,FBgn0264607
GO:0001709	cell fate determination	biological_process	0.0011314	0.029625	10	259	147	12231	FBgn0001624,FBgn0004878,FBgn0001320,FBgn0262139,FBgn0000633,FBgn0003117,FBgn0004635,FBgn0261963,FBgn0085432,FBgn0013469
GO:0008092	cytoskeletal protein binding	molecular_function	0.0011392	0.029751	15	259	286	12231	FBgn0004449,FBgn0259685,FBgn0259099,FBgn0003392,FBgn0085408,FBgn0265991,FBgn0260003,FBgn0085376,FBgn0264272,FBgn0029157,FBgn0000244,FBgn0019968,FBgn0033504,FBgn0264693,FBgn0052082
GO:0034703	cation channel complex	cellular_component	0.0011574	0.030088	5	259	38	12231	FBgn0259145,FBgn0263111,FBgn0032593,FBgn0033494,FBgn0259822
GO:0006816	calcium ion transport	biological_process	0.0011583	0.030088	5	259	38	12231	FBgn0013995,FBgn0032593,FBgn0028704,FBgn0259822,FBgn0263111
GO:0000976	transcription regulatory region sequence-specific DNA binding	molecular_function	0.0011931	0.030911	7	259	77	12231	FBgn0000413,FBgn0000448,FBgn0261963,FBgn0004606,FBgn0004859,FBgn0004795,FBgn0000210
GO:0048609	multicellular organismal reproductive process	biological_process	0.0012023	0.031065	34	259	930	12231	FBgn0000182,FBgn0004606,FBgn0000479,FBgn0014343,FBgn0004795,FBgn0264695,FBgn0015600,FBgn0005677,FBgn0262477,FBgn0263111,FBgn0029881,FBgn0038826,FBgn0086675,FBgn0020299,FBgn0260397,FBgn0004859,FBgn0000114,FBgn0262975,FBgn0000413,FBgn0264442,FBgn0041092,FBgn0267727,FBgn0004635,FBgn0005630,FBgn0003118,FBgn0261963,FBgn0003392,FBgn0001624,FBgn0023172,FBgn0264815,FBgn0039709,FBgn0259685,FBgn0264607,FBg…
GO:0016477	cell migration	biological_process	0.0012415	0.031912	14	259	259	12231	FBgn0041092,FBgn0264442,FBgn0004606,FBgn0000182,FBgn0001320,FBgn0264089,FBgn0086901,FBgn0020299,FBgn0003499,FBgn0085408,FBgn0264695,FBgn0261563,FBgn0003118,FBgn0003392
GO:0090066	regulation of anatomical structure size	biological_process	0.0012423	0.031912	11	259	175	12231	FBgn0263980,FBgn0001075,FBgn0039709,FBgn0041111,FBgn0005630,FBgn0000497,FBgn0264272,FBgn0038197,FBgn0264442,FBgn0001320,FBgn0029157
GO:0001012	RNA polymerase II regulatory region DNA binding	molecular_function	0.0012448	0.031912	6	259	57	12231	FBgn0004606,FBgn0261963,FBgn0000448,FBgn0000413,FBgn0000210,FBgn0004859
GO:0016339	calcium-dependent cell-cell adhesion via plasma membrane cell adhesion molecules	biological_process	0.0012641	0.032319	4	259	23	12231	FBgn0039928,FBgn0039709,FBgn0001075,FBgn0000497
GO:0015085	calcium ion transmembrane transporter activity	molecular_function	0.001306	0.032887	5	259	39	12231	FBgn0263111,FBgn0259822,FBgn0032593,FBgn0013995,FBgn0028704
GO:0035088	establishment or maintenance of apical/basal cell polarity	biological_process	0.001306	0.032887	5	259	39	12231	FBgn0001624,FBgn0261451,FBgn0000497,FBgn0001075,FBgn0259685
GO:0061245	establishment or maintenance of bipolar cell polarity	biological_process	0.001306	0.032887	5	259	39	12231	FBgn0001624,FBgn0000497,FBgn0261451,FBgn0259685,FBgn0001075
GO:0001661	conditioned taste aversion	biological_process	0.0013199	0.032887	2	259	3	12231	FBgn0003392,FBgn0000479
GO:0005581	collagen trimer	cellular_component	0.0013199	0.032887	2	259	3	12231	FBgn0000299,FBgn0260660
GO:0061321	garland nephrocyte differentiation	biological_process	0.0013199	0.032887	2	259	3	12231	FBgn0028369,FBgn0004606
GO:0015872	dopamine transport	biological_process	0.0013199	0.032887	2	259	3	12231	FBgn0260964,FBgn0263397
GO:0018149	peptide cross-linking	biological_process	0.0013199	0.032887	2	259	3	12231	FBgn0000497,FBgn0001075
GO:0051937	catecholamine transport	biological_process	0.0013199	0.032887	2	259	3	12231	FBgn0263397,FBgn0260964
GO:0090176	microtubule cytoskeleton organization involved in establishment of planar polarity	biological_process	0.0013199	0.032887	2	259	3	12231	FBgn0001075,FBgn0000497
GO:0007271	synaptic transmission, cholinergic	biological_process	0.0013633	0.033709	3	259	11	12231	FBgn0000036,FBgn0032151,FBgn0000024
GO:0030859	polarized epithelial cell differentiation	biological_process	0.0013633	0.033709	3	259	11	12231	FBgn0000497,FBgn0001075,FBgn0259685
GO:0045198	establishment of epithelial cell apical/basal polarity	biological_process	0.0013633	0.033709	3	259	11	12231	FBgn0001075,FBgn0259685,FBgn0000497
GO:0005575	cellular_component	cellular_component	0.0014342	0.035372	223	259	9635	12231	FBgn0004795,FBgn0004587,FBgn0261723,FBgn0086901,FBgn0264695,FBgn0259170,FBgn0034911,FBgn0052666,FBgn0034247,FBgn0262477,FBgn0001075,FBgn0034145,FBgn0267791,FBgn0260753,FBgn0263111,FBgn0000108,FBgn0038826,FBgn0027844,FBgn0020309,FBgn0029881,FBgn0265991,FBgn0260964,FBgn0028369,FBgn0004859,FBgn0038975,FBgn0032388,FBgn0264442,FBgn0262975,FBgn0004878,FBgn0264089,FBgn0259245,FBgn0023091,FBgn0038652,FBg…
GO:0035010	encapsulation of foreign target	biological_process	0.0014597	0.035912	5	259	40	12231	FBgn0259099,FBgn0259170,FBgn0025936,FBgn0028990,FBgn0264707
GO:0008406	gonad development	biological_process	0.0014865	0.036387	6	259	59	12231	FBgn0005630,FBgn0031903,FBgn0264089,FBgn0024288,FBgn0004606,FBgn0261563
GO:0045137	development of primary sexual characteristics	biological_process	0.0014865	0.036387	6	259	59	12231	FBgn0264089,FBgn0005630,FBgn0031903,FBgn0261563,FBgn0004606,FBgn0024288
GO:0009583	detection of light stimulus	biological_process	0.0014941	0.036483	6	259	59	12231	FBgn0041604,FBgn0263111,FBgn0262738,FBgn0013995,FBgn0259234,FBgn0032593
GO:0045177	apical part of cell	cellular_component	0.0015184	0.036983	8	259	103	12231	FBgn0004635,FBgn0263111,FBgn0264693,FBgn0001624,FBgn0023172,FBgn0259685,FBgn0261260,FBgn0039709
GO:0007626	locomotory behavior	biological_process	0.0015612	0.03793	11	259	180	12231	FBgn0263111,FBgn0264693,FBgn0260753,FBgn0000479,FBgn0001624,FBgn0263397,FBgn0038197,FBgn0005630,FBgn0010575,FBgn0262738,FBgn0259099
GO:0007442	hindgut morphogenesis	biological_process	0.0016303	0.03938	6	259	60	12231	FBgn0003118,FBgn0262139,FBgn0259685,FBgn0086901,FBgn0004635,FBgn0000633
GO:0061525	hindgut development	biological_process	0.0016303	0.03938	6	259	60	12231	FBgn0000633,FBgn0004635,FBgn0259685,FBgn0086901,FBgn0262139,FBgn0003118
GO:0003013	circulatory system process	biological_process	0.001637	0.03938	5	259	41	12231	FBgn0033494,FBgn0003117,FBgn0263111,FBgn0025391,FBgn0261963
GO:0003015	heart process	biological_process	0.001637	0.03938	5	259	41	12231	FBgn0003117,FBgn0033494,FBgn0263111,FBgn0025391,FBgn0261963
GO:0007548	sex differentiation	biological_process	0.001712	0.041084	8	259	105	12231	FBgn0264089,FBgn0031903,FBgn0005630,FBgn0004606,FBgn0005677,FBgn0000210,FBgn0261563,FBgn0024288
GO:0044212	transcription regulatory region DNA binding	molecular_function	0.0017167	0.041095	8	259	105	12231	FBgn0261963,FBgn0000210,FBgn0004859,FBgn0004606,FBgn0000448,FBgn0000413,FBgn0005624,FBgn0004795
GO:0007266	Rho protein signal transduction	biological_process	0.0018327	0.043766	5	259	42	12231	FBgn0086901,FBgn0263706,FBgn0262562,FBgn0023172,FBgn0264707
GO:0048870	cell motility	biological_process	0.0019009	0.045284	14	259	271	12231	FBgn0003499,FBgn0020299,FBgn0261563,FBgn0264695,FBgn0003118,FBgn0085408,FBgn0003392,FBgn0264442,FBgn0041092,FBgn0001320,FBgn0004606,FBgn0000182,FBgn0086901,FBgn0264089
GO:0051704	multi-organism process	biological_process	0.0019276	0.045809	42	259	1260	12231	FBgn0264442,FBgn0000413,FBgn0267727,FBgn0041092,FBgn0262975,FBgn0005630,FBgn0010470,FBgn0038197,FBgn0004635,FBgn0261963,FBgn0003118,FBgn0003392,FBgn0001624,FBgn0023172,FBgn0003117,FBgn0039709,FBgn0264815,FBgn0034070,FBgn0264607,FBgn0000210,FBgn0259685,FBgn0000479,FBgn0000182,FBgn0004606,FBgn0004795,FBgn0001319,FBgn0014343,FBgn0264695,FBgn0015600,FBgn0003175,FBgn0262477,FBgn0263111,FBgn0029881,FBg…
GO:0008049	male courtship behavior	biological_process	0.0019337	0.045841	6	259	62	12231	FBgn0264607,FBgn0004795,FBgn0262477,FBgn0001624,FBgn0086675,FBgn0263111
GO:0007367	segment polarity determination	biological_process	0.0020267	0.047867	4	259	26	12231	FBgn0261963,FBgn0085432,FBgn0041604,FBgn0004859
GO:0071407	cellular response to organic cyclic compound	biological_process	0.002029	0.047867	5	259	43	12231	FBgn0000448,FBgn0264490,FBgn0004914,FBgn0000210,FBgn0035849
GO:0030001	metal ion transport	biological_process	0.0020439	0.048104	10	259	159	12231	FBgn0020307,FBgn0037766,FBgn0259111,FBgn0033494,FBgn0263111,FBgn0259822,FBgn0263397,FBgn0028704,FBgn0032593,FBgn0013995
GO:0042461	photoreceptor cell development	biological_process	0.0020547	0.04824	8	259	108	12231	FBgn0010575,FBgn0041111,FBgn0003118,FBgn0034070,FBgn0259685,FBgn0005677,FBgn0004449,FBgn0005630
GO:0010769	regulation of cell morphogenesis involved in differentiation	biological_process	0.0021003	0.049194	6	259	63	12231	FBgn0001319,FBgn0264272,FBgn0086901,FBgn0045852,FBgn0029157,FBgn0023172
GO:0022836	gated channel activity	molecular_function	0.0021362	0.049915	10	259	160	12231	FBgn0032151,FBgn0038837,FBgn0033494,FBgn0000036,FBgn0030707,FBgn0264908,FBgn0259822,FBgn0263397,FBgn0259145,FBgn0263111
GO:0005261	cation channel activity	molecular_function	0.0021772	0.050751	8	259	109	12231	FBgn0263111,FBgn0259145,FBgn0263397,FBgn0259822,FBgn0032593,FBgn0000036,FBgn0032151,FBgn0033494
GO:0009719	response to endogenous stimulus	biological_process	0.002198	0.051114	11	259	188	12231	FBgn0040271,FBgn0000448,FBgn0264490,FBgn0003117,FBgn0000024,FBgn0038197,FBgn0035849,FBgn0025631,FBgn0020299,FBgn0039932,FBgn0004914
GO:0014019	neuroblast development	biological_process	0.0022821	0.052944	3	259	13	12231	FBgn0013469,FBgn0004878,FBgn0261963
GO:0035089	establishment of apical/basal cell polarity	biological_process	0.0022901	0.053003	3	259	13	12231	FBgn0000497,FBgn0001075,FBgn0259685
GO:0008081	phosphoric diester hydrolase activity	molecular_function	0.002338	0.053985	4	259	27	12231	FBgn0044328,FBgn0000479,FBgn0264815,FBgn0262738
GO:0051674	localization of cell	biological_process	0.0024852	0.057246	14	259	279	12231	FBgn0003392,FBgn0003499,FBgn0020299,FBgn0264695,FBgn0003118,FBgn0261563,FBgn0085408,FBgn0086901,FBgn0264089,FBgn0264442,FBgn0041092,FBgn0001320,FBgn0004606,FBgn0000182
GO:0007510	cardioblast cell fate determination	biological_process	0.0026023	0.0594	2	259	4	12231	FBgn0000633,FBgn0003117
GO:0060913	cardiac cell fate determination	biological_process	0.0026023	0.0594	2	259	4	12231	FBgn0003117,FBgn0000633
GO:0004115	3',5'-cyclic-AMP phosphodiesterase activity	molecular_function	0.002603	0.0594	2	259	4	12231	FBgn0000479,FBgn0264815
GO:0015844	monoamine transport	biological_process	0.002603	0.0594	2	259	4	12231	FBgn0263397,FBgn0260964
GO:0048584	positive regulation of response to stimulus	biological_process	0.0026252	0.059768	16	259	343	12231	FBgn0041604,FBgn0261573,FBgn0003392,FBgn0262562,FBgn0032388,FBgn0038197,FBgn0263706,FBgn0001319,FBgn0004635,FBgn0266418,FBgn0261451,FBgn0260660,FBgn0023172,FBgn0040271,FBgn0043070,FBgn0263397
GO:0022412	cellular process involved in reproduction in multicellular organism	biological_process	0.0026397	0.059958	28	259	754	12231	FBgn0039709,FBgn0020299,FBgn0259685,FBgn0260397,FBgn0004859,FBgn0000114,FBgn0000210,FBgn0023172,FBgn0001624,FBgn0029881,FBgn0038826,FBgn0264695,FBgn0003118,FBgn0261963,FBgn0015600,FBgn0003392,FBgn0262975,FBgn0000182,FBgn0004606,FBgn0000479,FBgn0264442,FBgn0000413,FBgn0041092,FBgn0267727,FBgn0004635,FBgn0014343,FBgn0005630,FBgn0004795
GO:0019953	sexual reproduction	biological_process	0.0026479	0.060005	33	259	938	12231	FBgn0004606,FBgn0000182,FBgn0000479,FBgn0014343,FBgn0004795,FBgn0264695,FBgn0015600,FBgn0262477,FBgn0263111,FBgn0029881,FBgn0038826,FBgn0086675,FBgn0020299,FBgn0260397,FBgn0004859,FBgn0000114,FBgn0262975,FBgn0264442,FBgn0000413,FBgn0041092,FBgn0267727,FBgn0004635,FBgn0005630,FBgn0261963,FBgn0003118,FBgn0003392,FBgn0023172,FBgn0001624,FBgn0264815,FBgn0039709,FBgn0259685,FBgn0264607,FBgn0000210
GO:0005089	Rho guanyl-nucleotide exchange factor activity	molecular_function	0.0026903	0.060825	4	259	28	12231	FBgn0263706,FBgn0262562,FBgn0023172,FBgn0264707
GO:0007446	imaginal disc growth	biological_process	0.0027463	0.061947	5	259	46	12231	FBgn0010575,FBgn0041604,FBgn0267791,FBgn0259685,FBgn0001075
GO:0048864	stem cell development	biological_process	0.0028602	0.063693	3	259	14	12231	FBgn0004878,FBgn0261963,FBgn0013469
GO:2000736	regulation of stem cell differentiation	biological_process	0.0028605	0.063693	3	259	14	12231	FBgn0003118,FBgn0261963,FBgn0000114
GO:0016328	lateral plasma membrane	cellular_component	0.002866	0.063693	3	259	14	12231	FBgn0023172,FBgn0082585,FBgn0001624
GO:0035265	organ growth	biological_process	0.0028668	0.063693	6	259	67	12231	FBgn0041604,FBgn0010575,FBgn0000179,FBgn0267791,FBgn0259685,FBgn0001075
GO:0046011	regulation of oskar mRNA translation	biological_process	0.0028684	0.063693	3	259	14	12231	FBgn0000182,FBgn0000114,FBgn0038826
GO:0005604	basement membrane	cellular_component	0.0028694	0.063693	3	259	14	12231	FBgn0261563,FBgn0000299,FBgn0261451
GO:0090162	establishment of epithelial cell polarity	biological_process	0.0028694	0.063693	3	259	14	12231	FBgn0001075,FBgn0259685,FBgn0000497
GO:0007281	germ cell development	biological_process	0.0029024	0.06428	26	259	687	12231	FBgn0259685,FBgn0260397,FBgn0004859,FBgn0000114,FBgn0000210,FBgn0039709,FBgn0020299,FBgn0029881,FBgn0038826,FBgn0001624,FBgn0003392,FBgn0261963,FBgn0264695,FBgn0003118,FBgn0015600,FBgn0004635,FBgn0014343,FBgn0005630,FBgn0004795,FBgn0262975,FBgn0000182,FBgn0264442,FBgn0000413,FBgn0000479,FBgn0041092,FBgn0267727
GO:0044238	primary metabolic process	biological_process	0.0029824	0.065902	114	259	4361	12231	FBgn0033915,FBgn0032194,FBgn0259685,FBgn0004360,FBgn0000210,FBgn0264607,FBgn0032955,FBgn0264490,FBgn0003117,FBgn0001138,FBgn0038035,FBgn0261573,FBgn0003118,FBgn0023091,FBgn0024288,FBgn0263772,FBgn0015919,FBgn0262975,FBgn0263132,FBgn0004878,FBgn0032388,FBgn0011817,FBgn0000413,FBgn0264442,FBgn0004635,FBgn0040318,FBgn0005636,FBgn0010470,FBgn0086675,FBgn0028990,FBgn0019650,FBgn0039277,FBgn0004859,FBg…
GO:0070838	divalent metal ion transport	biological_process	0.0030335	0.066731	5	259	47	12231	FBgn0259822,FBgn0032593,FBgn0013995,FBgn0028704,FBgn0263111
GO:0072511	divalent inorganic cation transport	biological_process	0.0030335	0.066731	5	259	47	12231	FBgn0263111,FBgn0259822,FBgn0028704,FBgn0013995,FBgn0032593
GO:0009755	hormone-mediated signaling pathway	biological_process	0.0030518	0.066953	4	259	29	12231	FBgn0264490,FBgn0000448,FBgn0035849,FBgn0004914
GO:0050803	regulation of synapse structure or activity	biological_process	0.0030634	0.066953	9	259	141	12231	FBgn0260003,FBgn0263111,FBgn0019968,FBgn0001624,FBgn0038975,FBgn0011817,FBgn0038837,FBgn0003392,FBgn0264607
GO:0035051	cardiocyte differentiation	biological_process	0.0030642	0.066953	4	259	29	12231	FBgn0261963,FBgn0003118,FBgn0000633,FBgn0003117
GO:0009581	detection of external stimulus	biological_process	0.0030997	0.067427	6	259	68	12231	FBgn0263111,FBgn0041604,FBgn0262738,FBgn0013995,FBgn0259234,FBgn0032593
GO:0009582	detection of abiotic stimulus	biological_process	0.0030997	0.067427	6	259	68	12231	FBgn0041604,FBgn0263111,FBgn0032593,FBgn0262738,FBgn0259234,FBgn0013995
GO:0042051	compound eye photoreceptor development	biological_process	0.0031317	0.067828	7	259	91	12231	FBgn0004449,FBgn0005677,FBgn0259685,FBgn0005630,FBgn0034070,FBgn0003118,FBgn0041111
GO:0031344	regulation of cell projection organization	biological_process	0.003132	0.067828	7	259	91	12231	FBgn0086901,FBgn0001319,FBgn0264607,FBgn0045852,FBgn0029157,FBgn0039709,FBgn0023172
GO:0071495	cellular response to endogenous stimulus	biological_process	0.0032039	0.069217	9	259	142	12231	FBgn0035849,FBgn0038197,FBgn0003117,FBgn0264490,FBgn0000448,FBgn0040271,FBgn0004914,FBgn0039932,FBgn0020299
GO:0007617	mating behavior	biological_process	0.0032103	0.069217	8	259	116	12231	FBgn0264607,FBgn0262477,FBgn0264815,FBgn0086675,FBgn0004795,FBgn0001624,FBgn0000479,FBgn0263111
GO:0022603	regulation of anatomical structure morphogenesis	biological_process	0.0032796	0.070554	13	259	257	12231	FBgn0004449,FBgn0052666,FBgn0013469,FBgn0262738,FBgn0028369,FBgn0001319,FBgn0264272,FBgn0086901,FBgn0039704,FBgn0000497,FBgn0045852,FBgn0029157,FBgn0023172
GO:0044703	multi-organism reproductive process	biological_process	0.0034494	0.073808	33	259	954	12231	FBgn0262477,FBgn0264695,FBgn0015600,FBgn0014343,FBgn0004795,FBgn0004606,FBgn0000182,FBgn0000479,FBgn0260397,FBgn0004859,FBgn0000114,FBgn0086675,FBgn0020299,FBgn0029881,FBgn0038826,FBgn0263111,FBgn0003392,FBgn0261963,FBgn0003118,FBgn0004635,FBgn0005630,FBgn0262975,FBgn0264442,FBgn0000413,FBgn0041092,FBgn0267727,FBgn0259685,FBgn0264607,FBgn0000210,FBgn0264815,FBgn0039709,FBgn0001624,FBgn0023172
GO:0035011	melanotic encapsulation of foreign target	biological_process	0.0034646	0.073808	4	259	30	12231	FBgn0259099,FBgn0025936,FBgn0028990,FBgn0264707
GO:0008015	blood circulation	biological_process	0.0034763	0.073808	4	259	30	12231	FBgn0263111,FBgn0025391,FBgn0003117,FBgn0033494
GO:0060047	heart contraction	biological_process	0.0034763	0.073808	4	259	30	12231	FBgn0033494,FBgn0003117,FBgn0025391,FBgn0263111
GO:0048542	lymph gland development	biological_process	0.0034786	0.073808	4	259	30	12231	FBgn0003117,FBgn0001319,FBgn0267727,FBgn0004606
GO:0005516	calmodulin binding	molecular_function	0.0034837	0.073808	4	259	30	12231	FBgn0011826,FBgn0259234,FBgn0264607,FBgn0264815
GO:0045570	regulation of imaginal disc growth	biological_process	0.0034837	0.073808	4	259	30	12231	FBgn0001075,FBgn0259685,FBgn0041604,FBgn0010575
GO:0035025	positive regulation of Rho protein signal transduction	biological_process	0.003531	0.074142	3	259	15	12231	FBgn0262562,FBgn0263706,FBgn0023172
GO:0044420	extracellular matrix component	cellular_component	0.003531	0.074142	3	259	15	12231	FBgn0000299,FBgn0261451,FBgn0261563
GO:0050919	negative chemotaxis	biological_process	0.003531	0.074142	3	259	15	12231	FBgn0040271,FBgn0264089,FBgn0033791
GO:0070588	calcium ion transmembrane transport	biological_process	0.003531	0.074142	3	259	15	12231	FBgn0032593,FBgn0259822,FBgn0263111
GO:0042462	eye photoreceptor cell development	biological_process	0.0035375	0.074142	7	259	93	12231	FBgn0034070,FBgn0041111,FBgn0003118,FBgn0005677,FBgn0004449,FBgn0259685,FBgn0005630
GO:0048546	digestive tract morphogenesis	biological_process	0.0035839	0.074955	6	259	70	12231	FBgn0004635,FBgn0259685,FBgn0086901,FBgn0000633,FBgn0262139,FBgn0003118
GO:0072509	divalent inorganic cation transmembrane transporter activity	molecular_function	0.0036443	0.076055	5	259	49	12231	FBgn0028704,FBgn0013995,FBgn0032593,FBgn0259822,FBgn0263111
GO:0051960	regulation of nervous system development	biological_process	0.0037655	0.078417	12	259	231	12231	FBgn0045852,FBgn0086901,FBgn0001319,FBgn0011817,FBgn0023172,FBgn0001624,FBgn0029157,FBgn0263111,FBgn0013469,FBgn0264607,FBgn0261963,FBgn0003118
GO:0007173	epidermal growth factor receptor signaling pathway	biological_process	0.0038469	0.079773	6	259	71	12231	FBgn0003118,FBgn0029791,FBgn0040271,FBgn0041723,FBgn0086901,FBgn0004635
GO:0038127	ERBB signaling pathway	biological_process	0.0038469	0.079773	6	259	71	12231	FBgn0040271,FBgn0029791,FBgn0003118,FBgn0004635,FBgn0086901,FBgn0041723
GO:0003012	muscle system process	biological_process	0.0039313	0.08135	4	259	31	12231	FBgn0264695,FBgn0265356,FBgn0033494,FBgn0260660
GO:0031594	neuromuscular junction	cellular_component	0.0039806	0.082196	5	259	50	12231	FBgn0038975,FBgn0260964,FBgn0041604,FBgn0001624,FBgn0004449
GO:0004089	carbonate dehydratase activity	molecular_function	0.0041821	0.086174	3	259	16	12231	FBgn0027844,FBgn0030056,FBgn0052698
GO:0008307	structural constituent of muscle	molecular_function	0.0042705	0.086555	3	259	16	12231	FBgn0025391,FBgn0264695,FBgn0260003
GO:0004948	calcitonin receptor activity	molecular_function	0.0042757	0.086555	2	259	5	12231	FBgn0260753,FBgn0052843
GO:0097642	calcitonin family receptor activity	molecular_function	0.0042757	0.086555	2	259	5	12231	FBgn0052843,FBgn0260753
GO:0048172	regulation of short-term neuronal synaptic plasticity	biological_process	0.0042778	0.086555	2	259	5	12231	FBgn0003392,FBgn0260003
GO:0005221	intracellular cyclic nucleotide activated cation channel activity	molecular_function	0.0042778	0.086555	2	259	5	12231	FBgn0259145,FBgn0263397
GO:0043855	cyclic nucleotide-gated ion channel activity	molecular_function	0.0042778	0.086555	2	259	5	12231	FBgn0259145,FBgn0263397
GO:0007502	digestive tract mesoderm development	biological_process	0.0042778	0.086555	2	259	5	12231	FBgn0261563,FBgn0264089
GO:0007584	response to nutrient	biological_process	0.0042785	0.086555	3	259	16	12231	FBgn0016694,FBgn0263397,FBgn0003392
GO:0060284	regulation of cell development	biological_process	0.0042803	0.086555	11	259	205	12231	FBgn0023172,FBgn0001624,FBgn0262975,FBgn0029157,FBgn0045852,FBgn0001319,FBgn0264272,FBgn0086901,FBgn0003118,FBgn0262738,FBgn0013469
GO:0043062	extracellular structure organization	biological_process	0.0043326	0.08737	5	259	51	12231	FBgn0003392,FBgn0032252,FBgn0260660,FBgn0039709,FBgn0267727
GO:0030431	sleep	biological_process	0.0043385	0.08737	5	259	51	12231	FBgn0041723,FBgn0011826,FBgn0263397,FBgn0083975,FBgn0266418
GO:0060070	canonical Wnt signaling pathway	biological_process	0.0043997	0.088337	4	259	32	12231	FBgn0004360,FBgn0031903,FBgn0085432,FBgn0001139
GO:0007611	learning or memory	biological_process	0.0044144	0.088337	9	259	149	12231	FBgn0004635,FBgn0266098,FBgn0038975,FBgn0000479,FBgn0000108,FBgn0264607,FBgn0003392,FBgn0262477,FBgn0041111
GO:0050890	cognition	biological_process	0.0044144	0.088337	9	259	149	12231	FBgn0041111,FBgn0262477,FBgn0003392,FBgn0264607,FBgn0000108,FBgn0038975,FBgn0000479,FBgn0004635,FBgn0266098
GO:0050839	cell adhesion molecule binding	molecular_function	0.0044227	0.088337	4	259	32	12231	FBgn0028369,FBgn0262869,FBgn0001075,FBgn0000497
GO:0007276	gamete generation	biological_process	0.0044663	0.089026	29	259	820	12231	FBgn0023172,FBgn0001624,FBgn0029881,FBgn0038826,FBgn0039709,FBgn0020299,FBgn0264607,FBgn0004859,FBgn0000114,FBgn0000210,FBgn0259685,FBgn0260397,FBgn0264442,FBgn0000479,FBgn0000413,FBgn0041092,FBgn0267727,FBgn0262975,FBgn0004606,FBgn0000182,FBgn0005630,FBgn0004795,FBgn0014343,FBgn0004635,FBgn0264695,FBgn0003118,FBgn0261963,FBgn0015600,FBgn0003392
GO:0007265	Ras protein signal transduction	biological_process	0.0046032	0.091566	10	259	178	12231	FBgn0003118,FBgn0013469,FBgn0262562,FBgn0261570,FBgn0023172,FBgn0032388,FBgn0264707,FBgn0043070,FBgn0086901,FBgn0263706
GO:0035152	regulation of tube architecture, open tracheal system	biological_process	0.0047095	0.093487	6	259	74	12231	FBgn0001320,FBgn0000497,FBgn0003392,FBgn0001075,FBgn0004635,FBgn0086901
GO:0016324	apical plasma membrane	cellular_component	0.0047189	0.093487	5	259	52	12231	FBgn0263111,FBgn0261260,FBgn0039709,FBgn0023172,FBgn0259685
GO:0071704	organic substance metabolic process	biological_process	0.0047385	0.093686	121	259	4736	12231	FBgn0259099,FBgn0005677,FBgn0264001,FBgn0029791,FBgn0085432,FBgn0031903,FBgn0010407,FBgn0259234,FBgn0000179,FBgn0014343,FBgn0053531,FBgn0264707,FBgn0000182,FBgn0030738,FBgn0000114,FBgn0004914,FBgn0260397,FBgn0034903,FBgn0041111,FBgn0011481,FBgn0020307,FBgn0000497,FBgn0035849,FBgn0033791,FBgn0031530,FBgn0000448,FBgn0013531,FBgn0029157,FBgn0032536,FBgn0259175,FBgn0010575,FBgn0261963,FBgn0005630,FBg…
GO:0003779	actin binding	molecular_function	0.0048181	0.095067	8	259	124	12231	FBgn0052082,FBgn0029157,FBgn0000244,FBgn0085376,FBgn0260003,FBgn0264272,FBgn0085408,FBgn0003392
GO:0022843	voltage-gated cation channel activity	molecular_function	0.0049469	0.097281	4	259	33	12231	FBgn0263111,FBgn0263397,FBgn0259822,FBgn0033494
GO:0008589	regulation of smoothened signaling pathway	biological_process	0.0049502	0.097281	4	259	33	12231	FBgn0041604,FBgn0010575,FBgn0001139,FBgn0040271
GO:0009628	response to abiotic stimulus	biological_process	0.0050622	0.099282	16	259	367	12231	FBgn0041604,FBgn0262738,FBgn0003392,FBgn0267727,FBgn0011817,FBgn0000479,FBgn0259234,FBgn0032593,FBgn0052423,FBgn0000024,FBgn0000210,FBgn0001624,FBgn0264490,FBgn0260753,FBgn0263111,FBgn0013995
GO:0033993	response to lipid	biological_process	0.0051034	0.09989	5	259	53	12231	FBgn0004914,FBgn0035849,FBgn0000210,FBgn0264490,FBgn0000448
GO:0048520	positive regulation of behavior	biological_process	0.0051149	0.099915	3	259	17	12231	FBgn0266418,FBgn0263397,FBgn0038197
GO:0002121	inter-male aggressive behavior	biological_process	0.0055065	0.10735	5	259	54	12231	FBgn0261570,FBgn0010470,FBgn0000114,FBgn0005630,FBgn0003175
GO:0046983	protein dimerization activity	molecular_function	0.0055905	0.10877	15	259	338	12231	FBgn0000413,FBgn0016694,FBgn0041092,FBgn0262975,FBgn0019968,FBgn0262139,FBgn0259234,FBgn0001319,FBgn0014343,FBgn0000024,FBgn0003117,FBgn0023091,FBgn0264695,FBgn0264001,FBgn0004859
GO:0043401	steroid hormone mediated signaling pathway	biological_process	0.0059996	0.11584	3	259	18	12231	FBgn0000448,FBgn0035849,FBgn0004914
GO:0048545	response to steroid hormone	biological_process	0.0059996	0.11584	3	259	18	12231	FBgn0000448,FBgn0004914,FBgn0035849
GO:0071383	cellular response to steroid hormone stimulus	biological_process	0.0059996	0.11584	3	259	18	12231	FBgn0004914,FBgn0035849,FBgn0000448
GO:0060538	skeletal muscle organ development	biological_process	0.0060013	0.11584	5	259	55	12231	FBgn0264442,FBgn0264693,FBgn0003499,FBgn0033504,FBgn0001319
GO:0045879	negative regulation of smoothened signaling pathway	biological_process	0.0060425	0.11641	3	259	18	12231	FBgn0040271,FBgn0001139,FBgn0010575
GO:0003674	molecular_function	molecular_function	0.0060686	0.11668	250	259	11336	12231	FBgn0261260,FBgn0028990,FBgn0019650,FBgn0086675,FBgn0266418,FBgn0036732,FBgn0264449,FBgn0261570,FBgn0051612,FBgn0086758,FBgn0265356,FBgn0039260,FBgn0025391,FBgn0038880,FBgn0001139,FBgn0032252,FBgn0051108,FBgn0039932,FBgn0086613,FBgn0038156,FBgn0039054,FBgn0085408,FBgn0004509,FBgn0052600,FBgn0262738,FBgn0263974,FBgn0259145,FBgn0263219,FBgn0000479,FBgn0016694,FBgn0040823,FBgn0004606,FBgn0039832,FBg…
GO:0030198	extracellular matrix organization	biological_process	0.0061261	0.11755	4	259	35	12231	FBgn0039709,FBgn0003392,FBgn0032252,FBgn0260660
GO:0004983	neuropeptide Y receptor activity	molecular_function	0.006252	0.11973	2	259	6	12231	FBgn0004842,FBgn0038880
GO:0007508	larval heart development	biological_process	0.0063055	0.11976	2	259	6	12231	FBgn0032252,FBgn0082585
GO:0007541	sex determination, primary response to X:A ratio	biological_process	0.0063256	0.11976	2	259	6	12231	FBgn0001139,FBgn0000413
GO:0009608	response to symbiont	biological_process	0.0063271	0.11976	2	259	6	12231	FBgn0001319,FBgn0000210
GO:0007637	proboscis extension reflex	biological_process	0.0063272	0.11976	2	259	6	12231	FBgn0003392,FBgn0263397
GO:0060004	reflex	biological_process	0.0063272	0.11976	2	259	6	12231	FBgn0263397,FBgn0003392
GO:0005891	voltage-gated calcium channel complex	cellular_component	0.0063272	0.11976	2	259	6	12231	FBgn0263111,FBgn0259822
GO:0007618	mating	biological_process	0.0063821	0.12034	8	259	130	12231	FBgn0264607,FBgn0262477,FBgn0264815,FBgn0086675,FBgn0004795,FBgn0001624,FBgn0000479,FBgn0263111
GO:0009416	response to light stimulus	biological_process	0.0063825	0.12034	8	259	130	12231	FBgn0041604,FBgn0262738,FBgn0263111,FBgn0001624,FBgn0000024,FBgn0259234,FBgn0013995,FBgn0032593
GO:0030594	neurotransmitter receptor activity	molecular_function	0.0064603	0.12158	5	259	56	12231	FBgn0038880,FBgn0260753,FBgn0000036,FBgn0052843,FBgn0004842
GO:0005912	adherens junction	cellular_component	0.0064963	0.12202	6	259	79	12231	FBgn0259685,FBgn0033504,FBgn0265991,FBgn0085408,FBgn0000244,FBgn0028369
GO:0035218	leg disc development	biological_process	0.0065201	0.12223	7	259	104	12231	FBgn0052666,FBgn0000497,FBgn0005677,FBgn0004635,FBgn0263706,FBgn0020307,FBgn0261963
GO:1902495	transmembrane transporter complex	cellular_component	0.0066749	0.12465	8	259	131	12231	FBgn0000036,FBgn0033494,FBgn0032151,FBgn0263111,FBgn0259145,FBgn0264908,FBgn0259822,FBgn0032593
GO:1990351	transporter complex	cellular_component	0.0066749	0.12465	8	259	131	12231	FBgn0264908,FBgn0259822,FBgn0032593,FBgn0263111,FBgn0259145,FBgn0033494,FBgn0032151,FBgn0000036
GO:0005216	ion channel activity	molecular_function	0.0067284	0.12523	11	259	218	12231	FBgn0000036,FBgn0030707,FBgn0032151,FBgn0038837,FBgn0033494,FBgn0259145,FBgn0263111,FBgn0032593,FBgn0259822,FBgn0264908,FBgn0263397
GO:0007186	G-protein coupled receptor signaling pathway	biological_process	0.0067314	0.12523	11	259	218	12231	FBgn0262738,FBgn0261929,FBgn0085390,FBgn0025631,FBgn0259234,FBgn0004842,FBgn0038197,FBgn0052843,FBgn0260753,FBgn0023172,FBgn0038880
GO:0030239	myofibril assembly	biological_process	0.0067756	0.12581	4	259	36	12231	FBgn0264695,FBgn0025391,FBgn0265991,FBgn0265356
GO:0004222	metalloendopeptidase activity	molecular_function	0.0068964	0.12743	6	259	80	12231	FBgn0004885,FBgn0034903,FBgn0051619,FBgn0029791,FBgn0032252,FBgn0039277
GO:0048512	circadian behavior	biological_process	0.0069015	0.12743	6	259	80	12231	FBgn0038197,FBgn0263397,FBgn0266418,FBgn0000479,FBgn0260753,FBgn0001624
GO:0070161	anchoring junction	cellular_component	0.0069018	0.12743	6	259	80	12231	FBgn0259685,FBgn0085408,FBgn0028369,FBgn0000244,FBgn0033504,FBgn0265991
GO:0002118	aggressive behavior	biological_process	0.0069309	0.12772	5	259	57	12231	FBgn0010470,FBgn0000114,FBgn0005630,FBgn0261570,FBgn0003175
GO:0009880	embryonic pattern specification	biological_process	0.0069548	0.12776	11	259	219	12231	FBgn0004859,FBgn0041604,FBgn0085432,FBgn0003118,FBgn0261963,FBgn0041111,FBgn0004795,FBgn0003117,FBgn0001319,FBgn0001320,FBgn0262975
GO:0046579	positive regulation of Ras protein signal transduction	biological_process	0.0069718	0.12776	5	259	57	12231	FBgn0043070,FBgn0262562,FBgn0263706,FBgn0032388,FBgn0023172
GO:0051057	positive regulation of small GTPase mediated signal transduction	biological_process	0.0069718	0.12776	5	259	57	12231	FBgn0032388,FBgn0023172,FBgn0043070,FBgn0262562,FBgn0263706
GO:0035223	leg disc pattern formation	biological_process	0.0070449	0.12885	3	259	19	12231	FBgn0004635,FBgn0005677,FBgn0261963
GO:0051179	localization	biological_process	0.0071577	0.13067	58	259	2011	12231	FBgn0004606,FBgn0000182,FBgn0259145,FBgn0266098,FBgn0086901,FBgn0264908,FBgn0264695,FBgn0085408,FBgn0038837,FBgn0034247,FBgn0262738,FBgn0034911,FBgn0025391,FBgn0263111,FBgn0000244,FBgn0264693,FBgn0259822,FBgn0037387,FBgn0041111,FBgn0020307,FBgn0261260,FBgn0260964,FBgn0020299,FBgn0259111,FBgn0036732,FBgn0262975,FBgn0019968,FBgn0264442,FBgn0004885,FBgn0030872,FBgn0267727,FBgn0041092,FBgn0038975,FBg…
GO:0046530	photoreceptor cell differentiation	biological_process	0.0072232	0.13162	10	259	190	12231	FBgn0005630,FBgn0000413,FBgn0000210,FBgn0259685,FBgn0004449,FBgn0005677,FBgn0010575,FBgn0003118,FBgn0041111,FBgn0034070
GO:0071310	cellular response to organic substance	biological_process	0.0074712	0.13589	10	259	191	12231	FBgn0000448,FBgn0264490,FBgn0040271,FBgn0035849,FBgn0003117,FBgn0038197,FBgn0020299,FBgn0039932,FBgn0000210,FBgn0004914
GO:0007622	rhythmic behavior	biological_process	0.0077669	0.141	6	259	82	12231	FBgn0266418,FBgn0260753,FBgn0000479,FBgn0001624,FBgn0263397,FBgn0038197
GO:0022838	substrate-specific channel activity	molecular_function	0.0079244	0.1436	11	259	223	12231	FBgn0263111,FBgn0259145,FBgn0264908,FBgn0263397,FBgn0259822,FBgn0032593,FBgn0000036,FBgn0030707,FBgn0032151,FBgn0033494,FBgn0038837
GO:0003707	steroid hormone receptor activity	molecular_function	0.0081313	0.14707	3	259	20	12231	FBgn0000448,FBgn0035849,FBgn0004914
GO:0004714	transmembrane receptor protein tyrosine kinase activity	molecular_function	0.0081556	0.14711	3	259	20	12231	FBgn0025936,FBgn0053531,FBgn0010407
GO:0001751	compound eye photoreceptor cell differentiation	biological_process	0.0081635	0.14711	9	259	164	12231	FBgn0259685,FBgn0004449,FBgn0005677,FBgn0000210,FBgn0041111,FBgn0003118,FBgn0034070,FBgn0005630,FBgn0000413
GO:0070160	occluding junction	cellular_component	0.0082242	0.14793	4	259	38	12231	FBgn0259685,FBgn0001624,FBgn0025631,FBgn0085408
GO:0044705	multi-organism reproductive behavior	biological_process	0.0083049	0.14911	8	259	136	12231	FBgn0263111,FBgn0001624,FBgn0000479,FBgn0004795,FBgn0086675,FBgn0264815,FBgn0262477,FBgn0264607
GO:0042127	regulation of cell proliferation	biological_process	0.0084804	0.15198	9	259	165	12231	FBgn0038197,FBgn0045852,FBgn0028397,FBgn0001624,FBgn0001075,FBgn0259685,FBgn0013469,FBgn0085432,FBgn0003118
GO:0051780	behavioral response to nutrient	biological_process	0.008735	0.15512	2	259	7	12231	FBgn0003392,FBgn0263397
GO:0004112	cyclic-nucleotide phosphodiesterase activity	molecular_function	0.008735	0.15512	2	259	7	12231	FBgn0000479,FBgn0264815
GO:0004114	3',5'-cyclic-nucleotide phosphodiesterase activity	molecular_function	0.008735	0.15512	2	259	7	12231	FBgn0000479,FBgn0264815
GO:0015368	calcium:cation antiporter activity	molecular_function	0.008735	0.15512	2	259	7	12231	FBgn0028704,FBgn0013995
GO:0034704	calcium channel complex	cellular_component	0.008735	0.15512	2	259	7	12231	FBgn0259822,FBgn0263111
GO:0022604	regulation of cell morphogenesis	biological_process	0.0088052	0.15608	9	259	166	12231	FBgn0045852,FBgn0086901,FBgn0264272,FBgn0001319,FBgn0039704,FBgn0023172,FBgn0029157,FBgn0052666,FBgn0004449
GO:0004713	protein tyrosine kinase activity	molecular_function	0.0089955	0.15869	4	259	39	12231	FBgn0025936,FBgn0053531,FBgn0033791,FBgn0010407
GO:0048865	stem cell fate commitment	biological_process	0.0089977	0.15869	4	259	39	12231	FBgn0261963,FBgn0004878,FBgn0004635,FBgn0045852
GO:0042386	hemocyte differentiation	biological_process	0.0090152	0.15869	4	259	39	12231	FBgn0004606,FBgn0085432,FBgn0003118,FBgn0001319
GO:0019098	reproductive behavior	biological_process	0.0090335	0.15869	8	259	138	12231	FBgn0264815,FBgn0086675,FBgn0264607,FBgn0262477,FBgn0001624,FBgn0000479,FBgn0263111,FBgn0004795
GO:0030054	cell junction	cellular_component	0.0090338	0.15869	8	259	138	12231	FBgn0028369,FBgn0085408,FBgn0265991,FBgn0025631,FBgn0259685,FBgn0000244,FBgn0001624,FBgn0033504
GO:0038023	signaling receptor activity	molecular_function	0.00906	0.15887	16	259	391	12231	FBgn0010407,FBgn0004842,FBgn0025936,FBgn0053531,FBgn0038837,FBgn0035849,FBgn0260753,FBgn0052843,FBgn0000448,FBgn0038880,FBgn0261929,FBgn0004914,FBgn0030707,FBgn0000036,FBgn0025631,FBgn0262869
GO:0007612	learning	biological_process	0.0092045	0.16111	6	259	85	12231	FBgn0003392,FBgn0262477,FBgn0004635,FBgn0266098,FBgn0038975,FBgn0000479
GO:0005230	extracellular ligand-gated ion channel activity	molecular_function	0.0092398	0.16134	5	259	61	12231	FBgn0032151,FBgn0264908,FBgn0038837,FBgn0000036,FBgn0030707
GO:0046552	photoreceptor cell fate commitment	biological_process	0.0092662	0.16134	5	259	61	12231	FBgn0000210,FBgn0005630,FBgn0005677,FBgn0000413,FBgn0003118
GO:0045475	locomotor rhythm	biological_process	0.0092671	0.16134	5	259	61	12231	FBgn0260753,FBgn0001624,FBgn0000479,FBgn0263397,FBgn0038197
GO:0048665	neuron fate specification	biological_process	0.0093836	0.16193	3	259	21	12231	FBgn0005677,FBgn0261963,FBgn0000413
GO:0045467	R7 cell development	biological_process	0.009398	0.16193	3	259	21	12231	FBgn0004449,FBgn0005630,FBgn0003118
GO:0007614	short-term memory	biological_process	0.0094003	0.16193	3	259	21	12231	FBgn0000479,FBgn0266098,FBgn0003392
GO:0046580	negative regulation of Ras protein signal transduction	biological_process	0.0094003	0.16193	3	259	21	12231	FBgn0013469,FBgn0086901,FBgn0261570
GO:0051058	negative regulation of small GTPase mediated signal transduction	biological_process	0.0094003	0.16193	3	259	21	12231	FBgn0261570,FBgn0086901,FBgn0013469
GO:0042493	response to drug	biological_process	0.0094003	0.16193	3	259	21	12231	FBgn0260964,FBgn0261451,FBgn0259170
GO:0001754	eye photoreceptor cell differentiation	biological_process	0.0094847	0.16309	9	259	168	12231	FBgn0000413,FBgn0005630,FBgn0034070,FBgn0003118,FBgn0041111,FBgn0005677,FBgn0004449,FBgn0259685,FBgn0000210
GO:0015267	channel activity	molecular_function	0.010488	0.17971	11	259	232	12231	FBgn0263111,FBgn0259145,FBgn0264908,FBgn0263397,FBgn0259822,FBgn0032593,FBgn0000036,FBgn0030707,FBgn0032151,FBgn0038837,FBgn0033494
GO:0022803	passive transmembrane transporter activity	molecular_function	0.010488	0.17971	11	259	232	12231	FBgn0259822,FBgn0264908,FBgn0263397,FBgn0032593,FBgn0263111,FBgn0259145,FBgn0032151,FBgn0033494,FBgn0038837,FBgn0000036,FBgn0030707
GO:1902531	regulation of intracellular signal transduction	biological_process	0.01055	0.18046	12	259	264	12231	FBgn0262562,FBgn0261570,FBgn0259685,FBgn0013469,FBgn0086901,FBgn0263706,FBgn0001319,FBgn0043070,FBgn0264707,FBgn0032388,FBgn0000479,FBgn0023172
GO:0022607	cellular component assembly	biological_process	0.010673	0.18183	29	259	875	12231	FBgn0004587,FBgn0014343,FBgn0264272,FBgn0083975,FBgn0267727,FBgn0011817,FBgn0038975,FBgn0262975,FBgn0003392,FBgn0264695,FBgn0032252,FBgn0038826,FBgn0265356,FBgn0264693,FBgn0001624,FBgn0052082,FBgn0029157,FBgn0025391,FBgn0263111,FBgn0034636,FBgn0264607,FBgn0004449,FBgn0259685,FBgn0025631,FBgn0265991,FBgn0040752,FBgn0039709,FBgn0041111,FBgn0028369
GO:0035050	embryonic heart tube development	biological_process	0.010699	0.18183	3	259	22	12231	FBgn0261963,FBgn0003117,FBgn0264089
GO:0005244	voltage-gated ion channel activity	molecular_function	0.010736	0.18183	4	259	41	12231	FBgn0263111,FBgn0033494,FBgn0259822,FBgn0263397
GO:0022832	voltage-gated channel activity	molecular_function	0.010736	0.18183	4	259	41	12231	FBgn0263111,FBgn0033494,FBgn0259822,FBgn0263397
GO:0001894	tissue homeostasis	biological_process	0.010736	0.18183	4	259	41	12231	FBgn0262738,FBgn0259685,FBgn0086901,FBgn0004635
GO:0016203	muscle attachment	biological_process	0.010742	0.18183	4	259	41	12231	FBgn0033504,FBgn0003499,FBgn0264442,FBgn0001319
GO:0010033	response to organic substance	biological_process	0.010938	0.18483	15	259	365	12231	FBgn0000210,FBgn0004914,FBgn0039932,FBgn0028990,FBgn0025631,FBgn0020299,FBgn0035849,FBgn0038197,FBgn0004635,FBgn0003117,FBgn0000024,FBgn0000479,FBgn0264490,FBgn0000448,FBgn0040271
GO:0002164	larval development	biological_process	0.011074	0.18681	7	259	115	12231	FBgn0004635,FBgn0001319,FBgn0038197,FBgn0032252,FBgn0028369,FBgn0001624,FBgn0082585
GO:0007350	blastoderm segmentation	biological_process	0.011206	0.1887	10	259	203	12231	FBgn0001319,FBgn0003117,FBgn0262975,FBgn0001320,FBgn0004859,FBgn0003118,FBgn0261963,FBgn0041111,FBgn0085432,FBgn0041604
GO:0044237	cellular metabolic process	biological_process	0.011293	0.18984	102	259	3983	12231	FBgn0264001,FBgn0085432,FBgn0259099,FBgn0005677,FBgn0264707,FBgn0000182,FBgn0031903,FBgn0010407,FBgn0259234,FBgn0000179,FBgn0014343,FBgn0053531,FBgn0011481,FBgn0041111,FBgn0020307,FBgn0030738,FBgn0000114,FBgn0004914,FBgn0260397,FBgn0000448,FBgn0013531,FBgn0029157,FBgn0033791,FBgn0035849,FBgn0000497,FBgn0010575,FBgn0261963,FBgn0041092,FBgn0000559,FBgn0030558,FBgn0262139,FBgn0005630,FBgn0005624,FBg…
GO:0016010	dystrophin-associated glycoprotein complex	cellular_component	0.011455	0.19045	2	259	8	12231	FBgn0025391,FBgn0260003
GO:0006941	striated muscle contraction	biological_process	0.011467	0.19045	2	259	8	12231	FBgn0033494,FBgn0265356
GO:0007319	negative regulation of oskar mRNA translation	biological_process	0.01148	0.19045	2	259	8	12231	FBgn0000114,FBgn0000182
GO:0036099	female germ-line stem cell population maintenance	biological_process	0.01148	0.19045	2	259	8	12231	FBgn0038197,FBgn0000114
GO:0048168	regulation of neuronal synaptic plasticity	biological_process	0.011485	0.19045	2	259	8	12231	FBgn0260003,FBgn0003392
GO:0045938	positive regulation of circadian sleep/wake cycle, sleep	biological_process	0.011485	0.19045	2	259	8	12231	FBgn0266418,FBgn0263397
GO:0035090	maintenance of apical/basal cell polarity	biological_process	0.011485	0.19045	2	259	8	12231	FBgn0261451,FBgn0259685
GO:0045296	cadherin binding	molecular_function	0.011485	0.19045	2	259	8	12231	FBgn0000497,FBgn0001075
GO:0014016	neuroblast differentiation	biological_process	0.011665	0.1931	4	259	42	12231	FBgn0004878,FBgn0261963,FBgn0013469,FBgn0045852
GO:0007416	synapse assembly	biological_process	0.011964	0.19737	8	259	145	12231	FBgn0040752,FBgn0004449,FBgn0264607,FBgn0263111,FBgn0083975,FBgn0038975,FBgn0011817,FBgn0001624
GO:0007528	neuromuscular junction development	biological_process	0.011964	0.19737	8	259	145	12231	FBgn0004449,FBgn0264607,FBgn0041604,FBgn0266098,FBgn0263111,FBgn0001624,FBgn0038975,FBgn0011817
GO:0032870	cellular response to hormone stimulus	biological_process	0.011989	0.19737	5	259	65	12231	FBgn0000448,FBgn0264490,FBgn0035849,FBgn0004914,FBgn0038197
GO:0045216	cell-cell junction organization	biological_process	0.012023	0.19737	5	259	65	12231	FBgn0259685,FBgn0003392,FBgn0028369,FBgn0025631,FBgn0001624
GO:0008285	negative regulation of cell proliferation	biological_process	0.012023	0.19737	5	259	65	12231	FBgn0001624,FBgn0001075,FBgn0038197,FBgn0045852,FBgn0028397
GO:0045887	positive regulation of synaptic growth at neuromuscular junction	biological_process	0.012135	0.19799	3	259	23	12231	FBgn0263111,FBgn0011817,FBgn0001624
GO:1904398	positive regulation of neuromuscular junction development	biological_process	0.012135	0.19799	3	259	23	12231	FBgn0263111,FBgn0011817,FBgn0001624
GO:0007601	visual perception	biological_process	0.012135	0.19799	3	259	23	12231	FBgn0263111,FBgn0041604,FBgn0032593
GO:0009952	anterior/posterior pattern specification	biological_process	0.012142	0.19799	9	259	175	12231	FBgn0004360,FBgn0004859,FBgn0041111,FBgn0003118,FBgn0004795,FBgn0031903,FBgn0000179,FBgn0001320,FBgn0262975
GO:0030866	cortical actin cytoskeleton organization	biological_process	0.012668	0.20621	4	259	43	12231	FBgn0025631,FBgn0041111,FBgn0003392,FBgn0086901
GO:0031032	actomyosin structure organization	biological_process	0.012782	0.20751	5	259	66	12231	FBgn0265991,FBgn0265356,FBgn0264695,FBgn0041111,FBgn0025391
GO:0034330	cell junction organization	biological_process	0.01279	0.20751	5	259	66	12231	FBgn0028369,FBgn0001624,FBgn0025631,FBgn0259685,FBgn0003392
GO:1902589	single-organism organelle organization	biological_process	0.012997	0.21051	35	259	1124	12231	FBgn0019968,FBgn0262975,FBgn0267727,FBgn0000559,FBgn0025639,FBgn0038197,FBgn0261573,FBgn0003392,FBgn0001320,FBgn0023172,FBgn0052082,FBgn0001624,FBgn0025631,FBgn0011826,FBgn0000182,FBgn0016694,FBgn0086901,FBgn0264272,FBgn0004587,FBgn0015600,FBgn0264695,FBgn0085408,FBgn0001075,FBgn0000244,FBgn0025391,FBgn0029157,FBgn0001139,FBgn0264693,FBgn0265356,FBgn0000497,FBgn0041111,FBgn0040752,FBgn0265991,FBg…
GO:0015276	ligand-gated ion channel activity	molecular_function	0.01318	0.21277	7	259	119	12231	FBgn0030707,FBgn0259145,FBgn0000036,FBgn0038837,FBgn0032151,FBgn0264908,FBgn0263397
GO:0022834	ligand-gated channel activity	molecular_function	0.01318	0.21277	7	259	119	12231	FBgn0259145,FBgn0030707,FBgn0000036,FBgn0038837,FBgn0264908,FBgn0032151,FBgn0263397
GO:0009725	response to hormone	biological_process	0.013553	0.21808	5	259	67	12231	FBgn0000448,FBgn0264490,FBgn0038197,FBgn0004914,FBgn0035849
GO:0010975	regulation of neuron projection development	biological_process	0.01359	0.21808	5	259	67	12231	FBgn0045852,FBgn0086901,FBgn0001319,FBgn0023172,FBgn0029157
GO:0003714	transcription corepressor activity	molecular_function	0.013641	0.21808	3	259	24	12231	FBgn0010575,FBgn0261573,FBgn0001139
GO:0006936	muscle contraction	biological_process	0.013645	0.21808	3	259	24	12231	FBgn0265356,FBgn0264695,FBgn0033494
GO:0046058	cAMP metabolic process	biological_process	0.013654	0.21808	3	259	24	12231	FBgn0264815,FBgn0260753,FBgn0038197
GO:0017085	response to insecticide	biological_process	0.013655	0.21808	3	259	24	12231	FBgn0000036,FBgn0032151,FBgn0000024
GO:0008188	neuropeptide receptor activity	molecular_function	0.01367	0.21808	4	259	44	12231	FBgn0004842,FBgn0260753,FBgn0052843,FBgn0038880
GO:1903530	regulation of secretion by cell	biological_process	0.013687	0.21808	4	259	44	12231	FBgn0263397,FBgn0260003,FBgn0023091,FBgn0263111
GO:0007635	chemosensory behavior	biological_process	0.013753	0.21877	7	259	120	12231	FBgn0266098,FBgn0263397,FBgn0004635,FBgn0003392,FBgn0041111,FBgn0016926,FBgn0000479
GO:0033057	multicellular organismal reproductive behavior	biological_process	0.013777	0.2188	7	259	120	12231	FBgn0264607,FBgn0004795,FBgn0262477,FBgn0001624,FBgn0264815,FBgn0086675,FBgn0263111
GO:0002376	immune system process	biological_process	0.014052	0.2228	15	259	376	12231	FBgn0264707,FBgn0004606,FBgn0267727,FBgn0001319,FBgn0038197,FBgn0003117,FBgn0025936,FBgn0005630,FBgn0003118,FBgn0034070,FBgn0085432,FBgn0028990,FBgn0259099,FBgn0262738,FBgn0259170
GO:0032504	multicellular organism reproduction	biological_process	0.014182	0.2245	35	259	1131	12231	FBgn0023172,FBgn0001624,FBgn0022770,FBgn0039709,FBgn0264815,FBgn0000210,FBgn0264607,FBgn0259685,FBgn0267727,FBgn0041092,FBgn0264442,FBgn0000413,FBgn0262975,FBgn0005630,FBgn0004635,FBgn0261963,FBgn0003118,FBgn0003392,FBgn0263111,FBgn0038826,FBgn0029881,FBgn0020299,FBgn0086675,FBgn0000114,FBgn0004859,FBgn0260397,FBgn0000479,FBgn0000182,FBgn0004606,FBgn0004795,FBgn0014343,FBgn0015600,FBgn0264695,FBg…
GO:0035556	intracellular signal transduction	biological_process	0.014375	0.22468	19	259	519	12231	FBgn0085390,FBgn0261570,FBgn0259685,FBgn0013469,FBgn0023172,FBgn0043070,FBgn0003118,FBgn0262562,FBgn0001075,FBgn0262738,FBgn0259099,FBgn0263980,FBgn0264707,FBgn0032388,FBgn0000479,FBgn0259145,FBgn0263706,FBgn0001319,FBgn0086901
GO:0051049	regulation of transport	biological_process	0.014416	0.22468	9	259	180	12231	FBgn0259685,FBgn0041111,FBgn0037766,FBgn0261260,FBgn0023091,FBgn0263397,FBgn0260003,FBgn0263111,FBgn0038975
GO:0046845	branched duct epithelial cell fate determination, open tracheal system	biological_process	0.014417	0.22468	2	259	9	12231	FBgn0004635,FBgn0001320
GO:0007402	ganglion mother cell fate determination	biological_process	0.014513	0.22468	2	259	9	12231	FBgn0261963,FBgn0004878
GO:0051890	regulation of cardioblast differentiation	biological_process	0.01452	0.22468	2	259	9	12231	FBgn0261963,FBgn0003118
GO:0008150	biological_process	biological_process	0.01455	0.22468	242	259	10930	12231	FBgn0000244,FBgn0000448,FBgn0031530,FBgn0038126,FBgn0000497,FBgn0033791,FBgn0035849,FBgn0028481,FBgn0020307,FBgn0262869,FBgn0051163,FBgn0041111,FBgn0040752,FBgn0034903,FBgn0260397,FBgn0004449,FBgn0259111,FBgn0000114,FBgn0263873,FBgn0030738,FBgn0023407,FBgn0264707,FBgn0028645,FBgn0083975,FBgn0039704,FBgn0014343,FBgn0265296,FBgn0264272,FBgn0259234,FBgn0010407,FBgn0026189,FBgn0031903,FBgn0003175,FBg…
GO:0004707	MAP kinase activity	molecular_function	0.014558	0.22468	2	259	9	12231	FBgn0011817,FBgn0033915
GO:0061320	pericardial nephrocyte differentiation	biological_process	0.01456	0.22468	2	259	9	12231	FBgn0003117,FBgn0003118
GO:0048580	regulation of post-embryonic development	biological_process	0.014562	0.22468	2	259	9	12231	FBgn0038197,FBgn0001319
GO:0016204	determination of muscle attachment site	biological_process	0.014562	0.22468	2	259	9	12231	FBgn0003499,FBgn0001319
GO:0072347	response to anesthetic	biological_process	0.014562	0.22468	2	259	9	12231	FBgn0261451,FBgn0259170
GO:0030864	cortical actin cytoskeleton	cellular_component	0.014562	0.22468	2	259	9	12231	FBgn0085408,FBgn0023172
GO:0005217	intracellular ligand-gated ion channel activity	molecular_function	0.014562	0.22468	2	259	9	12231	FBgn0263397,FBgn0259145
GO:0005245	voltage-gated calcium channel activity	molecular_function	0.014562	0.22468	2	259	9	12231	FBgn0259822,FBgn0263111
GO:0015696	ammonium transport	biological_process	0.014562	0.22468	2	259	9	12231	FBgn0263397,FBgn0260964
GO:0042753	positive regulation of circadian rhythm	biological_process	0.014562	0.22468	2	259	9	12231	FBgn0266418,FBgn0263397
GO:0007422	peripheral nervous system development	biological_process	0.014662	0.22587	6	259	94	12231	FBgn0004635,FBgn0025936,FBgn0014343,FBgn0000108,FBgn0003118,FBgn0000413
GO:0030016	myofibril	cellular_component	0.014791	0.22615	4	259	45	12231	FBgn0025391,FBgn0264695,FBgn0265356,FBgn0265991
GO:0035215	genital disc development	biological_process	0.014796	0.22615	4	259	45	12231	FBgn0003118,FBgn0005677,FBgn0004635,FBgn0004859
GO:0042058	regulation of epidermal growth factor receptor signaling pathway	biological_process	0.014796	0.22615	4	259	45	12231	FBgn0041723,FBgn0004635,FBgn0029791,FBgn0040271
GO:1901184	regulation of ERBB signaling pathway	biological_process	0.014796	0.22615	4	259	45	12231	FBgn0040271,FBgn0029791,FBgn0004635,FBgn0041723
GO:0048871	multicellular organismal homeostasis	biological_process	0.014796	0.22615	4	259	45	12231	FBgn0259685,FBgn0086901,FBgn0004635,FBgn0262738
GO:0046873	metal ion transmembrane transporter activity	molecular_function	0.014844	0.22654	10	259	212	12231	FBgn0259822,FBgn0263397,FBgn0013995,FBgn0032593,FBgn0028704,FBgn0263111,FBgn0259111,FBgn0033494,FBgn0034911,FBgn0038652
GO:0048638	regulation of developmental growth	biological_process	0.01491	0.22719	9	259	181	12231	FBgn0264607,FBgn0259685,FBgn0001075,FBgn0010575,FBgn0041604,FBgn0038197,FBgn0001624,FBgn0011817,FBgn0263111
GO:0016331	morphogenesis of embryonic epithelium	biological_process	0.014977	0.22786	7	259	122	12231	FBgn0000633,FBgn0000299,FBgn0259685,FBgn0086901,FBgn0003117,FBgn0001624,FBgn0023172
GO:0019199	transmembrane receptor protein kinase activity	molecular_function	0.015239	0.23065	3	259	25	12231	FBgn0010407,FBgn0053531,FBgn0025936
GO:0035282	segmentation	biological_process	0.01526	0.23065	11	259	245	12231	FBgn0003117,FBgn0001319,FBgn0001320,FBgn0262975,FBgn0004859,FBgn0041604,FBgn0085432,FBgn0020307,FBgn0261963,FBgn0003118,FBgn0041111
GO:0042749	regulation of circadian sleep/wake cycle	biological_process	0.015278	0.23065	3	259	25	12231	FBgn0263397,FBgn0266418,FBgn0260753
GO:0045610	regulation of hemocyte differentiation	biological_process	0.015279	0.23065	3	259	25	12231	FBgn0001319,FBgn0085432,FBgn0003118
GO:0019932	second-messenger-mediated signaling	biological_process	0.015279	0.23065	3	259	25	12231	FBgn0259145,FBgn0000479,FBgn0262738
GO:0098797	plasma membrane protein complex	cellular_component	0.015398	0.23208	9	259	182	12231	FBgn0264908,FBgn0260003,FBgn0259822,FBgn0025391,FBgn0263111,FBgn0262738,FBgn0032151,FBgn0033494,FBgn0000036
GO:0035006	melanization defense response	biological_process	0.015897	0.23893	4	259	46	12231	FBgn0028990,FBgn0264707,FBgn0259099,FBgn0025936
GO:0044449	contractile fiber part	cellular_component	0.015937	0.23893	4	259	46	12231	FBgn0025391,FBgn0264695,FBgn0265991,FBgn0265356
GO:0048190	wing disc dorsal/ventral pattern formation	biological_process	0.01595	0.23893	4	259	46	12231	FBgn0041604,FBgn0010575,FBgn0003118,FBgn0041111
GO:0007631	feeding behavior	biological_process	0.01595	0.23893	4	259	46	12231	FBgn0000479,FBgn0003392,FBgn0013469,FBgn0038197
GO:0002252	immune effector process	biological_process	0.016864	0.25224	6	259	97	12231	FBgn0259170,FBgn0259099,FBgn0003117,FBgn0025936,FBgn0028990,FBgn0264707
GO:0051965	positive regulation of synapse assembly	biological_process	0.017007	0.25322	3	259	26	12231	FBgn0001624,FBgn0011817,FBgn0263111
GO:0050953	sensory perception of light stimulus	biological_process	0.017007	0.25322	3	259	26	12231	FBgn0263111,FBgn0041604,FBgn0032593
GO:0005262	calcium channel activity	molecular_function	0.017007	0.25322	3	259	26	12231	FBgn0032593,FBgn0259822,FBgn0263111
GO:0008528	G-protein coupled peptide receptor activity	molecular_function	0.017106	0.25381	4	259	47	12231	FBgn0052843,FBgn0260753,FBgn0038880,FBgn0004842
GO:0043292	contractile fiber	cellular_component	0.017138	0.25381	4	259	47	12231	FBgn0265991,FBgn0265356,FBgn0264695,FBgn0025391
GO:0007043	cell-cell junction assembly	biological_process	0.017151	0.25381	4	259	47	12231	FBgn0001624,FBgn0025631,FBgn0028369,FBgn0259685
GO:0019900	kinase binding	molecular_function	0.017151	0.25381	4	259	47	12231	FBgn0259685,FBgn0038197,FBgn0015600,FBgn0085432
GO:0035225	determination of genital disc primordium	biological_process	0.017928	0.26444	2	259	10	12231	FBgn0003118,FBgn0004635
GO:0004889	acetylcholine-activated cation-selective channel activity	molecular_function	0.01795	0.26444	2	259	10	12231	FBgn0032151,FBgn0000036
GO:0005892	acetylcholine-gated channel complex	cellular_component	0.01795	0.26444	2	259	10	12231	FBgn0000036,FBgn0032151
GO:0051046	regulation of secretion	biological_process	0.018381	0.26638	4	259	48	12231	FBgn0263111,FBgn0023091,FBgn0260003,FBgn0263397
GO:0009187	cyclic nucleotide metabolic process	biological_process	0.018407	0.26638	4	259	48	12231	FBgn0038197,FBgn0264815,FBgn0000479,FBgn0260753
GO:0030865	cortical cytoskeleton organization	biological_process	0.018407	0.26638	4	259	48	12231	FBgn0086901,FBgn0003392,FBgn0041111,FBgn0025631
GO:0008593	regulation of Notch signaling pathway	biological_process	0.018426	0.26638	6	259	99	12231	FBgn0010470,FBgn0003392,FBgn0260397,FBgn0259685,FBgn0029881,FBgn0261573
GO:0001708	cell fate specification	biological_process	0.018496	0.26638	6	259	99	12231	FBgn0001319,FBgn0005677,FBgn0004635,FBgn0261963,FBgn0003118,FBgn0000413
GO:0015297	antiporter activity	molecular_function	0.01884	0.26638	3	259	27	12231	FBgn0259111,FBgn0028704,FBgn0013995
GO:0001653	peptide receptor activity	molecular_function	0.01967	0.26638	4	259	49	12231	FBgn0260753,FBgn0052843,FBgn0038880,FBgn0004842
GO:0008306	associative learning	biological_process	0.020135	0.26638	5	259	74	12231	FBgn0038975,FBgn0000479,FBgn0003392,FBgn0004635,FBgn0266098
GO:0097305	response to alcohol	biological_process	0.020182	0.26638	6	259	101	12231	FBgn0264490,FBgn0028990,FBgn0000479,FBgn0025631,FBgn0004635,FBgn0000210
GO:0002213	defense response to insect	biological_process	0.020184	0.26638	1	259	1	12231	FBgn0028990
GO:0009625	response to insect	biological_process	0.020184	0.26638	1	259	1	12231	FBgn0028990
GO:0004838	L-tyrosine:2-oxoglutarate aminotransferase activity	molecular_function	0.0206	0.26638	1	259	1	12231	FBgn0030558
GO:0070547	L-tyrosine aminotransferase activity	molecular_function	0.0206	0.26638	1	259	1	12231	FBgn0030558
GO:0000390	spliceosomal complex disassembly	biological_process	0.020606	0.26638	1	259	1	12231	FBgn0032194
GO:0032988	ribonucleoprotein complex disassembly	biological_process	0.020606	0.26638	1	259	1	12231	FBgn0032194
GO:0000293	ferric-chelate reductase activity	molecular_function	0.020695	0.26638	1	259	1	12231	FBgn0034067
GO:0042745	circadian sleep/wake cycle	biological_process	0.020777	0.26638	3	259	28	12231	FBgn0263397,FBgn0266418,FBgn0260753
GO:0048814	regulation of dendrite morphogenesis	biological_process	0.020778	0.26638	3	259	28	12231	FBgn0045852,FBgn0086901,FBgn0001319
GO:0016318	ommatidial rotation	biological_process	0.020778	0.26638	3	259	28	12231	FBgn0000497,FBgn0001075,FBgn0011817
GO:0001707	mesoderm formation	biological_process	0.020778	0.26638	3	259	28	12231	FBgn0020299,FBgn0085432,FBgn0264089
GO:0046667	compound eye retinal cell programmed cell death	biological_process	0.020778	0.26638	3	259	28	12231	FBgn0003392,FBgn0262738,FBgn0013469
GO:0001222	transcription corepressor binding	molecular_function	0.020879	0.26638	1	259	1	12231	FBgn0261963
GO:0001226	RNA polymerase II transcription corepressor binding	molecular_function	0.020879	0.26638	1	259	1	12231	FBgn0261963
GO:0007221	positive regulation of transcription of Notch receptor target	biological_process	0.02098	0.26638	1	259	1	12231	FBgn0261573
GO:0090241	negative regulation of histone H4 acetylation	biological_process	0.02098	0.26638	1	259	1	12231	FBgn0261573
GO:2000619	negative regulation of histone H4-K16 acetylation	biological_process	0.02098	0.26638	1	259	1	12231	FBgn0261573
GO:0008270	zinc ion binding	molecular_function	0.020988	0.26638	22	259	653	12231	FBgn0003117,FBgn0260003,FBgn0027844,FBgn0250819,FBgn0001138,FBgn0032252,FBgn0035849,FBgn0001320,FBgn0265356,FBgn0052369,FBgn0000448,FBgn0004914,FBgn0265991,FBgn0039920,FBgn0005636,FBgn0005624,FBgn0051619,FBgn0004885,FBgn0263974,FBgn0050147,FBgn0029791,FBgn0263772
GO:0038005	peptide bond cleavage involved in epidermal growth factor receptor ligand maturation	biological_process	0.021029	0.26638	1	259	1	12231	FBgn0004635
GO:0070410	co-SMAD binding	molecular_function	0.021034	0.26638	1	259	1	12231	FBgn0039932
GO:1901201	regulation of extracellular matrix assembly	biological_process	0.021061	0.26638	1	259	1	12231	FBgn0032252
GO:1901203	positive regulation of extracellular matrix assembly	biological_process	0.021061	0.26638	1	259	1	12231	FBgn0032252
GO:0042752	regulation of circadian rhythm	biological_process	0.021088	0.26638	4	259	50	12231	FBgn0262738,FBgn0263397,FBgn0260753,FBgn0266418
GO:0046620	regulation of organ growth	biological_process	0.021089	0.26638	4	259	50	12231	FBgn0259685,FBgn0001075,FBgn0010575,FBgn0041604
GO:0007391	dorsal closure	biological_process	0.021125	0.26638	6	259	102	12231	FBgn0001624,FBgn0003117,FBgn0259685,FBgn0086901,FBgn0000633,FBgn0000299
GO:0008502	melatonin receptor activity	molecular_function	0.021152	0.26638	1	259	1	12231	FBgn0025631
GO:0071837	HMG box domain binding	molecular_function	0.021155	0.26638	1	259	1	12231	FBgn0001139
GO:0035291	specification of segmental identity, intercalary segment	biological_process	0.021163	0.26638	1	259	1	12231	FBgn0001319
GO:0002119	nematode larval development	biological_process	0.021164	0.26638	1	259	1	12231	FBgn0038197
GO:0040025	vulval development	biological_process	0.021164	0.26638	1	259	1	12231	FBgn0038197
GO:0040027	negative regulation of vulval development	biological_process	0.021164	0.26638	1	259	1	12231	FBgn0038197
GO:0040028	regulation of vulval development	biological_process	0.021164	0.26638	1	259	1	12231	FBgn0038197
GO:0061062	regulation of nematode larval development	biological_process	0.021164	0.26638	1	259	1	12231	FBgn0038197
GO:0061064	negative regulation of nematode larval development	biological_process	0.021164	0.26638	1	259	1	12231	FBgn0038197
GO:2000125	regulation of octopamine or tyramine signaling pathway	biological_process	0.021164	0.26638	1	259	1	12231	FBgn0038197
GO:2000127	positive regulation of octopamine or tyramine signaling pathway	biological_process	0.021164	0.26638	1	259	1	12231	FBgn0038197
GO:2000128	regulation of octopamine signaling pathway	biological_process	0.021164	0.26638	1	259	1	12231	FBgn0038197
GO:2000130	positive regulation of octopamine signaling pathway	biological_process	0.021164	0.26638	1	259	1	12231	FBgn0038197
GO:0048499	synaptic vesicle membrane organization	biological_process	0.021164	0.26638	1	259	1	12231	FBgn0003392
GO:0090148	membrane fission	biological_process	0.021164	0.26638	1	259	1	12231	FBgn0003392
GO:0014732	skeletal muscle atrophy	biological_process	0.021164	0.26638	1	259	1	12231	FBgn0260660
GO:0014887	cardiac muscle adaptation	biological_process	0.021164	0.26638	1	259	1	12231	FBgn0260660
GO:0014888	striated muscle adaptation	biological_process	0.021164	0.26638	1	259	1	12231	FBgn0260660
GO:0014889	muscle atrophy	biological_process	0.021164	0.26638	1	259	1	12231	FBgn0260660
GO:0014891	striated muscle atrophy	biological_process	0.021164	0.26638	1	259	1	12231	FBgn0260660
GO:0014899	cardiac muscle atrophy	biological_process	0.021164	0.26638	1	259	1	12231	FBgn0260660
GO:0043500	muscle adaptation	biological_process	0.021164	0.26638	1	259	1	12231	FBgn0260660
GO:0043501	skeletal muscle adaptation	biological_process	0.021164	0.26638	1	259	1	12231	FBgn0260660
GO:2001044	regulation of integrin-mediated signaling pathway	biological_process	0.021164	0.26638	1	259	1	12231	FBgn0260660
GO:2001046	positive regulation of integrin-mediated signaling pathway	biological_process	0.021164	0.26638	1	259	1	12231	FBgn0260660
GO:0008510	sodium:bicarbonate symporter activity	molecular_function	0.021164	0.26638	1	259	1	12231	FBgn0259111
GO:0032438	melanosome organization	biological_process	0.021164	0.26638	1	259	1	12231	FBgn0085408
GO:0042313	protein kinase C deactivation	biological_process	0.021164	0.26638	1	259	1	12231	FBgn0085390
GO:0001507	acetylcholine catabolic process in synaptic cleft	biological_process	0.021164	0.26638	1	259	1	12231	FBgn0000024
GO:0003990	acetylcholinesterase activity	molecular_function	0.021164	0.26638	1	259	1	12231	FBgn0000024
GO:0004117	calmodulin-dependent cyclic-nucleotide phosphodiesterase activity	molecular_function	0.021164	0.26638	1	259	1	12231	FBgn0264815
GO:0005003	ephrin receptor activity	molecular_function	0.021164	0.26638	1	259	1	12231	FBgn0025936
GO:0005294	neutral L-amino acid secondary active transmembrane transporter activity	molecular_function	0.021164	0.26638	1	259	1	12231	FBgn0034911
GO:0005430	synaptic vesicle amine transmembrane transporter activity	molecular_function	0.021164	0.26638	1	259	1	12231	FBgn0260964
GO:0006581	acetylcholine catabolic process	biological_process	0.021164	0.26638	1	259	1	12231	FBgn0000024
GO:0008330	protein tyrosine/threonine phosphatase activity	molecular_function	0.021164	0.26638	1	259	1	12231	FBgn0029157
GO:0008331	high voltage-gated calcium channel activity	molecular_function	0.021164	0.26638	1	259	1	12231	FBgn0263111
GO:0008628	hormone-mediated apoptotic signaling pathway	biological_process	0.021164	0.26638	1	259	1	12231	FBgn0264490
GO:0014046	dopamine secretion	biological_process	0.021164	0.26638	1	259	1	12231	FBgn0263397
GO:0014059	regulation of dopamine secretion	biological_process	0.021164	0.26638	1	259	1	12231	FBgn0263397
GO:0015375	glycine:sodium symporter activity	molecular_function	0.021164	0.26638	1	259	1	12231	FBgn0034911
GO:0015816	glycine transport	biological_process	0.021164	0.26638	1	259	1	12231	FBgn0034911
GO:0015842	synaptic vesicle amine transport	biological_process	0.021164	0.26638	1	259	1	12231	FBgn0260964
GO:0016167	glial cell-derived neurotrophic factor receptor activity	molecular_function	0.021164	0.26638	1	259	1	12231	FBgn0262869
GO:0017166	vinculin binding	molecular_function	0.021164	0.26638	1	259	1	12231	FBgn0033504
GO:0018741	alkyl sulfatase activity	molecular_function	0.021164	0.26638	1	259	1	12231	FBgn0040271
GO:0019695	choline metabolic process	biological_process	0.021164	0.26638	1	259	1	12231	FBgn0000024
GO:0030160	GKAP/Homer scaffold activity	molecular_function	0.021164	0.26638	1	259	1	12231	FBgn0040752
GO:0030478	actin cap	cellular_component	0.021164	0.26638	1	259	1	12231	FBgn0023172
GO:0030710	regulation of border follicle cell delamination	biological_process	0.021164	0.26638	1	259	1	12231	FBgn0001624
GO:0030858	positive regulation of epithelial cell differentiation	biological_process	0.021164	0.26638	1	259	1	12231	FBgn0004859
GO:0031005	filamin binding	molecular_function	0.021164	0.26638	1	259	1	12231	FBgn0004449
GO:0031362	anchored component of external side of plasma membrane	cellular_component	0.021164	0.26638	1	259	1	12231	FBgn0262869
GO:0032530	regulation of microvillus organization	biological_process	0.021164	0.26638	1	259	1	12231	FBgn0039709
GO:0032531	regulation of follicle cell microvillus organization	biological_process	0.021164	0.26638	1	259	1	12231	FBgn0039709
GO:0032532	regulation of microvillus length	biological_process	0.021164	0.26638	1	259	1	12231	FBgn0039709
GO:0032533	regulation of follicle cell microvillus length	biological_process	0.021164	0.26638	1	259	1	12231	FBgn0039709
GO:0032536	regulation of cell projection size	biological_process	0.021164	0.26638	1	259	1	12231	FBgn0039709
GO:0034185	apolipoprotein binding	molecular_function	0.021164	0.26638	1	259	1	12231	FBgn0038975
GO:0034772	histone H4-K20 dimethylation	biological_process	0.021164	0.26638	1	259	1	12231	FBgn0025639
GO:0035024	negative regulation of Rho protein signal transduction	biological_process	0.021164	0.26638	1	259	1	12231	FBgn0086901
GO:0042250	maintenance of polarity of embryonic epithelium	biological_process	0.021164	0.26638	1	259	1	12231	FBgn0000633
GO:0042426	choline catabolic process	biological_process	0.021164	0.26638	1	259	1	12231	FBgn0000024
GO:0045218	zonula adherens maintenance	biological_process	0.021164	0.26638	1	259	1	12231	FBgn0259685
GO:0046681	response to carbamate	biological_process	0.021164	0.26638	1	259	1	12231	FBgn0000024
GO:0048101	calcium- and calmodulin-regulated 3',5'-cyclic-GMP phosphodiesterase activity	molecular_function	0.021164	0.26638	1	259	1	12231	FBgn0264815
GO:0048105	establishment of body hair planar orientation	biological_process	0.021164	0.26638	1	259	1	12231	FBgn0001075
GO:0048495	Roundabout binding	molecular_function	0.021164	0.26638	1	259	1	12231	FBgn0264089
GO:0050432	catecholamine secretion	biological_process	0.021164	0.26638	1	259	1	12231	FBgn0263397
GO:0050433	regulation of catecholamine secretion	biological_process	0.021164	0.26638	1	259	1	12231	FBgn0263397
GO:0050811	GABA receptor binding	molecular_function	0.021164	0.26638	1	259	1	12231	FBgn0266418
GO:0051932	synaptic transmission, GABAergic	biological_process	0.021164	0.26638	1	259	1	12231	FBgn0083975
GO:0051952	regulation of amine transport	biological_process	0.021164	0.26638	1	259	1	12231	FBgn0263397
GO:0060465	pharynx development	biological_process	0.021164	0.26638	1	259	1	12231	FBgn0262975
GO:0061336	cell morphogenesis involved in Malpighian tubule morphogenesis	biological_process	0.021164	0.26638	1	259	1	12231	FBgn0259685
GO:0071938	vitamin A transport	biological_process	0.021164	0.26638	1	259	1	12231	FBgn0038975
GO:0097107	postsynaptic density assembly	biological_process	0.021164	0.26638	1	259	1	12231	FBgn0040752
GO:0097109	neuroligin family protein binding	molecular_function	0.021164	0.26638	1	259	1	12231	FBgn0038975
GO:2001262	positive regulation of semaphorin-plexin signaling pathway	biological_process	0.021164	0.26638	1	259	1	12231	FBgn0261451
GO:0002027	regulation of heart rate	biological_process	0.021612	0.26852	2	259	11	12231	FBgn0263111,FBgn0033494
GO:0007445	determination of imaginal disc primordium	biological_process	0.021612	0.26852	2	259	11	12231	FBgn0004635,FBgn0003118
GO:0061331	epithelial cell proliferation involved in Malpighian tubule morphogenesis	biological_process	0.021612	0.26852	2	259	11	12231	FBgn0004635,FBgn0003118
GO:2001013	epithelial cell proliferation involved in renal tubule morphogenesis	biological_process	0.021612	0.26852	2	259	11	12231	FBgn0004635,FBgn0003118
GO:0017015	regulation of transforming growth factor beta receptor signaling pathway	biological_process	0.021614	0.26852	2	259	11	12231	FBgn0040271,FBgn0039932
GO:1903844	regulation of cellular response to transforming growth factor beta stimulus	biological_process	0.021614	0.26852	2	259	11	12231	FBgn0039932,FBgn0040271
GO:0034331	cell junction maintenance	biological_process	0.021636	0.26852	2	259	11	12231	FBgn0259685,FBgn0003392
GO:0007509	mesoderm migration involved in gastrulation	biological_process	0.021636	0.26852	2	259	11	12231	FBgn0020299,FBgn0264089
GO:0015491	cation:cation antiporter activity	molecular_function	0.021636	0.26852	2	259	11	12231	FBgn0028704,FBgn0013995
GO:0016201	synaptic target inhibition	biological_process	0.021636	0.26852	2	259	11	12231	FBgn0033791,FBgn0040271
GO:0048100	wing disc anterior/posterior pattern formation	biological_process	0.021636	0.26852	2	259	11	12231	FBgn0000179,FBgn0004859
GO:0009314	response to radiation	biological_process	0.021912	0.27159	8	259	162	12231	FBgn0262738,FBgn0041604,FBgn0259234,FBgn0013995,FBgn0032593,FBgn0000024,FBgn0001624,FBgn0263111
GO:0044706	multi-multicellular organism process	biological_process	0.022107	0.27366	7	259	132	12231	FBgn0264815,FBgn0263111,FBgn0086675,FBgn0001624,FBgn0262477,FBgn0264607,FBgn0004795
GO:0050804	modulation of synaptic transmission	biological_process	0.022335	0.27613	5	259	76	12231	FBgn0038837,FBgn0260003,FBgn0003392,FBgn0263111,FBgn0038975
GO:0007264	small GTPase mediated signal transduction	biological_process	0.022737	0.28075	10	259	227	12231	FBgn0032388,FBgn0023172,FBgn0264707,FBgn0043070,FBgn0263706,FBgn0086901,FBgn0003118,FBgn0013469,FBgn0261570,FBgn0262562
GO:0005924	cell-substrate adherens junction	cellular_component	0.022821	0.28108	3	259	29	12231	FBgn0000244,FBgn0033504,FBgn0265991
GO:0048332	mesoderm morphogenesis	biological_process	0.022821	0.28108	3	259	29	12231	FBgn0264089,FBgn0085432,FBgn0020299
GO:0022891	substrate-specific transmembrane transporter activity	molecular_function	0.023344	0.28715	22	259	660	12231	FBgn0263111,FBgn0051634,FBgn0263397,FBgn0259822,FBgn0013995,FBgn0037387,FBgn0030707,FBgn0260964,FBgn0000036,FBgn0036732,FBgn0259111,FBgn0259145,FBgn0267727,FBgn0264908,FBgn0028704,FBgn0032593,FBgn0038652,FBgn0038837,FBgn0033494,FBgn0032151,FBgn0034247,FBgn0034911
GO:0048149	behavioral response to ethanol	biological_process	0.023918	0.29385	4	259	52	12231	FBgn0000479,FBgn0028990,FBgn0025631,FBgn0004635
GO:0034329	cell junction assembly	biological_process	0.023997	0.29444	4	259	52	12231	FBgn0259685,FBgn0028369,FBgn0025631,FBgn0001624
GO:0044822	poly(A) RNA binding	molecular_function	0.024334	0.2982	9	259	197	12231	FBgn0000182,FBgn0004587,FBgn0038826,FBgn0052423,FBgn0039920,FBgn0086675,FBgn0264001,FBgn0000114,FBgn0267791
GO:0046666	retinal cell programmed cell death	biological_process	0.02497	0.30524	3	259	30	12231	FBgn0013469,FBgn0262738,FBgn0003392
GO:0030055	cell-substrate junction	cellular_component	0.02497	0.30524	3	259	30	12231	FBgn0265991,FBgn0033504,FBgn0000244
GO:0007602	phototransduction	biological_process	0.025538	0.31067	4	259	53	12231	FBgn0263111,FBgn0262738,FBgn0259234,FBgn0013995
GO:0032956	regulation of actin cytoskeleton organization	biological_process	0.025538	0.31067	4	259	53	12231	FBgn0052082,FBgn0029157,FBgn0003392,FBgn0264272
GO:0032970	regulation of actin filament-based process	biological_process	0.025538	0.31067	4	259	53	12231	FBgn0052082,FBgn0029157,FBgn0003392,FBgn0264272
GO:0035160	maintenance of epithelial integrity, open tracheal system	biological_process	0.02558	0.31067	2	259	12	12231	FBgn0004635,FBgn0086901
GO:0045880	positive regulation of smoothened signaling pathway	biological_process	0.025606	0.31067	2	259	12	12231	FBgn0040271,FBgn0041604
GO:0005881	cytoplasmic microtubule	cellular_component	0.025606	0.31067	2	259	12	12231	FBgn0019968,FBgn0029881
GO:0007178	transmembrane receptor protein serine/threonine kinase signaling pathway	biological_process	0.025898	0.31383	5	259	79	12231	FBgn0039932,FBgn0041604,FBgn0040271,FBgn0038197,FBgn0003117
GO:0014070	response to organic cyclic compound	biological_process	0.025965	0.31425	6	259	107	12231	FBgn0264490,FBgn0025631,FBgn0000448,FBgn0035849,FBgn0000210,FBgn0004914
GO:0005102	receptor binding	molecular_function	0.026509	0.32043	9	259	200	12231	FBgn0261563,FBgn0266418,FBgn0004360,FBgn0001624,FBgn0041092,FBgn0083975,FBgn0038975,FBgn0264089,FBgn0031903
GO:0007450	dorsal/ventral pattern formation, imaginal disc	biological_process	0.027137	0.32722	4	259	54	12231	FBgn0010575,FBgn0041604,FBgn0003118,FBgn0041111
GO:0005231	excitatory extracellular ligand-gated ion channel activity	molecular_function	0.027137	0.32722	4	259	54	12231	FBgn0032151,FBgn0264908,FBgn0038837,FBgn0000036
GO:0030155	regulation of cell adhesion	biological_process	0.027224	0.32746	3	259	31	12231	FBgn0264089,FBgn0001624,FBgn0261563
GO:0034332	adherens junction organization	biological_process	0.027224	0.32746	3	259	31	12231	FBgn0003392,FBgn0259685,FBgn0028369
GO:0032535	regulation of cellular component size	biological_process	0.028164	0.33835	6	259	109	12231	FBgn0039709,FBgn0041111,FBgn0029157,FBgn0263980,FBgn0038197,FBgn0264272
GO:0098805	whole membrane	cellular_component	0.02844	0.34125	13	259	339	12231	FBgn0264607,FBgn0032151,FBgn0004449,FBgn0259685,FBgn0034145,FBgn0000036,FBgn0039709,FBgn0261260,FBgn0086901,FBgn0023172,FBgn0001624,FBgn0263111,FBgn0039928
GO:0044085	cellular component biogenesis	biological_process	0.028692	0.34385	29	259	949	12231	FBgn0004587,FBgn0264272,FBgn0014343,FBgn0267727,FBgn0083975,FBgn0011817,FBgn0038975,FBgn0262975,FBgn0003392,FBgn0264695,FBgn0032252,FBgn0038826,FBgn0001624,FBgn0264693,FBgn0052082,FBgn0265356,FBgn0263111,FBgn0025391,FBgn0029157,FBgn0264607,FBgn0034636,FBgn0259685,FBgn0004449,FBgn0039709,FBgn0265991,FBgn0040752,FBgn0025631,FBgn0041111,FBgn0028369
GO:0005088	Ras guanyl-nucleotide exchange factor activity	molecular_function	0.028795	0.34466	4	259	55	12231	FBgn0264707,FBgn0023172,FBgn0263706,FBgn0262562
GO:0060341	regulation of cellular localization	biological_process	0.029269	0.3499	7	259	140	12231	FBgn0260003,FBgn0263397,FBgn0259685,FBgn0023091,FBgn0038975,FBgn0263111,FBgn0262975
GO:0007179	transforming growth factor beta receptor signaling pathway	biological_process	0.029567	0.35193	3	259	32	12231	FBgn0040271,FBgn0039932,FBgn0003117
GO:0045931	positive regulation of mitotic cell cycle	biological_process	0.029579	0.35193	3	259	32	12231	FBgn0020309,FBgn0004859,FBgn0000114
GO:0001704	formation of primary germ layer	biological_process	0.029583	0.35193	3	259	32	12231	FBgn0264089,FBgn0085432,FBgn0020299
GO:0016028	rhabdomere	cellular_component	0.029583	0.35193	3	259	32	12231	FBgn0262738,FBgn0032593,FBgn0259685
GO:0017145	stem cell division	biological_process	0.029821	0.3529	5	259	82	12231	FBgn0001624,FBgn0004606,FBgn0261451,FBgn0000114,FBgn0013469
GO:0043704	photoreceptor cell fate specification	biological_process	0.029844	0.3529	2	259	13	12231	FBgn0000413,FBgn0005677
GO:0042074	cell migration involved in gastrulation	biological_process	0.029845	0.3529	2	259	13	12231	FBgn0020299,FBgn0264089
GO:0005720	nuclear heterochromatin	cellular_component	0.029845	0.3529	2	259	13	12231	FBgn0025639,FBgn0005624
GO:0019935	cyclic-nucleotide-mediated signaling	biological_process	0.029845	0.3529	2	259	13	12231	FBgn0259145,FBgn0000479
GO:0042048	olfactory behavior	biological_process	0.030378	0.35877	6	259	111	12231	FBgn0041111,FBgn0016926,FBgn0000479,FBgn0266098,FBgn0004635,FBgn0003392
GO:0048645	organ formation	biological_process	0.030501	0.35978	4	259	56	12231	FBgn0013469,FBgn0004859,FBgn0264089,FBgn0004635
GO:0001752	compound eye photoreceptor fate commitment	biological_process	0.032283	0.38035	4	259	57	12231	FBgn0000210,FBgn0005630,FBgn0000413,FBgn0003118
GO:0008152	metabolic process	biological_process	0.033155	0.39015	127	259	5292	12231	FBgn0000182,FBgn0264707,FBgn0259234,FBgn0031903,FBgn0010407,FBgn0014343,FBgn0053531,FBgn0000179,FBgn0085432,FBgn0029791,FBgn0264001,FBgn0015032,FBgn0259099,FBgn0005677,FBgn0000448,FBgn0264693,FBgn0031530,FBgn0040271,FBgn0029157,FBgn0013531,FBgn0035849,FBgn0000497,FBgn0033791,FBgn0034903,FBgn0020307,FBgn0011481,FBgn0041111,FBgn0000114,FBgn0030738,FBgn0260397,FBgn0004914,FBgn0051619,FBgn0041092,FBg…
GO:0044421	extracellular region part	cellular_component	0.033445	0.39309	17	259	494	12231	FBgn0004449,FBgn0004360,FBgn0261451,FBgn0261563,FBgn0264815,FBgn0034070,FBgn0028990,FBgn0032252,FBgn0000299,FBgn0022770,FBgn0039054,FBgn0029791,FBgn0041604,FBgn0264089,FBgn0031903,FBgn0010470,FBgn0051619
GO:0005911	cell-cell junction	cellular_component	0.034095	0.39925	5	259	85	12231	FBgn0001624,FBgn0025631,FBgn0028369,FBgn0085408,FBgn0259685
GO:0042706	eye photoreceptor cell fate commitment	biological_process	0.034119	0.39925	4	259	58	12231	FBgn0000210,FBgn0005630,FBgn0003118,FBgn0000413
GO:0043296	apical junction complex	cellular_component	0.034122	0.39925	4	259	58	12231	FBgn0001624,FBgn0025631,FBgn0085408,FBgn0259685
GO:0040008	regulation of growth	biological_process	0.034133	0.39925	10	259	243	12231	FBgn0264607,FBgn0003392,FBgn0001075,FBgn0259685,FBgn0010575,FBgn0041604,FBgn0038197,FBgn0011817,FBgn0001624,FBgn0263111
GO:0007539	primary sex determination, soma	biological_process	0.034337	0.40073	2	259	14	12231	FBgn0000413,FBgn0001139
GO:0015298	solute:cation antiporter activity	molecular_function	0.034341	0.40073	2	259	14	12231	FBgn0028704,FBgn0013995
GO:0043229	intracellular organelle	cellular_component	0.034426	0.40123	99	259	4007	12231	FBgn0020307,FBgn0011481,FBgn0041111,FBgn0000114,FBgn0030738,FBgn0260397,FBgn0004914,FBgn0000448,FBgn0264693,FBgn0031530,FBgn0040271,FBgn0029157,FBgn0013531,FBgn0035849,FBgn0085432,FBgn0003175,FBgn0015032,FBgn0015600,FBgn0005677,FBgn0259234,FBgn0014343,FBgn0000179,FBgn0003499,FBgn0013469,FBgn0000557,FBgn0001320,FBgn0045852,FBgn0010575,FBgn0261963,FBgn0267727,FBgn0041092,FBgn0000559,FBgn0030872,FBg…
GO:0071559	response to transforming growth factor beta	biological_process	0.034596	0.4015	3	259	34	12231	FBgn0003117,FBgn0039932,FBgn0040271
GO:0071560	cellular response to transforming growth factor beta stimulus	biological_process	0.034596	0.4015	3	259	34	12231	FBgn0003117,FBgn0040271,FBgn0039932
GO:0005918	septate junction	cellular_component	0.034612	0.4015	3	259	34	12231	FBgn0259685,FBgn0001624,FBgn0025631
GO:0016323	basolateral plasma membrane	cellular_component	0.034613	0.4015	3	259	34	12231	FBgn0086901,FBgn0263111,FBgn0001624
GO:0030534	adult behavior	biological_process	0.035551	0.4116	7	259	146	12231	FBgn0263111,FBgn0000479,FBgn0028990,FBgn0025631,FBgn0004635,FBgn0259099,FBgn0262738
GO:0051235	maintenance of location	biological_process	0.035584	0.4116	5	259	86	12231	FBgn0000244,FBgn0262975,FBgn0025391,FBgn0262738,FBgn0038197
GO:0050767	regulation of neurogenesis	biological_process	0.03561	0.4116	7	259	146	12231	FBgn0029157,FBgn0003118,FBgn0023172,FBgn0001319,FBgn0086901,FBgn0013469,FBgn0045852
GO:0000003	reproduction	biological_process	0.036532	0.42176	36	259	1256	12231	FBgn0263111,FBgn0029881,FBgn0038826,FBgn0020299,FBgn0086675,FBgn0004859,FBgn0000114,FBgn0260397,FBgn0000479,FBgn0000182,FBgn0004606,FBgn0004795,FBgn0014343,FBgn0264695,FBgn0015600,FBgn0262477,FBgn0005677,FBgn0023172,FBgn0001624,FBgn0022770,FBgn0039709,FBgn0264815,FBgn0264607,FBgn0000210,FBgn0011826,FBgn0259685,FBgn0264442,FBgn0000413,FBgn0041092,FBgn0267727,FBgn0262975,FBgn0005630,FBgn0004635,FBg…
GO:0048675	axon extension	biological_process	0.037212	0.42859	3	259	35	12231	FBgn0004360,FBgn0041092,FBgn0000479
GO:1990138	neuron projection extension	biological_process	0.037212	0.42859	3	259	35	12231	FBgn0000479,FBgn0041092,FBgn0004360
GO:0050773	regulation of dendrite development	biological_process	0.037283	0.42891	3	259	35	12231	FBgn0045852,FBgn0001319,FBgn0086901
GO:0000380	alternative mRNA splicing, via spliceosome	biological_process	0.037848	0.43423	4	259	60	12231	FBgn0039920,FBgn0267791,FBgn0004587,FBgn0000114
GO:0000381	regulation of alternative mRNA splicing, via spliceosome	biological_process	0.037848	0.43423	4	259	60	12231	FBgn0039920,FBgn0267791,FBgn0004587,FBgn0000114
GO:0051124	synaptic growth at neuromuscular junction	biological_process	0.037924	0.43423	6	259	117	12231	FBgn0263111,FBgn0011817,FBgn0038975,FBgn0001624,FBgn0004449,FBgn0264607
GO:0005938	cell cortex	cellular_component	0.037924	0.43423	6	259	117	12231	FBgn0086901,FBgn0023172,FBgn0003382,FBgn0001624,FBgn0085408,FBgn0015600
GO:0005874	microtubule	cellular_component	0.037972	0.43428	4	259	60	12231	FBgn0019968,FBgn0015600,FBgn0264693,FBgn0029881
GO:0016607	nuclear speck	cellular_component	0.038788	0.43657	2	259	15	12231	FBgn0267791,FBgn0004587
GO:0042693	muscle cell fate commitment	biological_process	0.039081	0.43657	2	259	15	12231	FBgn0001319,FBgn0015919
GO:0008078	mesodermal cell migration	biological_process	0.039081	0.43657	2	259	15	12231	FBgn0020299,FBgn0264089
GO:0008201	heparin binding	molecular_function	0.039081	0.43657	2	259	15	12231	FBgn0000108,FBgn0264089
GO:0030863	cortical cytoskeleton	cellular_component	0.039081	0.43657	2	259	15	12231	FBgn0085408,FBgn0023172
GO:0036315	cellular response to sterol	biological_process	0.039081	0.43657	2	259	15	12231	FBgn0264490,FBgn0000210
GO:0046928	regulation of neurotransmitter secretion	biological_process	0.039081	0.43657	2	259	15	12231	FBgn0263111,FBgn0260003
GO:0048167	regulation of synaptic plasticity	biological_process	0.039081	0.43657	2	259	15	12231	FBgn0003392,FBgn0260003
GO:0051588	regulation of neurotransmitter transport	biological_process	0.039081	0.43657	2	259	15	12231	FBgn0260003,FBgn0263111
GO:0071390	cellular response to ecdysone	biological_process	0.039081	0.43657	2	259	15	12231	FBgn0264490,FBgn0000210
GO:1901655	cellular response to ketone	biological_process	0.039081	0.43657	2	259	15	12231	FBgn0264490,FBgn0000210
GO:0042440	pigment metabolic process	biological_process	0.039214	0.43657	6	259	118	12231	FBgn0259099,FBgn0003117,FBgn0025936,FBgn0003499,FBgn0028990,FBgn0264707
GO:0004888	transmembrane signaling receptor activity	molecular_function	0.039697	0.43657	13	259	356	12231	FBgn0010407,FBgn0004842,FBgn0053531,FBgn0025936,FBgn0260753,FBgn0052843,FBgn0038880,FBgn0261929,FBgn0038837,FBgn0030707,FBgn0000036,FBgn0025631,FBgn0262869
GO:0006582	melanin metabolic process	biological_process	0.039893	0.43657	4	259	61	12231	FBgn0028990,FBgn0264707,FBgn0259099,FBgn0025936
GO:0045017	glycerolipid biosynthetic process	biological_process	0.039952	0.43657	3	259	36	12231	FBgn0085390,FBgn0032955,FBgn0262738
GO:0009953	dorsal/ventral pattern formation	biological_process	0.040236	0.43657	7	259	150	12231	FBgn0038826,FBgn0041111,FBgn0262975,FBgn0003118,FBgn0010575,FBgn0041604,FBgn0028990
GO:0004103	choline kinase activity	molecular_function	0.041106	0.43657	1	259	2	12231	FBgn0032955
GO:0004305	ethanolamine kinase activity	molecular_function	0.041106	0.43657	1	259	2	12231	FBgn0032955
GO:0016723	oxidoreductase activity, oxidizing metal ions, NAD or NADP as acceptor	molecular_function	0.041423	0.43657	1	259	2	12231	FBgn0034067
GO:0008237	metallopeptidase activity	molecular_function	0.041504	0.43657	7	259	151	12231	FBgn0029791,FBgn0051619,FBgn0032536,FBgn0034903,FBgn0004885,FBgn0039277,FBgn0032252
GO:0001221	transcription cofactor binding	molecular_function	0.041603	0.43657	1	259	2	12231	FBgn0261963
GO:0001224	RNA polymerase II transcription cofactor binding	molecular_function	0.041603	0.43657	1	259	2	12231	FBgn0261963
GO:0014018	neuroblast fate specification	biological_process	0.041603	0.43657	1	259	2	12231	FBgn0261963
GO:0048866	stem cell fate specification	biological_process	0.041603	0.43657	1	259	2	12231	FBgn0261963
GO:0043034	costamere	cellular_component	0.041658	0.43657	1	259	2	12231	FBgn0025391
GO:0035067	negative regulation of histone acetylation	biological_process	0.041702	0.43657	1	259	2	12231	FBgn0261573
GO:0061086	negative regulation of histone H3-K27 methylation	biological_process	0.041702	0.43657	1	259	2	12231	FBgn0261573
GO:1901984	negative regulation of protein acetylation	biological_process	0.041702	0.43657	1	259	2	12231	FBgn0261573
GO:2000618	regulation of histone H4-K16 acetylation	biological_process	0.041702	0.43657	1	259	2	12231	FBgn0261573
GO:2000757	negative regulation of peptidyl-lysine acetylation	biological_process	0.041702	0.43657	1	259	2	12231	FBgn0261573
GO:0038004	epidermal growth factor receptor ligand maturation	biological_process	0.04175	0.43657	1	259	2	12231	FBgn0004635
GO:0046332	SMAD binding	molecular_function	0.041755	0.43657	1	259	2	12231	FBgn0039932
GO:0031536	positive regulation of exit from mitosis	biological_process	0.041846	0.43657	1	259	2	12231	FBgn0000114
GO:0035106	operant conditioning	biological_process	0.041853	0.43657	1	259	2	12231	FBgn0262477
GO:0035095	behavioral response to nicotine	biological_process	0.041871	0.43657	1	259	2	12231	FBgn0025631
GO:0060563	neuroepithelial cell differentiation	biological_process	0.041875	0.43657	1	259	2	12231	FBgn0000413
GO:0061101	neuroendocrine cell differentiation	biological_process	0.041875	0.43657	1	259	2	12231	FBgn0000413
GO:0005954	calcium- and calmodulin-dependent protein kinase complex	cellular_component	0.041882	0.43657	1	259	2	12231	FBgn0264607
GO:0060278	regulation of ovulation	biological_process	0.041882	0.43657	1	259	2	12231	FBgn0264607
GO:0097374	sensory neuron axon guidance	biological_process	0.041882	0.43657	1	259	2	12231	FBgn0014343
GO:0071927	octopamine signaling pathway	biological_process	0.041882	0.43657	1	259	2	12231	FBgn0038197
GO:0051371	muscle alpha-actinin binding	molecular_function	0.041882	0.43657	1	259	2	12231	FBgn0265991
GO:0015106	bicarbonate transmembrane transporter activity	molecular_function	0.041882	0.43657	1	259	2	12231	FBgn0259111
GO:0015701	bicarbonate transport	biological_process	0.041882	0.43657	1	259	2	12231	FBgn0259111
GO:0048013	ephrin receptor signaling pathway	biological_process	0.041882	0.43657	1	259	2	12231	FBgn0025936
GO:0001205	transcriptional activator activity, RNA polymerase II distal enhancer sequence-specific binding	molecular_function	0.041882	0.43657	1	259	2	12231	FBgn0004859
GO:0004104	cholinesterase activity	molecular_function	0.041882	0.43657	1	259	2	12231	FBgn0000024
GO:0004887	thyroid hormone receptor activity	molecular_function	0.041882	0.43657	1	259	2	12231	FBgn0000448
GO:0005275	amine transmembrane transporter activity	molecular_function	0.041882	0.43657	1	259	2	12231	FBgn0260964
GO:0005432	calcium:sodium antiporter activity	molecular_function	0.041882	0.43657	1	259	2	12231	FBgn0013995
GO:0010737	protein kinase A signaling	biological_process	0.041882	0.43657	1	259	2	12231	FBgn0000479
GO:0010738	regulation of protein kinase A signaling	biological_process	0.041882	0.43657	1	259	2	12231	FBgn0000479
GO:0014904	myotube cell development	biological_process	0.041882	0.43657	1	259	2	12231	FBgn0264693
GO:0015187	glycine transmembrane transporter activity	molecular_function	0.041882	0.43657	1	259	2	12231	FBgn0034911
GO:0032529	follicle cell microvillus organization	biological_process	0.041882	0.43657	1	259	2	12231	FBgn0039709
GO:0034773	histone H4-K20 trimethylation	biological_process	0.041882	0.43657	1	259	2	12231	FBgn0025639
GO:0042070	maintenance of oocyte nucleus location involved in oocyte dorsal/ventral axis specification	biological_process	0.041882	0.43657	1	259	2	12231	FBgn0262975
GO:0042135	neurotransmitter catabolic process	biological_process	0.041882	0.43657	1	259	2	12231	FBgn0000024
GO:0048741	skeletal muscle fiber development	biological_process	0.041882	0.43657	1	259	2	12231	FBgn0264693
GO:0051608	histamine transport	biological_process	0.041882	0.43657	1	259	2	12231	FBgn0260964
GO:0051657	maintenance of organelle location	biological_process	0.041882	0.43657	1	259	2	12231	FBgn0262975
GO:0051658	maintenance of nucleus location	biological_process	0.041882	0.43657	1	259	2	12231	FBgn0262975
GO:0097106	postsynaptic density organization	biological_process	0.041882	0.43657	1	259	2	12231	FBgn0040752
GO:2000574	regulation of microtubule motor activity	biological_process	0.041882	0.43657	1	259	2	12231	FBgn0264693
GO:0001580	detection of chemical stimulus involved in sensory perception of bitter taste	biological_process	0.041882	0.43657	1	259	2	12231	FBgn0262738
GO:0005587	collagen type IV trimer	cellular_component	0.041882	0.43657	1	259	2	12231	FBgn0000299
GO:0005606	laminin-1 complex	cellular_component	0.041882	0.43657	1	259	2	12231	FBgn0261563
GO:0006651	diacylglycerol biosynthetic process	biological_process	0.041882	0.43657	1	259	2	12231	FBgn0262738
GO:0008332	low voltage-gated calcium channel activity	molecular_function	0.041882	0.43657	1	259	2	12231	FBgn0263111
GO:0008377	light-induced release of internally sequestered calcium ion	biological_process	0.041882	0.43657	1	259	2	12231	FBgn0262738
GO:0035258	steroid hormone receptor binding	molecular_function	0.041882	0.43657	1	259	2	12231	FBgn0041092
GO:0035848	oviduct morphogenesis	biological_process	0.041882	0.43657	1	259	2	12231	FBgn0000299
GO:0043256	laminin complex	cellular_component	0.041882	0.43657	1	259	2	12231	FBgn0261563
GO:0045217	cell-cell junction maintenance	biological_process	0.041882	0.43657	1	259	2	12231	FBgn0259685
GO:0046864	isoprenoid transport	biological_process	0.041882	0.43657	1	259	2	12231	FBgn0038975
GO:0046865	terpenoid transport	biological_process	0.041882	0.43657	1	259	2	12231	FBgn0038975
GO:0060066	oviduct development	biological_process	0.041882	0.43657	1	259	2	12231	FBgn0000299
GO:0071666	Slit-Robo signaling complex	cellular_component	0.041882	0.43657	1	259	2	12231	FBgn0264089
GO:0098642	network-forming collagen trimer	cellular_component	0.041882	0.43657	1	259	2	12231	FBgn0000299
GO:0098644	complex of collagen trimers	cellular_component	0.041882	0.43657	1	259	2	12231	FBgn0000299
GO:0098645	collagen network	cellular_component	0.041882	0.43657	1	259	2	12231	FBgn0000299
GO:0098651	basement membrane collagen trimer	cellular_component	0.041882	0.43657	1	259	2	12231	FBgn0000299
GO:2001260	regulation of semaphorin-plexin signaling pathway	biological_process	0.041882	0.43657	1	259	2	12231	FBgn0261451
GO:0007600	sensory perception	biological_process	0.042771	0.44535	13	259	360	12231	FBgn0032593,FBgn0029974,FBgn0033504,FBgn0263111,FBgn0040823,FBgn0053481,FBgn0259099,FBgn0052600,FBgn0262738,FBgn0034286,FBgn0041604,FBgn0051163,FBgn0030723
GO:1901681	sulfur compound binding	molecular_function	0.042931	0.44607	3	259	37	12231	FBgn0264089,FBgn0000108,FBgn0041604
GO:0009636	response to toxic substance	biological_process	0.042931	0.44607	3	259	37	12231	FBgn0032151,FBgn0000024,FBgn0000036
GO:0005355	glucose transmembrane transporter activity	molecular_function	0.043453	0.45083	2	259	16	12231	FBgn0037387,FBgn0034247
GO:0003746	translation elongation factor activity	molecular_function	0.043976	0.45083	2	259	16	12231	FBgn0000559,FBgn0000557
GO:0050673	epithelial cell proliferation	biological_process	0.04402	0.45083	2	259	16	12231	FBgn0003118,FBgn0004635
GO:0048854	brain morphogenesis	biological_process	0.044036	0.45083	2	259	16	12231	FBgn0005630,FBgn0019650
GO:0007464	R3/R4 cell fate commitment	biological_process	0.044043	0.45083	2	259	16	12231	FBgn0003118,FBgn0005630
GO:0007428	primary branching, open tracheal system	biological_process	0.044052	0.45083	2	259	16	12231	FBgn0020299,FBgn0003118
GO:0030536	larval feeding behavior	biological_process	0.044053	0.45083	2	259	16	12231	FBgn0003392,FBgn0013469
GO:0012502	induction of programmed cell death	biological_process	0.044053	0.45083	2	259	16	12231	FBgn0000210,FBgn0264490
GO:0035072	ecdysone-mediated induction of salivary gland cell autophagic cell death	biological_process	0.044053	0.45083	2	259	16	12231	FBgn0264490,FBgn0000210
GO:0035078	induction of programmed cell death by ecdysone	biological_process	0.044053	0.45083	2	259	16	12231	FBgn0000210,FBgn0264490
GO:0035081	induction of programmed cell death by hormones	biological_process	0.044053	0.45083	2	259	16	12231	FBgn0000210,FBgn0264490
GO:0042045	epithelial fluid transport	biological_process	0.044053	0.45083	2	259	16	12231	FBgn0259685,FBgn0263111
GO:0045494	photoreceptor cell maintenance	biological_process	0.044053	0.45083	2	259	16	12231	FBgn0259685,FBgn0262738
GO:0051294	establishment of spindle orientation	biological_process	0.044053	0.45083	2	259	16	12231	FBgn0019968,FBgn0001624
GO:0045471	response to ethanol	biological_process	0.044081	0.45083	4	259	63	12231	FBgn0000479,FBgn0028990,FBgn0025631,FBgn0004635
GO:0035214	eye-antennal disc development	biological_process	0.044191	0.45148	4	259	63	12231	FBgn0003382,FBgn0019650,FBgn0003118,FBgn0005677
GO:0016485	protein processing	biological_process	0.046374	0.47329	4	259	64	12231	FBgn0264490,FBgn0004885,FBgn0004509,FBgn0004635
GO:0010608	posttranscriptional regulation of gene expression	biological_process	0.046503	0.47411	6	259	123	12231	FBgn0000114,FBgn0263974,FBgn0038826,FBgn0000182,FBgn0039260,FBgn0264001
GO:0043226	organelle	cellular_component	0.048279	0.4917	99	259	4062	12231	FBgn0030872,FBgn0041092,FBgn0267727,FBgn0000559,FBgn0019968,FBgn0262139,FBgn0005630,FBgn0005624,FBgn0261090,FBgn0039920,FBgn0038197,FBgn0025639,FBgn0010575,FBgn0261963,FBgn0001320,FBgn0045852,FBgn0003499,FBgn0000557,FBgn0013469,FBgn0259234,FBgn0000179,FBgn0014343,FBgn0015032,FBgn0015600,FBgn0003175,FBgn0085432,FBgn0005677,FBgn0031530,FBgn0264693,FBgn0000448,FBgn0013531,FBgn0040271,FBgn0029157,FBg…
GO:0008355	olfactory learning	biological_process	0.048627	0.49385	4	259	65	12231	FBgn0004635,FBgn0266098,FBgn0003392,FBgn0000479
GO:0007274	neuromuscular synaptic transmission	biological_process	0.048641	0.49385	4	259	65	12231	FBgn0039260,FBgn0038975,FBgn0086901,FBgn0260003
GO:0009986	cell surface	cellular_component	0.048642	0.49385	4	259	65	12231	FBgn0083975,FBgn0262869,FBgn0040271,FBgn0028369
GO:0007016	cytoskeletal anchoring at plasma membrane	biological_process	0.049188	0.49636	2	259	17	12231	FBgn0025391,FBgn0000244
GO:0007479	leg disc proximal/distal pattern formation	biological_process	0.049211	0.49636	2	259	17	12231	FBgn0004635,FBgn0005677
GO:0010669	epithelial structure maintenance	biological_process	0.049211	0.49636	2	259	17	12231	FBgn0004635,FBgn0086901
GO:0048056	R3/R4 cell differentiation	biological_process	0.049235	0.49636	2	259	17	12231	FBgn0003118,FBgn0005630
GO:0016059	deactivation of rhodopsin mediated signaling	biological_process	0.049244	0.49636	2	259	17	12231	FBgn0259234,FBgn0262738
GO:0022400	regulation of rhodopsin mediated signaling pathway	biological_process	0.049244	0.49636	2	259	17	12231	FBgn0259234,FBgn0262738
GO:0034333	adherens junction assembly	biological_process	0.049244	0.49636	2	259	17	12231	FBgn0259685,FBgn0028369
GO:0022892	substrate-specific transporter activity	molecular_function	0.049683	0.50026	22	259	715	12231	FBgn0038837,FBgn0033494,FBgn0034247,FBgn0032151,FBgn0034911,FBgn0038652,FBgn0264908,FBgn0028704,FBgn0032593,FBgn0259145,FBgn0267727,FBgn0036732,FBgn0259111,FBgn0037387,FBgn0030707,FBgn0260964,FBgn0000036,FBgn0259822,FBgn0263397,FBgn0013995,FBgn0263111,FBgn0051634
GO:0048024	regulation of mRNA splicing, via spliceosome	biological_process	0.050808	0.51106	4	259	66	12231	FBgn0267791,FBgn0039920,FBgn0000114,FBgn0004587
GO:0019827	stem cell population maintenance	biological_process	0.05095	0.51144	4	259	66	12231	FBgn0013469,FBgn0000114,FBgn0038197,FBgn0000413
GO:0098727	maintenance of cell number	biological_process	0.05095	0.51144	4	259	66	12231	FBgn0038197,FBgn0000114,FBgn0013469,FBgn0000413
GO:0051651	maintenance of location in cell	biological_process	0.052118	0.522	3	259	40	12231	FBgn0025391,FBgn0262975,FBgn0000244
GO:0019901	protein kinase binding	molecular_function	0.052152	0.522	3	259	40	12231	FBgn0259685,FBgn0038197,FBgn0015600
GO:0070887	cellular response to chemical stimulus	biological_process	0.052162	0.522	10	259	262	12231	FBgn0040271,FBgn0264490,FBgn0000448,FBgn0038197,FBgn0003117,FBgn0035849,FBgn0039932,FBgn0020299,FBgn0004914,FBgn0000210
GO:0010927	cellular component assembly involved in morphogenesis	biological_process	0.052906	0.5289	8	259	193	12231	FBgn0014343,FBgn0038826,FBgn0025391,FBgn0265356,FBgn0003392,FBgn0264695,FBgn0039709,FBgn0265991
GO:0002520	immune system development	biological_process	0.053298	0.53133	4	259	67	12231	FBgn0267727,FBgn0004606,FBgn0001319,FBgn0003117
GO:0048534	hematopoietic or lymphoid organ development	biological_process	0.053298	0.53133	4	259	67	12231	FBgn0267727,FBgn0004606,FBgn0003117,FBgn0001319
GO:0051604	protein maturation	biological_process	0.053312	0.53133	4	259	67	12231	FBgn0004885,FBgn0264490,FBgn0004635,FBgn0004509
GO:0003729	mRNA binding	molecular_function	0.054151	0.53914	8	259	194	12231	FBgn0000182,FBgn0038826,FBgn0052423,FBgn0004587,FBgn0086675,FBgn0264001,FBgn0267791,FBgn0000114
GO:0085029	extracellular matrix assembly	biological_process	0.054618	0.53965	2	259	18	12231	FBgn0039709,FBgn0032252
GO:0031987	locomotion involved in locomotory behavior	biological_process	0.054635	0.53965	2	259	18	12231	FBgn0005630,FBgn0264693
GO:0018993	somatic sex determination	biological_process	0.05464	0.53965	2	259	18	12231	FBgn0000413,FBgn0001139
GO:0048786	presynaptic active zone	cellular_component	0.054645	0.53965	2	259	18	12231	FBgn0263111,FBgn0264607
GO:0015850	organic hydroxy compound transport	biological_process	0.054645	0.53965	2	259	18	12231	FBgn0263397,FBgn0260964
GO:0016327	apicolateral plasma membrane	cellular_component	0.054645	0.53965	2	259	18	12231	FBgn0259685,FBgn0001624
GO:0001895	retina homeostasis	biological_process	0.054645	0.53965	2	259	18	12231	FBgn0259685,FBgn0262738
GO:0030011	maintenance of cell polarity	biological_process	0.054645	0.53965	2	259	18	12231	FBgn0259685,FBgn0261451
GO:0043297	apical junction assembly	biological_process	0.055419	0.54621	3	259	41	12231	FBgn0259685,FBgn0025631,FBgn0001624
GO:0040012	regulation of locomotion	biological_process	0.055421	0.54621	3	259	41	12231	FBgn0261563,FBgn0038975,FBgn0264089
GO:0007525	somatic muscle development	biological_process	0.055759	0.54899	4	259	68	12231	FBgn0003499,FBgn0264695,FBgn0038197,FBgn0001319
GO:0022857	transmembrane transporter activity	molecular_function	0.056065	0.55144	23	259	765	12231	FBgn0013995,FBgn0263397,FBgn0259822,FBgn0263111,FBgn0051634,FBgn0036732,FBgn0259111,FBgn0030707,FBgn0000036,FBgn0260964,FBgn0037387,FBgn0028704,FBgn0032593,FBgn0264908,FBgn0259145,FBgn0030872,FBgn0267727,FBgn0034911,FBgn0033494,FBgn0038837,FBgn0034247,FBgn0032151,FBgn0038652
GO:0007613	memory	biological_process	0.056843	0.5552	5	259	98	12231	FBgn0266098,FBgn0003392,FBgn0264607,FBgn0000108,FBgn0000479
GO:0051962	positive regulation of nervous system development	biological_process	0.058249	0.5552	4	259	69	12231	FBgn0011817,FBgn0001624,FBgn0263111,FBgn0013469
GO:0016836	hydro-lyase activity	molecular_function	0.058349	0.5552	3	259	42	12231	FBgn0030056,FBgn0052698,FBgn0027844
GO:0090092	regulation of transmembrane receptor protein serine/threonine kinase signaling pathway	biological_process	0.058765	0.5552	3	259	42	12231	FBgn0038197,FBgn0040271,FBgn0039932
GO:0017148	negative regulation of translation	biological_process	0.05878	0.5552	3	259	42	12231	FBgn0264001,FBgn0000182,FBgn0000114
GO:0030017	sarcomere	cellular_component	0.058786	0.5552	3	259	42	12231	FBgn0264695,FBgn0265356,FBgn0265991
GO:0007219	Notch signaling pathway	biological_process	0.059505	0.5552	6	259	131	12231	FBgn0260397,FBgn0029881,FBgn0259685,FBgn0010470,FBgn0003392,FBgn0261573
GO:0015149	hexose transmembrane transporter activity	molecular_function	0.059567	0.5552	2	259	19	12231	FBgn0034247,FBgn0037387
GO:1902533	positive regulation of intracellular signal transduction	biological_process	0.059657	0.5552	6	259	131	12231	FBgn0043070,FBgn0001319,FBgn0263706,FBgn0262562,FBgn0023172,FBgn0032388
GO:0070252	actin-mediated cell contraction	biological_process	0.060228	0.5552	2	259	19	12231	FBgn0039704,FBgn0023172
GO:0007538	primary sex determination	biological_process	0.060238	0.5552	2	259	19	12231	FBgn0001139,FBgn0000413
GO:0007448	anterior/posterior pattern specification, imaginal disc	biological_process	0.060242	0.5552	2	259	19	12231	FBgn0000179,FBgn0004859
GO:0035329	hippo signaling	biological_process	0.060242	0.5552	2	259	19	12231	FBgn0259685,FBgn0001075
GO:0042044	fluid transport	biological_process	0.060242	0.5552	2	259	19	12231	FBgn0263111,FBgn0259685
GO:0046621	negative regulation of organ growth	biological_process	0.060242	0.5552	2	259	19	12231	FBgn0001075,FBgn0259685
GO:0046669	regulation of compound eye retinal cell programmed cell death	biological_process	0.060242	0.5552	2	259	19	12231	FBgn0013469,FBgn0262738
GO:0097306	cellular response to alcohol	biological_process	0.060242	0.5552	2	259	19	12231	FBgn0000210,FBgn0264490
GO:0060560	developmental growth involved in morphogenesis	biological_process	0.06073	0.5552	4	259	70	12231	FBgn0023172,FBgn0000479,FBgn0041092,FBgn0004360
GO:0051493	regulation of cytoskeleton organization	biological_process	0.060962	0.5552	5	259	100	12231	FBgn0029157,FBgn0041111,FBgn0052082,FBgn0264272,FBgn0003392
GO:0035009	negative regulation of melanization defense response	biological_process	0.061224	0.5552	1	259	3	12231	FBgn0028990
GO:0015672	monovalent inorganic cation transport	biological_process	0.061238	0.5552	7	259	165	12231	FBgn0033494,FBgn0259111,FBgn0263397,FBgn0028704,FBgn0037766,FBgn0030872,FBgn0260964
GO:0043231	intracellular membrane-bounded organelle	cellular_component	0.061608	0.5552	82	259	3331	12231	FBgn0013469,FBgn0003499,FBgn0045852,FBgn0001320,FBgn0261963,FBgn0010575,FBgn0261090,FBgn0025639,FBgn0039920,FBgn0038197,FBgn0005630,FBgn0005624,FBgn0019968,FBgn0262139,FBgn0030872,FBgn0267727,FBgn0041092,FBgn0004914,FBgn0260397,FBgn0030738,FBgn0000114,FBgn0011481,FBgn0041111,FBgn0020307,FBgn0035849,FBgn0013531,FBgn0040271,FBgn0031530,FBgn0000448,FBgn0005677,FBgn0015600,FBgn0015032,FBgn0003175,FBg…
GO:0005030	neurotrophin receptor activity	molecular_function	0.061655	0.5552	1	259	3	12231	FBgn0010407
GO:0000059	protein import into nucleus, docking	biological_process	0.061925	0.5552	1	259	3	12231	FBgn0267727
GO:0003909	DNA ligase activity	molecular_function	0.061943	0.5552	1	259	3	12231	FBgn0038035
GO:0003910	DNA ligase (ATP) activity	molecular_function	0.061943	0.5552	1	259	3	12231	FBgn0038035
GO:0006266	DNA ligation	biological_process	0.061943	0.5552	1	259	3	12231	FBgn0038035
GO:0051103	DNA ligation involved in DNA repair	biological_process	0.061943	0.5552	1	259	3	12231	FBgn0038035
GO:0016012	sarcoglycan complex	cellular_component	0.061944	0.5552	1	259	3	12231	FBgn0025391
GO:0031061	negative regulation of histone methylation	biological_process	0.061987	0.5552	1	259	3	12231	FBgn0261573
GO:0061085	regulation of histone H3-K27 methylation	biological_process	0.061987	0.5552	1	259	3	12231	FBgn0261573
GO:0090239	regulation of histone H4 acetylation	biological_process	0.061987	0.5552	1	259	3	12231	FBgn0261573
GO:0060048	cardiac muscle contraction	biological_process	0.062029	0.5552	1	259	3	12231	FBgn0033494
GO:0035311	wing cell fate specification	biological_process	0.062034	0.5552	1	259	3	12231	FBgn0004635
GO:0035638	signal maturation	biological_process	0.062034	0.5552	1	259	3	12231	FBgn0004635
GO:1903055	positive regulation of extracellular matrix organization	biological_process	0.062064	0.5552	1	259	3	12231	FBgn0032252
GO:2000738	positive regulation of stem cell differentiation	biological_process	0.062128	0.5552	1	259	3	12231	FBgn0000114
GO:0001103	RNA polymerase II repressing transcription factor binding	molecular_function	0.062152	0.5552	1	259	3	12231	FBgn0003117
GO:0008036	diuretic hormone receptor activity	molecular_function	0.062155	0.5552	1	259	3	12231	FBgn0052843
GO:0008611	ether lipid biosynthetic process	biological_process	0.062163	0.5552	1	259	3	12231	FBgn0034145
GO:0010888	negative regulation of lipid storage	biological_process	0.062163	0.5552	1	259	3	12231	FBgn0038197
GO:0034720	histone H3-K4 demethylation	biological_process	0.062163	0.5552	1	259	3	12231	FBgn0260397
GO:0046485	ether lipid metabolic process	biological_process	0.062163	0.5552	1	259	3	12231	FBgn0034145
GO:0046504	glycerol ether biosynthetic process	biological_process	0.062163	0.5552	1	259	3	12231	FBgn0034145
GO:0097384	cellular lipid biosynthetic process	biological_process	0.062163	0.5552	1	259	3	12231	FBgn0034145
GO:1901503	ether biosynthetic process	biological_process	0.062163	0.5552	1	259	3	12231	FBgn0034145
GO:0008093	cytoskeletal adaptor activity	molecular_function	0.062163	0.5552	1	259	3	12231	FBgn0052082
GO:0015347	sodium-independent organic anion transmembrane transporter activity	molecular_function	0.062163	0.5552	1	259	3	12231	FBgn0036732
GO:0042805	actinin binding	molecular_function	0.062163	0.5552	1	259	3	12231	FBgn0265991
GO:0051393	alpha-actinin binding	molecular_function	0.062163	0.5552	1	259	3	12231	FBgn0265991
GO:0010026	trichome differentiation	biological_process	0.062163	0.5552	1	259	3	12231	FBgn0264272
GO:0010090	trichome morphogenesis	biological_process	0.062163	0.5552	1	259	3	12231	FBgn0264272
GO:0048366	leaf development	biological_process	0.062163	0.5552	1	259	3	12231	FBgn0264272
GO:0048367	shoot system development	biological_process	0.062163	0.5552	1	259	3	12231	FBgn0264272
GO:0048827	phyllome development	biological_process	0.062163	0.5552	1	259	3	12231	FBgn0264272
GO:0048831	regulation of shoot system development	biological_process	0.062163	0.5552	1	259	3	12231	FBgn0264272
GO:0090558	plant epidermis development	biological_process	0.062163	0.5552	1	259	3	12231	FBgn0264272
GO:0090626	plant epidermis morphogenesis	biological_process	0.062163	0.5552	1	259	3	12231	FBgn0264272
GO:2000024	regulation of leaf development	biological_process	0.062163	0.5552	1	259	3	12231	FBgn0264272
GO:2000039	regulation of trichome morphogenesis	biological_process	0.062163	0.5552	1	259	3	12231	FBgn0264272
GO:0030950	establishment or maintenance of actin cytoskeleton polarity	biological_process	0.062163	0.5552	1	259	3	12231	FBgn0085408
GO:0042249	establishment of planar polarity of embryonic epithelium	biological_process	0.062163	0.5552	1	259	3	12231	FBgn0085408
GO:0090251	protein localization involved in establishment of planar polarity	biological_process	0.062163	0.5552	1	259	3	12231	FBgn0085408
GO:0005452	inorganic anion exchanger activity	molecular_function	0.062163	0.5552	1	259	3	12231	FBgn0259111
GO:0015677	copper ion import	biological_process	0.062163	0.5552	1	259	3	12231	FBgn0020307
GO:0097150	neuronal stem cell population maintenance	biological_process	0.062163	0.5552	1	259	3	12231	FBgn0013469
GO:2000035	regulation of stem cell division	biological_process	0.062163	0.5552	1	259	3	12231	FBgn0013469
GO:0000146	microfilament motor activity	molecular_function	0.062163	0.5552	1	259	3	12231	FBgn0264695
GO:0004176	ATP-dependent peptidase activity	molecular_function	0.062163	0.5552	1	259	3	12231	FBgn0052369
GO:0004716	receptor signaling protein tyrosine kinase activity	molecular_function	0.062163	0.5552	1	259	3	12231	FBgn0033791
GO:0008291	acetylcholine metabolic process	biological_process	0.062163	0.5552	1	259	3	12231	FBgn0000024
GO:0008359	regulation of bicoid mRNA localization	biological_process	0.062163	0.5552	1	259	3	12231	FBgn0262975
GO:0008449	N-acetylglucosamine-6-sulfatase activity	molecular_function	0.062163	0.5552	1	259	3	12231	FBgn0040271
GO:0008504	monoamine transmembrane transporter activity	molecular_function	0.062163	0.5552	1	259	3	12231	FBgn0260964
GO:0018027	peptidyl-lysine dimethylation	biological_process	0.062163	0.5552	1	259	3	12231	FBgn0025639
GO:0030159	receptor signaling complex scaffold activity	molecular_function	0.062163	0.5552	1	259	3	12231	FBgn0040752
GO:0030898	actin-dependent ATPase activity	molecular_function	0.062163	0.5552	1	259	3	12231	FBgn0264695
GO:0032368	regulation of lipid transport	biological_process	0.062163	0.5552	1	259	3	12231	FBgn0041111
GO:0036059	nephrocyte diaphragm assembly	biological_process	0.062163	0.5552	1	259	3	12231	FBgn0028369
GO:0042799	histone methyltransferase activity (H4-K20 specific)	molecular_function	0.062163	0.5552	1	259	3	12231	FBgn0025639
GO:0046683	response to organophosphorus	biological_process	0.062163	0.5552	1	259	3	12231	FBgn0000024
GO:0046956	positive phototaxis	biological_process	0.062163	0.5552	1	259	3	12231	FBgn0001624
GO:0052128	positive energy taxis	biological_process	0.062163	0.5552	1	259	3	12231	FBgn0001624
GO:1900619	acetate ester metabolic process	biological_process	0.062163	0.5552	1	259	3	12231	FBgn0000024
GO:0004435	phosphatidylinositol phospholipase C activity	molecular_function	0.062163	0.5552	1	259	3	12231	FBgn0262738
GO:0004629	phospholipase C activity	molecular_function	0.062163	0.5552	1	259	3	12231	FBgn0262738
GO:0030507	spectrin binding	molecular_function	0.062163	0.5552	1	259	3	12231	FBgn0259685
GO:0031233	intrinsic component of external side of plasma membrane	cellular_component	0.062163	0.5552	1	259	3	12231	FBgn0262869
GO:0032845	negative regulation of homeostatic process	biological_process	0.062163	0.5552	1	259	3	12231	FBgn0262738
GO:0032992	protein-carbohydrate complex	cellular_component	0.062163	0.5552	1	259	3	12231	FBgn0264089
GO:0033109	cortical actin cytoskeleton stabilization	biological_process	0.062163	0.5552	1	259	3	12231	FBgn0086901
GO:0044070	regulation of anion transport	biological_process	0.062163	0.5552	1	259	3	12231	FBgn0263397
GO:0046339	diacylglycerol metabolic process	biological_process	0.062163	0.5552	1	259	3	12231	FBgn0262738
GO:0048058	compound eye corneal lens development	biological_process	0.062163	0.5552	1	259	3	12231	FBgn0004449
GO:0050699	WW domain binding	molecular_function	0.062163	0.5552	1	259	3	12231	FBgn0260003
GO:0050913	sensory perception of bitter taste	biological_process	0.062163	0.5552	1	259	3	12231	FBgn0262738
GO:0051283	negative regulation of sequestering of calcium ion	biological_process	0.062163	0.5552	1	259	3	12231	FBgn0262738
GO:0061541	rhabdomere morphogenesis	biological_process	0.062163	0.5552	1	259	3	12231	FBgn0259685
GO:1900244	positive regulation of synaptic vesicle endocytosis	biological_process	0.062163	0.5552	1	259	3	12231	FBgn0038975
GO:1903423	positive regulation of synaptic vesicle recycling	biological_process	0.062163	0.5552	1	259	3	12231	FBgn0038975
GO:0030537	larval behavior	biological_process	0.062245	0.5552	3	259	43	12231	FBgn0013469,FBgn0003392,FBgn0010575
GO:0051270	regulation of cellular component movement	biological_process	0.062245	0.5552	3	259	43	12231	FBgn0264089,FBgn0261563,FBgn0264693
GO:0022416	chaeta development	biological_process	0.062874	0.5603	5	259	101	12231	FBgn0000413,FBgn0010470,FBgn0004449,FBgn0003117,FBgn0005636
GO:0043484	regulation of RNA splicing	biological_process	0.06324	0.56305	4	259	71	12231	FBgn0039920,FBgn0267791,FBgn0004587,FBgn0000114
GO:0071363	cellular response to growth factor stimulus	biological_process	0.063388	0.56386	4	259	71	12231	FBgn0003117,FBgn0040271,FBgn0020299,FBgn0039932
GO:0043227	membrane-bounded organelle	cellular_component	0.063476	0.56412	82	259	3336	12231	FBgn0016694,FBgn0004606,FBgn0004795,FBgn0004587,FBgn0041723,FBgn0261723,FBgn0001319,FBgn0039932,FBgn0086613,FBgn0259170,FBgn0004509,FBgn0263974,FBgn0262477,FBgn0034145,FBgn0267791,FBgn0001139,FBgn0038826,FBgn0020309,FBgn0260964,FBgn0019650,FBgn0004859,FBgn0051612,FBgn0032388,FBgn0264442,FBgn0000413,FBgn0004878,FBgn0262975,FBgn0010470,FBgn0004635,FBgn0040318,FBgn0005636,FBgn0023091,FBgn0263772,FBg…
GO:0005700	polytene chromosome	cellular_component	0.064534	0.573	7	259	167	12231	FBgn0004587,FBgn0005624,FBgn0025639,FBgn0086613,FBgn0264490,FBgn0264695,FBgn0262975
GO:0042592	homeostatic process	biological_process	0.06504	0.57697	10	259	273	12231	FBgn0034070,FBgn0262738,FBgn0259685,FBgn0032151,FBgn0265356,FBgn0041092,FBgn0010470,FBgn0086901,FBgn0260003,FBgn0004635
GO:0015296	anion:cation symporter activity	molecular_function	0.065752	0.58173	3	259	44	12231	FBgn0038652,FBgn0034911,FBgn0259111
GO:0035770	ribonucleoprotein granule	cellular_component	0.06579	0.58173	3	259	44	12231	FBgn0000114,FBgn0263974,FBgn0038826
GO:0044719	regulation of imaginal disc-derived wing size	biological_process	0.066016	0.58173	2	259	20	12231	FBgn0005630,FBgn0264442
GO:1901989	positive regulation of cell cycle phase transition	biological_process	0.066016	0.58173	2	259	20	12231	FBgn0004859,FBgn0000114
GO:1901992	positive regulation of mitotic cell cycle phase transition	biological_process	0.066016	0.58173	2	259	20	12231	FBgn0000114,FBgn0004859
GO:0005925	focal adhesion	cellular_component	0.066026	0.58173	2	259	20	12231	FBgn0033504,FBgn0000244
GO:0046668	regulation of retinal cell programmed cell death	biological_process	0.066026	0.58173	2	259	20	12231	FBgn0262738,FBgn0013469
GO:0070848	response to growth factor	biological_process	0.066053	0.58173	4	259	72	12231	FBgn0040271,FBgn0020299,FBgn0039932,FBgn0003117
GO:0050684	regulation of mRNA processing	biological_process	0.068621	0.6038	4	259	73	12231	FBgn0039920,FBgn0267791,FBgn0004587,FBgn0000114
GO:0045995	regulation of embryonic development	biological_process	0.068787	0.60472	4	259	73	12231	FBgn0023172,FBgn0262975,FBgn0261563,FBgn0039704
GO:0006955	immune response	biological_process	0.068967	0.60576	10	259	276	12231	FBgn0259099,FBgn0262738,FBgn0034070,FBgn0028990,FBgn0001319,FBgn0025936,FBgn0003117,FBgn0005630,FBgn0264707,FBgn0004606
GO:0034249	negative regulation of cellular amide metabolic process	biological_process	0.069432	0.6088	3	259	45	12231	FBgn0264001,FBgn0000182,FBgn0000114
GO:0043235	receptor complex	cellular_component	0.069438	0.6088	3	259	45	12231	FBgn0041092,FBgn0000036,FBgn0032151
GO:0050807	regulation of synapse organization	biological_process	0.069695	0.6105	5	259	104	12231	FBgn0264607,FBgn0001624,FBgn0011817,FBgn0038975,FBgn0263111
GO:0005576	extracellular region	cellular_component	0.070324	0.61546	26	259	908	12231	FBgn0085249,FBgn0264089,FBgn0031903,FBgn0010470,FBgn0263132,FBgn0051619,FBgn0028645,FBgn0039054,FBgn0029791,FBgn0041604,FBgn0038126,FBgn0032252,FBgn0000299,FBgn0022770,FBgn0039928,FBgn0000108,FBgn0004449,FBgn0038498,FBgn0051439,FBgn0261451,FBgn0004360,FBgn0037487,FBgn0264815,FBgn0261563,FBgn0034070,FBgn0028990
GO:1903311	regulation of mRNA metabolic process	biological_process	0.071397	0.6243	4	259	74	12231	FBgn0267791,FBgn0039920,FBgn0004587,FBgn0000114
GO:0015075	ion transmembrane transporter activity	molecular_function	0.071505	0.62468	18	259	585	12231	FBgn0038652,FBgn0032151,FBgn0038837,FBgn0033494,FBgn0034911,FBgn0259145,FBgn0264908,FBgn0032593,FBgn0028704,FBgn0000036,FBgn0030707,FBgn0259111,FBgn0036732,FBgn0051634,FBgn0263111,FBgn0263397,FBgn0259822,FBgn0013995
GO:0005249	voltage-gated potassium channel activity	molecular_function	0.071948	0.62721	2	259	21	12231	FBgn0033494,FBgn0263397
GO:0006171	cAMP biosynthetic process	biological_process	0.071982	0.62721	2	259	21	12231	FBgn0260753,FBgn0038197
GO:0022407	regulation of cell-cell adhesion	biological_process	0.071987	0.62721	2	259	21	12231	FBgn0264089,FBgn0001624
GO:0035151	regulation of tube size, open tracheal system	biological_process	0.073018	0.63562	3	259	46	12231	FBgn0001075,FBgn0000497,FBgn0001320
GO:0018958	phenol-containing compound metabolic process	biological_process	0.07428	0.64603	4	259	75	12231	FBgn0264707,FBgn0028990,FBgn0025936,FBgn0259099
GO:0005085	guanyl-nucleotide exchange factor activity	molecular_function	0.074411	0.6466	4	259	75	12231	FBgn0262562,FBgn0263706,FBgn0264707,FBgn0023172
GO:0008324	cation transmembrane transporter activity	molecular_function	0.075912	0.65905	13	259	394	12231	FBgn0028704,FBgn0013995,FBgn0032593,FBgn0259822,FBgn0263397,FBgn0259145,FBgn0263111,FBgn0034911,FBgn0033494,FBgn0259111,FBgn0032151,FBgn0000036,FBgn0038652
GO:0010160	formation of organ boundary	biological_process	0.076965	0.66663	3	259	47	12231	FBgn0264089,FBgn0004635,FBgn0013469
GO:0045787	positive regulation of cell cycle	biological_process	0.076983	0.66663	3	259	47	12231	FBgn0020309,FBgn0004859,FBgn0000114
GO:0046843	dorsal appendage formation	biological_process	0.07699	0.66663	3	259	47	12231	FBgn0003392,FBgn0014343,FBgn0038826
GO:0050795	regulation of behavior	biological_process	0.077302	0.6681	4	259	76	12231	FBgn0038197,FBgn0263397,FBgn0266418,FBgn0260753
GO:0001227	transcriptional repressor activity, RNA polymerase II transcription regulatory region sequence-specific binding	molecular_function	0.077781	0.6681	2	259	22	12231	FBgn0001320,FBgn0261963
GO:0035327	transcriptionally active chromatin	cellular_component	0.078004	0.6681	2	259	22	12231	FBgn0004587,FBgn0264490
GO:0007432	salivary gland boundary specification	biological_process	0.078075	0.6681	2	259	22	12231	FBgn0264089,FBgn0004635
GO:0007449	proximal/distal pattern formation, imaginal disc	biological_process	0.078075	0.6681	2	259	22	12231	FBgn0005677,FBgn0004635
GO:0045433	male courtship behavior, veined wing generated song production	biological_process	0.078105	0.6681	2	259	22	12231	FBgn0262477,FBgn0263111
GO:0043954	cellular component maintenance	biological_process	0.078114	0.6681	2	259	22	12231	FBgn0259685,FBgn0003392
GO:0016056	rhodopsin mediated signaling pathway	biological_process	0.078114	0.6681	2	259	22	12231	FBgn0262738,FBgn0259234
GO:0035186	syncytial blastoderm mitotic cell cycle	biological_process	0.078114	0.6681	2	259	22	12231	FBgn0005624,FBgn0015600
GO:0045187	regulation of circadian sleep/wake cycle, sleep	biological_process	0.078114	0.6681	2	259	22	12231	FBgn0266418,FBgn0263397
GO:0008061	chitin binding	molecular_function	0.078792	0.6681	5	259	108	12231	FBgn0037487,FBgn0263132,FBgn0085249,FBgn0022770,FBgn0051439
GO:0045664	regulation of neuron differentiation	biological_process	0.079083	0.6681	5	259	108	12231	FBgn0023172,FBgn0029157,FBgn0045852,FBgn0001319,FBgn0086901
GO:0044087	regulation of cellular component biogenesis	biological_process	0.079807	0.6681	8	259	211	12231	FBgn0032252,FBgn0264272,FBgn0011817,FBgn0001624,FBgn0029157,FBgn0263111,FBgn0262975,FBgn0264607
GO:0008587	imaginal disc-derived wing margin morphogenesis	biological_process	0.080515	0.6681	3	259	48	12231	FBgn0000244,FBgn0041604,FBgn0010470
GO:0015079	potassium ion transmembrane transporter activity	molecular_function	0.080869	0.6681	3	259	48	12231	FBgn0033494,FBgn0263397,FBgn0028704
GO:0008407	chaeta morphogenesis	biological_process	0.08089	0.6681	3	259	48	12231	FBgn0000413,FBgn0005636,FBgn0003117
GO:0017077	oxidative phosphorylation uncoupler activity	molecular_function	0.080972	0.6681	1	259	4	12231	FBgn0030872
GO:0004890	GABA-A receptor activity	molecular_function	0.081115	0.6681	1	259	4	12231	FBgn0030707
GO:0035062	omega speckle	cellular_component	0.081143	0.6681	1	259	4	12231	FBgn0267791
GO:0015629	actin cytoskeleton	cellular_component	0.081502	0.6681	5	259	109	12231	FBgn0029881,FBgn0267727,FBgn0023172,FBgn0085408,FBgn0264695
GO:0002793	positive regulation of peptide secretion	biological_process	0.081599	0.6681	1	259	4	12231	FBgn0023091
GO:0046887	positive regulation of hormone secretion	biological_process	0.081599	0.6681	1	259	4	12231	FBgn0023091
GO:0006273	lagging strand elongation	biological_process	0.081801	0.6681	1	259	4	12231	FBgn0038035
GO:0016011	dystroglycan complex	cellular_component	0.081802	0.6681	1	259	4	12231	FBgn0025391
GO:0031057	negative regulation of histone modification	biological_process	0.081844	0.6681	1	259	4	12231	FBgn0261573
GO:0035202	tracheal pit formation in open tracheal system	biological_process	0.08189	0.6681	1	259	4	12231	FBgn0004635
GO:1903053	regulation of extracellular matrix organization	biological_process	0.08192	0.6681	1	259	4	12231	FBgn0032252
GO:0008056	ocellus development	biological_process	0.081985	0.6681	1	259	4	12231	FBgn0019650
GO:0001106	RNA polymerase II transcription corepressor activity	molecular_function	0.082008	0.6681	1	259	4	12231	FBgn0001139
GO:0090090	negative regulation of canonical Wnt signaling pathway	biological_process	0.082008	0.6681	1	259	4	12231	FBgn0001139
GO:0043487	regulation of RNA stability	biological_process	0.082011	0.6681	1	259	4	12231	FBgn0039260
GO:0007429	secondary branching, open tracheal system	biological_process	0.082015	0.6681	1	259	4	12231	FBgn0003118
GO:2001234	negative regulation of apoptotic signaling pathway	biological_process	0.082015	0.6681	1	259	4	12231	FBgn0003118
GO:0032925	regulation of activin receptor signaling pathway	biological_process	0.082017	0.6681	1	259	4	12231	FBgn0038197
GO:1900078	positive regulation of cellular response to insulin stimulus	biological_process	0.082017	0.6681	1	259	4	12231	FBgn0038197
GO:0005237	inhibitory extracellular ligand-gated ion channel activity	molecular_function	0.082017	0.6681	1	259	4	12231	FBgn0264908
GO:0016934	extracellular-glycine-gated chloride channel activity	molecular_function	0.082017	0.6681	1	259	4	12231	FBgn0264908
GO:0016935	glycine-gated chloride channel complex	cellular_component	0.082017	0.6681	1	259	4	12231	FBgn0264908
GO:0005923	bicellular tight junction	cellular_component	0.082017	0.6681	1	259	4	12231	FBgn0085408
GO:0007229	integrin-mediated signaling pathway	biological_process	0.082017	0.6681	1	259	4	12231	FBgn0260660
GO:0022606	establishment of proximal/distal cell polarity	biological_process	0.082017	0.6681	1	259	4	12231	FBgn0264272
GO:0035320	imaginal disc-derived wing hair site selection	biological_process	0.082017	0.6681	1	259	4	12231	FBgn0264272
GO:0071896	protein localization to adherens junction	biological_process	0.082017	0.6681	1	259	4	12231	FBgn0085408
GO:1902414	protein localization to cell junction	biological_process	0.082017	0.6681	1	259	4	12231	FBgn0085408
GO:0000235	astral microtubule	cellular_component	0.082017	0.6681	1	259	4	12231	FBgn0019968
GO:0003151	outflow tract morphogenesis	biological_process	0.082017	0.6681	1	259	4	12231	FBgn0264089
GO:0004896	cytokine receptor activity	molecular_function	0.082017	0.6681	1	259	4	12231	FBgn0262869
GO:0005826	actomyosin contractile ring	cellular_component	0.082017	0.6681	1	259	4	12231	FBgn0023172
GO:0005917	nephrocyte diaphragm	cellular_component	0.082017	0.6681	1	259	4	12231	FBgn0028369
GO:0007375	anterior midgut invagination	biological_process	0.082017	0.6681	1	259	4	12231	FBgn0023172
GO:0017071	intracellular cyclic nucleotide activated cation channel complex	cellular_component	0.082017	0.6681	1	259	4	12231	FBgn0259145
GO:0030241	skeletal muscle myosin thick filament assembly	biological_process	0.082017	0.6681	1	259	4	12231	FBgn0264695
GO:0030374	ligand-dependent nuclear receptor transcription coactivator activity	molecular_function	0.082017	0.6681	1	259	4	12231	FBgn0041092
GO:0030709	border follicle cell delamination	biological_process	0.082017	0.6681	1	259	4	12231	FBgn0001624
GO:0032528	microvillus organization	biological_process	0.082017	0.6681	1	259	4	12231	FBgn0039709
GO:0032947	protein complex scaffold	molecular_function	0.082017	0.6681	1	259	4	12231	FBgn0040752
GO:0034770	histone H4-K20 methylation	biological_process	0.082017	0.6681	1	259	4	12231	FBgn0025639
GO:0035211	spermathecum morphogenesis	biological_process	0.082017	0.6681	1	259	4	12231	FBgn0005677
GO:0035217	labial disc development	biological_process	0.082017	0.6681	1	259	4	12231	FBgn0004859
GO:0035257	nuclear hormone receptor binding	molecular_function	0.082017	0.6681	1	259	4	12231	FBgn0041092
GO:0035301	Hedgehog signaling complex	cellular_component	0.082017	0.6681	1	259	4	12231	FBgn0004859
GO:0035385	Roundabout signaling pathway	biological_process	0.082017	0.6681	1	259	4	12231	FBgn0264089
GO:0036056	filtration diaphragm	cellular_component	0.082017	0.6681	1	259	4	12231	FBgn0028369
GO:0036058	filtration diaphragm assembly	biological_process	0.082017	0.6681	1	259	4	12231	FBgn0028369
GO:0045117	azole transport	biological_process	0.082017	0.6681	1	259	4	12231	FBgn0260964
GO:0051018	protein kinase A binding	molecular_function	0.082017	0.6681	1	259	4	12231	FBgn0266098
GO:0051282	regulation of sequestering of calcium ion	biological_process	0.082017	0.6681	1	259	4	12231	FBgn0262738
GO:0051482	positive regulation of cytosolic calcium ion concentration involved in phospholipase C-activating G-protein coupled signaling pathway	biological_process	0.082017	0.6681	1	259	4	12231	FBgn0262738
GO:0071526	semaphorin-plexin signaling pathway	biological_process	0.082017	0.6681	1	259	4	12231	FBgn0261451
GO:0071688	striated muscle myosin thick filament assembly	biological_process	0.082017	0.6681	1	259	4	12231	FBgn0264695
GO:1902805	positive regulation of synaptic vesicle transport	biological_process	0.082017	0.6681	1	259	4	12231	FBgn0038975
GO:0015145	monosaccharide transmembrane transporter activity	molecular_function	0.083639	0.68075	2	259	23	12231	FBgn0034247,FBgn0037387
GO:0016835	carbon-oxygen lyase activity	molecular_function	0.084367	0.68294	3	259	49	12231	FBgn0027844,FBgn0052698,FBgn0030056
GO:0016545	male courtship behavior, veined wing vibration	biological_process	0.084389	0.68294	2	259	23	12231	FBgn0262477,FBgn0263111
GO:0007398	ectoderm development	biological_process	0.084394	0.68294	2	259	23	12231	FBgn0003117,FBgn0003499
GO:0006898	receptor-mediated endocytosis	biological_process	0.084398	0.68294	2	259	23	12231	FBgn0003392,FBgn0004885
GO:0009453	energy taxis	biological_process	0.084398	0.68294	2	259	23	12231	FBgn0000024,FBgn0001624
GO:0042331	phototaxis	biological_process	0.084398	0.68294	2	259	23	12231	FBgn0000024,FBgn0001624
GO:0043269	regulation of ion transport	biological_process	0.084398	0.68294	2	259	23	12231	FBgn0263397,FBgn0037766
GO:0008654	phospholipid biosynthetic process	biological_process	0.084735	0.68511	3	259	49	12231	FBgn0262738,FBgn0032955,FBgn0085390
GO:0048103	somatic stem cell division	biological_process	0.084885	0.68518	3	259	49	12231	FBgn0261451,FBgn0001624,FBgn0004606
GO:0014902	myotube differentiation	biological_process	0.084885	0.68518	3	259	49	12231	FBgn0028369,FBgn0264693,FBgn0038197
GO:1902578	single-organism localization	biological_process	0.085206	0.6872	41	259	1565	12231	FBgn0259685,FBgn0030707,FBgn0037766,FBgn0003499,FBgn0000036,FBgn0263397,FBgn0260003,FBgn0013995,FBgn0051634,FBgn0001624,FBgn0264490,FBgn0015919,FBgn0033494,FBgn0032151,FBgn0003392,FBgn0003118,FBgn0038652,FBgn0023091,FBgn0261090,FBgn0028704,FBgn0032593,FBgn0019968,FBgn0262975,FBgn0030872,FBgn0267727,FBgn0038975,FBgn0259111,FBgn0036732,FBgn0041111,FBgn0037387,FBgn0020307,FBgn0260964,FBgn0259822,FBg…
GO:0051240	positive regulation of multicellular organismal process	biological_process	0.085415	0.68832	6	259	144	12231	FBgn0263397,FBgn0013469,FBgn0266418,FBgn0263111,FBgn0011817,FBgn0001624
GO:0051094	positive regulation of developmental process	biological_process	0.087609	0.70542	6	259	145	12231	FBgn0001624,FBgn0011817,FBgn0263111,FBgn0004859,FBgn0013469,FBgn0000114
GO:0002682	regulation of immune system process	biological_process	0.087959	0.70765	7	259	180	12231	FBgn0028990,FBgn0085432,FBgn0034070,FBgn0003118,FBgn0003117,FBgn0038197,FBgn0001319
GO:0051640	organelle localization	biological_process	0.088508	0.71149	8	259	216	12231	FBgn0003392,FBgn0260964,FBgn0261090,FBgn0019968,FBgn0262975,FBgn0264693,FBgn0001624,FBgn0038975
GO:0035150	regulation of tube size	biological_process	0.08879	0.71317	3	259	50	12231	FBgn0000497,FBgn0001075,FBgn0001320
GO:0048568	embryonic organ development	biological_process	0.0889	0.71346	3	259	50	12231	FBgn0261963,FBgn0003117,FBgn0264089
GO:0008301	DNA binding, bending	molecular_function	0.090585	0.72478	2	259	24	12231	FBgn0024288,FBgn0038197
GO:0048065	male courtship behavior, veined wing extension	biological_process	0.09082	0.72478	2	259	24	12231	FBgn0262477,FBgn0263111
GO:0016334	establishment or maintenance of polarity of follicular epithelium	biological_process	0.090829	0.72478	2	259	24	12231	FBgn0001624,FBgn0259685
GO:0022410	circadian sleep/wake cycle process	biological_process	0.090829	0.72478	2	259	24	12231	FBgn0266418,FBgn0263397
GO:0030334	regulation of cell migration	biological_process	0.090829	0.72478	2	259	24	12231	FBgn0264089,FBgn0261563
GO:0050802	circadian sleep/wake cycle, sleep	biological_process	0.090829	0.72478	2	259	24	12231	FBgn0266418,FBgn0263397
GO:2000145	regulation of cell motility	biological_process	0.090829	0.72478	2	259	24	12231	FBgn0264089,FBgn0261563
GO:0046914	transition metal ion binding	molecular_function	0.091176	0.72695	24	259	851	12231	FBgn0000108,FBgn0001320,FBgn0000448,FBgn0265356,FBgn0052369,FBgn0027844,FBgn0260003,FBgn0003117,FBgn0250819,FBgn0001138,FBgn0032252,FBgn0035849,FBgn0265991,FBgn0004914,FBgn0004885,FBgn0051619,FBgn0005636,FBgn0039920,FBgn0005624,FBgn0015032,FBgn0029791,FBgn0263772,FBgn0263974,FBgn0050147
GO:0003712	transcription cofactor activity	molecular_function	0.091373	0.72793	5	259	113	12231	FBgn0013531,FBgn0261573,FBgn0001139,FBgn0041092,FBgn0010575
GO:1901700	response to oxygen-containing compound	biological_process	0.092037	0.73262	8	259	218	12231	FBgn0028990,FBgn0025631,FBgn0000210,FBgn0264490,FBgn0000479,FBgn0038197,FBgn0004635,FBgn0000024
GO:0044089	positive regulation of cellular component biogenesis	biological_process	0.092579	0.73634	4	259	81	12231	FBgn0032252,FBgn0263111,FBgn0001624,FBgn0011817
GO:0019725	cellular homeostasis	biological_process	0.094168	0.74836	6	259	148	12231	FBgn0265356,FBgn0034070,FBgn0010470,FBgn0262738,FBgn0260003,FBgn0032151
GO:0042063	gliogenesis	biological_process	0.095804	0.75959	4	259	82	12231	FBgn0004795,FBgn0264089,FBgn0025631,FBgn0004878
GO:0006417	regulation of translation	biological_process	0.095808	0.75959	4	259	82	12231	FBgn0264001,FBgn0000182,FBgn0000114,FBgn0038826
GO:0007369	gastrulation	biological_process	0.095814	0.75959	4	259	82	12231	FBgn0023172,FBgn0020299,FBgn0085432,FBgn0264089
GO:0006414	translational elongation	biological_process	0.097298	0.76532	2	259	25	12231	FBgn0000557,FBgn0000559
GO:0045214	sarcomere organization	biological_process	0.097328	0.76532	2	259	25	12231	FBgn0264695,FBgn0025391
GO:0017053	transcriptional repressor complex	cellular_component	0.097341	0.76532	2	259	25	12231	FBgn0260397,FBgn0261573
GO:0008016	regulation of heart contraction	biological_process	0.097355	0.76532	2	259	25	12231	FBgn0263111,FBgn0033494
GO:1903522	regulation of blood circulation	biological_process	0.097355	0.76532	2	259	25	12231	FBgn0033494,FBgn0263111
GO:0007426	tracheal outgrowth, open tracheal system	biological_process	0.097398	0.76532	2	259	25	12231	FBgn0020299,FBgn0003118
GO:0007469	antennal development	biological_process	0.097399	0.76532	2	259	25	12231	FBgn0005677,FBgn0003382
GO:0019992	diacylglycerol binding	molecular_function	0.097399	0.76532	2	259	25	12231	FBgn0023172,FBgn0263980
GO:0050821	protein stabilization	biological_process	0.097399	0.76532	2	259	25	12231	FBgn0259685,FBgn0264695
GO:0051293	establishment of spindle localization	biological_process	0.097399	0.76532	2	259	25	12231	FBgn0001624,FBgn0019968
GO:0051653	spindle localization	biological_process	0.097399	0.76532	2	259	25	12231	FBgn0019968,FBgn0001624
GO:0010623	developmental programmed cell death	biological_process	0.099058	0.76752	6	259	150	12231	FBgn0262738,FBgn0013469,FBgn0000210,FBgn0003392,FBgn0005630,FBgn0264490
GO:0072089	stem cell proliferation	biological_process	0.099085	0.76752	4	259	83	12231	FBgn0261451,FBgn0013469,FBgn0001624,FBgn0085432
GO:0016722	oxidoreductase activity, oxidizing metal ions	molecular_function	0.10102	0.76752	1	259	5	12231	FBgn0034067
GO:0004767	sphingomyelin phosphodiesterase activity	molecular_function	0.10105	0.76752	1	259	5	12231	FBgn0044328
GO:0005853	eukaryotic translation elongation factor 1 complex	cellular_component	0.10124	0.76752	1	259	5	12231	FBgn0000557
GO:0005251	delayed rectifier potassium channel activity	molecular_function	0.10132	0.76752	1	259	5	12231	FBgn0033494
GO:0016909	SAP kinase activity	molecular_function	0.10143	0.76752	1	259	5	12231	FBgn0033915
GO:0035203	regulation of lamellocyte differentiation	biological_process	0.10145	0.76752	1	259	5	12231	FBgn0001319
GO:0045613	regulation of plasmatocyte differentiation	biological_process	0.10145	0.76752	1	259	5	12231	FBgn0001319
GO:0030728	ovulation	biological_process	0.10145	0.76752	1	259	5	12231	FBgn0264607
GO:0034198	cellular response to amino acid starvation	biological_process	0.10145	0.76752	1	259	5	12231	FBgn0038197
GO:0045745	positive regulation of G-protein coupled receptor protein signaling pathway	biological_process	0.10145	0.76752	1	259	5	12231	FBgn0038197
GO:0048581	negative regulation of post-embryonic development	biological_process	0.10145	0.76752	1	259	5	12231	FBgn0038197
GO:0001948	glycoprotein binding	molecular_function	0.10145	0.76752	1	259	5	12231	FBgn0041604
GO:0004571	mannosyl-oligosaccharide 1,2-alpha-mannosidase activity	molecular_function	0.10145	0.76752	1	259	5	12231	FBgn0259170
GO:0043394	proteoglycan binding	molecular_function	0.10145	0.76752	1	259	5	12231	FBgn0041604
GO:0043395	heparan sulfate proteoglycan binding	molecular_function	0.10145	0.76752	1	259	5	12231	FBgn0041604
GO:0001764	neuron migration	biological_process	0.10145	0.76752	1	259	5	12231	FBgn0264089
GO:0003680	AT DNA binding	molecular_function	0.10145	0.76752	1	259	5	12231	FBgn0020307
GO:0004993	serotonin receptor activity	molecular_function	0.10145	0.76752	1	259	5	12231	FBgn0261929
GO:0005080	protein kinase C binding	molecular_function	0.10145	0.76752	1	259	5	12231	FBgn0259685
GO:0005283	sodium:amino acid symporter activity	molecular_function	0.10145	0.76752	1	259	5	12231	FBgn0034911
GO:0005605	basal lamina	cellular_component	0.10145	0.76752	1	259	5	12231	FBgn0261563
GO:0005955	calcineurin complex	cellular_component	0.10145	0.76752	1	259	5	12231	FBgn0011826
GO:0007210	serotonin receptor signaling pathway	biological_process	0.10145	0.76752	1	259	5	12231	FBgn0261929
GO:0007374	posterior midgut invagination	biological_process	0.10145	0.76752	1	259	5	12231	FBgn0023172
GO:0007500	mesodermal cell fate determination	biological_process	0.10145	0.76752	1	259	5	12231	FBgn0085432
GO:0008230	ecdysone receptor holocomplex	cellular_component	0.10145	0.76752	1	259	5	12231	FBgn0041092
GO:0008273	calcium, potassium:sodium antiporter activity	molecular_function	0.10145	0.76752	1	259	5	12231	FBgn0028704
GO:0015175	neutral amino acid transmembrane transporter activity	molecular_function	0.10145	0.76752	1	259	5	12231	FBgn0034911
GO:0016336	establishment or maintenance of polarity of larval imaginal disc epithelium	biological_process	0.10145	0.76752	1	259	5	12231	FBgn0001624
GO:0016363	nuclear matrix	cellular_component	0.10145	0.76752	1	259	5	12231	FBgn0003175
GO:0017017	MAP kinase tyrosine/serine/threonine phosphatase activity	molecular_function	0.10145	0.76752	1	259	5	12231	FBgn0029157
GO:0017080	sodium channel regulator activity	molecular_function	0.10145	0.76752	1	259	5	12231	FBgn0037766
GO:0030173	integral component of Golgi membrane	cellular_component	0.10145	0.76752	1	259	5	12231	FBgn0004509
GO:0031228	intrinsic component of Golgi membrane	cellular_component	0.10145	0.76752	1	259	5	12231	FBgn0004509
GO:0033549	MAP kinase phosphatase activity	molecular_function	0.10145	0.76752	1	259	5	12231	FBgn0029157
GO:0035263	genital disc sexually dimorphic development	biological_process	0.10145	0.76752	1	259	5	12231	FBgn0005677
GO:0042043	neurexin family protein binding	molecular_function	0.10145	0.76752	1	259	5	12231	FBgn0083975
GO:0045199	maintenance of epithelial cell apical/basal polarity	biological_process	0.10145	0.76752	1	259	5	12231	FBgn0261451
GO:0046460	neutral lipid biosynthetic process	biological_process	0.10145	0.76752	1	259	5	12231	FBgn0262738
GO:0046463	acylglycerol biosynthetic process	biological_process	0.10145	0.76752	1	259	5	12231	FBgn0262738
GO:0047555	3',5'-cyclic-GMP phosphodiesterase activity	molecular_function	0.10145	0.76752	1	259	5	12231	FBgn0264815
GO:0048098	antennal joint development	biological_process	0.10145	0.76752	1	259	5	12231	FBgn0005677
GO:0051180	vitamin transport	biological_process	0.10145	0.76752	1	259	5	12231	FBgn0038975
GO:0051427	hormone receptor binding	molecular_function	0.10145	0.76752	1	259	5	12231	FBgn0041092
GO:0060250	germ-line stem-cell niche homeostasis	biological_process	0.10145	0.76752	1	259	5	12231	FBgn0041092
GO:0090254	cell elongation involved in imaginal disc-derived wing morphogenesis	biological_process	0.10145	0.76752	1	259	5	12231	FBgn0023172
GO:0008284	positive regulation of cell proliferation	biological_process	0.10165	0.76842	3	259	53	12231	FBgn0003118,FBgn0013469,FBgn0259685
GO:0033043	regulation of organelle organization	biological_process	0.10301	0.77811	9	259	261	12231	FBgn0001320,FBgn0029157,FBgn0052082,FBgn0264272,FBgn0020309,FBgn0041111,FBgn0261573,FBgn0000114,FBgn0003392
GO:0009954	proximal/distal pattern formation	biological_process	0.10405	0.7839	2	259	26	12231	FBgn0004635,FBgn0005677
GO:0030048	actin filament-based movement	biological_process	0.10408	0.7839	2	259	26	12231	FBgn0039704,FBgn0023172
GO:0030674	protein binding, bridging	molecular_function	0.1041	0.7839	2	259	26	12231	FBgn0051163,FBgn0052082
GO:0033301	cell cycle comprising mitosis without cytokinesis	biological_process	0.1041	0.7839	2	259	26	12231	FBgn0015600,FBgn0005624
GO:0000989	transcription factor activity, transcription factor binding	molecular_function	0.10496	0.78979	5	259	118	12231	FBgn0010575,FBgn0041092,FBgn0013531,FBgn0261573,FBgn0001139
GO:0007480	imaginal disc-derived leg morphogenesis	biological_process	0.10578	0.79535	4	259	85	12231	FBgn0020307,FBgn0263706,FBgn0000497,FBgn0052666
GO:0045087	innate immune response	biological_process	0.10618	0.79775	6	259	153	12231	FBgn0259099,FBgn0025936,FBgn0001319,FBgn0028990,FBgn0034070,FBgn0264707
GO:0016049	cell growth	biological_process	0.10809	0.8115	5	259	119	12231	FBgn0023172,FBgn0000479,FBgn0041092,FBgn0004360,FBgn0038197
GO:0051656	establishment of organelle localization	biological_process	0.10901	0.81732	7	259	190	12231	FBgn0003392,FBgn0261090,FBgn0264693,FBgn0001624,FBgn0038975,FBgn0260964,FBgn0019968
GO:0008582	regulation of synaptic growth at neuromuscular junction	biological_process	0.1092	0.81732	4	259	86	12231	FBgn0011817,FBgn0001624,FBgn0263111,FBgn0264607
GO:1904396	regulation of neuromuscular junction development	biological_process	0.1092	0.81732	4	259	86	12231	FBgn0264607,FBgn0001624,FBgn0011817,FBgn0263111
GO:0007478	leg disc morphogenesis	biological_process	0.1092	0.81732	4	259	86	12231	FBgn0000497,FBgn0052666,FBgn0263706,FBgn0020307
GO:0005057	receptor signaling protein activity	molecular_function	0.11048	0.82321	3	259	55	12231	FBgn0033791,FBgn0011817,FBgn0033915
GO:0045824	negative regulation of innate immune response	biological_process	0.1106	0.82321	2	259	27	12231	FBgn0034070,FBgn0028990
GO:0046661	male sex differentiation	biological_process	0.11066	0.82321	2	259	27	12231	FBgn0000210,FBgn0024288
GO:0006030	chitin metabolic process	biological_process	0.1107	0.82321	5	259	120	12231	FBgn0037487,FBgn0263132,FBgn0022770,FBgn0051439,FBgn0085249
GO:0090068	positive regulation of cell cycle process	biological_process	0.11091	0.82321	2	259	27	12231	FBgn0004859,FBgn0000114
GO:0007530	sex determination	biological_process	0.11091	0.82321	2	259	27	12231	FBgn0000413,FBgn0001139
GO:0097190	apoptotic signaling pathway	biological_process	0.11092	0.82321	2	259	27	12231	FBgn0003118,FBgn0264490
GO:0060090	binding, bridging	molecular_function	0.11092	0.82321	2	259	27	12231	FBgn0051163,FBgn0052082
GO:0005876	spindle microtubule	cellular_component	0.11092	0.82321	2	259	27	12231	FBgn0015600,FBgn0019968
GO:0007603	phototransduction, visible light	biological_process	0.11092	0.82321	2	259	27	12231	FBgn0262738,FBgn0259234
GO:0035017	cuticle pattern formation	biological_process	0.11092	0.82321	2	259	27	12231	FBgn0003382,FBgn0004859
GO:0098793	presynapse	cellular_component	0.11268	0.83563	4	259	87	12231	FBgn0260964,FBgn0263111,FBgn0264607,FBgn0261090
GO:0048588	developmental cell growth	biological_process	0.11489	0.85102	3	259	56	12231	FBgn0004360,FBgn0041092,FBgn0000479
GO:0045466	R7 cell differentiation	biological_process	0.11501	0.85102	3	259	56	12231	FBgn0004449,FBgn0005630,FBgn0003118
GO:0005795	Golgi stack	cellular_component	0.11501	0.85102	3	259	56	12231	FBgn0040271,FBgn0031530,FBgn0004509
GO:0007304	chorion-containing eggshell formation	biological_process	0.11686	0.86015	5	259	122	12231	FBgn0039709,FBgn0261963,FBgn0003392,FBgn0014343,FBgn0038826
GO:0030703	eggshell formation	biological_process	0.11686	0.86015	5	259	122	12231	FBgn0003392,FBgn0038826,FBgn0014343,FBgn0039709,FBgn0261963
GO:0015081	sodium ion transmembrane transporter activity	molecular_function	0.11687	0.86015	5	259	122	12231	FBgn0038652,FBgn0259111,FBgn0034911,FBgn0013995,FBgn0028704
GO:0007297	ovarian follicle cell migration	biological_process	0.1169	0.86015	5	259	122	12231	FBgn0000182,FBgn0264695,FBgn0041092,FBgn0264442,FBgn0003392
GO:0051119	sugar transmembrane transporter activity	molecular_function	0.11701	0.86015	2	259	28	12231	FBgn0037387,FBgn0034247
GO:0005267	potassium channel activity	molecular_function	0.11781	0.86015	2	259	28	12231	FBgn0033494,FBgn0263397
GO:0005201	extracellular matrix structural constituent	molecular_function	0.11781	0.86015	2	259	28	12231	FBgn0051439,FBgn0000299
GO:0021782	glial cell development	biological_process	0.11783	0.86015	2	259	28	12231	FBgn0025631,FBgn0004878
GO:0043186	P granule	cellular_component	0.11784	0.86015	2	259	28	12231	FBgn0263974,FBgn0000114
GO:0002791	regulation of peptide secretion	biological_process	0.12008	0.86015	1	259	6	12231	FBgn0023091
GO:0006607	NLS-bearing protein import into nucleus	biological_process	0.12025	0.86015	1	259	6	12231	FBgn0267727
GO:0016886	ligase activity, forming phosphoric ester bonds	molecular_function	0.12027	0.86015	1	259	6	12231	FBgn0038035
GO:0043984	histone H4-K16 acetylation	biological_process	0.12031	0.86015	1	259	6	12231	FBgn0261573
GO:0070734	histone H3-K27 methylation	biological_process	0.12031	0.86015	1	259	6	12231	FBgn0261573
GO:0008241	peptidyl-dipeptidase activity	molecular_function	0.12046	0.86015	1	259	6	12231	FBgn0032536
GO:0005919	pleated septate junction	cellular_component	0.12047	0.86015	1	259	6	12231	FBgn0025631
GO:0035094	response to nicotine	biological_process	0.12047	0.86015	1	259	6	12231	FBgn0025631
GO:2001233	regulation of apoptotic signaling pathway	biological_process	0.12047	0.86015	1	259	6	12231	FBgn0003118
GO:0007211	octopamine or tyramine signaling pathway	biological_process	0.12048	0.86015	1	259	6	12231	FBgn0038197
GO:0032924	activin receptor signaling pathway	biological_process	0.12048	0.86015	1	259	6	12231	FBgn0038197
GO:0070076	histone lysine demethylation	biological_process	0.12048	0.86015	1	259	6	12231	FBgn0260397
GO:0034707	chloride channel complex	cellular_component	0.12048	0.86015	1	259	6	12231	FBgn0264908
GO:0002028	regulation of sodium ion transport	biological_process	0.12048	0.86015	1	259	6	12231	FBgn0037766
GO:0004723	calcium-dependent protein serine/threonine phosphatase activity	molecular_function	0.12048	0.86015	1	259	6	12231	FBgn0011826
GO:0005725	intercalary heterochromatin	cellular_component	0.12048	0.86015	1	259	6	12231	FBgn0005624
GO:0005859	muscle myosin complex	cellular_component	0.12048	0.86015	1	259	6	12231	FBgn0264695
GO:0005920	smooth septate junction	cellular_component	0.12048	0.86015	1	259	6	12231	FBgn0001624
GO:0008266	poly(U) RNA binding	molecular_function	0.12048	0.86015	1	259	6	12231	FBgn0086675
GO:0009310	amine catabolic process	biological_process	0.12048	0.86015	1	259	6	12231	FBgn0000024
GO:0010830	regulation of myotube differentiation	biological_process	0.12048	0.86015	1	259	6	12231	FBgn0028369
GO:0015464	acetylcholine receptor activity	molecular_function	0.12048	0.86015	1	259	6	12231	FBgn0000036
GO:0015893	drug transport	biological_process	0.12048	0.86015	1	259	6	12231	FBgn0260964
GO:0016200	synaptic target attraction	biological_process	0.12048	0.86015	1	259	6	12231	FBgn0004449
GO:0018023	peptidyl-lysine trimethylation	biological_process	0.12048	0.86015	1	259	6	12231	FBgn0025639
GO:0031033	myosin filament organization	biological_process	0.12048	0.86015	1	259	6	12231	FBgn0264695
GO:0031034	myosin filament assembly	biological_process	0.12048	0.86015	1	259	6	12231	FBgn0264695
GO:0042133	neurotransmitter metabolic process	biological_process	0.12048	0.86015	1	259	6	12231	FBgn0000024
GO:0042402	cellular biogenic amine catabolic process	biological_process	0.12048	0.86015	1	259	6	12231	FBgn0000024
GO:0051208	sequestering of calcium ion	biological_process	0.12048	0.86015	1	259	6	12231	FBgn0262738
GO:0051238	sequestering of metal ion	biological_process	0.12048	0.86015	1	259	6	12231	FBgn0262738
GO:0060142	regulation of syncytium formation by plasma membrane fusion	biological_process	0.12048	0.86015	1	259	6	12231	FBgn0028369
GO:0060914	heart formation	biological_process	0.12048	0.86015	1	259	6	12231	FBgn0004859
GO:0061176	type Ib terminal bouton	cellular_component	0.12048	0.86015	1	259	6	12231	FBgn0001624
GO:0070938	contractile ring	cellular_component	0.12048	0.86015	1	259	6	12231	FBgn0023172
GO:1900242	regulation of synaptic vesicle endocytosis	biological_process	0.12048	0.86015	1	259	6	12231	FBgn0038975
GO:1901739	regulation of myoblast fusion	biological_process	0.12048	0.86015	1	259	6	12231	FBgn0028369
GO:1903421	regulation of synaptic vesicle recycling	biological_process	0.12048	0.86015	1	259	6	12231	FBgn0038975
GO:2000021	regulation of ion homeostasis	biological_process	0.12048	0.86015	1	259	6	12231	FBgn0262738
GO:0015711	organic anion transport	biological_process	0.12332	0.87981	4	259	90	12231	FBgn0036732,FBgn0259111,FBgn0034911,FBgn0051634
GO:0005215	transporter activity	molecular_function	0.12404	0.88432	24	259	884	12231	FBgn0038652,FBgn0034247,FBgn0032151,FBgn0038837,FBgn0033494,FBgn0034911,FBgn0267727,FBgn0259145,FBgn0030872,FBgn0264908,FBgn0261090,FBgn0032593,FBgn0028704,FBgn0037387,FBgn0000036,FBgn0260964,FBgn0030707,FBgn0259111,FBgn0036732,FBgn0051634,FBgn0263111,FBgn0259822,FBgn0263397,FBgn0013995
GO:0060293	germ plasm	cellular_component	0.12488	0.88843	2	259	29	12231	FBgn0263974,FBgn0000114
GO:0030018	Z disc	cellular_component	0.12489	0.88843	2	259	29	12231	FBgn0265356,FBgn0265991
GO:0031674	I band	cellular_component	0.12489	0.88843	2	259	29	12231	FBgn0265356,FBgn0265991
GO:0006820	anion transport	biological_process	0.1259	0.89497	5	259	125	12231	FBgn0051634,FBgn0036732,FBgn0259111,FBgn0263397,FBgn0034911
GO:0051963	regulation of synapse assembly	biological_process	0.12705	0.90179	4	259	91	12231	FBgn0263111,FBgn0011817,FBgn0001624,FBgn0264607
GO:2000027	regulation of organ morphogenesis	biological_process	0.12705	0.90179	4	259	91	12231	FBgn0000497,FBgn0262738,FBgn0013469,FBgn0264272
GO:0044424	intracellular part	cellular_component	0.1288	0.91356	110	259	4759	12231	FBgn0020309,FBgn0029881,FBgn0038826,FBgn0027844,FBgn0025391,FBgn0001139,FBgn0265356,FBgn0264449,FBgn0051612,FBgn0261570,FBgn0004859,FBgn0086675,FBgn0019650,FBgn0260964,FBgn0265991,FBgn0266098,FBgn0086901,FBgn0001319,FBgn0261723,FBgn0041723,FBgn0004587,FBgn0004795,FBgn0004606,FBgn0016694,FBgn0267791,FBgn0034145,FBgn0263974,FBgn0262477,FBgn0004509,FBgn0259170,FBgn0264695,FBgn0085408,FBgn0039932,FBg…
GO:0034248	regulation of cellular amide metabolic process	biological_process	0.12904	0.9146	5	259	126	12231	FBgn0000114,FBgn0003117,FBgn0038826,FBgn0264001,FBgn0000182
GO:0008289	lipid binding	molecular_function	0.12945	0.91682	6	259	162	12231	FBgn0086901,FBgn0261090,FBgn0035849,FBgn0263980,FBgn0023172,FBgn0052082
GO:0022890	inorganic cation transmembrane transporter activity	molecular_function	0.13033	0.92239	10	259	314	12231	FBgn0034911,FBgn0259111,FBgn0033494,FBgn0038652,FBgn0028704,FBgn0013995,FBgn0032593,FBgn0263397,FBgn0259822,FBgn0263111
GO:0031348	negative regulation of defense response	biological_process	0.1317	0.92919	2	259	30	12231	FBgn0028990,FBgn0034070
GO:0000988	transcription factor activity, protein binding	molecular_function	0.13175	0.92919	5	259	127	12231	FBgn0001139,FBgn0013531,FBgn0261573,FBgn0010575,FBgn0041092
GO:0016199	axon midline choice point recognition	biological_process	0.13202	0.92919	2	259	30	12231	FBgn0005630,FBgn0264089
GO:0060491	regulation of cell projection assembly	biological_process	0.13203	0.92919	2	259	30	12231	FBgn0264607,FBgn0029157
GO:0014706	striated muscle tissue development	biological_process	0.13203	0.92919	2	259	30	12231	FBgn0264693,FBgn0028369
GO:0045179	apical cortex	cellular_component	0.13203	0.92919	2	259	30	12231	FBgn0023172,FBgn0001624
GO:0072091	regulation of stem cell proliferation	biological_process	0.13203	0.92919	2	259	30	12231	FBgn0085432,FBgn0013469
GO:0032269	negative regulation of cellular protein metabolic process	biological_process	0.13214	0.92919	6	259	163	12231	FBgn0028990,FBgn0261573,FBgn0264001,FBgn0000182,FBgn0000114,FBgn0259685
GO:0051248	negative regulation of protein metabolic process	biological_process	0.13214	0.92919	6	259	163	12231	FBgn0028990,FBgn0000182,FBgn0261573,FBgn0264001,FBgn0000114,FBgn0259685
GO:2000241	regulation of reproductive process	biological_process	0.13379	0.93876	3	259	60	12231	FBgn0264607,FBgn0001624,FBgn0262975
GO:0048639	positive regulation of developmental growth	biological_process	0.13379	0.93876	3	259	60	12231	FBgn0011817,FBgn0001624,FBgn0263111
GO:0044448	cell cortex part	cellular_component	0.13379	0.93876	3	259	60	12231	FBgn0023172,FBgn0001624,FBgn0085408
GO:0050906	detection of stimulus involved in sensory perception	biological_process	0.13451	0.94061	4	259	93	12231	FBgn0032593,FBgn0262738,FBgn0263111,FBgn0041604
GO:0042578	phosphoric ester hydrolase activity	molecular_function	0.13482	0.94061	7	259	201	12231	FBgn0029157,FBgn0264815,FBgn0044328,FBgn0000479,FBgn0262738,FBgn0011826,FBgn0032749
GO:0015291	secondary active transmembrane transporter activity	molecular_function	0.13502	0.94061	6	259	164	12231	FBgn0038652,FBgn0034911,FBgn0013995,FBgn0028704,FBgn0259111,FBgn0036732
GO:0005527	macrolide binding	molecular_function	0.13728	0.94061	1	259	7	12231	FBgn0010470
GO:0005528	FK506 binding	molecular_function	0.13728	0.94061	1	259	7	12231	FBgn0010470
GO:1901071	glucosamine-containing compound metabolic process	biological_process	0.13813	0.94061	5	259	129	12231	FBgn0051439,FBgn0022770,FBgn0085249,FBgn0037487,FBgn0263132
GO:0035007	regulation of melanization defense response	biological_process	0.13824	0.94061	1	259	7	12231	FBgn0028990
GO:0015144	carbohydrate transmembrane transporter activity	molecular_function	0.13838	0.94061	2	259	31	12231	FBgn0034247,FBgn0037387
GO:1901476	carbohydrate transporter activity	molecular_function	0.13838	0.94061	2	259	31	12231	FBgn0034247,FBgn0037387
GO:0005109	frizzled binding	molecular_function	0.1386	0.94061	1	259	7	12231	FBgn0004360
GO:0001763	morphogenesis of a branching structure	biological_process	0.13861	0.94061	3	259	61	12231	FBgn0004635,FBgn0020299,FBgn0003118
GO:0006814	sodium ion transport	biological_process	0.13864	0.94061	3	259	61	12231	FBgn0037766,FBgn0028704,FBgn0259111
GO:0002790	peptide secretion	biological_process	0.13871	0.94061	1	259	7	12231	FBgn0023091
GO:0009914	hormone transport	biological_process	0.13871	0.94061	1	259	7	12231	FBgn0023091
GO:0046879	hormone secretion	biological_process	0.13871	0.94061	1	259	7	12231	FBgn0023091
GO:0046883	regulation of hormone secretion	biological_process	0.13871	0.94061	1	259	7	12231	FBgn0023091
GO:0090087	regulation of peptide transport	biological_process	0.13871	0.94061	1	259	7	12231	FBgn0023091
GO:0008507	sodium:iodide symporter activity	molecular_function	0.13887	0.94061	1	259	7	12231	FBgn0038652
GO:0015373	monovalent anion:sodium symporter activity	molecular_function	0.13887	0.94061	1	259	7	12231	FBgn0038652
GO:0016805	dipeptidase activity	molecular_function	0.13896	0.94061	1	259	7	12231	FBgn0039420
GO:0010579	positive regulation of adenylate cyclase activity involved in G-protein coupled receptor signaling pathway	biological_process	0.13908	0.94061	1	259	7	12231	FBgn0260753
GO:0009997	negative regulation of cardioblast cell fate specification	biological_process	0.1391	0.94061	1	259	7	12231	FBgn0003118
GO:0051892	negative regulation of cardioblast differentiation	biological_process	0.1391	0.94061	1	259	7	12231	FBgn0003118
GO:2000044	negative regulation of cardiac cell fate specification	biological_process	0.1391	0.94061	1	259	7	12231	FBgn0003118
GO:1903706	regulation of hemopoiesis	biological_process	0.1391	0.94061	1	259	7	12231	FBgn0001319
GO:0016577	histone demethylation	biological_process	0.1391	0.94061	1	259	7	12231	FBgn0260397
GO:0016933	extracellular-glycine-gated ion channel activity	molecular_function	0.1391	0.94061	1	259	7	12231	FBgn0264908
GO:0015924	mannosyl-oligosaccharide mannosidase activity	molecular_function	0.1391	0.94061	1	259	7	12231	FBgn0259170
GO:0030837	negative regulation of actin filament polymerization	biological_process	0.1391	0.94061	1	259	7	12231	FBgn0264272
GO:0004385	guanylate kinase activity	molecular_function	0.1391	0.94061	1	259	7	12231	FBgn0001624
GO:0007050	cell cycle arrest	biological_process	0.1391	0.94061	1	259	7	12231	FBgn0029881
GO:0007366	periodic partitioning by pair rule gene	biological_process	0.1391	0.94061	1	259	7	12231	FBgn0041111
GO:0007425	epithelial cell fate determination, open tracheal system	biological_process	0.1391	0.94061	1	259	7	12231	FBgn0262139
GO:0007516	hemocyte development	biological_process	0.1391	0.94061	1	259	7	12231	FBgn0004606
GO:0014866	skeletal myofibril assembly	biological_process	0.1391	0.94061	1	259	7	12231	FBgn0264695
GO:0019933	cAMP-mediated signaling	biological_process	0.1391	0.94061	1	259	7	12231	FBgn0000479
GO:0022821	potassium ion antiporter activity	molecular_function	0.1391	0.94061	1	259	7	12231	FBgn0028704
GO:0032844	regulation of homeostatic process	biological_process	0.1391	0.94061	1	259	7	12231	FBgn0262738
GO:0035193	larval central nervous system remodeling	biological_process	0.1391	0.94061	1	259	7	12231	FBgn0000210
GO:0035371	microtubule plus-end	cellular_component	0.1391	0.94061	1	259	7	12231	FBgn0019968
GO:0043200	response to amino acid	biological_process	0.1391	0.94061	1	259	7	12231	FBgn0000024
GO:0046664	dorsal closure, amnioserosa morphology change	biological_process	0.1391	0.94061	1	259	7	12231	FBgn0259685
GO:0048104	establishment of body hair or bristle planar orientation	biological_process	0.1391	0.94061	1	259	7	12231	FBgn0001075
GO:0072175	epithelial tube formation	biological_process	0.1391	0.94061	1	259	7	12231	FBgn0262139
GO:0097205	renal filtration	biological_process	0.1391	0.94061	1	259	7	12231	FBgn0028369
GO:0097206	nephrocyte filtration	biological_process	0.1391	0.94061	1	259	7	12231	FBgn0028369
GO:1900087	positive regulation of G1/S transition of mitotic cell cycle	biological_process	0.1391	0.94061	1	259	7	12231	FBgn0004859
GO:1902808	positive regulation of cell cycle G1/S phase transition	biological_process	0.1391	0.94061	1	259	7	12231	FBgn0004859
GO:1990752	microtubule end	cellular_component	0.1391	0.94061	1	259	7	12231	FBgn0019968
GO:0048867	stem cell fate determination	biological_process	0.13914	0.94061	2	259	31	12231	FBgn0261963,FBgn0004878
GO:0019991	septate junction assembly	biological_process	0.13925	0.94061	2	259	31	12231	FBgn0001624,FBgn0025631
GO:0060537	muscle tissue development	biological_process	0.13926	0.94061	2	259	31	12231	FBgn0264693,FBgn0028369
GO:0042059	negative regulation of epidermal growth factor receptor signaling pathway	biological_process	0.13926	0.94061	2	259	31	12231	FBgn0029791,FBgn0040271
GO:1901185	negative regulation of ERBB signaling pathway	biological_process	0.13926	0.94061	2	259	31	12231	FBgn0040271,FBgn0029791
GO:0006040	amino sugar metabolic process	biological_process	0.14135	0.95409	5	259	130	12231	FBgn0037487,FBgn0263132,FBgn0051439,FBgn0022770,FBgn0085249
GO:0036477	somatodendritic compartment	cellular_component	0.14602	0.98185	4	259	96	12231	FBgn0260753,FBgn0259099,FBgn0264607,FBgn0266098
GO:0046474	glycerophospholipid biosynthetic process	biological_process	0.14629	0.98185	2	259	32	12231	FBgn0085390,FBgn0032955
GO:0051130	positive regulation of cellular component organization	biological_process	0.14632	0.98185	6	259	168	12231	FBgn0000114,FBgn0032252,FBgn0263111,FBgn0038975,FBgn0011817,FBgn0001624
GO:0014017	neuroblast fate commitment	biological_process	0.14647	0.98185	2	259	32	12231	FBgn0045852,FBgn0261963
GO:0016476	regulation of embryonic cell shape	biological_process	0.14655	0.98185	2	259	32	12231	FBgn0023172,FBgn0039704
GO:0052652	cyclic purine nucleotide metabolic process	biological_process	0.14656	0.98185	2	259	32	12231	FBgn0038197,FBgn0260753
GO:0000792	heterochromatin	cellular_component	0.14657	0.98185	2	259	32	12231	FBgn0005624,FBgn0025639
GO:0003007	heart morphogenesis	biological_process	0.14657	0.98185	2	259	32	12231	FBgn0004859,FBgn0264089
GO:0005096	GTPase activator activity	molecular_function	0.14657	0.98185	2	259	32	12231	FBgn0262738,FBgn0261570
GO:0005703	polytene chromosome puff	cellular_component	0.14657	0.98185	2	259	32	12231	FBgn0264695,FBgn0262975
GO:0035159	regulation of tube length, open tracheal system	biological_process	0.14657	0.98185	2	259	32	12231	FBgn0001075,FBgn0000497
GO:0006996	organelle organization	biological_process	0.14703	0.98425	40	259	1600	12231	FBgn0267727,FBgn0000559,FBgn0262975,FBgn0019968,FBgn0005624,FBgn0038197,FBgn0025639,FBgn0261573,FBgn0003392,FBgn0052082,FBgn0023172,FBgn0001624,FBgn0001320,FBgn0025631,FBgn0034070,FBgn0011826,FBgn0259685,FBgn0016694,FBgn0000182,FBgn0004587,FBgn0086901,FBgn0264272,FBgn0264695,FBgn0015600,FBgn0085408,FBgn0001075,FBgn0264693,FBgn0265356,FBgn0025391,FBgn0000244,FBgn0001139,FBgn0029157,FBgn0000497,FBg…
GO:0043068	positive regulation of programmed cell death	biological_process	0.14852	0.99359	3	259	63	12231	FBgn0264490,FBgn0013469,FBgn0000210
GO:0009798	axis specification	biological_process	0.14979	1	7	259	207	12231	FBgn0001320,FBgn0262975,FBgn0003118,FBgn0028990,FBgn0038826,FBgn0004360,FBgn0031903
GO:0008017	microtubule binding	molecular_function	0.14994	1	4	259	97	12231	FBgn0003392,FBgn0259099,FBgn0264693,FBgn0019968
GO:0016301	kinase activity	molecular_function	0.15023	1	11	259	364	12231	FBgn0032955,FBgn0011817,FBgn0001624,FBgn0025936,FBgn0053531,FBgn0033791,FBgn0010407,FBgn0033915,FBgn0085390,FBgn0052666,FBgn0264607
GO:0046331	lateral inhibition	biological_process	0.15276	1	7	259	208	12231	FBgn0263980,FBgn0264089,FBgn0051612,FBgn0020309,FBgn0000479,FBgn0262139,FBgn0001139
GO:0019904	protein domain specific binding	molecular_function	0.15354	1	3	259	64	12231	FBgn0260003,FBgn0001139,FBgn0052082
GO:0042659	regulation of cell fate specification	biological_process	0.15386	1	2	259	33	12231	FBgn0261963,FBgn0003118
GO:0060581	cell fate commitment involved in pattern specification	biological_process	0.15391	1	2	259	33	12231	FBgn0013469,FBgn0004635
GO:0006869	lipid transport	biological_process	0.15396	1	2	259	33	12231	FBgn0038975,FBgn0041111
GO:0016917	GABA receptor activity	molecular_function	0.1565	1	1	259	8	12231	FBgn0030707
GO:0006271	DNA strand elongation involved in DNA replication	biological_process	0.15713	1	1	259	8	12231	FBgn0038035
GO:0022616	DNA strand elongation	biological_process	0.15713	1	1	259	8	12231	FBgn0038035
GO:0007438	oenocyte development	biological_process	0.15721	1	1	259	8	12231	FBgn0004635
GO:0060573	cell fate specification involved in pattern specification	biological_process	0.15721	1	1	259	8	12231	FBgn0004635
GO:0030512	negative regulation of transforming growth factor beta receptor signaling pathway	biological_process	0.15722	1	1	259	8	12231	FBgn0039932
GO:1903845	negative regulation of cellular response to transforming growth factor beta stimulus	biological_process	0.15722	1	1	259	8	12231	FBgn0039932
GO:0010578	regulation of adenylate cyclase activity involved in G-protein coupled receptor signaling pathway	biological_process	0.15731	1	1	259	8	12231	FBgn0260753
GO:0004835	tubulin-tyrosine ligase activity	molecular_function	0.15733	1	1	259	8	12231	FBgn0051108
GO:0042686	regulation of cardioblast cell fate specification	biological_process	0.15733	1	1	259	8	12231	FBgn0003118
GO:2000043	regulation of cardiac cell fate specification	biological_process	0.15733	1	1	259	8	12231	FBgn0003118
GO:2000737	negative regulation of stem cell differentiation	biological_process	0.15733	1	1	259	8	12231	FBgn0003118
GO:0042694	muscle cell fate specification	biological_process	0.15733	1	1	259	8	12231	FBgn0001319
GO:0004683	calmodulin-dependent protein kinase activity	molecular_function	0.15733	1	1	259	8	12231	FBgn0264607
GO:0006482	protein demethylation	biological_process	0.15733	1	1	259	8	12231	FBgn0260397
GO:0008214	protein dealkylation	biological_process	0.15733	1	1	259	8	12231	FBgn0260397
GO:0070988	demethylation	biological_process	0.15733	1	1	259	8	12231	FBgn0260397
GO:2000253	positive regulation of feeding behavior	biological_process	0.15733	1	1	259	8	12231	FBgn0038197
GO:0032272	negative regulation of protein polymerization	biological_process	0.15733	1	1	259	8	12231	FBgn0264272
GO:0072583	clathrin-mediated endocytosis	biological_process	0.15733	1	1	259	8	12231	FBgn0003392
GO:0005154	epidermal growth factor receptor binding	molecular_function	0.15733	1	1	259	8	12231	FBgn0001624
GO:0005818	aster	cellular_component	0.15733	1	1	259	8	12231	FBgn0019968
GO:0015804	neutral amino acid transport	biological_process	0.15733	1	1	259	8	12231	FBgn0034911
GO:0016202	regulation of striated muscle tissue development	biological_process	0.15733	1	1	259	8	12231	FBgn0028369
GO:0022409	positive regulation of cell-cell adhesion	biological_process	0.15733	1	1	259	8	12231	FBgn0264089
GO:0032783	ELL-EAF complex	cellular_component	0.15733	1	1	259	8	12231	FBgn0041111
GO:0035221	genital disc pattern formation	biological_process	0.15733	1	1	259	8	12231	FBgn0004859
GO:0035224	genital disc anterior/posterior pattern formation	biological_process	0.15733	1	1	259	8	12231	FBgn0004859
GO:0045175	basal protein localization	biological_process	0.15733	1	1	259	8	12231	FBgn0001624
GO:0046658	anchored component of plasma membrane	cellular_component	0.15733	1	1	259	8	12231	FBgn0262869
GO:0046671	negative regulation of retinal cell programmed cell death	biological_process	0.15733	1	1	259	8	12231	FBgn0262738
GO:0046673	negative regulation of compound eye retinal cell programmed cell death	biological_process	0.15733	1	1	259	8	12231	FBgn0262738
GO:0051147	regulation of muscle cell differentiation	biological_process	0.15733	1	1	259	8	12231	FBgn0028369
GO:0051153	regulation of striated muscle cell differentiation	biological_process	0.15733	1	1	259	8	12231	FBgn0028369
GO:0060571	morphogenesis of an epithelial fold	biological_process	0.15733	1	1	259	8	12231	FBgn0023172
GO:1901861	regulation of muscle tissue development	biological_process	0.15733	1	1	259	8	12231	FBgn0028369
GO:2000331	regulation of terminal button organization	biological_process	0.15733	1	1	259	8	12231	FBgn0038975
GO:0051301	cell division	biological_process	0.15801	1	9	259	288	12231	FBgn0004635,FBgn0001624,FBgn0004606,FBgn0001320,FBgn0003392,FBgn0000114,FBgn0261451,FBgn0013469,FBgn0041111
GO:0008361	regulation of cell size	biological_process	0.15862	1	3	259	65	12231	FBgn0041111,FBgn0263980,FBgn0038197
GO:0045168	cell-cell signaling involved in cell fate commitment	biological_process	0.16076	1	7	259	211	12231	FBgn0000479,FBgn0262139,FBgn0001139,FBgn0263980,FBgn0020309,FBgn0051612,FBgn0264089
GO:0050777	negative regulation of immune response	biological_process	0.16107	1	2	259	34	12231	FBgn0028990,FBgn0034070
GO:0007354	zygotic determination of anterior/posterior axis, embryo	biological_process	0.16111	1	2	259	34	12231	FBgn0003118,FBgn0001320
GO:0046847	filopodium assembly	biological_process	0.16142	1	2	259	34	12231	FBgn0052082,FBgn0264607
GO:0005539	glycosaminoglycan binding	molecular_function	0.16142	1	2	259	34	12231	FBgn0000108,FBgn0264089
GO:0034976	response to endoplasmic reticulum stress	biological_process	0.16142	1	2	259	34	12231	FBgn0013995,FBgn0052423
GO:0050770	regulation of axonogenesis	biological_process	0.16142	1	2	259	34	12231	FBgn0023172,FBgn0029157
GO:0008509	anion transmembrane transporter activity	molecular_function	0.16699	1	6	259	175	12231	FBgn0034911,FBgn0259111,FBgn0036732,FBgn0264908,FBgn0038652,FBgn0051634
GO:0010453	regulation of cell fate commitment	biological_process	0.16884	1	2	259	35	12231	FBgn0003118,FBgn0261963
GO:0032507	maintenance of protein location in cell	biological_process	0.16886	1	2	259	35	12231	FBgn0000244,FBgn0025391
GO:0018022	peptidyl-lysine methylation	biological_process	0.16887	1	2	259	35	12231	FBgn0025639,FBgn0261573
GO:0034968	histone lysine methylation	biological_process	0.16887	1	2	259	35	12231	FBgn0025639,FBgn0261573
GO:0007494	midgut development	biological_process	0.16894	1	2	259	35	12231	FBgn0020307,FBgn0086901
GO:0099738	cell cortex region	cellular_component	0.16894	1	2	259	35	12231	FBgn0001624,FBgn0023172
GO:0019748	secondary metabolic process	biological_process	0.16994	1	4	259	102	12231	FBgn0028990,FBgn0264707,FBgn0259099,FBgn0025936
GO:0044765	single-organism transport	biological_process	0.17148	1	36	259	1448	12231	FBgn0259685,FBgn0037766,FBgn0030707,FBgn0003499,FBgn0000036,FBgn0013995,FBgn0260003,FBgn0263397,FBgn0264490,FBgn0051634,FBgn0003392,FBgn0033494,FBgn0015919,FBgn0032151,FBgn0023091,FBgn0003118,FBgn0038652,FBgn0028704,FBgn0032593,FBgn0261090,FBgn0030872,FBgn0267727,FBgn0038975,FBgn0259111,FBgn0036732,FBgn0260964,FBgn0041111,FBgn0037387,FBgn0020307,FBgn0259822,FBgn0263111,FBgn0034911,FBgn0038837,FBg…
GO:1901615	organic hydroxy compound metabolic process	biological_process	0.17199	1	5	259	139	12231	FBgn0259099,FBgn0000024,FBgn0025936,FBgn0028990,FBgn0264707
GO:0097367	carbohydrate derivative binding	molecular_function	0.17233	1	25	259	967	12231	FBgn0038035,FBgn0264695,FBgn0041604,FBgn0086613,FBgn0052666,FBgn0003392,FBgn0263132,FBgn0019968,FBgn0000559,FBgn0011817,FBgn0025936,FBgn0264089,FBgn0053531,FBgn0085249,FBgn0010407,FBgn0037487,FBgn0033915,FBgn0032194,FBgn0000557,FBgn0051439,FBgn0264607,FBgn0263873,FBgn0000108,FBgn0022770,FBgn0033791
GO:0004930	G-protein coupled receptor activity	molecular_function	0.17311	1	6	259	177	12231	FBgn0004842,FBgn0261929,FBgn0038880,FBgn0260753,FBgn0052843,FBgn0025631
GO:0055085	transmembrane transport	biological_process	0.17385	1	13	259	458	12231	FBgn0028704,FBgn0013995,FBgn0032593,FBgn0263397,FBgn0259822,FBgn0259145,FBgn0263111,FBgn0259685,FBgn0033494,FBgn0034247,FBgn0260964,FBgn0037387,FBgn0038652
GO:0045597	positive regulation of cell differentiation	biological_process	0.17414	1	3	259	68	12231	FBgn0004859,FBgn0000114,FBgn0013469
GO:0048640	negative regulation of developmental growth	biological_process	0.17415	1	3	259	68	12231	FBgn0001075,FBgn0259685,FBgn0038197
GO:0008584	male gonad development	biological_process	0.1745	1	1	259	9	12231	FBgn0024288
GO:0046546	development of primary male sexual characteristics	biological_process	0.1745	1	1	259	9	12231	FBgn0024288
GO:0035065	regulation of histone acetylation	biological_process	0.17502	1	1	259	9	12231	FBgn0261573
GO:1901983	regulation of protein acetylation	biological_process	0.17502	1	1	259	9	12231	FBgn0261573
GO:2000756	regulation of peptidyl-lysine acetylation	biological_process	0.17502	1	1	259	9	12231	FBgn0261573
GO:0001742	oenocyte differentiation	biological_process	0.17506	1	1	259	9	12231	FBgn0004635
GO:0048148	behavioral response to cocaine	biological_process	0.17517	1	1	259	9	12231	FBgn0025631
GO:0045464	R8 cell fate specification	biological_process	0.17517	1	1	259	9	12231	FBgn0000413
GO:0061382	Malpighian tubule tip cell differentiation	biological_process	0.17517	1	1	259	9	12231	FBgn0000413
GO:0042685	cardioblast cell fate specification	biological_process	0.17517	1	1	259	9	12231	FBgn0003118
GO:0035288	anterior head segmentation	biological_process	0.17518	1	1	259	9	12231	FBgn0001319
GO:0097065	anterior head development	biological_process	0.17518	1	1	259	9	12231	FBgn0001319
GO:0040015	negative regulation of multicellular organism growth	biological_process	0.17518	1	1	259	9	12231	FBgn0038197
GO:0034334	adherens junction maintenance	biological_process	0.17518	1	1	259	9	12231	FBgn0003392
GO:0005927	muscle tendon junction	cellular_component	0.17518	1	1	259	9	12231	FBgn0265991
GO:0004143	diacylglycerol kinase activity	molecular_function	0.17518	1	1	259	9	12231	FBgn0085390
GO:0005041	low-density lipoprotein receptor activity	molecular_function	0.17518	1	1	259	9	12231	FBgn0261260
GO:0005704	polytene chromosome band	cellular_component	0.17518	1	1	259	9	12231	FBgn0005624
GO:0005902	microvillus	cellular_component	0.17518	1	1	259	9	12231	FBgn0039709
GO:0007205	protein kinase C-activating G-protein coupled receptor signaling pathway	biological_process	0.17518	1	1	259	9	12231	FBgn0085390
GO:0007458	progression of morphogenetic furrow involved in compound eye morphogenesis	biological_process	0.17518	1	1	259	9	12231	FBgn0000210
GO:0007523	larval visceral muscle development	biological_process	0.17518	1	1	259	9	12231	FBgn0028369
GO:0008484	sulfuric ester hydrolase activity	molecular_function	0.17518	1	1	259	9	12231	FBgn0040271
GO:0014069	postsynaptic density	cellular_component	0.17518	1	1	259	9	12231	FBgn0040752
GO:0015807	L-amino acid transport	biological_process	0.17518	1	1	259	9	12231	FBgn0034911
GO:0016335	morphogenesis of larval imaginal disc epithelium	biological_process	0.17518	1	1	259	9	12231	FBgn0001624
GO:0022408	negative regulation of cell-cell adhesion	biological_process	0.17518	1	1	259	9	12231	FBgn0001624
GO:0030588	pseudocleavage	biological_process	0.17518	1	1	259	9	12231	FBgn0023172
GO:0030589	pseudocleavage involved in syncytial blastoderm formation	biological_process	0.17518	1	1	259	9	12231	FBgn0023172
GO:0031225	anchored component of membrane	cellular_component	0.17518	1	1	259	9	12231	FBgn0262869
GO:0043153	entrainment of circadian clock by photoperiod	biological_process	0.17518	1	1	259	9	12231	FBgn0262738
GO:0045571	negative regulation of imaginal disc growth	biological_process	0.17518	1	1	259	9	12231	FBgn0001075
GO:0045785	positive regulation of cell adhesion	biological_process	0.17518	1	1	259	9	12231	FBgn0264089
GO:0046670	positive regulation of retinal cell programmed cell death	biological_process	0.17518	1	1	259	9	12231	FBgn0013469
GO:0046672	positive regulation of compound eye retinal cell programmed cell death	biological_process	0.17518	1	1	259	9	12231	FBgn0013469
GO:0050918	positive chemotaxis	biological_process	0.17518	1	1	259	9	12231	FBgn0004449
GO:0060232	delamination	biological_process	0.17518	1	1	259	9	12231	FBgn0001624
GO:0060632	regulation of microtubule-based movement	biological_process	0.17518	1	1	259	9	12231	FBgn0264693
GO:1902803	regulation of synaptic vesicle transport	biological_process	0.17518	1	1	259	9	12231	FBgn0038975
GO:0008610	lipid biosynthetic process	biological_process	0.17555	1	5	259	140	12231	FBgn0004914,FBgn0034145,FBgn0262738,FBgn0032955,FBgn0085390
GO:0016604	nuclear body	cellular_component	0.17605	1	2	259	36	12231	FBgn0267791,FBgn0004587
GO:0045747	positive regulation of Notch signaling pathway	biological_process	0.17645	1	2	259	36	12231	FBgn0261573,FBgn0003392
GO:0010001	glial cell differentiation	biological_process	0.1765	1	2	259	36	12231	FBgn0025631,FBgn0004878
GO:0008064	regulation of actin polymerization or depolymerization	biological_process	0.17652	1	2	259	36	12231	FBgn0029157,FBgn0264272
GO:0030832	regulation of actin filament length	biological_process	0.17652	1	2	259	36	12231	FBgn0029157,FBgn0264272
GO:0016333	morphogenesis of follicular epithelium	biological_process	0.17652	1	2	259	36	12231	FBgn0259685,FBgn0001624
GO:0030100	regulation of endocytosis	biological_process	0.17652	1	2	259	36	12231	FBgn0261260,FBgn0038975
GO:0030695	GTPase regulator activity	molecular_function	0.17652	1	2	259	36	12231	FBgn0262738,FBgn0261570
GO:0035075	response to ecdysone	biological_process	0.17652	1	2	259	36	12231	FBgn0264490,FBgn0000210
GO:0036314	response to sterol	biological_process	0.17652	1	2	259	36	12231	FBgn0264490,FBgn0000210
GO:1901654	response to ketone	biological_process	0.17652	1	2	259	36	12231	FBgn0000210,FBgn0264490
GO:0015631	tubulin binding	molecular_function	0.17847	1	4	259	104	12231	FBgn0003392,FBgn0259099,FBgn0264693,FBgn0019968
GO:0000790	nuclear chromatin	cellular_component	0.17942	1	3	259	69	12231	FBgn0086613,FBgn0025639,FBgn0005624
GO:0010942	positive regulation of cell death	biological_process	0.17942	1	3	259	69	12231	FBgn0013469,FBgn0000210,FBgn0264490
GO:0010876	lipid localization	biological_process	0.17942	1	3	259	69	12231	FBgn0038197,FBgn0041111,FBgn0038975
GO:0032101	regulation of response to external stimulus	biological_process	0.18268	1	4	259	105	12231	FBgn0003117,FBgn0038197,FBgn0262738,FBgn0259234
GO:0006813	potassium ion transport	biological_process	0.1841	1	2	259	37	12231	FBgn0263397,FBgn0033494
GO:0007419	ventral cord development	biological_process	0.18413	1	2	259	37	12231	FBgn0004878,FBgn0025631
GO:0051647	nucleus localization	biological_process	0.18415	1	2	259	37	12231	FBgn0264693,FBgn0262975
GO:0007405	neuroblast proliferation	biological_process	0.18473	1	3	259	70	12231	FBgn0013469,FBgn0261451,FBgn0001624
GO:1902532	negative regulation of intracellular signal transduction	biological_process	0.18473	1	3	259	70	12231	FBgn0086901,FBgn0261570,FBgn0013469
GO:0010941	regulation of cell death	biological_process	0.18579	1	6	259	181	12231	FBgn0262738,FBgn0000210,FBgn0013469,FBgn0000108,FBgn0003118,FBgn0264490
GO:0005622	intracellular	cellular_component	0.1864	1	110	259	4847	12231	FBgn0010575,FBgn0261963,FBgn0005624,FBgn0005630,FBgn0000024,FBgn0261090,FBgn0039920,FBgn0038197,FBgn0025639,FBgn0267727,FBgn0041092,FBgn0000559,FBgn0030872,FBgn0262139,FBgn0019968,FBgn0013469,FBgn0011826,FBgn0000557,FBgn0003499,FBgn0045852,FBgn0086898,FBgn0001320,FBgn0005677,FBgn0003382,FBgn0085432,FBgn0003175,FBgn0015600,FBgn0015032,FBgn0259234,FBgn0014343,FBgn0000179,FBgn0000114,FBgn0030738,FBg…
GO:0006836	neurotransmitter transport	biological_process	0.18642	1	5	259	143	12231	FBgn0260964,FBgn0263111,FBgn0034911,FBgn0261090,FBgn0260003
GO:0016773	phosphotransferase activity, alcohol group as acceptor	molecular_function	0.1872	1	10	259	341	12231	FBgn0033915,FBgn0085390,FBgn0052666,FBgn0264607,FBgn0032955,FBgn0011817,FBgn0025936,FBgn0053531,FBgn0033791,FBgn0010407
GO:0051234	establishment of localization	biological_process	0.18726	1	41	259	1685	12231	FBgn0034911,FBgn0034247,FBgn0038837,FBgn0264908,FBgn0259145,FBgn0036732,FBgn0259111,FBgn0260964,FBgn0261260,FBgn0020307,FBgn0041111,FBgn0037387,FBgn0259822,FBgn0264693,FBgn0263111,FBgn0003392,FBgn0032151,FBgn0033494,FBgn0015919,FBgn0023091,FBgn0038652,FBgn0003118,FBgn0032593,FBgn0028704,FBgn0261090,FBgn0267727,FBgn0038975,FBgn0030872,FBgn0004885,FBgn0019968,FBgn0259685,FBgn0000036,FBgn0037766,FBg…
GO:0016458	gene silencing	biological_process	0.19006	1	5	259	144	12231	FBgn0005624,FBgn0263974,FBgn0260397,FBgn0020309,FBgn0025639
GO:0061351	neural precursor cell proliferation	biological_process	0.19008	1	3	259	71	12231	FBgn0013469,FBgn0261451,FBgn0001624
GO:0031667	response to nutrient levels	biological_process	0.19122	1	4	259	107	12231	FBgn0003392,FBgn0038197,FBgn0263397,FBgn0016694
GO:0004620	phospholipase activity	molecular_function	0.19168	1	2	259	38	12231	FBgn0262738,FBgn0044328
GO:0045495	pole plasm	cellular_component	0.19182	1	2	259	38	12231	FBgn0000114,FBgn0263974
GO:0004702	receptor signaling protein serine/threonine kinase activity	molecular_function	0.19183	1	2	259	38	12231	FBgn0011817,FBgn0033915
GO:0098802	plasma membrane receptor complex	cellular_component	0.19183	1	2	259	38	12231	FBgn0000036,FBgn0032151
GO:0006376	mRNA splice site selection	biological_process	0.19233	1	1	259	10	12231	FBgn0004587
GO:0045742	positive regulation of epidermal growth factor receptor signaling pathway	biological_process	0.19253	1	1	259	10	12231	FBgn0004635
GO:1901186	positive regulation of ERBB signaling pathway	biological_process	0.19253	1	1	259	10	12231	FBgn0004635
GO:0030816	positive regulation of cAMP metabolic process	biological_process	0.19263	1	1	259	10	12231	FBgn0260753
GO:0030819	positive regulation of cAMP biosynthetic process	biological_process	0.19263	1	1	259	10	12231	FBgn0260753
GO:0045762	positive regulation of adenylate cyclase activity	biological_process	0.19263	1	1	259	10	12231	FBgn0260753
GO:0007492	endoderm development	biological_process	0.19264	1	1	259	10	12231	FBgn0004914
GO:0016330	second mitotic wave involved in compound eye morphogenesis	biological_process	0.19264	1	1	259	10	12231	FBgn0000413
GO:0060912	cardiac cell fate specification	biological_process	0.19264	1	1	259	10	12231	FBgn0003118
GO:0035171	lamellocyte differentiation	biological_process	0.19264	1	1	259	10	12231	FBgn0001319
GO:0015301	anion:anion antiporter activity	molecular_function	0.19265	1	1	259	10	12231	FBgn0259111
GO:0017048	Rho GTPase binding	molecular_function	0.19265	1	1	259	10	12231	FBgn0264272
GO:0071711	basement membrane organization	biological_process	0.19265	1	1	259	10	12231	FBgn0260660
GO:0002251	organ or tissue specific immune response	biological_process	0.19265	1	1	259	10	12231	FBgn0262738
GO:0002385	mucosal immune response	biological_process	0.19265	1	1	259	10	12231	FBgn0262738
GO:0005070	SH3/SH2 adaptor activity	molecular_function	0.19265	1	1	259	10	12231	FBgn0051163
GO:0005343	organic acid:sodium symporter activity	molecular_function	0.19265	1	1	259	10	12231	FBgn0034911
GO:0006825	copper ion transport	biological_process	0.19265	1	1	259	10	12231	FBgn0020307
GO:0007162	negative regulation of cell adhesion	biological_process	0.19265	1	1	259	10	12231	FBgn0001624
GO:0007204	positive regulation of cytosolic calcium ion concentration	biological_process	0.19265	1	1	259	10	12231	FBgn0262738
GO:0009648	photoperiodism	biological_process	0.19265	1	1	259	10	12231	FBgn0262738
GO:0009897	external side of plasma membrane	cellular_component	0.19265	1	1	259	10	12231	FBgn0262869
GO:0016027	inaD signaling complex	cellular_component	0.19265	1	1	259	10	12231	FBgn0262738
GO:0016460	myosin II complex	cellular_component	0.19265	1	1	259	10	12231	FBgn0264695
GO:0023021	termination of signal transduction	biological_process	0.19265	1	1	259	10	12231	FBgn0023172
GO:0035070	salivary gland histolysis	biological_process	0.19265	1	1	259	10	12231	FBgn0000210
GO:0035102	PRC1 complex	cellular_component	0.19265	1	1	259	10	12231	FBgn0005624
GO:0038032	termination of G-protein coupled receptor signaling pathway	biological_process	0.19265	1	1	259	10	12231	FBgn0023172
GO:0045186	zonula adherens assembly	biological_process	0.19265	1	1	259	10	12231	FBgn0259685
GO:0045450	bicoid mRNA localization	biological_process	0.19265	1	1	259	10	12231	FBgn0262975
GO:0045744	negative regulation of G-protein coupled receptor protein signaling pathway	biological_process	0.19265	1	1	259	10	12231	FBgn0023172
GO:0048678	response to axon injury	biological_process	0.19265	1	1	259	10	12231	FBgn0000108
GO:0051865	protein autoubiquitination	biological_process	0.19265	1	1	259	10	12231	FBgn0263974
GO:0060361	flight	biological_process	0.19265	1	1	259	10	12231	FBgn0264695
GO:0061174	type I terminal bouton	cellular_component	0.19265	1	1	259	10	12231	FBgn0001624
GO:0017124	SH3 domain binding	molecular_function	0.19265	1	1	259	10	12231	FBgn0052082
GO:0070864	sperm individualization complex	cellular_component	0.19265	1	1	259	10	12231	FBgn0003392
GO:0071683	sensory dendrite	cellular_component	0.19265	1	1	259	10	12231	FBgn0259099
GO:0051241	negative regulation of multicellular organismal process	biological_process	0.1974	1	5	259	146	12231	FBgn0003118,FBgn0262738,FBgn0001075,FBgn0259685,FBgn0038197
GO:0045185	maintenance of protein location	biological_process	0.19947	1	2	259	39	12231	FBgn0000244,FBgn0025391
GO:0090287	regulation of cellular response to growth factor stimulus	biological_process	0.19951	1	2	259	39	12231	FBgn0040271,FBgn0039932
GO:0007455	eye-antennal disc morphogenesis	biological_process	0.19956	1	2	259	39	12231	FBgn0003118,FBgn0003382
GO:0045448	mitotic cell cycle, embryonic	biological_process	0.19956	1	2	259	39	12231	FBgn0005624,FBgn0015600
GO:0055059	asymmetric neuroblast division	biological_process	0.19956	1	2	259	39	12231	FBgn0261451,FBgn0001624
GO:0071482	cellular response to light stimulus	biological_process	0.19956	1	2	259	39	12231	FBgn0259234,FBgn0262738
GO:0008514	organic anion transmembrane transporter activity	molecular_function	0.19979	1	4	259	109	12231	FBgn0034911,FBgn0259111,FBgn0036732,FBgn0051634
GO:0044431	Golgi apparatus part	cellular_component	0.19987	1	4	259	109	12231	FBgn0031530,FBgn0040271,FBgn0004509,FBgn0259170
GO:0009991	response to extracellular stimulus	biological_process	0.19987	1	4	259	109	12231	FBgn0016694,FBgn0003392,FBgn0038197,FBgn0263397
GO:0006650	glycerophospholipid metabolic process	biological_process	0.2007	1	3	259	73	12231	FBgn0032955,FBgn0085390,FBgn0262738
GO:0098791	Golgi subcompartment	cellular_component	0.20637	1	3	259	74	12231	FBgn0040271,FBgn0031530,FBgn0004509
GO:0008258	head involution	biological_process	0.20731	1	2	259	40	12231	FBgn0000633,FBgn0086901
GO:0036445	neuronal stem cell division	biological_process	0.20731	1	2	259	40	12231	FBgn0261451,FBgn0001624
GO:0042052	rhabdomere development	biological_process	0.20731	1	2	259	40	12231	FBgn0259685,FBgn0034070
GO:0055057	neuroblast division	biological_process	0.20731	1	2	259	40	12231	FBgn0261451,FBgn0001624
GO:0006022	aminoglycan metabolic process	biological_process	0.20814	1	5	259	149	12231	FBgn0051439,FBgn0022770,FBgn0085249,FBgn0263132,FBgn0037487
GO:0043455	regulation of secondary metabolic process	biological_process	0.20895	1	1	259	11	12231	FBgn0028990
GO:0015833	peptide transport	biological_process	0.20939	1	1	259	11	12231	FBgn0023091
GO:0030381	chorion-containing eggshell pattern formation	biological_process	0.20952	1	1	259	11	12231	FBgn0261963
GO:0007301	female germline ring canal formation	biological_process	0.20955	1	1	259	11	12231	FBgn0267727
GO:0031060	regulation of histone methylation	biological_process	0.2096	1	1	259	11	12231	FBgn0261573
GO:0007096	regulation of exit from mitosis	biological_process	0.20972	1	1	259	11	12231	FBgn0000114
GO:0030801	positive regulation of cyclic nucleotide metabolic process	biological_process	0.20973	1	1	259	11	12231	FBgn0260753
GO:0030804	positive regulation of cyclic nucleotide biosynthetic process	biological_process	0.20973	1	1	259	11	12231	FBgn0260753
GO:0031281	positive regulation of cyclase activity	biological_process	0.20973	1	1	259	11	12231	FBgn0260753
GO:0015277	kainate selective glutamate receptor activity	molecular_function	0.20975	1	1	259	11	12231	FBgn0038837
GO:0008239	dipeptidyl-peptidase activity	molecular_function	0.20975	1	1	259	11	12231	FBgn0259175
GO:0031333	negative regulation of protein complex assembly	biological_process	0.20975	1	1	259	11	12231	FBgn0264272
GO:0007377	germ-band extension	biological_process	0.20975	1	1	259	11	12231	FBgn0023172
GO:0019722	calcium-mediated signaling	biological_process	0.20975	1	1	259	11	12231	FBgn0262738
GO:0030228	lipoprotein particle receptor activity	molecular_function	0.20975	1	1	259	11	12231	FBgn0261260
GO:0042439	ethanolamine-containing compound metabolic process	biological_process	0.20975	1	1	259	11	12231	FBgn0000024
GO:0045196	establishment or maintenance of neuroblast polarity	biological_process	0.20975	1	1	259	11	12231	FBgn0001624
GO:0051480	cytosolic calcium ion homeostasis	biological_process	0.20975	1	1	259	11	12231	FBgn0262738
GO:0072553	terminal button organization	biological_process	0.20975	1	1	259	11	12231	FBgn0038975
GO:2000274	regulation of epithelial cell migration, open tracheal system	biological_process	0.20975	1	1	259	11	12231	FBgn0264089
GO:0004672	protein kinase activity	molecular_function	0.21113	1	8	259	269	12231	FBgn0033915,FBgn0052666,FBgn0264607,FBgn0011817,FBgn0033791,FBgn0010407,FBgn0025936,FBgn0053531
GO:0007606	sensory perception of chemical stimulus	biological_process	0.21369	1	8	259	270	12231	FBgn0029974,FBgn0040823,FBgn0262738,FBgn0053481,FBgn0052600,FBgn0034286,FBgn0030723,FBgn0051163
GO:0016571	histone methylation	biological_process	0.21504	1	2	259	41	12231	FBgn0261573,FBgn0025639
GO:0008344	adult locomotory behavior	biological_process	0.21739	1	3	259	76	12231	FBgn0263111,FBgn0262738,FBgn0259099
GO:0000377	RNA splicing, via transesterification reactions with bulged adenosine as nucleophile	biological_process	0.21821	1	7	259	231	12231	FBgn0000114,FBgn0004587,FBgn0038826,FBgn0032194,FBgn0267791,FBgn0039920,FBgn0032388
GO:0000398	mRNA splicing, via spliceosome	biological_process	0.21821	1	7	259	231	12231	FBgn0267791,FBgn0039920,FBgn0032194,FBgn0038826,FBgn0004587,FBgn0000114,FBgn0032388
GO:0008340	determination of adult lifespan	biological_process	0.21999	1	5	259	152	12231	FBgn0038880,FBgn0262975,FBgn0259170,FBgn0263397,FBgn0038197
GO:0000375	RNA splicing, via transesterification reactions	biological_process	0.22128	1	7	259	232	12231	FBgn0032388,FBgn0004587,FBgn0000114,FBgn0039920,FBgn0267791,FBgn0038826,FBgn0032194
GO:0043207	response to external biotic stimulus	biological_process	0.22186	1	9	259	314	12231	FBgn0028990,FBgn0034070,FBgn0000210,FBgn0263873,FBgn0004606,FBgn0005630,FBgn0003117,FBgn0038197,FBgn0001319
GO:0051707	response to other organism	biological_process	0.22186	1	9	259	314	12231	FBgn0004606,FBgn0005630,FBgn0001319,FBgn0038197,FBgn0003117,FBgn0028990,FBgn0034070,FBgn0263873,FBgn0000210
GO:0007298	border follicle cell migration	biological_process	0.222	1	4	259	114	12231	FBgn0264695,FBgn0264442,FBgn0041092,FBgn0003392
GO:0048489	synaptic vesicle transport	biological_process	0.222	1	4	259	114	12231	FBgn0261090,FBgn0003392,FBgn0038975,FBgn0260964
GO:0097480	establishment of synaptic vesicle localization	biological_process	0.222	1	4	259	114	12231	FBgn0260964,FBgn0038975,FBgn0261090,FBgn0003392
GO:0044057	regulation of system process	biological_process	0.22287	1	2	259	42	12231	FBgn0033494,FBgn0263111
GO:0030727	germarium-derived female germ-line cyst formation	biological_process	0.22291	1	2	259	42	12231	FBgn0000114,FBgn0003392
GO:0009190	cyclic nucleotide biosynthetic process	biological_process	0.22291	1	2	259	42	12231	FBgn0038197,FBgn0260753
GO:0004722	protein serine/threonine phosphatase activity	molecular_function	0.22292	1	2	259	42	12231	FBgn0032749,FBgn0011826
GO:0060589	nucleoside-triphosphatase regulator activity	molecular_function	0.22292	1	2	259	42	12231	FBgn0261570,FBgn0262738
GO:0031984	organelle subcompartment	cellular_component	0.22295	1	3	259	77	12231	FBgn0004509,FBgn0031530,FBgn0040271
GO:0051093	negative regulation of developmental process	biological_process	0.22383	1	5	259	153	12231	FBgn0001075,FBgn0259685,FBgn0038197,FBgn0262738,FBgn0003118
GO:0030514	negative regulation of BMP signaling pathway	biological_process	0.22638	1	1	259	12	12231	FBgn0039932
GO:0007189	adenylate cyclase-activating G-protein coupled receptor signaling pathway	biological_process	0.22647	1	1	259	12	12231	FBgn0260753
GO:0030810	positive regulation of nucleotide biosynthetic process	biological_process	0.22647	1	1	259	12	12231	FBgn0260753
GO:0045981	positive regulation of nucleotide metabolic process	biological_process	0.22647	1	1	259	12	12231	FBgn0260753
GO:0051349	positive regulation of lyase activity	biological_process	0.22647	1	1	259	12	12231	FBgn0260753
GO:1900373	positive regulation of purine nucleotide biosynthetic process	biological_process	0.22647	1	1	259	12	12231	FBgn0260753
GO:1900544	positive regulation of purine nucleotide metabolic process	biological_process	0.22647	1	1	259	12	12231	FBgn0260753
GO:0000184	nuclear-transcribed mRNA catabolic process, nonsense-mediated decay	biological_process	0.22648	1	1	259	12	12231	FBgn0039260
GO:0006662	glycerol ether metabolic process	biological_process	0.22649	1	1	259	12	12231	FBgn0034145
GO:0018904	ether metabolic process	biological_process	0.22649	1	1	259	12	12231	FBgn0034145
GO:0046627	negative regulation of insulin receptor signaling pathway	biological_process	0.22649	1	1	259	12	12231	FBgn0038197
GO:1900077	negative regulation of cellular response to insulin stimulus	biological_process	0.22649	1	1	259	12	12231	FBgn0038197
GO:0000132	establishment of mitotic spindle orientation	biological_process	0.22649	1	1	259	12	12231	FBgn0001624
GO:0002052	positive regulation of neuroblast proliferation	biological_process	0.22649	1	1	259	12	12231	FBgn0013469
GO:0003014	renal system process	biological_process	0.22649	1	1	259	12	12231	FBgn0028369
GO:0003951	NAD+ kinase activity	molecular_function	0.22649	1	1	259	12	12231	FBgn0085390
GO:0006821	chloride transport	biological_process	0.22649	1	1	259	12	12231	FBgn0259111
GO:0007440	foregut morphogenesis	biological_process	0.22649	1	1	259	12	12231	FBgn0000633
GO:0008013	beta-catenin binding	molecular_function	0.22649	1	1	259	12	12231	FBgn0085432
GO:0010632	regulation of epithelial cell migration	biological_process	0.22649	1	1	259	12	12231	FBgn0264089
GO:0031011	Ino80 complex	cellular_component	0.22649	1	1	259	12	12231	FBgn0086613
GO:0035002	liquid clearance, open tracheal system	biological_process	0.22649	1	1	259	12	12231	FBgn0259685
GO:0035330	regulation of hippo signaling	biological_process	0.22649	1	1	259	12	12231	FBgn0259685
GO:0035591	signaling adaptor activity	molecular_function	0.22649	1	1	259	12	12231	FBgn0051163
GO:0046164	alcohol catabolic process	biological_process	0.22649	1	1	259	12	12231	FBgn0000024
GO:0097346	INO80-type complex	cellular_component	0.22649	1	1	259	12	12231	FBgn0086613
GO:1901616	organic hydroxy compound catabolic process	biological_process	0.22649	1	1	259	12	12231	FBgn0000024
GO:0008360	regulation of cell shape	biological_process	0.22649	1	4	259	115	12231	FBgn0023172,FBgn0052666,FBgn0004449,FBgn0039704
GO:0097479	synaptic vesicle localization	biological_process	0.2265	1	4	259	115	12231	FBgn0038975,FBgn0260964,FBgn0261090,FBgn0003392
GO:0009607	response to biotic stimulus	biological_process	0.22715	1	9	259	316	12231	FBgn0001319,FBgn0038197,FBgn0003117,FBgn0005630,FBgn0004606,FBgn0263873,FBgn0000210,FBgn0034070,FBgn0028990
GO:0009950	dorsal/ventral axis specification	biological_process	0.22828	1	3	259	78	12231	FBgn0038826,FBgn0028990,FBgn0262975
GO:0036464	cytoplasmic ribonucleoprotein granule	cellular_component	0.23074	1	2	259	43	12231	FBgn0000114,FBgn0263974
GO:0007379	segment specification	biological_process	0.23076	1	2	259	43	12231	FBgn0041111,FBgn0001319
GO:0000139	Golgi membrane	cellular_component	0.23076	1	2	259	43	12231	FBgn0259170,FBgn0004509
GO:0005856	cytoskeleton	cellular_component	0.23121	1	16	259	615	12231	FBgn0085376,FBgn0260003,FBgn0029881,FBgn0029157,FBgn0023172,FBgn0264693,FBgn0001624,FBgn0264449,FBgn0019968,FBgn0267727,FBgn0000559,FBgn0003392,FBgn0085408,FBgn0085432,FBgn0264695,FBgn0015600
GO:0010259	multicellular organismal aging	biological_process	0.23157	1	5	259	155	12231	FBgn0038197,FBgn0263397,FBgn0259170,FBgn0262975,FBgn0038880
GO:0045927	positive regulation of growth	biological_process	0.23416	1	3	259	79	12231	FBgn0263111,FBgn0011817,FBgn0001624
GO:0001664	G-protein coupled receptor binding	molecular_function	0.23825	1	2	259	44	12231	FBgn0031903,FBgn0004360
GO:0048135	female germ-line cyst formation	biological_process	0.2386	1	2	259	44	12231	FBgn0003392,FBgn0000114
GO:0007310	oocyte dorsal/ventral axis specification	biological_process	0.23861	1	2	259	44	12231	FBgn0262975,FBgn0038826
GO:0008154	actin polymerization or depolymerization	biological_process	0.23861	1	2	259	44	12231	FBgn0029157,FBgn0264272
GO:0045746	negative regulation of Notch signaling pathway	biological_process	0.23861	1	2	259	44	12231	FBgn0259685,FBgn0029881
GO:0003774	motor activity	molecular_function	0.2398	1	3	259	80	12231	FBgn0264695,FBgn0019968,FBgn0003392
GO:0051650	establishment of vesicle localization	biological_process	0.24015	1	4	259	118	12231	FBgn0003392,FBgn0261090,FBgn0260964,FBgn0038975
GO:0004558	alpha-1,4-glucosidase activity	molecular_function	0.24224	1	1	259	13	12231	FBgn0002569
GO:0008076	voltage-gated potassium channel complex	cellular_component	0.24277	1	1	259	13	12231	FBgn0033494
GO:0007436	larval salivary gland morphogenesis	biological_process	0.24277	1	1	259	13	12231	FBgn0004635
GO:0035309	wing and notum subfield formation	biological_process	0.24277	1	1	259	13	12231	FBgn0004635
GO:0010458	exit from mitosis	biological_process	0.24285	1	1	259	13	12231	FBgn0000114
GO:0045840	positive regulation of mitotic nuclear division	biological_process	0.24285	1	1	259	13	12231	FBgn0000114
GO:0042220	response to cocaine	biological_process	0.24286	1	1	259	13	12231	FBgn0025631
GO:0060359	response to ammonium ion	biological_process	0.24286	1	1	259	13	12231	FBgn0025631
GO:0060828	regulation of canonical Wnt signaling pathway	biological_process	0.24287	1	1	259	13	12231	FBgn0001139
GO:0005977	glycogen metabolic process	biological_process	0.24287	1	1	259	13	12231	FBgn0038197
GO:0006073	cellular glucan metabolic process	biological_process	0.24287	1	1	259	13	12231	FBgn0038197
GO:0006112	energy reserve metabolic process	biological_process	0.24287	1	1	259	13	12231	FBgn0038197
GO:0044042	glucan metabolic process	biological_process	0.24287	1	1	259	13	12231	FBgn0038197
GO:0005544	calcium-dependent phospholipid binding	molecular_function	0.24287	1	1	259	13	12231	FBgn0261090
GO:0005416	cation:amino acid symporter activity	molecular_function	0.24287	1	1	259	13	12231	FBgn0034911
GO:0007200	phospholipase C-activating G-protein coupled receptor signaling pathway	biological_process	0.24287	1	1	259	13	12231	FBgn0262738
GO:0007270	neuron-neuron synaptic transmission	biological_process	0.24287	1	1	259	13	12231	FBgn0083975
GO:0007527	adult somatic muscle development	biological_process	0.24287	1	1	259	13	12231	FBgn0264695
GO:0033202	DNA helicase complex	cellular_component	0.24287	1	1	259	13	12231	FBgn0086613
GO:0042734	presynaptic membrane	cellular_component	0.24287	1	1	259	13	12231	FBgn0001624
GO:0048082	regulation of adult chitin-containing cuticle pigmentation	biological_process	0.24287	1	1	259	13	12231	FBgn0261260
GO:0050806	positive regulation of synaptic transmission	biological_process	0.24287	1	1	259	13	12231	FBgn0038975
GO:2000179	positive regulation of neural precursor cell proliferation	biological_process	0.24287	1	1	259	13	12231	FBgn0013469
GO:2000648	positive regulation of stem cell proliferation	biological_process	0.24287	1	1	259	13	12231	FBgn0013469
GO:0007568	aging	biological_process	0.24333	1	5	259	158	12231	FBgn0259170,FBgn0038197,FBgn0263397,FBgn0262975,FBgn0038880
GO:1901701	cellular response to oxygen-containing compound	biological_process	0.24546	1	3	259	81	12231	FBgn0264490,FBgn0038197,FBgn0000210
GO:0030952	establishment or maintenance of cytoskeleton polarity	biological_process	0.24648	1	2	259	45	12231	FBgn0085408,FBgn0262975
GO:0031647	regulation of protein stability	biological_process	0.24648	1	2	259	45	12231	FBgn0259685,FBgn0264695
GO:0005667	transcription factor complex	cellular_component	0.24935	1	4	259	120	12231	FBgn0000413,FBgn0041092,FBgn0085432,FBgn0038197
GO:0051648	vesicle localization	biological_process	0.24935	1	4	259	120	12231	FBgn0261090,FBgn0003392,FBgn0038975,FBgn0260964
GO:0051336	regulation of hydrolase activity	biological_process	0.25088	1	3	259	82	12231	FBgn0264490,FBgn0264693,FBgn0028990
GO:0015294	solute:cation symporter activity	molecular_function	0.25107	1	3	259	82	12231	FBgn0259111,FBgn0034911,FBgn0038652
GO:0001104	RNA polymerase II transcription cofactor activity	molecular_function	0.25338	1	2	259	46	12231	FBgn0013531,FBgn0001139
GO:0007306	eggshell chorion assembly	biological_process	0.25684	1	3	259	83	12231	FBgn0003392,FBgn0038826,FBgn0014343
GO:0008483	transaminase activity	molecular_function	0.25849	1	1	259	14	12231	FBgn0030558
GO:0016769	transferase activity, transferring nitrogenous groups	molecular_function	0.25849	1	1	259	14	12231	FBgn0030558
GO:0042886	amide transport	biological_process	0.25858	1	1	259	14	12231	FBgn0023091
GO:0008585	female gonad development	biological_process	0.2586	1	1	259	14	12231	FBgn0031903
GO:0046545	development of primary female sexual characteristics	biological_process	0.2586	1	1	259	14	12231	FBgn0031903
GO:1903309	negative regulation of chromatin modification	biological_process	0.25878	1	1	259	14	12231	FBgn0261573
GO:0034705	potassium channel complex	cellular_component	0.25881	1	1	259	14	12231	FBgn0033494
GO:0051785	positive regulation of nuclear division	biological_process	0.25889	1	1	259	14	12231	FBgn0000114
GO:0030814	regulation of cAMP metabolic process	biological_process	0.2589	1	1	259	14	12231	FBgn0260753
GO:0030817	regulation of cAMP biosynthetic process	biological_process	0.2589	1	1	259	14	12231	FBgn0260753
GO:0045761	regulation of adenylate cyclase activity	biological_process	0.2589	1	1	259	14	12231	FBgn0260753
GO:0060857	establishment of glial blood-brain barrier	biological_process	0.25891	1	1	259	14	12231	FBgn0025631
GO:0007460	R8 cell fate commitment	biological_process	0.25891	1	1	259	14	12231	FBgn0000413
GO:0035019	somatic stem cell population maintenance	biological_process	0.25891	1	1	259	14	12231	FBgn0000413
GO:0004653	polypeptide N-acetylgalactosaminyltransferase activity	molecular_function	0.25891	1	1	259	14	12231	FBgn0031530
GO:0042387	plasmatocyte differentiation	biological_process	0.25891	1	1	259	14	12231	FBgn0001319
GO:0004559	alpha-mannosidase activity	molecular_function	0.25891	1	1	259	14	12231	FBgn0259170
GO:0017147	Wnt-protein binding	molecular_function	0.25891	1	1	259	14	12231	FBgn0041604
GO:0033059	cellular pigmentation	biological_process	0.25891	1	1	259	14	12231	FBgn0085408
GO:0048753	pigment granule organization	biological_process	0.25891	1	1	259	14	12231	FBgn0085408
GO:0001047	core promoter binding	molecular_function	0.25891	1	1	259	14	12231	FBgn0005624
GO:0006911	phagocytosis, engulfment	biological_process	0.25891	1	1	259	14	12231	FBgn0264490
GO:0007305	vitelline membrane formation involved in chorion-containing eggshell formation	biological_process	0.25891	1	1	259	14	12231	FBgn0039709
GO:0007564	regulation of chitin-based cuticle tanning	biological_process	0.25891	1	1	259	14	12231	FBgn0261260
GO:0008187	poly-pyrimidine tract binding	molecular_function	0.25891	1	1	259	14	12231	FBgn0086675
GO:0010324	membrane invagination	biological_process	0.25891	1	1	259	14	12231	FBgn0264490
GO:0030704	vitelline membrane formation	biological_process	0.25891	1	1	259	14	12231	FBgn0039709
GO:0035003	subapical complex	cellular_component	0.25891	1	1	259	14	12231	FBgn0259685
GO:0035803	egg coat formation	biological_process	0.25891	1	1	259	14	12231	FBgn0039709
GO:0045167	asymmetric protein localization involved in cell fate determination	biological_process	0.25891	1	1	259	14	12231	FBgn0001624
GO:0046068	cGMP metabolic process	biological_process	0.25891	1	1	259	14	12231	FBgn0264815
GO:0046958	nonassociative learning	biological_process	0.25891	1	1	259	14	12231	FBgn0000479
GO:0048800	antennal morphogenesis	biological_process	0.25891	1	1	259	14	12231	FBgn0003382
GO:0008380	RNA splicing	biological_process	0.2592	1	7	259	244	12231	FBgn0032388,FBgn0000114,FBgn0004587,FBgn0032194,FBgn0038826,FBgn0039920,FBgn0267791
GO:0043067	regulation of programmed cell death	biological_process	0.25924	1	5	259	162	12231	FBgn0264490,FBgn0003118,FBgn0000210,FBgn0262738,FBgn0013469
GO:0002683	negative regulation of immune system process	biological_process	0.26188	1	2	259	47	12231	FBgn0034070,FBgn0028990
GO:0000768	syncytium formation by plasma membrane fusion	biological_process	0.26224	1	2	259	47	12231	FBgn0038197,FBgn0028369
GO:0006949	syncytium formation	biological_process	0.26224	1	2	259	47	12231	FBgn0038197,FBgn0028369
GO:0007520	myoblast fusion	biological_process	0.26224	1	2	259	47	12231	FBgn0028369,FBgn0038197
GO:0015293	symporter activity	molecular_function	0.26249	1	3	259	84	12231	FBgn0259111,FBgn0034911,FBgn0038652
GO:0006342	chromatin silencing	biological_process	0.26256	1	3	259	84	12231	FBgn0025639,FBgn0020309,FBgn0005624
GO:0032403	protein complex binding	molecular_function	0.26326	1	5	259	163	12231	FBgn0019968,FBgn0052082,FBgn0264693,FBgn0003392,FBgn0259099
GO:0045814	negative regulation of gene expression, epigenetic	biological_process	0.2683	1	3	259	85	12231	FBgn0025639,FBgn0020309,FBgn0005624
GO:0030718	germ-line stem cell population maintenance	biological_process	0.27011	1	2	259	48	12231	FBgn0000114,FBgn0038197
GO:0007049	cell cycle	biological_process	0.27288	1	21	259	857	12231	FBgn0005624,FBgn0004587,FBgn0004635,FBgn0000559,FBgn0267727,FBgn0016694,FBgn0000413,FBgn0000182,FBgn0019968,FBgn0003392,FBgn0015600,FBgn0020309,FBgn0029881,FBgn0264693,FBgn0001624,FBgn0001320,FBgn0029157,FBgn0000114,FBgn0011826,FBgn0004859,FBgn0041111
GO:0090599	alpha-glucosidase activity	molecular_function	0.27401	1	1	259	15	12231	FBgn0002569
GO:0045926	negative regulation of growth	biological_process	0.27405	1	3	259	86	12231	FBgn0038197,FBgn0259685,FBgn0001075
GO:0030725	germline ring canal formation	biological_process	0.27443	1	1	259	15	12231	FBgn0267727
GO:0043967	histone H4 acetylation	biological_process	0.27448	1	1	259	15	12231	FBgn0261573
GO:0000226	microtubule cytoskeleton organization	biological_process	0.27459	1	11	259	419	12231	FBgn0001624,FBgn0264693,FBgn0000559,FBgn0267727,FBgn0262975,FBgn0019968,FBgn0000182,FBgn0000497,FBgn0038197,FBgn0015600,FBgn0001075
GO:0030799	regulation of cyclic nucleotide metabolic process	biological_process	0.2746	1	1	259	15	12231	FBgn0260753
GO:0030802	regulation of cyclic nucleotide biosynthetic process	biological_process	0.2746	1	1	259	15	12231	FBgn0260753
GO:0031279	regulation of cyclase activity	biological_process	0.2746	1	1	259	15	12231	FBgn0260753
GO:0001191	transcriptional repressor activity, RNA polymerase II transcription factor binding	molecular_function	0.27461	1	1	259	15	12231	FBgn0001139
GO:0035168	larval lymph gland hemocyte differentiation	biological_process	0.27462	1	1	259	15	12231	FBgn0001319
GO:0005254	chloride channel activity	molecular_function	0.27462	1	1	259	15	12231	FBgn0264908
GO:0016241	regulation of macroautophagy	biological_process	0.27462	1	1	259	15	12231	FBgn0038197
GO:0015923	mannosidase activity	molecular_function	0.27462	1	1	259	15	12231	FBgn0259170
GO:0006919	activation of cysteine-type endopeptidase activity involved in apoptotic process	biological_process	0.27462	1	1	259	15	12231	FBgn0264490
GO:0007522	visceral muscle development	biological_process	0.27462	1	1	259	15	12231	FBgn0028369
GO:0010591	regulation of lamellipodium assembly	biological_process	0.27462	1	1	259	15	12231	FBgn0029157
GO:0016247	channel regulator activity	molecular_function	0.27462	1	1	259	15	12231	FBgn0037766
GO:0016348	imaginal disc-derived leg joint morphogenesis	biological_process	0.27462	1	1	259	15	12231	FBgn0020307
GO:0019201	nucleotide kinase activity	molecular_function	0.27462	1	1	259	15	12231	FBgn0001624
GO:0031672	A band	cellular_component	0.27462	1	1	259	15	12231	FBgn0264695
GO:0048808	male genitalia morphogenesis	biological_process	0.27462	1	1	259	15	12231	FBgn0000210
GO:0050912	detection of chemical stimulus involved in sensory perception of taste	biological_process	0.27462	1	1	259	15	12231	FBgn0262738
GO:0051663	oocyte nucleus localization involved in oocyte dorsal/ventral axis specification	biological_process	0.27462	1	1	259	15	12231	FBgn0262975
GO:0090598	male anatomical structure morphogenesis	biological_process	0.27462	1	1	259	15	12231	FBgn0000210
GO:1902743	regulation of lamellipodium organization	biological_process	0.27462	1	1	259	15	12231	FBgn0029157
GO:0006810	transport	biological_process	0.27599	1	38	259	1624	12231	FBgn0264908,FBgn0259145,FBgn0034911,FBgn0038837,FBgn0034247,FBgn0259822,FBgn0263111,FBgn0036732,FBgn0259111,FBgn0261260,FBgn0260964,FBgn0037387,FBgn0041111,FBgn0020307,FBgn0028704,FBgn0032593,FBgn0261090,FBgn0004885,FBgn0030872,FBgn0038975,FBgn0267727,FBgn0003392,FBgn0033494,FBgn0015919,FBgn0032151,FBgn0023091,FBgn0003118,FBgn0038652,FBgn0013995,FBgn0263397,FBgn0260003,FBgn0264490,FBgn0051634,FBg…
GO:0001505	regulation of neurotransmitter levels	biological_process	0.27737	1	4	259	126	12231	FBgn0000024,FBgn0260003,FBgn0261090,FBgn0263111
GO:0052548	regulation of endopeptidase activity	biological_process	0.27765	1	2	259	49	12231	FBgn0028990,FBgn0264490
GO:0051302	regulation of cell division	biological_process	0.27957	1	3	259	87	12231	FBgn0013469,FBgn0000114,FBgn0001320
GO:0046486	glycerolipid metabolic process	biological_process	0.2796	1	3	259	87	12231	FBgn0085390,FBgn0032955,FBgn0262738
GO:0030162	regulation of proteolysis	biological_process	0.28187	1	4	259	127	12231	FBgn0264815,FBgn0264490,FBgn0028990,FBgn0259685
GO:0097458	neuron part	cellular_component	0.28454	1	8	259	294	12231	FBgn0266098,FBgn0261090,FBgn0001624,FBgn0260753,FBgn0263111,FBgn0264607,FBgn0259099,FBgn0260964
GO:0000278	mitotic cell cycle	biological_process	0.28523	1	15	259	598	12231	FBgn0000114,FBgn0003392,FBgn0004859,FBgn0015600,FBgn0005624,FBgn0004587,FBgn0004635,FBgn0020309,FBgn0016694,FBgn0000559,FBgn0000413,FBgn0001624,FBgn0029157,FBgn0001320,FBgn0000182
GO:0061640	cytoskeleton-dependent cytokinesis	biological_process	0.28555	1	3	259	88	12231	FBgn0041111,FBgn0003392,FBgn0004635
GO:0015077	monovalent inorganic cation transmembrane transporter activity	molecular_function	0.28903	1	7	259	253	12231	FBgn0263397,FBgn0033494,FBgn0259111,FBgn0034911,FBgn0013995,FBgn0028704,FBgn0038652
GO:0003723	RNA binding	molecular_function	0.2897	1	11	259	425	12231	FBgn0267791,FBgn0000557,FBgn0000114,FBgn0264001,FBgn0086675,FBgn0038826,FBgn0052423,FBgn0039920,FBgn0004587,FBgn0000182,FBgn0000559
GO:0043063	intercellular bridge organization	biological_process	0.28981	1	1	259	16	12231	FBgn0267727
GO:0003383	apical constriction	biological_process	0.28995	1	1	259	16	12231	FBgn0039704
GO:0001964	startle response	biological_process	0.28996	1	1	259	16	12231	FBgn0005630
GO:0051781	positive regulation of cell division	biological_process	0.28996	1	1	259	16	12231	FBgn0000114
GO:0030808	regulation of nucleotide biosynthetic process	biological_process	0.28998	1	1	259	16	12231	FBgn0260753
GO:0051339	regulation of lyase activity	biological_process	0.28998	1	1	259	16	12231	FBgn0260753
GO:1900371	regulation of purine nucleotide biosynthetic process	biological_process	0.28998	1	1	259	16	12231	FBgn0260753
GO:0060856	establishment of blood-brain barrier	biological_process	0.28998	1	1	259	16	12231	FBgn0025631
GO:0016185	synaptic vesicle budding from presynaptic membrane	biological_process	0.28999	1	1	259	16	12231	FBgn0003392
GO:0060025	regulation of synaptic activity	biological_process	0.28999	1	1	259	16	12231	FBgn0038837
GO:0060259	regulation of feeding behavior	biological_process	0.28999	1	1	259	16	12231	FBgn0038197
GO:0070142	synaptic vesicle budding	biological_process	0.28999	1	1	259	16	12231	FBgn0003392
GO:0001710	mesodermal cell fate commitment	biological_process	0.28999	1	1	259	16	12231	FBgn0085432
GO:0007412	axon target recognition	biological_process	0.28999	1	1	259	16	12231	FBgn0010575
GO:0007519	skeletal muscle tissue development	biological_process	0.28999	1	1	259	16	12231	FBgn0264693
GO:0009649	entrainment of circadian clock	biological_process	0.28999	1	1	259	16	12231	FBgn0262738
GO:0010959	regulation of metal ion transport	biological_process	0.28999	1	1	259	16	12231	FBgn0037766
GO:0015179	L-amino acid transmembrane transporter activity	molecular_function	0.28999	1	1	259	16	12231	FBgn0034911
GO:0015238	drug transmembrane transporter activity	molecular_function	0.28999	1	1	259	16	12231	FBgn0260964
GO:0019216	regulation of lipid metabolic process	biological_process	0.28999	1	1	259	16	12231	FBgn0016694
GO:0043052	thermotaxis	biological_process	0.28999	1	1	259	16	12231	FBgn0262738
GO:0048079	regulation of cuticle pigmentation	biological_process	0.28999	1	1	259	16	12231	FBgn0261260
GO:0048085	adult chitin-containing cuticle pigmentation	biological_process	0.28999	1	1	259	16	12231	FBgn0261260
GO:0048333	mesodermal cell differentiation	biological_process	0.28999	1	1	259	16	12231	FBgn0085432
GO:0048634	regulation of muscle organ development	biological_process	0.28999	1	1	259	16	12231	FBgn0028369
GO:0090484	drug transporter activity	molecular_function	0.28999	1	1	259	16	12231	FBgn0260964
GO:0097202	activation of cysteine-type endopeptidase activity	biological_process	0.28999	1	1	259	16	12231	FBgn0264490
GO:0010243	response to organonitrogen compound	biological_process	0.29137	1	3	259	89	12231	FBgn0000024,FBgn0038197,FBgn0025631
GO:0004721	phosphoprotein phosphatase activity	molecular_function	0.29137	1	3	259	89	12231	FBgn0011826,FBgn0032749,FBgn0029157
GO:0060548	negative regulation of cell death	biological_process	0.29137	1	3	259	89	12231	FBgn0000108,FBgn0003118,FBgn0262738
GO:0051606	detection of stimulus	biological_process	0.29306	1	6	259	212	12231	FBgn0262738,FBgn0259234,FBgn0032593,FBgn0013995,FBgn0263111,FBgn0041604
GO:0007291	sperm individualization	biological_process	0.29366	1	2	259	51	12231	FBgn0267727,FBgn0003392
GO:0006479	protein methylation	biological_process	0.29369	1	2	259	51	12231	FBgn0261573,FBgn0025639
GO:0008213	protein alkylation	biological_process	0.29369	1	2	259	51	12231	FBgn0261573,FBgn0025639
GO:0036465	synaptic vesicle recycling	biological_process	0.29376	1	2	259	51	12231	FBgn0003392,FBgn0038975
GO:0048488	synaptic vesicle endocytosis	biological_process	0.29376	1	2	259	51	12231	FBgn0003392,FBgn0038975
GO:0071478	cellular response to radiation	biological_process	0.29376	1	2	259	51	12231	FBgn0259234,FBgn0262738
GO:0043900	regulation of multi-organism process	biological_process	0.29633	1	4	259	130	12231	FBgn0001624,FBgn0262975,FBgn0264607,FBgn0003117
GO:0071826	ribonucleoprotein complex subunit organization	biological_process	0.30126	1	2	259	52	12231	FBgn0004587,FBgn0032194
GO:0000281	mitotic cytokinesis	biological_process	0.30156	1	2	259	52	12231	FBgn0004635,FBgn0003392
GO:0048134	germ-line cyst formation	biological_process	0.3016	1	2	259	52	12231	FBgn0000114,FBgn0003392
GO:0006730	one-carbon metabolic process	biological_process	0.30377	1	1	259	17	12231	FBgn0027844
GO:0015926	glucosidase activity	molecular_function	0.30445	1	1	259	17	12231	FBgn0002569
GO:0000245	spliceosomal complex assembly	biological_process	0.30476	1	1	259	17	12231	FBgn0004587
GO:0007303	cytoplasmic transport, nurse cell to oocyte	biological_process	0.30486	1	1	259	17	12231	FBgn0267727
GO:1900542	regulation of purine nucleotide metabolic process	biological_process	0.30502	1	1	259	17	12231	FBgn0260753
GO:0009312	oligosaccharide biosynthetic process	biological_process	0.30503	1	1	259	17	12231	FBgn0031530
GO:0080019	fatty-acyl-CoA reductase (alcohol-forming) activity	molecular_function	0.30503	1	1	259	17	12231	FBgn0034145
GO:0006487	protein N-linked glycosylation	biological_process	0.30503	1	1	259	17	12231	FBgn0259170
GO:0032104	regulation of response to extracellular stimulus	biological_process	0.30503	1	1	259	17	12231	FBgn0038197
GO:0032107	regulation of response to nutrient levels	biological_process	0.30503	1	1	259	17	12231	FBgn0038197
GO:0046626	regulation of insulin receptor signaling pathway	biological_process	0.30503	1	1	259	17	12231	FBgn0038197
GO:1900076	regulation of cellular response to insulin stimulus	biological_process	0.30503	1	1	259	17	12231	FBgn0038197
GO:0006032	chitin catabolic process	biological_process	0.30503	1	1	259	17	12231	FBgn0263132
GO:0006638	neutral lipid metabolic process	biological_process	0.30503	1	1	259	17	12231	FBgn0262738
GO:0006639	acylglycerol metabolic process	biological_process	0.30503	1	1	259	17	12231	FBgn0262738
GO:0007370	ventral furrow formation	biological_process	0.30503	1	1	259	17	12231	FBgn0023172
GO:0007559	histolysis	biological_process	0.30503	1	1	259	17	12231	FBgn0000210
GO:0009826	unidimensional cell growth	biological_process	0.30503	1	1	259	17	12231	FBgn0023172
GO:0016271	tissue death	biological_process	0.30503	1	1	259	17	12231	FBgn0000210
GO:0016278	lysine N-methyltransferase activity	molecular_function	0.30503	1	1	259	17	12231	FBgn0025639
GO:0016279	protein-lysine N-methyltransferase activity	molecular_function	0.30503	1	1	259	17	12231	FBgn0025639
GO:0018024	histone-lysine N-methyltransferase activity	molecular_function	0.30503	1	1	259	17	12231	FBgn0025639
GO:0035112	genitalia morphogenesis	biological_process	0.30503	1	1	259	17	12231	FBgn0000210
GO:0043280	positive regulation of cysteine-type endopeptidase activity involved in apoptotic process	biological_process	0.30503	1	1	259	17	12231	FBgn0264490
GO:0046348	amino sugar catabolic process	biological_process	0.30503	1	1	259	17	12231	FBgn0263132
GO:1900073	regulation of neuromuscular synaptic transmission	biological_process	0.30503	1	1	259	17	12231	FBgn0038975
GO:1901072	glucosamine-containing compound catabolic process	biological_process	0.30503	1	1	259	17	12231	FBgn0263132
GO:0001076	transcription factor activity, RNA polymerase II transcription factor binding	molecular_function	0.30847	1	2	259	53	12231	FBgn0001139,FBgn0013531
GO:0003713	transcription coactivator activity	molecular_function	0.30848	1	2	259	53	12231	FBgn0041092,FBgn0013531
GO:0052547	regulation of peptidase activity	biological_process	0.30909	1	2	259	53	12231	FBgn0264490,FBgn0028990
GO:0030425	dendrite	cellular_component	0.30945	1	2	259	53	12231	FBgn0259099,FBgn0264607
GO:0023061	signal release	biological_process	0.31055	1	4	259	133	12231	FBgn0260003,FBgn0261090,FBgn0263111,FBgn0023091
GO:0007015	actin filament organization	biological_process	0.31065	1	4	259	133	12231	FBgn0264272,FBgn0001139,FBgn0029157,FBgn0023172
GO:0043473	pigmentation	biological_process	0.31458	1	3	259	93	12231	FBgn0000179,FBgn0085408,FBgn0261260
GO:0005496	steroid binding	molecular_function	0.31908	1	1	259	18	12231	FBgn0035849
GO:0035290	trunk segmentation	biological_process	0.31916	1	1	259	18	12231	FBgn0001320
GO:0045476	nurse cell apoptotic process	biological_process	0.31974	1	1	259	18	12231	FBgn0005630
GO:0001085	RNA polymerase II transcription factor binding	molecular_function	0.31976	1	1	259	18	12231	FBgn0003117
GO:0007380	specification of segmental identity, head	biological_process	0.31976	1	1	259	18	12231	FBgn0001319
GO:0007526	larval somatic muscle development	biological_process	0.31976	1	1	259	18	12231	FBgn0001319
GO:0035166	post-embryonic hemopoiesis	biological_process	0.31976	1	1	259	18	12231	FBgn0001319
GO:0035167	larval lymph gland hemopoiesis	biological_process	0.31976	1	1	259	18	12231	FBgn0001319
GO:0035289	posterior head segmentation	biological_process	0.31976	1	1	259	18	12231	FBgn0001319
GO:0045792	negative regulation of cell size	biological_process	0.31976	1	1	259	18	12231	FBgn0038197
GO:0003697	single-stranded DNA binding	molecular_function	0.31976	1	1	259	18	12231	FBgn0011481
GO:0005913	cell-cell adherens junction	cellular_component	0.31976	1	1	259	18	12231	FBgn0259685
GO:0007483	genital disc morphogenesis	biological_process	0.31976	1	1	259	18	12231	FBgn0005677
GO:0007562	eclosion	biological_process	0.31976	1	1	259	18	12231	FBgn0000210
GO:0008543	fibroblast growth factor receptor signaling pathway	biological_process	0.31976	1	1	259	18	12231	FBgn0020299
GO:0008594	photoreceptor cell morphogenesis	biological_process	0.31976	1	1	259	18	12231	FBgn0259685
GO:0030539	male genitalia development	biological_process	0.31976	1	1	259	18	12231	FBgn0000210
GO:0044344	cellular response to fibroblast growth factor stimulus	biological_process	0.31976	1	1	259	18	12231	FBgn0020299
GO:0060795	cell fate commitment involved in formation of primary germ layer	biological_process	0.31976	1	1	259	18	12231	FBgn0085432
GO:0071774	response to fibroblast growth factor	biological_process	0.31976	1	1	259	18	12231	FBgn0020299
GO:1901215	negative regulation of neuron death	biological_process	0.31976	1	1	259	18	12231	FBgn0000108
GO:2001056	positive regulation of cysteine-type endopeptidase activity	biological_process	0.31976	1	1	259	18	12231	FBgn0264490
GO:0090407	organophosphate biosynthetic process	biological_process	0.32477	1	5	259	178	12231	FBgn0085390,FBgn0260753,FBgn0032955,FBgn0262738,FBgn0038197
GO:0003777	microtubule motor activity	molecular_function	0.32508	1	2	259	55	12231	FBgn0019968,FBgn0003392
GO:0098655	cation transmembrane transport	biological_process	0.3262	1	3	259	95	12231	FBgn0032593,FBgn0259822,FBgn0263111
GO:0098662	inorganic cation transmembrane transport	biological_process	0.3262	1	3	259	95	12231	FBgn0263111,FBgn0032593,FBgn0259822
GO:0007017	microtubule-based process	biological_process	0.32982	1	13	259	529	12231	FBgn0038197,FBgn0000497,FBgn0000182,FBgn0262975,FBgn0019968,FBgn0267727,FBgn0000559,FBgn0001624,FBgn0264693,FBgn0001075,FBgn0259099,FBgn0003392,FBgn0015600
GO:0022402	cell cycle process	biological_process	0.33218	1	17	259	709	12231	FBgn0001320,FBgn0001624,FBgn0264693,FBgn0029881,FBgn0041111,FBgn0011826,FBgn0000114,FBgn0004859,FBgn0000182,FBgn0019968,FBgn0267727,FBgn0000559,FBgn0016694,FBgn0004635,FBgn0004587,FBgn0015600,FBgn0003392
GO:0007605	sensory perception of sound	biological_process	0.33286	1	2	259	56	12231	FBgn0033504,FBgn0259099
GO:0098722	asymmetric stem cell division	biological_process	0.33286	1	2	259	56	12231	FBgn0001624,FBgn0261451
GO:0006006	glucose metabolic process	biological_process	0.33362	1	1	259	19	12231	FBgn0002569
GO:0006140	regulation of nucleotide metabolic process	biological_process	0.33417	1	1	259	19	12231	FBgn0260753
GO:0000915	actomyosin contractile ring assembly	biological_process	0.33418	1	1	259	19	12231	FBgn0041111
GO:0004568	chitinase activity	molecular_function	0.33418	1	1	259	19	12231	FBgn0263132
GO:0007475	apposition of dorsal and ventral imaginal disc-derived wing surfaces	biological_process	0.33418	1	1	259	19	12231	FBgn0000244
GO:0007593	chitin-based cuticle sclerotization	biological_process	0.33418	1	1	259	19	12231	FBgn0261260
GO:0010950	positive regulation of endopeptidase activity	biological_process	0.33418	1	1	259	19	12231	FBgn0264490
GO:0031638	zymogen activation	biological_process	0.33418	1	1	259	19	12231	FBgn0264490
GO:0035096	larval midgut cell programmed cell death	biological_process	0.33418	1	1	259	19	12231	FBgn0264490
GO:0040040	thermosensory behavior	biological_process	0.33418	1	1	259	19	12231	FBgn0000479
GO:0042675	compound eye cone cell differentiation	biological_process	0.33418	1	1	259	19	12231	FBgn0266098
GO:0044837	actomyosin contractile ring organization	biological_process	0.33418	1	1	259	19	12231	FBgn0041111
GO:0070851	growth factor receptor binding	molecular_function	0.33418	1	1	259	19	12231	FBgn0001624
GO:0071214	cellular response to abiotic stimulus	biological_process	0.34062	1	2	259	57	12231	FBgn0259234,FBgn0262738
GO:0008219	cell death	biological_process	0.34094	1	8	259	312	12231	FBgn0003118,FBgn0003392,FBgn0013469,FBgn0000210,FBgn0262738,FBgn0264490,FBgn0000108,FBgn0005630
GO:0005794	Golgi apparatus	cellular_component	0.34165	1	5	259	182	12231	FBgn0040271,FBgn0031530,FBgn0004635,FBgn0004509,FBgn0259170
GO:0009072	aromatic amino acid family metabolic process	biological_process	0.34792	1	1	259	20	12231	FBgn0030558
GO:0045861	negative regulation of proteolysis	biological_process	0.34798	1	2	259	58	12231	FBgn0259685,FBgn0028990
GO:1903532	positive regulation of secretion by cell	biological_process	0.348	1	1	259	20	12231	FBgn0023091
GO:0051260	protein homooligomerization	biological_process	0.34803	1	1	259	20	12231	FBgn0034636
GO:0090288	negative regulation of cellular response to growth factor stimulus	biological_process	0.34821	1	1	259	20	12231	FBgn0039932
GO:0006378	mRNA polyadenylation	biological_process	0.34827	1	1	259	20	12231	FBgn0000114
GO:0008376	acetylgalactosaminyltransferase activity	molecular_function	0.34829	1	1	259	20	12231	FBgn0031530
GO:0015108	chloride transmembrane transporter activity	molecular_function	0.34829	1	1	259	20	12231	FBgn0264908
GO:0008101	decapentaplegic signaling pathway	biological_process	0.34829	1	1	259	20	12231	FBgn0041604
GO:0000912	assembly of actomyosin apparatus involved in cytokinesis	biological_process	0.34829	1	1	259	20	12231	FBgn0041111
GO:0000980	RNA polymerase II distal enhancer sequence-specific DNA binding	molecular_function	0.34829	1	1	259	20	12231	FBgn0004859
GO:0007390	germ-band shortening	biological_process	0.34829	1	1	259	20	12231	FBgn0003499
GO:0008227	G-protein coupled amine receptor activity	molecular_function	0.34829	1	1	259	20	12231	FBgn0261929
GO:0010952	positive regulation of peptidase activity	biological_process	0.34829	1	1	259	20	12231	FBgn0264490
GO:0032435	negative regulation of proteasomal ubiquitin-dependent protein catabolic process	biological_process	0.34829	1	1	259	20	12231	FBgn0259685
GO:0042177	negative regulation of protein catabolic process	biological_process	0.34829	1	1	259	20	12231	FBgn0259685
GO:0046785	microtubule polymerization	biological_process	0.34829	1	1	259	20	12231	FBgn0264693
GO:0051299	centrosome separation	biological_process	0.34829	1	1	259	20	12231	FBgn0264693
GO:1901799	negative regulation of proteasomal protein catabolic process	biological_process	0.34829	1	1	259	20	12231	FBgn0259685
GO:1903051	negative regulation of proteolysis involved in cellular protein catabolic process	biological_process	0.34829	1	1	259	20	12231	FBgn0259685
GO:1903363	negative regulation of cellular protein catabolic process	biological_process	0.34829	1	1	259	20	12231	FBgn0259685
[truncated: 770 more rows]

## Sheet: GO terms_Cag_Que
Enriched GO terms for DE miRNAs in oviposition inhibition process
GO_accession	Description	Term_type	Over_represented_pValue	Corrected_pValue	DEG_item	DEG_list	Bg_item	Bg_list	Gene_names
GO:0048513	organ development	biological_process	2.1482e-33	2.0981e-29	98	261	1228	12231	FBgn0000413,FBgn0013469,FBgn0259481,FBgn0010113,FBgn0263077,FBgn0015609,FBgn0004198,FBgn0033504,FBgn0262738,FBgn0000633,FBgn0266411,FBgn0004606,FBgn0036257,FBgn0034070,FBgn0051145,FBgn0023172,FBgn0260799,FBgn0013433,FBgn0000179,FBgn0004795,FBgn0033438,FBgn0261574,FBgn0267791,FBgn0015919,FBgn0003041,FBgn0000244,FBgn0011259,FBgn0265487,FBgn0263930,FBgn0265998,FBgn0011817,FBgn0019650,FBgn0004666,FBg…
GO:0009653	anatomical structure morphogenesis	biological_process	5.4945e-30	2.6832e-26	110	261	1692	12231	FBgn0083981,FBgn0262139,FBgn0026189,FBgn0250823,FBgn0005630,FBgn0040271,FBgn0001320,FBgn0028704,FBgn0001319,FBgn0039081,FBgn0000108,FBgn0000464,FBgn0033159,FBgn0003118,FBgn0020269,FBgn0260003,FBgn0024189,FBgn0264695,FBgn0086898,FBgn0038197,FBgn0000114,FBgn0263289,FBgn0025936,FBgn0041092,FBgn0000636,FBgn0263706,FBgn0267336,FBgn0262975,FBgn0001078,FBgn0259984,FBgn0265296,FBgn0035798,FBgn0028979,FBg…
GO:0048731	system development	biological_process	1.4464e-28	4.7089e-25	124	261	2199	12231	FBgn0263289,FBgn0041092,FBgn0025936,FBgn0000636,FBgn0267336,FBgn0263706,FBgn0262975,FBgn0259984,FBgn0001078,FBgn0040318,FBgn0028979,FBgn0004102,FBgn0265296,FBgn0035798,FBgn0004878,FBgn0045852,FBgn0051352,FBgn0260439,FBgn0028369,FBgn0003944,FBgn0034876,FBgn0003651,FBgn0020251,FBgn0264272,FBgn0010909,FBgn0027932,FBgn0086758,FBgn0027596,FBgn0021764,FBgn0083963,FBgn0261811,FBgn0083981,FBgn0026189,FBg…
GO:0009887	organ morphogenesis	biological_process	2.4562e-28	5.9975e-25	73	261	783	12231	FBgn0086758,FBgn0027932,FBgn0021764,FBgn0264272,FBgn0020251,FBgn0010909,FBgn0003651,FBgn0003944,FBgn0034876,FBgn0028369,FBgn0004102,FBgn0001078,FBgn0259984,FBgn0263706,FBgn0267336,FBgn0000636,FBgn0263289,FBgn0000114,FBgn0038197,FBgn0086898,FBgn0024189,FBgn0260003,FBgn0000464,FBgn0003118,FBgn0001319,FBgn0250823,FBgn0005630,FBgn0262139,FBgn0000413,FBgn0010113,FBgn0259481,FBgn0013469,FBgn0263077,FBg…
GO:0065007	biological regulation	biological_process	3.2425e-25	6.3338e-22	149	261	3304	12231	FBgn0004797,FBgn0259171,FBgn0020269,FBgn0260003,FBgn0053531,FBgn0011666,FBgn0014870,FBgn0086675,FBgn0033313,FBgn0083981,FBgn0032330,FBgn0261811,FBgn0038975,FBgn0033159,FBgn0000464,FBgn0003118,FBgn0000567,FBgn0259145,FBgn0263995,FBgn0250823,FBgn0050361,FBgn0262562,FBgn0004878,FBgn0030366,FBgn0264490,FBgn0029881,FBgn0021764,FBgn0020251,FBgn0264272,FBgn0010909,FBgn0003651,FBgn0035849,FBgn0041092,FBg…
GO:0050794	regulation of cellular process	biological_process	4.4866e-25	7.3035e-22	136	261	2820	12231	FBgn0261811,FBgn0083981,FBgn0032330,FBgn0033313,FBgn0086675,FBgn0014870,FBgn0263995,FBgn0259145,FBgn0250823,FBgn0000464,FBgn0033159,FBgn0003118,FBgn0038975,FBgn0000567,FBgn0260003,FBgn0259171,FBgn0020269,FBgn0004797,FBgn0011666,FBgn0053531,FBgn0264707,FBgn0035849,FBgn0041092,FBgn0262975,FBgn0028979,FBgn0259984,FBgn0040318,FBgn0264490,FBgn0004878,FBgn0262562,FBgn0050361,FBgn0030366,FBgn0003651,FBg…
GO:0050789	regulation of biological process	biological_process	1.0642e-24	1.4849e-21	141	261	3031	12231	FBgn0265597,FBgn0004842,FBgn0267791,FBgn0003041,FBgn0015919,FBgn0004795,FBgn0033438,FBgn0013334,FBgn0042696,FBgn0034070,FBgn0004606,FBgn0015609,FBgn0004198,FBgn0263772,FBgn0262738,FBgn0039916,FBgn0260658,FBgn0000413,FBgn0003145,FBgn0263111,FBgn0259481,FBgn0000210,FBgn0037363,FBgn0261963,FBgn0000229,FBgn0037130,FBgn0003731,FBgn0003507,FBgn0263197,FBgn0033791,FBgn0086613,FBgn0266084,FBgn0029157,FBg…
GO:0048699	generation of neurons	biological_process	9.1892e-24	1.1219e-20	70	261	854	12231	FBgn0015609,FBgn0004198,FBgn0028645,FBgn0004606,FBgn0031955,FBgn0000413,FBgn0013469,FBgn0010113,FBgn0259481,FBgn0035101,FBgn0004795,FBgn0013433,FBgn0003041,FBgn0023172,FBgn0034070,FBgn0001139,FBgn0004666,FBgn0004635,FBgn0001624,FBgn0029157,FBgn0000253,FBgn0004509,FBgn0011259,FBgn0265487,FBgn0263930,FBgn0265998,FBgn0260934,FBgn0011481,FBgn0000229,FBgn0004839,FBgn0000210,FBgn0261963,FBgn0033791,FBg…
GO:0030182	neuron differentiation	biological_process	1.363e-23	1.4791e-20	67	261	788	12231	FBgn0001319,FBgn0039081,FBgn0033159,FBgn0003118,FBgn0000464,FBgn0000108,FBgn0005630,FBgn0028704,FBgn0040271,FBgn0001320,FBgn0026189,FBgn0262139,FBgn0083981,FBgn0038197,FBgn0086898,FBgn0259984,FBgn0001078,FBgn0040318,FBgn0004102,FBgn0265296,FBgn0035798,FBgn0262975,FBgn0041092,FBgn0025936,FBgn0000636,FBgn0263289,FBgn0010909,FBgn0264272,FBgn0027596,FBgn0086758,FBgn0021764,FBgn0003651,FBgn0051352,FBg…
GO:0044707	single-multicellular organism process	biological_process	1.6027e-23	1.5654e-20	146	261	3305	12231	FBgn0003731,FBgn0003507,FBgn0033791,FBgn0266084,FBgn0000210,FBgn0261963,FBgn0000229,FBgn0037130,FBgn0011817,FBgn0265998,FBgn0004509,FBgn0263930,FBgn0265487,FBgn0011259,FBgn0029157,FBgn0000253,FBgn0004666,FBgn0052600,FBgn0260749,FBgn0011826,FBgn0051145,FBgn0034070,FBgn0083975,FBgn0034286,FBgn0265597,FBgn0267791,FBgn0003041,FBgn0015919,FBgn0035101,FBgn0013433,FBgn0033438,FBgn0004795,FBgn0011754,FBg…
GO:0009888	tissue development	biological_process	2.3194e-23	2.0594e-20	80	261	1124	12231	FBgn0011481,FBgn0260934,FBgn0034408,FBgn0000229,FBgn0000210,FBgn0261963,FBgn0260397,FBgn0266084,FBgn0261563,FBgn0003731,FBgn0003507,FBgn0003382,FBgn0004666,FBgn0011826,FBgn0004914,FBgn0260798,FBgn0266465,FBgn0004635,FBgn0001624,FBgn0000157,FBgn0000244,FBgn0263930,FBgn0265487,FBgn0011817,FBgn0019650,FBgn0263705,FBgn0000179,FBgn0033438,FBgn0261574,FBgn0267791,FBgn0015919,FBgn0003041,FBgn0023172,FBg…
GO:0007275	multicellular organismal development	biological_process	3.4785e-23	2.8312e-20	131	261	2759	12231	FBgn0263706,FBgn0004102,FBgn0035798,FBgn0001078,FBgn0263289,FBgn0000636,FBgn0025936,FBgn0003944,FBgn0260439,FBgn0028369,FBgn0086758,FBgn0027596,FBgn0027932,FBgn0026238,FBgn0036985,FBgn0045852,FBgn0001320,FBgn0040271,FBgn0005630,FBgn0000108,FBgn0001319,FBgn0039081,FBgn0262139,FBgn0000114,FBgn0038197,FBgn0086898,FBgn0264695,FBgn0024189,FBgn0001139,FBgn0260799,FBgn0023172,FBgn0040752,FBgn0261574,FBg…
GO:0005515	protein binding	molecular_function	4.2161e-23	3.1676e-20	138	261	3026	12231	FBgn0011259,FBgn0263930,FBgn0029157,FBgn0000253,FBgn0004666,FBgn0261802,FBgn0011826,FBgn0260749,FBgn0052600,FBgn0003731,FBgn0003507,FBgn0026076,FBgn0263197,FBgn0266084,FBgn0263219,FBgn0000210,FBgn0261963,FBgn0037130,FBgn0000229,FBgn0263077,FBgn0000413,FBgn0259481,FBgn0000633,FBgn0025833,FBgn0033504,FBgn0015609,FBgn0028645,FBgn0000024,FBgn0262738,FBgn0039013,FBgn0083975,FBgn0034286,FBgn0034070,FBg…
GO:0048856	anatomical structure development	biological_process	5.7268e-23	3.9953e-20	137	261	2997	12231	FBgn0024189,FBgn0086898,FBgn0264695,FBgn0038197,FBgn0000114,FBgn0262139,FBgn0001319,FBgn0039081,FBgn0000108,FBgn0005630,FBgn0001320,FBgn0040271,FBgn0045852,FBgn0036985,FBgn0027932,FBgn0027596,FBgn0086758,FBgn0026238,FBgn0260439,FBgn0028369,FBgn0003944,FBgn0025936,FBgn0000636,FBgn0263289,FBgn0001078,FBgn0004102,FBgn0035798,FBgn0263706,FBgn0004914,FBgn0000157,FBgn0260798,FBgn0001624,FBgn0266465,FBg…
GO:0048468	cell development	biological_process	2.2638e-22	1.474e-19	89	261	1419	12231	FBgn0004635,FBgn0001624,FBgn0029157,FBgn0000253,FBgn0004666,FBgn0260749,FBgn0265998,FBgn0004509,FBgn0011259,FBgn0263930,FBgn0265487,FBgn0037363,FBgn0000210,FBgn0261963,FBgn0011481,FBgn0260934,FBgn0000229,FBgn0004839,FBgn0003731,FBgn0003507,FBgn0033791,FBgn0260397,FBgn0266084,FBgn0266411,FBgn0004606,FBgn0031955,FBgn0015609,FBgn0004198,FBgn0028645,FBgn0262738,FBgn0025391,FBgn0000413,FBgn0013469,FBg…
GO:0060429	epithelium development	biological_process	1.2067e-21	7.366e-19	73	261	1007	12231	FBgn0003651,FBgn0034876,FBgn0003944,FBgn0026238,FBgn0086758,FBgn0029881,FBgn0027932,FBgn0036985,FBgn0020251,FBgn0264272,FBgn0010909,FBgn0263289,FBgn0000636,FBgn0041092,FBgn0263706,FBgn0267336,FBgn0004102,FBgn0028979,FBgn0259984,FBgn0001078,FBgn0260003,FBgn0264695,FBgn0086898,FBgn0004797,FBgn0000114,FBgn0038197,FBgn0261811,FBgn0262139,FBgn0001320,FBgn0250823,FBgn0005630,FBgn0003118,FBgn0001319,FBg…
GO:0035295	tube development	biological_process	3.3567e-21	1.9285e-18	63	261	772	12231	FBgn0003118,FBgn0260397,FBgn0039081,FBgn0001319,FBgn0266084,FBgn0261563,FBgn0003731,FBgn0003382,FBgn0003507,FBgn0005630,FBgn0000229,FBgn0260934,FBgn0011481,FBgn0262139,FBgn0004839,FBgn0261811,FBgn0261963,FBgn0000244,FBgn0263930,FBgn0265487,FBgn0000114,FBgn0011817,FBgn0038197,FBgn0019650,FBgn0086898,FBgn0004797,FBgn0004666,FBgn0011826,FBgn0266465,FBgn0004635,FBgn0001624,FBgn0260798,FBgn0000157,FBg…
GO:0030030	cell projection organization	biological_process	5.2452e-21	2.8461e-18	59	261	684	12231	FBgn0029157,FBgn0000253,FBgn0004635,FBgn0052082,FBgn0004666,FBgn0086898,FBgn0038197,FBgn0263930,FBgn0011259,FBgn0261963,FBgn0083981,FBgn0000210,FBgn0026189,FBgn0262139,FBgn0004839,FBgn0000229,FBgn0011481,FBgn0260934,FBgn0003382,FBgn0005630,FBgn0028704,FBgn0040271,FBgn0001320,FBgn0003731,FBgn0039081,FBgn0001319,FBgn0000108,FBgn0033791,FBgn0033159,FBgn0000464,FBgn0031955,FBgn0004606,FBgn0051352,FBg…
GO:0032501	multicellular organismal process	biological_process	8.6653e-21	4.4544e-18	152	261	3755	12231	FBgn0013469,FBgn0010113,FBgn0262477,FBgn0023094,FBgn0036257,FBgn0003372,FBgn0031955,FBgn0266411,FBgn0040752,FBgn0023172,FBgn0001139,FBgn0260799,FBgn0000179,FBgn0264815,FBgn0263705,FBgn0261574,FBgn0000244,FBgn0019650,FBgn0017561,FBgn0000157,FBgn0260798,FBgn0004635,FBgn0266465,FBgn0001624,FBgn0261563,FBgn0260397,FBgn0264908,FBgn0053481,FBgn0003382,FBgn0032252,FBgn0004839,FBgn0011481,FBgn0260934,FBg…
GO:0032502	developmental process	biological_process	1.4194e-20	6.9315e-18	141	261	3327	12231	FBgn0040752,FBgn0023172,FBgn0001139,FBgn0260799,FBgn0000179,FBgn0263705,FBgn0261574,FBgn0013469,FBgn0010113,FBgn0023094,FBgn0036257,FBgn0031955,FBgn0266411,FBgn0261563,FBgn0260397,FBgn0264908,FBgn0003382,FBgn0004839,FBgn0032252,FBgn0260934,FBgn0011481,FBgn0038341,FBgn0034408,FBgn0000244,FBgn0019650,FBgn0004914,FBgn0000157,FBgn0260798,FBgn0266465,FBgn0263980,FBgn0001624,FBgn0004635,FBgn0001078,FBg…
GO:0002009	morphogenesis of an epithelium	biological_process	3.2126e-20	1.4942e-17	56	261	640	12231	FBgn0004198,FBgn0015609,FBgn0036257,FBgn0000633,FBgn0020251,FBgn0264272,FBgn0010909,FBgn0010113,FBgn0027932,FBgn0086758,FBgn0263077,FBgn0034876,FBgn0003944,FBgn0003651,FBgn0033438,FBgn0000179,FBgn0000636,FBgn0263705,FBgn0015919,FBgn0003041,FBgn0261574,FBgn0263289,FBgn0001078,FBgn0028979,FBgn0004102,FBgn0023172,FBgn0051145,FBgn0267336,FBgn0263706,FBgn0086898,FBgn0260003,FBgn0000157,FBgn0260798,FBg…
GO:0044767	single-organism developmental process	biological_process	4.2359e-20	1.8805e-17	139	261	3285	12231	FBgn0000244,FBgn0019650,FBgn0000157,FBgn0266465,FBgn0001624,FBgn0263980,FBgn0004635,FBgn0260798,FBgn0261563,FBgn0264908,FBgn0260397,FBgn0003382,FBgn0032252,FBgn0004839,FBgn0038341,FBgn0034408,FBgn0011481,FBgn0260934,FBgn0010113,FBgn0013469,FBgn0023094,FBgn0031955,FBgn0036257,FBgn0266411,FBgn0040752,FBgn0023172,FBgn0260799,FBgn0001139,FBgn0000179,FBgn0263705,FBgn0261574,FBgn0038197,FBgn0000114,FBg…
GO:0048729	tissue morphogenesis	biological_process	9.5425e-20	4.0097e-17	56	261	655	12231	FBgn0263289,FBgn0261574,FBgn0003041,FBgn0015919,FBgn0263705,FBgn0000636,FBgn0000179,FBgn0033438,FBgn0263706,FBgn0267336,FBgn0051145,FBgn0023172,FBgn0004102,FBgn0028979,FBgn0001078,FBgn0000633,FBgn0036257,FBgn0004198,FBgn0015609,FBgn0003651,FBgn0034876,FBgn0263077,FBgn0003944,FBgn0027932,FBgn0086758,FBgn0010113,FBgn0264272,FBgn0020251,FBgn0010909,FBgn0034408,FBgn0000229,FBgn0260934,FBgn0262139,FBg…
GO:0005488	binding	molecular_function	9.8528e-20	4.0097e-17	195	261	5816	12231	FBgn0085399,FBgn0038197,FBgn0000114,FBgn0024189,FBgn0086898,FBgn0264695,FBgn0039617,FBgn0263392,FBgn0029761,FBgn0001319,FBgn0037487,FBgn0000108,FBgn0265140,FBgn0005630,FBgn0001320,FBgn0022800,FBgn0262139,FBgn0027596,FBgn0086758,FBgn0027932,FBgn0013995,FBgn0026238,FBgn0260439,FBgn0028369,FBgn0003944,FBgn0045852,FBgn0001078,FBgn0004102,FBgn0035798,FBgn0035170,FBgn0038156,FBgn0036428,FBgn0025936,FBg…
GO:0048666	neuron development	biological_process	1.1557e-19	4.515e-17	57	261	681	12231	FBgn0259984,FBgn0001078,FBgn0004102,FBgn0265296,FBgn0035798,FBgn0023172,FBgn0034070,FBgn0001139,FBgn0262975,FBgn0041092,FBgn0013433,FBgn0004795,FBgn0025936,FBgn0000636,FBgn0035101,FBgn0003041,FBgn0010909,FBgn0259481,FBgn0010113,FBgn0027596,FBgn0086758,FBgn0045852,FBgn0051352,FBgn0004198,FBgn0028645,FBgn0015609,FBgn0031955,FBgn0004606,FBgn0039081,FBgn0001319,FBgn0000464,FBgn0033791,FBgn0033159,FBg…
GO:0031175	neuron projection development	biological_process	4.2512e-19	1.597e-16	51	261	562	12231	FBgn0039081,FBgn0001319,FBgn0000108,FBgn0033791,FBgn0033159,FBgn0000464,FBgn0005630,FBgn0040271,FBgn0028704,FBgn0001320,FBgn0026189,FBgn0262139,FBgn0004839,FBgn0000229,FBgn0011481,FBgn0261963,FBgn0083981,FBgn0000210,FBgn0263930,FBgn0011259,FBgn0038197,FBgn0004666,FBgn0029157,FBgn0000253,FBgn0004635,FBgn0259984,FBgn0001078,FBgn0023172,FBgn0265296,FBgn0035798,FBgn0004102,FBgn0001139,FBgn0262975,FBg…
GO:0048812	neuron projection morphogenesis	biological_process	1.0794e-18	3.9045e-16	50	261	552	12231	FBgn0004666,FBgn0029157,FBgn0000253,FBgn0004635,FBgn0263930,FBgn0011259,FBgn0038197,FBgn0026189,FBgn0262139,FBgn0004839,FBgn0000229,FBgn0011481,FBgn0261963,FBgn0083981,FBgn0000210,FBgn0039081,FBgn0001319,FBgn0000108,FBgn0033159,FBgn0033791,FBgn0000464,FBgn0005630,FBgn0040271,FBgn0001320,FBgn0028704,FBgn0045852,FBgn0051352,FBgn0015609,FBgn0004198,FBgn0028645,FBgn0031955,FBgn0004606,FBgn0010113,FBg…
GO:0035239	tube morphogenesis	biological_process	1.1648e-18	4.063e-16	50	261	553	12231	FBgn0000244,FBgn0263930,FBgn0265487,FBgn0011817,FBgn0000114,FBgn0038197,FBgn0086898,FBgn0260798,FBgn0266465,FBgn0001624,FBgn0004635,FBgn0260003,FBgn0000157,FBgn0260397,FBgn0003118,FBgn0261563,FBgn0266084,FBgn0001319,FBgn0003731,FBgn0005630,FBgn0003382,FBgn0260934,FBgn0000229,FBgn0004839,FBgn0262139,FBgn0086758,FBgn0264272,FBgn0020251,FBgn0010909,FBgn0010113,FBgn0263077,FBgn0003944,FBgn0034876,FBg…
GO:0032989	cellular component morphogenesis	biological_process	1.4457e-18	4.8691e-16	63	261	869	12231	FBgn0000636,FBgn0041092,FBgn0013433,FBgn0004795,FBgn0025936,FBgn0263289,FBgn0003041,FBgn0004102,FBgn0265296,FBgn0035798,FBgn0023172,FBgn0001078,FBgn0259984,FBgn0262975,FBgn0001139,FBgn0004198,FBgn0028645,FBgn0015609,FBgn0045852,FBgn0051352,FBgn0004606,FBgn0031955,FBgn0027596,FBgn0086758,FBgn0029881,FBgn0026238,FBgn0010909,FBgn0264272,FBgn0036985,FBgn0259481,FBgn0010113,FBgn0025391,FBgn0265991,FBg…
GO:0030154	cell differentiation	biological_process	1.7379e-18	5.5609e-16	106	261	2183	12231	FBgn0023172,FBgn0034070,FBgn0001139,FBgn0004795,FBgn0013433,FBgn0033438,FBgn0035101,FBgn0003041,FBgn0015919,FBgn0267791,FBgn0261574,FBgn0010113,FBgn0259481,FBgn0013469,FBgn0000413,FBgn0025391,FBgn0262738,FBgn0015609,FBgn0004198,FBgn0028645,FBgn0031955,FBgn0004606,FBgn0266411,FBgn0000633,FBgn0266084,FBgn0264908,FBgn0260397,FBgn0033791,FBgn0003382,FBgn0003507,FBgn0003731,FBgn0004839,FBgn0000229,FBg…
GO:0048569	post-embryonic organ development	biological_process	1.765e-18	5.5609e-16	47	261	493	12231	FBgn0015919,FBgn0263289,FBgn0000179,FBgn0033438,FBgn0000636,FBgn0263706,FBgn0267336,FBgn0001078,FBgn0023172,FBgn0051145,FBgn0004102,FBgn0036257,FBgn0004198,FBgn0028369,FBgn0263077,FBgn0034876,FBgn0003944,FBgn0010113,FBgn0264272,FBgn0020251,FBgn0010909,FBgn0086758,FBgn0032252,FBgn0000229,FBgn0260934,FBgn0003382,FBgn0003507,FBgn0005630,FBgn0003731,FBgn0001319,FBgn0261563,FBgn0266084,FBgn0260397,FBg…
GO:0060562	epithelial tube morphogenesis	biological_process	3.4422e-18	1.0506e-15	48	261	523	12231	FBgn0003731,FBgn0005630,FBgn0003382,FBgn0260397,FBgn0003118,FBgn0266084,FBgn0261563,FBgn0001319,FBgn0260934,FBgn0000229,FBgn0262139,FBgn0011817,FBgn0000114,FBgn0038197,FBgn0000244,FBgn0265487,FBgn0263930,FBgn0260798,FBgn0266465,FBgn0004635,FBgn0001624,FBgn0260003,FBgn0000157,FBgn0086898,FBgn0267336,FBgn0263706,FBgn0004102,FBgn0023172,FBgn0051145,FBgn0001078,FBgn0263289,FBgn0015919,FBgn0003041,FBg…
GO:0000902	cell morphogenesis	biological_process	3.9228e-18	1.161e-15	58	261	759	12231	FBgn0262975,FBgn0001139,FBgn0035798,FBgn0265296,FBgn0023172,FBgn0004102,FBgn0259984,FBgn0001078,FBgn0263289,FBgn0003041,FBgn0000636,FBgn0004795,FBgn0013433,FBgn0025936,FBgn0041092,FBgn0086758,FBgn0027596,FBgn0029881,FBgn0010113,FBgn0259481,FBgn0036985,FBgn0264272,FBgn0010909,FBgn0004606,FBgn0031955,FBgn0004198,FBgn0028645,FBgn0015609,FBgn0045852,FBgn0051352,FBgn0040271,FBgn0028704,FBgn0001320,FBg…
GO:0050793	regulation of developmental process	biological_process	4.9452e-18	1.4054e-15	51	261	595	12231	FBgn0029157,FBgn0020269,FBgn0001624,FBgn0004797,FBgn0038197,FBgn0011817,FBgn0000114,FBgn0011259,FBgn0263930,FBgn0261963,FBgn0261811,FBgn0000210,FBgn0260934,FBgn0037130,FBgn0003507,FBgn0250823,FBgn0263995,FBgn0003731,FBgn0266084,FBgn0261563,FBgn0001319,FBgn0000567,FBgn0086613,FBgn0000464,FBgn0033159,FBgn0003118,FBgn0036257,FBgn0004878,FBgn0045852,FBgn0262738,FBgn0015609,FBgn0028369,FBgn0003944,FBg…
GO:0000904	cell morphogenesis involved in differentiation	biological_process	5.0361e-18	1.4054e-15	47	261	506	12231	FBgn0038197,FBgn0263930,FBgn0011259,FBgn0004635,FBgn0000253,FBgn0029157,FBgn0004666,FBgn0040271,FBgn0001320,FBgn0250823,FBgn0005630,FBgn0000464,FBgn0033791,FBgn0033159,FBgn0001319,FBgn0266084,FBgn0083981,FBgn0000210,FBgn0261963,FBgn0000229,FBgn0262139,FBgn0004839,FBgn0086758,FBgn0029881,FBgn0036985,FBgn0010113,FBgn0010909,FBgn0264272,FBgn0004606,FBgn0028645,FBgn0015609,FBgn0004198,FBgn0045852,FBg…
GO:0044763	single-organism cellular process	biological_process	5.5366e-18	1.5021e-15	178	261	5158	12231	FBgn0020269,FBgn0259171,FBgn0260003,FBgn0004797,FBgn0004387,FBgn0053531,FBgn0011666,FBgn0083963,FBgn0083981,FBgn0033313,FBgn0032330,FBgn0261811,FBgn0026189,FBgn0250823,FBgn0259145,FBgn0263995,FBgn0028704,FBgn0000567,FBgn0038975,FBgn0033159,FBgn0000464,FBgn0003118,FBgn0264490,FBgn0051352,FBgn0039776,FBgn0262562,FBgn0050361,FBgn0030366,FBgn0004878,FBgn0265991,FBgn0003651,FBgn0010909,FBgn0264272,FBg…
GO:0007444	imaginal disc development	biological_process	7.0664e-18	1.8653e-15	53	261	647	12231	FBgn0000229,FBgn0011481,FBgn0260934,FBgn0261811,FBgn0261963,FBgn0003118,FBgn0260397,FBgn0039081,FBgn0001319,FBgn0261563,FBgn0266084,FBgn0003731,FBgn0003382,FBgn0005630,FBgn0004797,FBgn0086898,FBgn0004666,FBgn0011826,FBgn0004635,FBgn0001624,FBgn0260798,FBgn0000157,FBgn0260003,FBgn0000244,FBgn0263930,FBgn0265487,FBgn0000114,FBgn0011817,FBgn0038197,FBgn0019650,FBgn0000636,FBgn0033438,FBgn0000179,FBg…
GO:0044699	single-organism process	biological_process	9.7888e-18	2.516e-15	206	261	6591	12231	FBgn0051145,FBgn0034070,FBgn0034286,FBgn0083975,FBgn0003041,FBgn0015919,FBgn0265597,FBgn0004842,FBgn0051719,FBgn0267791,FBgn0033438,FBgn0011754,FBgn0013433,FBgn0013334,FBgn0004795,FBgn0035101,FBgn0039916,FBgn0263077,FBgn0025391,FBgn0263111,FBgn0259481,FBgn0003145,FBgn0260658,FBgn0000413,FBgn0004606,FBgn0000633,FBgn0262738,FBgn0030662,FBgn0000024,FBgn0004198,FBgn0033504,FBgn0028645,FBgn0015609,FBg…
GO:0009886	post-embryonic morphogenesis	biological_process	2.9288e-17	7.3065e-15	45	261	485	12231	FBgn0004198,FBgn0036257,FBgn0264272,FBgn0010909,FBgn0020251,FBgn0010113,FBgn0086758,FBgn0034876,FBgn0263077,FBgn0003944,FBgn0033438,FBgn0000179,FBgn0000636,FBgn0015919,FBgn0263289,FBgn0001078,FBgn0004102,FBgn0051145,FBgn0023172,FBgn0267336,FBgn0263706,FBgn0086898,FBgn0260003,FBgn0000157,FBgn0260798,FBgn0001624,FBgn0004635,FBgn0263930,FBgn0265487,FBgn0000244,FBgn0038197,FBgn0011817,FBgn0000114,FBg…
GO:0007399	nervous system development	biological_process	2.9923e-17	7.3065e-15	85	261	1567	12231	FBgn0035101,FBgn0013433,FBgn0004795,FBgn0003041,FBgn0083975,FBgn0034070,FBgn0023172,FBgn0040752,FBgn0001139,FBgn0015609,FBgn0004198,FBgn0028645,FBgn0004606,FBgn0036257,FBgn0031955,FBgn0000413,FBgn0013469,FBgn0259481,FBgn0263111,FBgn0010113,FBgn0260934,FBgn0011481,FBgn0037130,FBgn0000229,FBgn0004839,FBgn0000210,FBgn0261963,FBgn0033791,FBgn0264908,FBgn0003731,FBgn0003382,FBgn0004666,FBgn0001624,FBg…
GO:0048869	cellular developmental process	biological_process	4.0283e-17	9.5961e-15	106	261	2278	12231	FBgn0004878,FBgn0051352,FBgn0045852,FBgn0264490,FBgn0029881,FBgn0086758,FBgn0021764,FBgn0027932,FBgn0027596,FBgn0026238,FBgn0264272,FBgn0010909,FBgn0036985,FBgn0003944,FBgn0003651,FBgn0265991,FBgn0260439,FBgn0028369,FBgn0000636,FBgn0041092,FBgn0025936,FBgn0263289,FBgn0028979,FBgn0004102,FBgn0035798,FBgn0265296,FBgn0001078,FBgn0259984,FBgn0040318,FBgn0262975,FBgn0004797,FBgn0086898,FBgn0264695,FBg…
GO:0048858	cell projection morphogenesis	biological_process	6.4791e-17	1.5067e-14	50	261	609	12231	FBgn0033159,FBgn0033791,FBgn0000464,FBgn0000108,FBgn0039081,FBgn0001319,FBgn0001320,FBgn0040271,FBgn0028704,FBgn0005630,FBgn0011481,FBgn0000229,FBgn0004839,FBgn0262139,FBgn0026189,FBgn0083981,FBgn0000210,FBgn0261963,FBgn0011259,FBgn0263930,FBgn0038197,FBgn0004666,FBgn0004635,FBgn0000253,FBgn0029157,FBgn0004102,FBgn0035798,FBgn0265296,FBgn0023172,FBgn0259984,FBgn0001078,FBgn0262975,FBgn0001139,FBg…
GO:0048707	instar larval or pupal morphogenesis	biological_process	6.7726e-17	1.5383e-14	44	261	474	12231	FBgn0004102,FBgn0023172,FBgn0051145,FBgn0001078,FBgn0267336,FBgn0263706,FBgn0000636,FBgn0033438,FBgn0000179,FBgn0263289,FBgn0015919,FBgn0086758,FBgn0020251,FBgn0264272,FBgn0010909,FBgn0010113,FBgn0263077,FBgn0034876,FBgn0003944,FBgn0004198,FBgn0036257,FBgn0260397,FBgn0003118,FBgn0261563,FBgn0266084,FBgn0001319,FBgn0003731,FBgn0005630,FBgn0003382,FBgn0260934,FBgn0000229,FBgn0000210,FBgn0000244,FBg…
GO:0009791	post-embryonic development	biological_process	7.9249e-17	1.7592e-14	50	261	612	12231	FBgn0015919,FBgn0263289,FBgn0033438,FBgn0000179,FBgn0000636,FBgn0263706,FBgn0267336,FBgn0001078,FBgn0023172,FBgn0051145,FBgn0004102,FBgn0036257,FBgn0004878,FBgn0004198,FBgn0028369,FBgn0003944,FBgn0263077,FBgn0034876,FBgn0010113,FBgn0010909,FBgn0264272,FBgn0020251,FBgn0086758,FBgn0000210,FBgn0032252,FBgn0000229,FBgn0038341,FBgn0260934,FBgn0003382,FBgn0005630,FBgn0003507,FBgn0003731,FBgn0001319,FBg…
GO:0032990	cell part morphogenesis	biological_process	9.0551e-17	1.9654e-14	50	261	614	12231	FBgn0035798,FBgn0265296,FBgn0023172,FBgn0004102,FBgn0259984,FBgn0001078,FBgn0262975,FBgn0001139,FBgn0000636,FBgn0013433,FBgn0004795,FBgn0025936,FBgn0041092,FBgn0003041,FBgn0027596,FBgn0086758,FBgn0010113,FBgn0010909,FBgn0004198,FBgn0028645,FBgn0015609,FBgn0051352,FBgn0045852,FBgn0004606,FBgn0031955,FBgn0000108,FBgn0033791,FBgn0000464,FBgn0033159,FBgn0001319,FBgn0039081,FBgn0001320,FBgn0040271,FBg…
GO:0007560	imaginal disc morphogenesis	biological_process	1.2321e-16	2.5603e-14	43	261	460	12231	FBgn0266084,FBgn0261563,FBgn0001319,FBgn0260397,FBgn0003118,FBgn0005630,FBgn0003382,FBgn0003731,FBgn0260934,FBgn0000229,FBgn0263930,FBgn0265487,FBgn0000244,FBgn0038197,FBgn0011817,FBgn0000114,FBgn0086898,FBgn0260003,FBgn0000157,FBgn0260798,FBgn0001624,FBgn0004635,FBgn0001078,FBgn0004102,FBgn0051145,FBgn0023172,FBgn0267336,FBgn0263706,FBgn0000179,FBgn0033438,FBgn0000636,FBgn0015919,FBgn0263289,FBg…
GO:0048563	post-embryonic organ morphogenesis	biological_process	1.2321e-16	2.5603e-14	43	261	460	12231	FBgn0000229,FBgn0260934,FBgn0003382,FBgn0005630,FBgn0003731,FBgn0001319,FBgn0266084,FBgn0261563,FBgn0003118,FBgn0260397,FBgn0000157,FBgn0260003,FBgn0001624,FBgn0004635,FBgn0260798,FBgn0086898,FBgn0038197,FBgn0000114,FBgn0011817,FBgn0263930,FBgn0265487,FBgn0000244,FBgn0015919,FBgn0263289,FBgn0033438,FBgn0000179,FBgn0000636,FBgn0263706,FBgn0267336,FBgn0001078,FBgn0023172,FBgn0051145,FBgn0004102,FBg…
GO:0016043	cellular component organization	biological_process	1.3049e-16	2.6552e-14	110	261	2459	12231	FBgn0004198,FBgn0015609,FBgn0028645,FBgn0004606,FBgn0011288,FBgn0266411,FBgn0031955,FBgn0005564,FBgn0036257,FBgn0259481,FBgn0263111,FBgn0010113,FBgn0025391,FBgn0263705,FBgn0035101,FBgn0013433,FBgn0004795,FBgn0033438,FBgn0261574,FBgn0003041,FBgn0034070,FBgn0039260,FBgn0023172,FBgn0083975,FBgn0040752,FBgn0260799,FBgn0001139,FBgn0004666,FBgn0260749,FBgn0011826,FBgn0266465,FBgn0263980,FBgn0004635,FBg…
GO:0035107	appendage morphogenesis	biological_process	2.8944e-16	5.7693e-14	40	261	407	12231	FBgn0086758,FBgn0264272,FBgn0010909,FBgn0020251,FBgn0010113,FBgn0003944,FBgn0263077,FBgn0034876,FBgn0004198,FBgn0036257,FBgn0051145,FBgn0023172,FBgn0001078,FBgn0267336,FBgn0263706,FBgn0000636,FBgn0000179,FBgn0267791,FBgn0263289,FBgn0015919,FBgn0000244,FBgn0263930,FBgn0265487,FBgn0011817,FBgn0000114,FBgn0038197,FBgn0086898,FBgn0260798,FBgn0004635,FBgn0260003,FBgn0000157,FBgn0260397,FBgn0003118,FBg…
GO:0048736	appendage development	biological_process	4.0498e-16	7.911e-14	40	261	411	12231	FBgn0086898,FBgn0000157,FBgn0260003,FBgn0004635,FBgn0260798,FBgn0263930,FBgn0265487,FBgn0000244,FBgn0038197,FBgn0000114,FBgn0011817,FBgn0260934,FBgn0001319,FBgn0266084,FBgn0261563,FBgn0003118,FBgn0260397,FBgn0003382,FBgn0005630,FBgn0003731,FBgn0004198,FBgn0036257,FBgn0010113,FBgn0020251,FBgn0264272,FBgn0010909,FBgn0086758,FBgn0003944,FBgn0034876,FBgn0263077,FBgn0000179,FBgn0000636,FBgn0015919,FBg…
GO:0007552	metamorphosis	biological_process	4.8883e-16	9.3616e-14	44	261	500	12231	FBgn0004635,FBgn0001624,FBgn0260798,FBgn0000157,FBgn0260003,FBgn0086898,FBgn0000114,FBgn0011817,FBgn0038197,FBgn0000244,FBgn0263930,FBgn0265487,FBgn0000210,FBgn0000229,FBgn0260934,FBgn0003731,FBgn0003382,FBgn0005630,FBgn0003118,FBgn0260397,FBgn0001319,FBgn0261563,FBgn0266084,FBgn0036257,FBgn0004198,FBgn0263077,FBgn0003944,FBgn0034876,FBgn0086758,FBgn0010113,FBgn0264272,FBgn0010909,FBgn0020251,FBg…
GO:0040011	locomotion	biological_process	6.5967e-16	1.239e-13	47	261	573	12231	FBgn0005630,FBgn0003507,FBgn0250823,FBgn0040271,FBgn0001320,FBgn0003731,FBgn0261563,FBgn0266084,FBgn0033159,FBgn0033791,FBgn0003118,FBgn0000464,FBgn0038975,FBgn0261963,FBgn0000210,FBgn0004839,FBgn0260934,FBgn0038341,FBgn0000229,FBgn0011817,FBgn0265998,FBgn0011259,FBgn0263930,FBgn0000253,FBgn0001624,FBgn0004666,FBgn0264695,FBgn0052423,FBgn0259984,FBgn0003041,FBgn0263289,FBgn0041092,FBgn0004795,FBg…
GO:0071840	cellular component organization or biogenesis	biological_process	7.0615e-16	1.3013e-13	110	261	2516	12231	FBgn0020251,FBgn0264272,FBgn0010909,FBgn0036985,FBgn0086758,FBgn0029881,FBgn0027596,FBgn0026238,FBgn0260439,FBgn0028369,FBgn0265991,FBgn0030366,FBgn0045852,FBgn0051352,FBgn0264490,FBgn0001078,FBgn0259984,FBgn0004102,FBgn0035798,FBgn0265296,FBgn0262975,FBgn0041092,FBgn0025936,FBgn0000636,FBgn0263289,FBgn0038197,FBgn0000114,FBgn0024189,FBgn0086898,FBgn0264695,FBgn0020269,FBgn0039081,FBgn0001319,FBg…
GO:0035120	post-embryonic appendage morphogenesis	biological_process	7.202e-16	1.3026e-13	39	261	397	12231	FBgn0260934,FBgn0003731,FBgn0003382,FBgn0005630,FBgn0003118,FBgn0260397,FBgn0001319,FBgn0261563,FBgn0266084,FBgn0004635,FBgn0260798,FBgn0000157,FBgn0260003,FBgn0086898,FBgn0000114,FBgn0011817,FBgn0038197,FBgn0000244,FBgn0265487,FBgn0263930,FBgn0263289,FBgn0015919,FBgn0000636,FBgn0000179,FBgn0263706,FBgn0267336,FBgn0023172,FBgn0051145,FBgn0001078,FBgn0036257,FBgn0004198,FBgn0003944,FBgn0034876,FBg…
GO:0048667	cell morphogenesis involved in neuron differentiation	biological_process	8.4499e-16	1.5006e-13	42	261	463	12231	FBgn0086758,FBgn0010113,FBgn0010909,FBgn0004606,FBgn0028645,FBgn0004198,FBgn0015609,FBgn0051352,FBgn0045852,FBgn0262975,FBgn0001139,FBgn0023172,FBgn0035798,FBgn0004102,FBgn0259984,FBgn0001078,FBgn0003041,FBgn0000636,FBgn0004795,FBgn0013433,FBgn0025936,FBgn0041092,FBgn0038197,FBgn0263930,FBgn0011259,FBgn0004635,FBgn0029157,FBgn0000253,FBgn0004666,FBgn0001320,FBgn0040271,FBgn0005630,FBgn0000464,FBg…
GO:0035114	imaginal disc-derived appendage morphogenesis	biological_process	1.2914e-15	2.2524e-13	39	261	404	12231	FBgn0003944,FBgn0034876,FBgn0263077,FBgn0086758,FBgn0010113,FBgn0264272,FBgn0020251,FBgn0010909,FBgn0036257,FBgn0004198,FBgn0263706,FBgn0267336,FBgn0051145,FBgn0023172,FBgn0001078,FBgn0263289,FBgn0015919,FBgn0000636,FBgn0000179,FBgn0000114,FBgn0011817,FBgn0038197,FBgn0000244,FBgn0263930,FBgn0265487,FBgn0004635,FBgn0260798,FBgn0000157,FBgn0260003,FBgn0086898,FBgn0003731,FBgn0003382,FBgn0005630,FBg…
GO:0048737	imaginal disc-derived appendage development	biological_process	1.7925e-15	3.0714e-13	39	261	408	12231	FBgn0003731,FBgn0005630,FBgn0003382,FBgn0003118,FBgn0260397,FBgn0261563,FBgn0266084,FBgn0001319,FBgn0260934,FBgn0011817,FBgn0000114,FBgn0038197,FBgn0000244,FBgn0263930,FBgn0265487,FBgn0260798,FBgn0004635,FBgn0260003,FBgn0000157,FBgn0086898,FBgn0267336,FBgn0263706,FBgn0051145,FBgn0023172,FBgn0001078,FBgn0263289,FBgn0015919,FBgn0000636,FBgn0000179,FBgn0263077,FBgn0003944,FBgn0034876,FBgn0086758,FBg…
GO:0022008	neurogenesis	biological_process	2.89e-15	4.8462e-13	75	261	1372	12231	FBgn0031955,FBgn0004606,FBgn0028645,FBgn0015609,FBgn0004198,FBgn0010113,FBgn0259481,FBgn0013469,FBgn0000413,FBgn0003041,FBgn0004795,FBgn0013433,FBgn0035101,FBgn0001139,FBgn0034070,FBgn0023172,FBgn0029157,FBgn0000253,FBgn0004635,FBgn0001624,FBgn0004666,FBgn0265998,FBgn0263930,FBgn0265487,FBgn0011259,FBgn0004509,FBgn0261963,FBgn0000210,FBgn0004839,FBgn0000229,FBgn0011481,FBgn0260934,FBgn0003382,FBg…
GO:2000026	regulation of multicellular organismal development	biological_process	2.9274e-15	4.8462e-13	39	261	414	12231	FBgn0033159,FBgn0000464,FBgn0003118,FBgn0261563,FBgn0001319,FBgn0003731,FBgn0250823,FBgn0037130,FBgn0260934,FBgn0261963,FBgn0011259,FBgn0263930,FBgn0011817,FBgn0038197,FBgn0001624,FBgn0029157,FBgn0004102,FBgn0023172,FBgn0259984,FBgn0262975,FBgn0261574,FBgn0263289,FBgn0003041,FBgn0027932,FBgn0021764,FBgn0264272,FBgn0010909,FBgn0013469,FBgn0020251,FBgn0010113,FBgn0263111,FBgn0036985,FBgn0259481,FBg…
GO:0051239	regulation of multicellular organismal process	biological_process	4.331e-15	7.0501e-13	46	261	578	12231	FBgn0263930,FBgn0011259,FBgn0011817,FBgn0265998,FBgn0038197,FBgn0017561,FBgn0004797,FBgn0001624,FBgn0029157,FBgn0000464,FBgn0033159,FBgn0003118,FBgn0001319,FBgn0261563,FBgn0263995,FBgn0003731,FBgn0250823,FBgn0003507,FBgn0037130,FBgn0260934,FBgn0261963,FBgn0027932,FBgn0021764,FBgn0263111,FBgn0036985,FBgn0259481,FBgn0010113,FBgn0264272,FBgn0010909,FBgn0013469,FBgn0020251,FBgn0003944,FBgn0028369,FBg…
GO:0001071	nucleic acid binding transcription factor activity	molecular_function	4.7472e-15	7.4784e-13	40	261	442	12231	FBgn0263772,FBgn0045852,FBgn0004878,FBgn0023094,FBgn0004198,FBgn0264490,FBgn0004606,FBgn0003145,FBgn0262477,FBgn0000413,FBgn0086758,FBgn0003651,FBgn0003944,FBgn0004795,FBgn0000179,FBgn0035849,FBgn0015919,FBgn0001078,FBgn0040318,FBgn0008646,FBgn0028979,FBgn0004102,FBgn0042696,FBgn0262975,FBgn0004914,FBgn0004666,FBgn0000157,FBgn0019650,FBgn0038197,FBgn0262139,FBgn0261963,FBgn0083981,FBgn0000210,FBg…
GO:0003700	transcription factor activity, sequence-specific DNA binding	molecular_function	4.7472e-15	7.4784e-13	40	261	442	12231	FBgn0004795,FBgn0000179,FBgn0035849,FBgn0015919,FBgn0040318,FBgn0001078,FBgn0008646,FBgn0028979,FBgn0004102,FBgn0042696,FBgn0262975,FBgn0263772,FBgn0045852,FBgn0004878,FBgn0023094,FBgn0004198,FBgn0004606,FBgn0264490,FBgn0003145,FBgn0000413,FBgn0262477,FBgn0086758,FBgn0003651,FBgn0003944,FBgn0262139,FBgn0261963,FBgn0000210,FBgn0083981,FBgn0001319,FBgn0000567,FBgn0003118,FBgn0005630,FBgn0003507,FBg…
GO:0007476	imaginal disc-derived wing morphogenesis	biological_process	1.2325e-14	1.9107e-12	35	261	348	12231	FBgn0263289,FBgn0015919,FBgn0000636,FBgn0000179,FBgn0267336,FBgn0023172,FBgn0051145,FBgn0004198,FBgn0034876,FBgn0263077,FBgn0086758,FBgn0010113,FBgn0020251,FBgn0264272,FBgn0010909,FBgn0260934,FBgn0003731,FBgn0003382,FBgn0005630,FBgn0003118,FBgn0260397,FBgn0001319,FBgn0261563,FBgn0266084,FBgn0004635,FBgn0260798,FBgn0000157,FBgn0260003,FBgn0086898,FBgn0000114,FBgn0011817,FBgn0038197,FBgn0000244,FBg…
GO:0007154	cell communication	biological_process	1.341e-14	2.0465e-12	84	261	1703	12231	FBgn0036257,FBgn0005564,FBgn0011288,FBgn0266411,FBgn0000024,FBgn0262738,FBgn0004198,FBgn0015609,FBgn0023094,FBgn0039916,FBgn0013469,FBgn0263111,FBgn0260658,FBgn0003041,FBgn0265597,FBgn0004842,FBgn0033438,FBgn0013334,FBgn0264815,FBgn0001139,FBgn0264357,FBgn0083975,FBgn0039260,FBgn0023172,FBgn0032151,FBgn0000253,FBgn0052082,FBgn0260798,FBgn0004635,FBgn0263980,FBgn0001624,FBgn0004914,FBgn0260749,FBg…
GO:0002165	instar larval or pupal development	biological_process	1.5375e-14	2.3103e-12	45	261	574	12231	FBgn0000210,FBgn0260934,FBgn0000229,FBgn0038341,FBgn0003731,FBgn0005630,FBgn0003382,FBgn0260397,FBgn0003118,FBgn0261563,FBgn0266084,FBgn0001319,FBgn0260798,FBgn0001624,FBgn0004635,FBgn0260003,FBgn0000157,FBgn0086898,FBgn0011817,FBgn0000114,FBgn0038197,FBgn0000244,FBgn0263930,FBgn0265487,FBgn0263289,FBgn0015919,FBgn0000636,FBgn0033438,FBgn0000179,FBgn0267336,FBgn0263706,FBgn0004102,FBgn0023172,FBg…
GO:0045595	regulation of cell differentiation	biological_process	1.5829e-14	2.3425e-12	30	261	254	12231	FBgn0021764,FBgn0010113,FBgn0264272,FBgn0011259,FBgn0013469,FBgn0000114,FBgn0003944,FBgn0028369,FBgn0015609,FBgn0004797,FBgn0262738,FBgn0045852,FBgn0001624,FBgn0029157,FBgn0020269,FBgn0023172,FBgn0004102,FBgn0033159,FBgn0003118,FBgn0000464,FBgn0001319,FBgn0266084,FBgn0259984,FBgn0262975,FBgn0003731,FBgn0250823,FBgn0003507,FBgn0260934,FBgn0003041,FBgn0261963
GO:0071944	cell periphery	cellular_component	1.6906e-14	2.4645e-12	61	261	998	12231	FBgn0259246,FBgn0003731,FBgn0259111,FBgn0003382,FBgn0250823,FBgn0000464,FBgn0033159,FBgn0264908,FBgn0000108,FBgn0038975,FBgn0263219,FBgn0083963,FBgn0266429,FBgn0260934,FBgn0037130,FBgn0034408,FBgn0004839,FBgn0022800,FBgn0026189,FBgn0083956,FBgn0004509,FBgn0011259,FBgn0263930,FBgn0004635,FBgn0001624,FBgn0260003,FBgn0032151,FBgn0017561,FBgn0024189,FBgn0261046,FBgn0083975,FBgn0023172,FBgn0265296,FBg…
GO:0007472	wing disc morphogenesis	biological_process	2.0615e-14	2.9609e-12	35	261	354	12231	FBgn0260798,FBgn0004635,FBgn0260003,FBgn0000157,FBgn0086898,FBgn0011817,FBgn0000114,FBgn0038197,FBgn0000244,FBgn0265487,FBgn0263930,FBgn0260934,FBgn0003731,FBgn0005630,FBgn0003382,FBgn0003118,FBgn0260397,FBgn0266084,FBgn0261563,FBgn0001319,FBgn0004198,FBgn0263077,FBgn0034876,FBgn0086758,FBgn0010909,FBgn0020251,FBgn0264272,FBgn0010113,FBgn0263289,FBgn0015919,FBgn0000636,FBgn0000179,FBgn0267336,FBg…
GO:0048519	negative regulation of biological process	biological_process	3.7302e-14	5.2801e-12	63	261	1074	12231	FBgn0260749,FBgn0004797,FBgn0000157,FBgn0000253,FBgn0028397,FBgn0004635,FBgn0001624,FBgn0260798,FBgn0263930,FBgn0011666,FBgn0038197,FBgn0000114,FBgn0011817,FBgn0265998,FBgn0004839,FBgn0000229,FBgn0260934,FBgn0014870,FBgn0261963,FBgn0000210,FBgn0032330,FBgn0039081,FBgn0263197,FBgn0000108,FBgn0260397,FBgn0003118,FBgn0086613,FBgn0250823,FBgn0003507,FBgn0001320,FBgn0040271,FBgn0003731,FBgn0262738,FBg…
GO:0005886	plasma membrane	cellular_component	5.0016e-14	6.9787e-12	56	261	881	12231	FBgn0011288,FBgn0264953,FBgn0005564,FBgn0028645,FBgn0015609,FBgn0000024,FBgn0050361,FBgn0263116,FBgn0262738,FBgn0025391,FBgn0032456,FBgn0039916,FBgn0028369,FBgn0021764,FBgn0027932,FBgn0013995,FBgn0036985,FBgn0263111,FBgn0259481,FBgn0261574,FBgn0263289,FBgn0004842,FBgn0000636,FBgn0033438,FBgn0025936,FBgn0083975,FBgn0265296,FBgn0023172,FBgn0001624,FBgn0004635,FBgn0032151,FBgn0260003,FBgn0017561,FBg…
GO:0065008	regulation of biological quality	biological_process	1.4091e-13	1.9384e-11	58	261	960	12231	FBgn0015609,FBgn0262738,FBgn0000024,FBgn0011288,FBgn0036257,FBgn0036985,FBgn0263111,FBgn0259481,FBgn0264272,FBgn0010909,FBgn0039916,FBgn0025391,FBgn0035101,FBgn0004795,FBgn0013334,FBgn0041092,FBgn0263289,FBgn0003041,FBgn0034070,FBgn0039260,FBgn0023172,FBgn0001078,FBgn0259984,FBgn0262975,FBgn0264357,FBgn0017561,FBgn0264695,FBgn0004797,FBgn0263980,FBgn0001624,FBgn0004635,FBgn0029157,FBgn0000253,FBg…
GO:0035220	wing disc development	biological_process	1.5456e-13	2.0966e-11	39	261	468	12231	FBgn0011817,FBgn0000114,FBgn0038197,FBgn0000244,FBgn0265487,FBgn0263930,FBgn0260798,FBgn0004635,FBgn0260003,FBgn0000157,FBgn0086898,FBgn0004797,FBgn0011826,FBgn0003731,FBgn0005630,FBgn0003382,FBgn0260397,FBgn0003118,FBgn0266084,FBgn0261563,FBgn0001319,FBgn0039081,FBgn0260934,FBgn0011481,FBgn0034876,FBgn0263077,FBgn0086758,FBgn0010909,FBgn0264272,FBgn0020251,FBgn0010113,FBgn0004198,FBgn0267336,FBg…
GO:0051252	regulation of RNA metabolic process	biological_process	2.2646e-13	3.03e-11	56	261	914	12231	FBgn0004606,FBgn0264490,FBgn0266411,FBgn0023094,FBgn0004198,FBgn0013531,FBgn0045852,FBgn0263772,FBgn0004878,FBgn0030366,FBgn0003651,FBgn0003944,FBgn0000413,FBgn0262477,FBgn0003145,FBgn0267791,FBgn0015919,FBgn0035849,FBgn0004795,FBgn0000179,FBgn0041092,FBgn0262975,FBgn0042696,FBgn0001139,FBgn0008646,FBgn0004102,FBgn0028979,FBgn0040318,FBgn0001078,FBgn0000157,FBgn0004666,FBgn0260749,FBgn0004914,FBg…
GO:0001654	eye development	biological_process	2.5952e-13	3.4254e-11	34	261	364	12231	FBgn0038197,FBgn0019650,FBgn0011817,FBgn0265998,FBgn0263930,FBgn0265487,FBgn0000253,FBgn0029157,FBgn0024189,FBgn0086898,FBgn0250823,FBgn0005630,FBgn0003731,FBgn0028704,FBgn0000464,FBgn0003118,FBgn0000210,FBgn0034408,FBgn0028369,FBgn0003651,FBgn0259481,FBgn0013469,FBgn0021764,FBgn0000413,FBgn0262738,FBgn0015609,FBgn0260799,FBgn0034070,FBgn0004102,FBgn0028979,FBgn0015919,FBgn0263289,FBgn0000179,FBg…
GO:0048749	compound eye development	biological_process	3.9247e-13	5.111e-11	33	261	348	12231	FBgn0262738,FBgn0015609,FBgn0028369,FBgn0003651,FBgn0013469,FBgn0259481,FBgn0021764,FBgn0000413,FBgn0015919,FBgn0263289,FBgn0000179,FBgn0260799,FBgn0028979,FBgn0004102,FBgn0034070,FBgn0029157,FBgn0000253,FBgn0024189,FBgn0086898,FBgn0019650,FBgn0038197,FBgn0011817,FBgn0265998,FBgn0265487,FBgn0263930,FBgn0000210,FBgn0034408,FBgn0005630,FBgn0250823,FBgn0028704,FBgn0003731,FBgn0003118,FBgn0000464
GO:0048523	negative regulation of cellular process	biological_process	7.1399e-13	9.1758e-11	56	261	940	12231	FBgn0004878,FBgn0030366,FBgn0045852,FBgn0262738,FBgn0004198,FBgn0015609,FBgn0023094,FBgn0036257,FBgn0266411,FBgn0004606,FBgn0010909,FBgn0264272,FBgn0013469,FBgn0259481,FBgn0010113,FBgn0021764,FBgn0029881,FBgn0027932,FBgn0003944,FBgn0004795,FBgn0033438,FBgn0000179,FBgn0003041,FBgn0263289,FBgn0040318,FBgn0004102,FBgn0028979,FBgn0023172,FBgn0001139,FBgn0260749,FBgn0000253,FBgn0260798,FBgn0001624,FBg…
GO:0023052	signaling	biological_process	8.4486e-13	1.0539e-10	79	261	1664	12231	FBgn0264490,FBgn0263116,FBgn0262562,FBgn0050361,FBgn0003651,FBgn0013995,FBgn0026238,FBgn0029881,FBgn0027932,FBgn0264272,FBgn0020251,FBgn0010909,FBgn0264707,FBgn0035849,FBgn0025936,FBgn0041092,FBgn0263706,FBgn0001078,FBgn0259984,FBgn0259171,FBgn0260003,FBgn0038197,FBgn0053531,FBgn0033313,FBgn0261811,FBgn0266429,FBgn0262139,FBgn0259145,FBgn0040271,FBgn0263995,FBgn0259246,FBgn0250823,FBgn0038975,FBg…
GO:0044700	single organism signaling	biological_process	8.4486e-13	1.0539e-10	79	261	1664	12231	FBgn0011288,FBgn0266411,FBgn0005564,FBgn0036257,FBgn0004198,FBgn0023094,FBgn0000024,FBgn0262738,FBgn0039916,FBgn0260658,FBgn0013469,FBgn0263111,FBgn0004842,FBgn0265597,FBgn0003041,FBgn0264815,FBgn0013334,FBgn0033438,FBgn0001139,FBgn0083975,FBgn0023172,FBgn0039260,FBgn0052082,FBgn0260798,FBgn0263980,FBgn0004635,FBgn0001624,FBgn0032151,FBgn0000253,FBgn0004666,FBgn0085390,FBgn0004914,FBgn0260749,FBg…
GO:0050896	response to stimulus	biological_process	8.581e-13	1.0539e-10	105	261	2593	12231	FBgn0005630,FBgn0250823,FBgn0263995,FBgn0040271,FBgn0259145,FBgn0039081,FBgn0001319,FBgn0003118,FBgn0033159,FBgn0000464,FBgn0000108,FBgn0266429,FBgn0261811,FBgn0033313,FBgn0022800,FBgn0262139,FBgn0038197,FBgn0011666,FBgn0053531,FBgn0259171,FBgn0263706,FBgn0262975,FBgn0036428,FBgn0001078,FBgn0259984,FBgn0264707,FBgn0263289,FBgn0041092,FBgn0025936,FBgn0035849,FBgn0000636,FBgn0003651,FBgn0264272,FBg…
GO:0009987	cellular process	biological_process	8.6324e-13	1.0539e-10	196	261	6628	12231	FBgn0039013,FBgn0042696,FBgn0083975,FBgn0034070,FBgn0051719,FBgn0267791,FBgn0004842,FBgn0265597,FBgn0015919,FBgn0003041,FBgn0035101,FBgn0033438,FBgn0013334,FBgn0004795,FBgn0011754,FBgn0013433,FBgn0025391,FBgn0039916,FBgn0000413,FBgn0260658,FBgn0003145,FBgn0263111,FBgn0259481,FBgn0000633,FBgn0004606,FBgn0028645,FBgn0004198,FBgn0015609,FBgn0000024,FBgn0263772,FBgn0262738,FBgn0030662,FBgn0003731,FBg…
GO:0007423	sensory organ development	biological_process	1.0832e-12	1.3061e-10	38	261	474	12231	FBgn0019650,FBgn0038197,FBgn0265998,FBgn0011817,FBgn0265487,FBgn0263930,FBgn0011666,FBgn0000253,FBgn0029157,FBgn0260749,FBgn0024189,FBgn0086898,FBgn0250823,FBgn0005630,FBgn0028704,FBgn0003731,FBgn0000464,FBgn0003118,FBgn0000210,FBgn0034408,FBgn0028369,FBgn0003651,FBgn0259481,FBgn0013469,FBgn0021764,FBgn0000413,FBgn0045852,FBgn0262738,FBgn0015609,FBgn0004198,FBgn0260799,FBgn0034070,FBgn0028979,FBg…
GO:0019219	regulation of nucleobase-containing compound metabolic process	biological_process	1.2386e-12	1.4753e-10	56	261	953	12231	FBgn0001319,FBgn0000567,FBgn0086613,FBgn0260397,FBgn0003118,FBgn0005630,FBgn0003507,FBgn0001320,FBgn0016694,FBgn0262139,FBgn0011481,FBgn0086675,FBgn0014870,FBgn0261963,FBgn0032330,FBgn0083981,FBgn0000210,FBgn0263930,FBgn0265487,FBgn0038197,FBgn0019650,FBgn0265998,FBgn0000114,FBgn0004914,FBgn0260749,FBgn0004666,FBgn0000157,FBgn0040318,FBgn0001078,FBgn0004102,FBgn0028979,FBgn0008646,FBgn0001139,FBg…
GO:0043565	sequence-specific DNA binding	molecular_function	1.8999e-12	2.2357e-10	30	261	305	12231	FBgn0004914,FBgn0004198,FBgn0004666,FBgn0023094,FBgn0001994,FBgn0000157,FBgn0004606,FBgn0003145,FBgn0000413,FBgn0262477,FBgn0038197,FBgn0019650,FBgn0003944,FBgn0003651,FBgn0004795,FBgn0262139,FBgn0035849,FBgn0015919,FBgn0261963,FBgn0000210,FBgn0040318,FBgn0001078,FBgn0000567,FBgn0004102,FBgn0003118,FBgn0008646,FBgn0003507,FBgn0001320,FBgn0262975,FBgn0016694
GO:0001655	urogenital system development	biological_process	2.3944e-12	2.7514e-10	16	261	74	12231	FBgn0004606,FBgn0004635,FBgn0000633,FBgn0004198,FBgn0024189,FBgn0003651,FBgn0003944,FBgn0028369,FBgn0000413,FBgn0263289,FBgn0003041,FBgn0262139,FBgn0003731,FBgn0003118,FBgn0028979,FBgn0259984
GO:0072001	renal system development	biological_process	2.3944e-12	2.7514e-10	16	261	74	12231	FBgn0003041,FBgn0263289,FBgn0262139,FBgn0003731,FBgn0259984,FBgn0003118,FBgn0028979,FBgn0000633,FBgn0004606,FBgn0004635,FBgn0024189,FBgn0004198,FBgn0028369,FBgn0003944,FBgn0003651,FBgn0000413
[truncated: 2,950 more rows]

## Sheet: GO terms_Rel_Cag
Enriched GO terms for DE miRNAs in oviposition recovery process
GO_accession	Description	Term_type	Over_represented_pValue	Corrected_pValue	DEG_item	DEG_list	Bg_item	Bg_list	Gene_names
[truncated: 2,344 more rows]

## Sheet: KEGG pathways_Que_Vir
Enriched KEGG pathways for DE miRNAs in ovary activation process
[truncated: 39 more rows]

## Sheet: KEGG pathways_Cag_Que
Enriched KEGG pathways for DE miRNAs in oviposition inhibition process
[truncated: 40 more rows]

[truncated: 1 more sheets: KEGG pathways_Rel_Cag]
