# Supplementary material for: Integration of lncRNA–miRNA–mRNA reveals novel insights into oviposition regulation in honey bees
Source: PeerJ. 2017 Oct 5;5:e3881. doi: 10.7717/peerj.3881 (PMC5632538; doi:10.7717/peerj.3881)
Supplement: Table S6 [file peerj-05-3881-s006.xlsx]

## Sheet: Sheet1
Supplemental Table S6 Genes and lncRNAs located in the QTL region for ovary size
Type	Transcript id	Gene id	Gene name	Chromosome	Start	End
gene	XM_391859.5	408308	coiled-coil-helix-coiled-coil-helix domain-containing protein 10, mitochondrial(LOC408308)	chrLG11	11784838	11785941
gene	XM_006566444.1	408309	serine-arginine protein 55(LOC408309)	chrLG11	11697518	11709795
gene	XM_006566330.1	408351	serine-rich adhesin for platelets(LOC408351)	chrLG11	10335811	10368550
gene	XM_006566758.1	408354	nuclear factor of activated T-cells 5(LOC408354)	chrLG11	10720730	10742786
gene	XM_006566374.1	408358	RB1-inducible coiled-coil protein 1(LOC408358)	chrLG11	10914973	10952232
gene	XM_006566382.1	408359	MAGUK p55 subfamily member 6(LOC408359)	chrLG11	11134564	11153739
gene	XM_006566389.1	408361	alpha-tocopherol transfer protein-like(LOC408361)	chrLG11	11178329	11190764
gene	XM_391915.4	408365	uncharacterized LOC408365(LOC408365)	chrLG11	11249054	11254325
gene	XM_391917.5	408368	adenosylhomocysteinase(LOC408368)	chrLG11	11479220	11482964
gene	XM_006566411.1	408369	putative glutathione-specific gamma-glutamylcyclotransferase 2(LOC408369)	chrLG11	11559003	11561777
gene	XM_392622.5	409095	protein apterous(LOC409095)	chrLG11	10053282	10099609
gene	NM_001167836.1	409314	prohormone-2(LOC409314)	chrLG11	11855499	11861412
gene	XM_393736.4	410254	glutaryl-CoA dehydrogenase, mitochondrial(LOC410254)	chrLG11	12105429	12108542
gene	XM_393796.5	410315	G-protein-signaling modulator 2(LOC410315)	chrLG11	9678841	9684192
gene	XM_006566755.1	410316	A-kinase anchor protein 17A-like(LOC410316)	chrLG11	9685248	9689228
gene	XM_393798.5	410317	small conductance calcium-activated potassium channel protein(LOC410317)	chrLG11	9695207	9929278
gene	XM_393800.5	410319	HEAT repeat-containing protein 1(LOC410319)	chrLG11	10159471	10167015
gene	XM_393809.5	410328	zinc finger protein 341-like(LOC410328)	chrLG11	10662413	10665608
gene	NM_001277299.1	410331	transcription elongation factor SPT6-like(LOC410331)	chrLG11	10673766	10680590
gene	XM_006566366.1	410332	breast cancer anti-estrogen resistance protein 3(LOC410332)	chrLG11	10746612	10763490
gene	XM_006566378.1	410336	dipeptidyl aminopeptidase-like protein 6(LOC410336)	chrLG11	11010117	11109699
gene	NM_001126243.1	410337	venom dipeptidylpeptidase IV(LOC410337)	chrLG11	11123579	11129683
gene	XM_393820.5	410339	transcription termination factor 3, mitochondrial(LOC410339)	chrLG11	11157526	11159302
gene	XM_393821.5	410340	prolactin regulatory element-binding protein(LOC410340)	chrLG11	11288389	11290929
gene	XM_624653.3	410341	RNA pseudouridylate synthase domain-containing protein 2-like(LOC410341)	chrLG11	11293882	11458544
gene	XM_393823.4	410343	nuclear pore complex protein Nup93-like(LOC410343)	chrLG11	11462254	11465528
gene	XM_006566402.1	410345	WD repeat-containing protein 59(LOC410345)	chrLG11	11473209	11478652
gene	XM_393827.5	410347	protein big brother(LOC410347)	chrLG11	11488535	11498442
gene	XM_006566410.1	410348	katanin p80 WD40 repeat-containing subunit B1(LOC410348)	chrLG11	11545555	11555131
gene	XM_006566454.1	410352	putative DNA helicase Ino80(LOC410352)	chrLG11	11680356	11696693
gene	XM_006566472.1	412348	mediator of RNA polymerase II transcription subunit 19(LOC412348)	chrLG11	11847811	11849760
gene	XM_396203.5	412750	DNA topoisomerase 1(LOC412750)	chrLG11	10441063	10449290
gene	XM_397107.5	413666	peroxisome biogenesis factor 1(LOC413666)	chrLG11	9400669	9407832
gene	XM_006566305.1	413667	G2/mitotic-specific cyclin-B3(LOC413667)	chrLG11	9396773	9400635
gene	XM_006566295.1	413668	run domain Beclin-1-interacting and cysteine-rich domain-containing protein(LOC413668)	chrLG11	9390484	9394631
gene	XM_006566278.1	413837	kinesin 3B(LOC413837)	chrLG11	9314492	9340187
gene	NM_001011653.1	494503	troponin C type IIa(TpnCIIa)	chrLG11	11773372	11773882
gene	XM_623720.4	551323	uncharacterized LOC551323(LOC551323)	chrLG11	11274098	11286131
gene	XM_006566460.1	551683	palmitoyltransferase ZDHHC5(LOC551683)	chrLG11	11761984	11769515
gene	XM_006566455.1	551707	RNA-binding protein with serine-rich domain 1(LOC551707)	chrLG11	11759464	11761775
gene	XM_006566457.1	551735	fibrosin-1-like protein(LOC551735)	chrLG11	11737201	11758842
gene	XM_006566468.1	552303	RNA-binding protein cabeza-like(LOC552303)	chrLG11	11841967	11847019
gene	XM_624820.4	552447	clavesin-2(LOC552447)	chrLG11	11166191	11171919
gene	XM_003250795.2	552577	junctophilin-1-like(LOC552577)	chrLG11	10862842	10905127
gene	XM_006566494.1	552619	hepatocyte nuclear factor 6(LOC552619)	chrLG11	12117484	12181622
gene	XM_006566364.1	552651	stress response protein NST1(LOC552651)	chrLG11	10681956	10692650
gene	XM_006566760.1	552683	chitinase domain-containing protein 1(LOC552683)	chrLG11	11935891	11937783
gene	NM_001278705.1	552716	metallophosphoesterase 1 homolog(LOC552716)	chrLG11	10466290	10468286
gene	NM_001277300.1	552738	2-hydroxyacyl-CoA lyase 1-like(LOC552738)	chrLG11	11879985	11884594
gene	XM_006566341.1	552763	cell division control protein 6 homolog(LOC552763)	chrLG11	10427176	10429342
gene	XM_625203.3	552828	protein FRG1 homolog(LOC552828)	chrLG11	9348157	9349634
gene	XM_006566266.1	552833	pre-mRNA-splicing regulator female-lethal(2)D(LOC552833)	chrLG11	9305053	9311437
gene	XM_001119910.3	724154	SHC SH2 domain-binding protein 1 homolog B(LOC724154)	chrLG11	11457279	11460893
gene	XM_006566464.1	725244	mitochondrial Rho GTPase(LOC725244)	chrLG11	11779990	11784162
gene	XM_001121184.3	725324	uncharacterized LOC725324(LOC725324)	chrLG11	11788238	11812129
gene	XM_001121305.3	725462	vesicular glutamate transporter 2.1(LOC725462)	chrLG11	11871106	11881176
gene	NM_001278706.1	725821	uncharacterized LOC725821(LOC725821)	chrLG11	9302636	9304937
gene	XM_006566751.1	725951	crossover junction endonuclease MUS81(LOC725951)	chrLG11	9355503	9358336
gene	XM_006566511.1	725952	uncharacterized LOC725952(LOC725952)	chrLG11	12195397	12199461
gene	XM_001121937.3	726180	transcription factor Sox-19b-like(LOC726180)	chrLG11	9510953	9621638
gene	XM_006566342.1	726695	uncharacterized LOC726695(LOC726695)	chrLG11	10431832	10435035
gene	XM_006566357.1	726800	probable RNA polymerase II nuclear localization protein SLC7A6OS(LOC726800)	chrLG11	10660998	10662293
gene	XM_001122612.3	726896	zinc finger and BTB domain-containing protein 47-like(LOC726896)	chrLG11	10766539	10784733
gene	XM_006566371.1	726913	cytochrome b5-like(LOC726913)	chrLG11	10833446	10855347
gene	XM_006566386.1	727012	reactive oxygen species modulator 1(LOC727012)	chrLG11	11155526	11156828
gene	NM_001135909.1	100191002	ribosomal protein L41(Rpl41)	chrLG11	10429862	10430542
gene	XM_006566491.1	100577041	micronuclear linker histone polyprotein-like(LOC100577041)	chrLG11	12089000	12091734
gene	XM_003250856.2	100577456	fibrillin-2-like(LOC100577456)	chrLG11	9642962	9666166
gene	XM_003250857.2	100577644	mitochondrial assembly of ribosomal large subunit protein 1(LOC100577644)	chrLG11	10430615	10431754
gene	XM_003250858.2	100577801	zinc finger protein ush(LOC100577801)	chrLG11	10485524	10660383
gene	XM_003250821.2	100577879	carbonic anhydrase-related protein 10(LOC100577879)	chrLG11	9010285	9191588
gene	XM_006566420.1	100578547	uncharacterized LOC100578547(LOC100578547)	chrLG11	11710235	11716029
gene	XM_006566296.1	102656650	uncharacterized LOC102656650(LOC102656650)	chrLG11	9376024	9390127
lncRNA	TCONS_00292623	XLOC_080132	NA	chrLG11	8918623	8921321
lncRNA	TCONS_00299027	XLOC_074967	NA	chrLG11	11196100	11200130
lncRNA	TCONS_00303106	XLOC_075382	NA	chrLG11	12061465	12070121
lncRNA	TCONS_00263929	XLOC_073978	NA	chrLG11	9214358	9216922
lncRNA	TCONS_00264124	XLOC_074249	NA	chrLG11	9929440	9931044
lncRNA	TCONS_00264477	XLOC_075127	NA	chrLG11	11538285	11540301
lncRNA	TCONS_00277157	XLOC_073956	NA	chrLG11	8993665	8998726
lncRNA	TCONS_00281922	XLOC_073966	NA	chrLG11	9191907	9212289
lncRNA	TCONS_00286477	XLOC_073978	NA	chrLG11	9214358	9216922
lncRNA	TCONS_00299027	XLOC_074967	NA	chrLG11	11196100	11200130
lncRNA	TCONS_00306853	XLOC_073955	NA	chrLG11	8983005	8992186
lncRNA	TCONS_00309729	XLOC_081390	NA	chrLG11	11898332	11899370
lncRNA	TCONS_00314153	XLOC_081294	NA	chrLG11	11562287	11573473
lncRNA	TCONS_00316273	XLOC_073944	NA	chrLG11	8904857	8917136
