# Supplementary material for: Integration of lncRNA–miRNA–mRNA reveals novel insights into oviposition regulation in honey bees
Source: PeerJ. 2017 Oct 5;5:e3881. doi: 10.7717/peerj.3881 (PMC5632538; doi:10.7717/peerj.3881)
Supplement: Table S7 [file peerj-05-3881-s007.xlsx]

## Sheet: network
Supplemental Table S7 LncRNA-miRNA and miRNA-mRNA pairs to construct the network
source	target	type
TCONS_00903442	ame-miR-10	lncRNA_miRNA
TCONS_00073008	ame-miR-14	lncRNA_miRNA
TCONS_00073002	ame-miR-14	lncRNA_miRNA
TCONS_00514857	ame-miR-29b	lncRNA_miRNA
TCONS_00589798	ame-miR-3049-5p	lncRNA_miRNA
TCONS_00522562	ame-miR-33	lncRNA_miRNA
TCONS_00513805	ame-miR-33	lncRNA_miRNA
TCONS_00522563	ame-miR-33	lncRNA_miRNA
TCONS_00671388	ame-miR-33	lncRNA_miRNA
TCONS_00363121	ame-miR-33	lncRNA_miRNA
TCONS_00359219	ame-miR-33	lncRNA_miRNA
TCONS_00338065	ame-miR-33	lncRNA_miRNA
TCONS_00342139	ame-miR-33	lncRNA_miRNA
TCONS_00338064	ame-miR-33	lncRNA_miRNA
TCONS_00111528	ame-miR-33	lncRNA_miRNA
TCONS_00187130	ame-miR-33	lncRNA_miRNA
TCONS_00767782	ame-miR-3718a	lncRNA_miRNA
TCONS_00806076	ame-miR-3718a	lncRNA_miRNA
TCONS_00786170	ame-miR-3718a	lncRNA_miRNA
TCONS_00777706	ame-miR-3718a	lncRNA_miRNA
TCONS_00336169	ame-miR-375	lncRNA_miRNA
TCONS_00940372	ame-miR-3791	lncRNA_miRNA
TCONS_00940371	ame-miR-3791	lncRNA_miRNA
TCONS_00382132	ame-miR-6047a	lncRNA_miRNA
TCONS_00055967	ame-miR-6047a	lncRNA_miRNA
TCONS_00838406	ame-miR-6050	lncRNA_miRNA
TCONS_00857318	ame-miR-6056	lncRNA_miRNA
TCONS_00258078	ame-miR-6056	lncRNA_miRNA
TCONS_00544874	ame-miR-6064	lncRNA_miRNA
TCONS_00317457	ame-miR-87	lncRNA_miRNA
TCONS_00317456	ame-miR-87	lncRNA_miRNA
TCONS_00283244	ame-miR-87	lncRNA_miRNA
TCONS_00278631	ame-miR-87	lncRNA_miRNA
TCONS_00308192	ame-miR-87	lncRNA_miRNA
TCONS_00601258	ame-miR-87	lncRNA_miRNA
TCONS_00267122	ame-miR-92a	lncRNA_miRNA
TCONS_00279279	ame-miR-92a	lncRNA_miRNA
TCONS_00211839	ame-miR-965-3p	lncRNA_miRNA
TCONS_00241339	ame-miR-965-3p	lncRNA_miRNA
TCONS_00218677	ame-miR-965-3p	lncRNA_miRNA
TCONS_00870636	ame-miR-9864	lncRNA_miRNA
TCONS_00853425	ame-miR-9864	lncRNA_miRNA
TCONS_00853426	ame-miR-9864	lncRNA_miRNA
TCONS_00880465	ame-miR-9864	lncRNA_miRNA
TCONS_00670877	ame-miR-9865	lncRNA_miRNA
TCONS_00701516	ame-miR-9865	lncRNA_miRNA
TCONS_00528045	ame-miR-9895	lncRNA_miRNA
TCONS_00951008	ame-miR-9c	lncRNA_miRNA
TCONS_00999457	ame-miR-9c	lncRNA_miRNA
TCONS_00963227	ame-miR-9c	lncRNA_miRNA
TCONS_00995499	ame-miR-9c	lncRNA_miRNA
TCONS_00963228	ame-miR-9c	lncRNA_miRNA
TCONS_00494242	ame-miR-14	lncRNA_miRNA
TCONS_00494243	ame-miR-14	lncRNA_miRNA
TCONS_00488388	ame-miR-14	lncRNA_miRNA
TCONS_00409810	ame-miR-14	lncRNA_miRNA
TCONS_00774501	ame-miR-14	lncRNA_miRNA
TCONS_00019823	ame-miR-14	lncRNA_miRNA
TCONS_00019757	ame-miR-14	lncRNA_miRNA
TCONS_00041440	ame-miR-14	lncRNA_miRNA
TCONS_00317286	ame-miR-14	lncRNA_miRNA
TCONS_00308018	ame-miR-14	lncRNA_miRNA
TCONS_00413424	ame-miR-14	lncRNA_miRNA
TCONS_00895696	ame-miR-14	lncRNA_miRNA
TCONS_00922364	ame-miR-14	lncRNA_miRNA
TCONS_00606269	ame-miR-14	lncRNA_miRNA
TCONS_00642821	ame-miR-14	lncRNA_miRNA
TCONS_00620980	ame-miR-14	lncRNA_miRNA
TCONS_00308366	ame-miR-14	lncRNA_miRNA
TCONS_00742471	ame-miR-14	lncRNA_miRNA
TCONS_00894387	ame-miR-14	lncRNA_miRNA
TCONS_00382473	ame-miR-14	lncRNA_miRNA
TCONS_00395564	ame-miR-14	lncRNA_miRNA
TCONS_00595236	ame-miR-14	lncRNA_miRNA
TCONS_00947417	ame-miR-14	lncRNA_miRNA
TCONS_00411275	ame-miR-14	lncRNA_miRNA
TCONS_00373468	ame-miR-14	lncRNA_miRNA
TCONS_00460236	ame-miR-14	lncRNA_miRNA
TCONS_00494237	ame-miR-14	lncRNA_miRNA
TCONS_00534632	ame-miR-14	lncRNA_miRNA
TCONS_00924224	ame-miR-184	lncRNA_miRNA
TCONS_00947134	ame-miR-184	lncRNA_miRNA
TCONS_00911032	ame-miR-184	lncRNA_miRNA
TCONS_00540030	ame-miR-2796	lncRNA_miRNA
TCONS_00752613	ame-miR-279a	lncRNA_miRNA
TCONS_00752613	ame-miR-279d	lncRNA_miRNA
TCONS_00947403	ame-miR-3049-3p	lncRNA_miRNA
TCONS_00597995	ame-miR-315	lncRNA_miRNA
TCONS_00538739	ame-miR-315	lncRNA_miRNA
TCONS_00597994	ame-miR-315	lncRNA_miRNA
TCONS_00369359	ame-miR-315	lncRNA_miRNA
TCONS_00327929	ame-miR-33	lncRNA_miRNA
TCONS_00197014	ame-miR-33	lncRNA_miRNA
TCONS_00179085	ame-miR-33	lncRNA_miRNA
TCONS_00188360	ame-miR-33	lncRNA_miRNA
TCONS_00188361	ame-miR-33	lncRNA_miRNA
TCONS_00432715	ame-miR-33	lncRNA_miRNA
TCONS_00455138	ame-miR-33	lncRNA_miRNA
TCONS_00994711	ame-miR-33	lncRNA_miRNA
TCONS_00998555	ame-miR-33	lncRNA_miRNA
TCONS_00478151	ame-miR-33	lncRNA_miRNA
TCONS_00210637	ame-miR-33	lncRNA_miRNA
TCONS_00432352	ame-miR-33	lncRNA_miRNA
TCONS_00542275	ame-miR-33	lncRNA_miRNA
TCONS_00887763	ame-miR-33	lncRNA_miRNA
TCONS_00075995	ame-miR-33	lncRNA_miRNA
TCONS_00075994	ame-miR-33	lncRNA_miRNA
TCONS_00193978	ame-miR-33	lncRNA_miRNA
TCONS_00093472	ame-miR-33	lncRNA_miRNA
TCONS_00193979	ame-miR-33	lncRNA_miRNA
TCONS_00533659	ame-miR-33	lncRNA_miRNA
TCONS_00533660	ame-miR-33	lncRNA_miRNA
TCONS_00242643	ame-miR-3478	lncRNA_miRNA
TCONS_00220728	ame-miR-3478	lncRNA_miRNA
TCONS_00234792	ame-miR-3478	lncRNA_miRNA
TCONS_00258063	ame-miR-3478	lncRNA_miRNA
TCONS_00413424	ame-miR-3478	lncRNA_miRNA
TCONS_00382825	ame-miR-3478	lncRNA_miRNA
TCONS_00391672	ame-miR-3478	lncRNA_miRNA
TCONS_00182095	ame-miR-3718a	lncRNA_miRNA
TCONS_00255519	ame-miR-3718a	lncRNA_miRNA
TCONS_00259459	ame-miR-3718a	lncRNA_miRNA
TCONS_00606368	ame-miR-3727	lncRNA_miRNA
TCONS_00849931	ame-miR-3747b	lncRNA_miRNA
TCONS_00889268	ame-miR-3747b	lncRNA_miRNA
TCONS_00889269	ame-miR-3747b	lncRNA_miRNA
TCONS_00753260	ame-miR-3747b	lncRNA_miRNA
TCONS_00460147	ame-miR-375	lncRNA_miRNA
TCONS_00697662	ame-miR-375	lncRNA_miRNA
TCONS_00693718	ame-miR-375	lncRNA_miRNA
TCONS_00693717	ame-miR-375	lncRNA_miRNA
TCONS_00701821	ame-miR-375	lncRNA_miRNA
TCONS_00152851	ame-miR-375	lncRNA_miRNA
TCONS_00412218	ame-miR-375	lncRNA_miRNA
TCONS_00460236	ame-miR-375	lncRNA_miRNA
TCONS_00491318	ame-miR-375	lncRNA_miRNA
TCONS_00494237	ame-miR-375	lncRNA_miRNA
TCONS_00151035	ame-miR-375	lncRNA_miRNA
TCONS_00951593	ame-miR-375	lncRNA_miRNA
TCONS_00951594	ame-miR-375	lncRNA_miRNA
TCONS_00505609	ame-miR-375	lncRNA_miRNA
TCONS_00521385	ame-miR-375	lncRNA_miRNA
TCONS_00523791	ame-miR-375	lncRNA_miRNA
TCONS_00499239	ame-miR-375	lncRNA_miRNA
TCONS_00812945	ame-miR-6000a-5p	lncRNA_miRNA
TCONS_00780263	ame-miR-6000a-5p	lncRNA_miRNA
TCONS_00842269	ame-miR-6000a-5p	lncRNA_miRNA
TCONS_00801482	ame-miR-6000a-5p	lncRNA_miRNA
TCONS_00770508	ame-miR-6000a-5p	lncRNA_miRNA
TCONS_00692759	ame-miR-6000a-5p	lncRNA_miRNA
TCONS_00035264	ame-miR-6041	lncRNA_miRNA
TCONS_00193979	ame-miR-6047a	lncRNA_miRNA
TCONS_00093472	ame-miR-6047a	lncRNA_miRNA
TCONS_00313567	ame-miR-6047a	lncRNA_miRNA
TCONS_00774501	ame-miR-6049	lncRNA_miRNA
TCONS_00994718	ame-miR-6055	lncRNA_miRNA
TCONS_00788675	ame-miR-6056	lncRNA_miRNA
TCONS_00220728	ame-miR-6056	lncRNA_miRNA
TCONS_00549860	ame-miR-6056	lncRNA_miRNA
TCONS_00589798	ame-miR-6056	lncRNA_miRNA
TCONS_00922364	ame-miR-6056	lncRNA_miRNA
TCONS_00753260	ame-miR-6056	lncRNA_miRNA
TCONS_00472057	ame-miR-6056	lncRNA_miRNA
TCONS_00837086	ame-miR-6056	lncRNA_miRNA
TCONS_00190649	ame-miR-6056	lncRNA_miRNA
TCONS_00533439	ame-miR-6056	lncRNA_miRNA
TCONS_00501160	ame-miR-6056	lncRNA_miRNA
TCONS_00418118	ame-miR-6056	lncRNA_miRNA
TCONS_00746305	ame-miR-6056	lncRNA_miRNA
TCONS_00716950	ame-miR-6056	lncRNA_miRNA
TCONS_00155894	ame-miR-6056	lncRNA_miRNA
TCONS_00701510	ame-miR-6056	lncRNA_miRNA
TCONS_00971393	ame-miR-6056	lncRNA_miRNA
TCONS_00600160	ame-miR-6056	lncRNA_miRNA
TCONS_00259841	ame-miR-6056	lncRNA_miRNA
TCONS_00823693	ame-miR-6058	lncRNA_miRNA
TCONS_00763382	ame-miR-6058	lncRNA_miRNA
TCONS_00744245	ame-miR-6059	lncRNA_miRNA
TCONS_00264477	ame-miR-6059	lncRNA_miRNA
TCONS_00176718	ame-miR-6059	lncRNA_miRNA
TCONS_00589798	ame-miR-6059	lncRNA_miRNA
TCONS_00722701	ame-miR-6060	lncRNA_miRNA
TCONS_00759748	ame-miR-6060	lncRNA_miRNA
TCONS_00209732	ame-miR-6062	lncRNA_miRNA
TCONS_00184137	ame-miR-6064	lncRNA_miRNA
TCONS_00244176	ame-miR-6064	lncRNA_miRNA
TCONS_00271653	ame-miR-6064	lncRNA_miRNA
TCONS_00264636	ame-miR-6064	lncRNA_miRNA
TCONS_00900129	ame-miR-71	lncRNA_miRNA
TCONS_00559350	ame-miR-87	lncRNA_miRNA
TCONS_00597640	ame-miR-87	lncRNA_miRNA
TCONS_00528852	ame-miR-87	lncRNA_miRNA
TCONS_00571531	ame-miR-87	lncRNA_miRNA
TCONS_00552893	ame-miR-87	lncRNA_miRNA
TCONS_00552892	ame-miR-87	lncRNA_miRNA
TCONS_00582209	ame-miR-87	lncRNA_miRNA
TCONS_00922961	ame-miR-927a	lncRNA_miRNA
TCONS_00918779	ame-miR-927a	lncRNA_miRNA
TCONS_00922960	ame-miR-927a	lncRNA_miRNA
TCONS_00903698	ame-miR-927a	lncRNA_miRNA
TCONS_00933970	ame-miR-927a	lncRNA_miRNA
TCONS_00930313	ame-miR-927a	lncRNA_miRNA
TCONS_00701516	ame-miR-929	lncRNA_miRNA
TCONS_00573703	ame-miR-92a	lncRNA_miRNA
TCONS_00555520	ame-miR-92a	lncRNA_miRNA
TCONS_00369359	ame-miR-9864	lncRNA_miRNA
TCONS_00901074	ame-miR-9864	lncRNA_miRNA
TCONS_00489938	ame-miR-9866	lncRNA_miRNA
TCONS_00432352	ame-miR-9872	lncRNA_miRNA
TCONS_00533056	ame-miR-9891	lncRNA_miRNA
TCONS_00670877	ame-miR-9891	lncRNA_miRNA
TCONS_00701516	ame-miR-9891	lncRNA_miRNA
TCONS_00259841	ame-miR-9892	lncRNA_miRNA
TCONS_00622827	ame-miR-9895	lncRNA_miRNA
TCONS_00209871	ame-miR-9895	lncRNA_miRNA
TCONS_00199475	ame-miR-9a	lncRNA_miRNA
TCONS_00468247	ame-miR-9a	lncRNA_miRNA
TCONS_00459229	ame-miR-9a	lncRNA_miRNA
TCONS_00464169	ame-miR-9a	lncRNA_miRNA
TCONS_00471620	ame-miR-9a	lncRNA_miRNA
TCONS_00464171	ame-miR-9a	lncRNA_miRNA
TCONS_00199475	ame-miR-9b	lncRNA_miRNA
TCONS_00069371	novel_100	lncRNA_miRNA
TCONS_00382132	novel_73	lncRNA_miRNA
TCONS_00452252	novel_73	lncRNA_miRNA
TCONS_00947403	novel_73	lncRNA_miRNA
TCONS_00709518	novel_73	lncRNA_miRNA
TCONS_00142972	novel_99	lncRNA_miRNA
TCONS_00142971	novel_99	lncRNA_miRNA
100576222	ame-bantam	mRNA_miRNA
409314	ame-bantam	mRNA_miRNA
409512	ame-bantam	mRNA_miRNA
410084	ame-bantam	mRNA_miRNA
410958	ame-bantam	mRNA_miRNA
551391	ame-bantam	mRNA_miRNA
725361	ame-bantam	mRNA_miRNA
409723	ame-let-7	mRNA_miRNA
552168	ame-let-7	mRNA_miRNA
100576934	ame-miR-1000	mRNA_miRNA
102654470	ame-miR-100	mRNA_miRNA
102655810	ame-miR-100	mRNA_miRNA
408284	ame-miR-100	mRNA_miRNA
409158	ame-miR-100	mRNA_miRNA
409825	ame-miR-100	mRNA_miRNA
410022	ame-miR-100	mRNA_miRNA
410040	ame-miR-100	mRNA_miRNA
410414	ame-miR-100	mRNA_miRNA
724218	ame-miR-100	mRNA_miRNA
725194	ame-miR-100	mRNA_miRNA
725757	ame-miR-100	mRNA_miRNA
726899	ame-miR-100	mRNA_miRNA
100577320	ame-miR-12	mRNA_miRNA
100577943	ame-miR-12	mRNA_miRNA
102656620	ame-miR-12	mRNA_miRNA
408284	ame-miR-12	mRNA_miRNA
408609	ame-miR-12	mRNA_miRNA
408845	ame-miR-12	mRNA_miRNA
409152	ame-miR-12	mRNA_miRNA
409250	ame-miR-12	mRNA_miRNA
409397	ame-miR-12	mRNA_miRNA
409796	ame-miR-12	mRNA_miRNA
410567	ame-miR-12	mRNA_miRNA
410862	ame-miR-12	mRNA_miRNA
411704	ame-miR-12	mRNA_miRNA
413708	ame-miR-12	mRNA_miRNA
100577717	ame-miR-125	mRNA_miRNA
410944	ame-miR-125	mRNA_miRNA
413384	ame-miR-125	mRNA_miRNA
551124	ame-miR-12	mRNA_miRNA
551694	ame-miR-12	mRNA_miRNA
551707	ame-miR-12	mRNA_miRNA
552548	ame-miR-12	mRNA_miRNA
552649	ame-miR-12	mRNA_miRNA
551938	ame-miR-125	mRNA_miRNA
724607	ame-miR-12	mRNA_miRNA
725595	ame-miR-12	mRNA_miRNA
725681	ame-miR-12	mRNA_miRNA
726997	ame-miR-12	mRNA_miRNA
100578764	ame-miR-13a	mRNA_miRNA
100579006	ame-miR-13a	mRNA_miRNA
551273	ame-miR-13a	mRNA_miRNA
551461	ame-miR-13a	mRNA_miRNA
724487	ame-miR-13a	mRNA_miRNA
409512	ame-miR-1	mRNA_miRNA
412731	ame-miR-1	mRNA_miRNA
408609	ame-miR-14	mRNA_miRNA
408726	ame-miR-14	mRNA_miRNA
409587	ame-miR-14	mRNA_miRNA
552634	ame-miR-14	mRNA_miRNA
724078	ame-miR-14	mRNA_miRNA
727218	ame-miR-184	mRNA_miRNA
100576902	ame-miR-193	mRNA_miRNA
102654899	ame-miR-193	mRNA_miRNA
408862	ame-miR-193	mRNA_miRNA
410944	ame-miR-252a	mRNA_miRNA
411813	ame-miR-252a	mRNA_miRNA
552401	ame-miR-252a	mRNA_miRNA
725581	ame-miR-252a	mRNA_miRNA
726706	ame-miR-252a	mRNA_miRNA
410547	ame-miR-282	mRNA_miRNA
413575	ame-miR-282	mRNA_miRNA
725856	ame-miR-282	mRNA_miRNA
413384	ame-miR-3049-3p	mRNA_miRNA
552168	ame-miR-306	mRNA_miRNA
725480	ame-miR-307	mRNA_miRNA
408442	ame-miR-316	mRNA_miRNA
409587	ame-miR-316	mRNA_miRNA
727486	ame-miR-316	mRNA_miRNA
408879	ame-miR-31a	mRNA_miRNA
410331	ame-miR-31a	mRNA_miRNA
410516	ame-miR-31a	mRNA_miRNA
102654949	ame-miR-3477	mRNA_miRNA
724796	ame-miR-3478	mRNA_miRNA
408398	ame-miR-3732	mRNA_miRNA
409261	ame-miR-3732	mRNA_miRNA
102655737	ame-miR-3756	mRNA_miRNA
677673	ame-miR-3756	mRNA_miRNA
100576606	ame-miR-3758	mRNA_miRNA
100577803	ame-miR-3758	mRNA_miRNA
411492	ame-miR-3758	mRNA_miRNA
100576247	ame-miR-3759	mRNA_miRNA
100577108	ame-miR-3759	mRNA_miRNA
100578400	ame-miR-3759	mRNA_miRNA
100578680	ame-miR-3759	mRNA_miRNA
100578810	ame-miR-3759	mRNA_miRNA
100578829	ame-miR-3759	mRNA_miRNA
102655561	ame-miR-3759	mRNA_miRNA
102655654	ame-miR-3759	mRNA_miRNA
408884	ame-miR-3759	mRNA_miRNA
409070	ame-miR-3759	mRNA_miRNA
409177	ame-miR-3759	mRNA_miRNA
409539	ame-miR-3759	mRNA_miRNA
409600	ame-miR-3759	mRNA_miRNA
409670	ame-miR-3759	mRNA_miRNA
409826	ame-miR-3759	mRNA_miRNA
410280	ame-miR-3759	mRNA_miRNA
410294	ame-miR-3759	mRNA_miRNA
410447	ame-miR-3759	mRNA_miRNA
410565	ame-miR-3759	mRNA_miRNA
410779	ame-miR-3759	mRNA_miRNA
410824	ame-miR-3759	mRNA_miRNA
410825	ame-miR-3759	mRNA_miRNA
410957	ame-miR-3759	mRNA_miRNA
411269	ame-miR-3759	mRNA_miRNA
411376	ame-miR-3759	mRNA_miRNA
413264	ame-miR-3759	mRNA_miRNA
413995	ame-miR-3759	mRNA_miRNA
551028	ame-miR-3759	mRNA_miRNA
552261	ame-miR-3759	mRNA_miRNA
552265	ame-miR-3759	mRNA_miRNA
552297	ame-miR-3759	mRNA_miRNA
552747	ame-miR-3759	mRNA_miRNA
724520	ame-miR-3759	mRNA_miRNA
724807	ame-miR-3759	mRNA_miRNA
724978	ame-miR-3759	mRNA_miRNA
725243	ame-miR-3759	mRNA_miRNA
725861	ame-miR-3759	mRNA_miRNA
726591	ame-miR-3759	mRNA_miRNA
726611	ame-miR-3759	mRNA_miRNA
726972	ame-miR-3759	mRNA_miRNA
406095	ame-miR-3773	mRNA_miRNA
551527	ame-miR-3773	mRNA_miRNA
413020	ame-miR-6000a-3p	mRNA_miRNA
724283	ame-miR-6000a-3p	mRNA_miRNA
408879	ame-miR-6001-3p	mRNA_miRNA
410206	ame-miR-6001-3p	mRNA_miRNA
410408	ame-miR-6001-3p	mRNA_miRNA
410964	ame-miR-6001-3p	mRNA_miRNA
443552	ame-miR-6001-3p	mRNA_miRNA
552168	ame-miR-6001-3p	mRNA_miRNA
724367	ame-miR-6001-3p	mRNA_miRNA
100577523	ame-miR-6001-5p	mRNA_miRNA
408388	ame-miR-6001-5p	mRNA_miRNA
413755	ame-miR-6001-5p	mRNA_miRNA
408875	ame-miR-6005-3p	mRNA_miRNA
100578089	ame-miR-6038	mRNA_miRNA
100578116	ame-miR-6038	mRNA_miRNA
408458	ame-miR-6038	mRNA_miRNA
408649	ame-miR-6038	mRNA_miRNA
408804	ame-miR-6038	mRNA_miRNA
409028	ame-miR-6038	mRNA_miRNA
409311	ame-miR-6038	mRNA_miRNA
409624	ame-miR-6038	mRNA_miRNA
409856	ame-miR-6038	mRNA_miRNA
410100	ame-miR-6038	mRNA_miRNA
410241	ame-miR-6038	mRNA_miRNA
410263	ame-miR-6038	mRNA_miRNA
411260	ame-miR-6038	mRNA_miRNA
411294	ame-miR-6038	mRNA_miRNA
412388	ame-miR-6038	mRNA_miRNA
413133	ame-miR-6038	mRNA_miRNA
413688	ame-miR-6038	mRNA_miRNA
413906	ame-miR-6038	mRNA_miRNA
550969	ame-miR-6038	mRNA_miRNA
551189	ame-miR-6038	mRNA_miRNA
551198	ame-miR-6038	mRNA_miRNA
551210	ame-miR-6038	mRNA_miRNA
551484	ame-miR-6038	mRNA_miRNA
551734	ame-miR-6038	mRNA_miRNA
551906	ame-miR-6038	mRNA_miRNA
552083	ame-miR-6038	mRNA_miRNA
552231	ame-miR-6038	mRNA_miRNA
552440	ame-miR-6038	mRNA_miRNA
724502	ame-miR-6038	mRNA_miRNA
725497	ame-miR-6038	mRNA_miRNA
726000	ame-miR-6038	mRNA_miRNA
726416	ame-miR-6038	mRNA_miRNA
726887	ame-miR-6038	mRNA_miRNA
102654766	ame-miR-6041	mRNA_miRNA
102655126	ame-miR-6041	mRNA_miRNA
408299	ame-miR-6041	mRNA_miRNA
409801	ame-miR-6041	mRNA_miRNA
412948	ame-miR-6041	mRNA_miRNA
551527	ame-miR-6041	mRNA_miRNA
551553	ame-miR-6041	mRNA_miRNA
724239	ame-miR-6041	mRNA_miRNA
725882	ame-miR-6041	mRNA_miRNA
725256	ame-miR-6045	mRNA_miRNA
100576473	ame-miR-6046	mRNA_miRNA
102656630	ame-miR-6046	mRNA_miRNA
100577927	ame-miR-6048	mRNA_miRNA
552168	ame-miR-6058	mRNA_miRNA
724796	ame-miR-6061	mRNA_miRNA
408327	ame-miR-6067	mRNA_miRNA
411159	ame-miR-6067	mRNA_miRNA
412069	ame-miR-87	mRNA_miRNA
724285	ame-miR-87	mRNA_miRNA
100579026	ame-miR-927a	mRNA_miRNA
408635	ame-miR-927a	mRNA_miRNA
409876	ame-miR-927a	mRNA_miRNA
410362	ame-miR-927a	mRNA_miRNA
410853	ame-miR-927a	mRNA_miRNA
552087	ame-miR-927a	mRNA_miRNA
552342	ame-miR-927a	mRNA_miRNA
552636	ame-miR-927a	mRNA_miRNA
100578386	ame-miR-929	mRNA_miRNA
413366	ame-miR-929	mRNA_miRNA
726225	ame-miR-965-3p	mRNA_miRNA
408807	ame-miR-981	mRNA_miRNA
102656524	ame-miR-9864	mRNA_miRNA
411748	ame-miR-9864	mRNA_miRNA
410347	ame-miR-9866	mRNA_miRNA
410674	ame-miR-9880	mRNA_miRNA
100576321	ame-miR-9884	mRNA_miRNA
102655415	ame-miR-9884	mRNA_miRNA
408365	ame-miR-9884	mRNA_miRNA
408821	ame-miR-9884	mRNA_miRNA
409764	ame-miR-9884	mRNA_miRNA
409952	ame-miR-9884	mRNA_miRNA
410402	ame-miR-9884	mRNA_miRNA
412890	ame-miR-9884	mRNA_miRNA
413423	ame-miR-9884	mRNA_miRNA
725513	ame-miR-9884	mRNA_miRNA
725754	ame-miR-9884	mRNA_miRNA
725952	ame-miR-9884	mRNA_miRNA
726126	ame-miR-9884	mRNA_miRNA
726978	ame-miR-9884	mRNA_miRNA
100192200	ame-miR-9885	mRNA_miRNA
100577669	ame-miR-9885	mRNA_miRNA
408608	ame-miR-9885	mRNA_miRNA
411132	ame-miR-9885	mRNA_miRNA
412630	ame-miR-9885	mRNA_miRNA
724721	ame-miR-9885	mRNA_miRNA
726462	ame-miR-9885	mRNA_miRNA
551391	ame-miR-9886	mRNA_miRNA
100577979	ame-miR-996	mRNA_miRNA
100578957	ame-miR-996	mRNA_miRNA
102654082	ame-miR-996	mRNA_miRNA
409152	ame-miR-996	mRNA_miRNA
413408	ame-miR-996	mRNA_miRNA
724297	novel_100	mRNA_miRNA
100577057	novel_129	mRNA_miRNA
552029	novel_129	mRNA_miRNA
726637	novel_129	mRNA_miRNA
102654585	novel_53	mRNA_miRNA
102656107	novel_60	mRNA_miRNA
408879	novel_60	mRNA_miRNA
100576161	novel_67	mRNA_miRNA
100576797	novel_67	mRNA_miRNA
100578545	novel_67	mRNA_miRNA
102653988	novel_67	mRNA_miRNA
102654482	novel_67	mRNA_miRNA
724899	novel_67	mRNA_miRNA
726400	novel_99	mRNA_miRNA
