# Supplementary material for: Integration of lncRNA–miRNA–mRNA reveals novel insights into oviposition regulation in honey bees
Source: PeerJ. 2017 Oct 5;5:e3881. doi: 10.7717/peerj.3881 (PMC5632538; doi:10.7717/peerj.3881)
Supplement: Table S8 [file peerj-05-3881-s008.xlsx]

## Sheet: network
Supplemental Table S8 LncRNA-miRNA and miRNA-mRNA pairs with RNAs have known roles in reproduction and/or RNAs located in the QTL region for ovary size
source	target	type
409314	ame-bantam	miRNA_mRNA
409512	ame-bantam	miRNA_mRNA
410084	ame-bantam	miRNA_mRNA
410958	ame-bantam	miRNA_mRNA
551391	ame-bantam	miRNA_mRNA
725361	ame-bantam	miRNA_mRNA
100576222	ame-bantam	miRNA_mRNA
409723	ame-let-7	miRNA_mRNA
552168	ame-let-7	miRNA_mRNA
409512	ame-miR-1	miRNA_mRNA
412731	ame-miR-1	miRNA_mRNA
TCONS_00903442	ame-miR-10	lncRNA_miRNA
408284	ame-miR-100	miRNA_mRNA
409158	ame-miR-100	miRNA_mRNA
409825	ame-miR-100	miRNA_mRNA
410022	ame-miR-100	miRNA_mRNA
410040	ame-miR-100	miRNA_mRNA
410414	ame-miR-100	miRNA_mRNA
724218	ame-miR-100	miRNA_mRNA
725194	ame-miR-100	miRNA_mRNA
725757	ame-miR-100	miRNA_mRNA
726899	ame-miR-100	miRNA_mRNA
102654470	ame-miR-100	miRNA_mRNA
102655810	ame-miR-100	miRNA_mRNA
408284	ame-miR-12	miRNA_mRNA
408609	ame-miR-12	miRNA_mRNA
408845	ame-miR-12	miRNA_mRNA
409152	ame-miR-12	miRNA_mRNA
409250	ame-miR-12	miRNA_mRNA
409397	ame-miR-12	miRNA_mRNA
409796	ame-miR-12	miRNA_mRNA
410567	ame-miR-12	miRNA_mRNA
410862	ame-miR-12	miRNA_mRNA
411704	ame-miR-12	miRNA_mRNA
413708	ame-miR-12	miRNA_mRNA
551124	ame-miR-12	miRNA_mRNA
551694	ame-miR-12	miRNA_mRNA
551707	ame-miR-12	miRNA_mRNA
552548	ame-miR-12	miRNA_mRNA
552649	ame-miR-12	miRNA_mRNA
724607	ame-miR-12	miRNA_mRNA
725595	ame-miR-12	miRNA_mRNA
725681	ame-miR-12	miRNA_mRNA
726997	ame-miR-12	miRNA_mRNA
100577320	ame-miR-12	miRNA_mRNA
100577943	ame-miR-12	miRNA_mRNA
102656620	ame-miR-12	miRNA_mRNA
410944	ame-miR-125	miRNA_mRNA
413384	ame-miR-125	miRNA_mRNA
551938	ame-miR-125	miRNA_mRNA
100577717	ame-miR-125	miRNA_mRNA
408609	ame-miR-14	miRNA_mRNA
408726	ame-miR-14	miRNA_mRNA
409587	ame-miR-14	miRNA_mRNA
552634	ame-miR-14	miRNA_mRNA
724078	ame-miR-14	miRNA_mRNA
TCONS_00019757	ame-miR-14	lncRNA_miRNA
TCONS_00019823	ame-miR-14	lncRNA_miRNA
TCONS_00041440	ame-miR-14	lncRNA_miRNA
TCONS_00073002	ame-miR-14	lncRNA_miRNA
TCONS_00073008	ame-miR-14	lncRNA_miRNA
TCONS_00308018	ame-miR-14	lncRNA_miRNA
TCONS_00308366	ame-miR-14	lncRNA_miRNA
TCONS_00317286	ame-miR-14	lncRNA_miRNA
TCONS_00373468	ame-miR-14	lncRNA_miRNA
TCONS_00382473	ame-miR-14	lncRNA_miRNA
TCONS_00395564	ame-miR-14	lncRNA_miRNA
TCONS_00409810	ame-miR-14	lncRNA_miRNA
TCONS_00411275	ame-miR-14	lncRNA_miRNA
TCONS_00413424	ame-miR-14	lncRNA_miRNA
TCONS_00460236	ame-miR-14	lncRNA_miRNA
TCONS_00488388	ame-miR-14	lncRNA_miRNA
TCONS_00494237	ame-miR-14	lncRNA_miRNA
TCONS_00494242	ame-miR-14	lncRNA_miRNA
TCONS_00494243	ame-miR-14	lncRNA_miRNA
TCONS_00534632	ame-miR-14	lncRNA_miRNA
TCONS_00595236	ame-miR-14	lncRNA_miRNA
TCONS_00606269	ame-miR-14	lncRNA_miRNA
TCONS_00620980	ame-miR-14	lncRNA_miRNA
TCONS_00642821	ame-miR-14	lncRNA_miRNA
TCONS_00742471	ame-miR-14	lncRNA_miRNA
TCONS_00774501	ame-miR-14	lncRNA_miRNA
TCONS_00894387	ame-miR-14	lncRNA_miRNA
TCONS_00895696	ame-miR-14	lncRNA_miRNA
TCONS_00922364	ame-miR-14	lncRNA_miRNA
TCONS_00947417	ame-miR-14	lncRNA_miRNA
727218	ame-miR-184	miRNA_mRNA
TCONS_00911032	ame-miR-184	lncRNA_miRNA
TCONS_00924224	ame-miR-184	lncRNA_miRNA
TCONS_00947134	ame-miR-184	lncRNA_miRNA
410944	ame-miR-252a	miRNA_mRNA
411813	ame-miR-252a	miRNA_mRNA
552401	ame-miR-252a	miRNA_mRNA
725581	ame-miR-252a	miRNA_mRNA
726706	ame-miR-252a	miRNA_mRNA
TCONS_00540030	ame-miR-2796	lncRNA_miRNA
552168	ame-miR-306	miRNA_mRNA
TCONS_00369359	ame-miR-315	lncRNA_miRNA
TCONS_00538739	ame-miR-315	lncRNA_miRNA
TCONS_00597994	ame-miR-315	lncRNA_miRNA
TCONS_00597995	ame-miR-315	lncRNA_miRNA
408442	ame-miR-316	miRNA_mRNA
409587	ame-miR-316	miRNA_mRNA
727486	ame-miR-316	miRNA_mRNA
408879	ame-miR-31a	miRNA_mRNA
410331	ame-miR-31a	miRNA_mRNA
410516	ame-miR-31a	miRNA_mRNA
TCONS_00075994	ame-miR-33	lncRNA_miRNA
TCONS_00075995	ame-miR-33	lncRNA_miRNA
TCONS_00093472	ame-miR-33	lncRNA_miRNA
TCONS_00111528	ame-miR-33	lncRNA_miRNA
TCONS_00179085	ame-miR-33	lncRNA_miRNA
TCONS_00187130	ame-miR-33	lncRNA_miRNA
TCONS_00188360	ame-miR-33	lncRNA_miRNA
TCONS_00188361	ame-miR-33	lncRNA_miRNA
TCONS_00193978	ame-miR-33	lncRNA_miRNA
TCONS_00193979	ame-miR-33	lncRNA_miRNA
TCONS_00197014	ame-miR-33	lncRNA_miRNA
TCONS_00210637	ame-miR-33	lncRNA_miRNA
TCONS_00327929	ame-miR-33	lncRNA_miRNA
TCONS_00338064	ame-miR-33	lncRNA_miRNA
TCONS_00338065	ame-miR-33	lncRNA_miRNA
TCONS_00342139	ame-miR-33	lncRNA_miRNA
TCONS_00359219	ame-miR-33	lncRNA_miRNA
TCONS_00363121	ame-miR-33	lncRNA_miRNA
TCONS_00432352	ame-miR-33	lncRNA_miRNA
TCONS_00432715	ame-miR-33	lncRNA_miRNA
TCONS_00455138	ame-miR-33	lncRNA_miRNA
TCONS_00478151	ame-miR-33	lncRNA_miRNA
TCONS_00513805	ame-miR-33	lncRNA_miRNA
TCONS_00522562	ame-miR-33	lncRNA_miRNA
TCONS_00522563	ame-miR-33	lncRNA_miRNA
TCONS_00533659	ame-miR-33	lncRNA_miRNA
TCONS_00533660	ame-miR-33	lncRNA_miRNA
TCONS_00542275	ame-miR-33	lncRNA_miRNA
TCONS_00671388	ame-miR-33	lncRNA_miRNA
TCONS_00887763	ame-miR-33	lncRNA_miRNA
TCONS_00994711	ame-miR-33	lncRNA_miRNA
TCONS_00998555	ame-miR-33	lncRNA_miRNA
TCONS_00182095	ame-miR-3718a	lncRNA_miRNA
TCONS_00255519	ame-miR-3718a	lncRNA_miRNA
TCONS_00259459	ame-miR-3718a	lncRNA_miRNA
TCONS_00767782	ame-miR-3718a	lncRNA_miRNA
TCONS_00777706	ame-miR-3718a	lncRNA_miRNA
TCONS_00786170	ame-miR-3718a	lncRNA_miRNA
TCONS_00806076	ame-miR-3718a	lncRNA_miRNA
408879	ame-miR-6001-3p	miRNA_mRNA
410206	ame-miR-6001-3p	miRNA_mRNA
410408	ame-miR-6001-3p	miRNA_mRNA
410964	ame-miR-6001-3p	miRNA_mRNA
443552	ame-miR-6001-3p	miRNA_mRNA
552168	ame-miR-6001-3p	miRNA_mRNA
724367	ame-miR-6001-3p	miRNA_mRNA
TCONS_00264477	ame-miR-6059	lncRNA_miRNA
TCONS_00051768	ame-miR-71	lncRNA_miRNA
TCONS_00051769	ame-miR-71	lncRNA_miRNA
TCONS_00182476	ame-miR-71	lncRNA_miRNA
TCONS_00460476	ame-miR-71	lncRNA_miRNA
TCONS_00460477	ame-miR-71	lncRNA_miRNA
TCONS_00604317	ame-miR-71	lncRNA_miRNA
TCONS_00655658	ame-miR-71	lncRNA_miRNA
TCONS_00661463	ame-miR-71	lncRNA_miRNA
TCONS_00675050	ame-miR-71	lncRNA_miRNA
TCONS_00682420	ame-miR-71	lncRNA_miRNA
TCONS_00685850	ame-miR-71	lncRNA_miRNA
TCONS_00685851	ame-miR-71	lncRNA_miRNA
TCONS_00689536	ame-miR-71	lncRNA_miRNA
TCONS_00694535	ame-miR-71	lncRNA_miRNA
TCONS_00900129	ame-miR-71	lncRNA_miRNA
TCONS_00928509	ame-miR-71	lncRNA_miRNA
TCONS_00267122	ame-miR-92a	lncRNA_miRNA
TCONS_00279279	ame-miR-92a	lncRNA_miRNA
TCONS_00555520	ame-miR-92a	lncRNA_miRNA
TCONS_00573703	ame-miR-92a	lncRNA_miRNA
410347	ame-miR-9866	miRNA_mRNA
408365	ame-miR-9884	miRNA_mRNA
725952	ame-miR-9884	miRNA_mRNA
409152	ame-miR-996	miRNA_mRNA
413408	ame-miR-996	miRNA_mRNA
100577979	ame-miR-996	miRNA_mRNA
100578957	ame-miR-996	miRNA_mRNA
102654082	ame-miR-996	miRNA_mRNA
TCONS_00199475	ame-miR-9a	lncRNA_miRNA
TCONS_00459229	ame-miR-9a	lncRNA_miRNA
TCONS_00464169	ame-miR-9a	lncRNA_miRNA
TCONS_00464171	ame-miR-9a	lncRNA_miRNA
TCONS_00468247	ame-miR-9a	lncRNA_miRNA
TCONS_00471620	ame-miR-9a	lncRNA_miRNA
